# Supplementary material for: Network pharmacology and molecular docking analysis on molecular targets and mechanisms of Gastrodia elata Blume in the treatment of ischemic stroke
Source: PubMed Central journal article supplement — Exp Ther Med. 2022 Nov 3;24(6):742. doi: 10.3892/etm.2022.11678 (PMC9764286; doi:10.3892/etm.2022.11678), 2022-11-03

Figure S1. Detailed screening process for active ingredients. Methods to obtain active ingredients and detailed information of GEB using ETCM and TCMSP database, using Vanillin as an example. (A) Search *Gastrodia* in ETCM (tcmpip.cn/ETCM/index.php/Home/). (B) Obtain Vanillin from the active ingredients of GE. (C) Open TCMSP database (tcmsp-e.com/tcmsp.php), select Chemical name and search Vanillin. (D) Select first chemical from list of chemicals similar to Vanillin. (E) Obtain oral bioavailability, drug-likeness (DL) and other details of the active ingredients. ETCM, Encyclopedia of Traditional Chinese Medicine; GEB, *Gastrodia elata* Blume; TCMSP, Traditional Chinese Medicine Systems Pharmacology.

**A**



**B**

| Chemical Component | Candidate Target genes                                                                       |
|--------------------|----------------------------------------------------------------------------------------------|
| Vanillin           | ALB(0.8947), AR(0.8571), ESR1(0.8571), ESR2(0.8571), PGR(0.8571), PLA2G1B(0.8), PLA2G2E(0.8) |

**C**



**D**



**E**

| Molecule Information                          |                                                                                                                                                                                                                                                                                                                                                                                                                               |      |       |        |        |        |        |       |       |       |       |     |    |        |      |   |   |       |      |      |      |      |       |   |       |
|-----------------------------------------------|-------------------------------------------------------------------------------------------------------------------------------------------------------------------------------------------------------------------------------------------------------------------------------------------------------------------------------------------------------------------------------------------------------------------------------|------|-------|--------|--------|--------|--------|-------|-------|-------|-------|-----|----|--------|------|---|---|-------|------|------|------|------|-------|---|-------|
| Molecule ID                                   | MOL000635                                                                                                                                                                                                                                                                                                                                                                                                                     |      |       |        |        |        |        |       |       |       |       |     |    |        |      |   |   |       |      |      |      |      |       |   |       |
| Molecule name                                 | vanillin                                                                                                                                                                                                                                                                                                                                                                                                                      |      |       |        |        |        |        |       |       |       |       |     |    |        |      |   |   |       |      |      |      |      |       |   |       |
| Download structure (click to download)        |                                                                                                                                                                                                                                                                                                                                            |      |       |        |        |        |        |       |       |       |       |     |    |        |      |   |   |       |      |      |      |      |       |   |       |
| Pharmacological and molecular properties data | <table border="1"> <thead> <tr> <th>MW</th> <th>AlogP</th> <th>Hdon</th> <th>Hacc</th> <th>OB (%)</th> <th>Caco-2</th> <th>BBB</th> <th>DL</th> <th>FASA-</th> <th>TPSA</th> <th>RBN</th> <th>HL</th> </tr> </thead> <tbody> <tr> <td>152.16</td> <td>1.31</td> <td>1</td> <td>3</td> <td>52.00</td> <td>0.68</td> <td>0.41</td> <td>0.03</td> <td>0.33</td> <td>46.53</td> <td>2</td> <td>11.79</td> </tr> </tbody> </table> | MW   | AlogP | Hdon   | Hacc   | OB (%) | Caco-2 | BBB   | DL    | FASA- | TPSA  | RBN | HL | 152.16 | 1.31 | 1 | 3 | 52.00 | 0.68 | 0.41 | 0.03 | 0.33 | 46.53 | 2 | 11.79 |
| MW                                            | AlogP                                                                                                                                                                                                                                                                                                                                                                                                                         | Hdon | Hacc  | OB (%) | Caco-2 | BBB    | DL     | FASA- | TPSA  | RBN   | HL    |     |    |        |      |   |   |       |      |      |      |      |       |   |       |
| 152.16                                        | 1.31                                                                                                                                                                                                                                                                                                                                                                                                                          | 1    | 3     | 52.00  | 0.68   | 0.41   | 0.03   | 0.33  | 46.53 | 2     | 11.79 |     |    |        |      |   |   |       |      |      |      |      |       |   |       |
| InChIKey                                      | MWOOGJBJHARFG-UHFFFAOYSA-N                                                                                                                                                                                                                                                                                                                                                                                                    |      |       |        |        |        |        |       |       |       |       |     |    |        |      |   |   |       |      |      |      |      |       |   |       |

Figure S2. Volcano map of differentially expressed genes. The abscissa  $\log_2FC$  represents the difference (ischemic stroke/normal) and the ordinate represents confidence level  $[-\log_{10}(P\text{-value})]$ . Each point in the figure represents a gene. The dashed lines on the horizontal and vertical axes represent the  $\log_2FC$  absolute threshold of 0.5 and P-value threshold of 0.05, respectively. FC, fold change.

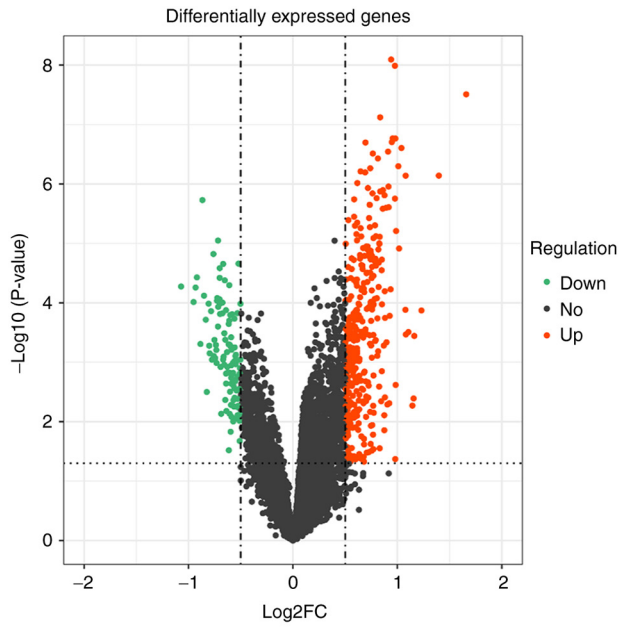

Supplement: Supplementary_Data1.pdf [file Supplementary_Data1.pdf]
