# Supplementary material for: Network pharmacology and molecular docking analysis on molecular targets and mechanisms of Gastrodia elata Blume in the treatment of ischemic stroke
Source: PubMed Central journal article supplement — Exp Ther Med. 2022 Nov 3;24(6):742. doi: 10.3892/etm.2022.11678 (PMC9764286; doi:10.3892/etm.2022.11678), 2022-11-03
Supplement: Supplementary_Data2.pdf [file Supplementary_Data2.pdf]

**Table SI.** Potential targets of GE in ETCM databases.

| Chemical component | Candidate target genes | Tanimoto score |
|--------------------|------------------------|----------------|
| Sitosterol         | AKR1C1                 | 0.8158         |
|                    | AKR1C2                 | 0.8158         |
|                    | AR                     | 0.8421         |
|                    | CLEC4E                 | 0.9714         |
|                    | ESR1                   | 0.8421         |
|                    | ESR2                   | 0.8378         |
|                    | GABRA1                 | 0.8378         |
|                    | GABRA2                 | 0.8378         |
|                    | GABRA3                 | 0.8378         |
|                    | GABRA4                 | 0.8378         |
|                    | GABRA5                 | 0.8378         |
|                    | GABRA6                 | 0.8378         |
|                    | GABRB1                 | 0.8378         |
|                    | GABRB2                 | 0.8378         |
|                    | GABRB3                 | 0.8378         |
|                    | GABRD                  | 0.8378         |
|                    | GABRE                  | 0.8378         |
|                    | GABRG1                 | 0.8378         |
|                    | GABRG2                 | 0.8378         |
|                    | GABRG3                 | 0.8378         |
|                    | GABRP                  | 0.8378         |
|                    | GABRQ                  | 0.8378         |
|                    | GRIN1                  | 0.8378         |
|                    | GRIN2A                 | 0.8378         |
|                    | GRIN2B                 | 0.8378         |
|                    | GRIN2C                 | 0.8378         |
|                    | GRIN2D                 | 0.8378         |
|                    | GRIN3A                 | 0.8378         |
|                    | GRIN3B                 | 0.8378         |
|                    | HSD17B1                | 0.8378         |
|                    | LIP3                   | 0.8205         |
|                    | LSS                    | 0.9444         |
|                    | NCOA2                  | 0.8158         |
|                    | NR1I2                  | 0.8649         |
|                    | NR1I3                  | 0.9714         |
|                    | NR3C1                  | 0.8250         |
|                    | NR3C2                  | 0.8158         |
|                    | PGR                    | 0.8378         |
|                    | PPARA                  | 0.8378         |
|                    | RORA                   | 0.9714         |
|                    | SIGMAR1                | 0.8378         |

|               |         |        |
|---------------|---------|--------|
|               | SULT2A1 | 0.8378 |
|               | SULT2B1 | 0.8649 |
|               | VDR     | 0.9714 |
| Vanillin      | ALB     | 0.8947 |
|               | AR      | 0.8571 |
|               | ESR1    | 0.8571 |
|               | ESR2    | 0.8571 |
|               | PGR     | 0.8571 |
|               | PLA2G1B | 0.8000 |
|               | PLA2G2E | 0.8000 |
| Palmitic Acid | ABAT    | 0.8095 |
|               | ABL1    | 1.0000 |
|               | ACADSB  | 0.8095 |
|               | ACOX1   | 0.8000 |
|               | ACSL3   | 0.8571 |
|               | ACSL4   | 0.8571 |
|               | ADH5    | 1.0000 |
|               | ALDH5A1 | 0.8095 |
|               | ARF1    | 1.0000 |
|               | ARF6    | 1.0000 |
|               | C8G     | 1.0000 |
|               | CALM1   | 1.0000 |
|               | CNR1    | 0.8333 |
|               | CNR2    | 0.8333 |
|               | CYP2C8  | 1.0000 |
|               | ECI2    | 1.0000 |
|               | ELOVL4  | 0.8571 |
|               | FADS1   | 0.8571 |
|               | FADS2   | 0.8571 |
|               | FFAR1   | 0.8571 |
|               | FKBP1A  | 1.0000 |
|               | FURIN   | 1.0000 |
|               | GLTP    | 1.0000 |
|               | GM2A    | 1.0000 |
|               | GUCA1A  | 1.0000 |
|               | HAO1    | 0.8000 |
|               | HDAC2   | 0.8095 |
|               | HDAC9   | 0.8095 |
|               | HNF4A   | 1.0000 |
|               | HNF4G   | 1.0000 |
|               | INS     | 1.0000 |
|               | LALBA   | 1.0000 |
|               | LIP3    | 1.0000 |

|  |             |        |
|--|-------------|--------|
|  | LTB4R       | 0.8000 |
|  | LTB4R2      | 0.8000 |
|  | LTF         | 1.0000 |
|  | LY96        | 1.0000 |
|  | NCOA1       | 1.0000 |
|  | NR1H4       | 0.9524 |
|  | OGDH        | 0.8095 |
|  | PAEP        | 1.0000 |
|  | PKIA        | 1.0000 |
|  | PLA2G1B     | 1.0000 |
|  | PLA2G2A     | 1.0000 |
|  | PLA2G2D     | 1.0000 |
|  | PLA2G2E     | 1.0000 |
|  | PMP2        | 1.0000 |
|  | PPARA       | 1.0000 |
|  | PPARD       | 0.9524 |
|  | PPARG       | 1.0000 |
|  | PPA_RS05235 | 0.9524 |
|  | PPP3CA      | 1.0000 |
|  | PPP3R1      | 1.0000 |
|  | PPT1        | 1.0000 |
|  | PRKACA      | 1.0000 |
|  | PTGS1       | 0.9524 |
|  | PTGS2       | 0.9524 |
|  | PVR         | 1.0000 |
|  | RCVRN       | 1.0000 |
|  | RHO         | 1.0000 |
|  | RXRA        | 0.9524 |
|  | RXRB        | 0.8095 |
|  | RXRG        | 0.8095 |
|  | S100B       | 0.8571 |
|  | SCN10A      | 0.8095 |
|  | SCN11A      | 0.8095 |
|  | SCN1A       | 0.8095 |
|  | SCN1B       | 0.8095 |
|  | SCN2A       | 0.8095 |
|  | SCN2B       | 0.8095 |
|  | SCN3A       | 0.8095 |
|  | SCN3B       | 0.8095 |
|  | SCN4A       | 0.8095 |
|  | SCN4B       | 0.8095 |
|  | SCN5A       | 0.8095 |
|  | SCN7A       | 0.8095 |

|         |              |        |
|---------|--------------|--------|
|         | SCN8A        | 0.8095 |
|         | SCN9A        | 0.8095 |
|         | SEC14L2      | 1.0000 |
|         | SLC8A1       | 0.8571 |
|         | SREBF1       | 0.8095 |
|         | TLR4         | 1.0000 |
|         | TM1468       | 1.0000 |
|         | TRAPPC3      | 1.0000 |
|         | TRPV1        | 0.8571 |
|         | VLDLR        | 1.0000 |
| Sucrose | ABO          | 0.8158 |
|         | ACTA1        | 1.0000 |
|         | AMY1A        | 0.8000 |
|         | AMY2A        | 0.8000 |
|         | AMY2B        | 0.8611 |
|         | ATOX1        | 1.0000 |
|         | BAMF_RS28815 | 0.8000 |
|         | CYP2B6       | 0.8205 |
|         | FHIT         | 0.8611 |
|         | FTL          | 0.8333 |
|         | GCK          | 0.8000 |
|         | GLT6D1       | 0.8611 |
|         | GLTP         | 0.8611 |
|         | GNPDA1       | 0.8000 |
|         | HBA1         | 0.8974 |
|         | HBB          | 0.8333 |
|         | HK1          | 0.8000 |
|         | IFNB1        | 0.8000 |
|         | KRTAP5-2     | 0.8000 |
|         | KRTAP5-3     | 0.8000 |
|         | LCTL         | 0.8000 |
|         | LGALS2       | 0.8000 |
|         | LGALS3       | 0.8611 |
|         | LGALS7       | 0.8000 |
|         | LYZ          | 1.0000 |
|         | MB           | 0.8000 |
|         | NCAN         | 0.8000 |
|         | NUDT9        | 0.8000 |
|         | PTGS1        | 0.8000 |
|         | PYGL         | 0.8000 |
|         | PYGM         | 0.8000 |
|         | RTCB         | 1.0000 |
|         | SFTPD        | 0.8000 |

|               |          |        |
|---------------|----------|--------|
|               | SIGLEC1  | 0.8000 |
|               | SMARCA5  | 0.8000 |
|               | TAS1R2   | 1.0000 |
|               | TM0024   | 0.8000 |
| Succinic Acid | ACO2     | 0.8235 |
|               | AKR1D1   | 0.8421 |
|               | ALAD     | 0.8421 |
|               | ALDH5A1  | 1.0000 |
|               | ASPH     | 1.0000 |
|               | BBOX1    | 1.0000 |
|               | HBA1     | 0.8421 |
|               | HBB      | 0.8421 |
|               | HSD17B6  | 1.0000 |
|               | OXCT1    | 1.0000 |
|               | OXCT2    | 1.0000 |
|               | P3H1     | 1.0000 |
|               | P3H2     | 1.0000 |
|               | P3H3     | 1.0000 |
|               | P4HA1    | 1.0000 |
|               | P4HA2    | 1.0000 |
|               | PLOD1    | 1.0000 |
|               | PLOD3    | 1.0000 |
|               | SDHA     | 1.0000 |
|               | SDHB     | 1.0000 |
|               | SDHC     | 1.0000 |
|               | SDHD     | 1.0000 |
|               | SLC13A1  | 1.0000 |
|               | SLC13A2  | 1.0000 |
|               | SLC13A3  | 1.0000 |
|               | SLC25A10 | 1.0000 |
|               | SRD5A2   | 0.8421 |
|               | SUCLA2   | 1.0000 |
|               | SUCLG1   | 1.0000 |
|               | SUCLG2   | 1.0000 |
|               | SUCNR1   | 1.0000 |
|               | TMLHE    | 1.0000 |
|               | TYR      | 0.8421 |
| Alexandrin    | ANXA1    | 0.8148 |
|               | ATP1A1   | 0.8421 |
|               | ATP1A2   | 0.8246 |
|               | ATP1A3   | 0.8246 |
|               | CASP3    | 0.8333 |
|               | GABRB3   | 0.8596 |

|                       |          |        |
|-----------------------|----------|--------|
|                       | GLRA3    | 0.8596 |
|                       | HSD11B1  | 0.8333 |
|                       | HSD11B2  | 0.8148 |
|                       | HSD3B1   | 0.8148 |
|                       | LPL      | 0.8333 |
|                       | NFKB1    | 0.8333 |
|                       | NFKB2    | 0.8333 |
|                       | NR3C1    | 0.8148 |
|                       | PPP1CC   | 0.8036 |
|                       | SLCO1B3  | 0.9074 |
|                       | TNF      | 0.8333 |
|                       | VDR      | 0.8148 |
|                       | YWHAЕ    | 0.8103 |
| P-Hydroxybenzaldehyde | ALB      | 0.8333 |
|                       | E        | 0.8333 |
|                       | ERG11    | 0.8000 |
|                       | TYR      | 0.8462 |
| Citric Acid           | ACO2     | 0.9167 |
|                       | AKR1B1   | 1.0000 |
|                       | ANG      | 1.0000 |
|                       | APRT     | 1.0000 |
|                       | BC1747   | 1.0000 |
|                       | BHMT     | 1.0000 |
|                       | C8G      | 1.0000 |
|                       | CPB1     | 1.0000 |
|                       | CS       | 1.0000 |
|                       | CTDSP1   | 1.0000 |
|                       | GNMT     | 1.0000 |
|                       | HGS      | 1.0000 |
|                       | HS3ST3A1 | 1.0000 |
|                       | IDH1     | 0.9091 |
|                       | IDH2     | 0.9091 |
|                       | IL4I1    | 1.0000 |
|                       | ITEVIR   | 1.0000 |
|                       | ITPA     | 1.0000 |
|                       | LSM6     | 1.0000 |
|                       | MDH2     | 1.0000 |
|                       | ME2      | 0.8636 |
|                       | MIF      | 1.0000 |
|                       | PDE5A    | 1.0000 |
|                       | PLEKHA1  | 1.0000 |
|                       | RNASE1   | 1.0000 |
|                       | RNASE3   | 1.0000 |

|                                                               |              |        |
|---------------------------------------------------------------|--------------|--------|
|                                                               | SRC          | 1.0000 |
|                                                               | TM0857       | 1.0000 |
|                                                               | TM1436       | 1.0000 |
|                                                               | TNFSF13B     | 1.0000 |
|                                                               | UCK2         | 1.0000 |
| Protocatechuic Aldehyde                                       | LCN2         | 0.8182 |
|                                                               | MIF          | 0.8571 |
| Bis(4-Hydroxybenzyl)Ether<br>Mono- $\beta$ -D-Glucopyranoside | ABO          | 0.8378 |
|                                                               | ALDH2        | 0.8000 |
|                                                               | AMY1A        | 0.8235 |
|                                                               | AMY2A        | 0.8235 |
|                                                               | AMY2B        | 0.8857 |
|                                                               | AR           | 0.8205 |
|                                                               | BAMF_RS28815 | 0.8235 |
|                                                               | GCK          | 0.8235 |
|                                                               | GLT6D1       | 0.8857 |
|                                                               | GLTP         | 0.8857 |
|                                                               | GNPDA1       | 0.8235 |
|                                                               | HK1          | 0.8235 |
|                                                               | IFNB1        | 0.8235 |
|                                                               | KRTAP5-2     | 0.8235 |
|                                                               | KRTAP5-3     | 0.8235 |
|                                                               | LCT          | 0.8000 |
|                                                               | LCTL         | 0.8235 |
|                                                               | LGALS2       | 0.8235 |
|                                                               | LGALS3       | 0.8857 |
|                                                               | LGALS7       | 0.8235 |
|                                                               | MB           | 0.8235 |
|                                                               | MBL2         | 0.8056 |
|                                                               | NCAN         | 0.8235 |
|                                                               | NUDT9        | 0.8235 |
|                                                               | PTGS1        | 0.8235 |
|                                                               | PYGL         | 0.8235 |
|                                                               | PYGM         | 0.8235 |
|                                                               | SFTPD        | 0.8235 |
|                                                               | SIGLEC1      | 0.8235 |
|                                                               | SMARCA5      | 0.8235 |
|                                                               | TM0024       | 0.8235 |
|                                                               | TYR          | 0.9412 |
| Bis(4-Hydroxybenzyl)Ether                                     | TYR          | 0.8000 |
| 4,4'-Dihydroxydiphenyl Methane                                | ERG11        | 0.8125 |
|                                                               | TYR          | 0.8571 |
| Gastrodin                                                     | ABO          | 0.8611 |

|  |              |        |
|--|--------------|--------|
|  | ALDH2        | 0.8205 |
|  | AMY1A        | 0.8485 |
|  | AMY2A        | 0.8485 |
|  | AMY2B        | 0.9118 |
|  | AR           | 0.8421 |
|  | BAMF_RS28815 | 0.8485 |
|  | CYP2B6       | 0.8158 |
|  | GCK          | 0.8485 |
|  | GLT6D1       | 0.9118 |
|  | GLTP         | 0.9118 |
|  | GNPDA1       | 0.8485 |
|  | HK1          | 0.8485 |
|  | IFNB1        | 0.8485 |
|  | KRTAP5-2     | 0.8485 |
|  | KRTAP5-3     | 0.8485 |
|  | LCT          | 0.8235 |
|  | LCTL         | 0.8485 |
|  | LGALS2       | 0.8485 |
|  | LGALS3       | 0.9118 |
|  | LGALS7       | 0.8485 |
|  | MB           | 0.8485 |
|  | MBL2         | 0.8286 |
|  | NCAN         | 0.8485 |
|  | NUDT9        | 0.8485 |
|  | PTGS1        | 0.8485 |
|  | PYGL         | 0.8485 |
|  | PYGM         | 0.8485 |
|  | SFTPD        | 0.8485 |
|  | SIGLEC1      | 0.8485 |
|  | SMARCA5      | 0.8485 |
|  | TM0024       | 0.8485 |
|  | TYR          | 0.9697 |

**Table SII.** Potential targets of GE in the SwissTargetPrediction database.

| Chemical component | Target                                                      | Gene common name |
|--------------------|-------------------------------------------------------------|------------------|
| Sitosterol         | HMG-CoA reductase                                           | HMGCR            |
|                    | Cytochrome P450 51 (by homology)                            | CYP51A1          |
|                    | Androgen Receptor                                           | AR               |
|                    | Niemann-Pick C1-like protein 1                              | NPC1L1           |
|                    | LXR- $\alpha$                                               | NR1H3            |
|                    | Cytochrome P450 17A1                                        | CYP17A1          |
|                    | Nuclear receptor ROR- $\gamma$                              | RORC             |
|                    | Cytochrome P450 19A1                                        | CYP19A1          |
|                    | Estrogen receptor $\beta$                                   | ESR2             |
|                    | Estrogen receptor $\alpha$                                  | ESR1             |
|                    | Testis-specific androgen-binding protein                    | SHBG             |
|                    | Sterol regulatory element-binding protein 2                 | SREBF2           |
|                    | Cytochrome P450 2C19                                        | CYP2C19          |
|                    | Norepinephrine transporter                                  | SLC6A2           |
|                    | Butyrylcholinesterase                                       | BCHE             |
|                    | Nuclear receptor ROR- $\alpha$                              | RORA             |
|                    | Protein-tyrosine phosphatase 1B                             | PTPN1            |
|                    | Corticosteroid binding globulin                             | SERPINA6         |
|                    | Serotonin transporter                                       | SLC6A4           |
|                    | Glucose-6-phosphate 1-dehydrogenase                         | G6PD             |
|                    | Nuclear receptor subfamily 1 group I member 3 (by homology) | NR1I3            |
|                    | Muscarinic acetylcholine receptor M2                        | CHRM2            |
|                    | Acetylcholinesterase                                        | ACHE             |
|                    | Vitamin D receptor                                          | VDR              |
|                    | Carboxylesterase 2                                          | CES2             |
|                    | LXR- $\beta$                                                | NR1H2            |
|                    | Dual specificity phosphatase Cdc25A                         | CDC25A           |
|                    | Prostanoid EP1 receptor (by homology)                       | PTGER1           |
|                    | Prostanoid EP2 receptor (by homology)                       | PTGER2           |
|                    | 11- $\beta$ -hydroxysteroid dehydrogenase 1                 | HSD11B1          |
|                    | Anti-estrogen binding site (AEBS) (by homology)             | DHCR7            |
|                    | Glycine receptor subunit $\alpha$ -1                        | GLRA1            |
|                    | Peroxisome proliferator-activated receptor $\delta$         | PPARD            |
|                    | Squalene monooxygenase                                      | SQLE             |
|                    | Protein-tyrosine phosphatase 1C                             | PTPN6            |
|                    | Squalene synthetase (by homology)                           | FDFT1            |
|                    | Nitric oxide synthase, inducible (by homology)              | NOS2             |
|                    | Glucocorticoid receptor                                     | NR3C1            |
|                    | Dual specificity phosphatase Cdc25B                         | CDC25B           |

|                                                          |         |
|----------------------------------------------------------|---------|
| Sonic hedgehog protein (by homology)                     | SHH     |
| UDP-glucuronosyltransferase 2B7                          | UGT2B7  |
| 11- $\beta$ -hydroxysteroid dehydrogenase 2              | HSD11B2 |
| Dopamine D2 receptor                                     | DRD2    |
| DNA polymerase $\beta$ (by homology)                     | POLB    |
| Prolyl endopeptidase                                     | PREP    |
| Thromboxane-A synthase                                   | TBXAS1  |
| Prostanoid EP4 receptor (by homology)                    | PTGER4  |
| Indoleamine 2,3-dioxygenase                              | IDO1    |
| Protein Mdm4                                             | MDM4    |
| C-C chemokine receptor type 1                            | CCR1    |
| p53-binding protein Mdm-2                                | MDM2    |
| $\zeta$ opioid receptor                                  | SIGMAR1 |
| Muscarinic acetylcholine receptor M4                     | CHRM4   |
| Potassium-transporting ATPase $\alpha$ chain 2           | ATP12A  |
| Prostanoid IP receptor                                   | PTGIR   |
| Protein kinase C $\gamma$                                | PRKCG   |
| Protein kinase C $\delta$                                | PRKCD   |
| Protein kinase C $\beta$                                 | PRKCB   |
| Protein kinase C $\epsilon$                              | PRKCE   |
| Protein kinase C $\theta$                                | PRKCQ   |
| Anti-estrogen binding site (AEBS)                        | DHCR7   |
| Fatty acid binding protein adipocyte                     | FABP4   |
| Fatty acid binding protein muscle                        | FABP3   |
| Fatty acid binding protein epidermal                     | FABP5   |
| Fatty acid-binding protein, liver                        | FABP1   |
| Prostaglandin E synthase                                 | PTGES   |
| T-cell protein-tyrosine phosphatase                      | PTPN2   |
| Adenosine A3 receptor                                    | ADORA3  |
| MAP kinase ERK1                                          | MAPK3   |
| Protein-tyrosine phosphatase 2C                          | PTPN11  |
| Aldo-keto reductase family 1 member B10                  | AKR1B10 |
| Voltage-gated potassium channel subunit Kv1.5            | KCNA5   |
| Acetyl-CoA carboxylase 2                                 | ACACB   |
| Receptor-type tyrosine-protein phosphatase F (LAR)       | PTPRF   |
| Phospholipase A2 group 1B                                | PLA2G1B |
| Low molecular weight phosphotyrosine protein phosphatase | ACP1    |
| $\beta$ -secretase 1                                     | BACE1   |
| Serotonin 2b (5-HT2b) receptor                           | HTR2B   |
| Platelet activating factor receptor                      | PTAFR   |
| Metabotropic glutamate receptor 2                        | GRM2    |

|          |                                                       |        |
|----------|-------------------------------------------------------|--------|
|          | Acyl-CoA desaturase                                   | SCD    |
|          | $\beta$ secretase 2                                   | BACE2  |
|          | Monoglyceride lipase                                  | MGLL   |
|          | Protein kinase C $\eta$                               | PRKCH  |
|          | Neurokinin 1 receptor (by homology)                   | TACR1  |
|          | Peroxisome proliferator-activated receptor $\alpha$   | PPARA  |
|          | Proteinase-activated receptor 1                       | F2R    |
|          | ALK tyrosine kinase receptor                          | ALK    |
|          | Insulin-like growth factor I receptor                 | IGF1R  |
|          | Tyrosine-protein kinase SRC                           | SRC    |
|          | Vascular endothelial growth factor receptor 2         | KDR    |
|          | Type-1 angiotensin II receptor (by homology)          | AGTR1  |
|          | DNA topoisomerase II $\alpha$                         | TOP2A  |
|          | Vasopressin V2 receptor                               | AVPR2  |
|          | Vasopressin V1a receptor                              | AVPR1A |
|          | Melatonin receptor 1A                                 | MTNR1A |
|          | Melatonin receptor 1B                                 | MTNR1B |
|          | Muscarinic acetylcholine receptor M5                  | CHRM5  |
|          | Interleukin-6 receptor subunit $\beta$                | IL6ST  |
|          | MAP kinase p38 $\alpha$                               | MAPK14 |
| Vanillin | Serine/threonine-protein kinase/endoribonuclease IRE1 | ERN1   |
|          | Carbonic anhydrase II                                 | CA2    |
|          | Carbonic anhydrase VII                                | CA7    |
|          | Carbonic anhydrase I                                  | CA1    |
|          | Carbonic anhydrase XII                                | CA12   |
|          | Carbonic anhydrase XIV                                | CA14   |
|          | Carbonic anhydrase IX                                 | CA9    |
|          | Carbonic anhydrase IV                                 | CA4    |
|          | Carbonic anhydrase III                                | CA3    |
|          | Carbonic anhydrase VI                                 | CA6    |
|          | Carbonic anhydrase VA                                 | CA5A   |
|          | Dual specificity phosphatase Cdc25B                   | CDC25B |
|          | Leukocyte common antigen                              | PTPRC  |
|          | Histone acetyltransferase p300                        | EP300  |
|          | Transthyretin                                         | TTR    |
|          | Arylamine N-acetyltransferase 1                       | NAT1   |
|          | Alkaline phosphatase placental-like                   | ALPG   |
|          | Phospholipase A-2-activating protein                  | PLAA   |
|          | Aldo-keto-reductase family 1 member C3                | AKR1C3 |
|          | Matrix metalloproteinase 1                            | MMP1   |
|          | Myoglobin                                             | MB     |

|  |                                                             |        |
|--|-------------------------------------------------------------|--------|
|  | Serine/threonine-protein kinase PIM1                        | PIM1   |
|  | Histone deacetylase 3                                       | HDAC3  |
|  | Angiotensin-converting enzyme (by homology)                 | ACE    |
|  | Acetylcholinesterase                                        | ACHE   |
|  | $\alpha$ -(1,3)-fucosyltransferase 7                        | FUT7   |
|  | Carbonic anhydrase VB                                       | CA5B   |
|  | Phosphodiesterase 5A                                        | PDE5A  |
|  | Hematopoietic cell protein-tyrosine phosphatase 70Z-PEP     | PTPN22 |
|  | Calcium-activated potassium channel subunit $\alpha$ -1     | KCNMA1 |
|  | Dual specificity protein phosphatase 1 (by homology)        | DUSP1  |
|  | Tyrosine-protein kinase FYN                                 | FYN    |
|  | Tyrosine-protein kinase LCK                                 | LCK    |
|  | PI3-kinase p110- $\delta$ subunit                           | PIK3CD |
|  | DNA-dependent protein kinase                                | PRKDC  |
|  | PI3-kinase p110- $\gamma$ subunit                           | PIK3CG |
|  | CDGSH iron-sulfur domain-containing protein 1               | CISD1  |
|  | Vascular cell adhesion protein 1                            | VCAM1  |
|  | Sodium/hydrogen exchanger 1                                 | SLC9A1 |
|  | Thiopurine S-methyltransferase                              | TPMT   |
|  | Catechol O-methyltransferase (by homology)                  | COMT   |
|  | Neuronal acetylcholine receptor protein $\alpha$ -7 subunit | CHRNA7 |
|  | Inosine-5'-monophosphate dehydrogenase 2                    | IMPDH2 |
|  | Myeloperoxidase                                             | MPO    |
|  | Matrix metalloproteinase 9                                  | MMP9   |
|  | Matrix metalloproteinase 2                                  | MMP2   |
|  | MAP kinase-interacting serine/threonine-protein kinase MNK1 | MKNK1  |
|  | Monoamine oxidase B                                         | MAOB   |
|  | Histone chaperone ASF1A                                     | ASF1A  |
|  | Tubulin $\beta$ -1 chain                                    | TUBB1  |
|  | Indoleamine 2,3-dioxygenase                                 | IDO1   |
|  | Metabotropic glutamate receptor 5                           | GRM5   |
|  | Histone deacetylase 6                                       | HDAC6  |
|  | Alkaline phosphatase, tissue-nonspecific isozyme            | ALPL   |
|  | Thymidylate synthase                                        | TYMS   |
|  | Hydroxycarboxylic acid receptor 2                           | HCAR2  |
|  | Matrix metalloproteinase 8                                  | MMP8   |
|  | Matrix metalloproteinase 3                                  | MMP3   |
|  | PI3-kinase p110- $\alpha$ subunit                           | PIK3CA |
|  | Adenylate cyclase type V                                    | ADCY5  |

|  |                                                             |          |
|--|-------------------------------------------------------------|----------|
|  | D-amino-acid oxidase                                        | DAO      |
|  | Cathepsin L                                                 | CTSL     |
|  | Serine/threonine-protein kinase PIM3                        | PIM3     |
|  | Amine oxidase, copper containing                            | AOC3     |
|  | c-Jun N-terminal kinase 2                                   | MAPK9    |
|  | Neprilysin (by homology)                                    | MME      |
|  | Heme oxygenase 1 (by homology)                              | HMOX1    |
|  | Protein kinase C $\mu$                                      | PRKD1    |
|  | Serine/threonine-protein kinase D2                          | PRKD2    |
|  | Protein-glutamine $\gamma$ -glutamyltransferase             | TGM2     |
|  | Poly [ADP-ribose] polymerase-1                              | PARP1    |
|  | Butyrylcholinesterase                                       | BCHE     |
|  | Plasminogen activator inhibitor-1                           | SERPINE1 |
|  | Fructose-1,6-bisphosphatase                                 | FBP1     |
|  | Cannabinoid receptor 1                                      | CNR1     |
|  | Cannabinoid receptor 2                                      | CNR2     |
|  | DNA polymerase $\alpha$ subunit                             | POLA1    |
|  | DNA polymerase $\beta$                                      | POLB     |
|  | Induced myeloid leukemia cell differentiation protein Mcl-1 | MCL1     |
|  | Histone deacetylase 8                                       | HDAC8    |
|  | Methionine aminopeptidase 1                                 | METAP1   |
|  | Leucine-rich repeat serine/threonine-protein kinase 2       | LRRK2    |
|  | Lysine-specific demethylase 5C                              | KDM5C    |
|  | Lysine-specific demethylase 4B                              | KDM4B    |
|  | Lysine-specific demethylase 5B                              | KDM5B    |
|  | Lysine-specific demethylase 4A                              | KDM4A    |
|  | Muscarinic acetylcholine receptor M1 (by homology)          | CHRM1    |
|  | Steroid 5- $\alpha$ -reductase 2                            | SRD5A2   |
|  | Aldehyde dehydrogenase 1A1                                  | ALDH1A1  |
|  | Acyl coenzyme A:cholesterol acyltransferase                 | CES1     |
|  | Histone deacetylase 5                                       | HDAC5    |
|  | Histone deacetylase 7                                       | HDAC7    |
|  | MAP kinase ERK2                                             | MAPK1    |
|  | Cathepsin (V and K)                                         | CTSV     |
|  | Serum albumin                                               | ALB      |
|  | HMG-CoA reductase                                           | HMGCR    |
|  | Prostaglandin E synthase                                    | PTGES    |
|  | Tyrosine-protein kinase ABL                                 | ABL1     |
|  | Death-associated protein kinase 3                           | DAPK3    |
|  | Tyrosine-protein kinase SRC                                 | SRC      |

|               |                                                      |          |
|---------------|------------------------------------------------------|----------|
| Palmitic Acid | Fatty acid binding protein adipocyte                 | FABP4    |
|               | Peroxisome proliferator-activated receptor $\alpha$  | PPARA    |
|               | Fatty acid binding protein muscle                    | FABP3    |
|               | Fatty acid binding protein epidermal                 | FABP5    |
|               | Peroxisome proliferator-activated receptor $\delta$  | PPARD    |
|               | Fatty acid binding protein intestinal                | FABP2    |
|               | Free fatty acid receptor 1                           | FFAR1    |
|               | Solute carrier family 22 member 6 (by homology)      | SLC22A6  |
|               | Dual specificity phosphatase Cdc25A                  | CDC25A   |
|               | 11- $\beta$ -hydroxysteroid dehydrogenase 1          | HSD11B1  |
|               | Aldo-keto reductase family 1 member B10              | AKR1B10  |
|               | DNA polymerase $\beta$                               | POLB     |
|               | Vitamin D receptor                                   | VDR      |
|               | Bile acid receptor FXR                               | NR1H4    |
|               | Histone lysine demethylase PHF8                      | PHF8     |
|               | UDP-glucuronosyltransferase 2B7                      | UGT2B7   |
|               | Cytochrome P450 19A1                                 | CYP19A1  |
|               | Corticosteroid binding globulin                      | SERPINA6 |
|               | Testis-specific androgen-binding protein             | SHBG     |
|               | Estradiol 17- $\beta$ -dehydrogenase 3               | HSD17B3  |
|               | Glucose-6-phosphate 1-dehydrogenase                  | G6PD     |
|               | GABA-B receptor (by homology)                        | GABBR1   |
|               | Prostanoid EP2 receptor                              | PTGER2   |
|               | Lysine-specific demethylase 2A                       | KDM2A    |
|               | Lysine-specific demethylase 5C                       | KDM5C    |
|               | G-protein coupled bile acid receptor 1               | GPBAR1   |
|               | Niemann-Pick C1-like protein 1                       | NPC1L1   |
|               | GABA A receptor $\alpha$ -2/ $\beta$ -2/ $\gamma$ -2 | GABRA2   |
|               | Protein farnesyltransferase                          | FNTA     |
|               | Androgen Receptor                                    | AR       |
|               | Hydroxyacid oxidase 1                                | HAO1     |
|               | Prostanoid FP receptor                               | PTGFR    |
|               | Protein-tyrosine phosphatase 1B                      | PTPN1    |
|               | 11- $\beta$ -hydroxysteroid dehydrogenase 2          | HSD11B2  |
|               | Glutathione S-transferase $\kappa$ 1                 | GSTK1    |
|               | Leukotriene A4 hydrolase                             | LTA4H    |
|               | Carbonic anhydrase II                                | CA2      |
|               | Carbonic anhydrase I                                 | CA1      |
|               | Nuclear receptor subfamily 0 group B member 2        | NR0B2    |
|               | CDC45-related protein                                | CDC45    |
|               | Leukocyte common antigen                             | PTPRC    |
|               | Peroxisome proliferator-activated receptor $\gamma$  | PPARG    |

|  |                                                                            |          |
|--|----------------------------------------------------------------------------|----------|
|  | Cytochrome P450 26A1                                                       | CYP26A1  |
|  | Retinoid X receptor $\alpha$                                               | RXRA     |
|  | Retinoic acid receptor $\gamma$                                            | RARG     |
|  | Retinoic acid receptor $\beta$                                             | RARB     |
|  | Retinoic acid receptor $\alpha$                                            | RARA     |
|  | Anandamide amidohydrolase                                                  | FAAH     |
|  | Telomerase reverse transcriptase                                           | TERT     |
|  | Fatty acid-binding protein, liver                                          | FABP1    |
|  | Cytochrome P450 26B1                                                       | CYP26B1  |
|  | Retinoid X receptor $\gamma$ (by homology)                                 | RXRG     |
|  | G-protein coupled receptor 120                                             | FFAR4    |
|  | Voltage-gated calcium channel $\alpha 2/\delta$ subunit 1                  | CACNA2D1 |
|  | Retinoid X receptor $\beta$                                                | RXRB     |
|  | Monocarboxylate transporter 1 (by homology)                                | SLC16A1  |
|  | Arachidonate 15-lipoxygenase                                               | ALOX15   |
|  | Arachidonate 12-lipoxygenase                                               | ALOX12   |
|  | Prostanoid EP4 receptor                                                    | PTGER4   |
|  | Glycine receptor subunit $\alpha$ -1                                       | GLRA1    |
|  | Epoxide hydratase                                                          | EPHX2    |
|  | Multidrug resistance-associated protein 1                                  | ABCC1    |
|  | P-glycoprotein 1                                                           | ABCB1    |
|  | Neuronal acetylcholine receptor protein $\alpha$ -7 subunit (by homology)  | CHRNA7   |
|  | Cytosolic phospholipase A2                                                 | PLA2G4A  |
|  | Prostaglandin E synthase                                                   | PTGES    |
|  | Acyl-CoA desaturase                                                        | SCD      |
|  | SUMO-activating enzyme                                                     | SAE1     |
|  | Metabotropic glutamate receptor 5                                          | GRM5     |
|  | Plasminogen                                                                | PLG      |
|  | Serotonin 2b (5-HT2b) receptor                                             | HTR2B    |
|  | Nuclear receptor ROR- $\beta$                                              | RORB     |
|  | MAP kinase ERK2                                                            | MAPK1    |
|  | Nuclear receptor ROR- $\alpha$                                             | RORA     |
|  | G protein-coupled receptor 44                                              | PTGDR2   |
|  | Intercellular adhesion molecule (ICAM-1), Integrin $\alpha$ -L/ $\beta$ -2 | ITGAL    |
|  | Thromboxane A2 receptor                                                    | TBXA2R   |
|  | Hepatocyte nuclear factor 4- $\alpha$                                      | HNF4A    |
|  | Matrix metalloproteinase 2                                                 | MMP2     |
|  | Aldo-keto reductase family 1 member C1                                     | AKR1C1   |
|  | HMG-CoA reductase                                                          | HMGCR    |
|  | Autotaxin                                                                  | ENPP2    |
|  | Progesterone receptor                                                      | PGR      |

|         |                                                                  |          |
|---------|------------------------------------------------------------------|----------|
|         | Transient receptor potential cation channel subfamily A member 1 | TRPA1    |
|         | Methionine aminopeptidase 1                                      | METAP1   |
|         | Plasma retinol-binding protein                                   | RBP4     |
|         | Glucagon                                                         | GCG      |
|         | Steryl-sulfatase                                                 | STS      |
|         | Prostanoid DP receptor                                           | PTGDR    |
|         | $\gamma$ -secretase                                              | PSEN2    |
|         | Leukocyte adhesion glycoprotein LFA-1 $\alpha$                   | ITGAL    |
|         | AMPK $\alpha 2/\beta 1/\gamma 1$                                 | PRKAG1   |
|         | Thyroid hormone receptor $\alpha$                                | THRA     |
|         | Thyroid hormone receptor $\beta$ -1                              | THRB     |
|         | Neprilysin (by homology)                                         | MME      |
|         | Prostanoid EP3 receptor                                          | PTGER3   |
|         | Diacylglycerol O-acyltransferase 1                               | DGAT1    |
|         | $\alpha$ -2b adrenergic receptor                                 | ADRA2B   |
|         | MAP kinase p38 $\alpha$                                          | MAPK14   |
|         | Prostaglandin E synthase 2                                       | PTGES2   |
| Sucrose | Cyclin-dependent kinase 1                                        | CDK1     |
|         | Heat shock protein HSP 90- $\alpha$                              | HSP90AA1 |
|         | Vascular endothelial growth factor A                             | VEGFA    |
|         | $\gamma$ -secretase                                              | PSEN2    |
|         | Acidic fibroblast growth factor                                  | FGF1     |
|         | Heparanase                                                       | HPSE     |
|         | Basic fibroblast growth factor                                   | FGF2     |
|         | Galectin-4                                                       | LGALS4   |
|         | Galectin-3                                                       | LGALS3   |
|         | Galectin-8                                                       | LGALS8   |
|         | Serotonin 2b (5-HT2b) receptor                                   | HTR2B    |
|         | $\alpha$ -2a adrenergic receptor                                 | ADRA2A   |
|         | Adrenergic receptor $\alpha$ -2                                  | ADRA2C   |
|         | $\alpha$ -2b adrenergic receptor                                 | ADRA2B   |
|         | Dopamine D1 receptor                                             | DRD1     |
|         | Dopamine D2 receptor                                             | DRD2     |
|         | $\alpha$ -1d adrenergic receptor                                 | ADRA1D   |
|         | Serotonin 2a (5-HT2a) receptor                                   | HTR2A    |
|         | Serotonin 2c (5-HT2c) receptor                                   | HTR2C    |
|         | Dopamine D3 receptor                                             | DRD3     |
|         | Cytochrome P450 2D6                                              | CYP2D6   |
|         | Serotonin 6 (5-HT6) receptor                                     | HTR6     |
|         | $\alpha$ -1a adrenergic receptor (by homology)                   | ADRA1A   |
|         | Serotonin 1b (5-HT1b) receptor (by homology)                     | HTR1B    |

|  |                                                    |         |
|--|----------------------------------------------------|---------|
|  | Glutamate carboxypeptidase II                      | FOLH1   |
|  | Nuclear receptor ROR- $\gamma$                     | RORC    |
|  | Vanilloid receptor                                 | TRPV1   |
|  | Signal transducer and activator of transcription 3 | STAT3   |
|  | Liver glycogen phosphorylase                       | PYGL    |
|  | Muscle glycogen phosphorylase                      | PYGM    |
|  | Brain glycogen phosphorylase                       | PYGB    |
|  | Adenosylhomocysteinase (by homology)               | AHCY    |
|  | $\kappa$ Opioid receptor                           | OPRK1   |
|  | Carbonic anhydrase II                              | CA2     |
|  | Carbonic anhydrase I                               | CA1     |
|  | Carbonic anhydrase IX                              | CA9     |
|  | Interleukin-2                                      | IL2     |
|  | NAALADase II                                       | NAALAD2 |
|  | Sodium channel protein type IX $\alpha$ subunit    | SCN9A   |
|  | Trehalase                                          | TREH    |
|  | Carbonic anhydrase XII                             | CA12    |
|  | Glycine receptor subunit $\alpha$ -1               | GLRA1   |
|  | Glycine receptor subunit $\alpha$ -2               | GLRA2   |
|  | $\gamma$ -glutamyl hydrolase                       | GGH     |
|  | Somatostatin receptor 5                            | SSTR5   |
|  | Somatostatin receptor 2                            | SSTR2   |
|  | Somatostatin receptor 4                            | SSTR4   |
|  | Somatostatin receptor 1                            | SSTR1   |
|  | Somatostatin receptor 3                            | SSTR3   |
|  | Sialidase 3                                        | NEU3    |
|  | Sialidase 2                                        | NEU2    |
|  | Sialidase 4                                        | NEU4    |
|  | Bifunctional protein NCOAT                         | OGA     |
|  | Endothelin-converting enzyme 1                     | ECE1    |
|  | Vitamin D receptor                                 | VDR     |
|  | Pancreatic $\alpha$ -amylase                       | AMY2A   |
|  | Maltase-glucoamylase                               | MGAM    |
|  | Sucrase-isomaltase                                 | SI      |
|  | Platelet activating factor receptor (by homology)  | PTAFR   |
|  | Kynurenine 3-monooxygenase (by homology)           | KMO     |
|  | Insulin-like growth factor II receptor             | IGF2R   |
|  | Apoptosis regulator Bcl-X                          | BCL2L1  |
|  | Adenosine A2a receptor (by homology)               | ADORA2A |
|  | Adenosine A1 receptor (by homology)                | ADORA1  |
|  | Carbonic anhydrase VII                             | CA7     |
|  | Carbonic anhydrase VI                              | CA6     |

|               |                                                        |         |
|---------------|--------------------------------------------------------|---------|
|               | Carbonic anhydrase XIV                                 | CA14    |
|               | Carbonic anhydrase IV                                  | CA4     |
|               | Carbonic anhydrase XIII                                | CA13    |
|               | Carbonic anhydrase VB                                  | CA5B    |
|               | Carbonic anhydrase VA                                  | CA5A    |
|               | Adenosine deaminase                                    | ADA     |
|               | Adenosine A3 receptor                                  | ADORA3  |
|               | Protein phosphatase 2C $\alpha$                        | PPM1A   |
|               | Aldose reductase                                       | AKR1B1  |
|               | Leucine aminopeptidase                                 | LAP3    |
|               | Motilin receptor                                       | MLNR    |
|               | HERG                                                   | KCNH2   |
|               | $\mu$ opioid receptor                                  | OPRM1   |
|               | Caspase-3                                              | CASP3   |
|               | Aldo-keto-reductase family 1 member C3                 | AKR1C3  |
|               | Tyrosinase                                             | TYR     |
|               | $\alpha$ -L-fucosidase I                               | FUCA1   |
|               | Fructose-1,6-bisphosphatase                            | FBP1    |
|               | Angiotensin-converting enzyme                          | ACE     |
|               | Thiopurine S-methyltransferase                         | TPMT    |
|               | $\beta$ -glucocerebrosidase                            | GBA     |
|               | Thymidylate kinase                                     | DTYMK   |
|               | Hexokinase type II                                     | HK2     |
|               | Hexokinase type I                                      | HK1     |
|               | Cytidine deaminase (by homology)                       | CDA     |
|               | Squalene synthetase (by homology)                      | FDFT1   |
|               | Galectin-9                                             | LGALS9  |
|               | Norepinephrine transporter                             | SLC6A2  |
|               | 11- $\beta$ -hydroxysteroid dehydrogenase 2            | HSD11B2 |
|               | 11- $\beta$ -hydroxysteroid dehydrogenase 1            | HSD11B1 |
|               | Sodium/potassium-transporting ATPase $\alpha$ -1 chain | ATP1A1  |
|               | P-glycoprotein 1                                       | ABCB1   |
|               | Bile salt export pump                                  | ABCB11  |
|               | Protein kinase C $\gamma$                              | PRKCG   |
| Succinic Acid | Egl nine homolog 1                                     | EGLN1   |
|               | Histone deacetylase 3                                  | HDAC3   |
|               | Histone lysine demethylase PHF8                        | PHF8    |
|               | ATP-citrate synthase                                   | ACLY    |
|               | Protein farnesyltransferase                            | FNTA    |
|               | GABA transporter 1                                     | SLC6A1  |
|               | GABA-A receptor; $\alpha$ -1/ $\beta$ -2/ $\gamma$ -2  | GABRA1  |
|               | GABA A receptor $\alpha$ -3/ $\beta$ -2/ $\gamma$ -2   | GABRA3  |

|                                                                           |         |
|---------------------------------------------------------------------------|---------|
| GABA A receptor $\alpha$ -2/ $\beta$ -2/ $\gamma$ -2                      | GABRA2  |
| GABA-B receptor                                                           | GABBR2  |
| GABA receptor $\rho$ -1 subunit                                           | GABRR1  |
| GABA transporter 3                                                        | SLC6A11 |
| Solute carrier family 22 member 6 (by homology)                           | SLC22A6 |
| GABA transporter 2 (by homology)                                          | SLC6A13 |
| Hydroxyacid oxidase 1                                                     | HAO1    |
| Fatty acid binding protein adipocyte                                      | FABP4   |
| Peroxisome proliferator-activated receptor $\alpha$                       | PPARA   |
| Fatty acid binding protein muscle                                         | FABP3   |
| Fatty acid binding protein epidermal                                      | FABP5   |
| Peroxisome proliferator-activated receptor $\delta$                       | PPARD   |
| Free fatty acid receptor 1                                                | FFAR1   |
| Fatty acid binding protein intestinal                                     | FABP2   |
| HMG-CoA reductase                                                         | HMGCR   |
| 11- $\beta$ -hydroxysteroid dehydrogenase 1                               | HSD11B1 |
| Prostanoid EP2 receptor                                                   | PTGER2  |
| Prostanoid FP receptor                                                    | PTGFR   |
| Neuronal acetylcholine receptor protein $\alpha$ -7 subunit (by homology) | CHRNA7  |
| Squalene synthetase (by homology)                                         | FDFT1   |
| Androgen Receptor                                                         | AR      |
| Vitamin D receptor                                                        | VDR     |
| Niemann-Pick C1-like protein 1                                            | NPC1L1  |
| Bile acid receptor FXR                                                    | NR1H4   |
| Dual specificity phosphatase Cdc25A                                       | CDC25A  |
| G-protein coupled bile acid receptor 1                                    | GPBAR1  |
| Aldo-keto reductase family 1 member B10                                   | AKR1B10 |
| DNA polymerase $\beta$ (by homology)                                      | POLB    |
| Lysine-specific demethylase 3A                                            | KDM3A   |
| $\alpha$ -ketoglutarate-dependent dioxygenase FTO                         | FTO     |
| Lysine-specific demethylase 5A                                            | KDM5A   |
| Hypoxia-inducible factor prolyl hydroxylase 1                             | EGLN2   |
| Lysine-specific demethylase 5B                                            | KDM5B   |
| Egl nine homolog 3                                                        | EGLN3   |
| Lysine-specific demethylase 4A                                            | KDM4A   |
| Hypoxia-inducible factor 1- $\alpha$ inhibitor                            | HIF1AN  |
| Lysine-specific demethylase 4D                                            | KDM4D   |
| Lysine-specific demethylase 4C                                            | KDM4C   |
| Carbonic anhydrase I                                                      | CA1     |
| Carbonic anhydrase IX                                                     | CA9     |
| Aminopeptidase B                                                          | RNPEP   |

|            |                                                                                      |          |
|------------|--------------------------------------------------------------------------------------|----------|
|            | UDP-glucuronosyltransferase 2B7                                                      | UGT2B7   |
|            | Lysine-specific demethylase 6B                                                       | KDM6B    |
|            | Glutamate carboxypeptidase II                                                        | FOLH1    |
|            | Cytochrome P450 19A1                                                                 | CYP19A1  |
|            | Corticosteroid binding globulin                                                      | SERPINA6 |
|            | Testis-specific androgen-binding protein                                             | SHBG     |
|            | Estradiol 17- $\beta$ -dehydrogenase 3                                               | HSD17B3  |
|            | Glucose-6-phosphate 1-dehydrogenase                                                  | G6PD     |
|            | GABA-B receptor (by homology)                                                        | GABBR1   |
|            | Lysine-specific demethylase 2A                                                       | KDM2A    |
|            | Lysine-specific demethylase 5C                                                       | KDM5C    |
|            | Angiotensin-converting enzyme (by homology)                                          | ACE      |
|            | Lysine-specific demethylase 4D-like                                                  | KDM4E    |
| Alexandrin | Interleukin-2                                                                        | IL2      |
|            | Signal transducer and activator of transcription 3                                   | STAT3    |
|            | Sphingosine 1-phosphate receptor Edg-3                                               | S1PR3    |
|            | Sphingosine 1-phosphate receptor Edg-1                                               | S1PR1    |
|            | $\gamma$ -secretase                                                                  | PSEN2    |
|            | Sphingosine 1-phosphate receptor Edg-8                                               | S1PR5    |
|            | Sphingosine 1-phosphate receptor Edg-6                                               | S1PR4    |
|            | Plasma retinol-binding protein                                                       | RBP4     |
|            | Platelet activating factor receptor                                                  | PTAFR    |
|            | 6-phosphofructo-2-kinase/fructose-2,6-bisphosphatase 3                               | PFKFB3   |
|            | Vascular endothelial growth factor receptor 1                                        | FLT1     |
|            | Hepatocyte growth factor receptor                                                    | MET      |
|            | Protein phosphatase 2C $\beta$                                                       | PPM1B    |
|            | Serine/threonine protein phosphatase PP1- $\gamma$ catalytic subunit                 | PPP1CC   |
|            | Serine/threonine protein phosphatase 2A, catalytic subunit, $\alpha$ isoform         | PPP2CA   |
|            | Serine/threonine protein phosphatase 2A, 56 kDa regulatory subunit, $\alpha$ isoform | PPP2R5A  |
|            | Arachidonate 5-lipoxygenase                                                          | ALOX5    |
|            | 11- $\beta$ -hydroxysteroid dehydrogenase 2                                          | HSD11B2  |
|            | Transitional endoplasmic reticulum ATPase                                            | VCP      |
|            | Protein-tyrosine phosphatase 1B                                                      | PTPN1    |
|            | Monoamine oxidase A                                                                  | MAOA     |
|            | Adenosine A1 receptor                                                                | ADORA1   |
|            | Adenosine A2b receptor                                                               | ADORA2B  |
|            | Adenosine A3 receptor                                                                | ADORA3   |
|            | MAP kinase p38 $\alpha$                                                              | MAPK14   |
|            | Dual specificity phosphatase Cdc25B (by                                              | CDC25B   |

|                                                                               |          |
|-------------------------------------------------------------------------------|----------|
| homology)                                                                     |          |
| Acetylcholinesterase                                                          | ACHE     |
| 15-hydroxyprostaglandin dehydrogenase [NAD+]                                  | HPGD     |
| C-X-C chemokine receptor type 3                                               | CXCR3    |
| Dopamine D4 receptor                                                          | DRD4     |
| Peroxisome proliferator-activated receptor $\alpha$                           | PPARA    |
| Glucose-dependent insulinotropic receptor                                     | GPR119   |
| Tyrosine-protein kinase JAK2                                                  | JAK2     |
| Histone deacetylase 6                                                         | HDAC6    |
| Acetyl-CoA carboxylase 2                                                      | ACACB    |
| T-cell protein-tyrosine phosphatase                                           | PTPN2    |
| Low molecular weight phosphotyrosine protein phosphatase                      | ACP1     |
| Macrophage colony stimulating factor receptor                                 | CSF1R    |
| Muscarinic acetylcholine receptor M4                                          | CHRM4    |
| Muscarinic acetylcholine receptor M5                                          | CHRM5    |
| Muscarinic acetylcholine receptor M2                                          | CHRM2    |
| Muscarinic acetylcholine receptor M1                                          | CHRM1    |
| Muscarinic acetylcholine receptor M3                                          | CHRM3    |
| Tyrosine-protein kinase receptor TYRO3                                        | TYRO3    |
| Acyl-CoA desaturase                                                           | SCD      |
| Niemann-Pick C1-like protein 1                                                | NPC1L1   |
| Cytochrome P450 2C9                                                           | CYP2C9   |
| Cytochrome P450 3A4                                                           | CYP3A4   |
| Cytochrome P450 2C19                                                          | CYP2C19  |
| Apoptosis regulator Bcl-X                                                     | BCL2L1   |
| Matrix metalloproteinase 13                                                   | MMP13    |
| Matrix metalloproteinase 1                                                    | MMP1     |
| ADAM17                                                                        | ADAM17   |
| Adrenergic receptor $\beta$                                                   | ADRB2    |
| $\beta$ -1 adrenergic receptor                                                | ADRB1    |
| $\beta$ -3 adrenergic receptor                                                | ADRB3    |
| Nuclear receptor ROR- $\gamma$                                                | RORC     |
| Bromodomain-containing protein 4                                              | BRD4     |
| Histone deacetylase 3                                                         | HDAC3    |
| Histone deacetylase 1                                                         | HDAC1    |
| 11- $\beta$ -hydroxysteroid dehydrogenase 1                                   | HSD11B1  |
| Intercellular adhesion molecule (ICAM-1),<br>Integrin $\alpha$ -L/ $\beta$ -2 | ITGAL    |
| Serine/threonine-protein kinase PLK1                                          | PLK1     |
| Fatty acid synthase                                                           | FASN     |
| Pyruvate dehydrogenase kinase isoform 1                                       | PDK1     |
| Heat shock protein HSP 90- $\alpha$                                           | HSP90AA1 |

|                       |                                                             |         |
|-----------------------|-------------------------------------------------------------|---------|
|                       | C-C chemokine receptor type 5                               | CCR5    |
|                       | Thymidylate synthase (by homology)                          | TYMS    |
|                       | Vascular endothelial growth factor A                        | VEGFA   |
|                       | Acidic fibroblast growth factor                             | FGF1    |
|                       | Basic fibroblast growth factor                              | FGF2    |
|                       | Heparanase                                                  | HPSE    |
|                       | Carbonic anhydrase I                                        | CA1     |
|                       | Renin                                                       | REN     |
|                       | Histone deacetylase 2                                       | HDAC2   |
|                       | p53-binding protein Mdm-2                                   | MDM2    |
|                       | Sodium/potassium-transporting ATPase $\alpha$ -1 chain      | ATP1A1  |
|                       | Protein-tyrosine phosphatase 2C                             | PTPN11  |
|                       | Epoxide hydratase                                           | EPHX2   |
|                       | Serotonin 4 (5-HT4) receptor                                | HTR4    |
|                       | Niemann-Pick C1 protein                                     | NPC1    |
|                       | Receptor protein-tyrosine kinase erbB-2                     | ERBB2   |
|                       | Epidermal growth factor receptor erbB1                      | EGFR    |
|                       | Serotonin 1a (5-HT1a) receptor                              | HTR1A   |
|                       | Serotonin transporter                                       | SLC6A4  |
|                       | Cathepsin L                                                 | CTSL    |
|                       | DNA polymerase $\alpha$ subunit                             | POLA1   |
|                       | Dual specificity mitogen-activated protein kinase kinase 1  | MAP2K1  |
|                       | Induced myeloid leukemia cell differentiation protein Mcl-1 | MCL1    |
|                       | Sodium channel protein type V $\alpha$ subunit              | SCN5A   |
|                       | Phosphodiesterase 4B                                        | PDE4B   |
|                       | Cytosolic phospholipase A2                                  | PLA2G4A |
|                       | Sodium channel protein type IX $\alpha$ subunit             | SCN9A   |
|                       | $\beta$ -secretase 1                                        | BACE1   |
|                       | Perforin-1                                                  | PRF1    |
|                       | Stem cell growth factor receptor                            | KIT     |
|                       | Tyrosine-protein kinase receptor FLT3                       | FLT3    |
|                       | Serine/threonine-protein kinase Aurora-B                    | AURKB   |
|                       | Serine/threonine-protein kinase Aurora-A                    | AURKA   |
|                       | Serine/threonine-protein kinase PIM1                        | PIM1    |
| P-Hydroxybenzaldehyde | Carbonic anhydrase II                                       | CA2     |
|                       | Carbonic anhydrase VII                                      | CA7     |
|                       | Carbonic anhydrase I                                        | CA1     |
|                       | Carbonic anhydrase III                                      | CA3     |
|                       | Carbonic anhydrase VI                                       | CA6     |
|                       | Carbonic anhydrase XII                                      | CA12    |
|                       | Carbonic anhydrase XIV                                      | CA14    |

|  |                                                               |         |
|--|---------------------------------------------------------------|---------|
|  | Carbonic anhydrase IX                                         | CA9     |
|  | Carbonic anhydrase IV                                         | CA4     |
|  | Carbonic anhydrase VB                                         | CA5B    |
|  | Carbonic anhydrase VA                                         | CA5A    |
|  | Carbonic anhydrase XIII (by homology)                         | CA13    |
|  | Serine/threonine-protein kinase/endoribonuclease IRE1         | ERN1    |
|  | Catechol O-methyltransferase (by homology)                    | COMT    |
|  | Acetylcholinesterase                                          | ACHE    |
|  | Succinate semialdehyde dehydrogenase                          | ALDH5A1 |
|  | Tyrosinase (by homology)                                      | TYR     |
|  | $\gamma$ -amino-N-butyrate transaminase                       | ABAT    |
|  | $\alpha$ -(1,3)-fucosyltransferase 7                          | FUT7    |
|  | Poly [ADP-ribose] polymerase-1                                | PARP1   |
|  | Estrogen receptor $\beta$                                     | ESR2    |
|  | Carboxylesterase 2                                            | CES2    |
|  | Estradiol 17- $\beta$ -dehydrogenase 1                        | HSD17B1 |
|  | D-amino-acid oxidase                                          | DAO     |
|  | Induced myeloid leukemia cell differentiation protein Mcl-1   | MCL1    |
|  | Dual-specificity tyrosine-phosphorylation regulated kinase 1A | DYRK1A  |
|  | Dual specificity protein kinase CLK1                          | CLK1    |
|  | Dual specificity tyrosine-phosphorylation-regulated kinase 1B | DYRK1B  |
|  | Steroid 5- $\alpha$ -reductase 2                              | SRD5A2  |
|  | Androgen Receptor (by homology)                               | AR      |
|  | Glycogen synthase kinase-3 $\beta$                            | GSK3B   |
|  | Estradiol 17- $\beta$ -dehydrogenase 3                        | HSD17B3 |
|  | Estrogen receptor $\alpha$                                    | ESR1    |
|  | Myeloperoxidase                                               | MPO     |
|  | Melatonin receptor 1A                                         | MTNR1A  |
|  | Fatty acid synthase                                           | FASN    |
|  | Serum albumin                                                 | ALB     |
|  | Estradiol 17- $\beta$ -dehydrogenase 2                        | HSD17B2 |
|  | Steryl-sulfatase                                              | STS     |
|  | Lysine-specific demethylase 4D-like                           | KDM4E   |
|  | L-lactate dehydrogenase A chain                               | LDHA    |
|  | L-lactate dehydrogenase B chain                               | LDHB    |
|  | Cannabinoid receptor 1                                        | CNR1    |
|  | Acyl coenzyme A:cholesterol acyltransferase                   | CES1    |
|  | Cannabinoid receptor 2                                        | CNR2    |
|  | Squalene monooxygenase (by homology)                          | SQLE    |

|  |                                                                  |          |
|--|------------------------------------------------------------------|----------|
|  | Serotonin 6 (5-HT6) receptor                                     | HTR6     |
|  | Estrogen-related receptor $\gamma$                               | ESRRG    |
|  | Monoamine oxidase B                                              | MAOB     |
|  | Arachidonate 5-lipoxygenase                                      | ALOX5    |
|  | GABA-A receptor; $\alpha$ -1/ $\beta$ -2/ $\gamma$ -2            | GABRA1   |
|  | Cyclin-dependent kinase 1                                        | CDK1     |
|  | Aldo-keto reductase family 1 member C2                           | AKR1C2   |
|  | Aldo-keto reductase family 1 member C1                           | AKR1C1   |
|  | Corticotropin releasing factor receptor 1                        | CRHR1    |
|  | Serotonin 2b (5-HT2b) receptor                                   | HTR2B    |
|  | GABA-A receptor; $\alpha$ -1/ $\beta$ -3/ $\gamma$ -2            | GABRB3   |
|  | Cyclooxygenase-1                                                 | PTGS1    |
|  | Norepinephrine transporter                                       | SLC6A2   |
|  | Serotonin 2c (5-HT2c) receptor                                   | HTR2C    |
|  | Dopamine D3 receptor                                             | DRD3     |
|  | Apoptosis regulator Bcl-2                                        | BCL2     |
|  | Retinoic acid receptor $\gamma$                                  | RARG     |
|  | Retinoic acid receptor $\beta$                                   | RARB     |
|  | Aldo-keto-reductase family 1 member C3                           | AKR1C3   |
|  | Testis-specific androgen-binding protein                         | SHBG     |
|  | Transient receptor potential cation channel subfamily A member 1 | TRPA1    |
|  | Insulin-like growth factor I receptor                            | IGF1R    |
|  | Leukocyte elastase                                               | ELANE    |
|  | ALK tyrosine kinase receptor                                     | ALK      |
|  | Glutathione S-transferase A1                                     | GSTA1    |
|  | Indoleamine 2,3-dioxygenase                                      | IDO1     |
|  | Monoamine oxidase A                                              | MAOA     |
|  | Arachidonate 15-lipoxygenase                                     | ALOX15   |
|  | Cystic fibrosis transmembrane conductance regulator              | CFTR     |
|  | Apoptosis regulator Bcl-X                                        | BCL2L1   |
|  | G protein-coupled receptor 44                                    | PTGDR2   |
|  | Aldehyde dehydrogenase                                           | ALDH2    |
|  | Coagulation factor VII/tissue factor                             | F3       |
|  | Protein-tyrosine phosphatase 1B                                  | PTPN1    |
|  | G-protein coupled receptor 35                                    | GPR35    |
|  | Thymidylate synthase                                             | TYMS     |
|  | Cyclooxygenase-2                                                 | PTGS2    |
|  | Plasminogen activator inhibitor-1                                | SERPINE1 |
|  | Dipeptidyl peptidase IV                                          | DPP4     |
|  | $\alpha$ -2a adrenergic receptor                                 | ADRA2A   |
|  | Adrenergic receptor $\alpha$ -2                                  | ADRA2C   |

|             |                                                                           |         |
|-------------|---------------------------------------------------------------------------|---------|
|             | $\alpha$ -2b adrenergic receptor                                          | ADRA2B  |
|             | Muscarinic acetylcholine receptor M2                                      | CHRM2   |
|             | Muscarinic acetylcholine receptor M1                                      | CHRM1   |
|             | Serotonin transporter                                                     | SLC6A4  |
|             | Neurokinin 2 receptor                                                     | TACR2   |
|             | Dopamine transporter                                                      | SLC6A3  |
|             | Muscarinic acetylcholine receptor M3                                      | CHRM3   |
|             | $\beta$ -3 adrenergic receptor                                            | ADRB3   |
|             | Adenosine A3 receptor                                                     | ADORA3  |
|             | Trace amine-associated receptor 1 (by homology)                           | TAAR1   |
|             | Transthyretin                                                             | TTR     |
| Citric Acid | ATP-citrate synthase                                                      | ACLY    |
|             | Squalene synthetase (by homology)                                         | FDFT1   |
|             | Neuronal acetylcholine receptor protein $\alpha$ -7 subunit (by homology) | CHRNA7  |
|             | Egl nine homolog 1                                                        | EGLN1   |
|             | HMG-CoA reductase                                                         | HMGCR   |
|             | Solute carrier family 22 member 6 (by homology)                           | SLC22A6 |
|             | Protein farnesyltransferase                                               | FNTA    |
|             | Excitatory amino acid transporter 3                                       | SLC1A1  |
|             | Prostanoid EP2 receptor                                                   | PTGER2  |
|             | Prostanoid FP receptor                                                    | PTGFR   |
|             | Niemann-Pick C1-like protein 1                                            | NPC1L1  |
|             | Hydroxyacid oxidase 1                                                     | HAO1    |
|             | Lysine-specific demethylase 2A                                            | KDM2A   |
|             | Histone lysine demethylase PHF8                                           | PHF8    |
|             | Lysine-specific demethylase 5C                                            | KDM5C   |
|             | Metabotropic glutamate receptor 3                                         | GRM3    |
|             | Metabotropic glutamate receptor 2                                         | GRM2    |
|             | Glutamate receptor ionotropic kainate 1                                   | GRIK1   |
|             | Glutamate receptor ionotropic, AMPA 1                                     | GRIA1   |
|             | Adenosine A3 receptor                                                     | ADORA3  |
|             | Glutamate receptor ionotropic kainate 5                                   | GRIK5   |
|             | Metabotropic glutamate receptor 4                                         | GRM4    |
|             | Glutamate receptor ionotropic, AMPA 4                                     | GRIA4   |
|             | Metabotropic glutamate receptor 5                                         | GRM5    |
|             | Metabotropic glutamate receptor 8                                         | GRM8    |
|             | Glutamate receptor ionotropic kainate 2                                   | GRIK2   |
|             | Glutamate receptor ionotropic kainate 3                                   | GRIK3   |
|             | Metabotropic glutamate receptor 1                                         | GRM1    |
|             | Metabotropic glutamate receptor 7                                         | GRM7    |
|             | Glutamate receptor ionotropic, AMPA 2                                     | GRIA2   |

|                           |                                                                 |          |
|---------------------------|-----------------------------------------------------------------|----------|
|                           | Metabotropic glutamate receptor 6                               | GRM6     |
|                           | UDP-glucuronosyltransferase 2B7                                 | UGT2B7   |
|                           | Glutamate carboxypeptidase II                                   | FOLH1    |
|                           | 6-phosphogluconate dehydrogenase                                | PGD      |
|                           | Fatty acid binding protein adipocyte                            | FABP4    |
|                           | Peroxisome proliferator-activated receptor $\alpha$             | PPARA    |
|                           | Fatty acid binding protein muscle                               | FABP3    |
|                           | Fatty acid binding protein epidermal                            | FABP5    |
|                           | Peroxisome proliferator-activated receptor $\delta$             | PPARD    |
|                           | Free fatty acid receptor 1                                      | FFAR1    |
|                           | Fatty acid binding protein intestinal                           | FABP2    |
|                           | Bile acid receptor FXR                                          | NR1H4    |
|                           | Glucose-6-phosphate 1-dehydrogenase                             | G6PD     |
|                           | G-protein coupled bile acid receptor 1                          | GPBAR1   |
|                           | Carnitine O-palmitoyltransferase 1, liver isoform (by homology) | CPT1A    |
|                           | 11- $\beta$ -hydroxysteroid dehydrogenase 1                     | HSD11B1  |
|                           | 11- $\beta$ -hydroxysteroid dehydrogenase 2                     | HSD11B2  |
|                           | Androgen Receptor                                               | AR       |
|                           | Vitamin D receptor                                              | VDR      |
|                           | Cytochrome P450 19A1                                            | CYP19A1  |
|                           | GABA A receptor $\alpha$ -2/ $\beta$ -2/ $\gamma$ -2            | GABRA2   |
|                           | Dual specificity phosphatase Cdc25A                             | CDC25A   |
|                           | Aldo-keto reductase family 1 member B10                         | AKR1B10  |
|                           | DNA polymerase $\beta$ (by homology)                            | POLB     |
|                           | Histone deacetylase 3                                           | HDAC3    |
|                           | Excitatory amino acid transporter 2                             | SLC1A2   |
|                           | Carbonic anhydrase I                                            | CA1      |
|                           | Carbonic anhydrase IX                                           | CA9      |
|                           | Aminopeptidase B                                                | RNPEP    |
|                           | Prostaglandin E synthase                                        | PTGES    |
|                           | Corticosteroid binding globulin                                 | SERPINA6 |
|                           | Testis-specific androgen-binding protein                        | SHBG     |
|                           | Estradiol 17- $\beta$ -dehydrogenase 3                          | HSD17B3  |
|                           | GABA-B receptor (by homology)                                   | GABBR1   |
| Bis(4-Hydroxybenzyl)Ether | Estrogen receptor $\beta$                                       | ESR2     |
|                           | Carbonic anhydrase II                                           | CA2      |
|                           | Carbonic anhydrase I                                            | CA1      |
|                           | Carbonic anhydrase IX                                           | CA9      |
|                           | Carbonic anhydrase XIV                                          | CA14     |
|                           | Estrogen receptor $\alpha$                                      | ESR1     |
|                           | Carbonic anhydrase VII                                          | CA7      |

|  |                                                               |          |
|--|---------------------------------------------------------------|----------|
|  | Carbonic anhydrase XII                                        | CA12     |
|  | Dual-specificity tyrosine-phosphorylation regulated kinase 1A | DYRK1A   |
|  | Dual specificity protein kinase CLK1                          | CLK1     |
|  | Dual specificity tyrosine-phosphorylation-regulated kinase 1B | DYRK1B   |
|  | Solute carrier family 22 member 12                            | SLC22A12 |
|  | Adenosine A1 receptor                                         | ADORA1   |
|  | Adenosine A2a receptor                                        | ADORA2A  |
|  | Adenosine A2b receptor                                        | ADORA2B  |
|  | Induced myeloid leukemia cell differentiation protein Mcl-1   | MCL1     |
|  | Cyclin-dependent kinase 2                                     | CDK2     |
|  | Squalene monooxygenase (by homology)                          | SQLE     |
|  | G protein-coupled receptor kinase 6                           | GRK6     |
|  | Protein-tyrosine phosphatase 1B                               | PTPN1    |
|  | Cyclooxygenase-2                                              | PTGS2    |
|  | Endothelin receptor ET-A                                      | EDNRA    |
|  | PI3-kinase p110- $\gamma$ subunit                             | PIK3CG   |
|  | PI3-kinase p110- $\alpha$ subunit                             | PIK3CA   |
|  | Urokinase-type plasminogen activator                          | PLAU     |
|  | c-Jun N-terminal kinase 2                                     | MAPK9    |
|  | Neuronal acetylcholine receptor protein $\alpha$ -7 subunit   | CHRNA7   |
|  | Serine/threonine-protein kinase Chk1                          | CHEK1    |
|  | Serine/threonine-protein kinase WEE1                          | WEE1     |
|  | Histone deacetylase 3                                         | HDAC3    |
|  | Tyrosine-protein kinase ABL                                   | ABL1     |
|  | Histone deacetylase 6                                         | HDAC6    |
|  | Histone deacetylase 2                                         | HDAC2    |
|  | PI3-kinase p110- $\delta$ subunit                             | PIK3CD   |
|  | DNA-dependent protein kinase                                  | PRKDC    |
|  | Tyrosine-protein kinase HCK                                   | HCK      |
|  | Histone deacetylase 1                                         | HDAC1    |
|  | Endothelin receptor ET-B                                      | EDNRB    |
|  | Metabotropic glutamate receptor 5                             | GRM5     |
|  | Glycogen synthase kinase-3 $\beta$                            | GSK3B    |
|  | Catechol O-methyltransferase                                  | COMT     |
|  | $\beta$ -secretase 1                                          | BACE1    |
|  | Norepinephrine transporter                                    | SLC6A2   |
|  | Tyrosine-protein kinase receptor FLT3                         | FLT3     |
|  | Matrix metalloproteinase 9                                    | MMP9     |
|  | Matrix metalloproteinase 1                                    | MMP1     |

|  |                                                                                     |         |
|--|-------------------------------------------------------------------------------------|---------|
|  | Matrix metalloproteinase 2                                                          | MMP2    |
|  | ADAM17                                                                              | ADAM17  |
|  | Matrix metalloproteinase 8                                                          | MMP8    |
|  | Matrix metalloproteinase 13                                                         | MMP13   |
|  | C-C chemokine receptor type 9                                                       | CCR9    |
|  | Serine/threonine-protein kinase mTOR                                                | MTOR    |
|  | Neprilysin                                                                          | MME     |
|  | Matrix metalloproteinase 3                                                          | MMP3    |
|  | Matrix metalloproteinase 14                                                         | MMP14   |
|  | Phenylethanolamine N-methyltransferase                                              | PNMT    |
|  | Neuropeptide Y receptor type 5                                                      | NPY5R   |
|  | Glucagon receptor (by homology)                                                     | GCGR    |
|  | 14-3-3 protein $\gamma$                                                             | YWHAG   |
|  | Dual specificity phosphatase Cdc25A                                                 | CDC25A  |
|  | Dual specificity phosphatase Cdc25B                                                 | CDC25B  |
|  | Carboxypeptidase B                                                                  | CPB1    |
|  | Histone deacetylase 8                                                               | HDAC8   |
|  | Estrogen-related receptor $\alpha$                                                  | ESRRA   |
|  | Estrogen-related receptor $\beta$                                                   | ESRRB   |
|  | Immunoglobulin $\epsilon$ Fc receptor                                               | FCER2   |
|  | UDP-N-acetylglucosamine--peptide<br>N-acetylglucosaminyltransferase 110 kDa subunit | OGT     |
|  | Cystinyl aminopeptidase                                                             | LNPEP   |
|  | NF- $\kappa$ B inhibitor $\alpha$                                                   | NFKBIA  |
|  | Histone deacetylase 5                                                               | HDAC5   |
|  | Tyrosine-protein kinase SYK                                                         | SYK     |
|  | Histone deacetylase 7                                                               | HDAC7   |
|  | Histone deacetylase 4                                                               | HDAC4   |
|  | Serine/threonine-protein kinase B-raf                                               | BRAF    |
|  | PI3-kinase p110- $\alpha$ /p85- $\alpha$                                            | PIK3CA  |
|  | Adenylate cyclase type V                                                            | ADCY5   |
|  | Serine/threonine-protein kinase PIM1                                                | PIM1    |
|  | Tyrosine-protein kinase JAK1                                                        | JAK1    |
|  | Tyrosine-protein kinase JAK2                                                        | JAK2    |
|  | Matrix metalloproteinase 7                                                          | MMP7    |
|  | Purine nucleoside phosphorylase                                                     | PNP     |
|  | Cytochrome P450 19A1                                                                | CYP19A1 |
|  | Serine/threonine-protein kinase ILK-1                                               | ILK     |
|  | Cyclooxygenase-1                                                                    | PTGS1   |
|  | Cytochrome b-c1 complex subunit 7                                                   | UQCRB   |
|  | Anandamide amidohydrolase                                                           | FAAH    |
|  | LDL-associated phospholipase A2                                                     | PLA2G7  |

|                         |                                                               |          |
|-------------------------|---------------------------------------------------------------|----------|
|                         | Cytochrome P450 17A1                                          | CYP17A1  |
|                         | Prostanoid EP3 receptor                                       | PTGER3   |
|                         | Histone acetyltransferase p300                                | EP300    |
|                         | Heat shock protein HSP 90- $\alpha$                           | HSP90AA1 |
|                         | Monoglyceride lipase                                          | MGLL     |
|                         | Sodium channel protein type IX $\alpha$ subunit               | SCN9A    |
|                         | p53-binding protein Mdm-2                                     | MDM2     |
|                         | Mitogen-activated protein kinase kinase kinase 12             | MAP3K12  |
|                         | Arachidonate 5-lipoxygenase                                   | ALOX5    |
|                         | Cytochrome P450 11B1                                          | CYP11B1  |
|                         | Dopamine D3 receptor                                          | DRD3     |
|                         | Cytochrome P450 11B2                                          | CYP11B2  |
|                         | Estradiol 17- $\beta$ -dehydrogenase 3                        | HSD17B3  |
|                         |                                                               |          |
| Protocatechuic Aldehyde | Carbonic anhydrase VI                                         | CA6      |
|                         | Carbonic anhydrase IV                                         | CA4      |
|                         | Carbonic anhydrase III                                        | CA3      |
|                         | $\alpha$ -(1,3)-fucosyltransferase 7                          | FUT7     |
|                         | Carbonic anhydrase VB                                         | CA5B     |
|                         | Carbonic anhydrase VA                                         | CA5A     |
|                         | Carbonic anhydrase II                                         | CA2      |
|                         | Tyrosinase (by homology)                                      | TYR      |
|                         | Carbonic anhydrase VII                                        | CA7      |
|                         | Carbonic anhydrase I                                          | CA1      |
|                         | Carbonic anhydrase XII                                        | CA12     |
|                         | Carbonic anhydrase XIV                                        | CA14     |
|                         | Carbonic anhydrase IX                                         | CA9      |
|                         | Serine/threonine-protein kinase/endoribonuclease IRE1         | ERN1     |
|                         | Catechol O-methyltransferase (by homology)                    | COMT     |
|                         | Dual specificity phosphatase Cdc25B                           | CDC25B   |
|                         | Dual specificity protein phosphatase 1 (by homology)          | DUSP1    |
|                         | Dual-specificity tyrosine-phosphorylation regulated kinase 1A | DYRK1A   |
|                         | Dual specificity protein kinase CLK1                          | CLK1     |
|                         | Dual specificity tyrosine-phosphorylation-regulated kinase 1B | DYRK1B   |
|                         | Transthyretin                                                 | TTR      |
|                         | Epidermal growth factor receptor erbB1                        | EGFR     |
|                         | Serum albumin                                                 | ALB      |
|                         | Histone deacetylase 1                                         | HDAC1    |
|                         | L-lactate dehydrogenase A chain                               | LDHA     |
|                         | L-lactate dehydrogenase B chain                               | LDHB     |

|  |                                                             |          |
|--|-------------------------------------------------------------|----------|
|  | Succinate semialdehyde dehydrogenase                        | ALDH5A1  |
|  | $\gamma$ -amino-N-butyrate transaminase                     | ABAT     |
|  | Fatty acid synthase                                         | FASN     |
|  | Steryl-sulfatase                                            | STS      |
|  | Poly [ADP-ribose] polymerase-1                              | PARP1    |
|  | Indoleamine 2,3-dioxygenase                                 | IDO1     |
|  | Lysine-specific demethylase 4D-like                         | KDM4E    |
|  | Carbonic anhydrase XIII                                     | CA13     |
|  | Estrogen receptor $\beta$                                   | ESR2     |
|  | Induced myeloid leukemia cell differentiation protein Mcl-1 | MCL1     |
|  | Apoptosis regulator Bcl-2                                   | BCL2     |
|  | Histone deacetylase 6                                       | HDAC6    |
|  | Histone deacetylase 2                                       | HDAC2    |
|  | Myoglobin                                                   | MB       |
|  | Estrogen receptor $\alpha$                                  | ESR1     |
|  | Insulin-like growth factor I receptor                       | IGF1R    |
|  | ALK tyrosine kinase receptor                                | ALK      |
|  | Leukocyte common antigen                                    | PTPRC    |
|  | Estradiol 17- $\beta$ -dehydrogenase 1                      | HSD17B1  |
|  | Apoptosis regulator Bcl-X                                   | BCL2L1   |
|  | Arachidonate 15-lipoxygenase                                | ALOX15   |
|  | Alkaline phosphatase placental-like                         | ALPG     |
|  | Phospholipase A-2-activating protein                        | PLAA     |
|  | Aldo-keto-reductase family 1 member C3                      | AKR1C3   |
|  | Proteasome Macropain subunit MB1                            | PSMB5    |
|  | G-protein coupled receptor 35                               | GPR35    |
|  | Dopamine $\beta$ -hydroxylase                               | DBH      |
|  | Hydroxycarboxylic acid receptor 2                           | HCAR2    |
|  | Steroid 5- $\alpha$ -reductase 2                            | SRD5A2   |
|  | Estradiol 17- $\beta$ -dehydrogenase 2                      | HSD17B2  |
|  | Plasminogen activator inhibitor-1                           | SERPINE1 |
|  | Voltage-gated potassium channel subunit Kv1.1               | KCNA1    |
|  | Voltage-gated potassium channel subunit Kv1.4               | KCNA4    |
|  | Arylamine N-acetyltransferase 1                             | NAT1     |
|  | Glycogen synthase kinase-3 $\beta$                          | GSK3B    |
|  | Estradiol 17- $\beta$ -dehydrogenase 3                      | HSD17B3  |
|  | Corticotropin releasing factor receptor 1                   | CRHR1    |
|  | Dopamine D3 receptor                                        | DRD3     |
|  | Thiopurine S-methyltransferase                              | TPMT     |
|  | Histone deacetylase 3                                       | HDAC3    |
|  | Androgen Receptor (by homology)                             | AR       |

|                                |                                                                  |        |
|--------------------------------|------------------------------------------------------------------|--------|
|                                | Cyclooxygenase-1                                                 | PTGS1  |
|                                | Transient receptor potential cation channel subfamily A member 1 | TRPA1  |
|                                | Melatonin receptor 1A                                            | MTNR1A |
|                                | Acetylcholinesterase                                             | ACHE   |
|                                | PI3-kinase p110- $\delta$ subunit                                | PIK3CD |
|                                | DNA-dependent protein kinase                                     | PRKDC  |
|                                | PI3-kinase p110- $\gamma$ subunit                                | PIK3CG |
|                                | Hematopoietic cell protein-tyrosine phosphatase 70Z-PEP          | PTPN22 |
|                                | Serotonin 2b (5-HT2b) receptor                                   | HTR2B  |
|                                | Dopamine D5 receptor                                             | DRD5   |
|                                | Melatonin receptor 1B                                            | MTNR1B |
|                                | Monoamine oxidase A                                              | MAOA   |
|                                | Dopamine D1 receptor                                             | DRD1   |
|                                | Dopamine D2 receptor                                             | DRD2   |
|                                | Dopamine D4 receptor                                             | DRD4   |
|                                | Norepinephrine transporter                                       | SLC6A2 |
|                                | Dopamine transporter                                             | SLC6A3 |
|                                | Aldo-keto reductase family 1 member C2                           | AKR1C2 |
|                                | Aldo-keto reductase family 1 member C1                           | AKR1C1 |
|                                | Thrombin                                                         | F2     |
|                                | Amine oxidase, copper containing                                 | AOC3   |
|                                | Tyrosyl-DNA phosphodiesterase 1                                  | TDP1   |
|                                | PI3-kinase p110- $\alpha$ subunit                                | PIK3CA |
|                                | Myeloperoxidase                                                  | MPO    |
|                                | Cannabinoid receptor 1                                           | CNR1   |
|                                | Cannabinoid receptor 2                                           | CNR2   |
|                                | Butyrylcholinesterase                                            | BCHE   |
|                                | Neuronal acetylcholine receptor protein $\alpha$ -7 subunit      | CHRNA7 |
|                                | Histone acetyltransferase p300                                   | EP300  |
|                                | Lysosomal $\alpha$ -glucosidase                                  | GAA    |
|                                | Quinone reductase 2                                              | NQO2   |
|                                | Adenosine A1 receptor (by homology)                              | ADORA1 |
|                                | Cathepsin (V and K)                                              | CTSV   |
| 4,4'-Dihydroxydiphenyl Methane | Estrogen receptor $\alpha$                                       | ESR1   |
|                                | Estrogen receptor $\beta$                                        | ESR2   |
|                                | Androgen Receptor                                                | AR     |
|                                | Serotonin 6 (5-HT6) receptor                                     | HTR6   |
|                                | Estrogen-related receptor $\gamma$                               | ESRRG  |
|                                | Carbonic anhydrase II                                            | CA2    |
|                                | Carbonic anhydrase IV                                            | CA4    |

|  |                                                               |          |
|--|---------------------------------------------------------------|----------|
|  | Arachidonate 5-lipoxygenase                                   | ALOX5    |
|  | Cyclooxygenase-1                                              | PTGS1    |
|  | Ribosomal protein S6 kinase $\alpha$ 3                        | RPS6KA3  |
|  | Arachidonate 15-lipoxygenase                                  | ALOX15   |
|  | Arachidonate 12-lipoxygenase                                  | ALOX12   |
|  | Cyclooxygenase-2                                              | PTGS2    |
|  | Carbonic anhydrase VII                                        | CA7      |
|  | Carbonic anhydrase XIV                                        | CA14     |
|  | Carbonic anhydrase XIII                                       | CA13     |
|  | Carbonic anhydrase VB                                         | CA5B     |
|  | Carbonic anhydrase VA                                         | CA5A     |
|  | Nuclear receptor ROR- $\gamma$                                | RORC     |
|  | Apoptosis regulator Bcl-X                                     | BCL2L1   |
|  | Apoptosis regulator Bcl-2                                     | BCL2     |
|  | GABA-A receptor; $\alpha$ -1/ $\beta$ -2/ $\gamma$ -2         | GABRA1   |
|  | Dual-specificity tyrosine-phosphorylation regulated kinase 1A | DYRK1A   |
|  | Testis-specific androgen-binding protein                      | SHBG     |
|  | Cyclin-dependent kinase 5/CDK5 activator 1                    | CDK5R1   |
|  | GABA-A receptor; $\alpha$ -1/ $\beta$ -3/ $\gamma$ -2         | GABRB3   |
|  | Serotonin 2b (5-HT2b) receptor                                | HTR2B    |
|  | Matrix metalloproteinase 9                                    | MMP9     |
|  | Matrix metalloproteinase 1                                    | MMP1     |
|  | Matrix metalloproteinase 2                                    | MMP2     |
|  | $\alpha$ -ketoglutarate-dependent dioxygenase FTO             | FTO      |
|  | Norepinephrine transporter                                    | SLC6A2   |
|  | Steroid 5- $\alpha$ -reductase 1                              | SRD5A1   |
|  | D-amino-acid oxidase                                          | DAO      |
|  | Indoleamine 2,3-dioxygenase                                   | IDO1     |
|  | Steroid 5- $\alpha$ -reductase 2                              | SRD5A2   |
|  | Leukotriene A4 hydrolase                                      | LTA4H    |
|  | Poly [ADP-ribose] polymerase-1                                | PARP1    |
|  | Alkaline phosphatase, tissue-nonspecific isozyme              | ALPL     |
|  | Serine/threonine-protein kinase B-raf                         | BRAF     |
|  | $\beta$ -3 adrenergic receptor                                | ADRB3    |
|  | Histone deacetylase 1                                         | HDAC1    |
|  | Dual specificity protein kinase CLK1                          | CLK1     |
|  | Dual specificity tyrosine-phosphorylation-regulated kinase 1B | DYRK1B   |
|  | Nitric-oxide synthase, brain                                  | NOS1     |
|  | Heat shock protein HSP 90- $\alpha$                           | HSP90AA1 |
|  | Nitric-oxide synthase, endothelial                            | NOS3     |
|  | Tyrosine-protein kinase ABL                                   | ABL1     |

|  |                                                                  |          |
|--|------------------------------------------------------------------|----------|
|  | Protein kinase C $\alpha$                                        | PRKCA    |
|  | $\rho$ -associated protein kinase 1                              | ROCK1    |
|  | cAMP-dependent protein kinase $\alpha$ -catalytic subunit        | PRKACA   |
|  | Phenylethanolamine N-methyltransferase                           | PNMT     |
|  | Dual specificity protein phosphatase 3                           | DUSP3    |
|  | Serine/threonine-protein kinase WEE1                             | WEE1     |
|  | Cytochrome P450 19A1                                             | CYP19A1  |
|  | Tyrosinase                                                       | TYR      |
|  | Dopamine D5 receptor                                             | DRD5     |
|  | Interleukin-8 receptor A                                         | CXCR1    |
|  | Neprilysin (by homology)                                         | MME      |
|  | Dihydropteridine reductase                                       | QDPR     |
|  | Transient receptor potential cation channel subfamily A member 1 | TRPA1    |
|  | Uridine phosphorylase 1 (by homology)                            | UPP1     |
|  | Cathepsin L                                                      | CTSL     |
|  | Fatty acid synthase                                              | FASN     |
|  | Insulin-like growth factor I receptor                            | IGF1R    |
|  | Histone deacetylase 6                                            | HDAC6    |
|  | Trace amine-associated receptor 1 (by homology)                  | TAAR1    |
|  | Histone deacetylase 5                                            | HDAC5    |
|  | Histone deacetylase 7                                            | HDAC7    |
|  | LXR- $\alpha$                                                    | NR1H3    |
|  | Histone deacetylase 9                                            | HDAC9    |
|  | Dual specificity mitogen-activated protein kinase kinase 1       | MAP2K1   |
|  | GABA-B receptor                                                  | GABBR2   |
|  | Epoxide hydratase                                                | EPHX2    |
|  | Alkaline phosphatase placental-like                              | ALPG     |
|  | Phospholipase A-2-activating protein                             | PLAA     |
|  | Hepatocyte growth factor receptor                                | MET      |
|  | Serine/threonine-protein kinase Aurora-B                         | AURKB    |
|  | Cyclin-dependent kinase 2                                        | CDK2     |
|  | Cyclin-dependent kinase 4                                        | CDK4     |
|  | Phospholipase A2 group IIA                                       | PLA2G2A  |
|  | Histamine H4 receptor                                            | HRH4     |
|  | Heat shock protein HSP 90- $\beta$                               | HSP90AB1 |
|  | Serine/threonine-protein kinase Aurora-A                         | AURKA    |
|  | $\alpha$ -2a adrenergic receptor                                 | ADRA2A   |
|  | Adrenergic receptor $\alpha$ -2                                  | ADRA2C   |
|  | $\alpha$ -2b adrenergic receptor                                 | ADRA2B   |
|  | Muscarinic acetylcholine receptor M1                             | CHRM1    |

|           |                                                |         |
|-----------|------------------------------------------------|---------|
|           | Serotonin transporter                          | SLC6A4  |
|           | Neurokinin 2 receptor                          | TACR2   |
|           | Dopamine transporter                           | SLC6A3  |
|           | Muscarinic acetylcholine receptor M3           | CHRM3   |
|           | Adenosine A3 receptor                          | ADORA3  |
|           | Heat shock protein 75 kDa, mitochondrial       | TRAP1   |
|           | HERG                                           | KCNH2   |
|           | Microtubule-associated protein $\tau$          | MAPT    |
|           | Fibroblast growth factor receptor 1            | FGFR1   |
|           | Acetylcholinesterase                           | ACHE    |
|           | NADPH oxidase 4                                | NOX4    |
|           | Insulin receptor                               | INSR    |
| Gastrodin | Tyrosinase                                     | TYR     |
|           | Cytidine deaminase (by homology)               | CDA     |
|           | Adenosine A2a receptor (by homology)           | ADORA2A |
|           | Sodium/glucose cotransporter 2                 | SLC5A2  |
|           | Tyrosyl-DNA phosphodiesterase 1                | TDP1    |
|           | Adenosine A1 receptor                          | ADORA1  |
|           | Aldose reductase                               | AKR1B1  |
|           | Sodium/glucose cotransporter 1                 | SLC5A1  |
|           | Low affinity sodium-glucose cotransporter      | SLC5A4  |
|           | $\alpha$ -L-fucosidase I                       | FUCA1   |
|           | Maltase-glucoamylase                           | MGAM    |
|           | Trehalase                                      | TREH    |
|           | Carbonic anhydrase XIV                         | CA14    |
|           | Glutamate carboxypeptidase II                  | FOLH1   |
|           | Adenosine A3 receptor                          | ADORA3  |
|           | Adenosine deaminase                            | ADA     |
|           | Sucrase-isomaltase                             | SI      |
|           | Hexokinase type II                             | HK2     |
|           | Hexokinase type I                              | HK1     |
|           | Pancreatic $\alpha$ -amylase                   | AMY2A   |
|           | Indoleamine 2,3-dioxygenase                    | IDO1    |
|           | Adenosine kinase                               | ADK     |
|           | Aldo-keto-reductase family 1 member C3         | AKR1C3  |
|           | Hypoxanthine-guanine phosphoribosyltransferase | HPRT1   |
|           | Protein-tyrosine phosphatase 1B                | PTPN1   |
|           | Steroid 5- $\alpha$ -reductase 1               | SRD5A1  |
|           | Epoxide hydratase                              | EPHX2   |
|           | NAALADase II                                   | NAALAD2 |
|           | Glyceraldehyde-3-phosphate dehydrogenase liver | GAPDH   |
|           | Heat shock cognate 71 kDa protein              | HSPA8   |

|  |                                              |         |
|--|----------------------------------------------|---------|
|  | Purine nucleoside phosphorylase              | PNP     |
|  | Rhodopsin kinase                             | GRK1    |
|  | Thymidylate kinase                           | DTYMK   |
|  | Carbonic anhydrase I                         | CA1     |
|  | Carbonic anhydrase XII                       | CA12    |
|  | Carbonic anhydrase IX                        | CA9     |
|  | Protein-tyrosine phosphatase 2C              | PTPN11  |
|  | Insulin-like growth factor binding protein 3 | IGFBP3  |
|  | 78 kDa glucose-regulated protein             | HSPA5   |
|  | Bifunctional protein NCOAT                   | OGA     |
|  | Equilibrative nucleoside transporter 1       | SLC29A1 |
|  | PI3-kinase p110- $\gamma$ subunit            | PIK3CG  |
|  | PI3-kinase p110- $\alpha$ subunit            | PIK3CA  |
|  | Cytochrome P450 19A1                         | CYP19A1 |
|  | MAP kinase ERK2                              | MAPK1   |
|  | Neprilysin (by homology)                     | MME     |
|  | Cyclin-dependent kinase 2/cyclin A           | CDK2    |
|  | Dipeptidyl peptidase IV                      | DPP4    |
|  | Carbonic anhydrase VA                        | CA5A    |
|  | Carbonic anhydrase VI                        | CA6     |
|  | Adenosylhomocysteinase                       | AHCY    |
|  | Fructose-1,6-bisphosphatase                  | FBP1    |
|  | Glutamate receptor ionotropic kainate 1      | GRIK1   |
|  | Insulin-like growth factor I receptor        | IGF1R   |
|  | Insulin receptor                             | INSR    |
|  | Glutamate receptor ionotropic kainate 2      | GRIK2   |
|  | Glutamate receptor ionotropic kainate 3      | GRIK3   |
|  | Leukocyte adhesion molecule-1                | SELL    |
|  | Selectin E                                   | SELE    |
|  | P-selectin                                   | SELP    |
|  | Carbonic anhydrase III                       | CA3     |
|  | Liver glycogen phosphorylase                 | PYGL    |
|  | Muscle glycogen phosphorylase                | PYGM    |
|  | Carbonic anhydrase II                        | CA2     |
|  | Caspase-3                                    | CASP3   |
|  | $\gamma$ -glutamyl hydrolase                 | GGH     |
|  | Aminopeptidase A                             | ENPEP   |
|  | Glycogen synthase kinase-3 $\beta$           | GSK3B   |
|  | Matrix metalloproteinase 13                  | MMP13   |
|  | Matrix metalloproteinase 1                   | MMP1    |
|  | Matrix metalloproteinase 7                   | MMP7    |
|  | Matrix metalloproteinase 8                   | MMP8    |

|                                                             |                                                       |          |
|-------------------------------------------------------------|-------------------------------------------------------|----------|
|                                                             | Aldo-keto reductase family 1 member C2                | AKR1C2   |
|                                                             | Cyclooxygenase-1                                      | PTGS1    |
|                                                             | P2X purinoceptor 3                                    | P2RX3    |
|                                                             | Aldo-keto reductase family 1 member C1                | AKR1C1   |
|                                                             | Cyclin-dependent kinase 1/cyclin B1                   | CDK1     |
|                                                             | Serine/threonine-protein kinase/endoribonuclease IRE1 | ERN1     |
|                                                             | Endothelin receptor ET-A (by homology)                | EDNRA    |
|                                                             | Cystic fibrosis transmembrane conductance regulator   | CFTR     |
|                                                             | Caspase-6                                             | CASP6    |
|                                                             | Caspase-7                                             | CASP7    |
|                                                             | Caspase-8                                             | CASP8    |
|                                                             | Endothelin-converting enzyme 1                        | ECE1     |
|                                                             | Caspase-1                                             | CASP1    |
|                                                             | Caspase-2                                             | CASP2    |
|                                                             | Matrix metalloproteinase 16                           | MMP16    |
|                                                             | $\alpha$ -ketoglutarate-dependent dioxygenase FTO     | FTO      |
|                                                             | Adenosine A2b receptor                                | ADORA2B  |
|                                                             | Matrix metalloproteinase 9                            | MMP9     |
|                                                             | Matrix metalloproteinase 14                           | MMP14    |
|                                                             | Dopamine D2 receptor                                  | DRD2     |
|                                                             | Dopamine D4 receptor                                  | DRD4     |
|                                                             | G-protein coupled receptor 35                         | GPR35    |
|                                                             | Thymidine phosphorylase                               | TYMP     |
|                                                             | Acyl-CoA: dihydroxyacetonephosphate acyltransferase   | GNPAT    |
|                                                             | Phospholipase A2 group 1VB                            | PLA2G4B  |
|                                                             | Inosine-5'-monophosphate dehydrogenase 1              | IMPDH1   |
|                                                             | Inosine-5'-monophosphate dehydrogenase 2              | IMPDH2   |
|                                                             | Epidermal growth factor receptor erbB1                | EGFR     |
| Tris-[4-(Î <sup>+</sup> -D-Glucopyranosyloxy)Benzyl]Citrate | Tyrosyl-DNA phosphodiesterase 1                       | TDP1     |
|                                                             | Estrogen receptor $\alpha$                            | ESR1     |
|                                                             | Tyrosinase                                            | TYR      |
|                                                             | Aldose reductase (by homology)                        | AKR1B1   |
|                                                             | Eukaryotic initiation factor 4A-I                     | EIF4A1   |
|                                                             | Low affinity sodium-glucose cotransporter             | SLC5A4   |
|                                                             | Telomerase reverse transcriptase                      | TERT     |
|                                                             | Heat shock protein HSP 90- $\alpha$                   | HSP90AA1 |
|                                                             | Adenosine A2a receptor                                | ADORA2A  |
|                                                             | Adenosine A3 receptor                                 | ADORA3   |
|                                                             | Cytochrome P450 19A1                                  | CYP19A1  |
|                                                             | T-cell protein-tyrosine phosphatase                   | PTPN2    |

|  |                                                        |          |
|--|--------------------------------------------------------|----------|
|  | Pancreatic $\alpha$ -amylase                           | AMY2A    |
|  | Squalene monooxygenase (by homology)                   | SQLE     |
|  | Epoxide hydratase                                      | EPHX2    |
|  | Adenosine A1 receptor                                  | ADORA1   |
|  | Vascular endothelial growth factor receptor 2          | KDR      |
|  | Thrombin and coagulation factor X                      | F10      |
|  | AMY1C                                                  | AMY1A    |
|  | Plasminogen activator inhibitor-1                      | SERPINE1 |
|  | Caspase-3                                              | CASP3    |
|  | Norepinephrine transporter                             | SLC6A2   |
|  | Steroid 5- $\alpha$ -reductase 1                       | SRD5A1   |
|  | Platelet activating factor receptor                    | PTAFR    |
|  | Integrin $\alpha$ -V/ $\beta$ -3                       | ITGAV    |
|  | P47929                                                 | LGALS7   |
|  | Squalene synthetase (by homology)                      | FDFT1    |
|  | Sodium/potassium-transporting ATPase $\alpha$ -1 chain | ATP1A1   |
|  | Neurokinin 2 receptor                                  | TACR2    |
|  | 3-phosphoinositide dependent protein kinase-1          | PDPK1    |
|  | Integrin $\beta$ -3                                    | ITGB3    |
|  | HLA class I histocompatibility antigen A-3             | HLA-A    |
|  | Somatostatin receptor 5                                | SSTR5    |
|  | Somatostatin receptor 2                                | SSTR2    |
|  | Somatostatin receptor 4                                | SSTR4    |
|  | Somatostatin receptor 1                                | SSTR1    |
|  | Somatostatin receptor 3                                | SSTR3    |
|  | $\delta$ opioid receptor                               | OPRD1    |
|  | Cholecystokinin B receptor                             | CCKBR    |
|  | P-selectin                                             | SELP     |
|  | Glutaminase kidney isoform, mitochondrial              | GLS      |
|  | Tyrosine-protein kinase receptor FLT3                  | FLT3     |
|  | Apoptosis regulator Bcl-2                              | BCL2     |
|  | Matrix metalloproteinase 13                            | MMP13    |
|  | Folylpoly- $\gamma$ -glutamate synthetase              | FPGS     |
|  | Matrix metalloproteinase 9                             | MMP9     |
|  | Matrix metalloproteinase 8                             | MMP8     |
|  | Histone deacetylase 6                                  | HDAC6    |
|  | Histone deacetylase 8                                  | HDAC8    |
|  | Histone deacetylase 1                                  | HDAC1    |
|  | Receptor-type tyrosine-protein phosphatase $\alpha$    | PTPRA    |
|  | Thymidylate synthase (by homology)                     | TYMS     |
|  | Neurokinin 1 receptor (by homology)                    | TACR1    |
|  | Membrane-associated guanylate kinase-related 3         | MAGI3    |

|  |                                                             |         |
|--|-------------------------------------------------------------|---------|
|  | Vascular endothelial growth factor A                        | VEGFA   |
|  | Acidic fibroblast growth factor                             | FGF1    |
|  | Basic fibroblast growth factor                              | FGF2    |
|  | Heparanase                                                  | HPSE    |
|  | Protein kinase C $\delta$                                   | PRKCD   |
|  | Carbonic anhydrase XIV                                      | CA14    |
|  | Carbonic anhydrase IV                                       | CA4     |
|  | Protein kinase C $\gamma$                                   | PRKCG   |
|  | Protein kinase C $\alpha$                                   | PRKCA   |
|  | Protein kinase C $\beta$                                    | PRKCB   |
|  | Protein kinase C $\varepsilon$                              | PRKCE   |
|  | Protein kinase C $\eta$                                     | PRKCH   |
|  | Protein kinase C $\theta$                                   | PRKCQ   |
|  | DNA (cytosine-5)-methyltransferase 1                        | DNMT1   |
|  | Cathepsin D                                                 | CTSD    |
|  | DNA (cytosine-5)-methyltransferase 3B                       | DNMT3B  |
|  | Epidermal growth factor receptor erbB1                      | EGFR    |
|  | Renin                                                       | REN     |
|  | Leukocyte common antigen                                    | PTPRC   |
|  | Phospholipase A2 group 1VB                                  | PLA2G4B |
|  | Glutamate carboxypeptidase II                               | FOLH1   |
|  | Neuropeptide Y receptor type 1                              | NPY1R   |
|  | Free fatty acid receptor 1                                  | FFAR1   |
|  | Cyclooxygenase-1                                            | PTGS1   |
|  | Leukocyte elastase                                          | ELANE   |
|  | Acetylcholinesterase                                        | ACHE    |
|  | Sodium/glucose cotransporter 2                              | SLC5A2  |
|  | Sodium/glucose cotransporter 1                              | SLC5A1  |
|  | Ileal bile acid transporter                                 | SLC10A2 |
|  | Solute carrier family 28 member 3                           | SLC28A3 |
|  | CD22                                                        | CD22    |
|  | Protein-tyrosine phosphatase 1B                             | PTPN1   |
|  | Butyrylcholinesterase                                       | BCHE    |
|  | P-glycoprotein 1                                            | ABCB1   |
|  | Cyclooxygenase-2                                            | PTGS2   |
|  | Induced myeloid leukemia cell differentiation protein Mcl-1 | MCL1    |
|  | Glucagon receptor                                           | GCGR    |
|  | $\alpha$ -1a adrenergic receptor                            | ADRA1A  |
|  | $\alpha$ -1b adrenergic receptor                            | ADRA1B  |
|  | C-C chemokine receptor type 6                               | CCR6    |
|  | Niemann-Pick C1-like protein 1                              | NPC1L1  |

|  |                                                 |        |
|--|-------------------------------------------------|--------|
|  | Vanilloid receptor (by homology)                | TRPV1  |
|  | Aldehyde dehydrogenase                          | ALDH2  |
|  | Leukocyte adhesion molecule-1                   | SELL   |
|  | Metabotropic glutamate receptor 2 (by homology) | GRM2   |
|  | Inosine-5'-monophosphate dehydrogenase 2        | IMPDH2 |

**Table SIII.** Target molecules obtained from the ETCM and SwissTargetPrediction databases are collected and assembled to remove all the drug targets.

|                                         |
|-----------------------------------------|
| Targets for the active ingredient of GE |
| HMGCR                                   |
| CYP51A1                                 |
| AR                                      |
| NPC1L1                                  |
| NR1H3                                   |
| CYP17A1                                 |
| RORC                                    |
| CYP19A1                                 |
| ESR2                                    |
| ESR1                                    |
| SHBG                                    |
| SREBF2                                  |
| CYP2C19                                 |
| SLC6A2                                  |
| BCHE                                    |
| RORA                                    |
| PTPN1                                   |
| SERPINA6                                |
| SLC6A4                                  |
| G6PD                                    |
| NR1I3                                   |
| CHRM2                                   |
| ACHE                                    |
| VDR                                     |
| CES2                                    |
| NR1H2                                   |
| CDC25A                                  |
| PTGER1                                  |
| PTGER2                                  |
| HSD11B1                                 |
| DHCR7                                   |
| GLRA1                                   |
| PPARD                                   |
| SQLE                                    |
| PTPN6                                   |
| FDFT1                                   |
| NOS2                                    |
| NR3C1                                   |
| CDC25B                                  |
| SHH                                     |

|         |
|---------|
| UGT2B7  |
| HSD11B2 |
| DRD2    |
| POLB    |
| PREP    |
| TBXAS1  |
| PTGER4  |
| IDO1    |
| MDM4    |
| CCR1    |
| MDM2    |
| SIGMAR1 |
| CHRM4   |
| ATP12A  |
| PTGIR   |
| PRKCG   |
| PRKCD   |
| PRKCB   |
| PRKCE   |
| PRKCQ   |
| FABP4   |
| FABP3   |
| FABP5   |
| FABP1   |
| PTGES   |
| PTPN2   |
| ADORA3  |
| MAPK3   |
| PTPN11  |
| AKR1B10 |
| KCNA5   |
| ACACB   |
| PTPRF   |
| PLA2G1B |
| ACP1    |
| BACE1   |
| HTR2B   |
| PTAFR   |
| GRM2    |
| SCD     |
| BACE2   |
| MGLL    |
| PRKCH   |

|        |
|--------|
| TACR1  |
| PPARA  |
| F2R    |
| ALK    |
| IGF1R  |
| SRC    |
| KDR    |
| AGTR1  |
| TOP2A  |
| AVPR2  |
| AVPR1A |
| MTNR1A |
| MTNR1B |
| CHRM5  |
| IL6ST  |
| MAPK14 |
| ERN1   |
| CA2    |
| CA7    |
| CA1    |
| CA12   |
| CA14   |
| CA9    |
| CA4    |
| CA3    |
| CA6    |
| CA5A   |
| PTPRC  |
| EP300  |
| TTR    |
| NAT1   |
| ALPG   |
| PLAA   |
| AKR1C3 |
| MMP1   |
| MB     |
| PIM1   |
| HDAC3  |
| ACE    |
| FUT7   |
| CA5B   |
| PDE5A  |
| PTPN22 |

|          |
|----------|
| KCNMA1   |
| DUSP1    |
| FYN      |
| LCK      |
| PIK3CD   |
| PRKDC    |
| PIK3CG   |
| CISD1    |
| VCAM1    |
| SLC9A1   |
| TPMT     |
| COMT     |
| CHRNA7   |
| IMPDH2   |
| MPO      |
| MMP9     |
| MMP2     |
| MKNK1    |
| MAOB     |
| ASF1A    |
| TUBB1    |
| GRM5     |
| HDAC6    |
| ALPL     |
| TYMS     |
| HCAR2    |
| MMP8     |
| MMP3     |
| PIK3CA   |
| ADCY5    |
| DAO      |
| CTSL     |
| PIM3     |
| AOC3     |
| MAPK9    |
| MME      |
| HMOX1    |
| PRKD1    |
| PRKD2    |
| TGM2     |
| PARP1    |
| SERPINE1 |
| FBP1     |

|         |
|---------|
| CNR1    |
| CNR2    |
| POLA1   |
| MCL1    |
| HDAC8   |
| METAP1  |
| LRRK2   |
| KDM5C   |
| KDM4B   |
| KDM5B   |
| KDM4A   |
| CHRM1   |
| SRD5A2  |
| ALDH1A1 |
| CES1    |
| HDAC5   |
| HDAC7   |
| MAPK1   |
| CTSV    |
| ALB     |
| ABL1    |
| DAPK3   |
| FABP2   |
| FFAR1   |
| SLC22A6 |
| NR1H4   |
| PHF8    |
| HSD17B3 |
| GABBR1  |
| KDM2A   |
| GPBAR1  |
| GABRA2  |
| FNTA    |
| HAO1    |
| PTGFR   |
| GSTK1   |
| LTA4H   |
| NR0B2   |
| CDC45   |
| PPARG   |
| CYP26A1 |
| RXRA    |
| RARG    |

|          |
|----------|
| RARB     |
| RARA     |
| FAAH     |
| TERT     |
| CYP26B1  |
| RXRG     |
| FFAR4    |
| CACNA2D1 |
| RXRB     |
| SLC16A1  |
| ALOX15   |
| ALOX12   |
| EPHX2    |
| ABCC1    |
| ABCB1    |
| PLA2G4A  |
| SAE1     |
| PLG      |
| RORB     |
| PTGDR2   |
| ITGAL    |
| TBXA2R   |
| HNF4A    |
| AKR1C1   |
| ENPP2    |
| PGR      |
| TRPA1    |
| RBP4     |
| GCG      |
| STS      |
| PTGDR    |
| PSEN2    |
| PRKAG1   |
| THRA     |
| THRB     |
| PTGER3   |
| DGAT1    |
| ADRA2B   |
| PTGES2   |
| CDK1     |
| HSP90AA1 |
| VEGFA    |
| FGF1     |

|         |
|---------|
| HPSE    |
| FGF2    |
| LGALS4  |
| LGALS3  |
| LGALS8  |
| ADRA2A  |
| ADRA2C  |
| DRD1    |
| ADRA1D  |
| HTR2A   |
| HTR2C   |
| DRD3    |
| CYP2D6  |
| HTR6    |
| ADRA1A  |
| HTR1B   |
| FOLH1   |
| TRPV1   |
| STAT3   |
| PYGL    |
| PYGM    |
| PYGB    |
| AHCY    |
| OPRK1   |
| IL2     |
| NAALAD2 |
| SCN9A   |
| TREH    |
| GLRA2   |
| GGH     |
| SSTR5   |
| SSTR2   |
| SSTR4   |
| SSTR1   |
| SSTR3   |
| NEU3    |
| NEU2    |
| NEU4    |
| OGA     |
| ECE1    |
| AMY2A   |
| MGAM    |
| SI      |

|         |
|---------|
| KMO     |
| IGF2R   |
| BCL2L1  |
| ADORA2A |
| ADORA1  |
| CA13    |
| ADA     |
| PPM1A   |
| AKR1B1  |
| LAP3    |
| MLNR    |
| KCNH2   |
| OPRM1   |
| CASP3   |
| TYR     |
| FUCA1   |
| GBA     |
| DTYMK   |
| HK2     |
| HK1     |
| CDA     |
| LGALS9  |
| ATP1A1  |
| ABCB11  |
| EGLN1   |
| ACLY    |
| SLC6A1  |
| GABRA1  |
| GABRA3  |
| GABBR2  |
| GABRR1  |
| SLC6A11 |
| SLC6A13 |
| KDM3A   |
| FTO     |
| KDM5A   |
| EGLN2   |
| EGLN3   |
| HIF1AN  |
| KDM4D   |
| KDM4C   |
| RNPEP   |
| KDM6B   |

|         |
|---------|
| KDM4E   |
| S1PR3   |
| S1PR1   |
| S1PR5   |
| S1PR4   |
| PFKFB3  |
| FLT1    |
| MET     |
| PPM1B   |
| PPP1CC  |
| PPP2CA  |
| PPP2R5A |
| ALOX5   |
| VCP     |
| MAOA    |
| ADORA2B |
| HPGD    |
| CXCR3   |
| DRD4    |
| GPR119  |
| JAK2    |
| CSF1R   |
| CHRM3   |
| TYRO3   |
| CYP2C9  |
| CYP3A4  |
| MMP13   |
| ADAM17  |
| ADRB2   |
| ADRB1   |
| ADRB3   |
| BRD4    |
| HDAC1   |
| PLK1    |
| FASN    |
| PDK1    |
| CCR5    |
| REN     |
| HDAC2   |
| HTR4    |
| NPC1    |
| ERBB2   |
| EGFR    |

|         |
|---------|
| HTR1A   |
| MAP2K1  |
| SCN5A   |
| PDE4B   |
| PRF1    |
| KIT     |
| FLT3    |
| AURKB   |
| AURKA   |
| ALDH5A1 |
| ABAT    |
| HSD17B1 |
| DYRK1A  |
| CLK1    |
| DYRK1B  |
| GSK3B   |
| HSD17B2 |
| LDHA    |
| LDHB    |
| ESRRG   |
| AKR1C2  |
| CRHR1   |
| GABRB3  |
| PTGS1   |
| BCL2    |
| ELANE   |
| GSTA1   |
| CFTR    |
| ALDH2   |
| F3      |
| GPR35   |
| PTGS2   |
| DPP4    |
| TACR2   |
| SLC6A3  |
| TAAR1   |
| SLC1A1  |
| GRM3    |
| GRIK1   |
| GRIA1   |
| GRIK5   |
| GRM4    |
| GRIA4   |

|          |
|----------|
| GRM8     |
| GRIK2    |
| GRIK3    |
| GRM1     |
| GRM7     |
| GRIA2    |
| GRM6     |
| PGD      |
| CPT1A    |
| SLC1A2   |
| SLC22A12 |
| CDK2     |
| GRK6     |
| EDNRA    |
| PLAU     |
| CHEK1    |
| WEE1     |
| HCK      |
| EDNRB    |
| CCR9     |
| MTOR     |
| MMP14    |
| PNMT     |
| NPY5R    |
| GCGR     |
| YWHAG    |
| CPB1     |
| ESRRA    |
| ESRRB    |
| FCER2    |
| OGT      |
| LNPEP    |
| NFKBIA   |
| SYK      |
| HDAC4    |
| BRAF     |
| JAK1     |
| MMP7     |
| PNP      |
| ILK      |
| UQCRB    |
| PLA2G7   |
| MAP3K12  |

|          |
|----------|
| CYP11B1  |
| CYP11B2  |
| PSMB5    |
| DBH      |
| KCNA1    |
| KCNA4    |
| DRD5     |
| F2       |
| TDP1     |
| GAA      |
| NQO2     |
| RPS6KA3  |
| CDK5R1   |
| SRD5A1   |
| NOS1     |
| NOS3     |
| PRKCA    |
| ROCK1    |
| PRKACA   |
| DUSP3    |
| CXCR1    |
| QDPR     |
| UPP1     |
| HDAC9    |
| CDK4     |
| PLA2G2A  |
| HRH4     |
| HSP90AB1 |
| TRAP1    |
| MAPT     |
| FGFR1    |
| NOX4     |
| INSR     |
| SLC5A2   |
| SLC5A1   |
| SLC5A4   |
| ADK      |
| HPRT1    |
| GAPDH    |
| HSPA8    |
| GRK1     |
| IGFBP3   |
| HSPA5    |

|         |
|---------|
| SLC29A1 |
| SELL    |
| SELE    |
| SELP    |
| ENPEP   |
| P2RX3   |
| CASP6   |
| CASP7   |
| CASP8   |
| CASP1   |
| CASP2   |
| MMP16   |
| TYMP    |
| GNPAT   |
| PLA2G4B |
| IMPDH1  |
| EIF4A1  |
| F10     |
| AMY1A   |
| ITGAV   |
| LGALS7  |
| PDPK1   |
| HLA-A   |
| OPRD1   |
| CCKBR   |
| GLS     |
| FPGS    |
| PTPRA   |
| MAGI3   |
| DNMT1   |
| CTSD    |
| DNMT3B  |
| NPY1R   |
| SLC10A2 |
| SLC28A3 |
| CD22    |
| ADRA1B  |
| CCR6    |
| CLEC4E  |
| GABRA4  |
| GABRA5  |
| GABRA6  |
| GABRB1  |

|         |
|---------|
| GABRB2  |
| GABRD   |
| GABRE   |
| GABRG1  |
| GABRG2  |
| GABRG3  |
| GABRP   |
| GABRQ   |
| GRIN1   |
| GRIN2A  |
| GRIN2B  |
| GRIN2C  |
| GRIN2D  |
| GRIN3A  |
| GRIN3B  |
| LIP3    |
| LSS     |
| NCOA2   |
| NR1I2   |
| NR3C2   |
| SULT2A1 |
| SULT2B1 |
| PLA2G2E |
| ACADSB  |
| ACOX1   |
| ACSL3   |
| ACSL4   |
| ADH5    |
| ARF1    |
| ARF6    |
| C8G     |
| CALM1   |
| CYP2C8  |
| ECI2    |
| ELOVL4  |
| FADS1   |
| FADS2   |
| FKBP1A  |
| FURIN   |
| GLTP    |
| GM2A    |
| GUCA1A  |
| HNF4G   |

|             |
|-------------|
| INS         |
| LALBA       |
| LTB4R       |
| LTB4R2      |
| LTF         |
| LY96        |
| NCOA1       |
| OGDH        |
| PAEP        |
| PKIA        |
| PLA2G2D     |
| PMP2        |
| PPA_RS05235 |
| PPP3CA      |
| PPP3R1      |
| PPT1        |
| PVR         |
| RCVRN       |
| RHO         |
| S100B       |
| SCN10A      |
| SCN11A      |
| SCN1A       |
| SCN1B       |
| SCN2A       |
| SCN2B       |
| SCN3A       |
| SCN3B       |
| SCN4A       |
| SCN4B       |
| SCN7A       |
| SCN8A       |
| SEC14L2     |
| SLC8A1      |
| SREBF1      |
| TLR4        |
| TM1468      |
| TRAPPC3     |
| VLDLR       |
| ABO         |
| ACTA1       |
| AMY2B       |
| ATOX1       |

|              |
|--------------|
| BAMF_RS28815 |
| CYP2B6       |
| FHIT         |
| FTL          |
| GCK          |
| GLT6D1       |
| GNPDA1       |
| HBA1         |
| HBB          |
| IFNB1        |
| KRTAP5-2     |
| KRTAP5-3     |
| LCTL         |
| LGALS2       |
| LYZ          |
| NCAN         |
| NUDT9        |
| RTCB         |
| SFTPD        |
| SIGLEC1      |
| SMARCA5      |
| TAS1R2       |
| TM0024       |
| ACO2         |
| AKR1D1       |
| ALAD         |
| ASPH         |
| BBOX1        |
| HSD17B6      |
| OXCT1        |
| OXCT2        |
| P3H1         |
| P3H2         |
| P3H3         |
| P4HA1        |
| P4HA2        |
| PLOD1        |
| PLOD3        |
| SDHA         |
| SDHB         |
| SDHC         |
| SDHD         |
| SLC13A1      |

|          |
|----------|
| SLC13A2  |
| SLC13A3  |
| SLC25A10 |
| SUCLA2   |
| SUCLG1   |
| SUCLG2   |
| SUCNR1   |
| TMLHE    |
| ANXA1    |
| ATP1A2   |
| ATP1A3   |
| GLRA3    |
| HSD3B1   |
| LPL      |
| NFKB1    |
| NFKB2    |
| SLCO1B3  |
| TNF      |
| YWHAE    |
| E        |
| ERG11    |
| ANG      |
| APRT     |
| BC1747   |
| BHMT     |
| CS       |
| CTDSP1   |
| GNMT     |
| HGS      |
| HS3ST3A1 |
| IDH1     |
| IDH2     |
| IL4I1    |
| ITEVIR   |
| ITPA     |
| LSM6     |
| MDH2     |
| ME2      |
| MIF      |
| PLEKHA1  |
| RNASE1   |
| RNASE3   |
| TM0857   |

|          |
|----------|
| TM1436   |
| TNFSF13B |
| UCK2     |
| LCN2     |
| LCT      |
| MBL2     |
| EBP      |
| FNTB     |
| UBA2     |
| ICAM1    |
| PSENEN   |
| PRKAB1   |
| PIK3R1   |
| CDK5     |
| CCNA1    |
| CCNB1    |
| ITGB3    |
| ITGB2    |
| NCSTN    |
| PRKAA2   |
| CCNA2    |
| APH1A    |
| PSEN1    |
| APH1B    |

Table SIV. IS targets in the GeneCards.

| Gene symbol | Description                                                               | Category       | Gifts | GeneCards ID | Relevance score | Reference                                                                                                                             |
|-------------|---------------------------------------------------------------------------|----------------|-------|--------------|-----------------|---------------------------------------------------------------------------------------------------------------------------------------|
| NOTCH3      | Notch Receptor 3                                                          | Protein coding | 50    | GC19M015159  | 75.72226715     | <a href="https://www.genecards.org/cgi-bin/carddisp.pl?gene=NOTCH3">genecards.org/cgi-bin/carddisp.pl?gene=NOTCH3</a>                 |
| F5          | Coagulation Factor V                                                      | Protein coding | 45    | GC01M169511  | 72.80163574     | <a href="https://www.genecards.org/cgi-bin/carddisp.pl?gene=F5">https://www.genecards.org/cgi-bin/carddisp.pl?gene=F5</a>             |
| F2          | Coagulation Factor II, Thrombin                                           | Protein coding | 48    | GC11P046720  | 70.71131134     | <a href="https://www.genecards.org/cgi-bin/carddisp.pl?gene=F2">https://www.genecards.org/cgi-bin/carddisp.pl?gene=F2</a>             |
| NOS3        | Nitric Oxide Synthase 3                                                   | Protein coding | 51    | GC07P150990  | 64.72219849     | <a href="https://www.genecards.org/cgi-bin/carddisp.pl?gene=NOS3">https://www.genecards.org/cgi-bin/carddisp.pl?gene=NOS3</a>         |
| MT-TL1      | Mitochondrially Encoded TRNA-Leu (UUA/G) 1                                | RNA gene       | 16    | GCMTP003232  | 58.29695129     | <a href="https://www.genecards.org/cgi-bin/carddisp.pl?gene=MT-TL1">https://www.genecards.org/cgi-bin/carddisp.pl?gene=MT-TL1</a>     |
| ALOX5AP     | Arachidonate 5-Lipoxygenase Activating Protein                            | Protein coding | 44    | GC13P030713  | 51.97010422     | <a href="https://www.genecards.org/cgi-bin/carddisp.pl?gene=ALOX5AP">https://www.genecards.org/cgi-bin/carddisp.pl?gene=ALOX5AP</a>   |
| FBN1        | Fibrillin 1                                                               | Protein coding | 46    | GC15M048408  | 51.71870422     | <a href="https://www.genecards.org/cgi-bin/carddisp.pl?gene=FBN1">https://www.genecards.org/cgi-bin/carddisp.pl?gene=FBN1</a>         |
| PRKCH       | Protein Kinase C $\eta$                                                   | Protein coding | 51    | GC14P061187  | 47.69760895     | <a href="https://www.genecards.org/cgi-bin/carddisp.pl?gene=PRKCH">https://www.genecards.org/cgi-bin/carddisp.pl?gene=PRKCH</a>       |
| ACE         | Angiotensin I Converting Enzyme                                           | Protein coding | 50    | GC17P063477  | 46.07327271     | <a href="https://www.genecards.org/cgi-bin/carddisp.pl?gene=ACE">https://www.genecards.org/cgi-bin/carddisp.pl?gene=ACE</a>           |
| LDLR        | Low Density Lipoprotein Receptor                                          | Protein coding | 49    | GC19P011091  | 46.04667664     | <a href="https://www.genecards.org/cgi-bin/carddisp.pl?gene=LDLR">https://www.genecards.org/cgi-bin/carddisp.pl?gene=LDLR</a>         |
| MTHFR       | Methylenetetrahydrofolate Reductase                                       | Protein coding | 48    | GC01M011785  | 45.67252731     | <a href="https://www.genecards.org/cgi-bin/carddisp.pl?gene=MTHFR">https://www.genecards.org/cgi-bin/carddisp.pl?gene=MTHFR</a>       |
| GP1BA       | Glycoprotein Ib Platelet Subunit $\alpha$                                 | Protein coding | 45    | GC17P004932  | 45.06479645     | <a href="https://www.genecards.org/cgi-bin/carddisp.pl?gene=GP1BA">https://www.genecards.org/cgi-bin/carddisp.pl?gene=GP1BA</a>       |
| PIK3CA      | Phosphatidylinositol-4,5-Bisphosphate 3-Kinase Catalytic Subunit $\alpha$ | Protein coding | 53    | GC03P179148  | 41.61894608     | <a href="https://www.genecards.org/cgi-bin/carddisp.pl?gene=PIK3CA">https://www.genecards.org/cgi-bin/carddisp.pl?gene=PIK3CA</a>     |
| ACSL4       | Acyl-CoA Synthetase Long Chain Family Member 4                            | Protein coding | 45    | GC0XM109624  | 37.55938339     | <a href="https://www.genecards.org/cgi-bin/carddisp.pl?gene=ACSL4">https://www.genecards.org/cgi-bin/carddisp.pl?gene=ACSL4</a>       |
| COL4A1      | Collagen Type IV $\alpha$ 1 Chain                                         | Protein coding | 48    | GC13M110148  | 35.11104584     | <a href="https://www.genecards.org/cgi-bin/carddisp.pl?gene=COL4A1">https://www.genecards.org/cgi-bin/carddisp.pl?gene=COL4A1</a>     |
| ENG         | Endoglin                                                                  | Protein coding | 45    | GC09M127815  | 33.80020905     | <a href="https://www.genecards.org/cgi-bin/carddisp.pl?gene=ENG">https://www.genecards.org/cgi-bin/carddisp.pl?gene=ENG</a>           |
| CRP         | C-Reactive Protein                                                        | Protein coding | 45    | GC01M159720  | 32.44629669     | <a href="https://www.genecards.org/cgi-bin/carddisp.pl?gene=CRP">https://www.genecards.org/cgi-bin/carddisp.pl?gene=CRP</a>           |
| MT-ND1      | Mitochondrially Encoded NADH:Ubiquinone Oxidoreductase Core Subunit 1     | Protein coding | 33    | GCMTMP003309 | 32.16898346     | <a href="https://www.genecards.org/cgi-bin/carddisp.pl?gene=MT-ND1">https://www.genecards.org/cgi-bin/carddisp.pl?gene=MT-ND1</a>     |
| APOE        | Apolipoprotein E                                                          | Protein coding | 50    | GC19P044906  | 30.52431488     | <a href="https://www.genecards.org/cgi-bin/carddisp.pl?gene=APOE">https://www.genecards.org/cgi-bin/carddisp.pl?gene=APOE</a>         |
| IL6         | Interleukin 6                                                             | Protein coding | 48    | GC07P022725  | 29.1897049      | <a href="https://www.genecards.org/cgi-bin/carddisp.pl?gene=IL6">https://www.genecards.org/cgi-bin/carddisp.pl?gene=IL6</a>           |
| TNF         | Tumor Necrosis Factor                                                     | Protein coding | 50    | GC06P058308  | 29.18524742     | <a href="https://www.genecards.org/cgi-bin/carddisp.pl?gene=TNF">https://www.genecards.org/cgi-bin/carddisp.pl?gene=TNF</a>           |
| AGTR1       | Angiotensin II Receptor Type 1                                            | Protein coding | 51    | GC03P148697  | 28.07429886     | <a href="https://www.genecards.org/cgi-bin/carddisp.pl?gene=AGTR1">https://www.genecards.org/cgi-bin/carddisp.pl?gene=AGTR1</a>       |
| MT-ND5      | Mitochondrially Encoded NADH:Ubiquinone Oxidoreductase Core Subunit 5     | Protein coding | 33    | GCMTMP012339 | 28.06443214     | <a href="https://www.genecards.org/cgi-bin/carddisp.pl?gene=MT-ND5">https://www.genecards.org/cgi-bin/carddisp.pl?gene=MT-ND5</a>     |
| SERPINE1    | Serpin Family E Member 1                                                  | Protein coding | 50    | GC07P101127  | 26.93718338     | <a href="https://www.genecards.org/cgi-bin/carddisp.pl?gene=SERPINE1">https://www.genecards.org/cgi-bin/carddisp.pl?gene=SERPINE1</a> |
| MT-ND6      | Mitochondrially Encoded NADH:Ubiquinone Oxidoreductase Core Subunit 6     | Protein coding | 33    | GCMTM014151  | 25.9613781      | <a href="https://www.genecards.org/cgi-bin/carddisp.pl?gene=MT-ND6">https://www.genecards.org/cgi-bin/carddisp.pl?gene=MT-ND6</a>     |
| AGT         | Angiotensinogen                                                           | Protein coding | 49    | GC01M230702  | 25.70749855     | <a href="https://www.genecards.org/cgi-bin/carddisp.pl?gene=AGT">https://www.genecards.org/cgi-bin/carddisp.pl?gene=AGT</a>           |
| ADA2        | Adenosine Deaminase 2                                                     | Protein coding | 33    | GC22M017179  | 25.67053986     | <a href="https://www.genecards.org/cgi-bin/carddisp.pl?gene=ADA2">https://www.genecards.org/cgi-bin/carddisp.pl?gene=ADA2</a>         |
| MT-ND4      | Mitochondrially Encoded NADH:Ubiquinone Oxidoreductase Core Subunit 4     | Protein coding | 33    | GCMTP010762  | 25.62470818     | <a href="https://www.genecards.org/cgi-bin/carddisp.pl?gene=MT-ND4">https://www.genecards.org/cgi-bin/carddisp.pl?gene=MT-ND4</a>     |
| MT-CO1      | Mitochondrially Encoded Cytochrome C Oxidase I                            | Protein coding | 34    | GCMTP005906  | 25.03742218     | <a href="https://www.genecards.org/cgi-bin/carddisp.pl?gene=MT-CO1">https://www.genecards.org/cgi-bin/carddisp.pl?gene=MT-CO1</a>     |
| PDE4D       | Phosphodiesterase 4D                                                      | Protein coding | 49    | GC05M058969  | 24.76003647     | <a href="https://www.genecards.org/cgi-bin/carddisp.pl?gene=PDE4D">https://www.genecards.org/cgi-bin/carddisp.pl?gene=PDE4D</a>       |
| ACTA2       | Actin $\alpha$ 2, Smooth Muscle                                           | Protein coding | 48    | GC10M088935  | 24.5772438      | <a href="https://www.genecards.org/cgi-bin/carddisp.pl?gene=ACTA2">https://www.genecards.org/cgi-bin/carddisp.pl?gene=ACTA2</a>       |
| PLAT        | Plasminogen Activator, Tissue Type                                        | Protein coding | 48    | GC08M042174  | 24.53118134     | <a href="https://www.genecards.org/cgi-bin/carddisp.pl?gene=PLAT">https://www.genecards.org/cgi-bin/carddisp.pl?gene=PLAT</a>         |
| NPPA        | Natriuretic Peptide A                                                     | Protein coding | 46    | GC01M011846  | 23.79712296     | <a href="https://www.genecards.org/cgi-bin/carddisp.pl?gene=NPPA">https://www.genecards.org/cgi-bin/carddisp.pl?gene=NPPA</a>         |
| MMP9        | Matrix Metallopeptidase 9                                                 | Protein coding | 53    | GC20P046008  | 23.73701859     | <a href="https://www.genecards.org/cgi-bin/carddisp.pl?gene=MMP9">https://www.genecards.org/cgi-bin/carddisp.pl?gene=MMP9</a>         |
| MT-ATP6     | Mitochondrially Encoded ATP Synthase Membrane Subunit 6                   | Protein coding | 33    | GCMTP008531  | 23.69134903     | <a href="https://www.genecards.org/cgi-bin/carddisp.pl?gene=MT-ATP6">https://www.genecards.org/cgi-bin/carddisp.pl?gene=MT-ATP6</a>   |
| SELP        | Selectin P                                                                | Protein coding | 45    | GC01M169558  | 23.62394524     | <a href="https://www.genecards.org/cgi-bin/carddisp.pl?gene=SELP">https://www.genecards.org/cgi-bin/carddisp.pl?gene=SELP</a>         |
| GLA         | Galactosidase $\alpha$                                                    | Protein coding | 48    | GC0XM101393  | 23.52035904     | <a href="https://www.genecards.org/cgi-bin/carddisp.pl?gene=GLA">https://www.genecards.org/cgi-bin/carddisp.pl?gene=GLA</a>           |
| NPPB        | Natriuretic Peptide B                                                     | Protein coding | 44    | GC01M011858  | 23.01249695     | <a href="https://www.genecards.org/cgi-bin/carddisp.pl?gene=NPPB">https://www.genecards.org/cgi-bin/carddisp.pl?gene=NPPB</a>         |
| CST3        | Cystatin C                                                                | Protein coding | 44    | GC20M023627  | 22.81313705     | <a href="https://www.genecards.org/cgi-bin/carddisp.pl?gene=CST3">https://www.genecards.org/cgi-bin/carddisp.pl?gene=CST3</a>         |
| PON1        | Paraoxonase 1                                                             | Protein coding | 45    | GC07M095297  | 22.61106491     | <a href="https://www.genecards.org/cgi-bin/carddisp.pl?gene=PON1">https://www.genecards.org/cgi-bin/carddisp.pl?gene=PON1</a>         |
| ADAMTS13    | ADAM Metallopeptidase With Thrombospondin Type 1 Motif 13                 | Protein coding | 46    | GC09P133414  | 22.60787201     | <a href="https://www.genecards.org/cgi-bin/carddisp.pl?gene=ADAMTS13">https://www.genecards.org/cgi-bin/carddisp.pl?gene=ADAMTS13</a> |
| IL1B        | Interleukin 1 $\beta$                                                     | Protein coding | 47    | GC02M112829  | 22.4975853      | <a href="https://www.genecards.org/cgi-bin/carddisp.pl?gene=IL1B">https://www.genecards.org/cgi-bin/carddisp.pl?gene=IL1B</a>         |
| HTRA1       | HtrA Serine Peptidase 1                                                   | Protein coding | 44    | GC10P122461  | 22.32984161     | <a href="https://www.genecards.org/cgi-bin/carddisp.pl?gene=HTRA1">https://www.genecards.org/cgi-bin/carddisp.pl?gene=HTRA1</a>       |
| RNF213      | Ring Finger Protein 213                                                   | Protein coding | 39    | GC17P080260  | 21.75890732     | <a href="https://www.genecards.org/cgi-bin/carddisp.pl?gene=RNF213">https://www.genecards.org/cgi-bin/carddisp.pl?gene=RNF213</a>     |
| VWF         | Von Willebrand Factor                                                     | Protein coding | 48    | GC12M005917  | 21.69753265     | <a href="https://www.genecards.org/cgi-bin/carddisp.pl?gene=VWF">https://www.genecards.org/cgi-bin/carddisp.pl?gene=VWF</a>           |
| APOH        | Apolipoprotein H                                                          | Protein coding | 43    | GC17M066212  | 21.60301971     | <a href="https://www.genecards.org/cgi-bin/carddisp.pl?gene=APOH">https://www.genecards.org/cgi-bin/carddisp.pl?gene=APOH</a>         |
| SERPINC1    | Serpin Family C Member 1                                                  | Protein coding | 48    | GC01M174280  | 21.58385849     | <a href="https://www.genecards.org/cgi-bin/carddisp.pl?gene=SERPINC1">https://www.genecards.org/cgi-bin/carddisp.pl?gene=SERPINC1</a> |
| JAK2        | Janus Kinase 2                                                            | Protein coding | 52    | GC09P004985  | 20.36562347     | <a href="https://www.genecards.org/cgi-bin/carddisp.pl?gene=JAK2">https://www.genecards.org/cgi-bin/carddisp.pl?gene=JAK2</a>         |
| COL4A2      | Collagen Type IV $\alpha$ 2 Chain                                         | Protein coding | 45    | GC13P110305  | 20.24249649     | <a href="https://www.genecards.org/cgi-bin/carddisp.pl?gene=COL4A2">https://www.genecards.org/cgi-bin/carddisp.pl?gene=COL4A2</a>     |
| MT-CO2      | Mitochondrially Encoded Cytochrome C Oxidase II                           | Protein coding | 34    | GCMTP007587  | 20.11138153     | <a href="https://www.genecards.org/cgi-bin/carddisp.pl?gene=MT-CO2">https://www.genecards.org/cgi-bin/carddisp.pl?gene=MT-CO2</a>     |
| MAPT        | Microtubule Associated Protein Tau                                        | Protein coding | 50    | GC17P045894  | 19.40291405     | <a href="https://www.genecards.org/cgi-bin/carddisp.pl?gene=MAPT">https://www.genecards.org/cgi-bin/carddisp.pl?gene=MAPT</a>         |
| BDNF        | Brain Derived Neurotrophic Factor                                         | Protein coding | 47    | GC11M027654  | 19.30661011     | <a href="https://www.genecards.org/cgi-bin/carddisp.pl?gene=BDNF">https://www.genecards.org/cgi-bin/carddisp.pl?gene=BDNF</a>         |
| VEGFA       | Vascular Endothelial Growth Factor A                                      | Protein coding | 48    | GC06P043770  | 19.18872643     | <a href="https://www.genecards.org/cgi-bin/carddisp.pl?gene=VEGFA">https://www.genecards.org/cgi-bin/carddisp.pl?gene=VEGFA</a>       |
| GUCY1A1     | Guanylate Cyclase 1 Soluble Subunit $\alpha$ 1                            | Protein coding | 37    | GC04P155667  | 19.14651299     | <a href="https://www.genecards.org/cgi-bin/carddisp.pl?gene=GUCY1A1">https://www.genecards.org/cgi-bin/carddisp.pl?gene=GUCY1A1</a>   |
| FGA         | Fibrinogen $\alpha$ Chain                                                 | Protein coding | 47    | GC04M154583  | 18.66513824     | <a href="https://www.genecards.org/cgi-bin/carddisp.pl?gene=FGA">https://www.genecards.org/cgi-bin/carddisp.pl?gene=FGA</a>           |
| APP         | Amyloid $\beta$ Precursor Protein                                         | Protein coding | 51    | GC21M025880  | 18.63409615     | <a href="https://www.genecards.org/cgi-bin/carddisp.pl?gene=APP">https://www.genecards.org/cgi-bin/carddisp.pl?gene=APP</a>           |
| APOB        | Apolipoprotein B                                                          | Protein coding | 45    | GC02M020956  | 18.51686859     | <a href="https://www.genecards.org/cgi-bin/carddisp.pl?gene=APOB">https://www.genecards.org/cgi-bin/carddisp.pl?gene=APOB</a>         |
| LPA         | Lipoprotein(A)                                                            | Protein coding | 42    | GC06M160531  | 18.04546738     | <a href="https://www.genecards.org/cgi-bin/carddisp.pl?gene=LPA">https://www.genecards.org/cgi-bin/carddisp.pl?gene=LPA</a>           |
| TLR4        | Toll Like Receptor 4                                                      | Protein coding | 50    | GC09P117704  | 17.89483643     | <a href="https://www.genecards.org/cgi-bin/carddisp.pl?gene=TLR4">https://www.genecards.org/cgi-bin/carddisp.pl?gene=TLR4</a>         |
| F7          | Coagulation Factor VII                                                    | Protein coding | 48    | GC13P113105  | 17.69317436     | <a href="https://www.genecards.org/cgi-bin/carddisp.pl?gene=F7">https://www.genecards.org/cgi-bin/carddisp.pl?gene=F7</a>             |
| MT-CO3      | Mitochondrially Encoded Cytochrome C Oxidase III                          | Protein coding | 31    | GCMTP009209  | 17.61222649     | <a href="https://www.genecards.org/cgi-bin/carddisp.pl?gene=MT-CO3">https://www.genecards.org/cgi-bin/carddisp.pl?gene=MT-CO3</a>     |
| PTGIS       | Prostaglandin I2 Synthase                                                 | Protein coding | 48    | GC20M049503  | 17.49741745     | <a href="https://www.genecards.org/cgi-bin/carddisp.pl?gene=PTGIS">https://www.genecards.org/cgi-bin/carddisp.pl?gene=PTGIS</a>       |
| F3          | Coagulation Factor III, Tissue Factor                                     | Protein coding | 44    | GC01M094530  | 17.4459877      | <a href="https://www.genecards.org/cgi-bin/carddisp.pl?gene=F3">https://www.genecards.org/cgi-bin/carddisp.pl?gene=F3</a>             |
| TP53        | Tumor Protein P53                                                         | Protein coding | 52    | GC17M007661  | 17.3061409      | <a href="https://www.genecards.org/cgi-bin/carddisp.pl?gene=TP53">https://www.genecards.org/cgi-bin/carddisp.pl?gene=TP53</a>         |
| EDNRA       | Endothelin Receptor Type A                                                | Protein coding | 50    | GC04P147480  | 17.12099648     | <a href="https://www.genecards.org/cgi-bin/carddisp.pl?gene=EDNRA">https://www.genecards.org/cgi-bin/carddisp.pl?gene=EDNRA</a>       |
| PLA2G7      | Phospholipase A2 Group VII                                                | Protein coding | 49    | GC06M049418  | 16.92056084     | <a href="https://www.genecards.org/cgi-bin/carddisp.pl?gene=PLA2G7">https://www.genecards.org/cgi-bin/carddisp.pl?gene=PLA2G7</a>     |
| ITGB3       | Integrin Subunit $\beta$ 3                                                | Protein coding | 50    | GC17P047254  | 16.74591255     | <a href="https://www.genecards.org/cgi-bin/carddisp.pl?gene=ITGB3">https://www.genecards.org/cgi-bin/carddisp.pl?gene=ITGB3</a>       |
| IL10        | Interleukin 10                                                            | Protein coding | 46    | GC01M206767  | 16.57954788     | <a href="https://www.genecards.org/cgi-bin/carddisp.pl?gene=IL10">https://www.genecards.org/cgi-bin/carddisp.pl?gene=IL10</a>         |
| ELN         | Elastin                                                                   | Protein coding | 45    | GC07P074027  | 16.47415161     | <a href="https://www.genecards.org/cgi-bin/carddisp.pl?gene=ELN">https://www.genecards.org/cgi-bin/carddisp.pl?gene=ELN</a>           |
| THBD        | Thrombomodulin                                                            | Protein coding | 44    | GC20M023026  | 16.29055405     | <a href="https://www.genecards.org/cgi-bin/carddisp.pl?gene=THBD">https://www.genecards.org/cgi-bin/carddisp.pl?gene=THBD</a>         |
| PON2        | Paraoxonase 2                                                             | Protein coding | 43    | GC07M095404  | 16.28116417     | <a href="https://www.genecards.org/cgi-bin/carddisp.pl?gene=PON2">https://www.genecards.org/cgi-bin/carddisp.pl?gene=PON2</a>         |
| CXCL12      | C-X-C Motif Chemokine Ligand 12                                           | Protein coding | 45    | GC10M044294  | 15.89864635     | <a href="https://www.genecards.org/cgi-bin/carddisp.pl?gene=CXCL12">https://www.genecards.org/cgi-bin/carddisp.pl?gene=CXCL12</a>     |
| CASP3       | Caspase 3                                                                 | Protein coding | 50    | GC04M184627  | 15.85417747     | <a href="https://www.genecards.org/cgi-bin/carddisp.pl?gene=CASP3">https://www.genecards.org/cgi-bin/carddisp.pl?gene=CASP3</a>       |
| ALB         | Albumin                                                                   | Protein coding | 49    | GC04P073397  | 15.84566689     | <a href="https://www.genecards.org/cgi-bin/carddisp.pl?gene=ALB">https://www.genecards.org/cgi-bin/carddisp.pl?gene=ALB</a>           |

|              |                                                                             |                |    |             |             |                                                                                                                                               |
|--------------|-----------------------------------------------------------------------------|----------------|----|-------------|-------------|-----------------------------------------------------------------------------------------------------------------------------------------------|
| PRKG1        | Protein Kinase CGMP-Dependent 1                                             | Protein coding | 51 | GC10P050991 | 15.79905701 | <a href="https://www.genecards.org/cgi-bin/carddisp.pl?gene=PRKG1">https://www.genecards.org/cgi-bin/carddisp.pl?gene=PRKG1</a>               |
| SERPINA3     | Serpin Family A Member 3                                                    | Protein coding | 43 | GC14P094612 | 15.64317131 | <a href="https://www.genecards.org/cgi-bin/carddisp.pl?gene=SERPINA3">https://www.genecards.org/cgi-bin/carddisp.pl?gene=SERPINA3</a>         |
| PROZ         | Protein Z, Vitamin K Dependent Plasma Glycoprotein                          | Protein coding | 40 | GC13P113158 | 15.55898571 | <a href="https://www.genecards.org/cgi-bin/carddisp.pl?gene=PROZ">https://www.genecards.org/cgi-bin/carddisp.pl?gene=PROZ</a>                 |
| LMNA         | Lamin A/C                                                                   | Protein coding | 48 | GC01P156082 | 15.4899826  | <a href="https://www.genecards.org/cgi-bin/carddisp.pl?gene=LMNA">https://www.genecards.org/cgi-bin/carddisp.pl?gene=LMNA</a>                 |
| REN          | Renin                                                                       | Protein coding | 47 | GC01M204154 | 15.44249725 | <a href="https://www.genecards.org/cgi-bin/carddisp.pl?gene=REN">https://www.genecards.org/cgi-bin/carddisp.pl?gene=REN</a>                   |
| EDN1         | Endothelin 1                                                                | Protein coding | 47 | GC06P012256 | 15.3421669  | <a href="https://www.genecards.org/cgi-bin/carddisp.pl?gene=EDN1">https://www.genecards.org/cgi-bin/carddisp.pl?gene=EDN1</a>                 |
| TGFB2        | Transforming Growth Factor $\beta$ 2                                        | Protein coding | 50 | GC01P218345 | 15.29639816 | <a href="https://www.genecards.org/cgi-bin/carddisp.pl?gene=TGFB2">https://www.genecards.org/cgi-bin/carddisp.pl?gene=TGFB2</a>               |
| SOD2         | Superoxide Dismutase 2                                                      | Protein coding | 50 | GC06M159669 | 15.27142048 | <a href="https://www.genecards.org/cgi-bin/carddisp.pl?gene=SOD2">https://www.genecards.org/cgi-bin/carddisp.pl?gene=SOD2</a>                 |
| VKORC1       | Vitamin K Epoxide Reductase Complex Subunit 1                               | Protein coding | 47 | GC16M031814 | 15.22452354 | <a href="https://www.genecards.org/cgi-bin/carddisp.pl?gene=VKORC1">https://www.genecards.org/cgi-bin/carddisp.pl?gene=VKORC1</a>             |
| CDKN2B-AS1   | CDKN2B Antisense RNA 1                                                      | Protein coding | 22 | GC09P021994 | 15.21159935 | <a href="https://www.genecards.org/cgi-bin/carddisp.pl?gene=CDKN2B-AS1">https://www.genecards.org/cgi-bin/carddisp.pl?gene=CDKN2B-AS1</a>     |
| MYH11        | Myosin Heavy Chain 11                                                       | Protein coding | 45 | GC16M015704 | 15.14138603 | <a href="https://www.genecards.org/cgi-bin/carddisp.pl?gene=MYH11">https://www.genecards.org/cgi-bin/carddisp.pl?gene=MYH11</a>               |
| ENO2         | Enolase 2                                                                   | Protein coding | 47 | GC12P006913 | 14.98089409 | <a href="https://www.genecards.org/cgi-bin/carddisp.pl?gene=ENO2">https://www.genecards.org/cgi-bin/carddisp.pl?gene=ENO2</a>                 |
| RNF213-AS1   | RNF213 Antisense RNA 1                                                      | Protein coding | 12 | GC17M080335 | 14.97168064 | <a href="https://www.genecards.org/cgi-bin/carddisp.pl?gene=RNF213-AS1">https://www.genecards.org/cgi-bin/carddisp.pl?gene=RNF213-AS1</a>     |
| FGB          | Fibrinogen $\beta$ Chain                                                    | Protein coding | 46 | GC04P154575 | 14.83216286 | <a href="https://www.genecards.org/cgi-bin/carddisp.pl?gene=FGB">https://www.genecards.org/cgi-bin/carddisp.pl?gene=FGB</a>                   |
| ACTA2-AS1    | ACTA2 Antisense RNA 1                                                       | Protein coding | 16 | GC10P088932 | 14.55962944 | <a href="https://www.genecards.org/cgi-bin/carddisp.pl?gene=ACTA2-AS1">https://www.genecards.org/cgi-bin/carddisp.pl?gene=ACTA2-AS1</a>       |
| P2RY12       | Purinergic Receptor P2Y12                                                   | Protein coding | 48 | GC03M151336 | 14.55374718 | <a href="https://www.genecards.org/cgi-bin/carddisp.pl?gene=P2RY12">https://www.genecards.org/cgi-bin/carddisp.pl?gene=P2RY12</a>             |
| LOX          | Lysyl Oxidase                                                               | Protein coding | 45 | GC05M122063 | 14.39517784 | <a href="https://www.genecards.org/cgi-bin/carddisp.pl?gene=LOX">https://www.genecards.org/cgi-bin/carddisp.pl?gene=LOX</a>                   |
| ABCA1        | ATP Binding Cassette Subfamily A Member 1                                   | Protein coding | 47 | GC09M104781 | 14.16120148 | <a href="https://www.genecards.org/cgi-bin/carddisp.pl?gene=ABCA1">https://www.genecards.org/cgi-bin/carddisp.pl?gene=ABCA1</a>               |
| COL3A1       | Collagen Type III $\alpha$ 1 Chain                                          | Protein coding | 46 | GC02P188974 | 14.1514473  | <a href="https://www.genecards.org/cgi-bin/carddisp.pl?gene=COL3A1">https://www.genecards.org/cgi-bin/carddisp.pl?gene=COL3A1</a>             |
| HIF1A        | Hypoxia Inducible Factor 1 Subunit $\alpha$                                 | Protein coding | 47 | GC14P061695 | 14.12484455 | <a href="https://www.genecards.org/cgi-bin/carddisp.pl?gene=HIF1A">https://www.genecards.org/cgi-bin/carddisp.pl?gene=HIF1A</a>               |
| ALOX5        | Arachidonate 5-Lipoxygenase                                                 | Protein coding | 49 | GC10P045374 | 14.11089516 | <a href="https://www.genecards.org/cgi-bin/carddisp.pl?gene=ALOX5">https://www.genecards.org/cgi-bin/carddisp.pl?gene=ALOX5</a>               |
| F10          | Coagulation Factor X                                                        | Protein coding | 48 | GC13P113122 | 14.10568523 | <a href="https://www.genecards.org/cgi-bin/carddisp.pl?gene=F10">https://www.genecards.org/cgi-bin/carddisp.pl?gene=F10</a>                   |
| PECAM1       | Platelet And Endothelial Cell Adhesion Molecule 1                           | Protein coding | 40 | GC17M064319 | 14.0573988  | <a href="https://www.genecards.org/cgi-bin/carddisp.pl?gene=PECAM1">https://www.genecards.org/cgi-bin/carddisp.pl?gene=PECAM1</a>             |
| OLR1         | Oxidized Low Density Lipoprotein Receptor 1                                 | Protein coding | 43 | GC12M016311 | 13.89896107 | <a href="https://www.genecards.org/cgi-bin/carddisp.pl?gene=OLR1">https://www.genecards.org/cgi-bin/carddisp.pl?gene=OLR1</a>                 |
| HMGCR        | 3-Hydroxy-3-Methylglutaryl-CoA Reductase                                    | Protein coding | 46 | GC05P075336 | 13.89016724 | <a href="https://www.genecards.org/cgi-bin/carddisp.pl?gene=HMGCR">https://www.genecards.org/cgi-bin/carddisp.pl?gene=HMGCR</a>               |
| SMAD3        | SMAD Family Member 3                                                        | Protein coding | 49 | GC15P067063 | 13.82665634 | <a href="https://www.genecards.org/cgi-bin/carddisp.pl?gene=SMAD3">https://www.genecards.org/cgi-bin/carddisp.pl?gene=SMAD3</a>               |
| SELE         | Selectin E                                                                  | Protein coding | 43 | GC01M169722 | 13.78046322 | <a href="https://www.genecards.org/cgi-bin/carddisp.pl?gene=SELE">https://www.genecards.org/cgi-bin/carddisp.pl?gene=SELE</a>                 |
| MYLK         | Myosin Light Chain Kinase                                                   | Protein coding | 52 | GC03M123610 | 13.77758121 | <a href="https://www.genecards.org/cgi-bin/carddisp.pl?gene=MYLK">https://www.genecards.org/cgi-bin/carddisp.pl?gene=MYLK</a>                 |
| ADM          | Adrenomedullin                                                              | Protein coding | 44 | GC11P010304 | 13.70690346 | <a href="https://www.genecards.org/cgi-bin/carddisp.pl?gene=ADM">https://www.genecards.org/cgi-bin/carddisp.pl?gene=ADM</a>                   |
| LOC102723566 | Uncharacterized LOC102723566                                                | RNA gene       | 10 | GC09P127816 | 13.5931921  | <a href="https://www.genecards.org/cgi-bin/carddisp.pl?gene=LOC102723566">https://www.genecards.org/cgi-bin/carddisp.pl?gene=LOC102723566</a> |
| ACVRL1       | Activin A Receptor Like Type 1                                              | Protein coding | 49 | GC12P051906 | 13.59162807 | <a href="https://www.genecards.org/cgi-bin/carddisp.pl?gene=ACVRL1">https://www.genecards.org/cgi-bin/carddisp.pl?gene=ACVRL1</a>             |
| ANGPT1       | Angiopietin 1                                                               | Protein coding | 45 | GC08M107246 | 13.52841187 | <a href="https://www.genecards.org/cgi-bin/carddisp.pl?gene=ANGPT1">https://www.genecards.org/cgi-bin/carddisp.pl?gene=ANGPT1</a>             |
| SMAD4        | SMAD Family Member 4                                                        | Protein coding | 50 | GC18P051028 | 13.49933338 | <a href="https://www.genecards.org/cgi-bin/carddisp.pl?gene=SMAD4">https://www.genecards.org/cgi-bin/carddisp.pl?gene=SMAD4</a>               |
| GSR          | Glutathione-Disulfide Reductase                                             | Protein coding | 49 | GC08M030678 | 13.48409271 | <a href="https://www.genecards.org/cgi-bin/carddisp.pl?gene=GSR">https://www.genecards.org/cgi-bin/carddisp.pl?gene=GSR</a>                   |
| TGFBR2       | Transforming Growth Factor $\beta$ Receptor 2                               | Protein coding | 50 | GC03P030623 | 13.40212059 | <a href="https://www.genecards.org/cgi-bin/carddisp.pl?gene=TGFBR2">https://www.genecards.org/cgi-bin/carddisp.pl?gene=TGFBR2</a>             |
| PROCR        | Protein C Receptor                                                          | Protein coding | 41 | GC20P035252 | 13.36319256 | <a href="https://www.genecards.org/cgi-bin/carddisp.pl?gene=PROCR">https://www.genecards.org/cgi-bin/carddisp.pl?gene=PROCR</a>               |
| F2R          | Coagulation Factor II Thrombin Receptor                                     | Protein coding | 47 | GC05P076716 | 13.35517311 | <a href="https://www.genecards.org/cgi-bin/carddisp.pl?gene=F2R">https://www.genecards.org/cgi-bin/carddisp.pl?gene=F2R</a>                   |
| SLC2A10      | Solute Carrier Family 2 Member 10                                           | Protein coding | 44 | GC20P046709 | 13.31521225 | <a href="https://www.genecards.org/cgi-bin/carddisp.pl?gene=SLC2A10">https://www.genecards.org/cgi-bin/carddisp.pl?gene=SLC2A10</a>           |
| NGB          | Neuroglobin                                                                 | Protein coding | 37 | GC14M077265 | 13.23265076 | <a href="https://www.genecards.org/cgi-bin/carddisp.pl?gene=NGB">https://www.genecards.org/cgi-bin/carddisp.pl?gene=NGB</a>                   |
| PSEN1        | Presenilin 1                                                                | Protein coding | 52 | GC14P073136 | 13.22008133 | <a href="https://www.genecards.org/cgi-bin/carddisp.pl?gene=PSEN1">https://www.genecards.org/cgi-bin/carddisp.pl?gene=PSEN1</a>               |
| ICAM1        | Intercellular Adhesion Molecule 1                                           | Protein coding | 50 | GC19P010270 | 13.21998024 | <a href="https://www.genecards.org/cgi-bin/carddisp.pl?gene=ICAM1">https://www.genecards.org/cgi-bin/carddisp.pl?gene=ICAM1</a>               |
| ADIPOQ       | Adiponectin, C1Q And Collagen Domain Containing                             | Protein coding | 44 | GC03P186842 | 13.16485596 | <a href="https://www.genecards.org/cgi-bin/carddisp.pl?gene=ADIPOQ">https://www.genecards.org/cgi-bin/carddisp.pl?gene=ADIPOQ</a>             |
| TGFBR1       | Transforming Growth Factor $\beta$ Receptor 1                               | Protein coding | 52 | GC09P099104 | 13.15031433 | <a href="https://www.genecards.org/cgi-bin/carddisp.pl?gene=TGFBR1">https://www.genecards.org/cgi-bin/carddisp.pl?gene=TGFBR1</a>             |
| PF4          | Platelet Factor 4                                                           | Protein coding | 41 | GC04M073980 | 13.14593506 | <a href="https://www.genecards.org/cgi-bin/carddisp.pl?gene=PF4">https://www.genecards.org/cgi-bin/carddisp.pl?gene=PF4</a>                   |
| HSPA4        | Heat Shock Protein Family A (Hsp70) Member 4                                | Protein coding | 42 | GC05P133051 | 13.03904343 | <a href="https://www.genecards.org/cgi-bin/carddisp.pl?gene=HSPA4">https://www.genecards.org/cgi-bin/carddisp.pl?gene=HSPA4</a>               |
| ENPP1        | Ectonucleotide Pyrophosphatase/Phosphodiesterase 1                          | Protein coding | 47 | GC06P131808 | 13.03814125 | <a href="https://www.genecards.org/cgi-bin/carddisp.pl?gene=ENPP1">https://www.genecards.org/cgi-bin/carddisp.pl?gene=ENPP1</a>               |
| AVP          | Arginine Vasopressin                                                        | Protein coding | 46 | GC20M003082 | 12.99696922 | <a href="https://www.genecards.org/cgi-bin/carddisp.pl?gene=AVP">https://www.genecards.org/cgi-bin/carddisp.pl?gene=AVP</a>                   |
| SH2B3        | SH2B Adaptor Protein 3                                                      | Protein coding | 47 | GC12P111405 | 12.94278908 | <a href="https://www.genecards.org/cgi-bin/carddisp.pl?gene=SH2B3">https://www.genecards.org/cgi-bin/carddisp.pl?gene=SH2B3</a>               |
| PIK3C2A      | Phosphatidylinositol-4-Phosphate 3-Kinase Catalytic Subunit Type 2 $\alpha$ | Protein coding | 47 | GC11M017305 | 12.84323406 | <a href="https://www.genecards.org/cgi-bin/carddisp.pl?gene=PIK3C2A">https://www.genecards.org/cgi-bin/carddisp.pl?gene=PIK3C2A</a>           |
| AQP4         | Aquaporin 4                                                                 | Protein coding | 46 | GC18M026852 | 12.82839203 | <a href="https://www.genecards.org/cgi-bin/carddisp.pl?gene=AQP4">https://www.genecards.org/cgi-bin/carddisp.pl?gene=AQP4</a>                 |
| PLG          | Plasminogen                                                                 | Protein coding | 48 | GC06P160702 | 12.79783726 | <a href="https://www.genecards.org/cgi-bin/carddisp.pl?gene=PLG">https://www.genecards.org/cgi-bin/carddisp.pl?gene=PLG</a>                   |
| HMGB1        | High Mobility Group Box 1                                                   | Protein coding | 44 | GC13M030456 | 12.78829098 | <a href="https://www.genecards.org/cgi-bin/carddisp.pl?gene=HMGB1">https://www.genecards.org/cgi-bin/carddisp.pl?gene=HMGB1</a>               |
| CYCS         | Cytochrome C, Somatic                                                       | Protein coding | 48 | GC07M025118 | 12.77298927 | <a href="https://www.genecards.org/cgi-bin/carddisp.pl?gene=CYCS">https://www.genecards.org/cgi-bin/carddisp.pl?gene=CYCS</a>                 |
| MAP2         | Microtubule Associated Protein 2                                            | Protein coding | 43 | GC02P209424 | 12.70368385 | <a href="https://www.genecards.org/cgi-bin/carddisp.pl?gene=MAP2">https://www.genecards.org/cgi-bin/carddisp.pl?gene=MAP2</a>                 |
| ADORA1       | Adenosine A1 Receptor                                                       | Protein coding | 47 | GC01P203090 | 12.59196568 | <a href="https://www.genecards.org/cgi-bin/carddisp.pl?gene=ADORA1">https://www.genecards.org/cgi-bin/carddisp.pl?gene=ADORA1</a>             |
| MPL          | MPL Proto-Oncogene, Thrombopoietin Receptor                                 | Protein coding | 47 | GC01P043337 | 12.57350922 | <a href="https://www.genecards.org/cgi-bin/carddisp.pl?gene=MPL">https://www.genecards.org/cgi-bin/carddisp.pl?gene=MPL</a>                   |
| KCNQ1        | Potassium Voltage-Gated Channel Subfamily Q Member 1                        | Protein coding | 50 | GC11P002444 | 12.48999119 | <a href="https://www.genecards.org/cgi-bin/carddisp.pl?gene=KCNQ1">https://www.genecards.org/cgi-bin/carddisp.pl?gene=KCNQ1</a>               |
| INS          | Insulin                                                                     | Protein coding | 47 | GC11M002159 | 12.48485756 | <a href="https://www.genecards.org/cgi-bin/carddisp.pl?gene=INS">https://www.genecards.org/cgi-bin/carddisp.pl?gene=INS</a>                   |
| TTR          | Transthyretin                                                               | Protein coding | 48 | GC18P031557 | 12.4522953  | <a href="https://www.genecards.org/cgi-bin/carddisp.pl?gene=TTR">https://www.genecards.org/cgi-bin/carddisp.pl?gene=TTR</a>                   |
| CREB1        | CAMP Responsive Element Binding Protein 1                                   | Protein coding | 49 | GC02P207529 | 12.40608215 | <a href="https://www.genecards.org/cgi-bin/carddisp.pl?gene=CREB1">https://www.genecards.org/cgi-bin/carddisp.pl?gene=CREB1</a>               |
| GJA1         | Gap Junction Protein $\alpha$ 1                                             | Protein coding | 51 | GC06P121436 | 12.35748196 | <a href="https://www.genecards.org/cgi-bin/carddisp.pl?gene=GJA1">https://www.genecards.org/cgi-bin/carddisp.pl?gene=GJA1</a>                 |
| GNB3         | G Protein Subunit $\beta$ 3                                                 | Protein coding | 47 | GC12P006839 | 12.33969212 | <a href="https://www.genecards.org/cgi-bin/carddisp.pl?gene=GNB3">https://www.genecards.org/cgi-bin/carddisp.pl?gene=GNB3</a>                 |
| F9           | Coagulation Factor IX                                                       | Protein coding | 47 | GC0XP139530 | 12.32289028 | <a href="https://www.genecards.org/cgi-bin/carddisp.pl?gene=F9">https://www.genecards.org/cgi-bin/carddisp.pl?gene=F9</a>                     |
| AKT1         | AKT Serine/Threonine Kinase 1                                               | Protein coding | 53 | GC14M104769 | 12.30043602 | <a href="https://www.genecards.org/cgi-bin/carddisp.pl?gene=AKT1">https://www.genecards.org/cgi-bin/carddisp.pl?gene=AKT1</a>                 |
| TNNI3        | Troponin I3, Cardiac Type                                                   | Protein coding | 48 | GC19M055151 | 12.2371664  | <a href="https://www.genecards.org/cgi-bin/carddisp.pl?gene=TNNI3">https://www.genecards.org/cgi-bin/carddisp.pl?gene=TNNI3</a>               |
| TNNT2        | Troponin T2, Cardiac Type                                                   | Protein coding | 49 | GC01M201359 | 12.22701263 | <a href="https://www.genecards.org/cgi-bin/carddisp.pl?gene=TNNT2">https://www.genecards.org/cgi-bin/carddisp.pl?gene=TNNT2</a>               |
| PPBP         | Pro-Platelet Basic Protein                                                  | Protein coding | 43 | GC04M073986 | 12.16885948 | <a href="https://www.genecards.org/cgi-bin/carddisp.pl?gene=PPBP">https://www.genecards.org/cgi-bin/carddisp.pl?gene=PPBP</a>                 |
| ABCC6        | ATP Binding Cassette Subfamily C Member 6                                   | Protein coding | 46 | GC16M016148 | 12.12478065 | <a href="https://www.genecards.org/cgi-bin/carddisp.pl?gene=ABCC6">https://www.genecards.org/cgi-bin/carddisp.pl?gene=ABCC6</a>               |
| MB           | Myoglobin                                                                   | Protein coding | 43 | GC22M035606 | 12.11946297 | <a href="https://www.genecards.org/cgi-bin/carddisp.pl?gene=MB">https://www.genecards.org/cgi-bin/carddisp.pl?gene=MB</a>                     |
| LPL          | Lipoprotein Lipase                                                          | Protein coding | 49 | GC08P019901 | 12.08930969 | <a href="https://www.genecards.org/cgi-bin/carddisp.pl?gene=LPL">https://www.genecards.org/cgi-bin/carddisp.pl?gene=LPL</a>                   |
| EPOR         | Erythropoietin Receptor                                                     | Protein coding | 47 | GC19M011377 | 12.07604027 | <a href="https://www.genecards.org/cgi-bin/carddisp.pl?gene=EPOR">https://www.genecards.org/cgi-bin/carddisp.pl?gene=EPOR</a>                 |
| TNFRSF1A     | TNF Receptor Superfamily Member 1A                                          | Protein coding | 48 | GC12M006328 | 12.07574844 | <a href="https://www.genecards.org/cgi-bin/carddisp.pl?gene=TNFRSF1A">https://www.genecards.org/cgi-bin/carddisp.pl?gene=TNFRSF1A</a>         |
| APOA1        | Apolipoprotein A1                                                           | Protein coding | 48 | GC11M116835 | 12.05739212 | <a href="https://www.genecards.org/cgi-bin/carddisp.pl?gene=APOA1">https://www.genecards.org/cgi-bin/carddisp.pl?gene=APOA1</a>               |
| SLC1A2       | Solute Carrier Family 1 Member 2                                            | Protein coding | 50 | GC11M035252 | 12.04760075 | <a href="https://www.genecards.org/cgi-bin/carddisp.pl?gene=SLC1A2">https://www.genecards.org/cgi-bin/carddisp.pl?gene=SLC1A2</a>             |
| CCL2         | C-C Motif Chemokine Ligand 2                                                | Protein coding | 48 | GC17P034255 | 12.04722977 | <a href="https://www.genecards.org/cgi-bin/carddisp.pl?gene=CCL2">https://www.genecards.org/cgi-bin/carddisp.pl?gene=CCL2</a>                 |
| SERPINI1     | Serpin Family I Member 1                                                    | Protein coding | 45 | GC03P167735 | 12.00961876 | <a href="https://www.genecards.org/cgi-bin/carddisp.pl?gene=SERPINI1">https://www.genecards.org/cgi-bin/carddisp.pl?gene=SERPINI1</a>         |

|                |                                                                |                |    |             |             |                                                                                                                                                   |
|----------------|----------------------------------------------------------------|----------------|----|-------------|-------------|---------------------------------------------------------------------------------------------------------------------------------------------------|
| MALAT1         | Metastasis Associated Lung Adenocarcinoma Transcript 1         | RNA gene       | 23 | GC11P066818 | 11.88642883 | <a href="https://www.genecards.org/cgi-bin/carddisp.pl?gene=MALAT1">https://www.genecards.org/cgi-bin/carddisp.pl?gene=MALAT1</a>                 |
| EDNRB          | Endothelin Receptor Type B                                     | Protein coding | 50 | GC13M077895 | 11.85520554 | <a href="https://www.genecards.org/cgi-bin/carddisp.pl?gene=EDNRB">https://www.genecards.org/cgi-bin/carddisp.pl?gene=EDNRB</a>                   |
| CASP1          | Caspase 1                                                      | Protein coding | 50 | GC11M105025 | 11.79752064 | <a href="https://www.genecards.org/cgi-bin/carddisp.pl?gene=CASP1">https://www.genecards.org/cgi-bin/carddisp.pl?gene=CASP1</a>                   |
| SERPINF2       | Serpin Family F Member 2                                       | Protein coding | 44 | GC17P001742 | 11.78234291 | <a href="https://www.genecards.org/cgi-bin/carddisp.pl?gene=SERPINF2">https://www.genecards.org/cgi-bin/carddisp.pl?gene=SERPINF2</a>             |
| IGF1           | Insulin Like Growth Factor 1                                   | Protein coding | 49 | GC12M102395 | 11.75992775 | <a href="https://www.genecards.org/cgi-bin/carddisp.pl?gene=IGF1">https://www.genecards.org/cgi-bin/carddisp.pl?gene=IGF1</a>                     |
| CXCR4          | C-X-C Motif Chemokine Receptor 4                               | Protein coding | 52 | GC02M136114 | 11.75244522 | <a href="https://www.genecards.org/cgi-bin/carddisp.pl?gene=CXCR4">https://www.genecards.org/cgi-bin/carddisp.pl?gene=CXCR4</a>                   |
| GATA4          | GATA Binding Protein 4                                         | Protein coding | 48 | GC08P011676 | 11.74405861 | <a href="https://www.genecards.org/cgi-bin/carddisp.pl?gene=GATA4">https://www.genecards.org/cgi-bin/carddisp.pl?gene=GATA4</a>                   |
| MT-CYB         | Mitochondrially Encoded Cytochrome B                           | Protein coding | 32 | GCMTPO14749 | 11.74324512 | <a href="https://www.genecards.org/cgi-bin/carddisp.pl?gene=MT-CYB">https://www.genecards.org/cgi-bin/carddisp.pl?gene=MT-CYB</a>                 |
| SULT1A3        | Sulfotransferase Family 1A Member 3                            | Protein coding | 38 | GC16P030199 | 11.71180916 | <a href="https://www.genecards.org/cgi-bin/carddisp.pl?gene=SULT1A3">https://www.genecards.org/cgi-bin/carddisp.pl?gene=SULT1A3</a>               |
| HSPA8          | Heat Shock Protein Family A (Hsp70) Member 8                   | Protein coding | 47 | GC11M123057 | 11.67529488 | <a href="https://www.genecards.org/cgi-bin/carddisp.pl?gene=HSPA8">https://www.genecards.org/cgi-bin/carddisp.pl?gene=HSPA8</a>                   |
| MBP            | Myelin Basic Protein                                           | Protein coding | 44 | GC18M076978 | 11.5817337  | <a href="https://www.genecards.org/cgi-bin/carddisp.pl?gene=MBP">https://www.genecards.org/cgi-bin/carddisp.pl?gene=MBP</a>                       |
| GP6            | Glycoprotein VI Platelet                                       | Protein coding | 44 | GC19M055013 | 11.57354355 | <a href="https://www.genecards.org/cgi-bin/carddisp.pl?gene=GP6">https://www.genecards.org/cgi-bin/carddisp.pl?gene=GP6</a>                       |
| NES            | Nestin                                                         | Protein coding | 40 | GC01M156668 | 11.54577065 | <a href="https://www.genecards.org/cgi-bin/carddisp.pl?gene=NES">https://www.genecards.org/cgi-bin/carddisp.pl?gene=NES</a>                       |
| ADD1           | Adducin 1                                                      | Protein coding | 44 | GC04P002855 | 11.49605179 | <a href="https://www.genecards.org/cgi-bin/carddisp.pl?gene=ADD1">https://www.genecards.org/cgi-bin/carddisp.pl?gene=ADD1</a>                     |
| AOC3           | Amine Oxidase Copper Containing 3                              | Protein coding | 44 | GC17P042851 | 11.48252106 | <a href="https://www.genecards.org/cgi-bin/carddisp.pl?gene=AOC3">https://www.genecards.org/cgi-bin/carddisp.pl?gene=AOC3</a>                     |
| PPARG          | Peroxisome Proliferator Activated Receptor $\gamma$            | Protein coding | 52 | GC03P012287 | 11.4636364  | <a href="https://www.genecards.org/cgi-bin/carddisp.pl?gene=PPARG">https://www.genecards.org/cgi-bin/carddisp.pl?gene=PPARG</a>                   |
| THPO           | Thrombopoietin                                                 | Protein coding | 41 | GC03M184371 | 11.44934082 | <a href="https://www.genecards.org/cgi-bin/carddisp.pl?gene=THPO">https://www.genecards.org/cgi-bin/carddisp.pl?gene=THPO</a>                     |
| GDNF           | Glial Cell Derived Neurotrophic Factor                         | Protein coding | 47 | GC05M037812 | 11.44526005 | <a href="https://www.genecards.org/cgi-bin/carddisp.pl?gene=GDNF">https://www.genecards.org/cgi-bin/carddisp.pl?gene=GDNF</a>                     |
| ITGA2          | Integrin Subunit $\alpha$ 2                                    | Protein coding | 45 | GC05P052989 | 11.40814972 | <a href="https://www.genecards.org/cgi-bin/carddisp.pl?gene=ITGA2">https://www.genecards.org/cgi-bin/carddisp.pl?gene=ITGA2</a>                   |
| ESR1           | Estrogen Receptor 1                                            | Protein coding | 52 | GC06P151656 | 11.40275574 | <a href="https://www.genecards.org/cgi-bin/carddisp.pl?gene=ESR1">https://www.genecards.org/cgi-bin/carddisp.pl?gene=ESR1</a>                     |
| F13A1          | Coagulation Factor XIII A Chain                                | Protein coding | 46 | GC06M006144 | 11.3861618  | <a href="https://www.genecards.org/cgi-bin/carddisp.pl?gene=F13A1">https://www.genecards.org/cgi-bin/carddisp.pl?gene=F13A1</a>                   |
| TET2           | Tet Methylcytosine Dioxygenase 2                               | Protein coding | 44 | GC04P105145 | 11.38082504 | <a href="https://www.genecards.org/cgi-bin/carddisp.pl?gene=TET2">https://www.genecards.org/cgi-bin/carddisp.pl?gene=TET2</a>                     |
| TH             | Tyrosine Hydroxylase                                           | Protein coding | 52 | GC11M002163 | 11.34387398 | <a href="https://www.genecards.org/cgi-bin/carddisp.pl?gene=TH">https://www.genecards.org/cgi-bin/carddisp.pl?gene=TH</a>                         |
| VCAM1          | Vascular Cell Adhesion Molecule 1                              | Protein coding | 45 | GC01P100719 | 11.31287289 | <a href="https://www.genecards.org/cgi-bin/carddisp.pl?gene=VCAM1">https://www.genecards.org/cgi-bin/carddisp.pl?gene=VCAM1</a>                   |
| TSPO           | Translocator Protein                                           | Protein coding | 43 | GC22P043151 | 11.30289841 | <a href="https://www.genecards.org/cgi-bin/carddisp.pl?gene=TSPO">https://www.genecards.org/cgi-bin/carddisp.pl?gene=TSPO</a>                     |
| CCL3           | C-C Motif Chemokine Ligand 3                                   | Protein coding | 39 | GC17M036088 | 11.2669239  | <a href="https://www.genecards.org/cgi-bin/carddisp.pl?gene=CCL3">https://www.genecards.org/cgi-bin/carddisp.pl?gene=CCL3</a>                     |
| BMP7           | Bone Morphogenetic Protein 7                                   | Protein coding | 45 | GC20M057168 | 11.23011589 | <a href="https://www.genecards.org/cgi-bin/carddisp.pl?gene=BMP7">https://www.genecards.org/cgi-bin/carddisp.pl?gene=BMP7</a>                     |
| SIRT1          | Sirtuin 1                                                      | Protein coding | 48 | GC10P067884 | 11.18833351 | <a href="https://www.genecards.org/cgi-bin/carddisp.pl?gene=SIRT1">https://www.genecards.org/cgi-bin/carddisp.pl?gene=SIRT1</a>                   |
| ANXA5          | Annexin A5                                                     | Protein coding | 45 | GC04M121667 | 11.17113304 | <a href="https://www.genecards.org/cgi-bin/carddisp.pl?gene=ANXA5">https://www.genecards.org/cgi-bin/carddisp.pl?gene=ANXA5</a>                   |
| CALR           | Calreticulin                                                   | Protein coding | 50 | GC19P012938 | 11.14026451 | <a href="https://www.genecards.org/cgi-bin/carddisp.pl?gene=CALR">https://www.genecards.org/cgi-bin/carddisp.pl?gene=CALR</a>                     |
| CXCL8          | C-X-C Motif Chemokine Ligand 8                                 | Protein coding | 40 | GC04P073740 | 11.12573338 | <a href="https://www.genecards.org/cgi-bin/carddisp.pl?gene=CXCL8">https://www.genecards.org/cgi-bin/carddisp.pl?gene=CXCL8</a>                   |
| TGFB3          | Transforming Growth Factor $\beta$ 3                           | Protein coding | 46 | GC14M075958 | 11.03636169 | <a href="https://www.genecards.org/cgi-bin/carddisp.pl?gene=TGFB3">https://www.genecards.org/cgi-bin/carddisp.pl?gene=TGFB3</a>                   |
| HBA1           | Hemoglobin Subunit $\alpha$ 1                                  | Protein coding | 42 | GC16P006099 | 11.00537872 | <a href="https://www.genecards.org/cgi-bin/carddisp.pl?gene=HBA1">https://www.genecards.org/cgi-bin/carddisp.pl?gene=HBA1</a>                     |
| CYP2C19        | Cytochrome P450 Family 2 Subfamily C Member 19                 | Protein coding | 48 | GC10P094762 | 10.97634506 | <a href="https://www.genecards.org/cgi-bin/carddisp.pl?gene=CYP2C19">https://www.genecards.org/cgi-bin/carddisp.pl?gene=CYP2C19</a>               |
| TBXA2R         | Thromboxane A2 Receptor                                        | Protein coding | 48 | GC19M003594 | 10.97619057 | <a href="https://www.genecards.org/cgi-bin/carddisp.pl?gene=TBXA2R">https://www.genecards.org/cgi-bin/carddisp.pl?gene=TBXA2R</a>                 |
| PTGS2          | Prostaglandin-Endoperoxide Synthase 2                          | Protein coding | 48 | GC01M186640 | 10.94750023 | <a href="https://www.genecards.org/cgi-bin/carddisp.pl?gene=PTGS2">https://www.genecards.org/cgi-bin/carddisp.pl?gene=PTGS2</a>                   |
| TREX1          | Three Prime Repair Exonuclease 1                               | Protein coding | 42 | GC03P048466 | 10.9351368  | <a href="https://www.genecards.org/cgi-bin/carddisp.pl?gene=TREX1">https://www.genecards.org/cgi-bin/carddisp.pl?gene=TREX1</a>                   |
| SPP1           | Secreted Phosphoprotein 1                                      | Protein coding | 45 | GC04P087975 | 10.87703323 | <a href="https://www.genecards.org/cgi-bin/carddisp.pl?gene=SPP1">https://www.genecards.org/cgi-bin/carddisp.pl?gene=SPP1</a>                     |
| NKX2-5         | NK2 Homeobox 5                                                 | Protein coding | 45 | GC05M173232 | 10.74535275 | <a href="https://www.genecards.org/cgi-bin/carddisp.pl?gene=NKX2-5">https://www.genecards.org/cgi-bin/carddisp.pl?gene=NKX2-5</a>                 |
| ENTPD1         | Ectonucleoside Triphosphate Diphosphohydrolase 1               | Protein coding | 47 | GC10P095711 | 10.72510052 | <a href="https://www.genecards.org/cgi-bin/carddisp.pl?gene=ENTPD1">https://www.genecards.org/cgi-bin/carddisp.pl?gene=ENTPD1</a>                 |
| ACTC1          | Actin $\alpha$ Cardiac Muscle 1                                | Protein coding | 43 | GC15M034790 | 10.69788551 | <a href="https://www.genecards.org/cgi-bin/carddisp.pl?gene=ACTC1">https://www.genecards.org/cgi-bin/carddisp.pl?gene=ACTC1</a>                   |
| MFAP5          | Microfibril Associated Protein 5                               | Protein coding | 41 | GC12M008637 | 10.65945816 | <a href="https://www.genecards.org/cgi-bin/carddisp.pl?gene=MFAP5">https://www.genecards.org/cgi-bin/carddisp.pl?gene=MFAP5</a>                   |
| F12            | Coagulation Factor XII                                         | Protein coding | 48 | GC05M177402 | 10.64008427 | <a href="https://www.genecards.org/cgi-bin/carddisp.pl?gene=F12">https://www.genecards.org/cgi-bin/carddisp.pl?gene=F12</a>                       |
| NFE2L2         | Nuclear Factor, Erythroid 2 Like 2                             | Protein coding | 48 | GC02M177227 | 10.58923149 | <a href="https://www.genecards.org/cgi-bin/carddisp.pl?gene=NFE2L2">https://www.genecards.org/cgi-bin/carddisp.pl?gene=NFE2L2</a>                 |
| ADRB2          | Adrenoceptor $\beta$ 2                                         | Protein coding | 50 | GC05P148825 | 10.58823586 | <a href="https://www.genecards.org/cgi-bin/carddisp.pl?gene=ADRB2">https://www.genecards.org/cgi-bin/carddisp.pl?gene=ADRB2</a>                   |
| ADORA3         | Adenosine A3 Receptor                                          | Protein coding | 46 | GC01M111499 | 10.51327324 | <a href="https://www.genecards.org/cgi-bin/carddisp.pl?gene=ADORA3">https://www.genecards.org/cgi-bin/carddisp.pl?gene=ADORA3</a>                 |
| CD40LG         | CD40 Ligand                                                    | Protein coding | 47 | GC0XP136649 | 10.50374222 | <a href="https://www.genecards.org/cgi-bin/carddisp.pl?gene=CD40LG">https://www.genecards.org/cgi-bin/carddisp.pl?gene=CD40LG</a>                 |
| SOD1           | Superoxide Dismutase 1                                         | Protein coding | 51 | GC21P031659 | 10.49269676 | <a href="https://www.genecards.org/cgi-bin/carddisp.pl?gene=SOD1">https://www.genecards.org/cgi-bin/carddisp.pl?gene=SOD1</a>                     |
| MYBPC3         | Myosin Binding Protein C3                                      | Protein coding | 46 | GC11M071234 | 10.43990421 | <a href="https://www.genecards.org/cgi-bin/carddisp.pl?gene=MYBPC3">https://www.genecards.org/cgi-bin/carddisp.pl?gene=MYBPC3</a>                 |
| MAT2A          | Methionine Adenosyltransferase 2A                              | Protein coding | 47 | GC02P085538 | 10.42476177 | <a href="https://www.genecards.org/cgi-bin/carddisp.pl?gene=MAT2A">https://www.genecards.org/cgi-bin/carddisp.pl?gene=MAT2A</a>                   |
| AGTR2          | Angiotensin II Receptor Type 2                                 | Protein coding | 43 | GC0XP116170 | 10.41490173 | <a href="https://www.genecards.org/cgi-bin/carddisp.pl?gene=AGTR2">https://www.genecards.org/cgi-bin/carddisp.pl?gene=AGTR2</a>                   |
| ADORA2A        | Adenosine A2a Receptor                                         | Protein coding | 46 | GC22P024417 | 10.38405037 | <a href="https://www.genecards.org/cgi-bin/carddisp.pl?gene=ADORA2A">https://www.genecards.org/cgi-bin/carddisp.pl?gene=ADORA2A</a>               |
| IL1RN          | Interleukin 1 Receptor Antagonist                              | Protein coding | 48 | GC02P117302 | 10.35118198 | <a href="https://www.genecards.org/cgi-bin/carddisp.pl?gene=IL1RN">https://www.genecards.org/cgi-bin/carddisp.pl?gene=IL1RN</a>                   |
| FOXE3          | Forkhead Box E3                                                | Protein coding | 37 | GC01P047416 | 10.32187653 | <a href="https://www.genecards.org/cgi-bin/carddisp.pl?gene=FOXE3">https://www.genecards.org/cgi-bin/carddisp.pl?gene=FOXE3</a>                   |
| IL4            | Interleukin 4                                                  | Protein coding | 45 | GC05P132673 | 10.21636868 | <a href="https://www.genecards.org/cgi-bin/carddisp.pl?gene=IL4">https://www.genecards.org/cgi-bin/carddisp.pl?gene=IL4</a>                       |
| MMP2           | Matrix Metallopeptidase 2                                      | Protein coding | 52 | GC16P055390 | 10.21218872 | <a href="https://www.genecards.org/cgi-bin/carddisp.pl?gene=MMP2">https://www.genecards.org/cgi-bin/carddisp.pl?gene=MMP2</a>                     |
| RPL36A-HNRNPH2 | RPL36A-HNRNPH2 Readthrough                                     | Protein coding | 18 | GC0XP101390 | 10.09581947 | <a href="https://www.genecards.org/cgi-bin/carddisp.pl?gene=RPL36A-HNRNPH2">https://www.genecards.org/cgi-bin/carddisp.pl?gene=RPL36A-HNRNPH2</a> |
| MAPK3          | Mitogen-Activated Protein Kinase 3                             | Protein coding | 48 | GC16M031685 | 10.08491135 | <a href="https://www.genecards.org/cgi-bin/carddisp.pl?gene=MAPK3">https://www.genecards.org/cgi-bin/carddisp.pl?gene=MAPK3</a>                   |
| MMP3           | Matrix Metallopeptidase 3                                      | Protein coding | 51 | GC11M102835 | 10.06524086 | <a href="https://www.genecards.org/cgi-bin/carddisp.pl?gene=MMP3">https://www.genecards.org/cgi-bin/carddisp.pl?gene=MMP3</a>                     |
| DCX            | Doublecortin                                                   | Protein coding | 45 | GC0XM111293 | 10.05057621 | <a href="https://www.genecards.org/cgi-bin/carddisp.pl?gene=DCX">https://www.genecards.org/cgi-bin/carddisp.pl?gene=DCX</a>                       |
| KNG1           | Kininogen 1                                                    | Protein coding | 45 | GC03P186717 | 10.03766918 | <a href="https://www.genecards.org/cgi-bin/carddisp.pl?gene=KNG1">https://www.genecards.org/cgi-bin/carddisp.pl?gene=KNG1</a>                     |
| TNFRSF12A      | TNF Receptor Superfamily Member 12A                            | Protein coding | 43 | GC16P003018 | 9.99246788  | <a href="https://www.genecards.org/cgi-bin/carddisp.pl?gene=TNFRSF12A">https://www.genecards.org/cgi-bin/carddisp.pl?gene=TNFRSF12A</a>           |
| PTEN           | Phosphatase And Tensin Homolog                                 | Protein coding | 52 | GC10P087863 | 9.988119125 | <a href="https://www.genecards.org/cgi-bin/carddisp.pl?gene=PTEN">https://www.genecards.org/cgi-bin/carddisp.pl?gene=PTEN</a>                     |
| MIAT           | Myocardial Infarction Associated Transcript                    | RNA gene       | 24 | GC22P026646 | 9.977873802 | <a href="https://www.genecards.org/cgi-bin/carddisp.pl?gene=MIAT">https://www.genecards.org/cgi-bin/carddisp.pl?gene=MIAT</a>                     |
| FGF2           | Fibroblast Growth Factor 2                                     | Protein coding | 47 | GC04P122826 | 9.968539238 | <a href="https://www.genecards.org/cgi-bin/carddisp.pl?gene=FGF2">https://www.genecards.org/cgi-bin/carddisp.pl?gene=FGF2</a>                     |
| ITGA2B         | Integrin Subunit $\alpha$ 2b                                   | Protein coding | 51 | GC17M044477 | 9.87289238  | <a href="https://www.genecards.org/cgi-bin/carddisp.pl?gene=ITGA2B">https://www.genecards.org/cgi-bin/carddisp.pl?gene=ITGA2B</a>                 |
| SCN5A          | Sodium Voltage-Gated Channel $\alpha$ Subunit 5                | Protein coding | 50 | GC03M038549 | 9.85046196  | <a href="https://www.genecards.org/cgi-bin/carddisp.pl?gene=SCN5A">https://www.genecards.org/cgi-bin/carddisp.pl?gene=SCN5A</a>                   |
| CD14           | CD14 Molecule                                                  | Protein coding | 44 | GC05M140631 | 9.744434357 | <a href="https://www.genecards.org/cgi-bin/carddisp.pl?gene=CD14">https://www.genecards.org/cgi-bin/carddisp.pl?gene=CD14</a>                     |
| SERPIND1       | Serpin Family D Member 1                                       | Protein coding | 45 | GC22P021208 | 9.727474213 | <a href="https://www.genecards.org/cgi-bin/carddisp.pl?gene=SERPIND1">https://www.genecards.org/cgi-bin/carddisp.pl?gene=SERPIND1</a>             |
| BACE1          | $\beta$ -Secretase 1                                           | Protein coding | 47 | GC11M117285 | 9.688318253 | <a href="https://www.genecards.org/cgi-bin/carddisp.pl?gene=BACE1">https://www.genecards.org/cgi-bin/carddisp.pl?gene=BACE1</a>                   |
| HBB            | Hemoglobin Subunit $\beta$                                     | Protein coding | 45 | GC11M005462 | 9.588320732 | <a href="https://www.genecards.org/cgi-bin/carddisp.pl?gene=HBB">https://www.genecards.org/cgi-bin/carddisp.pl?gene=HBB</a>                       |
| HEY2           | Hes Related Family BHLH Transcription Factor With YRPW Motif 2 | Protein coding | 40 | GC06P125730 | 9.562351227 | <a href="https://www.genecards.org/cgi-bin/carddisp.pl?gene=HEY2">https://www.genecards.org/cgi-bin/carddisp.pl?gene=HEY2</a>                     |
| MYH7           | Myosin Heavy Chain 7                                           | Protein coding | 47 | GC14M023412 | 9.497509003 | <a href="https://www.genecards.org/cgi-bin/carddisp.pl?gene=MYH7">https://www.genecards.org/cgi-bin/carddisp.pl?gene=MYH7</a>                     |
| TGFB1          | Transforming Growth Factor $\beta$ 1                           | Protein coding | 51 | GC19M041301 | 9.412311554 | <a href="https://www.genecards.org/cgi-bin/carddisp.pl?gene=TGFB1">https://www.genecards.org/cgi-bin/carddisp.pl?gene=TGFB1</a>                   |
| SON            | SON DNA And RNA Binding Protein                                | Protein coding | 40 | GC21P033542 | 9.388869286 | <a href="https://www.genecards.org/cgi-bin/carddisp.pl?gene=SON">https://www.genecards.org/cgi-bin/carddisp.pl?gene=SON</a>                       |

|              |                                                                |                   |    |             |             |                                                                                                                                               |
|--------------|----------------------------------------------------------------|-------------------|----|-------------|-------------|-----------------------------------------------------------------------------------------------------------------------------------------------|
| CASP9        | Caspase 9                                                      | Protein coding    | 48 | GC01M015491 | 9.373119354 | <a href="https://www.genecards.org/cgi-bin/carddisp.pl?gene=CASP9">https://www.genecards.org/cgi-bin/carddisp.pl?gene=CASP9</a>               |
| BRCC3        | BRCA1/BRCA2-Containing Complex Subunit 3                       | Protein coding    | 43 | GC0XP155071 | 9.357881546 | <a href="https://www.genecards.org/cgi-bin/carddisp.pl?gene=BRCC3">https://www.genecards.org/cgi-bin/carddisp.pl?gene=BRCC3</a>               |
| HHT4         | Telangiectasia, Hereditary Hemorrhagic, Type 4                 | Genetic locus     | 1  | GC07U901803 | 9.337359428 | <a href="https://www.genecards.org/cgi-bin/carddisp.pl?gene=HHT4">https://www.genecards.org/cgi-bin/carddisp.pl?gene=HHT4</a>                 |
| GATA6        | GATA Binding Protein 6                                         | Protein coding    | 47 | GC18P022169 | 9.325033188 | <a href="https://www.genecards.org/cgi-bin/carddisp.pl?gene=GATA6">https://www.genecards.org/cgi-bin/carddisp.pl?gene=GATA6</a>               |
| CBS          | Cystathionine $\beta$ -Synthase                                | Protein coding    | 49 | GC21M043053 | 9.285207748 | <a href="https://www.genecards.org/cgi-bin/carddisp.pl?gene=CBS">https://www.genecards.org/cgi-bin/carddisp.pl?gene=CBS</a>                   |
| AIF1         | Allograft Inflammatory Factor 1                                | Protein coding    | 38 | GC06P058306 | 9.256052017 | <a href="https://www.genecards.org/cgi-bin/carddisp.pl?gene=AIF1">https://www.genecards.org/cgi-bin/carddisp.pl?gene=AIF1</a>                 |
| RETN         | Resistin                                                       | Protein coding    | 43 | GC19P007669 | 9.228279114 | <a href="https://www.genecards.org/cgi-bin/carddisp.pl?gene=RETN">https://www.genecards.org/cgi-bin/carddisp.pl?gene=RETN</a>                 |
| DARS2        | Aspartyl-TRNA Synthetase 2, Mitochondrial                      | Protein coding    | 42 | GC01P173824 | 9.197587967 | <a href="https://www.genecards.org/cgi-bin/carddisp.pl?gene=DARS2">https://www.genecards.org/cgi-bin/carddisp.pl?gene=DARS2</a>               |
| SMAD2        | SMAD Family Member 2                                           | Protein coding    | 47 | GC18M047809 | 9.187968254 | <a href="https://www.genecards.org/cgi-bin/carddisp.pl?gene=SMAD2">https://www.genecards.org/cgi-bin/carddisp.pl?gene=SMAD2</a>               |
| NDE1         | NudE Neurodevelopment Protein 1                                | Protein coding    | 43 | GC16P015671 | 9.167289734 | <a href="https://www.genecards.org/cgi-bin/carddisp.pl?gene=NDE1">https://www.genecards.org/cgi-bin/carddisp.pl?gene=NDE1</a>                 |
| PMM2         | Phosphomannomutase 2                                           | Protein coding    | 46 | GC16P008788 | 9.161190033 | <a href="https://www.genecards.org/cgi-bin/carddisp.pl?gene=PMM2">https://www.genecards.org/cgi-bin/carddisp.pl?gene=PMM2</a>                 |
| F8           | Coagulation Factor VIII                                        | Protein coding    | 46 | GC0XM154835 | 9.111580849 | <a href="https://www.genecards.org/cgi-bin/carddisp.pl?gene=F8">https://www.genecards.org/cgi-bin/carddisp.pl?gene=F8</a>                     |
| NTF3         | Neurotrophin 3                                                 | Protein coding    | 42 | GC12P005432 | 9.053094864 | <a href="https://www.genecards.org/cgi-bin/carddisp.pl?gene=NTF3">https://www.genecards.org/cgi-bin/carddisp.pl?gene=NTF3</a>                 |
| MIR21        | MicroRNA 21                                                    | RNA gene          | 24 | GC17P059841 | 9.015267372 | <a href="https://www.genecards.org/cgi-bin/carddisp.pl?gene=MIR21">https://www.genecards.org/cgi-bin/carddisp.pl?gene=MIR21</a>               |
| CYP3A5       | Cytochrome P450 Family 3 Subfamily A Member 5                  | Protein coding    | 48 | GC07M099648 | 8.99514389  | <a href="https://www.genecards.org/cgi-bin/carddisp.pl?gene=CYP3A5">https://www.genecards.org/cgi-bin/carddisp.pl?gene=CYP3A5</a>             |
| HMOX1        | Heme Oxygenase 1                                               | Protein coding    | 52 | GC22P035380 | 8.994007111 | <a href="https://www.genecards.org/cgi-bin/carddisp.pl?gene=HMOX1">https://www.genecards.org/cgi-bin/carddisp.pl?gene=HMOX1</a>               |
| EPO          | Erythropoietin                                                 | Protein coding    | 40 | GC07P100720 | 8.934011459 | <a href="https://www.genecards.org/cgi-bin/carddisp.pl?gene=EPO">https://www.genecards.org/cgi-bin/carddisp.pl?gene=EPO</a>                   |
| MIR155       | MicroRNA 155                                                   | RNA gene          | 19 | GC21P025573 | 8.933791161 | <a href="https://www.genecards.org/cgi-bin/carddisp.pl?gene=MIR155">https://www.genecards.org/cgi-bin/carddisp.pl?gene=MIR155</a>             |
| IL18         | Interleukin 18                                                 | Protein coding    | 43 | GC11M112143 | 8.931594849 | <a href="https://www.genecards.org/cgi-bin/carddisp.pl?gene=IL18">https://www.genecards.org/cgi-bin/carddisp.pl?gene=IL18</a>                 |
| POLG         | DNA Polymerase $\gamma$ , Catalytic Subunit                    | Protein coding    | 45 | GC15M089393 | 8.922725677 | <a href="https://www.genecards.org/cgi-bin/carddisp.pl?gene=POLG">https://www.genecards.org/cgi-bin/carddisp.pl?gene=POLG</a>                 |
| S100B        | S100 Calcium Binding Protein B                                 | Protein coding    | 45 | GC21M048631 | 8.883867264 | <a href="https://www.genecards.org/cgi-bin/carddisp.pl?gene=S100B">https://www.genecards.org/cgi-bin/carddisp.pl?gene=S100B</a>               |
| MPO          | Myeloperoxidase                                                | Protein coding    | 50 | GC17M058269 | 8.79464817  | <a href="https://www.genecards.org/cgi-bin/carddisp.pl?gene=MPO">https://www.genecards.org/cgi-bin/carddisp.pl?gene=MPO</a>                   |
| PRNP         | Prion Protein                                                  | Protein coding    | 46 | GC20P004686 | 8.751431465 | <a href="https://www.genecards.org/cgi-bin/carddisp.pl?gene=PRNP">https://www.genecards.org/cgi-bin/carddisp.pl?gene=PRNP</a>                 |
| LTA          | Lymphotoxin $\alpha$                                           | Protein coding    | 41 | GC06P058305 | 8.747433662 | <a href="https://www.genecards.org/cgi-bin/carddisp.pl?gene=LTA">https://www.genecards.org/cgi-bin/carddisp.pl?gene=LTA</a>                   |
| ACTB         | Actin $\beta$                                                  | Protein coding    | 49 | GC07M005527 | 8.738634109 | <a href="https://www.genecards.org/cgi-bin/carddisp.pl?gene=ACTB">https://www.genecards.org/cgi-bin/carddisp.pl?gene=ACTB</a>                 |
| IL1A         | Interleukin 1 $\alpha$                                         | Protein coding    | 43 | GC02M112773 | 8.716461182 | <a href="https://www.genecards.org/cgi-bin/carddisp.pl?gene=IL1A">https://www.genecards.org/cgi-bin/carddisp.pl?gene=IL1A</a>                 |
| CETP         | Cholesteryl Ester Transfer Protein                             | Protein coding    | 47 | GC16P056961 | 8.591667175 | <a href="https://www.genecards.org/cgi-bin/carddisp.pl?gene=CETP">https://www.genecards.org/cgi-bin/carddisp.pl?gene=CETP</a>                 |
| ZMPSTE24     | Zinc Metallopeptidase STE24                                    | Protein coding    | 43 | GC01P040258 | 8.555393219 | <a href="https://www.genecards.org/cgi-bin/carddisp.pl?gene=ZMPSTE24">https://www.genecards.org/cgi-bin/carddisp.pl?gene=ZMPSTE24</a>         |
| PDE5A        | Phosphodiesterase 5A                                           | Protein coding    | 45 | GC04M119494 | 8.520957947 | <a href="https://www.genecards.org/cgi-bin/carddisp.pl?gene=PDE5A">https://www.genecards.org/cgi-bin/carddisp.pl?gene=PDE5A</a>               |
| HSPA1A       | Heat Shock Protein Family A (Hsp70) Member 1A                  | Protein coding    | 44 | GC06P058328 | 8.502643585 | <a href="https://www.genecards.org/cgi-bin/carddisp.pl?gene=HSPA1A">https://www.genecards.org/cgi-bin/carddisp.pl?gene=HSPA1A</a>             |
| MYH6         | Myosin Heavy Chain 6                                           | Protein coding    | 46 | GC14M023380 | 8.498790741 | <a href="https://www.genecards.org/cgi-bin/carddisp.pl?gene=MYH6">https://www.genecards.org/cgi-bin/carddisp.pl?gene=MYH6</a>                 |
| PTGS1        | Prostaglandin-Endoperoxide Synthase 1                          | Protein coding    | 46 | GC09P122370 | 8.490834236 | <a href="https://www.genecards.org/cgi-bin/carddisp.pl?gene=PTGS1">https://www.genecards.org/cgi-bin/carddisp.pl?gene=PTGS1</a>               |
| RTN4         | Reticulon 4                                                    | Protein coding    | 44 | GC02M054934 | 8.452795982 | <a href="https://www.genecards.org/cgi-bin/carddisp.pl?gene=RTN4">https://www.genecards.org/cgi-bin/carddisp.pl?gene=RTN4</a>                 |
| GFAP         | Glial Fibrillary Acidic Protein                                | Protein coding    | 47 | GC17M044905 | 8.359365463 | <a href="https://www.genecards.org/cgi-bin/carddisp.pl?gene=GFAP">https://www.genecards.org/cgi-bin/carddisp.pl?gene=GFAP</a>                 |
| APOC3        | Apolipoprotein C3                                              | Protein coding    | 44 | GC11P116829 | 8.358756065 | <a href="https://www.genecards.org/cgi-bin/carddisp.pl?gene=APOC3">https://www.genecards.org/cgi-bin/carddisp.pl?gene=APOC3</a>               |
| ECE1         | Endothelin Converting Enzyme 1                                 | Protein coding    | 48 | GC01M021217 | 8.337213516 | <a href="https://www.genecards.org/cgi-bin/carddisp.pl?gene=ECE1">https://www.genecards.org/cgi-bin/carddisp.pl?gene=ECE1</a>                 |
| G6PD         | Glucose-6-Phosphate Dehydrogenase                              | Protein coding    | 50 | GC0XM154531 | 8.310552597 | <a href="https://www.genecards.org/cgi-bin/carddisp.pl?gene=G6PD">https://www.genecards.org/cgi-bin/carddisp.pl?gene=G6PD</a>                 |
| LEP          | Leptin                                                         | Protein coding    | 47 | GC07P128241 | 8.277990341 | <a href="https://www.genecards.org/cgi-bin/carddisp.pl?gene=LEP">https://www.genecards.org/cgi-bin/carddisp.pl?gene=LEP</a>                   |
| LIPC         | Lipase C, Hepatic Type                                         | Protein coding    | 45 | GC15P058410 | 8.269201279 | <a href="https://www.genecards.org/cgi-bin/carddisp.pl?gene=LIPC">https://www.genecards.org/cgi-bin/carddisp.pl?gene=LIPC</a>                 |
| BGN          | Biglycan                                                       | Protein coding    | 42 | GC0XP153494 | 8.249116898 | <a href="https://www.genecards.org/cgi-bin/carddisp.pl?gene=BGN">https://www.genecards.org/cgi-bin/carddisp.pl?gene=BGN</a>                   |
| RBFOX3       | RNA Binding Fox-1 Homolog 3                                    | Protein coding    | 36 | GC17M079089 | 8.248031616 | <a href="https://www.genecards.org/cgi-bin/carddisp.pl?gene=RBFOX3">https://www.genecards.org/cgi-bin/carddisp.pl?gene=RBFOX3</a>             |
| NOS2         | Nitric Oxide Synthase 2                                        | Protein coding    | 50 | GC17M027756 | 8.245108604 | <a href="https://www.genecards.org/cgi-bin/carddisp.pl?gene=NOS2">https://www.genecards.org/cgi-bin/carddisp.pl?gene=NOS2</a>                 |
| PKD1         | Polycystin 1, Transient Receptor Potential Channel Interacting | Protein coding    | 45 | GC16M003824 | 8.217687607 | <a href="https://www.genecards.org/cgi-bin/carddisp.pl?gene=PKD1">https://www.genecards.org/cgi-bin/carddisp.pl?gene=PKD1</a>                 |
| NOTCH1       | Notch Receptor 1                                               | Protein coding    | 51 | GC09M136832 | 8.187603951 | <a href="https://www.genecards.org/cgi-bin/carddisp.pl?gene=NOTCH1">https://www.genecards.org/cgi-bin/carddisp.pl?gene=NOTCH1</a>             |
| NOS1         | Nitric Oxide Synthase 1                                        | Protein coding    | 50 | GC12M117208 | 8.16618824  | <a href="https://www.genecards.org/cgi-bin/carddisp.pl?gene=NOS1">https://www.genecards.org/cgi-bin/carddisp.pl?gene=NOS1</a>                 |
| EPHX2        | Epoxide Hydrolase 2                                            | Protein coding    | 48 | GC08P027490 | 7.95101881  | <a href="https://www.genecards.org/cgi-bin/carddisp.pl?gene=EPHX2">https://www.genecards.org/cgi-bin/carddisp.pl?gene=EPHX2</a>               |
| KRAS         | KRAS Proto-Oncogene, GTPase                                    | Protein coding    | 51 | GC12M025204 | 7.93198967  | <a href="https://www.genecards.org/cgi-bin/carddisp.pl?gene=KRAS">https://www.genecards.org/cgi-bin/carddisp.pl?gene=KRAS</a>                 |
| PROC         | Protein C, Inactivator Of Coagulation Factors Va And VIIIa     | Protein coding    | 49 | GC02P127418 | 7.83908844  | <a href="https://www.genecards.org/cgi-bin/carddisp.pl?gene=PROC">https://www.genecards.org/cgi-bin/carddisp.pl?gene=PROC</a>                 |
| NF1          | Neurofibromin 1                                                | Protein coding    | 49 | GC17P031094 | 7.82336235  | <a href="https://www.genecards.org/cgi-bin/carddisp.pl?gene=NF1">https://www.genecards.org/cgi-bin/carddisp.pl?gene=NF1</a>                   |
| TNFRSF11B    | TNF Receptor Superfamily Member 11b                            | Protein coding    | 47 | GC08M118923 | 7.820196152 | <a href="https://www.genecards.org/cgi-bin/carddisp.pl?gene=TNFRSF11B">https://www.genecards.org/cgi-bin/carddisp.pl?gene=TNFRSF11B</a>       |
| SLC6A4       | Solute Carrier Family 6 Member 4                               | Protein coding    | 48 | GC17M030194 | 7.786734104 | <a href="https://www.genecards.org/cgi-bin/carddisp.pl?gene=SLC6A4">https://www.genecards.org/cgi-bin/carddisp.pl?gene=SLC6A4</a>             |
| HLA-DRB1     | Major Histocompatibility Complex, Class II, DR $\beta$ 1       | Protein coding    | 47 | GC06M032578 | 7.77658844  | <a href="https://www.genecards.org/cgi-bin/carddisp.pl?gene=HLA-DRB1">https://www.genecards.org/cgi-bin/carddisp.pl?gene=HLA-DRB1</a>         |
| HP           | Haptoglobin                                                    | Protein coding    | 44 | GC16P072089 | 7.762225151 | <a href="https://www.genecards.org/cgi-bin/carddisp.pl?gene=HP">https://www.genecards.org/cgi-bin/carddisp.pl?gene=HP</a>                     |
| CALCA        | Calcitonin Related Polypeptide $\alpha$                        | Protein coding    | 43 | GC11M014945 | 7.7306633   | <a href="https://www.genecards.org/cgi-bin/carddisp.pl?gene=CALCA">https://www.genecards.org/cgi-bin/carddisp.pl?gene=CALCA</a>               |
| ALDH2        | Aldehyde Dehydrogenase 2 Family Member                         | Protein coding    | 50 | GC12P111766 | 7.702367783 | <a href="https://www.genecards.org/cgi-bin/carddisp.pl?gene=ALDH2">https://www.genecards.org/cgi-bin/carddisp.pl?gene=ALDH2</a>               |
| NPY          | Neuropeptide Y                                                 | Protein coding    | 45 | GC07P024290 | 7.679821968 | <a href="https://www.genecards.org/cgi-bin/carddisp.pl?gene=NPY">https://www.genecards.org/cgi-bin/carddisp.pl?gene=NPY</a>                   |
| CDKN2A       | Cyclin Dependent Kinase Inhibitor 2A                           | Protein coding    | 51 | GC09M021967 | 7.676673889 | <a href="https://www.genecards.org/cgi-bin/carddisp.pl?gene=CDKN2A">https://www.genecards.org/cgi-bin/carddisp.pl?gene=CDKN2A</a>             |
| F11          | Coagulation Factor XI                                          | Protein coding    | 45 | GC04P186265 | 7.674022675 | <a href="https://www.genecards.org/cgi-bin/carddisp.pl?gene=F11">https://www.genecards.org/cgi-bin/carddisp.pl?gene=F11</a>                   |
| CYP11B2      | Cytochrome P450 Family 11 Subfamily B Member 2                 | Protein coding    | 47 | GC08M142910 | 7.655077934 | <a href="https://www.genecards.org/cgi-bin/carddisp.pl?gene=CYP11B2">https://www.genecards.org/cgi-bin/carddisp.pl?gene=CYP11B2</a>           |
| PITX2        | Paired Like Homeodomain 2                                      | Protein coding    | 47 | GC04M110617 | 7.644974709 | <a href="https://www.genecards.org/cgi-bin/carddisp.pl?gene=PITX2">https://www.genecards.org/cgi-bin/carddisp.pl?gene=PITX2</a>               |
| FLVCR2       | FLVCR Heme Transporter 2                                       | Protein coding    | 41 | GC14P075578 | 7.549800396 | <a href="https://www.genecards.org/cgi-bin/carddisp.pl?gene=FLVCR2">https://www.genecards.org/cgi-bin/carddisp.pl?gene=FLVCR2</a>             |
| NCF1         | Neutrophil Cytosolic Factor 1                                  | Protein coding    | 48 | GC07P074773 | 7.525801659 | <a href="https://www.genecards.org/cgi-bin/carddisp.pl?gene=NCF1">https://www.genecards.org/cgi-bin/carddisp.pl?gene=NCF1</a>                 |
| AGER         | Advanced Glycosylation End-Product Specific Receptor           | Protein coding    | 44 | GC06M032180 | 7.50450325  | <a href="https://www.genecards.org/cgi-bin/carddisp.pl?gene=AGER">https://www.genecards.org/cgi-bin/carddisp.pl?gene=AGER</a>                 |
| LOC113939944 | Sharpr-MPRA Regulatory Region 9539                             | Biological region | 2  | GC15P048520 | 7.450813293 | <a href="https://www.genecards.org/cgi-bin/carddisp.pl?gene=LOC113939944">https://www.genecards.org/cgi-bin/carddisp.pl?gene=LOC113939944</a> |
| CP           | Ceruloplasmin                                                  | Protein coding    | 48 | GC03M149162 | 7.448239326 | <a href="https://www.genecards.org/cgi-bin/carddisp.pl?gene=CP">https://www.genecards.org/cgi-bin/carddisp.pl?gene=CP</a>                     |
| AMPD1        | Adenosine Monophosphate Deaminase 1                            | Protein coding    | 46 | GC01M114673 | 7.42686367  | <a href="https://www.genecards.org/cgi-bin/carddisp.pl?gene=AMPD1">https://www.genecards.org/cgi-bin/carddisp.pl?gene=AMPD1</a>               |
| FGG          | Fibrinogen $\gamma$ Chain                                      | Protein coding    | 48 | GC04M154604 | 7.383600235 | <a href="https://www.genecards.org/cgi-bin/carddisp.pl?gene=FGG">https://www.genecards.org/cgi-bin/carddisp.pl?gene=FGG</a>                   |
| HDAC9        | Histone Deacetylase 9                                          | Protein coding    | 47 | GC07P018086 | 7.315122604 | <a href="https://www.genecards.org/cgi-bin/carddisp.pl?gene=HDAC9">https://www.genecards.org/cgi-bin/carddisp.pl?gene=HDAC9</a>               |
| MIR146A      | MicroRNA 146a                                                  | RNA gene          | 23 | GC05P160485 | 7.304676533 | <a href="https://www.genecards.org/cgi-bin/carddisp.pl?gene=MIR146A">https://www.genecards.org/cgi-bin/carddisp.pl?gene=MIR146A</a>           |
| GDF15        | Growth Differentiation Factor 15                               | Protein coding    | 41 | GC19P027797 | 7.303331852 | <a href="https://www.genecards.org/cgi-bin/carddisp.pl?gene=GDF15">https://www.genecards.org/cgi-bin/carddisp.pl?gene=GDF15</a>               |
| GNAQ         | G Protein Subunit $\alpha$ Q                                   | Protein coding    | 49 | GC09M077716 | 7.275221348 | <a href="https://www.genecards.org/cgi-bin/carddisp.pl?gene=GNAQ">https://www.genecards.org/cgi-bin/carddisp.pl?gene=GNAQ</a>                 |
| KRIT1        | KRIT1 Ankyrin Repeat Containing                                | Protein coding    | 42 | GC07M092198 | 7.255153656 | <a href="https://www.genecards.org/cgi-bin/carddisp.pl?gene=KRIT1">https://www.genecards.org/cgi-bin/carddisp.pl?gene=KRIT1</a>               |
| DES          | Desmin                                                         | Protein coding    | 47 | GC02P219418 | 7.245953083 | <a href="https://www.genecards.org/cgi-bin/carddisp.pl?gene=DES">https://www.genecards.org/cgi-bin/carddisp.pl?gene=DES</a>                   |
| CCR2         | C-C Motif Chemokine Receptor 2                                 | Protein coding    | 44 | GC03P046356 | 7.235372543 | <a href="https://www.genecards.org/cgi-bin/carddisp.pl?gene=CCR2">https://www.genecards.org/cgi-bin/carddisp.pl?gene=CCR2</a>                 |
| PDE3A        | Phosphodiesterase 3A                                           | Protein coding    | 49 | GC12P020294 | 7.218407631 | <a href="https://www.genecards.org/cgi-bin/carddisp.pl?gene=PDE3A">https://www.genecards.org/cgi-bin/carddisp.pl?gene=PDE3A</a>               |
| BRCA2        | BRCA2 DNA Repair Associated                                    | Protein coding    | 49 | GC13P032315 | 7.161483765 | <a href="https://www.genecards.org/cgi-bin/carddisp.pl?gene=BRCA2">https://www.genecards.org/cgi-bin/carddisp.pl?gene=BRCA2</a>               |

|          |                                                                                 |                |    |             |             |                                                                                                                                       |
|----------|---------------------------------------------------------------------------------|----------------|----|-------------|-------------|---------------------------------------------------------------------------------------------------------------------------------------|
| NGF      | Nerve Growth Factor                                                             | Protein coding | 50 | GC01M115285 | 7.084950447 | <a href="https://www.genecards.org/cgi-bin/carddisp.pl?gene=NGF">https://www.genecards.org/cgi-bin/carddisp.pl?gene=NGF</a>           |
| KCNJ5    | Potassium Inwardly Rectifying Channel Subfamily J Member 5                      | Protein coding | 47 | GC11P128891 | 7.061995983 | <a href="https://www.genecards.org/cgi-bin/carddisp.pl?gene=KCNJ5">https://www.genecards.org/cgi-bin/carddisp.pl?gene=KCNJ5</a>       |
| ATM      | ATM Serine/Threonine Kinase                                                     | Protein coding | 52 | GC11P108222 | 7.045526028 | <a href="https://www.genecards.org/cgi-bin/carddisp.pl?gene=ATM">https://www.genecards.org/cgi-bin/carddisp.pl?gene=ATM</a>           |
| WFS1     | Wolfram ER Transmembrane Glycoprotein                                           | Protein coding | 45 | GC04P006260 | 7.033541679 | <a href="https://www.genecards.org/cgi-bin/carddisp.pl?gene=WFS1">https://www.genecards.org/cgi-bin/carddisp.pl?gene=WFS1</a>         |
| CSF3     | Colony Stimulating Factor 3                                                     | Protein coding | 39 | GC17P040015 | 7.033453465 | <a href="https://www.genecards.org/cgi-bin/carddisp.pl?gene=CSF3">https://www.genecards.org/cgi-bin/carddisp.pl?gene=CSF3</a>         |
| TBX20    | T-Box Transcription Factor 20                                                   | Protein coding | 42 | GC07M035237 | 6.994659424 | <a href="https://www.genecards.org/cgi-bin/carddisp.pl?gene=TBX20">https://www.genecards.org/cgi-bin/carddisp.pl?gene=TBX20</a>       |
| HLA-DQB1 | Major Histocompatibility Complex, Class II, DQ $\beta$ 1                        | Protein coding | 43 | GC06M049175 | 6.966951847 | <a href="https://www.genecards.org/cgi-bin/carddisp.pl?gene=HLA-DQB1">https://www.genecards.org/cgi-bin/carddisp.pl?gene=HLA-DQB1</a> |
| CYP2C9   | Cytochrome P450 Family 2 Subfamily C Member 9                                   | Protein coding | 49 | GC10P094938 | 6.899747849 | <a href="https://www.genecards.org/cgi-bin/carddisp.pl?gene=CYP2C9">https://www.genecards.org/cgi-bin/carddisp.pl?gene=CYP2C9</a>     |
| MMACHC   | Metabolism Of Cobalamin Associated C                                            | Protein coding | 43 | GC01P045500 | 6.891348362 | <a href="https://www.genecards.org/cgi-bin/carddisp.pl?gene=MMACHC">https://www.genecards.org/cgi-bin/carddisp.pl?gene=MMACHC</a>     |
| ZFX3     | Zinc Finger Homeobox 3                                                          | Protein coding | 41 | GC16M072782 | 6.863381386 | <a href="https://www.genecards.org/cgi-bin/carddisp.pl?gene=ZFX3">https://www.genecards.org/cgi-bin/carddisp.pl?gene=ZFX3</a>         |
| ADRB1    | Adrenoceptor $\beta$ 1                                                          | Protein coding | 48 | GC10P114044 | 6.835595608 | <a href="https://www.genecards.org/cgi-bin/carddisp.pl?gene=ADRB1">https://www.genecards.org/cgi-bin/carddisp.pl?gene=ADRB1</a>       |
| APOA5    | Apolipoprotein A5                                                               | Protein coding | 44 | GC11M116789 | 6.802562237 | <a href="https://www.genecards.org/cgi-bin/carddisp.pl?gene=APOA5">https://www.genecards.org/cgi-bin/carddisp.pl?gene=APOA5</a>       |
| GCKR     | Glucokinase Regulator                                                           | Protein coding | 41 | GC02P027496 | 6.777915001 | <a href="https://www.genecards.org/cgi-bin/carddisp.pl?gene=GCKR">https://www.genecards.org/cgi-bin/carddisp.pl?gene=GCKR</a>         |
| CYBA     | Cytochrome B-245 $\alpha$ Chain                                                 | Protein coding | 47 | GC16M088643 | 6.770494461 | <a href="https://www.genecards.org/cgi-bin/carddisp.pl?gene=CYBA">https://www.genecards.org/cgi-bin/carddisp.pl?gene=CYBA</a>         |
| C3       | Complement C3                                                                   | Protein coding | 47 | GC19M006677 | 6.749676704 | <a href="https://www.genecards.org/cgi-bin/carddisp.pl?gene=C3">https://www.genecards.org/cgi-bin/carddisp.pl?gene=C3</a>             |
| CCR5     | C-C Motif Chemokine Receptor 5                                                  | Protein coding | 46 | GC03P046383 | 6.747981071 | <a href="https://www.genecards.org/cgi-bin/carddisp.pl?gene=CCR5">https://www.genecards.org/cgi-bin/carddisp.pl?gene=CCR5</a>         |
| KDR      | Kinase Insert Domain Receptor                                                   | Protein coding | 52 | GC04M055078 | 6.73373127  | <a href="https://www.genecards.org/cgi-bin/carddisp.pl?gene=KDR">https://www.genecards.org/cgi-bin/carddisp.pl?gene=KDR</a>           |
| CAPN3    | Calpain 3                                                                       | Protein coding | 48 | GC15P042359 | 6.732082367 | <a href="https://www.genecards.org/cgi-bin/carddisp.pl?gene=CAPN3">https://www.genecards.org/cgi-bin/carddisp.pl?gene=CAPN3</a>       |
| DPM3     | Dolichyl-Phosphate Mannosyltransferase Subunit 3, Regulatory                    | Protein coding | 40 | GC01M155112 | 6.686644554 | <a href="https://www.genecards.org/cgi-bin/carddisp.pl?gene=DPM3">https://www.genecards.org/cgi-bin/carddisp.pl?gene=DPM3</a>         |
| GPT      | Glutamic--Pyruvic Transaminase                                                  | Protein coding | 41 | GC08P144502 | 6.68070364  | <a href="https://www.genecards.org/cgi-bin/carddisp.pl?gene=GPT">https://www.genecards.org/cgi-bin/carddisp.pl?gene=GPT</a>           |
| TTN      | Titin                                                                           | Protein coding | 47 | GC02M178525 | 6.658669949 | <a href="https://www.genecards.org/cgi-bin/carddisp.pl?gene=TTN">https://www.genecards.org/cgi-bin/carddisp.pl?gene=TTN</a>           |
| HFE      | Homeostatic Iron Regulator                                                      | Protein coding | 43 | GC06P026087 | 6.654267311 | <a href="https://www.genecards.org/cgi-bin/carddisp.pl?gene=HFE">https://www.genecards.org/cgi-bin/carddisp.pl?gene=HFE</a>           |
| FLT1     | Fms Related Receptor Tyrosine Kinase 1                                          | Protein coding | 50 | GC13M028300 | 6.649538994 | <a href="https://www.genecards.org/cgi-bin/carddisp.pl?gene=FLT1">https://www.genecards.org/cgi-bin/carddisp.pl?gene=FLT1</a>         |
| CNTF     | Ciliary Neurotrophic Factor                                                     | Protein coding | 41 | GC11P058622 | 6.621702194 | <a href="https://www.genecards.org/cgi-bin/carddisp.pl?gene=CNTF">https://www.genecards.org/cgi-bin/carddisp.pl?gene=CNTF</a>         |
| CTF1     | Cardiotrophin 1                                                                 | Protein coding | 38 | GC16P033495 | 6.609263897 | <a href="https://www.genecards.org/cgi-bin/carddisp.pl?gene=CTF1">https://www.genecards.org/cgi-bin/carddisp.pl?gene=CTF1</a>         |
| GRIN2A   | Glutamate Ionotropic Receptor NMDA Type Subunit 2A                              | Protein coding | 52 | GC16M009753 | 6.60088253  | <a href="https://www.genecards.org/cgi-bin/carddisp.pl?gene=GRIN2A">https://www.genecards.org/cgi-bin/carddisp.pl?gene=GRIN2A</a>     |
| MTX2     | Metaxin 2                                                                       | Protein coding | 41 | GC02P176269 | 6.568894386 | <a href="https://www.genecards.org/cgi-bin/carddisp.pl?gene=MTX2">https://www.genecards.org/cgi-bin/carddisp.pl?gene=MTX2</a>         |
| MYMY1    | Moyamoya Disease 1                                                              | Genetic locus  | 2  | GC03U900234 | 6.556677818 | <a href="https://www.genecards.org/cgi-bin/carddisp.pl?gene=MYMY1">https://www.genecards.org/cgi-bin/carddisp.pl?gene=MYMY1</a>       |
| MYMY3    | Moyamoya Disease 3                                                              | Genetic locus  | 2  | GC08U900539 | 6.556677818 | <a href="https://www.genecards.org/cgi-bin/carddisp.pl?gene=MYMY3">https://www.genecards.org/cgi-bin/carddisp.pl?gene=MYMY3</a>       |
| CITED2   | Cbp/P300 Interacting Transactivator With Glu/Asp Rich Carboxy-Terminal Domain 2 | Protein coding | 43 | GC06M139371 | 6.509186268 | <a href="https://www.genecards.org/cgi-bin/carddisp.pl?gene=CITED2">https://www.genecards.org/cgi-bin/carddisp.pl?gene=CITED2</a>     |
| CCND1    | Cyclin D1                                                                       | Protein coding | 52 | GC11P069641 | 6.502706528 | <a href="https://www.genecards.org/cgi-bin/carddisp.pl?gene=CCND1">https://www.genecards.org/cgi-bin/carddisp.pl?gene=CCND1</a>       |
| JAG1     | Jagged Canonical Notch Ligand 1                                                 | Protein coding | 50 | GC20M010637 | 6.497455597 | <a href="https://www.genecards.org/cgi-bin/carddisp.pl?gene=JAG1">https://www.genecards.org/cgi-bin/carddisp.pl?gene=JAG1</a>         |
| SRFBP1   | Serum Response Factor Binding Protein 1                                         | Protein coding | 33 | GC05P121961 | 6.463252068 | <a href="https://www.genecards.org/cgi-bin/carddisp.pl?gene=SRFBP1">https://www.genecards.org/cgi-bin/carddisp.pl?gene=SRFBP1</a>     |
| VDR      | Vitamin D Receptor                                                              | Protein coding | 51 | GC12M047841 | 6.409247398 | <a href="https://www.genecards.org/cgi-bin/carddisp.pl?gene=VDR">https://www.genecards.org/cgi-bin/carddisp.pl?gene=VDR</a>           |
| NR3C1    | Nuclear Receptor Subfamily 3 Group C Member 1                                   | Protein coding | 50 | GC05M143277 | 6.406597137 | <a href="https://www.genecards.org/cgi-bin/carddisp.pl?gene=NR3C1">https://www.genecards.org/cgi-bin/carddisp.pl?gene=NR3C1</a>       |
| PCSK9    | Proprotein Convertase Subtilisin/Kexin Type 9                                   | Protein coding | 50 | GC01P055039 | 6.403251648 | <a href="https://www.genecards.org/cgi-bin/carddisp.pl?gene=PCSK9">https://www.genecards.org/cgi-bin/carddisp.pl?gene=PCSK9</a>       |
| ABCB1    | ATP Binding Cassette Subfamily B Member 1                                       | Protein coding | 51 | GC07M087504 | 6.385769844 | <a href="https://www.genecards.org/cgi-bin/carddisp.pl?gene=ABCB1">https://www.genecards.org/cgi-bin/carddisp.pl?gene=ABCB1</a>       |
| TCF7L2   | Transcription Factor 7 Like 2                                                   | Protein coding | 46 | GC10P112950 | 6.385392189 | <a href="https://www.genecards.org/cgi-bin/carddisp.pl?gene=TCF7L2">https://www.genecards.org/cgi-bin/carddisp.pl?gene=TCF7L2</a>     |
| MMUT     | Methylmalonyl-CoA Mutase                                                        | Protein coding | 36 | GC06M049430 | 6.383408546 | <a href="https://www.genecards.org/cgi-bin/carddisp.pl?gene=MMUT">https://www.genecards.org/cgi-bin/carddisp.pl?gene=MMUT</a>         |
| MEN1     | Menin 1                                                                         | Protein coding | 46 | GC11M064803 | 6.377994537 | <a href="https://www.genecards.org/cgi-bin/carddisp.pl?gene=MEN1">https://www.genecards.org/cgi-bin/carddisp.pl?gene=MEN1</a>         |
| CD34     | CD34 Molecule                                                                   | Protein coding | 43 | GC01M207880 | 6.371311188 | <a href="https://www.genecards.org/cgi-bin/carddisp.pl?gene=CD34">https://www.genecards.org/cgi-bin/carddisp.pl?gene=CD34</a>         |
| CTLA4    | Cytotoxic T-Lymphocyte Associated Protein 4                                     | Protein coding | 45 | GC02P203867 | 6.365667343 | <a href="https://www.genecards.org/cgi-bin/carddisp.pl?gene=CTLA4">https://www.genecards.org/cgi-bin/carddisp.pl?gene=CTLA4</a>       |
| TIMP1    | TIMP Metallopeptidase Inhibitor 1                                               | Protein coding | 44 | GC0XP047583 | 6.350315094 | <a href="https://www.genecards.org/cgi-bin/carddisp.pl?gene=TIMP1">https://www.genecards.org/cgi-bin/carddisp.pl?gene=TIMP1</a>       |
| COL2A1   | Collagen Type II $\alpha$ 1 Chain                                               | Protein coding | 48 | GC12M047972 | 6.345514774 | <a href="https://www.genecards.org/cgi-bin/carddisp.pl?gene=COL2A1">https://www.genecards.org/cgi-bin/carddisp.pl?gene=COL2A1</a>     |
| UCP2     | Uncoupling Protein 2                                                            | Protein coding | 45 | GC11M073974 | 6.340950012 | <a href="https://www.genecards.org/cgi-bin/carddisp.pl?gene=UCP2">https://www.genecards.org/cgi-bin/carddisp.pl?gene=UCP2</a>         |
| PRL      | Prolactin                                                                       | Protein coding | 43 | GC06M022287 | 6.287054062 | <a href="https://www.genecards.org/cgi-bin/carddisp.pl?gene=PRL">https://www.genecards.org/cgi-bin/carddisp.pl?gene=PRL</a>           |
| TMEM126B | Transmembrane Protein 126B                                                      | Protein coding | 38 | GC11P085628 | 6.272479057 | <a href="https://www.genecards.org/cgi-bin/carddisp.pl?gene=TMEM126B">https://www.genecards.org/cgi-bin/carddisp.pl?gene=TMEM126B</a> |
| INSL6    | Insulin Like 6                                                                  | Protein coding | 35 | GC09M004991 | 6.268529892 | <a href="https://www.genecards.org/cgi-bin/carddisp.pl?gene=INSL6">https://www.genecards.org/cgi-bin/carddisp.pl?gene=INSL6</a>       |
| PRKAG2   | Protein Kinase AMP-Activated Non-Catalytic Subunit $\gamma$ 2                   | Protein coding | 50 | GC07M151556 | 6.262793064 | <a href="https://www.genecards.org/cgi-bin/carddisp.pl?gene=PRKAG2">https://www.genecards.org/cgi-bin/carddisp.pl?gene=PRKAG2</a>     |
| HLA-B    | Major Histocompatibility Complex, Class I, B                                    | Protein coding | 47 | GC06M049073 | 6.256195068 | <a href="https://www.genecards.org/cgi-bin/carddisp.pl?gene=HLA-B">https://www.genecards.org/cgi-bin/carddisp.pl?gene=HLA-B</a>       |
| SELL     | Selectin L                                                                      | Protein coding | 43 | GC01M169690 | 6.232209206 | <a href="https://www.genecards.org/cgi-bin/carddisp.pl?gene=SELL">https://www.genecards.org/cgi-bin/carddisp.pl?gene=SELL</a>         |
| GNB1     | G Protein Subunit $\beta$ 1                                                     | Protein coding | 45 | GC01M001785 | 6.23182106  | <a href="https://www.genecards.org/cgi-bin/carddisp.pl?gene=GNB1">https://www.genecards.org/cgi-bin/carddisp.pl?gene=GNB1</a>         |
| FLNA     | Filamin A                                                                       | Protein coding | 49 | GC0XM154348 | 6.213269711 | <a href="https://www.genecards.org/cgi-bin/carddisp.pl?gene=FLNA">https://www.genecards.org/cgi-bin/carddisp.pl?gene=FLNA</a>         |
| RPS27A   | Ribosomal Protein S27a                                                          | Protein coding | 43 | GC02P055231 | 6.21207428  | <a href="https://www.genecards.org/cgi-bin/carddisp.pl?gene=RPS27A">https://www.genecards.org/cgi-bin/carddisp.pl?gene=RPS27A</a>     |
| KL       | Klotho                                                                          | Protein coding | 45 | GC13P033016 | 6.203378677 | <a href="https://www.genecards.org/cgi-bin/carddisp.pl?gene=KL">https://www.genecards.org/cgi-bin/carddisp.pl?gene=KL</a>             |
| CYP4F2   | Cytochrome P450 Family 4 Subfamily F Member 2                                   | Protein coding | 45 | GC19M015878 | 6.202888966 | <a href="https://www.genecards.org/cgi-bin/carddisp.pl?gene=CYP4F2">https://www.genecards.org/cgi-bin/carddisp.pl?gene=CYP4F2</a>     |
| CUX2     | Cut Like Homeobox 2                                                             | Protein coding | 41 | GC12P111034 | 6.197788715 | <a href="https://www.genecards.org/cgi-bin/carddisp.pl?gene=CUX2">https://www.genecards.org/cgi-bin/carddisp.pl?gene=CUX2</a>         |
| NINJ2    | Ninjurin 2                                                                      | Protein coding | 34 | GC12M000564 | 6.178388596 | <a href="https://www.genecards.org/cgi-bin/carddisp.pl?gene=NINJ2">https://www.genecards.org/cgi-bin/carddisp.pl?gene=NINJ2</a>       |
| NSD1     | Nuclear Receptor Binding SET Domain Protein 1                                   | Protein coding | 43 | GC05P177134 | 6.171768188 | <a href="https://www.genecards.org/cgi-bin/carddisp.pl?gene=NSD1">https://www.genecards.org/cgi-bin/carddisp.pl?gene=NSD1</a>         |
| CSF2     | Colony Stimulating Factor 2                                                     | Protein coding | 43 | GC05P132073 | 6.16844368  | <a href="https://www.genecards.org/cgi-bin/carddisp.pl?gene=CSF2">https://www.genecards.org/cgi-bin/carddisp.pl?gene=CSF2</a>         |
| FLNC     | Filamin C                                                                       | Protein coding | 45 | GC07P128830 | 6.161774635 | <a href="https://www.genecards.org/cgi-bin/carddisp.pl?gene=FLNC">https://www.genecards.org/cgi-bin/carddisp.pl?gene=FLNC</a>         |
| PTPN11   | Protein Tyrosine Phosphatase Non-Receptor Type 11                               | Protein coding | 52 | GC12P112418 | 6.160317421 | <a href="https://www.genecards.org/cgi-bin/carddisp.pl?gene=PTPN11">https://www.genecards.org/cgi-bin/carddisp.pl?gene=PTPN11</a>     |
| MYMY4    | Moyamoya Disease 4                                                              | Genetic locus  | 1  | GC0XU901754 | 6.15953064  | <a href="https://www.genecards.org/cgi-bin/carddisp.pl?gene=MYMY4">https://www.genecards.org/cgi-bin/carddisp.pl?gene=MYMY4</a>       |
| PPARA    | Peroxisome Proliferator Activated Receptor $\alpha$                             | Protein coding | 46 | GC22P046150 | 6.144661427 | <a href="https://www.genecards.org/cgi-bin/carddisp.pl?gene=PPARA">https://www.genecards.org/cgi-bin/carddisp.pl?gene=PPARA</a>       |
| MMP1     | Matrix Metallopeptidase 1                                                       | Protein coding | 51 | GC11M102810 | 6.144601822 | <a href="https://www.genecards.org/cgi-bin/carddisp.pl?gene=MMP1">https://www.genecards.org/cgi-bin/carddisp.pl?gene=MMP1</a>         |
| FCGR2A   | Fc Fragment Of IgG Receptor IIa                                                 | Protein coding | 45 | GC01P161505 | 6.140078545 | <a href="https://www.genecards.org/cgi-bin/carddisp.pl?gene=FCGR2A">https://www.genecards.org/cgi-bin/carddisp.pl?gene=FCGR2A</a>     |
| GRIN2B   | Glutamate Ionotropic Receptor NMDA Type Subunit 2B                              | Protein coding | 51 | GC12M013437 | 6.122282028 | <a href="https://www.genecards.org/cgi-bin/carddisp.pl?gene=GRIN2B">https://www.genecards.org/cgi-bin/carddisp.pl?gene=GRIN2B</a>     |
| ACHE     | Acetylcholinesterase (Cartwright Blood Group)                                   | Protein coding | 46 | GC07M100889 | 6.094027519 | <a href="https://www.genecards.org/cgi-bin/carddisp.pl?gene=ACHE">https://www.genecards.org/cgi-bin/carddisp.pl?gene=ACHE</a>         |
| MAN2B1   | Mannosidase $\alpha$ Class 2B Member 1                                          | Protein coding | 44 | GC19M012663 | 6.082442284 | <a href="https://www.genecards.org/cgi-bin/carddisp.pl?gene=MAN2B1">https://www.genecards.org/cgi-bin/carddisp.pl?gene=MAN2B1</a>     |
| GJA5     | Gap Junction Protein $\alpha$ 5                                                 | Protein coding | 45 | GC01M147756 | 6.081840515 | <a href="https://www.genecards.org/cgi-bin/carddisp.pl?gene=GJA5">https://www.genecards.org/cgi-bin/carddisp.pl?gene=GJA5</a>         |
| CPS1     | Carbamoyl-Phosphate Synthase 1                                                  | Protein coding | 45 | GC02P210477 | 6.060049534 | <a href="https://www.genecards.org/cgi-bin/carddisp.pl?gene=CPS1">https://www.genecards.org/cgi-bin/carddisp.pl?gene=CPS1</a>         |
| COL4A5   | Collagen Type IV $\alpha$ 5 Chain                                               | Protein coding | 44 | GC0XP108439 | 6.040412903 | <a href="https://www.genecards.org/cgi-bin/carddisp.pl?gene=COL4A5">https://www.genecards.org/cgi-bin/carddisp.pl?gene=COL4A5</a>     |
| NLRP3    | NLR Family Pyrin Domain Containing 3                                            | Protein coding | 47 | GC01P247415 | 6.026886463 | <a href="https://www.genecards.org/cgi-bin/carddisp.pl?gene=NLRP3">https://www.genecards.org/cgi-bin/carddisp.pl?gene=NLRP3</a>       |
| NPR3     | Natriuretic Peptide Receptor 3                                                  | Protein coding | 44 | GC05P032689 | 6.026222229 | <a href="https://www.genecards.org/cgi-bin/carddisp.pl?gene=NPR3">https://www.genecards.org/cgi-bin/carddisp.pl?gene=NPR3</a>         |
| CDK5     | Cyclin Dependent Kinase 5                                                       | Protein coding | 52 | GC07M151053 | 6.021576881 | <a href="https://www.genecards.org/cgi-bin/carddisp.pl?gene=CDK5">https://www.genecards.org/cgi-bin/carddisp.pl?gene=CDK5</a>         |
| IL17A    | Interleukin 17A                                                                 | Protein coding | 41 | GC06P052186 | 5.995017052 | <a href="https://www.genecards.org/cgi-bin/carddisp.pl?gene=IL17A">https://www.genecards.org/cgi-bin/carddisp.pl?gene=IL17A</a>       |

|          |                                                                                                   |                |    |             |             |                                                             |
|----------|---------------------------------------------------------------------------------------------------|----------------|----|-------------|-------------|-------------------------------------------------------------|
| CPB2     | Carboxypeptidase B2                                                                               | Protein coding | 44 | GC13M046053 | 5.991405487 | https://www.genecards.org/cgi-bin/carddisp.pl?gene=CPB2     |
| XDH      | Xanthine Dehydrogenase                                                                            | Protein coding | 47 | GC02M031334 | 5.976667404 | https://www.genecards.org/cgi-bin/carddisp.pl?gene=XDH      |
| CDKN2B   | Cyclin Dependent Kinase Inhibitor 2B                                                              | Protein coding | 47 | GC09M022002 | 5.958500862 | https://www.genecards.org/cgi-bin/carddisp.pl?gene=CDKN2B   |
| HTR2A    | 5-Hydroxytryptamine Receptor 2A                                                                   | Protein coding | 48 | GC13M046831 | 5.9424963   | https://www.genecards.org/cgi-bin/carddisp.pl?gene=HTR2A    |
| ACAN     | Aggrecan                                                                                          | Protein coding | 47 | GC15P088813 | 5.935297012 | https://www.genecards.org/cgi-bin/carddisp.pl?gene=ACAN     |
| XBP1     | X-Box Binding Protein 1                                                                           | Protein coding | 45 | GC22M028794 | 5.928098679 | https://www.genecards.org/cgi-bin/carddisp.pl?gene=XBP1     |
| FKRP     | Fukutin Related Protein                                                                           | Protein coding | 40 | GC19P046746 | 5.892821312 | https://www.genecards.org/cgi-bin/carddisp.pl?gene=FKRP     |
| PTX3     | Pentraxin 3                                                                                       | Protein coding | 41 | GC03P157436 | 5.882364273 | https://www.genecards.org/cgi-bin/carddisp.pl?gene=PTX3     |
| CAT      | Catalase                                                                                          | Protein coding | 49 | GC11P034460 | 5.872531891 | https://www.genecards.org/cgi-bin/carddisp.pl?gene=CAT      |
| TANGO2   | Transport And Golgi Organization 2 Homolog                                                        | Protein coding | 35 | GC22P020017 | 5.871419907 | https://www.genecards.org/cgi-bin/carddisp.pl?gene=TANGO2   |
| GSTM1    | Glutathione S-Transferase $\mu$ 1                                                                 | Protein coding | 42 | GC01P109687 | 5.868401051 | https://www.genecards.org/cgi-bin/carddisp.pl?gene=GSTM1    |
| CYP2J2   | Cytochrome P450 Family 2 Subfamily J Member 2                                                     | Protein coding | 44 | GC01M059893 | 5.868251324 | https://www.genecards.org/cgi-bin/carddisp.pl?gene=CYP2J2   |
| CX3CR1   | C-X3-C Motif Chemokine Receptor 1                                                                 | Protein coding | 45 | GC03M039279 | 5.849345207 | https://www.genecards.org/cgi-bin/carddisp.pl?gene=CX3CR1   |
| SLC34A1  | Solute Carrier Family 34 Member 1                                                                 | Protein coding | 44 | GC05P177380 | 5.838026524 | https://www.genecards.org/cgi-bin/carddisp.pl?gene=SLC34A1  |
| TWNK     | Twinkle MtDNA Helicase                                                                            | Protein coding | 33 | GC10P100993 | 5.832365513 | https://www.genecards.org/cgi-bin/carddisp.pl?gene=TWNK     |
| ATP1B1   | ATPase Na+/K+ Transporting Subunit $\beta$ 1                                                      | Protein coding | 47 | GC01P169105 | 5.826225758 | https://www.genecards.org/cgi-bin/carddisp.pl?gene=ATP1B1   |
| SERPINA1 | Serpin Family A Member 1                                                                          | Protein coding | 48 | GC14M094376 | 5.806275368 | https://www.genecards.org/cgi-bin/carddisp.pl?gene=SERPINA1 |
| ATP1A2   | ATPase Na+/K+ Transporting Subunit $\alpha$ 2                                                     | Protein coding | 48 | GC01P160115 | 5.804023743 | https://www.genecards.org/cgi-bin/carddisp.pl?gene=ATP1A2   |
| FH       | Fumarate Hydratase                                                                                | Protein coding | 45 | GC01M241499 | 5.783442974 | https://www.genecards.org/cgi-bin/carddisp.pl?gene=FH       |
| SMARCA4  | SWI/SNF Related, Matrix Associated, Actin Dependent Regulator Of Chromatin, Subfamily A, Member 4 | Protein coding | 49 | GC19P010932 | 5.751421452 | https://www.genecards.org/cgi-bin/carddisp.pl?gene=SMARCA4  |
| PARP1    | Poly(ADP-Ribose) Polymerase 1                                                                     | Protein coding | 49 | GC01M226360 | 5.74087286  | https://www.genecards.org/cgi-bin/carddisp.pl?gene=PARP1    |
| GHRL     | Ghrelin And Obestatin Prepropeptide                                                               | Protein coding | 43 | GC03M010285 | 5.738366604 | https://www.genecards.org/cgi-bin/carddisp.pl?gene=GHRL     |
| TLL1     | Tolloid Like 1                                                                                    | Protein coding | 43 | GC04P165873 | 5.724071503 | https://www.genecards.org/cgi-bin/carddisp.pl?gene=TLL1     |
| TF       | Transferrin                                                                                       | Protein coding | 48 | GC03P133666 | 5.720663071 | https://www.genecards.org/cgi-bin/carddisp.pl?gene=TF       |
| POU4F1   | POU Class 4 Homeobox 1                                                                            | Protein coding | 39 | GC13M078598 | 5.715135098 | https://www.genecards.org/cgi-bin/carddisp.pl?gene=POU4F1   |
| PKD2     | Polycystin 2, Transient Receptor Potential Cation Channel                                         | Protein coding | 47 | GC04P088007 | 5.708503246 | https://www.genecards.org/cgi-bin/carddisp.pl?gene=PKD2     |
| CELA2A   | Chymotrypsin Like Elastase 2A                                                                     | Protein coding | 39 | GC01P015456 | 5.708503246 | https://www.genecards.org/cgi-bin/carddisp.pl?gene=CELA2A   |
| PDGFRA   | Platelet Derived Growth Factor Receptor $\alpha$                                                  | Protein coding | 54 | GC04P054229 | 5.689031601 | https://www.genecards.org/cgi-bin/carddisp.pl?gene=PDGFRA   |
| ITIH4    | Inter- $\alpha$ -Trypsin Inhibitor Heavy Chain 4                                                  | Protein coding | 42 | GC03M052812 | 5.669485569 | https://www.genecards.org/cgi-bin/carddisp.pl?gene=ITIH4    |
| CCL11    | C-C Motif Chemokine Ligand 11                                                                     | Protein coding | 43 | GC17P034285 | 5.658752918 | https://www.genecards.org/cgi-bin/carddisp.pl?gene=CCL11    |
| MBL2     | Mannose Binding Lectin 2                                                                          | Protein coding | 47 | GC10M052760 | 5.652535915 | https://www.genecards.org/cgi-bin/carddisp.pl?gene=MBL2     |
| MT-ATP8  | Mitochondrially Encoded ATP Synthase Membrane Subunit 8                                           | Protein coding | 31 | GCMTP008368 | 5.645841122 | https://www.genecards.org/cgi-bin/carddisp.pl?gene=MT-ATP8  |
| BGLAP    | Bone $\gamma$ -Carboxyglutamate Protein                                                           | Protein coding | 40 | GC01P156242 | 5.643784523 | https://www.genecards.org/cgi-bin/carddisp.pl?gene=BGLAP    |
| LTC4S    | Leukotriene C4 Synthase                                                                           | Protein coding | 42 | GC05P179793 | 5.623233318 | https://www.genecards.org/cgi-bin/carddisp.pl?gene=LTC4S    |
| MTR      | 5-Methyltetrahydrofolate-Homocysteine Methyltransferase                                           | Protein coding | 47 | GC01P236795 | 5.59706974  | https://www.genecards.org/cgi-bin/carddisp.pl?gene=MTR      |
| HYT1     | Hypertension, Essential, Susceptibility To, 1                                                     | Genetic locus  | 1  | GC17U990303 | 5.587248802 | https://www.genecards.org/cgi-bin/carddisp.pl?gene=HYT1     |
| HNF1A    | HNF1 Homeobox A                                                                                   | Protein coding | 45 | GC12P120978 | 5.578286648 | https://www.genecards.org/cgi-bin/carddisp.pl?gene=HNF1A    |
| HSPA5    | Heat Shock Protein Family A (Hsp70) Member 5                                                      | Protein coding | 47 | GC09M125234 | 5.575797558 | https://www.genecards.org/cgi-bin/carddisp.pl?gene=HSPA5    |
| GRN      | Granulin Precursor                                                                                | Protein coding | 46 | GC17P044345 | 5.566358566 | https://www.genecards.org/cgi-bin/carddisp.pl?gene=GRN      |
| VHL      | Von Hippel-Lindau Tumor Suppressor                                                                | Protein coding | 45 | GC03P011127 | 5.543662071 | https://www.genecards.org/cgi-bin/carddisp.pl?gene=VHL      |
| NEFL     | Neurofilament Light Chain                                                                         | Protein coding | 46 | GC08M024950 | 5.541169167 | https://www.genecards.org/cgi-bin/carddisp.pl?gene=NEFL     |
| IL2      | Interleukin 2                                                                                     | Protein coding | 44 | GC04M122451 | 5.53144455  | https://www.genecards.org/cgi-bin/carddisp.pl?gene=IL2      |
| MIR132   | MicroRNA 132                                                                                      | RNA gene       | 22 | GC17M002049 | 5.52125597  | https://www.genecards.org/cgi-bin/carddisp.pl?gene=MIR132   |
| MMP12    | Matrix Metallopeptidase 12                                                                        | Protein coding | 45 | GC11M102862 | 5.503199577 | https://www.genecards.org/cgi-bin/carddisp.pl?gene=MMP12    |
| SCNN1A   | Sodium Channel Epithelial 1 Subunit $\alpha$                                                      | Protein coding | 47 | GC12M006346 | 5.501520157 | https://www.genecards.org/cgi-bin/carddisp.pl?gene=SCNN1A   |
| RGS5     | Regulator Of G Protein Signaling 5                                                                | Protein coding | 40 | GC01M163111 | 5.500445366 | https://www.genecards.org/cgi-bin/carddisp.pl?gene=RGS5     |
| HYT2     | Hypertension, Essential, Susceptibility To, 2                                                     | Genetic locus  | 1  | GC15U990105 | 5.500445366 | https://www.genecards.org/cgi-bin/carddisp.pl?gene=HYT2     |
| HYT3     | Hypertension, Essential, Susceptibility To, 3                                                     | Genetic locus  | 1  | GC02U900228 | 5.500445366 | https://www.genecards.org/cgi-bin/carddisp.pl?gene=HYT3     |
| HYT4     | Hypertension, Essential, Susceptibility To, 4                                                     | Genetic locus  | 1  | GC12U900475 | 5.500445366 | https://www.genecards.org/cgi-bin/carddisp.pl?gene=HYT4     |
| HYT5     | Hypertension, Essential, Susceptibility To, 5                                                     | Genetic locus  | 1  | GC20U900425 | 5.500445366 | https://www.genecards.org/cgi-bin/carddisp.pl?gene=HYT5     |
| HYT6     | Hypertension, Essential, Susceptibility To, 6                                                     | Genetic locus  | 1  | GC05U901045 | 5.500445366 | https://www.genecards.org/cgi-bin/carddisp.pl?gene=HYT6     |
| HYT7     | Hypertension, Essential, Susceptibility To, 7                                                     | Genetic locus  | 1  | GC03U901240 | 5.500445366 | https://www.genecards.org/cgi-bin/carddisp.pl?gene=HYT7     |
| HYT8     | Hypertension, Essential, Susceptibility To, 8                                                     | Genetic locus  | 1  | GC18U900482 | 5.500445366 | https://www.genecards.org/cgi-bin/carddisp.pl?gene=HYT8     |
| TBX5     | T-Box Transcription Factor 5                                                                      | Protein coding | 46 | GC12M114353 | 5.481939793 | https://www.genecards.org/cgi-bin/carddisp.pl?gene=TBX5     |
| MIR145   | MicroRNA 145                                                                                      | RNA gene       | 22 | GC05P149430 | 5.474709034 | https://www.genecards.org/cgi-bin/carddisp.pl?gene=MIR145   |
| MIR9-1   | MicroRNA 9-1                                                                                      | RNA gene       | 21 | GC01M156420 | 5.458321095 | https://www.genecards.org/cgi-bin/carddisp.pl?gene=MIR9-1   |
| BRAF     | B-Raf Proto-Oncogene, Serine/Threonine Kinase                                                     | Protein coding | 53 | GC07M140718 | 5.424529552 | https://www.genecards.org/cgi-bin/carddisp.pl?gene=BRAF     |
| MYL4     | Myosin Light Chain 4                                                                              | Protein coding | 44 | GC17P047200 | 5.417258263 | https://www.genecards.org/cgi-bin/carddisp.pl?gene=MYL4     |
| CD40     | CD40 Molecule                                                                                     | Protein coding | 47 | GC20P046118 | 5.402803421 | https://www.genecards.org/cgi-bin/carddisp.pl?gene=CD40     |
| IGFBP3   | Insulin Like Growth Factor Binding Protein 3                                                      | Protein coding | 44 | GC07M045912 | 5.402165413 | https://www.genecards.org/cgi-bin/carddisp.pl?gene=IGFBP3   |
| OTC      | Ornithine Transcarbamylase                                                                        | Protein coding | 47 | GC0XP038353 | 5.34236145  | https://www.genecards.org/cgi-bin/carddisp.pl?gene=OTC      |
| IL13     | Interleukin 13                                                                                    | Protein coding | 44 | GC05P132656 | 5.335382462 | https://www.genecards.org/cgi-bin/carddisp.pl?gene=IL13     |
| FAS      | Fas Cell Surface Death Receptor                                                                   | Protein coding | 50 | GC10P088969 | 5.331914425 | https://www.genecards.org/cgi-bin/carddisp.pl?gene=FAS      |
| TBXAS1   | Thromboxane A Synthase 1                                                                          | Protein coding | 51 | GC07P139777 | 5.312111378 | https://www.genecards.org/cgi-bin/carddisp.pl?gene=TBXAS1   |
| IL1R1    | Interleukin 1 Receptor Type 1                                                                     | Protein coding | 45 | GC02P102136 | 5.310017109 | https://www.genecards.org/cgi-bin/carddisp.pl?gene=IL1R1    |
| ACE2     | Angiotensin Converting Enzyme 2                                                                   | Protein coding | 48 | GC0XM015494 | 5.309986115 | https://www.genecards.org/cgi-bin/carddisp.pl?gene=ACE2     |
| SLC1A1   | Solute Carrier Family 1 Member 1                                                                  | Protein coding | 48 | GC09P004490 | 5.309069633 | https://www.genecards.org/cgi-bin/carddisp.pl?gene=SLC1A1   |
| ABCC8    | ATP Binding Cassette Subfamily C Member 8                                                         | Protein coding | 46 | GC11M017392 | 5.30683136  | https://www.genecards.org/cgi-bin/carddisp.pl?gene=ABCC8    |
| ABO      | ABO, $\alpha$ 1-3-N-Acetylglactosaminyltransferase And $\alpha$ 1-3-Galactosyltransferase         | Protein coding | 36 | GC09M133250 | 5.300428867 | https://www.genecards.org/cgi-bin/carddisp.pl?gene=ABO      |
| MAPK14   | Mitogen-Activated Protein Kinase 14                                                               | Protein coding | 51 | GC06P058451 | 5.297143936 | https://www.genecards.org/cgi-bin/carddisp.pl?gene=MAPK14   |
| BCL2     | BCL2 Apoptosis Regulator                                                                          | Protein coding | 50 | GC18M063123 | 5.294238091 | https://www.genecards.org/cgi-bin/carddisp.pl?gene=BCL2     |
| CS       | Citrate Synthase                                                                                  | Protein coding | 44 | GC12M056271 | 5.291215897 | https://www.genecards.org/cgi-bin/carddisp.pl?gene=CS       |
| PPOX     | Protoporphyrinogen Oxidase                                                                        | Protein coding | 44 | GC01P161205 | 5.275152206 | https://www.genecards.org/cgi-bin/carddisp.pl?gene=PPOX     |
| GBA      | Glucosylceramidase $\beta$                                                                        | Protein coding | 47 | GC01M155234 | 5.259410858 | https://www.genecards.org/cgi-bin/carddisp.pl?gene=GBA      |
| TLR2     | Toll Like Receptor 2                                                                              | Protein coding | 50 | GC04P153684 | 5.254338264 | https://www.genecards.org/cgi-bin/carddisp.pl?gene=TLR2     |

|          |                                                                                                |                |    |             |             |                                                                                                                                       |
|----------|------------------------------------------------------------------------------------------------|----------------|----|-------------|-------------|---------------------------------------------------------------------------------------------------------------------------------------|
| ERCC6    | ERCC Excision Repair 6, Chromatin Remodeling Factor                                            | Protein coding | 45 | GC10M049454 | 5.253311634 | <a href="https://www.genecards.org/cgi-bin/carddisp.pl?gene=ERCC6">https://www.genecards.org/cgi-bin/carddisp.pl?gene=ERCC6</a>       |
| IL6R     | Interleukin 6 Receptor                                                                         | Protein coding | 48 | GC01P154405 | 5.248811245 | <a href="https://www.genecards.org/cgi-bin/carddisp.pl?gene=IL6R">https://www.genecards.org/cgi-bin/carddisp.pl?gene=IL6R</a>         |
| IAPP     | Islet Amyloid Polypeptide                                                                      | Protein coding | 41 | GC12P021354 | 5.236206055 | <a href="https://www.genecards.org/cgi-bin/carddisp.pl?gene=IAPP">https://www.genecards.org/cgi-bin/carddisp.pl?gene=IAPP</a>         |
| FOS      | Fos Proto-Oncogene, AP-1 Transcription Factor Subunit                                          | Protein coding | 50 | GC14P075278 | 5.23579073  | <a href="https://www.genecards.org/cgi-bin/carddisp.pl?gene=FOS">https://www.genecards.org/cgi-bin/carddisp.pl?gene=FOS</a>           |
| SMARCAL1 | SWI/SNF Related, Matrix Associated, Actin Dependent Regulator Of Chromatin, Subfamily A Like 1 | Protein coding | 43 | GC02P216412 | 5.2317729   | <a href="https://www.genecards.org/cgi-bin/carddisp.pl?gene=SMARCAL1">https://www.genecards.org/cgi-bin/carddisp.pl?gene=SMARCAL1</a> |
| LRP1     | LDL Receptor Related Protein 1                                                                 | Protein coding | 47 | GC12P057128 | 5.228310585 | <a href="https://www.genecards.org/cgi-bin/carddisp.pl?gene=LRP1">https://www.genecards.org/cgi-bin/carddisp.pl?gene=LRP1</a>         |
| MGP      | Matrix Gla Protein                                                                             | Protein coding | 42 | GC12M016385 | 5.221977234 | <a href="https://www.genecards.org/cgi-bin/carddisp.pl?gene=MGP">https://www.genecards.org/cgi-bin/carddisp.pl?gene=MGP</a>           |
| SURF1    | SURF1 Cytochrome C Oxidase Assembly Factor                                                     | Protein coding | 43 | GC09M133351 | 5.201442719 | <a href="https://www.genecards.org/cgi-bin/carddisp.pl?gene=SURF1">https://www.genecards.org/cgi-bin/carddisp.pl?gene=SURF1</a>       |
| PCNT     | Pericentrin                                                                                    | Protein coding | 42 | GC21P046324 | 5.201153278 | <a href="https://www.genecards.org/cgi-bin/carddisp.pl?gene=PCNT">https://www.genecards.org/cgi-bin/carddisp.pl?gene=PCNT</a>         |
| IL4R     | Interleukin 4 Receptor                                                                         | Protein coding | 47 | GC16P027325 | 5.197076797 | <a href="https://www.genecards.org/cgi-bin/carddisp.pl?gene=IL4R">https://www.genecards.org/cgi-bin/carddisp.pl?gene=IL4R</a>         |
| TFPI     | Tissue Factor Pathway Inhibitor                                                                | Protein coding | 44 | GC02M187464 | 5.195569992 | <a href="https://www.genecards.org/cgi-bin/carddisp.pl?gene=TFPI">https://www.genecards.org/cgi-bin/carddisp.pl?gene=TFPI</a>         |
| CD36     | CD36 Molecule                                                                                  | Protein coding | 48 | GC07P080369 | 5.180634499 | <a href="https://www.genecards.org/cgi-bin/carddisp.pl?gene=CD36">https://www.genecards.org/cgi-bin/carddisp.pl?gene=CD36</a>         |
| DKK1     | Dickkopf WNT Signaling Pathway Inhibitor 1                                                     | Protein coding | 44 | GC10P052314 | 5.169650078 | <a href="https://www.genecards.org/cgi-bin/carddisp.pl?gene=DKK1">https://www.genecards.org/cgi-bin/carddisp.pl?gene=DKK1</a>         |
| CFH      | Complement Factor H                                                                            | Protein coding | 45 | GC01P196621 | 5.166233063 | <a href="https://www.genecards.org/cgi-bin/carddisp.pl?gene=CFH">https://www.genecards.org/cgi-bin/carddisp.pl?gene=CFH</a>           |
| OPN4     | Opsin 4                                                                                        | Protein coding | 41 | GC10P086655 | 5.158004284 | <a href="https://www.genecards.org/cgi-bin/carddisp.pl?gene=OPN4">https://www.genecards.org/cgi-bin/carddisp.pl?gene=OPN4</a>         |
| LGALS3   | Galectin 3                                                                                     | Protein coding | 44 | GC14P055124 | 5.149111748 | <a href="https://www.genecards.org/cgi-bin/carddisp.pl?gene=LGALS3">https://www.genecards.org/cgi-bin/carddisp.pl?gene=LGALS3</a>     |
| NAMPT    | Nicotinamide Phosphoribosyltransferase                                                         | Protein coding | 47 | GC07M106248 | 5.14513588  | <a href="https://www.genecards.org/cgi-bin/carddisp.pl?gene=NAMPT">https://www.genecards.org/cgi-bin/carddisp.pl?gene=NAMPT</a>       |
| ITGB2    | Integrin Subunit $\beta$ 2                                                                     | Protein coding | 50 | GC21M044885 | 5.143673897 | <a href="https://www.genecards.org/cgi-bin/carddisp.pl?gene=ITGB2">https://www.genecards.org/cgi-bin/carddisp.pl?gene=ITGB2</a>       |
| MIR126   | MicroRNA 126                                                                                   | RNA gene       | 23 | GC09P136670 | 5.140875816 | <a href="https://www.genecards.org/cgi-bin/carddisp.pl?gene=MIR126">https://www.genecards.org/cgi-bin/carddisp.pl?gene=MIR126</a>     |
| NDUFS4   | NADH:Ubiquinone Oxidoreductase Subunit S4                                                      | Protein coding | 44 | GC05P053560 | 5.134493828 | <a href="https://www.genecards.org/cgi-bin/carddisp.pl?gene=NDUFS4">https://www.genecards.org/cgi-bin/carddisp.pl?gene=NDUFS4</a>     |
| PDGFRB   | Platelet Derived Growth Factor Receptor $\beta$                                                | Protein coding | 54 | GC05M150113 | 5.1233778   | <a href="https://www.genecards.org/cgi-bin/carddisp.pl?gene=PDGFRB">https://www.genecards.org/cgi-bin/carddisp.pl?gene=PDGFRB</a>     |
| FABP4    | Fatty Acid Binding Protein 4                                                                   | Protein coding | 44 | GC08M081478 | 5.122590065 | <a href="https://www.genecards.org/cgi-bin/carddisp.pl?gene=FABP4">https://www.genecards.org/cgi-bin/carddisp.pl?gene=FABP4</a>       |
| CASP2    | Caspase 2                                                                                      | Protein coding | 48 | GC07P146115 | 5.103130341 | <a href="https://www.genecards.org/cgi-bin/carddisp.pl?gene=CASP2">https://www.genecards.org/cgi-bin/carddisp.pl?gene=CASP2</a>       |
| CYP4A11  | Cytochrome P450 Family 4 Subfamily A Member 11                                                 | Protein coding | 43 | GC01M046929 | 5.101863384 | <a href="https://www.genecards.org/cgi-bin/carddisp.pl?gene=CYP4A11">https://www.genecards.org/cgi-bin/carddisp.pl?gene=CYP4A11</a>   |
| C5       | Complement C5                                                                                  | Protein coding | 46 | GC09M120952 | 5.076778889 | <a href="https://www.genecards.org/cgi-bin/carddisp.pl?gene=C5">https://www.genecards.org/cgi-bin/carddisp.pl?gene=C5</a>             |
| GJA4     | Gap Junction Protein $\alpha$ 4                                                                | Protein coding | 44 | GC01P034792 | 5.076355934 | <a href="https://www.genecards.org/cgi-bin/carddisp.pl?gene=GJA4">https://www.genecards.org/cgi-bin/carddisp.pl?gene=GJA4</a>         |
| SYNGAP1  | Synaptic Ras GTPase Activating Protein 1                                                       | Protein coding | 44 | GC06P033419 | 5.07335186  | <a href="https://www.genecards.org/cgi-bin/carddisp.pl?gene=SYNGAP1">https://www.genecards.org/cgi-bin/carddisp.pl?gene=SYNGAP1</a>   |
| MAPK1    | Mitogen-Activated Protein Kinase 1                                                             | Protein coding | 52 | GC22M021754 | 5.067660809 | <a href="https://www.genecards.org/cgi-bin/carddisp.pl?gene=MAPK1">https://www.genecards.org/cgi-bin/carddisp.pl?gene=MAPK1</a>       |
| MIF      | Macrophage Migration Inhibitory Factor                                                         | Protein coding | 49 | GC22P023894 | 5.055105209 | <a href="https://www.genecards.org/cgi-bin/carddisp.pl?gene=MIF">https://www.genecards.org/cgi-bin/carddisp.pl?gene=MIF</a>           |
| GARS1    | Glycyl-TRNA Synthetase 1                                                                       | Protein coding | 36 | GC07P030580 | 5.041885376 | <a href="https://www.genecards.org/cgi-bin/carddisp.pl?gene=GARS1">https://www.genecards.org/cgi-bin/carddisp.pl?gene=GARS1</a>       |
| TREM2    | Triggering Receptor Expressed On Myeloid Cells 2                                               | Protein coding | 42 | GC06M049313 | 5.041487217 | <a href="https://www.genecards.org/cgi-bin/carddisp.pl?gene=TREM2">https://www.genecards.org/cgi-bin/carddisp.pl?gene=TREM2</a>       |
| LIMK1    | LIM Domain Kinase 1                                                                            | Protein coding | 50 | GC07P074082 | 5.027829647 | <a href="https://www.genecards.org/cgi-bin/carddisp.pl?gene=LIMK1">https://www.genecards.org/cgi-bin/carddisp.pl?gene=LIMK1</a>       |
| STAT3    | Signal Transducer And Activator Of Transcription 3                                             | Protein coding | 52 | GC17M042313 | 5.017473221 | <a href="https://www.genecards.org/cgi-bin/carddisp.pl?gene=STAT3">https://www.genecards.org/cgi-bin/carddisp.pl?gene=STAT3</a>       |
| SELPLG   | Selectin P Ligand                                                                              | Protein coding | 42 | GC12M108621 | 5.004415512 | <a href="https://www.genecards.org/cgi-bin/carddisp.pl?gene=SELPLG">https://www.genecards.org/cgi-bin/carddisp.pl?gene=SELPLG</a>     |
| BCL2L1   | BCL2 Like 1                                                                                    | Protein coding | 47 | GC20M031664 | 4.987825394 | <a href="https://www.genecards.org/cgi-bin/carddisp.pl?gene=BCL2L1">https://www.genecards.org/cgi-bin/carddisp.pl?gene=BCL2L1</a>     |
| COL1A1   | Collagen Type 1 $\alpha$ 1 Chain                                                               | Protein coding | 50 | GC17M050183 | 4.985594749 | <a href="https://www.genecards.org/cgi-bin/carddisp.pl?gene=COL1A1">https://www.genecards.org/cgi-bin/carddisp.pl?gene=COL1A1</a>     |
| TGFBR3   | Transforming Growth Factor $\beta$ Receptor 3                                                  | Protein coding | 46 | GC01M091680 | 4.972678185 | <a href="https://www.genecards.org/cgi-bin/carddisp.pl?gene=TGFBR3">https://www.genecards.org/cgi-bin/carddisp.pl?gene=TGFBR3</a>     |
| MYH9     | Myosin Heavy Chain 9                                                                           | Protein coding | 50 | GC22M036281 | 4.969046593 | <a href="https://www.genecards.org/cgi-bin/carddisp.pl?gene=MYH9">https://www.genecards.org/cgi-bin/carddisp.pl?gene=MYH9</a>         |
| ITGAM    | Integrin Subunit $\alpha$ M                                                                    | Protein coding | 47 | GC16P033523 | 4.968577862 | <a href="https://www.genecards.org/cgi-bin/carddisp.pl?gene=ITGAM">https://www.genecards.org/cgi-bin/carddisp.pl?gene=ITGAM</a>       |
| ANGPT2   | Angiopietin 2                                                                                  | Protein coding | 45 | GC08M006499 | 4.954447746 | <a href="https://www.genecards.org/cgi-bin/carddisp.pl?gene=ANGPT2">https://www.genecards.org/cgi-bin/carddisp.pl?gene=ANGPT2</a>     |
| ELANE    | Elastase, Neutrophil Expressed                                                                 | Protein coding | 46 | GC19P000871 | 4.94735527  | <a href="https://www.genecards.org/cgi-bin/carddisp.pl?gene=ELANE">https://www.genecards.org/cgi-bin/carddisp.pl?gene=ELANE</a>       |
| CRELD1   | Cysteine Rich With EGF Like Domains 1                                                          | Protein coding | 40 | GC03P011101 | 4.94260931  | <a href="https://www.genecards.org/cgi-bin/carddisp.pl?gene=CRELD1">https://www.genecards.org/cgi-bin/carddisp.pl?gene=CRELD1</a>     |
| SORT1    | Sortilin 1                                                                                     | Protein coding | 43 | GC01M109310 | 4.93305397  | <a href="https://www.genecards.org/cgi-bin/carddisp.pl?gene=SORT1">https://www.genecards.org/cgi-bin/carddisp.pl?gene=SORT1</a>       |
| CYP2C8   | Cytochrome P450 Family 2 Subfamily C Member 8                                                  | Protein coding | 48 | GC10M095038 | 4.930232048 | <a href="https://www.genecards.org/cgi-bin/carddisp.pl?gene=CYP2C8">https://www.genecards.org/cgi-bin/carddisp.pl?gene=CYP2C8</a>     |
| SLC9A1   | Solute Carrier Family 9 Member A1                                                              | Protein coding | 51 | GC01M027109 | 4.919675827 | <a href="https://www.genecards.org/cgi-bin/carddisp.pl?gene=SLC9A1">https://www.genecards.org/cgi-bin/carddisp.pl?gene=SLC9A1</a>     |
| LCN2     | Lipocalin 2                                                                                    | Protein coding | 43 | GC09P128149 | 4.914496422 | <a href="https://www.genecards.org/cgi-bin/carddisp.pl?gene=LCN2">https://www.genecards.org/cgi-bin/carddisp.pl?gene=LCN2</a>         |
| CHAT     | Choline O-Acetyltransferase                                                                    | Protein coding | 47 | GC10P049609 | 4.912224293 | <a href="https://www.genecards.org/cgi-bin/carddisp.pl?gene=CHAT">https://www.genecards.org/cgi-bin/carddisp.pl?gene=CHAT</a>         |
| CAV1     | Caveolin 1                                                                                     | Protein coding | 48 | GC07P116524 | 4.896810532 | <a href="https://www.genecards.org/cgi-bin/carddisp.pl?gene=CAV1">https://www.genecards.org/cgi-bin/carddisp.pl?gene=CAV1</a>         |
| POMC     | Proopiomelanocortin                                                                            | Protein coding | 47 | GC02M025160 | 4.88965416  | <a href="https://www.genecards.org/cgi-bin/carddisp.pl?gene=POMC">https://www.genecards.org/cgi-bin/carddisp.pl?gene=POMC</a>         |
| ADA      | Adenosine Deaminase                                                                            | Protein coding | 51 | GC20M044620 | 4.881008148 | <a href="https://www.genecards.org/cgi-bin/carddisp.pl?gene=ADA">https://www.genecards.org/cgi-bin/carddisp.pl?gene=ADA</a>           |
| ABCC9    | ATP Binding Cassette Subfamily C Member 9                                                      | Protein coding | 45 | GC12M021797 | 4.880141258 | <a href="https://www.genecards.org/cgi-bin/carddisp.pl?gene=ABCC9">https://www.genecards.org/cgi-bin/carddisp.pl?gene=ABCC9</a>       |
| RYR1     | Ryanodine Receptor 1                                                                           | Protein coding | 47 | GC19P041518 | 4.862224579 | <a href="https://www.genecards.org/cgi-bin/carddisp.pl?gene=RYR1">https://www.genecards.org/cgi-bin/carddisp.pl?gene=RYR1</a>         |
| GATA3    | GATA Binding Protein 3                                                                         | Protein coding | 49 | GC10P008045 | 4.85787487  | <a href="https://www.genecards.org/cgi-bin/carddisp.pl?gene=GATA3">https://www.genecards.org/cgi-bin/carddisp.pl?gene=GATA3</a>       |
| RBP4     | Retinol Binding Protein 4                                                                      | Protein coding | 44 | GC10M093591 | 4.852359772 | <a href="https://www.genecards.org/cgi-bin/carddisp.pl?gene=RBP4">https://www.genecards.org/cgi-bin/carddisp.pl?gene=RBP4</a>         |
| KCNE2    | Potassium Voltage-Gated Channel Subfamily E Regulatory Subunit 2                               | Protein coding | 41 | GC21P034364 | 4.840103626 | <a href="https://www.genecards.org/cgi-bin/carddisp.pl?gene=KCNE2">https://www.genecards.org/cgi-bin/carddisp.pl?gene=KCNE2</a>       |
| COG2     | Component Of Oligomeric Golgi Complex 2                                                        | Protein coding | 41 | GC01P230642 | 4.83080864  | <a href="https://www.genecards.org/cgi-bin/carddisp.pl?gene=COG2">https://www.genecards.org/cgi-bin/carddisp.pl?gene=COG2</a>         |
| H19      | H19 Imprinted Maternally Expressed Transcript                                                  | RNA gene       | 28 | GC11M001995 | 4.826947212 | <a href="https://www.genecards.org/cgi-bin/carddisp.pl?gene=H19">https://www.genecards.org/cgi-bin/carddisp.pl?gene=H19</a>           |
| ACTG1    | Actin $\gamma$ 1                                                                               | Protein coding | 50 | GC17M081509 | 4.812610626 | <a href="https://www.genecards.org/cgi-bin/carddisp.pl?gene=ACTG1">https://www.genecards.org/cgi-bin/carddisp.pl?gene=ACTG1</a>       |
| ADRB3    | Adrenoceptor $\beta$ 3                                                                         | Protein coding | 45 | GC08M037962 | 4.789031029 | <a href="https://www.genecards.org/cgi-bin/carddisp.pl?gene=ADRB3">https://www.genecards.org/cgi-bin/carddisp.pl?gene=ADRB3</a>       |
| TARDBP   | TAR DNA Binding Protein                                                                        | Protein coding | 46 | GC01P011013 | 4.766427517 | <a href="https://www.genecards.org/cgi-bin/carddisp.pl?gene=TARDBP">https://www.genecards.org/cgi-bin/carddisp.pl?gene=TARDBP</a>     |
| TNFSF4   | TNF Superfamily Member 4                                                                       | Protein coding | 40 | GC01M173183 | 4.76218605  | <a href="https://www.genecards.org/cgi-bin/carddisp.pl?gene=TNFSF4">https://www.genecards.org/cgi-bin/carddisp.pl?gene=TNFSF4</a>     |
| COX5B    | Cytochrome C Oxidase Subunit 5B                                                                | Protein coding | 41 | GC02P097628 | 4.758938313 | <a href="https://www.genecards.org/cgi-bin/carddisp.pl?gene=COX5B">https://www.genecards.org/cgi-bin/carddisp.pl?gene=COX5B</a>       |
| PTH      | Parathyroid Hormone                                                                            | Protein coding | 45 | GC11M013492 | 4.756153107 | <a href="https://www.genecards.org/cgi-bin/carddisp.pl?gene=PTH">https://www.genecards.org/cgi-bin/carddisp.pl?gene=PTH</a>           |
| AHSG     | $\alpha$ 2-HS Glycoprotein                                                                     | Protein coding | 43 | GC03P186612 | 4.753621101 | <a href="https://www.genecards.org/cgi-bin/carddisp.pl?gene=AHSG">https://www.genecards.org/cgi-bin/carddisp.pl?gene=AHSG</a>         |
| SNCA     | Synuclein $\alpha$                                                                             | Protein coding | 49 | GC04M089724 | 4.75213623  | <a href="https://www.genecards.org/cgi-bin/carddisp.pl?gene=SNCA">https://www.genecards.org/cgi-bin/carddisp.pl?gene=SNCA</a>         |
| SLC2A1   | Solute Carrier Family 2 Member 1                                                               | Protein coding | 52 | GC01M042925 | 4.750926971 | <a href="https://www.genecards.org/cgi-bin/carddisp.pl?gene=SLC2A1">https://www.genecards.org/cgi-bin/carddisp.pl?gene=SLC2A1</a>     |
| MFN2     | Mitofusin 2                                                                                    | Protein coding | 48 | GC01P011980 | 4.736171246 | <a href="https://www.genecards.org/cgi-bin/carddisp.pl?gene=MFN2">https://www.genecards.org/cgi-bin/carddisp.pl?gene=MFN2</a>         |
| SCN2A    | Sodium Voltage-Gated Channel $\alpha$ Subunit 2                                                | Protein coding | 47 | GC02P165194 | 4.701293945 | <a href="https://www.genecards.org/cgi-bin/carddisp.pl?gene=SCN2A">https://www.genecards.org/cgi-bin/carddisp.pl?gene=SCN2A</a>       |
| CLCN1    | Chloride Voltage-Gated Channel 1                                                               | Protein coding | 44 | GC07P143316 | 4.701293945 | <a href="https://www.genecards.org/cgi-bin/carddisp.pl?gene=CLCN1">https://www.genecards.org/cgi-bin/carddisp.pl?gene=CLCN1</a>       |
| DNAH8    | Dynein Axonemal Heavy Chain 8                                                                  | Protein coding | 38 | GC06P058478 | 4.701005936 | <a href="https://www.genecards.org/cgi-bin/carddisp.pl?gene=DNAH8">https://www.genecards.org/cgi-bin/carddisp.pl?gene=DNAH8</a>       |
| IRS1     | Insulin Receptor Substrate 1                                                                   | Protein coding | 47 | GC02M226731 | 4.697993755 | <a href="https://www.genecards.org/cgi-bin/carddisp.pl?gene=IRS1">https://www.genecards.org/cgi-bin/carddisp.pl?gene=IRS1</a>         |
| ANGPTL6  | Angiopietin Like 6                                                                             | Protein coding | 38 | GC19M010092 | 4.697779655 | <a href="https://www.genecards.org/cgi-bin/carddisp.pl?gene=ANGPTL6">https://www.genecards.org/cgi-bin/carddisp.pl?gene=ANGPTL6</a>   |
| MTERF1   | Mitochondrial Transcription Termination Factor 1                                               | Protein coding | 34 | GC07M091692 | 4.692548275 | <a href="https://www.genecards.org/cgi-bin/carddisp.pl?gene=MTERF1">https://www.genecards.org/cgi-bin/carddisp.pl?gene=MTERF1</a>     |
| ITGB1    | Integrin Subunit $\beta$ 1                                                                     | Protein coding | 50 | GC10M032892 | 4.67652607  | <a href="https://www.genecards.org/cgi-bin/carddisp.pl?gene=ITGB1">https://www.genecards.org/cgi-bin/carddisp.pl?gene=ITGB1</a>       |
| PHACTR1  | Phosphatase And Actin Regulator 1                                                              | Protein coding | 37 | GC06P012717 | 4.671995163 | <a href="https://www.genecards.org/cgi-bin/carddisp.pl?gene=PHACTR1">https://www.genecards.org/cgi-bin/carddisp.pl?gene=PHACTR1</a>   |

|              |                                                                                 |                   |    |             |             |                                                                                                                                               |
|--------------|---------------------------------------------------------------------------------|-------------------|----|-------------|-------------|-----------------------------------------------------------------------------------------------------------------------------------------------|
| CTNNB1       | Catenin $\beta$ 1                                                               | Protein coding    | 53 | GC03P041236 | 4.663755417 | <a href="https://www.genecards.org/cgi-bin/carddisp.pl?gene=CTNNB1">https://www.genecards.org/cgi-bin/carddisp.pl?gene=CTNNB1</a>             |
| FABP2        | Fatty Acid Binding Protein 2                                                    | Protein coding    | 42 | GC04M119317 | 4.661312103 | <a href="https://www.genecards.org/cgi-bin/carddisp.pl?gene=FABP2">https://www.genecards.org/cgi-bin/carddisp.pl?gene=FABP2</a>               |
| ASS1         | Argininosuccinate Synthase 1                                                    | Protein coding    | 48 | GC09P130444 | 4.654839993 | <a href="https://www.genecards.org/cgi-bin/carddisp.pl?gene=ASS1">https://www.genecards.org/cgi-bin/carddisp.pl?gene=ASS1</a>                 |
| EGF          | Epidermal Growth Factor                                                         | Protein coding    | 50 | GC04P109912 | 4.654715538 | <a href="https://www.genecards.org/cgi-bin/carddisp.pl?gene=EGF">https://www.genecards.org/cgi-bin/carddisp.pl?gene=EGF</a>                   |
| ARSA         | Arylsulfatase A                                                                 | Protein coding    | 46 | GC22M050622 | 4.65216732  | <a href="https://www.genecards.org/cgi-bin/carddisp.pl?gene=ARSA">https://www.genecards.org/cgi-bin/carddisp.pl?gene=ARSA</a>                 |
| FGF21        | Fibroblast Growth Factor 21                                                     | Protein coding    | 39 | GC19P048784 | 4.645974159 | <a href="https://www.genecards.org/cgi-bin/carddisp.pl?gene=FGF21">https://www.genecards.org/cgi-bin/carddisp.pl?gene=FGF21</a>               |
| MIR210       | MicroRNA 210                                                                    | RNA gene          | 22 | GC11M001307 | 4.621683121 | <a href="https://www.genecards.org/cgi-bin/carddisp.pl?gene=MIR210">https://www.genecards.org/cgi-bin/carddisp.pl?gene=MIR210</a>             |
| FLNC-AS1     | FLNC Antisense RNA 1                                                            | RNA gene          | 11 | GC07M128851 | 4.620165348 | <a href="https://www.genecards.org/cgi-bin/carddisp.pl?gene=FLNC-AS1">https://www.genecards.org/cgi-bin/carddisp.pl?gene=FLNC-AS1</a>         |
| MC4R         | Melanocortin 4 Receptor                                                         | Protein coding    | 46 | GC18M060371 | 4.601145744 | <a href="https://www.genecards.org/cgi-bin/carddisp.pl?gene=MC4R">https://www.genecards.org/cgi-bin/carddisp.pl?gene=MC4R</a>                 |
| VCP          | Valosin Containing Protein                                                      | Protein coding    | 49 | GC09M035056 | 4.601136208 | <a href="https://www.genecards.org/cgi-bin/carddisp.pl?gene=VCP">https://www.genecards.org/cgi-bin/carddisp.pl?gene=VCP</a>                   |
| IFNG         | Interferon $\gamma$                                                             | Protein coding    | 47 | GC12M068154 | 4.5866642   | <a href="https://www.genecards.org/cgi-bin/carddisp.pl?gene=IFNG">https://www.genecards.org/cgi-bin/carddisp.pl?gene=IFNG</a>                 |
| MYD88        | MYD88 Innate Immune Signal Transduction Adaptor                                 | Protein coding    | 48 | GC03P038139 | 4.584213257 | <a href="https://www.genecards.org/cgi-bin/carddisp.pl?gene=MYD88">https://www.genecards.org/cgi-bin/carddisp.pl?gene=MYD88</a>               |
| KCNA5        | Potassium Voltage-Gated Channel Subfamily A Member 5                            | Protein coding    | 45 | GC12P005043 | 4.583177567 | <a href="https://www.genecards.org/cgi-bin/carddisp.pl?gene=KCNA5">https://www.genecards.org/cgi-bin/carddisp.pl?gene=KCNA5</a>               |
| SLC1A3       | Solute Carrier Family 1 Member 3                                                | Protein coding    | 51 | GC05P036623 | 4.582777023 | <a href="https://www.genecards.org/cgi-bin/carddisp.pl?gene=SLC1A3">https://www.genecards.org/cgi-bin/carddisp.pl?gene=SLC1A3</a>             |
| NOTCH2       | Notch Receptor 2                                                                | Protein coding    | 50 | GC01M119911 | 4.58099699  | <a href="https://www.genecards.org/cgi-bin/carddisp.pl?gene=NOTCH2">https://www.genecards.org/cgi-bin/carddisp.pl?gene=NOTCH2</a>             |
| PCCA         | Propionyl-CoA Carboxylase Subunit $\alpha$                                      | Protein coding    | 47 | GC13P100089 | 4.574438095 | <a href="https://www.genecards.org/cgi-bin/carddisp.pl?gene=PCCA">https://www.genecards.org/cgi-bin/carddisp.pl?gene=PCCA</a>                 |
| PTPN22       | Protein Tyrosine Phosphatase Non-Receptor Type 22                               | Protein coding    | 47 | GC01M113813 | 4.56750679  | <a href="https://www.genecards.org/cgi-bin/carddisp.pl?gene=PTPN22">https://www.genecards.org/cgi-bin/carddisp.pl?gene=PTPN22</a>             |
| IRF5         | Interferon Regulatory Factor 5                                                  | Protein coding    | 47 | GC07P128937 | 4.551713943 | <a href="https://www.genecards.org/cgi-bin/carddisp.pl?gene=IRF5">https://www.genecards.org/cgi-bin/carddisp.pl?gene=IRF5</a>                 |
| BMP2         | Bone Morphogenetic Protein 2                                                    | Protein coding    | 46 | GC20P006696 | 4.540714264 | <a href="https://www.genecards.org/cgi-bin/carddisp.pl?gene=BMP2">https://www.genecards.org/cgi-bin/carddisp.pl?gene=BMP2</a>                 |
| SCN1A        | Sodium Voltage-Gated Channel $\alpha$ Subunit 1                                 | Protein coding    | 47 | GC02M165989 | 4.538622856 | <a href="https://www.genecards.org/cgi-bin/carddisp.pl?gene=SCN1A">https://www.genecards.org/cgi-bin/carddisp.pl?gene=SCN1A</a>               |
| FN1          | Fibronectin 1                                                                   | Protein coding    | 50 | GC02M215360 | 4.532525539 | <a href="https://www.genecards.org/cgi-bin/carddisp.pl?gene=FN1">https://www.genecards.org/cgi-bin/carddisp.pl?gene=FN1</a>                   |
| CCR6         | C-C Motif Chemokine Receptor 6                                                  | Protein coding    | 45 | GC06P167111 | 4.531476498 | <a href="https://www.genecards.org/cgi-bin/carddisp.pl?gene=CCR6">https://www.genecards.org/cgi-bin/carddisp.pl?gene=CCR6</a>                 |
| XIAP         | X-Linked Inhibitor Of Apoptosis                                                 | Protein coding    | 49 | GC0XP123859 | 4.530772686 | <a href="https://www.genecards.org/cgi-bin/carddisp.pl?gene=XIAP">https://www.genecards.org/cgi-bin/carddisp.pl?gene=XIAP</a>                 |
| EPRS1        | Glutamyl-Prolyl-TRNA Synthetase 1                                               | Protein coding    | 36 | GC01M219969 | 4.525707245 | <a href="https://www.genecards.org/cgi-bin/carddisp.pl?gene=EPRS1">https://www.genecards.org/cgi-bin/carddisp.pl?gene=EPRS1</a>               |
| ARRDC4       | Arrestin Domain Containing 4                                                    | Protein coding    | 34 | GC15P097960 | 4.514660358 | <a href="https://www.genecards.org/cgi-bin/carddisp.pl?gene=ARRDC4">https://www.genecards.org/cgi-bin/carddisp.pl?gene=ARRDC4</a>             |
| COMT         | Catechol-O-Methyltransferase                                                    | Protein coding    | 51 | GC22P019941 | 4.513561726 | <a href="https://www.genecards.org/cgi-bin/carddisp.pl?gene=COMT">https://www.genecards.org/cgi-bin/carddisp.pl?gene=COMT</a>                 |
| BMP6         | Bone Morphogenetic Protein 6                                                    | Protein coding    | 43 | GC06P007726 | 4.509186745 | <a href="https://www.genecards.org/cgi-bin/carddisp.pl?gene=BMP6">https://www.genecards.org/cgi-bin/carddisp.pl?gene=BMP6</a>                 |
| GDF2         | Growth Differentiation Factor 2                                                 | Protein coding    | 42 | GC10P047322 | 4.507152557 | <a href="https://www.genecards.org/cgi-bin/carddisp.pl?gene=GDF2">https://www.genecards.org/cgi-bin/carddisp.pl?gene=GDF2</a>                 |
| TPM1         | Tropomyosin 1                                                                   | Protein coding    | 50 | GC15P080570 | 4.504650593 | <a href="https://www.genecards.org/cgi-bin/carddisp.pl?gene=TPM1">https://www.genecards.org/cgi-bin/carddisp.pl?gene=TPM1</a>                 |
| CD163        | CD163 Molecule                                                                  | Protein coding    | 41 | GC12M007471 | 4.501879692 | <a href="https://www.genecards.org/cgi-bin/carddisp.pl?gene=CD163">https://www.genecards.org/cgi-bin/carddisp.pl?gene=CD163</a>               |
| FMR1         | FMRP Translational Regulator 1                                                  | Protein coding    | 44 | GC0XP147928 | 4.497466564 | <a href="https://www.genecards.org/cgi-bin/carddisp.pl?gene=FMR1">https://www.genecards.org/cgi-bin/carddisp.pl?gene=FMR1</a>                 |
| ARG1         | Arginase 1                                                                      | Protein coding    | 49 | GC06P131473 | 4.484262466 | <a href="https://www.genecards.org/cgi-bin/carddisp.pl?gene=ARG1">https://www.genecards.org/cgi-bin/carddisp.pl?gene=ARG1</a>                 |
| F13B         | Coagulation Factor XIII B Chain                                                 | Protein coding    | 41 | GC01M197008 | 4.471457958 | <a href="https://www.genecards.org/cgi-bin/carddisp.pl?gene=F13B">https://www.genecards.org/cgi-bin/carddisp.pl?gene=F13B</a>                 |
| TSPAN2       | Tetraspanin 2                                                                   | Protein coding    | 37 | GC01M115050 | 4.469252586 | <a href="https://www.genecards.org/cgi-bin/carddisp.pl?gene=TSPAN2">https://www.genecards.org/cgi-bin/carddisp.pl?gene=TSPAN2</a>             |
| WDR26        | WD Repeat Domain 26                                                             | Protein coding    | 40 | GC01M224385 | 4.458930016 | <a href="https://www.genecards.org/cgi-bin/carddisp.pl?gene=WDR26">https://www.genecards.org/cgi-bin/carddisp.pl?gene=WDR26</a>               |
| YY1AP1       | YY1 Associated Protein 1                                                        | Protein coding    | 39 | GC01M155659 | 4.445444107 | <a href="https://www.genecards.org/cgi-bin/carddisp.pl?gene=YY1AP1">https://www.genecards.org/cgi-bin/carddisp.pl?gene=YY1AP1</a>             |
| ASTN2        | Astroactin 2                                                                    | Protein coding    | 36 | GC09M116425 | 4.438468456 | <a href="https://www.genecards.org/cgi-bin/carddisp.pl?gene=ASTN2">https://www.genecards.org/cgi-bin/carddisp.pl?gene=ASTN2</a>               |
| LOC110806262 | Solute Carrier Family 6 Member 4 Gene Promoter                                  | Biological region | 1  | GC17P030235 | 4.43233633  | <a href="https://www.genecards.org/cgi-bin/carddisp.pl?gene=LOC110806262">https://www.genecards.org/cgi-bin/carddisp.pl?gene=LOC110806262</a> |
| B2M          | $\beta$ -2-Microglobulin                                                        | Protein coding    | 48 | GC15P044711 | 4.431304932 | <a href="https://www.genecards.org/cgi-bin/carddisp.pl?gene=B2M">https://www.genecards.org/cgi-bin/carddisp.pl?gene=B2M</a>                   |
| CORIN        | Corin, Serine Peptidase                                                         | Protein coding    | 44 | GC04M047596 | 4.430745602 | <a href="https://www.genecards.org/cgi-bin/carddisp.pl?gene=CORIN">https://www.genecards.org/cgi-bin/carddisp.pl?gene=CORIN</a>               |
| KMO          | Kynurenine 3-Monooxygenase                                                      | Protein coding    | 44 | GC01P241532 | 4.425868511 | <a href="https://www.genecards.org/cgi-bin/carddisp.pl?gene=KMO">https://www.genecards.org/cgi-bin/carddisp.pl?gene=KMO</a>                   |
| HTR3A        | 5-Hydroxytryptamine Receptor 3A                                                 | Protein coding    | 46 | GC11P113974 | 4.425365925 | <a href="https://www.genecards.org/cgi-bin/carddisp.pl?gene=HTR3A">https://www.genecards.org/cgi-bin/carddisp.pl?gene=HTR3A</a>               |
| SAMHD1       | SAM And HD Domain Containing Deoxynucleoside Triphosphate Triphosphohydrolase 1 | Protein coding    | 43 | GC20M036890 | 4.417947769 | <a href="https://www.genecards.org/cgi-bin/carddisp.pl?gene=SAMHD1">https://www.genecards.org/cgi-bin/carddisp.pl?gene=SAMHD1</a>             |
| PGF          | Placental Growth Factor                                                         | Protein coding    | 43 | GC14M074941 | 4.407823563 | <a href="https://www.genecards.org/cgi-bin/carddisp.pl?gene=PGF">https://www.genecards.org/cgi-bin/carddisp.pl?gene=PGF</a>                   |
| MGR5         | Migraine With Or Without Aura, Susceptibility To, 5                             | Genetic locus     | 1  | GC19U900053 | 4.405620575 | <a href="https://www.genecards.org/cgi-bin/carddisp.pl?gene=MGR5">https://www.genecards.org/cgi-bin/carddisp.pl?gene=MGR5</a>                 |
| MGR6         | Migraine, Several Forms                                                         | Genetic locus     | 1  | GC01U904111 | 4.405620575 | <a href="https://www.genecards.org/cgi-bin/carddisp.pl?gene=MGR6">https://www.genecards.org/cgi-bin/carddisp.pl?gene=MGR6</a>                 |
| GH1          | Growth Hormone 1                                                                | Protein coding    | 44 | GC17M063917 | 4.404236794 | <a href="https://www.genecards.org/cgi-bin/carddisp.pl?gene=GH1">https://www.genecards.org/cgi-bin/carddisp.pl?gene=GH1</a>                   |
| KALRN        | Kalirin RhoGEF Kinase                                                           | Protein coding    | 43 | GC03P124033 | 4.403354645 | <a href="https://www.genecards.org/cgi-bin/carddisp.pl?gene=KALRN">https://www.genecards.org/cgi-bin/carddisp.pl?gene=KALRN</a>               |
| NRP1         | Neuropilin 1                                                                    | Protein coding    | 46 | GC10M033177 | 4.38891077  | <a href="https://www.genecards.org/cgi-bin/carddisp.pl?gene=NRP1">https://www.genecards.org/cgi-bin/carddisp.pl?gene=NRP1</a>                 |
| ODC1         | Ornithine Decarboxylase 1                                                       | Protein coding    | 48 | GC02M010432 | 4.385074615 | <a href="https://www.genecards.org/cgi-bin/carddisp.pl?gene=ODC1">https://www.genecards.org/cgi-bin/carddisp.pl?gene=ODC1</a>                 |
| SST          | Somatostatin                                                                    | Protein coding    | 42 | GC03M187668 | 4.37627697  | <a href="https://www.genecards.org/cgi-bin/carddisp.pl?gene=SST">https://www.genecards.org/cgi-bin/carddisp.pl?gene=SST</a>                   |
| NR2F2        | Nuclear Receptor Subfamily 2 Group F Member 2                                   | Protein coding    | 49 | GC15P096325 | 4.375780106 | <a href="https://www.genecards.org/cgi-bin/carddisp.pl?gene=NR2F2">https://www.genecards.org/cgi-bin/carddisp.pl?gene=NR2F2</a>               |
| CLU          | Clusterin                                                                       | Protein coding    | 45 | GC08M027596 | 4.374174118 | <a href="https://www.genecards.org/cgi-bin/carddisp.pl?gene=CLU">https://www.genecards.org/cgi-bin/carddisp.pl?gene=CLU</a>                   |
| ASIC1        | Acid Sensing Ion Channel Subunit 1                                              | Protein coding    | 43 | GC12P050057 | 4.366595268 | <a href="https://www.genecards.org/cgi-bin/carddisp.pl?gene=ASIC1">https://www.genecards.org/cgi-bin/carddisp.pl?gene=ASIC1</a>               |
| THSD1        | Thrombospondin Type 1 Domain Containing 1                                       | Protein coding    | 39 | GC13M052377 | 4.36397934  | <a href="https://www.genecards.org/cgi-bin/carddisp.pl?gene=THSD1">https://www.genecards.org/cgi-bin/carddisp.pl?gene=THSD1</a>               |
| SRC          | SRC Proto-Oncogene, Non-Receptor Tyrosine Kinase                                | Protein coding    | 51 | GC20P037344 | 4.362557411 | <a href="https://www.genecards.org/cgi-bin/carddisp.pl?gene=SRC">https://www.genecards.org/cgi-bin/carddisp.pl?gene=SRC</a>                   |
| SETD2        | SET Domain Containing 2, Histone Lysine Methyltransferase                       | Protein coding    | 47 | GC03M047033 | 4.359635353 | <a href="https://www.genecards.org/cgi-bin/carddisp.pl?gene=SETD2">https://www.genecards.org/cgi-bin/carddisp.pl?gene=SETD2</a>               |
| FCGR3B       | Fc Fragment Of IgG Receptor IIIb                                                | Protein coding    | 42 | GC01M161623 | 4.346986771 | <a href="https://www.genecards.org/cgi-bin/carddisp.pl?gene=FCGR3B">https://www.genecards.org/cgi-bin/carddisp.pl?gene=FCGR3B</a>             |
| MMP8         | Matrix Metallopeptidase 8                                                       | Protein coding    | 48 | GC11M102617 | 4.332929611 | <a href="https://www.genecards.org/cgi-bin/carddisp.pl?gene=MMP8">https://www.genecards.org/cgi-bin/carddisp.pl?gene=MMP8</a>                 |
| SPG7         | SPG7 Matrix AAA Peptidase Subunit, Paraplegin                                   | Protein coding    | 43 | GC16P089879 | 4.332630634 | <a href="https://www.genecards.org/cgi-bin/carddisp.pl?gene=SPG7">https://www.genecards.org/cgi-bin/carddisp.pl?gene=SPG7</a>                 |
| TFAM         | Transcription Factor A, Mitochondrial                                           | Protein coding    | 44 | GC10P058385 | 4.331443787 | <a href="https://www.genecards.org/cgi-bin/carddisp.pl?gene=TFAM">https://www.genecards.org/cgi-bin/carddisp.pl?gene=TFAM</a>                 |
| CYP3A4       | Cytochrome P450 Family 3 Subfamily A Member 4                                   | Protein coding    | 51 | GC07M099759 | 4.321602345 | <a href="https://www.genecards.org/cgi-bin/carddisp.pl?gene=CYP3A4">https://www.genecards.org/cgi-bin/carddisp.pl?gene=CYP3A4</a>             |
| GRIA1        | Glutamate Ionotropic Receptor AMPA Type Subunit 1                               | Protein coding    | 49 | GC05P153467 | 4.319773674 | <a href="https://www.genecards.org/cgi-bin/carddisp.pl?gene=GRIA1">https://www.genecards.org/cgi-bin/carddisp.pl?gene=GRIA1</a>               |
| SDHB         | Succinate Dehydrogenase Complex Iron Sulfur Subunit B                           | Protein coding    | 48 | GC01M017338 | 4.311541557 | <a href="https://www.genecards.org/cgi-bin/carddisp.pl?gene=SDHB">https://www.genecards.org/cgi-bin/carddisp.pl?gene=SDHB</a>                 |
| MIR143       | MicroRNA 143                                                                    | RNA gene          | 23 | GC05P149410 | 4.29777956  | <a href="https://www.genecards.org/cgi-bin/carddisp.pl?gene=MIR143">https://www.genecards.org/cgi-bin/carddisp.pl?gene=MIR143</a>             |
| LIPA         | Lipase A, Lysosomal Acid Type                                                   | Protein coding    | 48 | GC10M089213 | 4.295601845 | <a href="https://www.genecards.org/cgi-bin/carddisp.pl?gene=LIPA">https://www.genecards.org/cgi-bin/carddisp.pl?gene=LIPA</a>                 |
| PARK7        | Parkinsonism Associated Deglycase                                               | Protein coding    | 45 | GC01P008025 | 4.289067268 | <a href="https://www.genecards.org/cgi-bin/carddisp.pl?gene=PARK7">https://www.genecards.org/cgi-bin/carddisp.pl?gene=PARK7</a>               |
| CPT2         | Carnitine Palmitoyltransferase 2                                                | Protein coding    | 49 | GC01P053196 | 4.287819862 | <a href="https://www.genecards.org/cgi-bin/carddisp.pl?gene=CPT2">https://www.genecards.org/cgi-bin/carddisp.pl?gene=CPT2</a>                 |
| HTR1A        | 5-Hydroxytryptamine Receptor 1A                                                 | Protein coding    | 47 | GC05M063960 | 4.283052444 | <a href="https://www.genecards.org/cgi-bin/carddisp.pl?gene=HTR1A">https://www.genecards.org/cgi-bin/carddisp.pl?gene=HTR1A</a>               |
| CD63         | CD63 Molecule                                                                   | Protein coding    | 42 | GC12M055725 | 4.273869514 | <a href="https://www.genecards.org/cgi-bin/carddisp.pl?gene=CD63">https://www.genecards.org/cgi-bin/carddisp.pl?gene=CD63</a>                 |
| GRIN1        | Glutamate Ionotropic Receptor NMDA Type Subunit 1                               | Protein coding    | 50 | GC09P137138 | 4.2697649   | <a href="https://www.genecards.org/cgi-bin/carddisp.pl?gene=GRIN1">https://www.genecards.org/cgi-bin/carddisp.pl?gene=GRIN1</a>               |
| CNR1         | Cannabinoid Receptor 1                                                          | Protein coding    | 47 | GC06M088139 | 4.269175053 | <a href="https://www.genecards.org/cgi-bin/carddisp.pl?gene=CNR1">https://www.genecards.org/cgi-bin/carddisp.pl?gene=CNR1</a>                 |
| CHI3L1       | Chitinase 3 Like 1                                                              | Protein coding    | 43 | GC01M203148 | 4.253834724 | <a href="https://www.genecards.org/cgi-bin/carddisp.pl?gene=CHI3L1">https://www.genecards.org/cgi-bin/carddisp.pl?gene=CHI3L1</a>             |
| TEK          | TEK Receptor Tyrosine Kinase                                                    | Protein coding    | 50 | GC09P027109 | 4.231464386 | <a href="https://www.genecards.org/cgi-bin/carddisp.pl?gene=TEK">https://www.genecards.org/cgi-bin/carddisp.pl?gene=TEK</a>                   |
| DRD1         | Dopamine Receptor D1                                                            | Protein coding    | 45 | GC05M175440 | 4.227813721 | <a href="https://www.genecards.org/cgi-bin/carddisp.pl?gene=DRD1">https://www.genecards.org/cgi-bin/carddisp.pl?gene=DRD1</a>                 |
| CHIT1        | Chitinase 1                                                                     | Protein coding    | 43 | GC01M203181 | 4.223034382 | <a href="https://www.genecards.org/cgi-bin/carddisp.pl?gene=CHIT1">https://www.genecards.org/cgi-bin/carddisp.pl?gene=CHIT1</a>               |

|              |                                                                        |                   |    |             |             |                                                                                                                                               |
|--------------|------------------------------------------------------------------------|-------------------|----|-------------|-------------|-----------------------------------------------------------------------------------------------------------------------------------------------|
| UQCDFS1      | Ubiquinol-Cytochrome C Reductase, Rieske Iron-Sulfur Polypeptide 1     | Protein coding    | 45 | GC19M029205 | 4.220843315 | <a href="https://www.genecards.org/cgi-bin/carddisp.pl?gene=UQCDFS1">https://www.genecards.org/cgi-bin/carddisp.pl?gene=UQCDFS1</a>           |
| IL5RA        | Interleukin 5 Receptor Subunit $\alpha$                                | Protein coding    | 45 | GC03M003066 | 4.219671249 | <a href="https://www.genecards.org/cgi-bin/carddisp.pl?gene=IL5RA">https://www.genecards.org/cgi-bin/carddisp.pl?gene=IL5RA</a>               |
| LEPR         | Leptin Receptor                                                        | Protein coding    | 49 | GC01P065421 | 4.208309174 | <a href="https://www.genecards.org/cgi-bin/carddisp.pl?gene=LEPR">https://www.genecards.org/cgi-bin/carddisp.pl?gene=LEPR</a>                 |
| MT-ND3       | Mitochondrially Encoded NADH:Ubiquinone Oxidoreductase Core Subunit 3  | Protein coding    | 33 | GCMTP010061 | 4.207285404 | <a href="https://www.genecards.org/cgi-bin/carddisp.pl?gene=MT-ND3">https://www.genecards.org/cgi-bin/carddisp.pl?gene=MT-ND3</a>             |
| FURIN        | Furin, Paired Basic Amino Acid Cleaving Enzyme                         | Protein coding    | 45 | GC15P090868 | 4.204946041 | <a href="https://www.genecards.org/cgi-bin/carddisp.pl?gene=FURIN">https://www.genecards.org/cgi-bin/carddisp.pl?gene=FURIN</a>               |
| NR3C2        | Nuclear Receptor Subfamily 3 Group C Member 2                          | Protein coding    | 48 | GC04M148078 | 4.201635838 | <a href="https://www.genecards.org/cgi-bin/carddisp.pl?gene=NR3C2">https://www.genecards.org/cgi-bin/carddisp.pl?gene=NR3C2</a>               |
| CRYAB        | Crystallin $\alpha$ B                                                  | Protein coding    | 44 | GC11M111908 | 4.189797401 | <a href="https://www.genecards.org/cgi-bin/carddisp.pl?gene=CRYAB">https://www.genecards.org/cgi-bin/carddisp.pl?gene=CRYAB</a>               |
| FGF23        | Fibroblast Growth Factor 23                                            | Protein coding    | 45 | GC12M004368 | 4.182587624 | <a href="https://www.genecards.org/cgi-bin/carddisp.pl?gene=FGF23">https://www.genecards.org/cgi-bin/carddisp.pl?gene=FGF23</a>               |
| MGR2         | Migraine, Familial Typical, Susceptibility To                          | Genetic locus     | 1  | GC0XU900032 | 4.17092514  | <a href="https://www.genecards.org/cgi-bin/carddisp.pl?gene=MGR2">https://www.genecards.org/cgi-bin/carddisp.pl?gene=MGR2</a>                 |
| MGR3         | Migraine, Familial, With Or Without Aura, Susceptibility To            | Genetic locus     | 1  | GC06U900014 | 4.17092514  | <a href="https://www.genecards.org/cgi-bin/carddisp.pl?gene=MGR3">https://www.genecards.org/cgi-bin/carddisp.pl?gene=MGR3</a>                 |
| MGR8         | Migraine, Susceptibility To, 8                                         | Genetic locus     | 1  | GC05U901104 | 4.17092514  | <a href="https://www.genecards.org/cgi-bin/carddisp.pl?gene=MGR8">https://www.genecards.org/cgi-bin/carddisp.pl?gene=MGR8</a>                 |
| MGR1         | Migraine With Aura, Susceptibility To                                  | Genetic locus     | 1  | GC04U901855 | 4.17092514  | <a href="https://www.genecards.org/cgi-bin/carddisp.pl?gene=MGR1">https://www.genecards.org/cgi-bin/carddisp.pl?gene=MGR1</a>                 |
| MGR10        | Migraine With Or Without Aura, Susceptibility To, 10                   | Genetic locus     | 1  | GC17U902914 | 4.17092514  | <a href="https://www.genecards.org/cgi-bin/carddisp.pl?gene=MGR10">https://www.genecards.org/cgi-bin/carddisp.pl?gene=MGR10</a>               |
| MGR11        | Migraine With Or Without Aura, Susceptibility To, 11                   | Genetic locus     | 1  | GC18U901349 | 4.17092514  | <a href="https://www.genecards.org/cgi-bin/carddisp.pl?gene=MGR11">https://www.genecards.org/cgi-bin/carddisp.pl?gene=MGR11</a>               |
| MGR12        | Migraine, With Or Without Aura, Susceptibility To, 12                  | Genetic locus     | 1  | GC10U901155 | 4.17092514  | <a href="https://www.genecards.org/cgi-bin/carddisp.pl?gene=MGR12">https://www.genecards.org/cgi-bin/carddisp.pl?gene=MGR12</a>               |
| ALG13        | ALG13 UDP-N-Acetylglucosaminyltransferase Subunit                      | Protein coding    | 38 | GC0XP111665 | 4.165397644 | <a href="https://www.genecards.org/cgi-bin/carddisp.pl?gene=ALG13">https://www.genecards.org/cgi-bin/carddisp.pl?gene=ALG13</a>               |
| NTS          | Neurotensin                                                            | Protein coding    | 40 | GC12P085876 | 4.160854816 | <a href="https://www.genecards.org/cgi-bin/carddisp.pl?gene=NTS">https://www.genecards.org/cgi-bin/carddisp.pl?gene=NTS</a>                   |
| KLKB1        | Kallikrein B1                                                          | Protein coding    | 47 | GC04P186208 | 4.160516739 | <a href="https://www.genecards.org/cgi-bin/carddisp.pl?gene=KLKB1">https://www.genecards.org/cgi-bin/carddisp.pl?gene=KLKB1</a>               |
| MT-ND2       | Mitochondrially Encoded NADH:Ubiquinone Oxidoreductase Core Subunit 2  | Protein coding    | 34 | GCMTP004472 | 4.160121441 | <a href="https://www.genecards.org/cgi-bin/carddisp.pl?gene=MT-ND2">https://www.genecards.org/cgi-bin/carddisp.pl?gene=MT-ND2</a>             |
| NDUFA1       | NADH:Ubiquinone Oxidoreductase Subunit A1                              | Protein coding    | 44 | GC0XP119871 | 4.152535915 | <a href="https://www.genecards.org/cgi-bin/carddisp.pl?gene=NDUFA1">https://www.genecards.org/cgi-bin/carddisp.pl?gene=NDUFA1</a>             |
| GCG          | Glucagon                                                               | Protein coding    | 41 | GC02M162142 | 4.13766098  | <a href="https://www.genecards.org/cgi-bin/carddisp.pl?gene=GCG">https://www.genecards.org/cgi-bin/carddisp.pl?gene=GCG</a>                   |
| PCCB         | Propionyl-CoA Carboxylase Subunit $\beta$                              | Protein coding    | 47 | GC03P136250 | 4.13540554  | <a href="https://www.genecards.org/cgi-bin/carddisp.pl?gene=PCCB">https://www.genecards.org/cgi-bin/carddisp.pl?gene=PCCB</a>                 |
| TIMP3        | TIMP Metallopeptidase Inhibitor 3                                      | Protein coding    | 45 | GC22P032800 | 4.135045052 | <a href="https://www.genecards.org/cgi-bin/carddisp.pl?gene=TIMP3">https://www.genecards.org/cgi-bin/carddisp.pl?gene=TIMP3</a>               |
| GYS1         | Glycogen Synthase 1                                                    | Protein coding    | 50 | GC19M049510 | 4.134681225 | <a href="https://www.genecards.org/cgi-bin/carddisp.pl?gene=GYS1">https://www.genecards.org/cgi-bin/carddisp.pl?gene=GYS1</a>                 |
| RNLS         | Renalase, FAD Dependent Amine Oxidase                                  | Protein coding    | 38 | GC10M088180 | 4.11588192  | <a href="https://www.genecards.org/cgi-bin/carddisp.pl?gene=RNLS">https://www.genecards.org/cgi-bin/carddisp.pl?gene=RNLS</a>                 |
| KCNMA1       | Potassium Calcium-Activated Channel Subfamily M $\alpha$ 1             | Protein coding    | 50 | GC10M076869 | 4.104284286 | <a href="https://www.genecards.org/cgi-bin/carddisp.pl?gene=KCNMA1">https://www.genecards.org/cgi-bin/carddisp.pl?gene=KCNMA1</a>             |
| PNP          | Purine Nucleoside Phosphorylase                                        | Protein coding    | 47 | GC14P020468 | 4.101555824 | <a href="https://www.genecards.org/cgi-bin/carddisp.pl?gene=PNP">https://www.genecards.org/cgi-bin/carddisp.pl?gene=PNP</a>                   |
| COX4I1       | Cytochrome C Oxidase Subunit 4I1                                       | Protein coding    | 46 | GC16P085798 | 4.094920635 | <a href="https://www.genecards.org/cgi-bin/carddisp.pl?gene=COX4I1">https://www.genecards.org/cgi-bin/carddisp.pl?gene=COX4I1</a>             |
| TERT         | Telomerase Reverse Transcriptase                                       | Protein coding    | 51 | GC05M001253 | 4.087656975 | <a href="https://www.genecards.org/cgi-bin/carddisp.pl?gene=TERT">https://www.genecards.org/cgi-bin/carddisp.pl?gene=TERT</a>                 |
| PAPPA        | Pappalysin 1                                                           | Protein coding    | 40 | GC09P116653 | 4.086742878 | <a href="https://www.genecards.org/cgi-bin/carddisp.pl?gene=PAPPA">https://www.genecards.org/cgi-bin/carddisp.pl?gene=PAPPA</a>               |
| HSD11B2      | Hydroxysteroid 11- $\beta$ Dehydrogenase 2                             | Protein coding    | 46 | GC16P067433 | 4.084470749 | <a href="https://www.genecards.org/cgi-bin/carddisp.pl?gene=HSD11B2">https://www.genecards.org/cgi-bin/carddisp.pl?gene=HSD11B2</a>           |
| SCNN1B       | Sodium Channel Epithelial 1 Subunit $\beta$                            | Protein coding    | 48 | GC16P023278 | 4.070623398 | <a href="https://www.genecards.org/cgi-bin/carddisp.pl?gene=SCNN1B">https://www.genecards.org/cgi-bin/carddisp.pl?gene=SCNN1B</a>             |
| MEFV         | MEFV Innate Immunity Regulator, Pyrin                                  | Protein coding    | 44 | GC16M003970 | 4.066651821 | <a href="https://www.genecards.org/cgi-bin/carddisp.pl?gene=MEFV">https://www.genecards.org/cgi-bin/carddisp.pl?gene=MEFV</a>                 |
| BAD          | BCL2 Associated Agonist Of Cell Death                                  | Protein coding    | 45 | GC11M071604 | 4.054996014 | <a href="https://www.genecards.org/cgi-bin/carddisp.pl?gene=BAD">https://www.genecards.org/cgi-bin/carddisp.pl?gene=BAD</a>                   |
| LOC106029312 | Williams-Beuren Syndrome Medial Block B Recombination Region           | Biological region | 2  | GC07P074733 | 4.050317764 | <a href="https://www.genecards.org/cgi-bin/carddisp.pl?gene=LOC106029312">https://www.genecards.org/cgi-bin/carddisp.pl?gene=LOC106029312</a> |
| IRS2         | Insulin Receptor Substrate 2                                           | Protein coding    | 45 | GC13M109752 | 4.039325237 | <a href="https://www.genecards.org/cgi-bin/carddisp.pl?gene=IRS2">https://www.genecards.org/cgi-bin/carddisp.pl?gene=IRS2</a>                 |
| CDH5         | Cadherin 5                                                             | Protein coding    | 47 | GC16P066366 | 4.039106846 | <a href="https://www.genecards.org/cgi-bin/carddisp.pl?gene=CDH5">https://www.genecards.org/cgi-bin/carddisp.pl?gene=CDH5</a>                 |
| IL9          | Interleukin 9                                                          | Protein coding    | 43 | GC05M135891 | 4.038871765 | <a href="https://www.genecards.org/cgi-bin/carddisp.pl?gene=IL9">https://www.genecards.org/cgi-bin/carddisp.pl?gene=IL9</a>                   |
| PIGA         | Phosphatidylinositol Glycan Anchor Biosynthesis Class A                | Protein coding    | 45 | GC0XM015319 | 4.038198948 | <a href="https://www.genecards.org/cgi-bin/carddisp.pl?gene=PIGA">https://www.genecards.org/cgi-bin/carddisp.pl?gene=PIGA</a>                 |
| NAGS         | N-Acetylglutamate Synthase                                             | Protein coding    | 42 | GC17P044004 | 4.037002563 | <a href="https://www.genecards.org/cgi-bin/carddisp.pl?gene=NAGS">https://www.genecards.org/cgi-bin/carddisp.pl?gene=NAGS</a>                 |
| IGF2BP2      | Insulin Like Growth Factor 2 MRNA Binding Protein 2                    | Protein coding    | 44 | GC03M185643 | 4.024525642 | <a href="https://www.genecards.org/cgi-bin/carddisp.pl?gene=IGF2BP2">https://www.genecards.org/cgi-bin/carddisp.pl?gene=IGF2BP2</a>           |
| ATXN2        | Ataxin 2                                                               | Protein coding    | 43 | GC12M111443 | 3.999251842 | <a href="https://www.genecards.org/cgi-bin/carddisp.pl?gene=ATXN2">https://www.genecards.org/cgi-bin/carddisp.pl?gene=ATXN2</a>               |
| SCGB1A1      | Secretoglobin Family 1A Member 1                                       | Protein coding    | 40 | GC11P062405 | 3.997830153 | <a href="https://www.genecards.org/cgi-bin/carddisp.pl?gene=SCGB1A1">https://www.genecards.org/cgi-bin/carddisp.pl?gene=SCGB1A1</a>           |
| ATFB5        | Atrial Fibrillation, Familial, 5                                       | Genetic locus     | 1  | GC04U900998 | 3.996117353 | <a href="https://www.genecards.org/cgi-bin/carddisp.pl?gene=ATFB5">https://www.genecards.org/cgi-bin/carddisp.pl?gene=ATFB5</a>               |
| WDR45        | WD Repeat Domain 45                                                    | Protein coding    | 40 | GC0XM049074 | 3.989904881 | <a href="https://www.genecards.org/cgi-bin/carddisp.pl?gene=WDR45">https://www.genecards.org/cgi-bin/carddisp.pl?gene=WDR45</a>               |
| MIR451A      | MicroRNA 451a                                                          | RNA gene          | 19 | GC17M028861 | 3.968869925 | <a href="https://www.genecards.org/cgi-bin/carddisp.pl?gene=MIR451A">https://www.genecards.org/cgi-bin/carddisp.pl?gene=MIR451A</a>           |
| APLNR        | Apelin Receptor                                                        | Protein coding    | 43 | GC11M057233 | 3.968307257 | <a href="https://www.genecards.org/cgi-bin/carddisp.pl?gene=APLNR">https://www.genecards.org/cgi-bin/carddisp.pl?gene=APLNR</a>               |
| MT-ND4L      | Mitochondrially Encoded NADH:Ubiquinone Oxidoreductase Core Subunit 4L | Protein coding    | 29 | GCMTP010472 | 3.959968805 | <a href="https://www.genecards.org/cgi-bin/carddisp.pl?gene=MT-ND4L">https://www.genecards.org/cgi-bin/carddisp.pl?gene=MT-ND4L</a>           |
| GPX3         | Glutathione Peroxidase 3                                               | Protein coding    | 43 | GC05P150997 | 3.936702967 | <a href="https://www.genecards.org/cgi-bin/carddisp.pl?gene=GPX3">https://www.genecards.org/cgi-bin/carddisp.pl?gene=GPX3</a>                 |
| UCP3         | Uncoupling Protein 3                                                   | Protein coding    | 43 | GC11M074000 | 3.935195446 | <a href="https://www.genecards.org/cgi-bin/carddisp.pl?gene=UCP3">https://www.genecards.org/cgi-bin/carddisp.pl?gene=UCP3</a>                 |
| DMD          | Dystrophin                                                             | Protein coding    | 47 | GC0XM031097 | 3.934718132 | <a href="https://www.genecards.org/cgi-bin/carddisp.pl?gene=DMD">https://www.genecards.org/cgi-bin/carddisp.pl?gene=DMD</a>                   |
| MIR499A      | MicroRNA 499a                                                          | RNA gene          | 22 | GC20P034990 | 3.932772636 | <a href="https://www.genecards.org/cgi-bin/carddisp.pl?gene=MIR499A">https://www.genecards.org/cgi-bin/carddisp.pl?gene=MIR499A</a>           |
| MTAP         | Methylthioadenosine Phosphorylase                                      | Protein coding    | 48 | GC09P021792 | 3.920066357 | <a href="https://www.genecards.org/cgi-bin/carddisp.pl?gene=MTAP">https://www.genecards.org/cgi-bin/carddisp.pl?gene=MTAP</a>                 |
| CMA1         | Chymase 1                                                              | Protein coding    | 44 | GC14M024506 | 3.907726288 | <a href="https://www.genecards.org/cgi-bin/carddisp.pl?gene=CMA1">https://www.genecards.org/cgi-bin/carddisp.pl?gene=CMA1</a>                 |
| MIR149       | MicroRNA 149                                                           | RNA gene          | 21 | GC02P240456 | 3.907142639 | <a href="https://www.genecards.org/cgi-bin/carddisp.pl?gene=MIR149">https://www.genecards.org/cgi-bin/carddisp.pl?gene=MIR149</a>             |
| MIR30A       | MicroRNA 30a                                                           | RNA gene          | 20 | GC06M071403 | 3.906103611 | <a href="https://www.genecards.org/cgi-bin/carddisp.pl?gene=MIR30A">https://www.genecards.org/cgi-bin/carddisp.pl?gene=MIR30A</a>             |
| KCNJ11       | Potassium Inwardly Rectifying Channel Subfamily J Member 11            | Protein coding    | 48 | GC11M017364 | 3.900326729 | <a href="https://www.genecards.org/cgi-bin/carddisp.pl?gene=KCNJ11">https://www.genecards.org/cgi-bin/carddisp.pl?gene=KCNJ11</a>             |
| NT5E         | 5'-Nucleotidase Ecto                                                   | Protein coding    | 51 | GC06P085449 | 3.899983883 | <a href="https://www.genecards.org/cgi-bin/carddisp.pl?gene=NT5E">https://www.genecards.org/cgi-bin/carddisp.pl?gene=NT5E</a>                 |
| HABP2        | Hyaluronan Binding Protein 2                                           | Protein coding    | 45 | GC10P113550 | 3.896471739 | <a href="https://www.genecards.org/cgi-bin/carddisp.pl?gene=HABP2">https://www.genecards.org/cgi-bin/carddisp.pl?gene=HABP2</a>               |
| MIR122       | MicroRNA 122                                                           | RNA gene          | 22 | GC18P058451 | 3.887628078 | <a href="https://www.genecards.org/cgi-bin/carddisp.pl?gene=MIR122">https://www.genecards.org/cgi-bin/carddisp.pl?gene=MIR122</a>             |
| KYNU         | Kynureninase                                                           | Protein coding    | 47 | GC02P142877 | 3.884968519 | <a href="https://www.genecards.org/cgi-bin/carddisp.pl?gene=KYNU">https://www.genecards.org/cgi-bin/carddisp.pl?gene=KYNU</a>                 |
| CELSR1       | Cadherin EGF LAG Seven-Pass G-Type Receptor 1                          | Protein coding    | 41 | GC22M046360 | 3.865314484 | <a href="https://www.genecards.org/cgi-bin/carddisp.pl?gene=CELSR1">https://www.genecards.org/cgi-bin/carddisp.pl?gene=CELSR1</a>             |
| CYP1A1       | Cytochrome P450 Family 1 Subfamily A Member 1                          | Protein coding    | 47 | GC15M074719 | 3.860416412 | <a href="https://www.genecards.org/cgi-bin/carddisp.pl?gene=CYP1A1">https://www.genecards.org/cgi-bin/carddisp.pl?gene=CYP1A1</a>             |
| JUN          | Jun Proto-Oncogene, AP-1 Transcription Factor Subunit                  | Protein coding    | 48 | GC01M058780 | 3.857952595 | <a href="https://www.genecards.org/cgi-bin/carddisp.pl?gene=JUN">https://www.genecards.org/cgi-bin/carddisp.pl?gene=JUN</a>                   |
| GGCX         | $\gamma$ -Glutamyl Carboxylase                                         | Protein coding    | 47 | GC02M085544 | 3.856995821 | <a href="https://www.genecards.org/cgi-bin/carddisp.pl?gene=GGCX">https://www.genecards.org/cgi-bin/carddisp.pl?gene=GGCX</a>                 |
| MIR223       | MicroRNA 223                                                           | RNA gene          | 22 | GC0XP066018 | 3.856517553 | <a href="https://www.genecards.org/cgi-bin/carddisp.pl?gene=MIR223">https://www.genecards.org/cgi-bin/carddisp.pl?gene=MIR223</a>             |
| SGK1         | Serum/Glucocorticoid Regulated Kinase 1                                | Protein coding    | 48 | GC06M134169 | 3.855800629 | <a href="https://www.genecards.org/cgi-bin/carddisp.pl?gene=SGK1">https://www.genecards.org/cgi-bin/carddisp.pl?gene=SGK1</a>                 |
| TYR          | Tyrosinase                                                             | Protein coding    | 47 | GC11P089177 | 3.855480671 | <a href="https://www.genecards.org/cgi-bin/carddisp.pl?gene=TYR">https://www.genecards.org/cgi-bin/carddisp.pl?gene=TYR</a>                   |
| CYP17A1      | Cytochrome P450 Family 17 Subfamily A Member 1                         | Protein coding    | 49 | GC10M102830 | 3.854734898 | <a href="https://www.genecards.org/cgi-bin/carddisp.pl?gene=CYP17A1">https://www.genecards.org/cgi-bin/carddisp.pl?gene=CYP17A1</a>           |
| NTN1         | Netrin 1                                                               | Protein coding    | 44 | GC17P009021 | 3.84481144  | <a href="https://www.genecards.org/cgi-bin/carddisp.pl?gene=NTN1">https://www.genecards.org/cgi-bin/carddisp.pl?gene=NTN1</a>                 |
| MIR144       | MicroRNA 144                                                           | RNA gene          | 18 | GC17M031468 | 3.839379311 | <a href="https://www.genecards.org/cgi-bin/carddisp.pl?gene=MIR144">https://www.genecards.org/cgi-bin/carddisp.pl?gene=MIR144</a>             |
| XRCC1        | X-Ray Repair Cross Complementing 1                                     | Protein coding    | 44 | GC19M043543 | 3.822722197 | <a href="https://www.genecards.org/cgi-bin/carddisp.pl?gene=XRCC1">https://www.genecards.org/cgi-bin/carddisp.pl?gene=XRCC1</a>               |
| MROS         | Melkersson-Rosenthal Syndrome                                          | Genetic locus     | 2  | GC09U990083 | 3.818276405 | <a href="https://www.genecards.org/cgi-bin/carddisp.pl?gene=MROS">https://www.genecards.org/cgi-bin/carddisp.pl?gene=MROS</a>                 |
| ERCC8        | ERCC Excision Repair 8, CSA Ubiquitin Ligase Complex Subunit           | Protein coding    | 42 | GC05M060876 | 3.813338041 | <a href="https://www.genecards.org/cgi-bin/carddisp.pl?gene=ERCC8">https://www.genecards.org/cgi-bin/carddisp.pl?gene=ERCC8</a>               |
| HGF          | Hepatocyte Growth Factor                                               | Protein coding    | 51 | GC07M081699 | 3.81035471  | <a href="https://www.genecards.org/cgi-bin/carddisp.pl?gene=HGF">https://www.genecards.org/cgi-bin/carddisp.pl?gene=HGF</a>                   |
| PRKN         | Parkin RBR E3 Ubiquitin Protein Ligase                                 | Protein coding    | 39 | GC06M161348 | 3.80499506  | <a href="https://www.genecards.org/cgi-bin/carddisp.pl?gene=PRKN">https://www.genecards.org/cgi-bin/carddisp.pl?gene=PRKN</a>                 |

|              |                                                                  |                   |    |             |             |                                                                 |
|--------------|------------------------------------------------------------------|-------------------|----|-------------|-------------|-----------------------------------------------------------------|
| THBS1        | Thrombospondin 1                                                 | Protein coding    | 44 | GC15P039581 | 3.800085545 | https://www.genecards.org/cgi-bin/carddisp.pl?gene=THBS1        |
| IMPA2        | Inositol Monophosphatase 2                                       | Protein coding    | 44 | GC18P011981 | 3.788786173 | https://www.genecards.org/cgi-bin/carddisp.pl?gene=IMPA2        |
| KITLG        | KIT Ligand                                                       | Protein coding    | 44 | GC12M088492 | 3.786730289 | https://www.genecards.org/cgi-bin/carddisp.pl?gene=KITLG        |
| SLC17A5      | Solute Carrier Family 17 Member 5                                | Protein coding    | 44 | GC06M073593 | 3.784972906 | https://www.genecards.org/cgi-bin/carddisp.pl?gene=SLC17A5      |
| LAMP2        | Lysosomal Associated Membrane Protein 2                          | Protein coding    | 44 | GC0XM120426 | 3.768020391 | https://www.genecards.org/cgi-bin/carddisp.pl?gene=LAMP2        |
| CCN2         | Cellular Communication Network Factor 2                          | Protein coding    | 38 | GC06M131948 | 3.759025097 | https://www.genecards.org/cgi-bin/carddisp.pl?gene=CCN2         |
| KIT          | KIT Proto-Oncogene, Receptor Tyrosine Kinase                     | Protein coding    | 52 | GC04P054657 | 3.755486012 | https://www.genecards.org/cgi-bin/carddisp.pl?gene=KIT          |
| IGFBP1       | Insulin Like Growth Factor Binding Protein 1                     | Protein coding    | 43 | GC07P046936 | 3.747914076 | https://www.genecards.org/cgi-bin/carddisp.pl?gene=IGFBP1       |
| LIF          | LIF Interleukin 6 Family Cytokine                                | Protein coding    | 41 | GC22M030240 | 3.746820211 | https://www.genecards.org/cgi-bin/carddisp.pl?gene=LIF          |
| MMP7         | Matrix Metallopeptidase 7                                        | Protein coding    | 48 | GC11M102425 | 3.735569954 | https://www.genecards.org/cgi-bin/carddisp.pl?gene=MMP7         |
| MDM2         | MDM2 Proto-Oncogene                                              | Protein coding    | 52 | GC12P068808 | 3.732131243 | https://www.genecards.org/cgi-bin/carddisp.pl?gene=MDM2         |
| APOL1        | Apolipoprotein L1                                                | Protein coding    | 44 | GC22P036253 | 3.731431007 | https://www.genecards.org/cgi-bin/carddisp.pl?gene=APOL1        |
| GCH1         | GTP Cyclohydrolase 1                                             | Protein coding    | 47 | GC14M054842 | 3.724099636 | https://www.genecards.org/cgi-bin/carddisp.pl?gene=GCH1         |
| IRAK1        | Interleukin 1 Receptor Associated Kinase 1                       | Protein coding    | 49 | GC0XM154010 | 3.722781897 | https://www.genecards.org/cgi-bin/carddisp.pl?gene=IRAK1        |
| MASP2        | MBL Associated Serine Protease 2                                 | Protein coding    | 46 | GC01M011026 | 3.720680237 | https://www.genecards.org/cgi-bin/carddisp.pl?gene=MASP2        |
| PON3         | Paraoxonase 3                                                    | Protein coding    | 44 | GC07M095359 | 3.71866703  | https://www.genecards.org/cgi-bin/carddisp.pl?gene=PON3         |
| ITLN1        | Intelectin 1                                                     | Protein coding    | 38 | GC01M160876 | 3.715398312 | https://www.genecards.org/cgi-bin/carddisp.pl?gene=ITLN1        |
| WRN          | WRN RecQ Like Helicase                                           | Protein coding    | 45 | GC08P031033 | 3.715301991 | https://www.genecards.org/cgi-bin/carddisp.pl?gene=WRN          |
| TAC1         | Tachykinin Precursor 1                                           | Protein coding    | 43 | GC07P097731 | 3.713142395 | https://www.genecards.org/cgi-bin/carddisp.pl?gene=TAC1         |
| KARS1        | Lyssyl-TRNA Synthetase 1                                         | Protein coding    | 37 | GC16M075628 | 3.701917171 | https://www.genecards.org/cgi-bin/carddisp.pl?gene=KARS1        |
| ADAM17       | ADAM Metallopeptidase Domain 17                                  | Protein coding    | 51 | GC02M009488 | 3.686322212 | https://www.genecards.org/cgi-bin/carddisp.pl?gene=ADAM17       |
| SLC2A4       | Solute Carrier Family 2 Member 4                                 | Protein coding    | 46 | GC17P009310 | 3.678814888 | https://www.genecards.org/cgi-bin/carddisp.pl?gene=SLC2A4       |
| C4B          | Complement C4B (Chido Blood Group)                               | Protein coding    | 43 | GC06P032014 | 3.671227932 | https://www.genecards.org/cgi-bin/carddisp.pl?gene=C4B          |
| RAI1         | Retinoic Acid Induced 1                                          | Protein coding    | 40 | GC17P017682 | 3.670593262 | https://www.genecards.org/cgi-bin/carddisp.pl?gene=RAI1         |
| GC           | GC Vitamin D Binding Protein                                     | Protein coding    | 43 | GC04M071741 | 3.665287495 | https://www.genecards.org/cgi-bin/carddisp.pl?gene=GC           |
| MEG3         | Maternally Expressed 3                                           | RNA gene          | 30 | GC14P106791 | 3.664371014 | https://www.genecards.org/cgi-bin/carddisp.pl?gene=MEG3         |
| TYMP         | Thymidine Phosphorylase                                          | Protein coding    | 46 | GC22M050525 | 3.658165216 | https://www.genecards.org/cgi-bin/carddisp.pl?gene=TYMP         |
| CCR3         | C-C Motif Chemokine Receptor 3                                   | Protein coding    | 47 | GC03P046163 | 3.65374279  | https://www.genecards.org/cgi-bin/carddisp.pl?gene=CCR3         |
| FOXP2        | Forkhead Box P2                                                  | Protein coding    | 44 | GC07P114086 | 3.652798891 | https://www.genecards.org/cgi-bin/carddisp.pl?gene=FOXP2        |
| MIR196A2     | MicroRNA 196a-2                                                  | RNA gene          | 22 | GC12P054542 | 3.637716293 | https://www.genecards.org/cgi-bin/carddisp.pl?gene=MIR196A2     |
| IL37         | Interleukin 37                                                   | Protein coding    | 37 | GC02P117299 | 3.629179955 | https://www.genecards.org/cgi-bin/carddisp.pl?gene=IL37         |
| MIR181A1     | MicroRNA 181a-1                                                  | RNA gene          | 19 | GC01M198860 | 3.623659611 | https://www.genecards.org/cgi-bin/carddisp.pl?gene=MIR181A1     |
| FABP3        | Fatty Acid Binding Protein 3                                     | Protein coding    | 43 | GC01M031365 | 3.618423223 | https://www.genecards.org/cgi-bin/carddisp.pl?gene=FABP3        |
| S100A1       | S100 Calcium Binding Protein A1                                  | Protein coding    | 41 | GC01P153627 | 3.616727829 | https://www.genecards.org/cgi-bin/carddisp.pl?gene=S100A1       |
| WNK1         | WNK Lysine Deficient Protein Kinase 1                            | Protein coding    | 47 | GC12P000733 | 3.613400936 | https://www.genecards.org/cgi-bin/carddisp.pl?gene=WNK1         |
| ITGAL        | Integrin Subunit $\alpha$ L                                      | Protein coding    | 46 | GC16P030472 | 3.612178326 | https://www.genecards.org/cgi-bin/carddisp.pl?gene=ITGAL        |
| ACP5         | Acid Phosphatase 5, Tartrate Resistant                           | Protein coding    | 47 | GC19M011574 | 3.608444929 | https://www.genecards.org/cgi-bin/carddisp.pl?gene=ACP5         |
| CCL5         | C-C Motif Chemokine Ligand 5                                     | Protein coding    | 43 | GC17M035871 | 3.602361202 | https://www.genecards.org/cgi-bin/carddisp.pl?gene=CCL5         |
| PPARGC1A     | PPARG Coactivator 1 $\alpha$                                     | Protein coding    | 46 | GC04M023755 | 3.601317883 | https://www.genecards.org/cgi-bin/carddisp.pl?gene=PPARGC1A     |
| HSPB1        | Heat Shock Protein Family B (Small) Member 1                     | Protein coding    | 51 | GC07P076302 | 3.599119186 | https://www.genecards.org/cgi-bin/carddisp.pl?gene=HSPB1        |
| IL3          | Interleukin 3                                                    | Protein coding    | 43 | GC05P132060 | 3.597385883 | https://www.genecards.org/cgi-bin/carddisp.pl?gene=IL3          |
| KCNK17       | Potassium Two Pore Domain Channel Subfamily K Member 17          | Protein coding    | 36 | GC06M049287 | 3.593248844 | https://www.genecards.org/cgi-bin/carddisp.pl?gene=KCNK17       |
| ALOX12       | Arachidonate 12-Lipoxygenase, 12S Type                           | Protein coding    | 44 | GC17P006995 | 3.592920303 | https://www.genecards.org/cgi-bin/carddisp.pl?gene=ALOX12       |
| MAPK8        | Mitogen-Activated Protein Kinase 8                               | Protein coding    | 50 | GC10P048306 | 3.575964212 | https://www.genecards.org/cgi-bin/carddisp.pl?gene=MAPK8        |
| TIMP2        | TIMP Metallopeptidase Inhibitor 2                                | Protein coding    | 43 | GC17M078852 | 3.572782516 | https://www.genecards.org/cgi-bin/carddisp.pl?gene=TIMP2        |
| PTK2B        | Protein Tyrosine Kinase 2 $\beta$                                | Protein coding    | 50 | GC08P027311 | 3.571918964 | https://www.genecards.org/cgi-bin/carddisp.pl?gene=PTK2B        |
| FTO          | FTO $\alpha$ -Ketoglutarate Dependent Dioxygenase                | Protein coding    | 45 | GC16P053737 | 3.562188625 | https://www.genecards.org/cgi-bin/carddisp.pl?gene=FTO          |
| NUP155       | Nucleoporin 155                                                  | Protein coding    | 44 | GC05M037288 | 3.561933517 | https://www.genecards.org/cgi-bin/carddisp.pl?gene=NUP155       |
| TRPV4        | Transient Receptor Potential Cation Channel Subfamily V Member 4 | Protein coding    | 50 | GC12M109783 | 3.56115818  | https://www.genecards.org/cgi-bin/carddisp.pl?gene=TRPV4        |
| GGT1         | $\gamma$ -Glutamyltransferase 1                                  | Protein coding    | 48 | GC22P024583 | 3.555764198 | https://www.genecards.org/cgi-bin/carddisp.pl?gene=GGT1         |
| PVALB        | Parvalbumin                                                      | Protein coding    | 38 | GC22M036800 | 3.555222511 | https://www.genecards.org/cgi-bin/carddisp.pl?gene=PVALB        |
| CLCN6        | Chloride Voltage-Gated Channel 6                                 | Protein coding    | 43 | GC01P011806 | 3.554638624 | https://www.genecards.org/cgi-bin/carddisp.pl?gene=CLCN6        |
| LOC106627981 | GBA Recombination Region                                         | Biological region | 2  | GC01P155233 | 3.546694756 | https://www.genecards.org/cgi-bin/carddisp.pl?gene=LOC106627981 |
| TNFRSF1B     | TNF Receptor Superfamily Member 1B                               | Protein coding    | 47 | GC01P012167 | 3.545584679 | https://www.genecards.org/cgi-bin/carddisp.pl?gene=TNFRSF1B     |
| WARS2        | Tryptophanyl TRNA Synthetase 2, Mitochondrial                    | Protein coding    | 45 | GC01M119031 | 3.537296057 | https://www.genecards.org/cgi-bin/carddisp.pl?gene=WARS2        |
| TFB1M        | Transcription Factor B1, Mitochondrial                           | Protein coding    | 42 | GC06M155247 | 3.537296057 | https://www.genecards.org/cgi-bin/carddisp.pl?gene=TFB1M        |
| DNAH5        | Dynein Axonemal Heavy Chain 5                                    | Protein coding    | 40 | GC05M013693 | 3.533631563 | https://www.genecards.org/cgi-bin/carddisp.pl?gene=DNAH5        |
| CCDC88C      | Coiled-Coil Domain Containing 88C                                | Protein coding    | 39 | GC14M091271 | 3.529526711 | https://www.genecards.org/cgi-bin/carddisp.pl?gene=CCDC88C      |
| DDAH1        | Dimethylarginine Dimethylaminohydrolase 1                        | Protein coding    | 43 | GC01M085318 | 3.522596598 | https://www.genecards.org/cgi-bin/carddisp.pl?gene=DDAH1        |
| INSR         | Insulin Receptor                                                 | Protein coding    | 53 | GC19M007112 | 3.5223279   | https://www.genecards.org/cgi-bin/carddisp.pl?gene=INSR         |
| ESR2         | Estrogen Receptor 2                                              | Protein coding    | 49 | GC14M064084 | 3.518482685 | https://www.genecards.org/cgi-bin/carddisp.pl?gene=ESR2         |
| ROCK1        | Rho Associated Coiled-Coil Containing Protein Kinase 1           | Protein coding    | 50 | GC18M020946 | 3.509199142 | https://www.genecards.org/cgi-bin/carddisp.pl?gene=ROCK1        |
| GHR          | Growth Hormone Receptor                                          | Protein coding    | 46 | GC05P042429 | 3.473473787 | https://www.genecards.org/cgi-bin/carddisp.pl?gene=GHR          |
| SLCO1C1      | Solute Carrier Organic Anion Transporter Family Member 1C1       | Protein coding    | 40 | GC12P020695 | 3.454162836 | https://www.genecards.org/cgi-bin/carddisp.pl?gene=SLCO1C1      |
| TWIST1       | Twist Family BHLH Transcription Factor 1                         | Protein coding    | 46 | GC07M019020 | 3.451712608 | https://www.genecards.org/cgi-bin/carddisp.pl?gene=TWIST1       |
| MTOR         | Mechanistic Target Of Rapamycin Kinase                           | Protein coding    | 54 | GC01M011106 | 3.446678162 | https://www.genecards.org/cgi-bin/carddisp.pl?gene=MTOR         |
| CYP11B1      | Cytochrome P450 Family 11 Subfamily B Member 1                   | Protein coding    | 48 | GC08M142872 | 3.434547663 | https://www.genecards.org/cgi-bin/carddisp.pl?gene=CYP11B1      |
| SOST         | Sclerostin                                                       | Protein coding    | 43 | GC17M043753 | 3.433771372 | https://www.genecards.org/cgi-bin/carddisp.pl?gene=SOST         |
| NR4A2        | Nuclear Receptor Subfamily 4 Group A Member 2                    | Protein coding    | 47 | GC02M156324 | 3.424216032 | https://www.genecards.org/cgi-bin/carddisp.pl?gene=NR4A2        |
| GAA          | $\alpha$ Glucosidase                                             | Protein coding    | 47 | GC17P080101 | 3.417210817 | https://www.genecards.org/cgi-bin/carddisp.pl?gene=GAA          |
| NEFH         | Neurofilament Heavy Chain                                        | Protein coding    | 46 | GC22P029480 | 3.413326263 | https://www.genecards.org/cgi-bin/carddisp.pl?gene=NEFH         |
| CD68         | CD68 Molecule                                                    | Protein coding    | 39 | GC17P007579 | 3.407513618 | https://www.genecards.org/cgi-bin/carddisp.pl?gene=CD68         |
| SHBG         | Sex Hormone Binding Globulin                                     | Protein coding    | 40 | GC17P007613 | 3.393645763 | https://www.genecards.org/cgi-bin/carddisp.pl?gene=SHBG         |
| H2AC18       | H2A Clustered Histone 18                                         | Protein coding    | 27 | GC01M150202 | 3.382412434 | https://www.genecards.org/cgi-bin/carddisp.pl?gene=H2AC18       |
| IGF1R        | Insulin Like Growth Factor 1 Receptor                            | Protein coding    | 54 | GC15P098648 | 3.380025625 | https://www.genecards.org/cgi-bin/carddisp.pl?gene=IGF1R        |
| CYP1B1       | Cytochrome P450 Family 1 Subfamily B Member 1                    | Protein coding    | 48 | GC02M038066 | 3.37464118  | https://www.genecards.org/cgi-bin/carddisp.pl?gene=CYP1B1       |

|          |                                                                           |                |    |             |             |                                                             |
|----------|---------------------------------------------------------------------------|----------------|----|-------------|-------------|-------------------------------------------------------------|
| KIF6     | Kinesin Family Member 6                                                   | Protein coding | 37 | GC06M049285 | 3.373132706 | https://www.genecards.org/cgi-bin/carddisp.pl?gene=KIF6     |
| GRIK2    | Glutamate Ionotropic Receptor Kainate Type Subunit 2                      | Protein coding | 47 | GC06P100962 | 3.372010231 | https://www.genecards.org/cgi-bin/carddisp.pl?gene=GRIK2    |
| C4A      | Complement C4A (Rodgers Blood Group)                                      | Protein coding | 44 | GC06P058333 | 3.36608839  | https://www.genecards.org/cgi-bin/carddisp.pl?gene=C4A      |
| AR       | Androgen Receptor                                                         | Protein coding | 52 | GC0XP067544 | 3.363680601 | https://www.genecards.org/cgi-bin/carddisp.pl?gene=AR       |
| SLC19A1  | Solute Carrier Family 19 Member 1                                         | Protein coding | 47 | GC21M045493 | 3.351695299 | https://www.genecards.org/cgi-bin/carddisp.pl?gene=SLC19A1  |
| ADAMTS7  | ADAM Metallopeptidase With Thrombospondin Type 1 Motif 7                  | Protein coding | 40 | GC15M078759 | 3.340489388 | https://www.genecards.org/cgi-bin/carddisp.pl?gene=ADAMTS7  |
| MIRLET7B | MicroRNA Let-7b                                                           | RNA gene       | 21 | GC22P046119 | 3.328681469 | https://www.genecards.org/cgi-bin/carddisp.pl?gene=MIRLET7B |
| IDO1     | Indoleamine 2,3-Dioxygenase 1                                             | Protein coding | 44 | GC08P039891 | 3.327741623 | https://www.genecards.org/cgi-bin/carddisp.pl?gene=IDO1     |
| DRD2     | Dopamine Receptor D2                                                      | Protein coding | 50 | GC11M113409 | 3.32753849  | https://www.genecards.org/cgi-bin/carddisp.pl?gene=DRD2     |
| ALPL     | Alkaline Phosphatase, Biom mineralization Associated                      | Protein coding | 50 | GC01P021508 | 3.327400684 | https://www.genecards.org/cgi-bin/carddisp.pl?gene=ALPL     |
| TXN      | Thioredoxin                                                               | Protein coding | 45 | GC09M110243 | 3.315989971 | https://www.genecards.org/cgi-bin/carddisp.pl?gene=TXN      |
| MIR199A1 | MicroRNA 199a-1                                                           | RNA gene       | 19 | GC19M010817 | 3.315351486 | https://www.genecards.org/cgi-bin/carddisp.pl?gene=MIR199A1 |
| ALOX15   | Arachidonate 15-Lipoxygenase                                              | Protein coding | 44 | GC17M004630 | 3.315172195 | https://www.genecards.org/cgi-bin/carddisp.pl?gene=ALOX15   |
| STX1A    | Syntaxin 1A                                                               | Protein coding | 47 | GC07M073700 | 3.303699017 | https://www.genecards.org/cgi-bin/carddisp.pl?gene=STX1A    |
| AIFM1    | Apoptosis Inducing Factor Mitochondria Associated 1                       | Protein coding | 48 | GC0XM130129 | 3.298995972 | https://www.genecards.org/cgi-bin/carddisp.pl?gene=AIFM1    |
| MIR29A   | MicroRNA 29a                                                              | RNA gene       | 22 | GC07M130876 | 3.290714741 | https://www.genecards.org/cgi-bin/carddisp.pl?gene=MIR29A   |
| GAPDH    | Glyceraldehyde-3-Phosphate Dehydrogenase                                  | Protein coding | 47 | GC12P013162 | 3.288787842 | https://www.genecards.org/cgi-bin/carddisp.pl?gene=GAPDH    |
| NR1H3    | Nuclear Receptor Subfamily 1 Group H Member 3                             | Protein coding | 47 | GC11P047248 | 3.286007881 | https://www.genecards.org/cgi-bin/carddisp.pl?gene=NR1H3    |
| KCNB1    | Potassium Voltage-Gated Channel Subfamily B Member 1                      | Protein coding | 47 | GC20M049293 | 3.279401302 | https://www.genecards.org/cgi-bin/carddisp.pl?gene=KCNB1    |
| HAVCR1   | Hepatitis A Virus Cellular Receptor 1                                     | Protein coding | 41 | GC05M157028 | 3.27886939  | https://www.genecards.org/cgi-bin/carddisp.pl?gene=HAVCR1   |
| JPH3     | Junctophilin 3                                                            | Protein coding | 41 | GC16P087601 | 3.27793169  | https://www.genecards.org/cgi-bin/carddisp.pl?gene=JPH3     |
| SPTB     | Spectrin $\beta$ , Erythrocytic                                           | Protein coding | 40 | GC14M064746 | 3.276830435 | https://www.genecards.org/cgi-bin/carddisp.pl?gene=SPTB     |
| NOTCH4   | Notch Receptor 4                                                          | Protein coding | 45 | GC06M049148 | 3.274196863 | https://www.genecards.org/cgi-bin/carddisp.pl?gene=NOTCH4   |
| SOCS1    | Suppressor Of Cytokine Signaling 1                                        | Protein coding | 43 | GC16M011255 | 3.265773535 | https://www.genecards.org/cgi-bin/carddisp.pl?gene=SOCS1    |
| PIGQ     | Phosphatidylinositol Glycan Anchor Biosynthesis Class Q                   | Protein coding | 43 | GC16P006116 | 3.262368441 | https://www.genecards.org/cgi-bin/carddisp.pl?gene=PIGQ     |
| MS4A2    | Membrane Spanning 4-Domains A2                                            | Protein coding | 41 | GC11P060088 | 3.255297422 | https://www.genecards.org/cgi-bin/carddisp.pl?gene=MS4A2    |
| GPX1     | Glutathione Peroxidase 1                                                  | Protein coding | 47 | GC03M049537 | 3.252576828 | https://www.genecards.org/cgi-bin/carddisp.pl?gene=GPX1     |
| SUOX     | Sulfite Oxidase                                                           | Protein coding | 45 | GC12P055997 | 3.249260426 | https://www.genecards.org/cgi-bin/carddisp.pl?gene=SUOX     |
| NPC1     | NPC Intracellular Cholesterol Transporter 1                               | Protein coding | 47 | GC18M023506 | 3.248376369 | https://www.genecards.org/cgi-bin/carddisp.pl?gene=NPC1     |
| MMP10    | Matrix Metallopeptidase 10                                                | Protein coding | 46 | GC11M102770 | 3.242784023 | https://www.genecards.org/cgi-bin/carddisp.pl?gene=MMP10    |
| VIPR2    | Vasoactive Intestinal Peptide Receptor 2                                  | Protein coding | 44 | GC07M159028 | 3.241565704 | https://www.genecards.org/cgi-bin/carddisp.pl?gene=VIPR2    |
| BDKRB2   | Bradykinin Receptor B2                                                    | Protein coding | 44 | GC14P096205 | 3.2316432   | https://www.genecards.org/cgi-bin/carddisp.pl?gene=BDKRB2   |
| IL33     | Interleukin 33                                                            | Protein coding | 38 | GC09P006206 | 3.223978519 | https://www.genecards.org/cgi-bin/carddisp.pl?gene=IL33     |
| DLL4     | $\delta$ Like Canonical Notch Ligand 4                                    | Protein coding | 45 | GC15P040929 | 3.222126961 | https://www.genecards.org/cgi-bin/carddisp.pl?gene=DLL4     |
| CACNA1C  | Calcium Voltage-Gated Channel Subunit $\alpha$ 1 C                        | Protein coding | 49 | GC12P001970 | 3.216880083 | https://www.genecards.org/cgi-bin/carddisp.pl?gene=CACNA1C  |
| CDH13    | Cadherin 13                                                               | Protein coding | 43 | GC16P082626 | 3.216671944 | https://www.genecards.org/cgi-bin/carddisp.pl?gene=CDH13    |
| ADAMTSL1 | ADAMTS Like 1                                                             | Protein coding | 41 | GC09P017906 | 3.214998245 | https://www.genecards.org/cgi-bin/carddisp.pl?gene=ADAMTSL1 |
| APOA4    | Apolipoprotein A4                                                         | Protein coding | 42 | GC11M116820 | 3.213994741 | https://www.genecards.org/cgi-bin/carddisp.pl?gene=APOA4    |
| SLC6A3   | Solute Carrier Family 6 Member 3                                          | Protein coding | 50 | GC05M001392 | 3.207286358 | https://www.genecards.org/cgi-bin/carddisp.pl?gene=SLC6A3   |
| TIE1     | Tyrosine Kinase With Immunoglobulin Like And EGF Like Domains 1           | Protein coding | 42 | GC01P043300 | 3.204343557 | https://www.genecards.org/cgi-bin/carddisp.pl?gene=TIE1     |
| LEPQTL1  | Leptin, Serum Levels Of                                                   | Genetic locus  | 2  | GC02U903086 | 3.203526497 | https://www.genecards.org/cgi-bin/carddisp.pl?gene=LEPQTL1  |
| GCK      | Glucokinase                                                               | Protein coding | 50 | GC07M044190 | 3.202139139 | https://www.genecards.org/cgi-bin/carddisp.pl?gene=GCK      |
| FNDC5    | Fibronectin Type III Domain Containing 5                                  | Protein coding | 33 | GC01M032877 | 3.19818306  | https://www.genecards.org/cgi-bin/carddisp.pl?gene=FNDC5    |
| BRAP     | BRCA1 Associated Protein                                                  | Protein coding | 41 | GC12M111642 | 3.191978931 | https://www.genecards.org/cgi-bin/carddisp.pl?gene=BRAP     |
| VASP     | Vasodilator Stimulated Phosphoprotein                                     | Protein coding | 43 | GC19P045507 | 3.186223984 | https://www.genecards.org/cgi-bin/carddisp.pl?gene=VASP     |
| SREBF1   | Sterol Regulatory Element Binding Transcription Factor 1                  | Protein coding | 45 | GC17M017810 | 3.180946827 | https://www.genecards.org/cgi-bin/carddisp.pl?gene=SREBF1   |
| CFLAR    | CASP8 And FADD Like Apoptosis Regulator                                   | Protein coding | 45 | GC02P01117  | 3.174108982 | https://www.genecards.org/cgi-bin/carddisp.pl?gene=CFLAR    |
| ADCYAP1  | Adenylate Cyclase Activating Polypeptide 1                                | Protein coding | 42 | GC18P000895 | 3.172010899 | https://www.genecards.org/cgi-bin/carddisp.pl?gene=ADCYAP1  |
| ABCG2    | ATP Binding Cassette Subfamily G Member 2 (Junior Blood Group)            | Protein coding | 50 | GC04M088090 | 3.166645765 | https://www.genecards.org/cgi-bin/carddisp.pl?gene=ABCG2    |
| DLL1     | $\delta$ Like Canonical Notch Ligand 1                                    | Protein coding | 45 | GC06M170282 | 3.165777206 | https://www.genecards.org/cgi-bin/carddisp.pl?gene=DLL1     |
| CD79A    | CD79a Molecule                                                            | Protein coding | 46 | GC19P041877 | 3.161233902 | https://www.genecards.org/cgi-bin/carddisp.pl?gene=CD79A    |
| RBPJ     | Recombination Signal Binding Protein For Immunoglobulin $\kappa$ J Region | Protein coding | 47 | GC04P026165 | 3.157582998 | https://www.genecards.org/cgi-bin/carddisp.pl?gene=RBPJ     |
| TCF7     | Transcription Factor 7                                                    | Protein coding | 45 | GC05P134114 | 3.144065857 | https://www.genecards.org/cgi-bin/carddisp.pl?gene=TCF7     |
| GNAS     | GNAS Complex Locus                                                        | Protein coding | 51 | GC20P058839 | 3.142588139 | https://www.genecards.org/cgi-bin/carddisp.pl?gene=GNAS     |
| CAMK2G   | Calcium/Calmodulin Dependent Protein Kinase II $\gamma$                   | Protein coding | 48 | GC10M073812 | 3.136489153 | https://www.genecards.org/cgi-bin/carddisp.pl?gene=CAMK2G   |
| DLG4     | Discs Large MAGUK Scaffold Protein 4                                      | Protein coding | 48 | GC17M007189 | 3.127924919 | https://www.genecards.org/cgi-bin/carddisp.pl?gene=DLG4     |
| PTGDS    | Prostaglandin D2 Synthase                                                 | Protein coding | 44 | GC09P137013 | 3.123105764 | https://www.genecards.org/cgi-bin/carddisp.pl?gene=PTGDS    |
| RYR2     | Ryanodine Receptor 2                                                      | Protein coding | 48 | GC01P237042 | 3.123040676 | https://www.genecards.org/cgi-bin/carddisp.pl?gene=RYR2     |
| CIITA    | Class II Major Histocompatibility Complex Transactivator                  | Protein coding | 45 | GC16P010879 | 3.121751547 | https://www.genecards.org/cgi-bin/carddisp.pl?gene=CIITA    |
| MTTP     | Microsomal Triglyceride Transfer Protein                                  | Protein coding | 45 | GC04P099563 | 3.120309114 | https://www.genecards.org/cgi-bin/carddisp.pl?gene=MTTP     |
| GSTT1    | Glutathione S-Transferase $\theta$ 1                                      | Protein coding | 33 | GC22Mi00270 | 3.11806488  | https://www.genecards.org/cgi-bin/carddisp.pl?gene=GSTT1    |
| PLA2G2A  | Phospholipase A2 Group IIA                                                | Protein coding | 47 | GC01M019975 | 3.114442348 | https://www.genecards.org/cgi-bin/carddisp.pl?gene=PLA2G2A  |
| PSMA6    | Proteasome 20S Subunit $\alpha$ 6                                         | Protein coding | 46 | GC14P035278 | 3.110429764 | https://www.genecards.org/cgi-bin/carddisp.pl?gene=PSMA6    |
| CDH11    | Cadherin 11                                                               | Protein coding | 47 | GC16M064943 | 3.107358932 | https://www.genecards.org/cgi-bin/carddisp.pl?gene=CDH11    |
| ATP1A3   | ATPase Na <sup>+</sup> /K <sup>+</sup> Transporting Subunit $\alpha$ 3    | Protein coding | 48 | GC19M041966 | 3.105328083 | https://www.genecards.org/cgi-bin/carddisp.pl?gene=ATP1A3   |
| AFG3L2   | AFG3 Like Matrix AAA Peptidase Subunit 2                                  | Protein coding | 44 | GC18M012328 | 3.102565527 | https://www.genecards.org/cgi-bin/carddisp.pl?gene=AFG3L2   |
| CYBB     | Cytochrome B-245 $\beta$ Chain                                            | Protein coding | 47 | GC0XP037780 | 3.101630688 | https://www.genecards.org/cgi-bin/carddisp.pl?gene=CYBB     |
| ABCG8    | ATP Binding Cassette Subfamily G Member 8                                 | Protein coding | 43 | GC02P043828 | 3.10146594  | https://www.genecards.org/cgi-bin/carddisp.pl?gene=ABCG8    |
| EGR1     | Early Growth Response 1                                                   | Protein coding | 43 | GC05P138465 | 3.095691204 | https://www.genecards.org/cgi-bin/carddisp.pl?gene=EGR1     |
| P2RY1    | Purinergic Receptor P2Y1                                                  | Protein coding | 46 | GC03P152835 | 3.089677334 | https://www.genecards.org/cgi-bin/carddisp.pl?gene=P2RY1    |
| SCN8A    | Sodium Voltage-Gated Channel $\alpha$ Subunit 8                           | Protein coding | 47 | GC12P051590 | 3.089550018 | https://www.genecards.org/cgi-bin/carddisp.pl?gene=SCN8A    |
| SLCO1B1  | Solute Carrier Organic Anion Transporter Family Member 1B1                | Protein coding | 48 | GC12P021132 | 3.073178291 | https://www.genecards.org/cgi-bin/carddisp.pl?gene=SLCO1B1  |
| TNFSF11  | TNF Superfamily Member 11                                                 | Protein coding | 47 | GC13P042562 | 3.071291447 | https://www.genecards.org/cgi-bin/carddisp.pl?gene=TNFSF11  |
| PTHLH    | Parathyroid Hormone Like Hormone                                          | Protein coding | 45 | GC12M027959 | 3.068457127 | https://www.genecards.org/cgi-bin/carddisp.pl?gene=PTHLH    |
| PMM1     | Phosphomannomutase 1                                                      | Protein coding | 40 | GC22M041576 | 3.067127705 | https://www.genecards.org/cgi-bin/carddisp.pl?gene=PMM1     |
| CHGA     | Chromogranin A                                                            | Protein coding | 42 | GC14P092929 | 3.065340519 | https://www.genecards.org/cgi-bin/carddisp.pl?gene=CHGA     |

|            |                                                                   |                   |    |             |             |                                                                                                                                           |
|------------|-------------------------------------------------------------------|-------------------|----|-------------|-------------|-------------------------------------------------------------------------------------------------------------------------------------------|
| MIR134     | MicroRNA 134                                                      | RNA gene          | 19 | GC14P106797 | 3.064644337 | <a href="https://www.genecards.org/cgi-bin/carddisp.pl?gene=MIR134">https://www.genecards.org/cgi-bin/carddisp.pl?gene=MIR134</a>         |
| PDGFB      | Platelet Derived Growth Factor Subunit B                          | Protein coding    | 49 | GC22M050295 | 3.050550461 | <a href="https://www.genecards.org/cgi-bin/carddisp.pl?gene=PDGFB">https://www.genecards.org/cgi-bin/carddisp.pl?gene=PDGFB</a>           |
| SQSTM1     | Sequestosome 1                                                    | Protein coding    | 48 | GC05P179806 | 3.050289154 | <a href="https://www.genecards.org/cgi-bin/carddisp.pl?gene=SQSTM1">https://www.genecards.org/cgi-bin/carddisp.pl?gene=SQSTM1</a>         |
| TRPV1      | Transient Receptor Potential Cation Channel Subfamily V Member 1  | Protein coding    | 46 | GC17M003565 | 3.045722008 | <a href="https://www.genecards.org/cgi-bin/carddisp.pl?gene=TRPV1">https://www.genecards.org/cgi-bin/carddisp.pl?gene=TRPV1</a>           |
| OPRM1      | Opioid Receptor $\mu$ 1                                           | Protein coding    | 48 | GC06P154075 | 3.035374403 | <a href="https://www.genecards.org/cgi-bin/carddisp.pl?gene=OPRM1">https://www.genecards.org/cgi-bin/carddisp.pl?gene=OPRM1</a>           |
| NOX4       | NADPH Oxidase 4                                                   | Protein coding    | 42 | GC11M089324 | 3.035027266 | <a href="https://www.genecards.org/cgi-bin/carddisp.pl?gene=NOX4">https://www.genecards.org/cgi-bin/carddisp.pl?gene=NOX4</a>             |
| BAX        | BCL2 Associated X, Apoptosis Regulator                            | Protein coding    | 48 | GC19P048954 | 3.030854702 | <a href="https://www.genecards.org/cgi-bin/carddisp.pl?gene=BAX">https://www.genecards.org/cgi-bin/carddisp.pl?gene=BAX</a>               |
| PTPN1      | Protein Tyrosine Phosphatase Non-Receptor Type 1                  | Protein coding    | 50 | GC20P050510 | 3.030286312 | <a href="https://www.genecards.org/cgi-bin/carddisp.pl?gene=PTPN1">https://www.genecards.org/cgi-bin/carddisp.pl?gene=PTPN1</a>           |
| TRIM2      | Tripartite Motif Containing 2                                     | Protein coding    | 41 | GC04P153152 | 3.029047012 | <a href="https://www.genecards.org/cgi-bin/carddisp.pl?gene=TRIM2">https://www.genecards.org/cgi-bin/carddisp.pl?gene=TRIM2</a>           |
| MME        | Membrane Metalloendopeptidase                                     | Protein coding    | 50 | GC03P155024 | 3.027881145 | <a href="https://www.genecards.org/cgi-bin/carddisp.pl?gene=MME">https://www.genecards.org/cgi-bin/carddisp.pl?gene=MME</a>               |
| CCK        | Cholecystokinin                                                   | Protein coding    | 42 | GC03M042274 | 3.027450323 | <a href="https://www.genecards.org/cgi-bin/carddisp.pl?gene=CCK">https://www.genecards.org/cgi-bin/carddisp.pl?gene=CCK</a>               |
| AKR1B1     | Aldo-Keto Reductase Family 1 Member B                             | Protein coding    | 47 | GC07M134442 | 3.021580219 | <a href="https://www.genecards.org/cgi-bin/carddisp.pl?gene=AKR1B1">https://www.genecards.org/cgi-bin/carddisp.pl?gene=AKR1B1</a>         |
| SOD3       | Superoxide Dismutase 3                                            | Protein coding    | 41 | GC04P024798 | 3.018280029 | <a href="https://www.genecards.org/cgi-bin/carddisp.pl?gene=SOD3">https://www.genecards.org/cgi-bin/carddisp.pl?gene=SOD3</a>             |
| SELENOS    | Selenoprotein S                                                   | Protein coding    | 31 | GC15M108722 | 3.017411232 | <a href="https://www.genecards.org/cgi-bin/carddisp.pl?gene=SELENOS">https://www.genecards.org/cgi-bin/carddisp.pl?gene=SELENOS</a>       |
| ABCG1      | ATP Binding Cassette Subfamily G Member 1                         | Protein coding    | 44 | GC21P042199 | 3.017077446 | <a href="https://www.genecards.org/cgi-bin/carddisp.pl?gene=ABCG1">https://www.genecards.org/cgi-bin/carddisp.pl?gene=ABCG1</a>           |
| KIAA0319L  | KIAA0319 Like                                                     | Protein coding    | 37 | GC01M035433 | 3.015804768 | <a href="https://www.genecards.org/cgi-bin/carddisp.pl?gene=KIAA0319L">https://www.genecards.org/cgi-bin/carddisp.pl?gene=KIAA0319L</a>   |
| LTB        | Lymphotoxin $\beta$                                               | Protein coding    | 40 | GC06M049117 | 3.012680769 | <a href="https://www.genecards.org/cgi-bin/carddisp.pl?gene=LTB">https://www.genecards.org/cgi-bin/carddisp.pl?gene=LTB</a>               |
| TRPM7      | Transient Receptor Potential Cation Channel Subfamily M Member 7  | Protein coding    | 45 | GC15M050552 | 3.009033442 | <a href="https://www.genecards.org/cgi-bin/carddisp.pl?gene=TRPM7">https://www.genecards.org/cgi-bin/carddisp.pl?gene=TRPM7</a>           |
| IFNA1      | Interferon $\alpha$ 1                                             | Protein coding    | 39 | GC09P021532 | 3.008667469 | <a href="https://www.genecards.org/cgi-bin/carddisp.pl?gene=IFNA1">https://www.genecards.org/cgi-bin/carddisp.pl?gene=IFNA1</a>           |
| DLL3       | $\delta$ Like Canonical Notch Ligand 3                            | Protein coding    | 41 | GC19P039498 | 3.008014202 | <a href="https://www.genecards.org/cgi-bin/carddisp.pl?gene=DLL3">https://www.genecards.org/cgi-bin/carddisp.pl?gene=DLL3</a>             |
| SRRT       | Serrate, RNA Effector Molecule                                    | Protein coding    | 38 | GC07P100875 | 3.008014202 | <a href="https://www.genecards.org/cgi-bin/carddisp.pl?gene=SRRT">https://www.genecards.org/cgi-bin/carddisp.pl?gene=SRRT</a>             |
| CALM1      | Calmodulin 1                                                      | Protein coding    | 45 | GC14P090396 | 3.006863594 | <a href="https://www.genecards.org/cgi-bin/carddisp.pl?gene=CALM1">https://www.genecards.org/cgi-bin/carddisp.pl?gene=CALM1</a>           |
| STAT5A     | Signal Transducer And Activator Of Transcription 5A               | Protein coding    | 46 | GC17P042287 | 3.006483793 | <a href="https://www.genecards.org/cgi-bin/carddisp.pl?gene=STAT5A">https://www.genecards.org/cgi-bin/carddisp.pl?gene=STAT5A</a>         |
| STIN2-VNTR | Serotonin Transporter Intronic VNTR Enhancer                      | Biological region | 1  | GC17P030221 | 3.003309011 | <a href="https://www.genecards.org/cgi-bin/carddisp.pl?gene=STIN2-VNTR">https://www.genecards.org/cgi-bin/carddisp.pl?gene=STIN2-VNTR</a> |
| RUNX2      | RUNX Family Transcription Factor 2                                | Protein coding    | 48 | GC06P058536 | 3.003157616 | <a href="https://www.genecards.org/cgi-bin/carddisp.pl?gene=RUNX2">https://www.genecards.org/cgi-bin/carddisp.pl?gene=RUNX2</a>           |
| ABCC1      | ATP Binding Cassette Subfamily C Member 1                         | Protein coding    | 49 | GC16P015949 | 3.001239061 | <a href="https://www.genecards.org/cgi-bin/carddisp.pl?gene=ABCC1">https://www.genecards.org/cgi-bin/carddisp.pl?gene=ABCC1</a>           |
| GRM7       | Glutamate Metabotropic Receptor 7                                 | Protein coding    | 47 | GC03P006770 | 3.001124144 | <a href="https://www.genecards.org/cgi-bin/carddisp.pl?gene=GRM7">https://www.genecards.org/cgi-bin/carddisp.pl?gene=GRM7</a>             |
| DBH        | Dopamine $\beta$ -Hydroxylase                                     | Protein coding    | 50 | GC09P133636 | 2.998775244 | <a href="https://www.genecards.org/cgi-bin/carddisp.pl?gene=DBH">https://www.genecards.org/cgi-bin/carddisp.pl?gene=DBH</a>               |
| CX3CL1     | C-X3-C Motif Chemokine Ligand 1                                   | Protein coding    | 41 | GC16P057372 | 2.994762421 | <a href="https://www.genecards.org/cgi-bin/carddisp.pl?gene=CX3CL1">https://www.genecards.org/cgi-bin/carddisp.pl?gene=CX3CL1</a>         |
| IL12A      | Interleukin 12A                                                   | Protein coding    | 43 | GC03P159988 | 2.993739605 | <a href="https://www.genecards.org/cgi-bin/carddisp.pl?gene=IL12A">https://www.genecards.org/cgi-bin/carddisp.pl?gene=IL12A</a>           |
| CASP8      | Caspase 8                                                         | Protein coding    | 52 | GC02P201233 | 2.992638111 | <a href="https://www.genecards.org/cgi-bin/carddisp.pl?gene=CASP8">https://www.genecards.org/cgi-bin/carddisp.pl?gene=CASP8</a>           |
| GRM1       | Glutamate Metabotropic Receptor 1                                 | Protein coding    | 51 | GC06P145973 | 2.991319418 | <a href="https://www.genecards.org/cgi-bin/carddisp.pl?gene=GRM1">https://www.genecards.org/cgi-bin/carddisp.pl?gene=GRM1</a>             |
| IL2RA      | Interleukin 2 Receptor Subunit $\alpha$                           | Protein coding    | 50 | GC10M006010 | 2.988510847 | <a href="https://www.genecards.org/cgi-bin/carddisp.pl?gene=IL2RA">https://www.genecards.org/cgi-bin/carddisp.pl?gene=IL2RA</a>           |
| PSEN2      | Presenilin 2                                                      | Protein coding    | 50 | GC01P226870 | 2.986310005 | <a href="https://www.genecards.org/cgi-bin/carddisp.pl?gene=PSEN2">https://www.genecards.org/cgi-bin/carddisp.pl?gene=PSEN2</a>           |
| PLOD1      | Procollagen-Lysine,2-Oxoglutarate 5-Dioxygenase 1                 | Protein coding    | 42 | GC01P011934 | 2.985775471 | <a href="https://www.genecards.org/cgi-bin/carddisp.pl?gene=PLOD1">https://www.genecards.org/cgi-bin/carddisp.pl?gene=PLOD1</a>           |
| UGT1A1     | UDP Glucuronosyltransferase Family 1 Member A1                    | Protein coding    | 48 | GC02P233760 | 2.983431339 | <a href="https://www.genecards.org/cgi-bin/carddisp.pl?gene=UGT1A1">https://www.genecards.org/cgi-bin/carddisp.pl?gene=UGT1A1</a>         |
| FOLH1      | Folate Hydrolase 1                                                | Protein coding    | 47 | GC11M071265 | 2.982842207 | <a href="https://www.genecards.org/cgi-bin/carddisp.pl?gene=FOLH1">https://www.genecards.org/cgi-bin/carddisp.pl?gene=FOLH1</a>           |
| ADH1C      | Alcohol Dehydrogenase 1C (Class I), $\gamma$ Polypeptide          | Protein coding    | 42 | GC04M099336 | 2.978156567 | <a href="https://www.genecards.org/cgi-bin/carddisp.pl?gene=ADH1C">https://www.genecards.org/cgi-bin/carddisp.pl?gene=ADH1C</a>           |
| LTA4H      | Leukotriene A4 Hydrolase                                          | Protein coding    | 45 | GC12M096000 | 2.977104664 | <a href="https://www.genecards.org/cgi-bin/carddisp.pl?gene=LTA4H">https://www.genecards.org/cgi-bin/carddisp.pl?gene=LTA4H</a>           |
| HEY1       | Hes Related Family BHLH Transcription Factor With YRPW Motif 1    | Protein coding    | 43 | GC08M079764 | 2.974816799 | <a href="https://www.genecards.org/cgi-bin/carddisp.pl?gene=HEY1">https://www.genecards.org/cgi-bin/carddisp.pl?gene=HEY1</a>             |
| JAG2       | Jagged Canonical Notch Ligand 2                                   | Protein coding    | 42 | GC14M105140 | 2.974816799 | <a href="https://www.genecards.org/cgi-bin/carddisp.pl?gene=JAG2">https://www.genecards.org/cgi-bin/carddisp.pl?gene=JAG2</a>             |
| HEYL       | Hes Related Family BHLH Transcription Factor With YRPW Motif Like | Protein coding    | 39 | GC01M039623 | 2.974816799 | <a href="https://www.genecards.org/cgi-bin/carddisp.pl?gene=HEYL">https://www.genecards.org/cgi-bin/carddisp.pl?gene=HEYL</a>             |
| CYP2D6     | Cytochrome P450 Family 2 Subfamily D Member 6                     | Protein coding    | 48 | GC22M042126 | 2.971186876 | <a href="https://www.genecards.org/cgi-bin/carddisp.pl?gene=CYP2D6">https://www.genecards.org/cgi-bin/carddisp.pl?gene=CYP2D6</a>         |
| EPHB4      | EPH Receptor B4                                                   | Protein coding    | 51 | GC07M100803 | 2.968825817 | <a href="https://www.genecards.org/cgi-bin/carddisp.pl?gene=EPHB4">https://www.genecards.org/cgi-bin/carddisp.pl?gene=EPHB4</a>           |
| EP300      | E1A Binding Protein P300                                          | Protein coding    | 51 | GC22P041091 | 2.967563152 | <a href="https://www.genecards.org/cgi-bin/carddisp.pl?gene=EP300">https://www.genecards.org/cgi-bin/carddisp.pl?gene=EP300</a>           |
| IFIH1      | Interferon Induced With Helicase C Domain 1                       | Protein coding    | 47 | GC02M162267 | 2.957386971 | <a href="https://www.genecards.org/cgi-bin/carddisp.pl?gene=IFIH1">https://www.genecards.org/cgi-bin/carddisp.pl?gene=IFIH1</a>           |
| MMP13      | Matrix Metallopeptidase 13                                        | Protein coding    | 50 | GC11M102942 | 2.954930305 | <a href="https://www.genecards.org/cgi-bin/carddisp.pl?gene=MMP13">https://www.genecards.org/cgi-bin/carddisp.pl?gene=MMP13</a>           |
| MIR34A     | MicroRNA 34a                                                      | RNA gene          | 23 | GC01M009151 | 2.950960159 | <a href="https://www.genecards.org/cgi-bin/carddisp.pl?gene=MIR34A">https://www.genecards.org/cgi-bin/carddisp.pl?gene=MIR34A</a>         |
| MTRR       | 5-Methyltetrahydrofolate-Homocysteine Methyltransferase Reductase | Protein coding    | 43 | GC05P007851 | 2.949322701 | <a href="https://www.genecards.org/cgi-bin/carddisp.pl?gene=MTRR">https://www.genecards.org/cgi-bin/carddisp.pl?gene=MTRR</a>             |
| CELF2      | CUGBP Elav-Like Family Member 2                                   | Protein coding    | 42 | GC10P010462 | 2.947994947 | <a href="https://www.genecards.org/cgi-bin/carddisp.pl?gene=CELF2">https://www.genecards.org/cgi-bin/carddisp.pl?gene=CELF2</a>           |
| NAGLU      | N-Acetyl- $\alpha$ -Glucosaminidase                               | Protein coding    | 42 | GC17P042543 | 2.943696499 | <a href="https://www.genecards.org/cgi-bin/carddisp.pl?gene=NAGLU">https://www.genecards.org/cgi-bin/carddisp.pl?gene=NAGLU</a>           |
| MUC1       | Mucin 1, Cell Surface Associated                                  | Protein coding    | 47 | GC01M155185 | 2.938732624 | <a href="https://www.genecards.org/cgi-bin/carddisp.pl?gene=MUC1">https://www.genecards.org/cgi-bin/carddisp.pl?gene=MUC1</a>             |
| CHRNA7     | Cholinergic Receptor Nicotinic $\alpha$ 7 Subunit                 | Protein coding    | 45 | GC15P031923 | 2.937201738 | <a href="https://www.genecards.org/cgi-bin/carddisp.pl?gene=CHRNA7">https://www.genecards.org/cgi-bin/carddisp.pl?gene=CHRNA7</a>         |
| CACNA1A    | Calcium Voltage-Gated Channel Subunit $\alpha$ 1 A                | Protein coding    | 47 | GC19M013206 | 2.937168598 | <a href="https://www.genecards.org/cgi-bin/carddisp.pl?gene=CACNA1A">https://www.genecards.org/cgi-bin/carddisp.pl?gene=CACNA1A</a>       |
| PATJ       | PATJ Crumbs Cell Polarity Complex Component                       | Protein coding    | 31 | GC01P061743 | 2.936070442 | <a href="https://www.genecards.org/cgi-bin/carddisp.pl?gene=PATJ">https://www.genecards.org/cgi-bin/carddisp.pl?gene=PATJ</a>             |
| MYT1L      | Myelin Transcription Factor 1 Like                                | Protein coding    | 41 | GC02M001789 | 2.93124032  | <a href="https://www.genecards.org/cgi-bin/carddisp.pl?gene=MYT1L">https://www.genecards.org/cgi-bin/carddisp.pl?gene=MYT1L</a>           |
| MIR140     | MicroRNA 140                                                      | RNA gene          | 22 | GC16P069934 | 2.926820278 | <a href="https://www.genecards.org/cgi-bin/carddisp.pl?gene=MIR140">https://www.genecards.org/cgi-bin/carddisp.pl?gene=MIR140</a>         |
| ADRA2A     | Adrenoceptor $\alpha$ 2A                                          | Protein coding    | 47 | GC10P111077 | 2.925698519 | <a href="https://www.genecards.org/cgi-bin/carddisp.pl?gene=ADRA2A">https://www.genecards.org/cgi-bin/carddisp.pl?gene=ADRA2A</a>         |
| DENND11    | DENN Domain Containing 11                                         | Protein coding    | 25 | GC07M141656 | 2.924808741 | <a href="https://www.genecards.org/cgi-bin/carddisp.pl?gene=DENND11">https://www.genecards.org/cgi-bin/carddisp.pl?gene=DENND11</a>       |
| SAA1       | Serum Amyloid A1                                                  | Protein coding    | 41 | GC11P018267 | 2.924681902 | <a href="https://www.genecards.org/cgi-bin/carddisp.pl?gene=SAA1">https://www.genecards.org/cgi-bin/carddisp.pl?gene=SAA1</a>             |
| PTGES      | Prostaglandin E Synthase                                          | Protein coding    | 41 | GC09M129738 | 2.918799877 | <a href="https://www.genecards.org/cgi-bin/carddisp.pl?gene=PTGES">https://www.genecards.org/cgi-bin/carddisp.pl?gene=PTGES</a>           |
| DYRK1A     | Dual Specificity Tyrosine Phosphorylation Regulated Kinase 1A     | Protein coding    | 50 | GC21P037365 | 2.916493177 | <a href="https://www.genecards.org/cgi-bin/carddisp.pl?gene=DYRK1A">https://www.genecards.org/cgi-bin/carddisp.pl?gene=DYRK1A</a>         |
| MIR221     | MicroRNA 221                                                      | RNA gene          | 21 | GC0XM045746 | 2.916249275 | <a href="https://www.genecards.org/cgi-bin/carddisp.pl?gene=MIR221">https://www.genecards.org/cgi-bin/carddisp.pl?gene=MIR221</a>         |
| CDH4       | Cadherin 4                                                        | Protein coding    | 42 | GC20P061252 | 2.914408445 | <a href="https://www.genecards.org/cgi-bin/carddisp.pl?gene=CDH4">https://www.genecards.org/cgi-bin/carddisp.pl?gene=CDH4</a>             |
| MMRN1      | Multimerin 1                                                      | Protein coding    | 40 | GC04P089879 | 2.912666321 | <a href="https://www.genecards.org/cgi-bin/carddisp.pl?gene=MMRN1">https://www.genecards.org/cgi-bin/carddisp.pl?gene=MMRN1</a>           |
| SLC2A3     | Solute Carrier Family 2 Member 3                                  | Protein coding    | 48 | GC12M007919 | 2.912596703 | <a href="https://www.genecards.org/cgi-bin/carddisp.pl?gene=SLC2A3">https://www.genecards.org/cgi-bin/carddisp.pl?gene=SLC2A3</a>         |
| MIR124-1   | MicroRNA 124-1                                                    | RNA gene          | 22 | GC08M009903 | 2.907217741 | <a href="https://www.genecards.org/cgi-bin/carddisp.pl?gene=MIR124-1">https://www.genecards.org/cgi-bin/carddisp.pl?gene=MIR124-1</a>     |
| GAS6       | Growth Arrest Specific 6                                          | Protein coding    | 44 | GC13M113820 | 2.906847715 | <a href="https://www.genecards.org/cgi-bin/carddisp.pl?gene=GAS6">https://www.genecards.org/cgi-bin/carddisp.pl?gene=GAS6</a>             |
| HNF1B      | HNF1 Homeobox B                                                   | Protein coding    | 44 | GC17M037686 | 2.904248238 | <a href="https://www.genecards.org/cgi-bin/carddisp.pl?gene=HNF1B">https://www.genecards.org/cgi-bin/carddisp.pl?gene=HNF1B</a>           |
| TNXB       | Tenascin XB                                                       | Protein coding    | 44 | GC06M049135 | 2.903488636 | <a href="https://www.genecards.org/cgi-bin/carddisp.pl?gene=TNXB">https://www.genecards.org/cgi-bin/carddisp.pl?gene=TNXB</a>             |
| BCHE       | Butyrylcholinesterase                                             | Protein coding    | 48 | GC03M165772 | 2.90081501  | <a href="https://www.genecards.org/cgi-bin/carddisp.pl?gene=BCHE">https://www.genecards.org/cgi-bin/carddisp.pl?gene=BCHE</a>             |
| APEX1      | Apurinic/Apyrimidinic Endodeoxyribonuclease 1                     | Protein coding    | 44 | GC14P020455 | 2.900336742 | <a href="https://www.genecards.org/cgi-bin/carddisp.pl?gene=APEX1">https://www.genecards.org/cgi-bin/carddisp.pl?gene=APEX1</a>           |
| MAOA       | Monoamine Oxidase A                                               | Protein coding    | 50 | GC0XP043654 | 2.894194126 | <a href="https://www.genecards.org/cgi-bin/carddisp.pl?gene=MAOA">https://www.genecards.org/cgi-bin/carddisp.pl?gene=MAOA</a>             |
| NDUFC2     | NADH:Ubiquinone Oxidoreductase Subunit C2                         | Protein coding    | 41 | GC11M078068 | 2.892429829 | <a href="https://www.genecards.org/cgi-bin/carddisp.pl?gene=NDUFC2">https://www.genecards.org/cgi-bin/carddisp.pl?gene=NDUFC2</a>         |
| SREBF2     | Sterol Regulatory Element Binding Transcription Factor 2          | Protein coding    | 43 | GC22P041833 | 2.886911392 | <a href="https://www.genecards.org/cgi-bin/carddisp.pl?gene=SREBF2">https://www.genecards.org/cgi-bin/carddisp.pl?gene=SREBF2</a>         |
| COL1A2     | Collagen Type 1 $\alpha$ 2 Chain                                  | Protein coding    | 47 | GC07P094394 | 2.88596344  | <a href="https://www.genecards.org/cgi-bin/carddisp.pl?gene=COL1A2">https://www.genecards.org/cgi-bin/carddisp.pl?gene=COL1A2</a>         |

|           |                                                                        |                |    |             |             |                                                                                                                                         |
|-----------|------------------------------------------------------------------------|----------------|----|-------------|-------------|-----------------------------------------------------------------------------------------------------------------------------------------|
| ZC3HC1    | Zinc Finger C3HC-Type Containing 1                                     | Protein coding | 37 | GC07M130026 | 2.884869099 | <a href="https://www.genecards.org/cgi-bin/carddisp.pl?gene=ZC3HC1">https://www.genecards.org/cgi-bin/carddisp.pl?gene=ZC3HC1</a>       |
| BECN1     | Beclin 1                                                               | Protein coding | 45 | GC17M042810 | 2.884428024 | <a href="https://www.genecards.org/cgi-bin/carddisp.pl?gene=BECN1">https://www.genecards.org/cgi-bin/carddisp.pl?gene=BECN1</a>         |
| BMPRI1A   | Bone Morphogenetic Protein Receptor Type 1A                            | Protein coding | 50 | GC10P086756 | 2.882528305 | <a href="https://www.genecards.org/cgi-bin/carddisp.pl?gene=BMPRI1A">https://www.genecards.org/cgi-bin/carddisp.pl?gene=BMPRI1A</a>     |
| HSD11B1   | Hydroxysteroid 11-β Dehydrogenase 1                                    | Protein coding | 50 | GC01P209686 | 2.878652573 | <a href="https://www.genecards.org/cgi-bin/carddisp.pl?gene=HSD11B1">https://www.genecards.org/cgi-bin/carddisp.pl?gene=HSD11B1</a>     |
| RUVBL2    | RuvB Like AAA ATPase 2                                                 | Protein coding | 44 | GC19P048993 | 2.874909878 | <a href="https://www.genecards.org/cgi-bin/carddisp.pl?gene=RUVBL2">https://www.genecards.org/cgi-bin/carddisp.pl?gene=RUVBL2</a>       |
| LLGL2     | LLGL Scribble Cell Polarity Complex Component 2                        | Protein coding | 40 | GC17P075525 | 2.874909878 | <a href="https://www.genecards.org/cgi-bin/carddisp.pl?gene=LLGL2">https://www.genecards.org/cgi-bin/carddisp.pl?gene=LLGL2</a>         |
| APLN      | Apelin                                                                 | Protein coding | 37 | GC0XM129645 | 2.872885227 | <a href="https://www.genecards.org/cgi-bin/carddisp.pl?gene=APLN">https://www.genecards.org/cgi-bin/carddisp.pl?gene=APLN</a>           |
| GRIA2     | Glutamate Ionotropic Receptor AMPA Type Subunit 2                      | Protein coding | 50 | GC04P157204 | 2.871995926 | <a href="https://www.genecards.org/cgi-bin/carddisp.pl?gene=GRIA2">https://www.genecards.org/cgi-bin/carddisp.pl?gene=GRIA2</a>         |
| MIR125B1  | MicroRNA 125b-1                                                        | RNA gene       | 22 | GC11M122100 | 2.863858223 | <a href="https://www.genecards.org/cgi-bin/carddisp.pl?gene=MIR125B1">https://www.genecards.org/cgi-bin/carddisp.pl?gene=MIR125B1</a>   |
| ERCC4     | ERCC Excision Repair 4, Endonuclease Catalytic Subunit                 | Protein coding | 45 | GC16P013920 | 2.863517761 | <a href="https://www.genecards.org/cgi-bin/carddisp.pl?gene=ERCC4">https://www.genecards.org/cgi-bin/carddisp.pl?gene=ERCC4</a>         |
| MYC       | MYC Proto-Oncogene, BHLH Transcription Factor                          | Protein coding | 51 | GC08P127735 | 2.862642288 | <a href="https://www.genecards.org/cgi-bin/carddisp.pl?gene=MYC">https://www.genecards.org/cgi-bin/carddisp.pl?gene=MYC</a>             |
| SLC8A1    | Solute Carrier Family 8 Member A1                                      | Protein coding | 45 | GC02M040078 | 2.862523079 | <a href="https://www.genecards.org/cgi-bin/carddisp.pl?gene=SLC8A1">https://www.genecards.org/cgi-bin/carddisp.pl?gene=SLC8A1</a>       |
| PSAP      | Prosaposin                                                             | Protein coding | 46 | GC10M071816 | 2.861062765 | <a href="https://www.genecards.org/cgi-bin/carddisp.pl?gene=PSAP">https://www.genecards.org/cgi-bin/carddisp.pl?gene=PSAP</a>           |
| CALCRL    | Calcitonin Receptor Like Receptor                                      | Protein coding | 45 | GC02M187341 | 2.858897209 | <a href="https://www.genecards.org/cgi-bin/carddisp.pl?gene=CALCRL">https://www.genecards.org/cgi-bin/carddisp.pl?gene=CALCRL</a>       |
| SP1       | Sp1 Transcription Factor                                               | Protein coding | 44 | GC12P053380 | 2.851135731 | <a href="https://www.genecards.org/cgi-bin/carddisp.pl?gene=SP1">https://www.genecards.org/cgi-bin/carddisp.pl?gene=SP1</a>             |
| MIR125A   | MicroRNA 125a                                                          | RNA gene       | 22 | GC19P051720 | 2.849973202 | <a href="https://www.genecards.org/cgi-bin/carddisp.pl?gene=MIR125A">https://www.genecards.org/cgi-bin/carddisp.pl?gene=MIR125A</a>     |
| ALKBH8    | AlkB Homolog 8, TRNA Methyltransferase                                 | Protein coding | 37 | GC11M107502 | 2.842199564 | <a href="https://www.genecards.org/cgi-bin/carddisp.pl?gene=ALKBH8">https://www.genecards.org/cgi-bin/carddisp.pl?gene=ALKBH8</a>       |
| CD28      | CD28 Molecule                                                          | Protein coding | 46 | GC02P203706 | 2.841977596 | <a href="https://www.genecards.org/cgi-bin/carddisp.pl?gene=CD28">https://www.genecards.org/cgi-bin/carddisp.pl?gene=CD28</a>           |
| IDH1      | Isocitrate Dehydrogenase (NADP(+)) 1                                   | Protein coding | 52 | GC02M208236 | 2.83890152  | <a href="https://www.genecards.org/cgi-bin/carddisp.pl?gene=IDH1">https://www.genecards.org/cgi-bin/carddisp.pl?gene=IDH1</a>           |
| CD177     | CD177 Molecule                                                         | Protein coding | 38 | GC19P043353 | 2.837999344 | <a href="https://www.genecards.org/cgi-bin/carddisp.pl?gene=CD177">https://www.genecards.org/cgi-bin/carddisp.pl?gene=CD177</a>         |
| IGF2      | Insulin Like Growth Factor 2                                           | Protein coding | 47 | GC11M002130 | 2.834954739 | <a href="https://www.genecards.org/cgi-bin/carddisp.pl?gene=IGF2">https://www.genecards.org/cgi-bin/carddisp.pl?gene=IGF2</a>           |
| ASIC3     | Acid Sensing Ion Channel Subunit 3                                     | Protein coding | 39 | GC07P151048 | 2.834653616 | <a href="https://www.genecards.org/cgi-bin/carddisp.pl?gene=ASIC3">https://www.genecards.org/cgi-bin/carddisp.pl?gene=ASIC3</a>         |
| KCNN4     | Potassium Calcium-Activated Channel Subfamily N Member 4               | Protein coding | 48 | GC19M048587 | 2.833781719 | <a href="https://www.genecards.org/cgi-bin/carddisp.pl?gene=KCNN4">https://www.genecards.org/cgi-bin/carddisp.pl?gene=KCNN4</a>         |
| GSTO1     | Glutathione S-Transferase α 1                                          | Protein coding | 44 | GC10P104235 | 2.832417011 | <a href="https://www.genecards.org/cgi-bin/carddisp.pl?gene=GSTO1">https://www.genecards.org/cgi-bin/carddisp.pl?gene=GSTO1</a>         |
| TNFSF10   | TNF Superfamily Member 10                                              | Protein coding | 45 | GC03M172505 | 2.83225584  | <a href="https://www.genecards.org/cgi-bin/carddisp.pl?gene=TNFSF10">https://www.genecards.org/cgi-bin/carddisp.pl?gene=TNFSF10</a>     |
| LGALS2    | Galectin 2                                                             | Protein coding | 41 | GC22M037570 | 2.832134247 | <a href="https://www.genecards.org/cgi-bin/carddisp.pl?gene=LGALS2">https://www.genecards.org/cgi-bin/carddisp.pl?gene=LGALS2</a>       |
| CALB1     | Calbindin 1                                                            | Protein coding | 41 | GC08M090058 | 2.828175545 | <a href="https://www.genecards.org/cgi-bin/carddisp.pl?gene=CALB1">https://www.genecards.org/cgi-bin/carddisp.pl?gene=CALB1</a>         |
| MIR142    | MicroRNA 142                                                           | RNA gene       | 20 | GC17M058331 | 2.824404001 | <a href="https://www.genecards.org/cgi-bin/carddisp.pl?gene=MIR142">https://www.genecards.org/cgi-bin/carddisp.pl?gene=MIR142</a>       |
| C19orf12  | Chromosome 19 Open Reading Frame 12                                    | Protein coding | 36 | GC19M029699 | 2.823279142 | <a href="https://www.genecards.org/cgi-bin/carddisp.pl?gene=C19orf12">https://www.genecards.org/cgi-bin/carddisp.pl?gene=C19orf12</a>   |
| S1PR1     | Sphingosine-1-Phosphate Receptor 1                                     | Protein coding | 44 | GC01P101236 | 2.818180084 | <a href="https://www.genecards.org/cgi-bin/carddisp.pl?gene=S1PR1">https://www.genecards.org/cgi-bin/carddisp.pl?gene=S1PR1</a>         |
| ABCB7     | ATP Binding Cassette Subfamily B Member 7                              | Protein coding | 44 | GC0XM075053 | 2.815701485 | <a href="https://www.genecards.org/cgi-bin/carddisp.pl?gene=ABCB7">https://www.genecards.org/cgi-bin/carddisp.pl?gene=ABCB7</a>         |
| HRAS      | HRas Proto-Oncogene, GTPase                                            | Protein coding | 51 | GC11M001303 | 2.812121391 | <a href="https://www.genecards.org/cgi-bin/carddisp.pl?gene=HRAS">https://www.genecards.org/cgi-bin/carddisp.pl?gene=HRAS</a>           |
| HTT       | Huntingtin                                                             | Protein coding | 44 | GC04P003041 | 2.809645653 | <a href="https://www.genecards.org/cgi-bin/carddisp.pl?gene=HTT">https://www.genecards.org/cgi-bin/carddisp.pl?gene=HTT</a>             |
| CTSB      | Cathepsin B                                                            | Protein coding | 51 | GC08M011842 | 2.809618235 | <a href="https://www.genecards.org/cgi-bin/carddisp.pl?gene=CTSB">https://www.genecards.org/cgi-bin/carddisp.pl?gene=CTSB</a>           |
| CYP24A1   | Cytochrome P450 Family 24 Subfamily A Member 1                         | Protein coding | 47 | GC20M054153 | 2.805990934 | <a href="https://www.genecards.org/cgi-bin/carddisp.pl?gene=CYP24A1">https://www.genecards.org/cgi-bin/carddisp.pl?gene=CYP24A1</a>     |
| DEFA1     | Defensin α 1                                                           | Protein coding | 41 | GC08M006977 | 2.80259943  | <a href="https://www.genecards.org/cgi-bin/carddisp.pl?gene=DEFA1">https://www.genecards.org/cgi-bin/carddisp.pl?gene=DEFA1</a>         |
| ROS1      | ROS Proto-Oncogene 1, Receptor Tyrosine Kinase                         | Protein coding | 45 | GC06M117287 | 2.799934387 | <a href="https://www.genecards.org/cgi-bin/carddisp.pl?gene=ROS1">https://www.genecards.org/cgi-bin/carddisp.pl?gene=ROS1</a>           |
| MEF2D     | Myocyte Enhancer Factor 2D                                             | Protein coding | 44 | GC01M156463 | 2.79530406  | <a href="https://www.genecards.org/cgi-bin/carddisp.pl?gene=MEF2D">https://www.genecards.org/cgi-bin/carddisp.pl?gene=MEF2D</a>         |
| SIL1      | SIL1 Nucleotide Exchange Factor                                        | Protein coding | 40 | GC05M138957 | 2.79381156  | <a href="https://www.genecards.org/cgi-bin/carddisp.pl?gene=SIL1">https://www.genecards.org/cgi-bin/carddisp.pl?gene=SIL1</a>           |
| KCNMB1    | Potassium Calcium-Activated Channel Subfamily M Regulatory β Subunit 1 | Protein coding | 43 | GC05M170374 | 2.792865753 | <a href="https://www.genecards.org/cgi-bin/carddisp.pl?gene=KCNMB1">https://www.genecards.org/cgi-bin/carddisp.pl?gene=KCNMB1</a>       |
| CD4       | CD4 Molecule                                                           | Protein coding | 49 | GC12P006786 | 2.78975606  | <a href="https://www.genecards.org/cgi-bin/carddisp.pl?gene=CD4">https://www.genecards.org/cgi-bin/carddisp.pl?gene=CD4</a>             |
| DNAH11    | Dynein Axonemal Heavy Chain 11                                         | Protein coding | 42 | GC07P021543 | 2.786105633 | <a href="https://www.genecards.org/cgi-bin/carddisp.pl?gene=DNAH11">https://www.genecards.org/cgi-bin/carddisp.pl?gene=DNAH11</a>       |
| DDC       | Dopa Decarboxylase                                                     | Protein coding | 52 | GC07M050458 | 2.785496235 | <a href="https://www.genecards.org/cgi-bin/carddisp.pl?gene=DDC">https://www.genecards.org/cgi-bin/carddisp.pl?gene=DDC</a>             |
| EZH2      | Enhancer Of Zeste 2 Polycomb Repressive Complex 2 Subunit              | Protein coding | 54 | GC07M148807 | 2.781049013 | <a href="https://www.genecards.org/cgi-bin/carddisp.pl?gene=EZH2">https://www.genecards.org/cgi-bin/carddisp.pl?gene=EZH2</a>           |
| NTRK2     | Neurotrophic Receptor Tyrosine Kinase 2                                | Protein coding | 52 | GC09P084668 | 2.78010869  | <a href="https://www.genecards.org/cgi-bin/carddisp.pl?gene=NTRK2">https://www.genecards.org/cgi-bin/carddisp.pl?gene=NTRK2</a>         |
| H2AX      | H2A.X Variant Histone                                                  | Protein coding | 36 | GC11M119097 | 2.776882648 | <a href="https://www.genecards.org/cgi-bin/carddisp.pl?gene=H2AX">https://www.genecards.org/cgi-bin/carddisp.pl?gene=H2AX</a>           |
| STAT5B    | Signal Transducer And Activator Of Transcription 5B                    | Protein coding | 49 | GC17M042199 | 2.774267673 | <a href="https://www.genecards.org/cgi-bin/carddisp.pl?gene=STAT5B">https://www.genecards.org/cgi-bin/carddisp.pl?gene=STAT5B</a>       |
| PALLD     | Palladin, Cytoskeletal Associated Protein                              | Protein coding | 43 | GC04P168497 | 2.772378922 | <a href="https://www.genecards.org/cgi-bin/carddisp.pl?gene=PALLD">https://www.genecards.org/cgi-bin/carddisp.pl?gene=PALLD</a>         |
| VAMP8     | Vesicle Associated Membrane Protein 8                                  | Protein coding | 41 | GC02P085561 | 2.772378922 | <a href="https://www.genecards.org/cgi-bin/carddisp.pl?gene=VAMP8">https://www.genecards.org/cgi-bin/carddisp.pl?gene=VAMP8</a>         |
| SCNN1G    | Sodium Channel Epithelial 1 Subunit γ                                  | Protein coding | 46 | GC16P023182 | 2.769763947 | <a href="https://www.genecards.org/cgi-bin/carddisp.pl?gene=SCNN1G">https://www.genecards.org/cgi-bin/carddisp.pl?gene=SCNN1G</a>       |
| APOD      | Apolipoprotein D                                                       | Protein coding | 42 | GC03M195568 | 2.764491081 | <a href="https://www.genecards.org/cgi-bin/carddisp.pl?gene=APOD">https://www.genecards.org/cgi-bin/carddisp.pl?gene=APOD</a>           |
| MYH15     | Myosin Heavy Chain 15                                                  | Protein coding | 38 | GC03M108380 | 2.763609886 | <a href="https://www.genecards.org/cgi-bin/carddisp.pl?gene=MYH15">https://www.genecards.org/cgi-bin/carddisp.pl?gene=MYH15</a>         |
| SNX19     | Sorting Nexin 19                                                       | Protein coding | 36 | GC11M130868 | 2.763609886 | <a href="https://www.genecards.org/cgi-bin/carddisp.pl?gene=SNX19">https://www.genecards.org/cgi-bin/carddisp.pl?gene=SNX19</a>         |
| ICAM4     | Intercellular Adhesion Molecule 4 (Landsteiner-Wiener Blood Group)     | Protein coding | 37 | GC19P010286 | 2.763345718 | <a href="https://www.genecards.org/cgi-bin/carddisp.pl?gene=ICAM4">https://www.genecards.org/cgi-bin/carddisp.pl?gene=ICAM4</a>         |
| ADRA2B    | Adrenoceptor α 2B                                                      | Protein coding | 46 | GC02M096112 | 2.761274815 | <a href="https://www.genecards.org/cgi-bin/carddisp.pl?gene=ADRA2B">https://www.genecards.org/cgi-bin/carddisp.pl?gene=ADRA2B</a>       |
| LMX1B     | LIM Homeobox Transcription Factor 1 β                                  | Protein coding | 45 | GC09P126614 | 2.760239124 | <a href="https://www.genecards.org/cgi-bin/carddisp.pl?gene=LMX1B">https://www.genecards.org/cgi-bin/carddisp.pl?gene=LMX1B</a>         |
| IL1F10    | Interleukin 1 Family Member 10                                         | Protein coding | 38 | GC02P113067 | 2.756058931 | <a href="https://www.genecards.org/cgi-bin/carddisp.pl?gene=IL1F10">https://www.genecards.org/cgi-bin/carddisp.pl?gene=IL1F10</a>       |
| CSF1      | Colony Stimulating Factor 1                                            | Protein coding | 43 | GC01P109911 | 2.755208969 | <a href="https://www.genecards.org/cgi-bin/carddisp.pl?gene=CSF1">https://www.genecards.org/cgi-bin/carddisp.pl?gene=CSF1</a>           |
| GRM8      | Glutamate Metabotropic Receptor 8                                      | Protein coding | 47 | GC07M126438 | 2.754663944 | <a href="https://www.genecards.org/cgi-bin/carddisp.pl?gene=GRM8">https://www.genecards.org/cgi-bin/carddisp.pl?gene=GRM8</a>           |
| COL6A3    | Collagen Type VI α 3 Chain                                             | Protein coding | 44 | GC02M237324 | 2.751624107 | <a href="https://www.genecards.org/cgi-bin/carddisp.pl?gene=COL6A3">https://www.genecards.org/cgi-bin/carddisp.pl?gene=COL6A3</a>       |
| IRF1      | Interferon Regulatory Factor 1                                         | Protein coding | 47 | GC05M132440 | 2.747545242 | <a href="https://www.genecards.org/cgi-bin/carddisp.pl?gene=IRF1">https://www.genecards.org/cgi-bin/carddisp.pl?gene=IRF1</a>           |
| PRKAA2    | Protein Kinase AMP-Activated Catalytic Subunit α 2                     | Protein coding | 50 | GC01P056645 | 2.743619919 | <a href="https://www.genecards.org/cgi-bin/carddisp.pl?gene=PRKAA2">https://www.genecards.org/cgi-bin/carddisp.pl?gene=PRKAA2</a>       |
| HAMP      | Hepcidin Antimicrobial Peptide                                         | Protein coding | 44 | GC19P041412 | 2.742558241 | <a href="https://www.genecards.org/cgi-bin/carddisp.pl?gene=HAMP">https://www.genecards.org/cgi-bin/carddisp.pl?gene=HAMP</a>           |
| GSTO2     | Glutathione S-Transferase α 2                                          | Protein coding | 43 | GC10P104268 | 2.742022514 | <a href="https://www.genecards.org/cgi-bin/carddisp.pl?gene=GSTO2">https://www.genecards.org/cgi-bin/carddisp.pl?gene=GSTO2</a>         |
| NTRK1     | Neurotrophic Receptor Tyrosine Kinase 1                                | Protein coding | 49 | GC01P156815 | 2.741882801 | <a href="https://www.genecards.org/cgi-bin/carddisp.pl?gene=NTRK1">https://www.genecards.org/cgi-bin/carddisp.pl?gene=NTRK1</a>         |
| STAT4     | Signal Transducer And Activator Of Transcription 4                     | Protein coding | 47 | GC02M191029 | 2.741284847 | <a href="https://www.genecards.org/cgi-bin/carddisp.pl?gene=STAT4">https://www.genecards.org/cgi-bin/carddisp.pl?gene=STAT4</a>         |
| PPARD     | Peroxisome Proliferator Activated Receptor δ                           | Protein coding | 47 | GC06P058435 | 2.738316059 | <a href="https://www.genecards.org/cgi-bin/carddisp.pl?gene=PPARD">https://www.genecards.org/cgi-bin/carddisp.pl?gene=PPARD</a>         |
| TRIB1     | Tribbles Pseudokinase 1                                                | Protein coding | 38 | GC08P125430 | 2.735250235 | <a href="https://www.genecards.org/cgi-bin/carddisp.pl?gene=TRIB1">https://www.genecards.org/cgi-bin/carddisp.pl?gene=TRIB1</a>         |
| SERPINA12 | Serpin Family A Member 12                                              | Protein coding | 38 | GC14M096476 | 2.735022783 | <a href="https://www.genecards.org/cgi-bin/carddisp.pl?gene=SERPINA12">https://www.genecards.org/cgi-bin/carddisp.pl?gene=SERPINA12</a> |
| NQO1      | NAD(P)H Quinone Dehydrogenase 1                                        | Protein coding | 48 | GC16M069706 | 2.734405518 | <a href="https://www.genecards.org/cgi-bin/carddisp.pl?gene=NQO1">https://www.genecards.org/cgi-bin/carddisp.pl?gene=NQO1</a>           |
| MIR24-1   | MicroRNA 24-1                                                          | RNA gene       | 19 | GC09P095086 | 2.73285675  | <a href="https://www.genecards.org/cgi-bin/carddisp.pl?gene=MIR24-1">https://www.genecards.org/cgi-bin/carddisp.pl?gene=MIR24-1</a>     |
| HSPD1     | Heat Shock Protein Family D (Hsp60) Member 1                           | Protein coding | 47 | GC02M197486 | 2.728806257 | <a href="https://www.genecards.org/cgi-bin/carddisp.pl?gene=HSPD1">https://www.genecards.org/cgi-bin/carddisp.pl?gene=HSPD1</a>         |
| AKT2      | AKT Serine/Threonine Kinase 2                                          | Protein coding | 54 | GC19M040230 | 2.727531433 | <a href="https://www.genecards.org/cgi-bin/carddisp.pl?gene=AKT2">https://www.genecards.org/cgi-bin/carddisp.pl?gene=AKT2</a>           |
| GATA5     | GATA Binding Protein 5                                                 | Protein coding | 39 | GC20M062464 | 2.726651907 | <a href="https://www.genecards.org/cgi-bin/carddisp.pl?gene=GATA5">https://www.genecards.org/cgi-bin/carddisp.pl?gene=GATA5</a>         |
| ERAP1     | Endoplasmic Reticulum Aminopeptidase 1                                 | Protein coding | 44 | GC05M096760 | 2.72621274  | <a href="https://www.genecards.org/cgi-bin/carddisp.pl?gene=ERAP1">https://www.genecards.org/cgi-bin/carddisp.pl?gene=ERAP1</a>         |
| HSPA1B    | Heat Shock Protein Family A (Hsp70) Member 1B                          | Protein coding | 39 | GC06P058327 | 2.72118926  | <a href="https://www.genecards.org/cgi-bin/carddisp.pl?gene=HSPA1B">https://www.genecards.org/cgi-bin/carddisp.pl?gene=HSPA1B</a>       |

|           |                                                              |                |    |             |             |                                                                                                                                         |
|-----------|--------------------------------------------------------------|----------------|----|-------------|-------------|-----------------------------------------------------------------------------------------------------------------------------------------|
| EGLN1     | Egl-9 Family Hypoxia Inducible Factor 1                      | Protein coding | 50 | GC01M231363 | 2.719798803 | <a href="https://www.genecards.org/cgi-bin/carddisp.pl?gene=EGLN1">https://www.genecards.org/cgi-bin/carddisp.pl?gene=EGLN1</a>         |
| OPA1      | OPA1 Mitochondrial Dynamin Like GTPase                       | Protein coding | 44 | GC03P193594 | 2.718375921 | <a href="https://www.genecards.org/cgi-bin/carddisp.pl?gene=OPA1">https://www.genecards.org/cgi-bin/carddisp.pl?gene=OPA1</a>           |
| TLR3      | Toll Like Receptor 3                                         | Protein coding | 51 | GC04P186059 | 2.714648724 | <a href="https://www.genecards.org/cgi-bin/carddisp.pl?gene=TLR3">https://www.genecards.org/cgi-bin/carddisp.pl?gene=TLR3</a>           |
| MVK       | Mevalonate Kinase                                            | Protein coding | 48 | GC12P109573 | 2.712249756 | <a href="https://www.genecards.org/cgi-bin/carddisp.pl?gene=MVK">https://www.genecards.org/cgi-bin/carddisp.pl?gene=MVK</a>             |
| LRP5      | LDL Receptor Related Protein 5                               | Protein coding | 48 | GC11P068298 | 2.711889744 | <a href="https://www.genecards.org/cgi-bin/carddisp.pl?gene=LRP5">https://www.genecards.org/cgi-bin/carddisp.pl?gene=LRP5</a>           |
| NPR1      | Natriuretic Peptide Receptor 1                               | Protein coding | 46 | GC01P153735 | 2.71130085  | <a href="https://www.genecards.org/cgi-bin/carddisp.pl?gene=NPR1">https://www.genecards.org/cgi-bin/carddisp.pl?gene=NPR1</a>           |
| CCL17     | C-C Motif Chemokine Ligand 17                                | Protein coding | 37 | GC16P057405 | 2.707761526 | <a href="https://www.genecards.org/cgi-bin/carddisp.pl?gene=CCL17">https://www.genecards.org/cgi-bin/carddisp.pl?gene=CCL17</a>         |
| EPAS1     | Endothelial PAS Domain Protein 1                             | Protein coding | 49 | GC02P046293 | 2.706075668 | <a href="https://www.genecards.org/cgi-bin/carddisp.pl?gene=EPAS1">https://www.genecards.org/cgi-bin/carddisp.pl?gene=EPAS1</a>         |
| AUTS2     | Activator Of Transcription And Developmental Regulator AUTS2 | Protein coding | 39 | GC07P069598 | 2.705483437 | <a href="https://www.genecards.org/cgi-bin/carddisp.pl?gene=AUTS2">https://www.genecards.org/cgi-bin/carddisp.pl?gene=AUTS2</a>         |
| GRK2      | G Protein-Coupled Receptor Kinase 2                          | Protein coding | 37 | GC11P067266 | 2.700797558 | <a href="https://www.genecards.org/cgi-bin/carddisp.pl?gene=GRK2">https://www.genecards.org/cgi-bin/carddisp.pl?gene=GRK2</a>           |
| CCR1      | C-C Motif Chemokine Receptor 1                               | Protein coding | 45 | GC03M046218 | 2.698007584 | <a href="https://www.genecards.org/cgi-bin/carddisp.pl?gene=CCR1">https://www.genecards.org/cgi-bin/carddisp.pl?gene=CCR1</a>           |
| KLC1      | Kinesin Light Chain 1                                        | Protein coding | 41 | GC14P106529 | 2.693399429 | <a href="https://www.genecards.org/cgi-bin/carddisp.pl?gene=KLC1">https://www.genecards.org/cgi-bin/carddisp.pl?gene=KLC1</a>           |
| MIR188    | MicroRNA 188                                                 | RNA gene       | 16 | GC0XP050003 | 2.688959122 | <a href="https://www.genecards.org/cgi-bin/carddisp.pl?gene=MIR188">https://www.genecards.org/cgi-bin/carddisp.pl?gene=MIR188</a>       |
| SLC25A4   | Solute Carrier Family 25 Member 4                            | Protein coding | 50 | GC04P185143 | 2.6851542   | <a href="https://www.genecards.org/cgi-bin/carddisp.pl?gene=SLC25A4">https://www.genecards.org/cgi-bin/carddisp.pl?gene=SLC25A4</a>     |
| ATP2B3    | ATPase Plasma Membrane Ca2+ Transporting 3                   | Protein coding | 48 | GC0XP153517 | 2.683402538 | <a href="https://www.genecards.org/cgi-bin/carddisp.pl?gene=ATP2B3">https://www.genecards.org/cgi-bin/carddisp.pl?gene=ATP2B3</a>       |
| GSN       | Gelsolin                                                     | Protein coding | 48 | GC09P121201 | 2.681714058 | <a href="https://www.genecards.org/cgi-bin/carddisp.pl?gene=GSN">https://www.genecards.org/cgi-bin/carddisp.pl?gene=GSN</a>             |
| ST2       | Suppression Of Tumorigenicity 2                              | Genetic locus  | 6  | GC11U990127 | 2.681020498 | <a href="https://www.genecards.org/cgi-bin/carddisp.pl?gene=ST2">https://www.genecards.org/cgi-bin/carddisp.pl?gene=ST2</a>             |
| KCNQ2     | Potassium Voltage-Gated Channel Subfamily Q Member 2         | Protein coding | 48 | GC20M063400 | 2.680829048 | <a href="https://www.genecards.org/cgi-bin/carddisp.pl?gene=KCNQ2">https://www.genecards.org/cgi-bin/carddisp.pl?gene=KCNQ2</a>         |
| RAC1      | Rac Family Small GTPase 1                                    | Protein coding | 49 | GC07P006377 | 2.680413246 | <a href="https://www.genecards.org/cgi-bin/carddisp.pl?gene=RAC1">https://www.genecards.org/cgi-bin/carddisp.pl?gene=RAC1</a>           |
| CXCL16    | C-X-C Motif Chemokine Ligand 16                              | Protein coding | 39 | GC17M004733 | 2.669481516 | <a href="https://www.genecards.org/cgi-bin/carddisp.pl?gene=CXCL16">https://www.genecards.org/cgi-bin/carddisp.pl?gene=CXCL16</a>       |
| CLEC16A   | C-Type Lectin Domain Containing 16A                          | Protein coding | 37 | GC16P010944 | 2.66871953  | <a href="https://www.genecards.org/cgi-bin/carddisp.pl?gene=CLEC16A">https://www.genecards.org/cgi-bin/carddisp.pl?gene=CLEC16A</a>     |
| KCNK4     | Potassium Two Pore Domain Channel Subfamily K Member 4       | Protein coding | 41 | GC11P064292 | 2.666420221 | <a href="https://www.genecards.org/cgi-bin/carddisp.pl?gene=KCNK4">https://www.genecards.org/cgi-bin/carddisp.pl?gene=KCNK4</a>         |
| MIR150    | MicroRNA 150                                                 | RNA gene       | 22 | GC19M049500 | 2.663278103 | <a href="https://www.genecards.org/cgi-bin/carddisp.pl?gene=MIR150">https://www.genecards.org/cgi-bin/carddisp.pl?gene=MIR150</a>       |
| LAMA1     | Laminin Subunit $\alpha$ 1                                   | Protein coding | 46 | GC18M006941 | 2.660968781 | <a href="https://www.genecards.org/cgi-bin/carddisp.pl?gene=LAMA1">https://www.genecards.org/cgi-bin/carddisp.pl?gene=LAMA1</a>         |
| NRG1      | Neuregulin 1                                                 | Protein coding | 46 | GC08P031639 | 2.660413265 | <a href="https://www.genecards.org/cgi-bin/carddisp.pl?gene=NRG1">https://www.genecards.org/cgi-bin/carddisp.pl?gene=NRG1</a>           |
| EIF2AK2   | Eukaryotic Translation Initiation Factor 2 $\alpha$ Kinase 2 | Protein coding | 47 | GC02M037099 | 2.657449722 | <a href="https://www.genecards.org/cgi-bin/carddisp.pl?gene=EIF2AK2">https://www.genecards.org/cgi-bin/carddisp.pl?gene=EIF2AK2</a>     |
| CSTB      | Cystatin B                                                   | Protein coding | 45 | GC21M043772 | 2.655944824 | <a href="https://www.genecards.org/cgi-bin/carddisp.pl?gene=CSTB">https://www.genecards.org/cgi-bin/carddisp.pl?gene=CSTB</a>           |
| ALDH1A2   | Aldehyde Dehydrogenase 1 Family Member A2                    | Protein coding | 48 | GC15M068750 | 2.653786421 | <a href="https://www.genecards.org/cgi-bin/carddisp.pl?gene=ALDH1A2">https://www.genecards.org/cgi-bin/carddisp.pl?gene=ALDH1A2</a>     |
| CRH       | Corticotropin Releasing Hormone                              | Protein coding | 44 | GC08M066176 | 2.650784492 | <a href="https://www.genecards.org/cgi-bin/carddisp.pl?gene=CRH">https://www.genecards.org/cgi-bin/carddisp.pl?gene=CRH</a>             |
| VIP       | Vasoactive Intestinal Peptide                                | Protein coding | 44 | GC06P152750 | 2.649690628 | <a href="https://www.genecards.org/cgi-bin/carddisp.pl?gene=VIP">https://www.genecards.org/cgi-bin/carddisp.pl?gene=VIP</a>             |
| PROS1     | Protein S                                                    | Protein coding | 47 | GC03M093873 | 2.647009611 | <a href="https://www.genecards.org/cgi-bin/carddisp.pl?gene=PROS1">https://www.genecards.org/cgi-bin/carddisp.pl?gene=PROS1</a>         |
| MIR30E    | MicroRNA 30e                                                 | RNA gene       | 22 | GC01P040754 | 2.646023512 | <a href="https://www.genecards.org/cgi-bin/carddisp.pl?gene=MIR30E">https://www.genecards.org/cgi-bin/carddisp.pl?gene=MIR30E</a>       |
| SUPT3H    | SPT3 Homolog, SAGA And STAGA Complex Component               | Protein coding | 41 | GC06M049405 | 2.642816067 | <a href="https://www.genecards.org/cgi-bin/carddisp.pl?gene=SUPT3H">https://www.genecards.org/cgi-bin/carddisp.pl?gene=SUPT3H</a>       |
| ITPR3     | Inositol 1,4,5-Trisphosphate Receptor Type 3                 | Protein coding | 46 | GC06P033620 | 2.64207983  | <a href="https://www.genecards.org/cgi-bin/carddisp.pl?gene=ITPR3">https://www.genecards.org/cgi-bin/carddisp.pl?gene=ITPR3</a>         |
| IDE       | Insulin Degrading Enzyme                                     | Protein coding | 48 | GC10M092451 | 2.640630007 | <a href="https://www.genecards.org/cgi-bin/carddisp.pl?gene=IDE">https://www.genecards.org/cgi-bin/carddisp.pl?gene=IDE</a>             |
| UMOD      | Uromodulin                                                   | Protein coding | 41 | GC16M020344 | 2.632339954 | <a href="https://www.genecards.org/cgi-bin/carddisp.pl?gene=UMOD">https://www.genecards.org/cgi-bin/carddisp.pl?gene=UMOD</a>           |
| NFKB1     | Nuclear Factor $\kappa$ B Subunit 1                          | Protein coding | 52 | GC04P102501 | 2.631258965 | <a href="https://www.genecards.org/cgi-bin/carddisp.pl?gene=NFKB1">https://www.genecards.org/cgi-bin/carddisp.pl?gene=NFKB1</a>         |
| PSRC1     | Proline And Serine Rich Coiled-Coil 1                        | Protein coding | 38 | GC01M109279 | 2.627158642 | <a href="https://www.genecards.org/cgi-bin/carddisp.pl?gene=PSRC1">https://www.genecards.org/cgi-bin/carddisp.pl?gene=PSRC1</a>         |
| LEMD3     | LEM Domain Containing 3                                      | Protein coding | 41 | GC12P065169 | 2.625838757 | <a href="https://www.genecards.org/cgi-bin/carddisp.pl?gene=LEMD3">https://www.genecards.org/cgi-bin/carddisp.pl?gene=LEMD3</a>         |
| PLAUR     | Plasminogen Activator, Urokinase Receptor                    | Protein coding | 44 | GC19M043646 | 2.622840166 | <a href="https://www.genecards.org/cgi-bin/carddisp.pl?gene=PLAUR">https://www.genecards.org/cgi-bin/carddisp.pl?gene=PLAUR</a>         |
| AQP1      | Aquaporin 1 (Colton Blood Group)                             | Protein coding | 46 | GC07P030911 | 2.622479677 | <a href="https://www.genecards.org/cgi-bin/carddisp.pl?gene=AQP1">https://www.genecards.org/cgi-bin/carddisp.pl?gene=AQP1</a>           |
| KLK1      | Kallikrein 1                                                 | Protein coding | 45 | GC19M050819 | 2.620002508 | <a href="https://www.genecards.org/cgi-bin/carddisp.pl?gene=KLK1">https://www.genecards.org/cgi-bin/carddisp.pl?gene=KLK1</a>           |
| IL11      | Interleukin 11                                               | Protein coding | 40 | GC19M055364 | 2.619628906 | <a href="https://www.genecards.org/cgi-bin/carddisp.pl?gene=IL11">https://www.genecards.org/cgi-bin/carddisp.pl?gene=IL11</a>           |
| FABP12    | Fatty Acid Binding Protein 12                                | Protein coding | 31 | GC08M081524 | 2.614249229 | <a href="https://www.genecards.org/cgi-bin/carddisp.pl?gene=FABP12">https://www.genecards.org/cgi-bin/carddisp.pl?gene=FABP12</a>       |
| TLR8      | Toll Like Receptor 8                                         | Protein coding | 47 | GC0XP012924 | 2.609654427 | <a href="https://www.genecards.org/cgi-bin/carddisp.pl?gene=TLR8">https://www.genecards.org/cgi-bin/carddisp.pl?gene=TLR8</a>           |
| PRTN3     | Proteinase 3                                                 | Protein coding | 44 | GC19P000840 | 2.60869956  | <a href="https://www.genecards.org/cgi-bin/carddisp.pl?gene=PRTN3">https://www.genecards.org/cgi-bin/carddisp.pl?gene=PRTN3</a>         |
| HRES1     | HTLV-1 Related Endogenous Sequence                           | Pseudgene      | 11 | GC01U990083 | 2.608298779 | <a href="https://www.genecards.org/cgi-bin/carddisp.pl?gene=HRES1">https://www.genecards.org/cgi-bin/carddisp.pl?gene=HRES1</a>         |
| TTC7B     | Tetratricopeptide Repeat Domain 7B                           | Protein coding | 33 | GC14M090524 | 2.60736227  | <a href="https://www.genecards.org/cgi-bin/carddisp.pl?gene=TTC7B">https://www.genecards.org/cgi-bin/carddisp.pl?gene=TTC7B</a>         |
| AP3B1     | Adaptor Related Protein Complex 3 Subunit $\beta$ 1          | Protein coding | 45 | GC05M078000 | 2.604679108 | <a href="https://www.genecards.org/cgi-bin/carddisp.pl?gene=AP3B1">https://www.genecards.org/cgi-bin/carddisp.pl?gene=AP3B1</a>         |
| TRAF3     | TNF Receptor Associated Factor 3                             | Protein coding | 47 | GC14P106523 | 2.604533672 | <a href="https://www.genecards.org/cgi-bin/carddisp.pl?gene=TRAF3">https://www.genecards.org/cgi-bin/carddisp.pl?gene=TRAF3</a>         |
| MIR17     | MicroRNA 17                                                  | RNA gene       | 22 | GC13P091350 | 2.603705406 | <a href="https://www.genecards.org/cgi-bin/carddisp.pl?gene=MIR17">https://www.genecards.org/cgi-bin/carddisp.pl?gene=MIR17</a>         |
| RUNX1     | RUNX Family Transcription Factor 1                           | Protein coding | 48 | GC21M034787 | 2.601000786 | <a href="https://www.genecards.org/cgi-bin/carddisp.pl?gene=RUNX1">https://www.genecards.org/cgi-bin/carddisp.pl?gene=RUNX1</a>         |
| FADS1     | Fatty Acid Desaturase 1                                      | Protein coding | 44 | GC11M061799 | 2.600322723 | <a href="https://www.genecards.org/cgi-bin/carddisp.pl?gene=FADS1">https://www.genecards.org/cgi-bin/carddisp.pl?gene=FADS1</a>         |
| GHRH      | Growth Hormone Releasing Hormone                             | Protein coding | 38 | GC20M037251 | 2.598248005 | <a href="https://www.genecards.org/cgi-bin/carddisp.pl?gene=GHRH">https://www.genecards.org/cgi-bin/carddisp.pl?gene=GHRH</a>           |
| HLA-DRA   | Major Histocompatibility Complex, Class II, DR $\alpha$      | Protein coding | 47 | GC06P032439 | 2.598051548 | <a href="https://www.genecards.org/cgi-bin/carddisp.pl?gene=HLA-DRA">https://www.genecards.org/cgi-bin/carddisp.pl?gene=HLA-DRA</a>     |
| DSP       | Desmoplakin                                                  | Protein coding | 50 | GC06P007541 | 2.597561598 | <a href="https://www.genecards.org/cgi-bin/carddisp.pl?gene=DSP">https://www.genecards.org/cgi-bin/carddisp.pl?gene=DSP</a>             |
| ADAMTS1   | ADAM Metallopeptidase With Thrombospondin Type 1 Motif 1     | Protein coding | 45 | GC21M026835 | 2.584623098 | <a href="https://www.genecards.org/cgi-bin/carddisp.pl?gene=ADAMTS1">https://www.genecards.org/cgi-bin/carddisp.pl?gene=ADAMTS1</a>     |
| ARHGEF10  | Rho Guanine Nucleotide Exchange Factor 10                    | Protein coding | 43 | GC08P001823 | 2.582096577 | <a href="https://www.genecards.org/cgi-bin/carddisp.pl?gene=ARHGEF10">https://www.genecards.org/cgi-bin/carddisp.pl?gene=ARHGEF10</a>   |
| NGFR      | Nerve Growth Factor Receptor                                 | Protein coding | 45 | GC17P049495 | 2.580614328 | <a href="https://www.genecards.org/cgi-bin/carddisp.pl?gene=NGFR">https://www.genecards.org/cgi-bin/carddisp.pl?gene=NGFR</a>           |
| ADCYAP1R1 | ADCYAP Receptor Type I                                       | Protein coding | 45 | GC07P031058 | 2.578980446 | <a href="https://www.genecards.org/cgi-bin/carddisp.pl?gene=ADCYAP1R1">https://www.genecards.org/cgi-bin/carddisp.pl?gene=ADCYAP1R1</a> |
| KCNQ3     | Potassium Voltage-Gated Channel Subfamily Q Member 3         | Protein coding | 45 | GC08M132120 | 2.575335741 | <a href="https://www.genecards.org/cgi-bin/carddisp.pl?gene=KCNQ3">https://www.genecards.org/cgi-bin/carddisp.pl?gene=KCNQ3</a>         |
| TNFSF12   | TNF Superfamily Member 12                                    | Protein coding | 40 | GC17P009335 | 2.571112633 | <a href="https://www.genecards.org/cgi-bin/carddisp.pl?gene=TNFSF12">https://www.genecards.org/cgi-bin/carddisp.pl?gene=TNFSF12</a>     |
| ZCCHC14   | Zinc Finger CCHC-Type Containing 14                          | Protein coding | 33 | GC16M087406 | 2.569196701 | <a href="https://www.genecards.org/cgi-bin/carddisp.pl?gene=ZCCHC14">https://www.genecards.org/cgi-bin/carddisp.pl?gene=ZCCHC14</a>     |
| PDGFD     | Platelet Derived Growth Factor D                             | Protein coding | 44 | GC11M103907 | 2.567523956 | <a href="https://www.genecards.org/cgi-bin/carddisp.pl?gene=PDGFD">https://www.genecards.org/cgi-bin/carddisp.pl?gene=PDGFD</a>         |
| DCN       | Decorin                                                      | Protein coding | 46 | GC12M091140 | 2.567391872 | <a href="https://www.genecards.org/cgi-bin/carddisp.pl?gene=DCN">https://www.genecards.org/cgi-bin/carddisp.pl?gene=DCN</a>             |
| BLK       | BLK Proto-Oncogene, Src Family Tyrosine Kinase               | Protein coding | 50 | GC08P011486 | 2.563750267 | <a href="https://www.genecards.org/cgi-bin/carddisp.pl?gene=BLK">https://www.genecards.org/cgi-bin/carddisp.pl?gene=BLK</a>             |
| ITGB6     | Integrin Subunit $\beta$ 6                                   | Protein coding | 47 | GC02M160099 | 2.561737776 | <a href="https://www.genecards.org/cgi-bin/carddisp.pl?gene=ITGB6">https://www.genecards.org/cgi-bin/carddisp.pl?gene=ITGB6</a>         |
| SERPINA9  | Serpin Family A Member 9                                     | Protein coding | 34 | GC14M094462 | 2.558998585 | <a href="https://www.genecards.org/cgi-bin/carddisp.pl?gene=SERPINA9">https://www.genecards.org/cgi-bin/carddisp.pl?gene=SERPINA9</a>   |
| HNF4A     | Hepatocyte Nuclear Factor 4 $\alpha$                         | Protein coding | 51 | GC20P044355 | 2.558803082 | <a href="https://www.genecards.org/cgi-bin/carddisp.pl?gene=HNF4A">https://www.genecards.org/cgi-bin/carddisp.pl?gene=HNF4A</a>         |
| MLYCD     | Malonyl-CoA Decarboxylase                                    | Protein coding | 43 | GC16P083899 | 2.558645487 | <a href="https://www.genecards.org/cgi-bin/carddisp.pl?gene=MLYCD">https://www.genecards.org/cgi-bin/carddisp.pl?gene=MLYCD</a>         |
| ITGA4     | Integrin Subunit $\alpha$ 4                                  | Protein coding | 48 | GC02P181456 | 2.556515455 | <a href="https://www.genecards.org/cgi-bin/carddisp.pl?gene=ITGA4">https://www.genecards.org/cgi-bin/carddisp.pl?gene=ITGA4</a>         |
| FGFR1     | Fibroblast Growth Factor Receptor 1                          | Protein coding | 54 | GC08M038400 | 2.556310892 | <a href="https://www.genecards.org/cgi-bin/carddisp.pl?gene=FGFR1">https://www.genecards.org/cgi-bin/carddisp.pl?gene=FGFR1</a>         |
| HPS1      | HPS1 Biogenesis Of Lysosomal Organelles Complex 3 Subunit 1  | Protein coding | 42 | GC10M098416 | 2.553804398 | <a href="https://www.genecards.org/cgi-bin/carddisp.pl?gene=HPS1">https://www.genecards.org/cgi-bin/carddisp.pl?gene=HPS1</a>           |
| MAPK10    | Mitogen-Activated Protein Kinase 10                          | Protein coding | 50 | GC04M085990 | 2.552734852 | <a href="https://www.genecards.org/cgi-bin/carddisp.pl?gene=MAPK10">https://www.genecards.org/cgi-bin/carddisp.pl?gene=MAPK10</a>       |
| UBR3      | Ubiquitin Protein Ligase E3 Component N-Recognin 3           | Protein coding | 35 | GC02P169827 | 2.547387123 | <a href="https://www.genecards.org/cgi-bin/carddisp.pl?gene=UBR3">https://www.genecards.org/cgi-bin/carddisp.pl?gene=UBR3</a>           |
| FOXF2     | Forkhead Box F2                                              | Protein coding | 37 | GC06P001390 | 2.54714489  | <a href="https://www.genecards.org/cgi-bin/carddisp.pl?gene=FOXF2">https://www.genecards.org/cgi-bin/carddisp.pl?gene=FOXF2</a>         |

|              |                                                                                |                   |    |             |             |                                                                                                                                               |
|--------------|--------------------------------------------------------------------------------|-------------------|----|-------------|-------------|-----------------------------------------------------------------------------------------------------------------------------------------------|
| USF1         | Upstream Transcription Factor 1                                                | Protein coding    | 43 | GC01M161039 | 2.546326876 | <a href="https://www.genecards.org/cgi-bin/carddisp.pl?gene=USF1">https://www.genecards.org/cgi-bin/carddisp.pl?gene=USF1</a>                 |
| PRCP         | Prolylcarboxypeptidase                                                         | Protein coding    | 45 | GC11M082823 | 2.545893431 | <a href="https://www.genecards.org/cgi-bin/carddisp.pl?gene=PRCP">https://www.genecards.org/cgi-bin/carddisp.pl?gene=PRCP</a>                 |
| APIP         | APAF1 Interacting Protein                                                      | Protein coding    | 39 | GC11M034854 | 2.544367552 | <a href="https://www.genecards.org/cgi-bin/carddisp.pl?gene=APIP">https://www.genecards.org/cgi-bin/carddisp.pl?gene=APIP</a>                 |
| STK11        | Serine/Threonine Kinase 11                                                     | Protein coding    | 49 | GC19P001177 | 2.540942907 | <a href="https://www.genecards.org/cgi-bin/carddisp.pl?gene=STK11">https://www.genecards.org/cgi-bin/carddisp.pl?gene=STK11</a>               |
| FASLG        | Fas Ligand                                                                     | Protein coding    | 47 | GC01P172628 | 2.539871693 | <a href="https://www.genecards.org/cgi-bin/carddisp.pl?gene=FASLG">https://www.genecards.org/cgi-bin/carddisp.pl?gene=FASLG</a>               |
| MAPK8IP1     | Mitogen-Activated Protein Kinase 8 Interacting Protein 1                       | Protein coding    | 45 | GC11P046139 | 2.539869308 | <a href="https://www.genecards.org/cgi-bin/carddisp.pl?gene=MAPK8IP1">https://www.genecards.org/cgi-bin/carddisp.pl?gene=MAPK8IP1</a>         |
| DPP4         | Dipeptidyl Peptidase 4                                                         | Protein coding    | 49 | GC02M161992 | 2.538581848 | <a href="https://www.genecards.org/cgi-bin/carddisp.pl?gene=DPP4">https://www.genecards.org/cgi-bin/carddisp.pl?gene=DPP4</a>                 |
| HOTAIR       | HOX Transcript Antisense RNA                                                   | RNA gene          | 26 | GC12M053962 | 2.538295746 | <a href="https://www.genecards.org/cgi-bin/carddisp.pl?gene=HOTAIR">https://www.genecards.org/cgi-bin/carddisp.pl?gene=HOTAIR</a>             |
| HHT3         | Osler-Rendu-Weber Syndrome 3                                                   | Genetic locus     | 1  | GC05U901934 | 2.53821969  | <a href="https://www.genecards.org/cgi-bin/carddisp.pl?gene=HHT3">https://www.genecards.org/cgi-bin/carddisp.pl?gene=HHT3</a>                 |
| KCNIP4       | Potassium Voltage-Gated Channel Interacting Protein 4                          | Protein coding    | 38 | GC04M020728 | 2.535425186 | <a href="https://www.genecards.org/cgi-bin/carddisp.pl?gene=KCNIP4">https://www.genecards.org/cgi-bin/carddisp.pl?gene=KCNIP4</a>             |
| LBP          | Lipopolysaccharide Binding Protein                                             | Protein coding    | 43 | GC20P038346 | 2.533523083 | <a href="https://www.genecards.org/cgi-bin/carddisp.pl?gene=LBP">https://www.genecards.org/cgi-bin/carddisp.pl?gene=LBP</a>                   |
| ANGPTL4      | Angiopietin Like 4                                                             | Protein coding    | 44 | GC19P008363 | 2.533199549 | <a href="https://www.genecards.org/cgi-bin/carddisp.pl?gene=ANGPTL4">https://www.genecards.org/cgi-bin/carddisp.pl?gene=ANGPTL4</a>           |
| CXCR2        | C-X-C Motif Chemokine Receptor 2                                               | Protein coding    | 48 | GC02P218125 | 2.532358408 | <a href="https://www.genecards.org/cgi-bin/carddisp.pl?gene=CXCR2">https://www.genecards.org/cgi-bin/carddisp.pl?gene=CXCR2</a>               |
| FUNDC2       | FUN14 Domain Containing 2                                                      | Protein coding    | 34 | GC0XP155025 | 2.531027555 | <a href="https://www.genecards.org/cgi-bin/carddisp.pl?gene=FUNDC2">https://www.genecards.org/cgi-bin/carddisp.pl?gene=FUNDC2</a>             |
| SLC9A3R2     | SLC9A3 Regulator 2                                                             | Protein coding    | 40 | GC16P006188 | 2.528905869 | <a href="https://www.genecards.org/cgi-bin/carddisp.pl?gene=SLC9A3R2">https://www.genecards.org/cgi-bin/carddisp.pl?gene=SLC9A3R2</a>         |
| SMPD1        | Sphingomyelin Phosphodiesterase 1                                              | Protein coding    | 47 | GC11P006390 | 2.528905153 | <a href="https://www.genecards.org/cgi-bin/carddisp.pl?gene=SMPD1">https://www.genecards.org/cgi-bin/carddisp.pl?gene=SMPD1</a>               |
| TCF21        | Transcription Factor 21                                                        | Protein coding    | 36 | GC06P133889 | 2.52686739  | <a href="https://www.genecards.org/cgi-bin/carddisp.pl?gene=TCF21">https://www.genecards.org/cgi-bin/carddisp.pl?gene=TCF21</a>               |
| HSPG2        | Heparan Sulfate Proteoglycan 2                                                 | Protein coding    | 46 | GC01M021822 | 2.52656889  | <a href="https://www.genecards.org/cgi-bin/carddisp.pl?gene=HSPG2">https://www.genecards.org/cgi-bin/carddisp.pl?gene=HSPG2</a>               |
| CAMTA1       | Calmodulin Binding Transcription Activator 1                                   | Protein coding    | 40 | GC01P006825 | 2.525376558 | <a href="https://www.genecards.org/cgi-bin/carddisp.pl?gene=CAMTA1">https://www.genecards.org/cgi-bin/carddisp.pl?gene=CAMTA1</a>             |
| TRAPPC9      | Trafficking Protein Particle Complex Subunit 9                                 | Protein coding    | 38 | GC08M139728 | 2.525376558 | <a href="https://www.genecards.org/cgi-bin/carddisp.pl?gene=TRAPPC9">https://www.genecards.org/cgi-bin/carddisp.pl?gene=TRAPPC9</a>           |
| EPHA3        | EPH Receptor A3                                                                | Protein coding    | 46 | GC03P089077 | 2.524411917 | <a href="https://www.genecards.org/cgi-bin/carddisp.pl?gene=EPHA3">https://www.genecards.org/cgi-bin/carddisp.pl?gene=EPHA3</a>               |
| GCLC         | Glutamate-Cysteine Ligase Catalytic Subunit                                    | Protein coding    | 44 | GC06M053497 | 2.521836758 | <a href="https://www.genecards.org/cgi-bin/carddisp.pl?gene=GCLC">https://www.genecards.org/cgi-bin/carddisp.pl?gene=GCLC</a>                 |
| NOD2         | Nucleotide Binding Oligomerization Domain Containing 2                         | Protein coding    | 48 | GC16P050693 | 2.519214869 | <a href="https://www.genecards.org/cgi-bin/carddisp.pl?gene=NOD2">https://www.genecards.org/cgi-bin/carddisp.pl?gene=NOD2</a>                 |
| ANGPTL3      | Angiopietin Like 3                                                             | Protein coding    | 45 | GC01P062597 | 2.515438318 | <a href="https://www.genecards.org/cgi-bin/carddisp.pl?gene=ANGPTL3">https://www.genecards.org/cgi-bin/carddisp.pl?gene=ANGPTL3</a>           |
| RARRES2      | Retinoic Acid Receptor Responder 2                                             | Protein coding    | 38 | GC07M150333 | 2.512977362 | <a href="https://www.genecards.org/cgi-bin/carddisp.pl?gene=RARRES2">https://www.genecards.org/cgi-bin/carddisp.pl?gene=RARRES2</a>           |
| BCAN         | Brevican                                                                       | Protein coding    | 41 | GC01P156641 | 2.509629726 | <a href="https://www.genecards.org/cgi-bin/carddisp.pl?gene=BCAN">https://www.genecards.org/cgi-bin/carddisp.pl?gene=BCAN</a>                 |
| MGAT5        | $\alpha$ -1,6-Mannosylglycoprotein 6- $\beta$ -N-Acetylglucosaminyltransferase | Protein coding    | 40 | GC02P134119 | 2.509629726 | <a href="https://www.genecards.org/cgi-bin/carddisp.pl?gene=MGAT5">https://www.genecards.org/cgi-bin/carddisp.pl?gene=MGAT5</a>               |
| SPATA13      | Spermatogenesis Associated 13                                                  | Protein coding    | 37 | GC13P024016 | 2.509629726 | <a href="https://www.genecards.org/cgi-bin/carddisp.pl?gene=SPATA13">https://www.genecards.org/cgi-bin/carddisp.pl?gene=SPATA13</a>           |
| RHOA         | Ras Homolog Family Member A                                                    | Protein coding    | 47 | GC03M049359 | 2.503813267 | <a href="https://www.genecards.org/cgi-bin/carddisp.pl?gene=RHOA">https://www.genecards.org/cgi-bin/carddisp.pl?gene=RHOA</a>                 |
| CSF1R        | Colony Stimulating Factor 1 Receptor                                           | Protein coding    | 51 | GC05M150053 | 2.498917103 | <a href="https://www.genecards.org/cgi-bin/carddisp.pl?gene=CSF1R">https://www.genecards.org/cgi-bin/carddisp.pl?gene=CSF1R</a>               |
| DAPK1        | Death Associated Protein Kinase 1                                              | Protein coding    | 49 | GC09P087497 | 2.498408556 | <a href="https://www.genecards.org/cgi-bin/carddisp.pl?gene=DAPK1">https://www.genecards.org/cgi-bin/carddisp.pl?gene=DAPK1</a>               |
| PCDH19       | Protocadherin 19                                                               | Protein coding    | 41 | GC0XM100291 | 2.497345686 | <a href="https://www.genecards.org/cgi-bin/carddisp.pl?gene=PCDH19">https://www.genecards.org/cgi-bin/carddisp.pl?gene=PCDH19</a>             |
| TRH          | Thyrotropin Releasing Hormone                                                  | Protein coding    | 42 | GC03P129974 | 2.495891571 | <a href="https://www.genecards.org/cgi-bin/carddisp.pl?gene=TRH">https://www.genecards.org/cgi-bin/carddisp.pl?gene=TRH</a>                   |
| UCHL1        | Ubiquitin C-Terminal Hydrolase L1                                              | Protein coding    | 51 | GC04P041256 | 2.495031357 | <a href="https://www.genecards.org/cgi-bin/carddisp.pl?gene=UCHL1">https://www.genecards.org/cgi-bin/carddisp.pl?gene=UCHL1</a>               |
| ZNF292       | Zinc Finger Protein 292                                                        | Protein coding    | 36 | GC06P087153 | 2.49156332  | <a href="https://www.genecards.org/cgi-bin/carddisp.pl?gene=ZNF292">https://www.genecards.org/cgi-bin/carddisp.pl?gene=ZNF292</a>             |
| GRM5         | Glutamate Metabotropic Receptor 5                                              | Protein coding    | 48 | GC11M088504 | 2.486018658 | <a href="https://www.genecards.org/cgi-bin/carddisp.pl?gene=GRM5">https://www.genecards.org/cgi-bin/carddisp.pl?gene=GRM5</a>                 |
| CSF3R        | Colony Stimulating Factor 3 Receptor                                           | Protein coding    | 47 | GC01M036466 | 2.481967449 | <a href="https://www.genecards.org/cgi-bin/carddisp.pl?gene=CSF3R">https://www.genecards.org/cgi-bin/carddisp.pl?gene=CSF3R</a>               |
| APOA2        | Apolipoprotein A2                                                              | Protein coding    | 44 | GC01M161222 | 2.479827881 | <a href="https://www.genecards.org/cgi-bin/carddisp.pl?gene=APOA2">https://www.genecards.org/cgi-bin/carddisp.pl?gene=APOA2</a>               |
| PFKM         | Phosphofructokinase, Muscle                                                    | Protein coding    | 50 | GC12P048105 | 2.477176428 | <a href="https://www.genecards.org/cgi-bin/carddisp.pl?gene=PFKM">https://www.genecards.org/cgi-bin/carddisp.pl?gene=PFKM</a>                 |
| MKI67        | Marker Of Proliferation Ki-67                                                  | Protein coding    | 44 | GC10M128096 | 2.476938248 | <a href="https://www.genecards.org/cgi-bin/carddisp.pl?gene=MKI67">https://www.genecards.org/cgi-bin/carddisp.pl?gene=MKI67</a>               |
| CD59         | CD59 Molecule (CD59 Blood Group)                                               | Protein coding    | 45 | GC11M033704 | 2.476097584 | <a href="https://www.genecards.org/cgi-bin/carddisp.pl?gene=CD59">https://www.genecards.org/cgi-bin/carddisp.pl?gene=CD59</a>                 |
| S100A9       | S100 Calcium Binding Protein A9                                                | Protein coding    | 42 | GC01P153357 | 2.475050449 | <a href="https://www.genecards.org/cgi-bin/carddisp.pl?gene=S100A9">https://www.genecards.org/cgi-bin/carddisp.pl?gene=S100A9</a>             |
| MMAA         | Metabolism Of Cobalamin Associated A                                           | Protein coding    | 40 | GC04P145607 | 2.474514723 | <a href="https://www.genecards.org/cgi-bin/carddisp.pl?gene=MMAA">https://www.genecards.org/cgi-bin/carddisp.pl?gene=MMAA</a>                 |
| ALDH7A1      | Aldehyde Dehydrogenase 7 Family Member A1                                      | Protein coding    | 47 | GC05M126541 | 2.473130465 | <a href="https://www.genecards.org/cgi-bin/carddisp.pl?gene=ALDH7A1">https://www.genecards.org/cgi-bin/carddisp.pl?gene=ALDH7A1</a>           |
| SPSB4        | SplA/Ryanodine Receptor Domain And SOCS Box Containing 4                       | Protein coding    | 31 | GC03P141051 | 2.470539331 | <a href="https://www.genecards.org/cgi-bin/carddisp.pl?gene=SPSB4">https://www.genecards.org/cgi-bin/carddisp.pl?gene=SPSB4</a>               |
| GAL          | Galanin And GMAP Prepropeptide                                                 | Protein coding    | 44 | GC11P068684 | 2.470417023 | <a href="https://www.genecards.org/cgi-bin/carddisp.pl?gene=GAL">https://www.genecards.org/cgi-bin/carddisp.pl?gene=GAL</a>                   |
| SLC22A3      | Solute Carrier Family 22 Member 3                                              | Protein coding    | 44 | GC06P160348 | 2.469266891 | <a href="https://www.genecards.org/cgi-bin/carddisp.pl?gene=SLC22A3">https://www.genecards.org/cgi-bin/carddisp.pl?gene=SLC22A3</a>           |
| MAG          | Myelin Associated Glycoprotein                                                 | Protein coding    | 45 | GC19P035292 | 2.466915607 | <a href="https://www.genecards.org/cgi-bin/carddisp.pl?gene=MAG">https://www.genecards.org/cgi-bin/carddisp.pl?gene=MAG</a>                   |
| STN1         | STN1 Subunit Of CST Complex                                                    | Protein coding    | 31 | GC10M103895 | 2.460392714 | <a href="https://www.genecards.org/cgi-bin/carddisp.pl?gene=STN1">https://www.genecards.org/cgi-bin/carddisp.pl?gene=STN1</a>                 |
| HPSE         | Heparanase                                                                     | Protein coding    | 44 | GC04M083292 | 2.457319736 | <a href="https://www.genecards.org/cgi-bin/carddisp.pl?gene=HPSE">https://www.genecards.org/cgi-bin/carddisp.pl?gene=HPSE</a>                 |
| CELSR2       | Cadherin EGF LAG Seven-Pass G-Type Receptor 2                                  | Protein coding    | 41 | GC01P109250 | 2.452867508 | <a href="https://www.genecards.org/cgi-bin/carddisp.pl?gene=CELSR2">https://www.genecards.org/cgi-bin/carddisp.pl?gene=CELSR2</a>             |
| TBX3         | T-Box Transcription Factor 3                                                   | Protein coding    | 45 | GC12M114670 | 2.449998379 | <a href="https://www.genecards.org/cgi-bin/carddisp.pl?gene=TBX3">https://www.genecards.org/cgi-bin/carddisp.pl?gene=TBX3</a>                 |
| ITM2B        | Integral Membrane Protein 2B                                                   | Protein coding    | 43 | GC13P048233 | 2.443171024 | <a href="https://www.genecards.org/cgi-bin/carddisp.pl?gene=ITM2B">https://www.genecards.org/cgi-bin/carddisp.pl?gene=ITM2B</a>               |
| CRYBG1       | Crystallin $\beta$ - $\gamma$ Domain Containing 1                              | Protein coding    | 25 | GC06P106361 | 2.441155195 | <a href="https://www.genecards.org/cgi-bin/carddisp.pl?gene=CRYBG1">https://www.genecards.org/cgi-bin/carddisp.pl?gene=CRYBG1</a>             |
| OXT          | Oxytocin/Neurophysin I Prepropeptide                                           | Protein coding    | 40 | GC20P003068 | 2.437024117 | <a href="https://www.genecards.org/cgi-bin/carddisp.pl?gene=OXT">https://www.genecards.org/cgi-bin/carddisp.pl?gene=OXT</a>                   |
| VEGFC        | Vascular Endothelial Growth Factor C                                           | Protein coding    | 47 | GC04M176683 | 2.435768843 | <a href="https://www.genecards.org/cgi-bin/carddisp.pl?gene=VEGFC">https://www.genecards.org/cgi-bin/carddisp.pl?gene=VEGFC</a>               |
| DRD4         | Dopamine Receptor D4                                                           | Protein coding    | 47 | GC11P001061 | 2.430494308 | <a href="https://www.genecards.org/cgi-bin/carddisp.pl?gene=DRD4">https://www.genecards.org/cgi-bin/carddisp.pl?gene=DRD4</a>                 |
| PDGFA        | Platelet Derived Growth Factor Subunit A                                       | Protein coding    | 43 | GC07M000497 | 2.426645756 | <a href="https://www.genecards.org/cgi-bin/carddisp.pl?gene=PDGFA">https://www.genecards.org/cgi-bin/carddisp.pl?gene=PDGFA</a>               |
| FLG          | Filaggrin                                                                      | Protein coding    | 40 | GC01M152274 | 2.42610693  | <a href="https://www.genecards.org/cgi-bin/carddisp.pl?gene=FLG">https://www.genecards.org/cgi-bin/carddisp.pl?gene=FLG</a>                   |
| CACNA1B      | Calcium Voltage-Gated Channel Subunit $\alpha$ 1 B                             | Protein coding    | 49 | GC09P137877 | 2.424849033 | <a href="https://www.genecards.org/cgi-bin/carddisp.pl?gene=CACNA1B">https://www.genecards.org/cgi-bin/carddisp.pl?gene=CACNA1B</a>           |
| KCNK3        | Potassium Two Pore Domain Channel Subfamily K Member 3                         | Protein coding    | 50 | GC02P026692 | 2.424816608 | <a href="https://www.genecards.org/cgi-bin/carddisp.pl?gene=KCNK3">https://www.genecards.org/cgi-bin/carddisp.pl?gene=KCNK3</a>               |
| CYBRD1       | Cytochrome B Reductase 1                                                       | Protein coding    | 40 | GC02P171522 | 2.422753811 | <a href="https://www.genecards.org/cgi-bin/carddisp.pl?gene=CYBRD1">https://www.genecards.org/cgi-bin/carddisp.pl?gene=CYBRD1</a>             |
| CHRNA4       | Cholinergic Receptor Nicotinic $\alpha$ 4 Subunit                              | Protein coding    | 49 | GC20M063343 | 2.42237854  | <a href="https://www.genecards.org/cgi-bin/carddisp.pl?gene=CHRNA4">https://www.genecards.org/cgi-bin/carddisp.pl?gene=CHRNA4</a>             |
| LOC110673971 | CYP11B2 Promoter                                                               | Biological region | 1  | GC08P142917 | 2.419398785 | <a href="https://www.genecards.org/cgi-bin/carddisp.pl?gene=LOC110673971">https://www.genecards.org/cgi-bin/carddisp.pl?gene=LOC110673971</a> |
| MAOB         | Monoamine Oxidase B                                                            | Protein coding    | 43 | GC0XM043766 | 2.409998178 | <a href="https://www.genecards.org/cgi-bin/carddisp.pl?gene=MAOB">https://www.genecards.org/cgi-bin/carddisp.pl?gene=MAOB</a>                 |
| ADAMTS2      | ADAM Metallopeptidase With Thrombospondin Type 1 Motif 2                       | Protein coding    | 43 | GC05M179110 | 2.407376051 | <a href="https://www.genecards.org/cgi-bin/carddisp.pl?gene=ADAMTS2">https://www.genecards.org/cgi-bin/carddisp.pl?gene=ADAMTS2</a>           |
| APCS         | Amyloid P Component, Serum                                                     | Protein coding    | 41 | GC01P159587 | 2.404732227 | <a href="https://www.genecards.org/cgi-bin/carddisp.pl?gene=APCS">https://www.genecards.org/cgi-bin/carddisp.pl?gene=APCS</a>                 |
| FOXP1        | Forkhead Box G1                                                                | Protein coding    | 43 | GC14P028766 | 2.402463913 | <a href="https://www.genecards.org/cgi-bin/carddisp.pl?gene=FOXP1">https://www.genecards.org/cgi-bin/carddisp.pl?gene=FOXP1</a>               |
| TSC2         | TSC Complex Subunit 2                                                          | Protein coding    | 50 | GC16P006190 | 2.402092934 | <a href="https://www.genecards.org/cgi-bin/carddisp.pl?gene=TSC2">https://www.genecards.org/cgi-bin/carddisp.pl?gene=TSC2</a>                 |
| WNT3         | Wnt Family Member 3                                                            | Protein coding    | 47 | GC17M046762 | 2.398211956 | <a href="https://www.genecards.org/cgi-bin/carddisp.pl?gene=WNT3">https://www.genecards.org/cgi-bin/carddisp.pl?gene=WNT3</a>                 |
| CARD8        | Caspase Recruitment Domain Family Member 8                                     | Protein coding    | 41 | GC19M048900 | 2.396899223 | <a href="https://www.genecards.org/cgi-bin/carddisp.pl?gene=CARD8">https://www.genecards.org/cgi-bin/carddisp.pl?gene=CARD8</a>               |
| LCAT         | Lecithin-Cholesterol Acyltransferase                                           | Protein coding    | 46 | GC16M067939 | 2.39626193  | <a href="https://www.genecards.org/cgi-bin/carddisp.pl?gene=LCAT">https://www.genecards.org/cgi-bin/carddisp.pl?gene=LCAT</a>                 |
| PKP2         | Plakophilin 2                                                                  | Protein coding    | 45 | GC12M032790 | 2.393494606 | <a href="https://www.genecards.org/cgi-bin/carddisp.pl?gene=PKP2">https://www.genecards.org/cgi-bin/carddisp.pl?gene=PKP2</a>                 |
| TLR7         | Toll Like Receptor 7                                                           | Protein coding    | 47 | GC0XP012867 | 2.392966509 | <a href="https://www.genecards.org/cgi-bin/carddisp.pl?gene=TLR7">https://www.genecards.org/cgi-bin/carddisp.pl?gene=TLR7</a>                 |
| PIK3CG       | Phosphatidylinositol-4,5-Bisphosphate 3-Kinase Catalytic Subunit $\gamma$      | Protein coding    | 48 | GC07P106865 | 2.39050746  | <a href="https://www.genecards.org/cgi-bin/carddisp.pl?gene=PIK3CG">https://www.genecards.org/cgi-bin/carddisp.pl?gene=PIK3CG</a>             |
| MIR195       | MicroRNA 195                                                                   | RNA gene          | 20 | GC17M007018 | 2.390054941 | <a href="https://www.genecards.org/cgi-bin/carddisp.pl?gene=MIR195">https://www.genecards.org/cgi-bin/carddisp.pl?gene=MIR195</a>             |

|          |                                                                    |                |    |             |             |                                                             |
|----------|--------------------------------------------------------------------|----------------|----|-------------|-------------|-------------------------------------------------------------|
| GSTP1    | Glutathione S-Transferase Pi 1                                     | Protein coding | 50 | GC11P067583 | 2.389478207 | https://www.genecards.org/cgi-bin/carddisp.pl?gene=GSTP1    |
| VIM      | Vimentin                                                           | Protein coding | 50 | GC10P017227 | 2.388063431 | https://www.genecards.org/cgi-bin/carddisp.pl?gene=VIM      |
| SCGN     | Secretagogin, EF-Hand Calcium Binding Protein                      | Protein coding | 37 | GC06P025652 | 2.386688232 | https://www.genecards.org/cgi-bin/carddisp.pl?gene=SCGN     |
| NFAT5    | Nuclear Factor Of Activated T Cells 5                              | Protein coding | 43 | GC16P069565 | 2.3864007   | https://www.genecards.org/cgi-bin/carddisp.pl?gene=NFAT5    |
| CARD14   | Caspase Recruitment Domain Family Member 14                        | Protein coding | 43 | GC17P080170 | 2.381175756 | https://www.genecards.org/cgi-bin/carddisp.pl?gene=CARD14   |
| MON1B    | MON1 Homolog B, Secretory Trafficking Associated                   | Protein coding | 34 | GC16P077190 | 2.381175756 | https://www.genecards.org/cgi-bin/carddisp.pl?gene=MON1B    |
| BMPR2    | Bone Morphogenetic Protein Receptor Type 2                         | Protein coding | 50 | GC02P202376 | 2.379487991 | https://www.genecards.org/cgi-bin/carddisp.pl?gene=BMPR2    |
| ATG7     | Autophagy Related 7                                                | Protein coding | 43 | GC03P011273 | 2.369612694 | https://www.genecards.org/cgi-bin/carddisp.pl?gene=ATG7     |
| ROPN1    | Rhopilin Associated Tail Protein 1                                 | Protein coding | 34 | GC03M123968 | 2.366288185 | https://www.genecards.org/cgi-bin/carddisp.pl?gene=ROPN1    |
| PTPRC    | Protein Tyrosine Phosphatase Receptor Type C                       | Protein coding | 50 | GC01P198607 | 2.365142345 | https://www.genecards.org/cgi-bin/carddisp.pl?gene=PTPRC    |
| EDN3     | Endothelin 3                                                       | Protein coding | 46 | GC20P059300 | 2.362086296 | https://www.genecards.org/cgi-bin/carddisp.pl?gene=EDN3     |
| NAA25    | N- $\alpha$ -Acetyltransferase 25, NatB Auxiliary Subunit          | Protein coding | 36 | GC12M112026 | 2.360514164 | https://www.genecards.org/cgi-bin/carddisp.pl?gene=NAA25    |
| SNHG14   | Small Nucleolar RNA Host Gene 14                                   | RNA gene       | 16 | GC15P027670 | 2.357454538 | https://www.genecards.org/cgi-bin/carddisp.pl?gene=SNHG14   |
| ZPR1     | ZPR1 Zinc Finger                                                   | Protein coding | 36 | GC11M116777 | 2.355058193 | https://www.genecards.org/cgi-bin/carddisp.pl?gene=ZPR1     |
| STRN     | Striatin                                                           | Protein coding | 40 | GC02M036815 | 2.35297966  | https://www.genecards.org/cgi-bin/carddisp.pl?gene=STRN     |
| MIRLET7I | MicroRNA Let-7i                                                    | RNA gene       | 20 | GC12P062606 | 2.352704048 | https://www.genecards.org/cgi-bin/carddisp.pl?gene=MIRLET7I |
| DOCK8    | Dedicator Of Cytokinesis 8                                         | Protein coding | 43 | GC09P000214 | 2.352644444 | https://www.genecards.org/cgi-bin/carddisp.pl?gene=DOCK8    |
| CAPN10   | Calpain 10                                                         | Protein coding | 41 | GC02P240586 | 2.349555016 | https://www.genecards.org/cgi-bin/carddisp.pl?gene=CAPN10   |
| S100A8   | S100 Calcium Binding Protein A8                                    | Protein coding | 42 | GC01M153391 | 2.349375248 | https://www.genecards.org/cgi-bin/carddisp.pl?gene=S100A8   |
| HSPA1L   | Heat Shock Protein Family A (Hsp70) Member 1 Like                  | Protein coding | 44 | GC06M031809 | 2.347002506 | https://www.genecards.org/cgi-bin/carddisp.pl?gene=HSPA1L   |
| COL4A4   | Collagen Type IV $\alpha$ 4 Chain                                  | Protein coding | 44 | GC02M226973 | 2.345821381 | https://www.genecards.org/cgi-bin/carddisp.pl?gene=COL4A4   |
| CSN3     | Casein $\kappa$                                                    | Protein coding | 34 | GC04P070242 | 2.344546318 | https://www.genecards.org/cgi-bin/carddisp.pl?gene=CSN3     |
| TYRO3    | TYRO3 Protein Tyrosine Kinase                                      | Protein coding | 47 | GC15P041557 | 2.339778662 | https://www.genecards.org/cgi-bin/carddisp.pl?gene=TYRO3    |
| DFFA     | DNA Fragmentation Factor Subunit $\alpha$                          | Protein coding | 44 | GC01M010456 | 2.339729786 | https://www.genecards.org/cgi-bin/carddisp.pl?gene=DFFA     |
| GRIA3    | Glutamate Ionotropic Receptor AMPA Type Subunit 3                  | Protein coding | 51 | GC0XP123184 | 2.333147526 | https://www.genecards.org/cgi-bin/carddisp.pl?gene=GRIA3    |
| CYP2E1   | Cytochrome P450 Family 2 Subfamily E Member 1                      | Protein coding | 45 | GC10P133520 | 2.330587864 | https://www.genecards.org/cgi-bin/carddisp.pl?gene=CYP2E1   |
| SRSF3    | Serine And Arginine Rich Splicing Factor 3                         | Protein coding | 40 | GC06P058456 | 2.328489304 | https://www.genecards.org/cgi-bin/carddisp.pl?gene=SRSF3    |
| LTB4R    | Leukotriene B4 Receptor                                            | Protein coding | 45 | GC14P024311 | 2.32291317  | https://www.genecards.org/cgi-bin/carddisp.pl?gene=LTB4R    |
| ANK2     | Ankyrin 2                                                          | Protein coding | 41 | GC04P112706 | 2.319845438 | https://www.genecards.org/cgi-bin/carddisp.pl?gene=ANK2     |
| IL16     | Interleukin 16                                                     | Protein coding | 42 | GC15P081159 | 2.318170071 | https://www.genecards.org/cgi-bin/carddisp.pl?gene=IL16     |
| ASPM     | Assembly Factor For Spindle Microtubules                           | Protein coding | 38 | GC01M197084 | 2.314853668 | https://www.genecards.org/cgi-bin/carddisp.pl?gene=ASPM     |
| HTR2C    | 5-Hydroxytryptamine Receptor 2C                                    | Protein coding | 48 | GC0XP114584 | 2.311404705 | https://www.genecards.org/cgi-bin/carddisp.pl?gene=HTR2C    |
| SYNPO    | Synaptopodin                                                       | Protein coding | 38 | GC05P150601 | 2.308113337 | https://www.genecards.org/cgi-bin/carddisp.pl?gene=SYNPO    |
| ZC3H12A  | Zinc Finger CCCH-Type Containing 12A                               | Protein coding | 36 | GC01P037474 | 2.303322315 | https://www.genecards.org/cgi-bin/carddisp.pl?gene=ZC3H12A  |
| COL5A1   | Collagen Type V $\alpha$ 1 Chain                                   | Protein coding | 45 | GC09P134641 | 2.301845312 | https://www.genecards.org/cgi-bin/carddisp.pl?gene=COL5A1   |
| CLCN2    | Chloride Voltage-Gated Channel 2                                   | Protein coding | 46 | GC03M184346 | 2.298526525 | https://www.genecards.org/cgi-bin/carddisp.pl?gene=CLCN2    |
| EGFR     | Epidermal Growth Factor Receptor                                   | Protein coding | 53 | GC07P055019 | 2.292897224 | https://www.genecards.org/cgi-bin/carddisp.pl?gene=EGFR     |
| PRKCG    | Protein Kinase C $\gamma$                                          | Protein coding | 52 | GC19P053879 | 2.292600393 | https://www.genecards.org/cgi-bin/carddisp.pl?gene=PRKCG    |
| ADRA2C   | Adrenoceptor $\alpha$ 2C                                           | Protein coding | 45 | GC04P003766 | 2.29203701  | https://www.genecards.org/cgi-bin/carddisp.pl?gene=ADRA2C   |
| NCAM1    | Neural Cell Adhesion Molecule 1                                    | Protein coding | 46 | GC11P112961 | 2.290941954 | https://www.genecards.org/cgi-bin/carddisp.pl?gene=NCAM1    |
| SLC5A2   | Solute Carrier Family 5 Member 2                                   | Protein coding | 47 | GC16P033552 | 2.289741993 | https://www.genecards.org/cgi-bin/carddisp.pl?gene=SLC5A2   |
| CHUK     | Component Of Inhibitor Of Nuclear Factor $\kappa$ B Kinase Complex | Protein coding | 52 | GC10M100188 | 2.28851223  | https://www.genecards.org/cgi-bin/carddisp.pl?gene=CHUK     |
| ALDH1L1  | Aldehyde Dehydrogenase 1 Family Member L1                          | Protein coding | 40 | GC03M126103 | 2.288434982 | https://www.genecards.org/cgi-bin/carddisp.pl?gene=ALDH1L1  |
| GUSB     | Glucuronidase $\beta$                                              | Protein coding | 47 | GC07M065960 | 2.284465551 | https://www.genecards.org/cgi-bin/carddisp.pl?gene=GUSB     |
| WDR12    | WD Repeat Domain 12                                                | Protein coding | 38 | GC02M202874 | 2.281857491 | https://www.genecards.org/cgi-bin/carddisp.pl?gene=WDR12    |
| KMT2A    | Lysine Methyltransferase 2A                                        | Protein coding | 45 | GC11P118436 | 2.281098604 | https://www.genecards.org/cgi-bin/carddisp.pl?gene=KMT2A    |
| GLUD2    | Glutamate Dehydrogenase 2                                          | Protein coding | 43 | GC0XP121047 | 2.281098604 | https://www.genecards.org/cgi-bin/carddisp.pl?gene=GLUD2    |
| MOCS2    | Molybdenum Cofactor Synthesis 2                                    | Protein coding | 42 | GC05M053095 | 2.281098604 | https://www.genecards.org/cgi-bin/carddisp.pl?gene=MOCS2    |
| NUDC     | Nuclear Distribution C, Dynein Complex Regulator                   | Protein coding | 42 | GC01P026953 | 2.281098604 | https://www.genecards.org/cgi-bin/carddisp.pl?gene=NUDC     |
| KLF4     | Kruppel Like Factor 4                                              | Protein coding | 45 | GC09M107484 | 2.27999258  | https://www.genecards.org/cgi-bin/carddisp.pl?gene=KLF4     |
| SYP      | Synaptophysin                                                      | Protein coding | 44 | GC0XM049187 | 2.279093266 | https://www.genecards.org/cgi-bin/carddisp.pl?gene=SYP      |
| SOCS3    | Suppressor Of Cytokine Signaling 3                                 | Protein coding | 44 | GC17M078356 | 2.278394222 | https://www.genecards.org/cgi-bin/carddisp.pl?gene=SOCS3    |
| MTHFS    | Methenyltetrahydrofolate Synthetase                                | Protein coding | 43 | GC15M079833 | 2.278189182 | https://www.genecards.org/cgi-bin/carddisp.pl?gene=MTHFS    |
| SUN1     | Sad1 And UNC84 Domain Containing 1                                 | Protein coding | 38 | GC07P000815 | 2.276191473 | https://www.genecards.org/cgi-bin/carddisp.pl?gene=SUN1     |
| OXA1L    | OXA1L Mitochondrial Inner Membrane Protein                         | Protein coding | 39 | GC14P022766 | 2.276071548 | https://www.genecards.org/cgi-bin/carddisp.pl?gene=OXA1L    |
| IGFBP2   | Insulin Like Growth Factor Binding Protein 2                       | Protein coding | 43 | GC02P216632 | 2.275911093 | https://www.genecards.org/cgi-bin/carddisp.pl?gene=IGFBP2   |
| PLA2G6   | Phospholipase A2 Group VI                                          | Protein coding | 48 | GC22M050884 | 2.275238991 | https://www.genecards.org/cgi-bin/carddisp.pl?gene=PLA2G6   |
| LPAL2    | Lipoprotein(A) Like 2, Pseudogene                                  | Pseudogene     | 26 | GC06M160453 | 2.273447037 | https://www.genecards.org/cgi-bin/carddisp.pl?gene=LPAL2    |
| SPTBN5   | Spectrin $\beta$ , Non-Erythrocytic 5                              | Protein coding | 35 | GC15M041848 | 2.272842407 | https://www.genecards.org/cgi-bin/carddisp.pl?gene=SPTBN5   |
| OPTN     | Optineurin                                                         | Protein coding | 44 | GC10P013099 | 2.269617558 | https://www.genecards.org/cgi-bin/carddisp.pl?gene=OPTN     |
| CST9L    | Cystatin 9 Like                                                    | Protein coding | 36 | GC20M023545 | 2.268769026 | https://www.genecards.org/cgi-bin/carddisp.pl?gene=CST9L    |
| CST8     | Cystatin 8                                                         | Protein coding | 36 | GC20P023491 | 2.268769026 | https://www.genecards.org/cgi-bin/carddisp.pl?gene=CST8     |
| IL5      | Interleukin 5                                                      | Protein coding | 44 | GC05M132541 | 2.267925024 | https://www.genecards.org/cgi-bin/carddisp.pl?gene=IL5      |
| PRRT2    | Proline Rich Transmembrane Protein 2                               | Protein coding | 38 | GC16P029811 | 2.267467976 | https://www.genecards.org/cgi-bin/carddisp.pl?gene=PRRT2    |
| MIR33A   | MicroRNA 33a                                                       | RNA gene       | 19 | GC22P041900 | 2.267467976 | https://www.genecards.org/cgi-bin/carddisp.pl?gene=MIR33A   |
| AMBP     | $\alpha$ -1-Microglobulin/Bikunin Precursor                        | Protein coding | 41 | GC09M114060 | 2.266134739 | https://www.genecards.org/cgi-bin/carddisp.pl?gene=AMBP     |
| MIR125B2 | MicroRNA 125b-2                                                    | RNA gene       | 22 | GC21P016590 | 2.260219574 | https://www.genecards.org/cgi-bin/carddisp.pl?gene=MIR125B2 |
| CYP19A1  | Cytochrome P450 Family 19 Subfamily A Member 1                     | Protein coding | 49 | GC15M051208 | 2.258968353 | https://www.genecards.org/cgi-bin/carddisp.pl?gene=CYP19A1  |
| LPXN     | Leupaxin                                                           | Protein coding | 40 | GC11M071338 | 2.256958723 | https://www.genecards.org/cgi-bin/carddisp.pl?gene=LPXN     |
| VDAC1    | Voltage Dependent Anion Channel 1                                  | Protein coding | 45 | GC05M133975 | 2.256471634 | https://www.genecards.org/cgi-bin/carddisp.pl?gene=VDAC1    |
| TAGLN    | Transgelin                                                         | Protein coding | 43 | GC11P117199 | 2.254525661 | https://www.genecards.org/cgi-bin/carddisp.pl?gene=TAGLN    |
| CXCL1    | C-X-C Motif Chemokine Ligand 1                                     | Protein coding | 43 | GC04P073869 | 2.249398232 | https://www.genecards.org/cgi-bin/carddisp.pl?gene=CXCL1    |
| CDC5L    | Cell Division Cycle 5 Like                                         | Protein coding | 40 | GC06P044387 | 2.243990421 | https://www.genecards.org/cgi-bin/carddisp.pl?gene=CDC5L    |
| TNIP1    | TNFAIP3 Interacting Protein 1                                      | Protein coding | 41 | GC05M151029 | 2.243969202 | https://www.genecards.org/cgi-bin/carddisp.pl?gene=TNIP1    |
| ADK      | Adenosine Kinase                                                   | Protein coding | 50 | GC10P074152 | 2.24307251  | https://www.genecards.org/cgi-bin/carddisp.pl?gene=ADK      |
| CNNM2    | Cyclin And CBS Domain Divalent Metal Cation Transport Mediator 2   | Protein coding | 42 | GC10P102918 | 2.241807461 | https://www.genecards.org/cgi-bin/carddisp.pl?gene=CNNM2    |

|              |                                                                                                   |                |    |             |             |                                                                 |
|--------------|---------------------------------------------------------------------------------------------------|----------------|----|-------------|-------------|-----------------------------------------------------------------|
| ETS1         | ETS Proto-Oncogene 1, Transcription Factor                                                        | Protein coding | 48 | GC11M128458 | 2.240116358 | https://www.genecards.org/cgi-bin/carddisp.pl?gene=ETS1         |
| MMAB         | Metabolism Of Cobalamin Associated B                                                              | Protein coding | 45 | GC12M109553 | 2.239818811 | https://www.genecards.org/cgi-bin/carddisp.pl?gene=MMAB         |
| PPP3CA       | Protein Phosphatase 3 Catalytic Subunit $\alpha$                                                  | Protein coding | 52 | GC04M101024 | 2.239688158 | https://www.genecards.org/cgi-bin/carddisp.pl?gene=PPP3CA       |
| ACPI         | Acid Phosphatase 1                                                                                | Protein coding | 43 | GC02P000254 | 2.239408255 | https://www.genecards.org/cgi-bin/carddisp.pl?gene=ACPI         |
| ADCY10       | Adenylate Cyclase 10                                                                              | Protein coding | 45 | GC01M167809 | 2.238815784 | https://www.genecards.org/cgi-bin/carddisp.pl?gene=ADCY10       |
| CACNB2       | Calcium Voltage-Gated Channel Auxiliary Subunit $\beta$ 2                                         | Protein coding | 47 | GC10P018165 | 2.237946033 | https://www.genecards.org/cgi-bin/carddisp.pl?gene=CACNB2       |
| ENPEP        | Glutamyl Aminopeptidase                                                                           | Protein coding | 44 | GC04P110365 | 2.237845182 | https://www.genecards.org/cgi-bin/carddisp.pl?gene=ENPEP        |
| IL1RL1       | Interleukin 1 Receptor Like 1                                                                     | Protein coding | 40 | GC02P102294 | 2.235427856 | https://www.genecards.org/cgi-bin/carddisp.pl?gene=IL1RL1       |
| CD8A         | CD8a Molecule                                                                                     | Protein coding | 46 | GC02M086784 | 2.234191895 | https://www.genecards.org/cgi-bin/carddisp.pl?gene=CD8A         |
| PNPO         | Pyridoxamine 5'-Phosphate Oxidase                                                                 | Protein coding | 45 | GC17P047941 | 2.234079838 | https://www.genecards.org/cgi-bin/carddisp.pl?gene=PNPO         |
| ROCK2        | Rho Associated Coiled-Coil Containing Protein Kinase 2                                            | Protein coding | 47 | GC02M011240 | 2.232777119 | https://www.genecards.org/cgi-bin/carddisp.pl?gene=ROCK2        |
| APAF1        | Apoptotic Peptidase Activating Factor 1                                                           | Protein coding | 47 | GC12P098645 | 2.232755899 | https://www.genecards.org/cgi-bin/carddisp.pl?gene=APAF1        |
| TUBB3        | Tubulin $\beta$ 3 Class III                                                                       | Protein coding | 48 | GC16P089922 | 2.232222557 | https://www.genecards.org/cgi-bin/carddisp.pl?gene=TUBB3        |
| TIMD4        | T Cell Immunoglobulin And Mucin Domain Containing 4                                               | Protein coding | 36 | GC05M156919 | 2.228131294 | https://www.genecards.org/cgi-bin/carddisp.pl?gene=TIMD4        |
| IBSP         | Integrin Binding Sialoprotein                                                                     | Protein coding | 37 | GC04P087799 | 2.227115154 | https://www.genecards.org/cgi-bin/carddisp.pl?gene=IBSP         |
| HCRT         | Hypocretin Neuropeptide Precursor                                                                 | Protein coding | 41 | GC17M042185 | 2.217495441 | https://www.genecards.org/cgi-bin/carddisp.pl?gene=HCRT         |
| SPTAN1       | Spectrin $\alpha$ , Non-Erythrocytic 1                                                            | Protein coding | 48 | GC09P128552 | 2.217483997 | https://www.genecards.org/cgi-bin/carddisp.pl?gene=SPTAN1       |
| LDB3         | LIM Domain Binding 3                                                                              | Protein coding | 41 | GC10P086666 | 2.21192503  | https://www.genecards.org/cgi-bin/carddisp.pl?gene=LDB3         |
| CREBBP       | CREB Binding Protein                                                                              | Protein coding | 52 | GC16M004002 | 2.206712723 | https://www.genecards.org/cgi-bin/carddisp.pl?gene=CREBBP       |
| LINC01394    | Long Intergenic Non-Protein Coding RNA 1394                                                       | RNA gene       | 9  | GC06M001208 | 2.204988718 | https://www.genecards.org/cgi-bin/carddisp.pl?gene=LINC01394    |
| TTF2         | Transcription Termination Factor 2                                                                | Protein coding | 40 | GC01P117060 | 2.204286575 | https://www.genecards.org/cgi-bin/carddisp.pl?gene=TTF2         |
| OSM          | Oncostatin M                                                                                      | Protein coding | 41 | GC22M030262 | 2.204276085 | https://www.genecards.org/cgi-bin/carddisp.pl?gene=OSM          |
| PAWR         | Pro-Apoptotic WT1 Regulator                                                                       | Protein coding | 41 | GC12M079574 | 2.20374918  | https://www.genecards.org/cgi-bin/carddisp.pl?gene=PAWR         |
| MIR206       | MicroRNA 206                                                                                      | RNA gene       | 21 | GC06P052144 | 2.201489687 | https://www.genecards.org/cgi-bin/carddisp.pl?gene=MIR206       |
| GZMB         | Granzyme B                                                                                        | Protein coding | 45 | GC14M024630 | 2.200712681 | https://www.genecards.org/cgi-bin/carddisp.pl?gene=GZMB         |
| GFER         | Growth Factor, Augmenter Of Liver Regeneration                                                    | Protein coding | 44 | GC16P001984 | 2.197028399 | https://www.genecards.org/cgi-bin/carddisp.pl?gene=GFER         |
| MIR29C       | MicroRNA 29c                                                                                      | RNA gene       | 19 | GC01M207802 | 2.191455364 | https://www.genecards.org/cgi-bin/carddisp.pl?gene=MIR29C       |
| PEAR1        | Platelet Endothelial Aggregation Receptor 1                                                       | Protein coding | 36 | GC01P156893 | 2.189505816 | https://www.genecards.org/cgi-bin/carddisp.pl?gene=PEAR1        |
| TERC         | Telomerase RNA Component                                                                          | RNA gene       | 29 | GC03M169765 | 2.187264442 | https://www.genecards.org/cgi-bin/carddisp.pl?gene=TERC         |
| C3AR1        | Complement C3a Receptor 1                                                                         | Protein coding | 44 | GC12M008058 | 2.185493946 | https://www.genecards.org/cgi-bin/carddisp.pl?gene=C3AR1        |
| AMPD3        | Adenosine Monophosphate Deaminase 3                                                               | Protein coding | 45 | GC11P010309 | 2.185393333 | https://www.genecards.org/cgi-bin/carddisp.pl?gene=AMPD3        |
| FADS2        | Fatty Acid Desaturase 2                                                                           | Protein coding | 44 | GC11P061792 | 2.179516077 | https://www.genecards.org/cgi-bin/carddisp.pl?gene=FADS2        |
| FXN          | Frataxin                                                                                          | Protein coding | 46 | GC09P069035 | 2.178533077 | https://www.genecards.org/cgi-bin/carddisp.pl?gene=FXN          |
| MIR130A      | MicroRNA 130a                                                                                     | RNA gene       | 20 | GC11P057641 | 2.177936554 | https://www.genecards.org/cgi-bin/carddisp.pl?gene=MIR130A      |
| ACYP2        | Acyolphosphatase 2                                                                                | Protein coding | 40 | GC02P053970 | 2.177241325 | https://www.genecards.org/cgi-bin/carddisp.pl?gene=ACYP2        |
| NRIP2        | Nuclear Receptor Interacting Protein 2                                                            | Protein coding | 36 | GC12M002824 | 2.176455021 | https://www.genecards.org/cgi-bin/carddisp.pl?gene=NRIP2        |
| UFSP2        | UFM1 Specific Peptidase 2                                                                         | Protein coding | 39 | GC04M185399 | 2.173690557 | https://www.genecards.org/cgi-bin/carddisp.pl?gene=UFSP2        |
| TNFAIP3      | TNF $\alpha$ Induced Protein 3                                                                    | Protein coding | 48 | GC06P137866 | 2.172752142 | https://www.genecards.org/cgi-bin/carddisp.pl?gene=TNFAIP3      |
| FST          | Follistatin                                                                                       | Protein coding | 46 | GC05P053480 | 2.172357321 | https://www.genecards.org/cgi-bin/carddisp.pl?gene=FST          |
| TNFRSF11A    | TNF Receptor Superfamily Member 11a                                                               | Protein coding | 45 | GC18P062325 | 2.170055866 | https://www.genecards.org/cgi-bin/carddisp.pl?gene=TNFRSF11A    |
| FCN1         | Ficolin 1                                                                                         | Protein coding | 40 | GC09M135040 | 2.168426752 | https://www.genecards.org/cgi-bin/carddisp.pl?gene=FCN1         |
| NKX2-1       | NK2 Homeobox 1                                                                                    | Protein coding | 46 | GC14M036516 | 2.168112993 | https://www.genecards.org/cgi-bin/carddisp.pl?gene=NKX2-1       |
| ITGAV        | Integrin Subunit $\alpha$ V                                                                       | Protein coding | 47 | GC02P186589 | 2.167337179 | https://www.genecards.org/cgi-bin/carddisp.pl?gene=ITGAV        |
| BIRC5        | Baculoviral IAP Repeat Containing 5                                                               | Protein coding | 46 | GC17P078214 | 2.164391041 | https://www.genecards.org/cgi-bin/carddisp.pl?gene=BIRC5        |
| NEAT1        | Nuclear Paraspeckle Assembly Transcript 1                                                         | RNA gene       | 23 | GC11P066811 | 2.161044359 | https://www.genecards.org/cgi-bin/carddisp.pl?gene=NEAT1        |
| ITGAE        | Integrin Subunit $\alpha$ E                                                                       | Protein coding | 40 | GC17M003722 | 2.157740593 | https://www.genecards.org/cgi-bin/carddisp.pl?gene=ITGAE        |
| HSPB2        | Heat Shock Protein Family B (Small) Member 2                                                      | Protein coding | 40 | GC11P111913 | 2.157273054 | https://www.genecards.org/cgi-bin/carddisp.pl?gene=HSPB2        |
| WNK3         | WNK Lysine Deficient Protein Kinase 3                                                             | Protein coding | 40 | GC0XM054207 | 2.155707359 | https://www.genecards.org/cgi-bin/carddisp.pl?gene=WNK3         |
| XKR6         | XK Related 6                                                                                      | Protein coding | 32 | GC08M010896 | 2.153495073 | https://www.genecards.org/cgi-bin/carddisp.pl?gene=XKR6         |
| P2RX7        | Purinergic Receptor P2X 7                                                                         | Protein coding | 45 | GC12P123863 | 2.152783394 | https://www.genecards.org/cgi-bin/carddisp.pl?gene=P2RX7        |
| PRKCE        | Protein Kinase C $\epsilon$                                                                       | Protein coding | 49 | GC02P045651 | 2.15172863  | https://www.genecards.org/cgi-bin/carddisp.pl?gene=PRKCE        |
| UGCG         | UDP-Glucose Ceramide Glucosyltransferase                                                          | Protein coding | 43 | GC09P111896 | 2.14874959  | https://www.genecards.org/cgi-bin/carddisp.pl?gene=UGCG         |
| SMARCA2      | SWI/SNF Related, Matrix Associated, Actin Dependent Regulator Of Chromatin, Subfamily A, Member 2 | Protein coding | 50 | GC09P001980 | 2.148426771 | https://www.genecards.org/cgi-bin/carddisp.pl?gene=SMARCA2      |
| ABCD2        | ATP Binding Cassette Subfamily D Member 2                                                         | Protein coding | 41 | GC12M039530 | 2.148335218 | https://www.genecards.org/cgi-bin/carddisp.pl?gene=ABCD2        |
| CDK4         | Cyclin Dependent Kinase 4                                                                         | Protein coding | 53 | GC12M057743 | 2.148146868 | https://www.genecards.org/cgi-bin/carddisp.pl?gene=CDK4         |
| PEMT         | Phosphatidylethanolamine N-Methyltransferase                                                      | Protein coding | 41 | GC17M017506 | 2.147951603 | https://www.genecards.org/cgi-bin/carddisp.pl?gene=PEMT         |
| CTSK         | Cathepsin K                                                                                       | Protein coding | 49 | GC01M150876 | 2.147244692 | https://www.genecards.org/cgi-bin/carddisp.pl?gene=CTSK         |
| POMT2        | Protein O-Mannosyltransferase 2                                                                   | Protein coding | 43 | GC14M077274 | 2.145932913 | https://www.genecards.org/cgi-bin/carddisp.pl?gene=POMT2        |
| COL5A2       | Collagen Type V $\alpha$ 2 Chain                                                                  | Protein coding | 42 | GC02M189031 | 2.139962912 | https://www.genecards.org/cgi-bin/carddisp.pl?gene=COL5A2       |
| ADRA1A       | Adrenoceptor $\alpha$ 1A                                                                          | Protein coding | 47 | GC08M026747 | 2.138268709 | https://www.genecards.org/cgi-bin/carddisp.pl?gene=ADRA1A       |
| CR2          | Complement C3d Receptor 2                                                                         | Protein coding | 45 | GC01P207454 | 2.137906551 | https://www.genecards.org/cgi-bin/carddisp.pl?gene=CR2          |
| MIR130B      | MicroRNA 130b                                                                                     | RNA gene       | 18 | GC22P027760 | 2.137248516 | https://www.genecards.org/cgi-bin/carddisp.pl?gene=MIR130B      |
| NFATC1       | Nuclear Factor Of Activated T Cells 1                                                             | Protein coding | 48 | GC18P079395 | 2.132640123 | https://www.genecards.org/cgi-bin/carddisp.pl?gene=NFATC1       |
| MTHFD1       | Methylenetetrahydrofolate Dehydrogenase, Cyclohydrolase And Formyltetrahydrofolate Synthetase 1   | Protein coding | 45 | GC14P064388 | 2.132539749 | https://www.genecards.org/cgi-bin/carddisp.pl?gene=MTHFD1       |
| SLC6A2       | Solute Carrier Family 6 Member 2                                                                  | Protein coding | 48 | GC16P055656 | 2.131088495 | https://www.genecards.org/cgi-bin/carddisp.pl?gene=SLC6A2       |
| PAFAH1B1     | Platelet Activating Factor Acetylhydrolase 1b Regulatory Subunit 1                                | Protein coding | 45 | GC17P002593 | 2.129851103 | https://www.genecards.org/cgi-bin/carddisp.pl?gene=PAFAH1B1     |
| LOC102724058 | Uncharacterized LOC102724058                                                                      | RNA gene       | 6  | GC02P165958 | 2.127529621 | https://www.genecards.org/cgi-bin/carddisp.pl?gene=LOC102724058 |
| TJP1         | Tight Junction Protein 1                                                                          | Protein coding | 44 | GC15M029699 | 2.12569499  | https://www.genecards.org/cgi-bin/carddisp.pl?gene=TJP1         |
| RASD1        | Ras Related Dexamethasone Induced 1                                                               | Protein coding | 40 | GC17M017494 | 2.120362282 | https://www.genecards.org/cgi-bin/carddisp.pl?gene=RASD1        |
| PLPP3        | Phospholipid Phosphatase 3                                                                        | Protein coding | 35 | GC01M056495 | 2.120362282 | https://www.genecards.org/cgi-bin/carddisp.pl?gene=PLPP3        |
| NPPC         | Natriuretic Peptide C                                                                             | Protein coding | 40 | GC02M231921 | 2.120230198 | https://www.genecards.org/cgi-bin/carddisp.pl?gene=NPPC         |
| PRKCA        | Protein Kinase C $\alpha$                                                                         | Protein coding | 51 | GC17P066302 | 2.118850708 | https://www.genecards.org/cgi-bin/carddisp.pl?gene=PRKCA        |
| TOX          | Thymocyte Selection Associated High Mobility Group Box                                            | Protein coding | 40 | GC08M058791 | 2.118283749 | https://www.genecards.org/cgi-bin/carddisp.pl?gene=TOX          |
| NTSC2        | 5'-Nucleotidase, Cytosolic II                                                                     | Protein coding | 46 | GC10M103088 | 2.113830566 | https://www.genecards.org/cgi-bin/carddisp.pl?gene=NTSC2        |

|           |                                                             |                |    |             |             |                                                                                                                                         |
|-----------|-------------------------------------------------------------|----------------|----|-------------|-------------|-----------------------------------------------------------------------------------------------------------------------------------------|
| FAM205A   | Family With Sequence Similarity 205 Member A                | Protein coding | 26 | GC09M034723 | 2.113005877 | <a href="https://www.genecards.org/cgi-bin/carddisp.pl?gene=FAM205A">https://www.genecards.org/cgi-bin/carddisp.pl?gene=FAM205A</a>     |
| FHIP1A    | FHF Complex Subunit HOOK Interacting Protein 1A             | Protein coding | 21 | GC04P151411 | 2.113005877 | <a href="https://www.genecards.org/cgi-bin/carddisp.pl?gene=FHIP1A">https://www.genecards.org/cgi-bin/carddisp.pl?gene=FHIP1A</a>       |
| ADNP      | Activity Dependent Neuroprotector Homeobox                  | Protein coding | 42 | GC20M050888 | 2.111311674 | <a href="https://www.genecards.org/cgi-bin/carddisp.pl?gene=ADNP">https://www.genecards.org/cgi-bin/carddisp.pl?gene=ADNP</a>           |
| ADAMTS18  | ADAM Metallopeptidase With Thrombospondin Type 1 Motif 18   | Protein coding | 44 | GC16M077316 | 2.109141111 | <a href="https://www.genecards.org/cgi-bin/carddisp.pl?gene=ADAMTS18">https://www.genecards.org/cgi-bin/carddisp.pl?gene=ADAMTS18</a>   |
| FCGR2B    | Fc Fragment Of IgG Receptor IIb                             | Protein coding | 47 | GC01P161663 | 2.105943918 | <a href="https://www.genecards.org/cgi-bin/carddisp.pl?gene=FCGR2B">https://www.genecards.org/cgi-bin/carddisp.pl?gene=FCGR2B</a>       |
| GDAP1     | Ganglioside Induced Differentiation Associated Protein 1    | Protein coding | 43 | GC08P074315 | 2.105943918 | <a href="https://www.genecards.org/cgi-bin/carddisp.pl?gene=GDAP1">https://www.genecards.org/cgi-bin/carddisp.pl?gene=GDAP1</a>         |
| FCAR      | Fc Fragment Of IgA Receptor                                 | Protein coding | 41 | GC19P057016 | 2.10304904  | <a href="https://www.genecards.org/cgi-bin/carddisp.pl?gene=FCAR">https://www.genecards.org/cgi-bin/carddisp.pl?gene=FCAR</a>           |
| VEGFB     | Vascular Endothelial Growth Factor B                        | Protein coding | 44 | GC11P064234 | 2.101142883 | <a href="https://www.genecards.org/cgi-bin/carddisp.pl?gene=VEGFB">https://www.genecards.org/cgi-bin/carddisp.pl?gene=VEGFB</a>         |
| RPS6KA3   | Ribosomal Protein S6 Kinase A3                              | Protein coding | 52 | GC0XM020149 | 2.099988222 | <a href="https://www.genecards.org/cgi-bin/carddisp.pl?gene=RPS6KA3">https://www.genecards.org/cgi-bin/carddisp.pl?gene=RPS6KA3</a>     |
| SLC39A7   | Solute Carrier Family 39 Member 7                           | Protein coding | 41 | GC06P033200 | 2.096572161 | <a href="https://www.genecards.org/cgi-bin/carddisp.pl?gene=SLC39A7">https://www.genecards.org/cgi-bin/carddisp.pl?gene=SLC39A7</a>     |
| AQP10     | Aquaporin 10                                                | Protein coding | 37 | GC01P154321 | 2.096572161 | <a href="https://www.genecards.org/cgi-bin/carddisp.pl?gene=AQP10">https://www.genecards.org/cgi-bin/carddisp.pl?gene=AQP10</a>         |
| TAS2R50   | Taste 2 Receptor Member 50                                  | Protein coding | 33 | GC12M010985 | 2.096572161 | <a href="https://www.genecards.org/cgi-bin/carddisp.pl?gene=TAS2R50">https://www.genecards.org/cgi-bin/carddisp.pl?gene=TAS2R50</a>     |
| NFKBIA    | NFKB Inhibitor $\alpha$                                     | Protein coding | 50 | GC14M035401 | 2.094538212 | <a href="https://www.genecards.org/cgi-bin/carddisp.pl?gene=NFKBIA">https://www.genecards.org/cgi-bin/carddisp.pl?gene=NFKBIA</a>       |
| CKB       | Creatine Kinase B                                           | Protein coding | 45 | GC14M103519 | 2.09376359  | <a href="https://www.genecards.org/cgi-bin/carddisp.pl?gene=CKB">https://www.genecards.org/cgi-bin/carddisp.pl?gene=CKB</a>             |
| CKM       | Creatine Kinase, M-Type                                     | Protein coding | 44 | GC19M045306 | 2.091287613 | <a href="https://www.genecards.org/cgi-bin/carddisp.pl?gene=CKM">https://www.genecards.org/cgi-bin/carddisp.pl?gene=CKM</a>             |
| EPHA4     | EPH Receptor A4                                             | Protein coding | 50 | GC02M221418 | 2.087696314 | <a href="https://www.genecards.org/cgi-bin/carddisp.pl?gene=EPHA4">https://www.genecards.org/cgi-bin/carddisp.pl?gene=EPHA4</a>         |
| IL20      | Interleukin 20                                              | Protein coding | 38 | GC01P206866 | 2.085718155 | <a href="https://www.genecards.org/cgi-bin/carddisp.pl?gene=IL20">https://www.genecards.org/cgi-bin/carddisp.pl?gene=IL20</a>           |
| KRT5      | Keratin 5                                                   | Protein coding | 47 | GC12M052514 | 2.085172653 | <a href="https://www.genecards.org/cgi-bin/carddisp.pl?gene=KRT5">https://www.genecards.org/cgi-bin/carddisp.pl?gene=KRT5</a>           |
| DCC       | DCC Netrin 1 Receptor                                       | Protein coding | 46 | GC18P052340 | 2.085172653 | <a href="https://www.genecards.org/cgi-bin/carddisp.pl?gene=DCC">https://www.genecards.org/cgi-bin/carddisp.pl?gene=DCC</a>             |
| ALOX12B   | Arachidonate 12-Lipoxygenase, 12R Type                      | Protein coding | 43 | GC17M009337 | 2.085172653 | <a href="https://www.genecards.org/cgi-bin/carddisp.pl?gene=ALOX12B">https://www.genecards.org/cgi-bin/carddisp.pl?gene=ALOX12B</a>     |
| MLF1      | Myeloid Leukemia Factor 1                                   | Protein coding | 43 | GC03P158571 | 2.085172653 | <a href="https://www.genecards.org/cgi-bin/carddisp.pl?gene=MLF1">https://www.genecards.org/cgi-bin/carddisp.pl?gene=MLF1</a>           |
| SERPINB8  | Serpin Family B Member 8                                    | Protein coding | 43 | GC18P063969 | 2.085172653 | <a href="https://www.genecards.org/cgi-bin/carddisp.pl?gene=SERPINB8">https://www.genecards.org/cgi-bin/carddisp.pl?gene=SERPINB8</a>   |
| P2RX6     | Purinergic Receptor P2X 6                                   | Protein coding | 42 | GC22P021222 | 2.085172653 | <a href="https://www.genecards.org/cgi-bin/carddisp.pl?gene=P2RX6">https://www.genecards.org/cgi-bin/carddisp.pl?gene=P2RX6</a>         |
| SLC26A8   | Solute Carrier Family 26 Member 8                           | Protein coding | 41 | GC06M049262 | 2.085172653 | <a href="https://www.genecards.org/cgi-bin/carddisp.pl?gene=SLC26A8">https://www.genecards.org/cgi-bin/carddisp.pl?gene=SLC26A8</a>     |
| TAF3      | TATA-Box Binding Protein Associated Factor 3                | Protein coding | 39 | GC10P007860 | 2.085172653 | <a href="https://www.genecards.org/cgi-bin/carddisp.pl?gene=TAF3">https://www.genecards.org/cgi-bin/carddisp.pl?gene=TAF3</a>           |
| VTI1A     | Vesicle Transport Through Interaction With T-SNAREs 1A      | Protein coding | 39 | GC10P112446 | 2.085172653 | <a href="https://www.genecards.org/cgi-bin/carddisp.pl?gene=VTI1A">https://www.genecards.org/cgi-bin/carddisp.pl?gene=VTI1A</a>         |
| MCM10     | Minichromosome Maintenance 10 Replication Initiation Factor | Protein coding | 38 | GC10P013161 | 2.085172653 | <a href="https://www.genecards.org/cgi-bin/carddisp.pl?gene=MCM10">https://www.genecards.org/cgi-bin/carddisp.pl?gene=MCM10</a>         |
| KRT74     | Keratin 74                                                  | Protein coding | 37 | GC12M052565 | 2.085172653 | <a href="https://www.genecards.org/cgi-bin/carddisp.pl?gene=KRT74">https://www.genecards.org/cgi-bin/carddisp.pl?gene=KRT74</a>         |
| PGLYRP2   | Peptidoglycan Recognition Protein 2                         | Protein coding | 37 | GC19M015468 | 2.085172653 | <a href="https://www.genecards.org/cgi-bin/carddisp.pl?gene=PGLYRP2">https://www.genecards.org/cgi-bin/carddisp.pl?gene=PGLYRP2</a>     |
| DMXL2     | Dmx Like 2                                                  | Protein coding | 36 | GC15M051447 | 2.085172653 | <a href="https://www.genecards.org/cgi-bin/carddisp.pl?gene=DMXL2">https://www.genecards.org/cgi-bin/carddisp.pl?gene=DMXL2</a>         |
| FCRLB     | Fc Receptor Like B                                          | Protein coding | 35 | GC01P161721 | 2.085172653 | <a href="https://www.genecards.org/cgi-bin/carddisp.pl?gene=FCRLB">https://www.genecards.org/cgi-bin/carddisp.pl?gene=FCRLB</a>         |
| FSTL4     | Follistatin Like 4                                          | Protein coding | 34 | GC05M133196 | 2.085172653 | <a href="https://www.genecards.org/cgi-bin/carddisp.pl?gene=FSTL4">https://www.genecards.org/cgi-bin/carddisp.pl?gene=FSTL4</a>         |
| SGIP1     | SH3GL Interacting Endocytic Adaptor 1                       | Protein coding | 34 | GC01P066533 | 2.085172653 | <a href="https://www.genecards.org/cgi-bin/carddisp.pl?gene=SGIP1">https://www.genecards.org/cgi-bin/carddisp.pl?gene=SGIP1</a>         |
| HEATR5B   | HEAT Repeat Containing 5B                                   | Protein coding | 33 | GC02M036949 | 2.085172653 | <a href="https://www.genecards.org/cgi-bin/carddisp.pl?gene=HEATR5B">https://www.genecards.org/cgi-bin/carddisp.pl?gene=HEATR5B</a>     |
| TMPRSS11B | Transmembrane Serine Protease 11B                           | Protein coding | 33 | GC04M068226 | 2.085172653 | <a href="https://www.genecards.org/cgi-bin/carddisp.pl?gene=TMPRSS11B">https://www.genecards.org/cgi-bin/carddisp.pl?gene=TMPRSS11B</a> |
| WDR31     | WD Repeat Domain 31                                         | Protein coding | 33 | GC09M113313 | 2.085172653 | <a href="https://www.genecards.org/cgi-bin/carddisp.pl?gene=WDR31">https://www.genecards.org/cgi-bin/carddisp.pl?gene=WDR31</a>         |
| MYOM3     | Myomesin 3                                                  | Protein coding | 32 | GC01M024056 | 2.085172653 | <a href="https://www.genecards.org/cgi-bin/carddisp.pl?gene=MYOM3">https://www.genecards.org/cgi-bin/carddisp.pl?gene=MYOM3</a>         |
| ZNF132    | Zinc Finger Protein 132                                     | Protein coding | 32 | GC19M058432 | 2.085172653 | <a href="https://www.genecards.org/cgi-bin/carddisp.pl?gene=ZNF132">https://www.genecards.org/cgi-bin/carddisp.pl?gene=ZNF132</a>       |
| OR13G1    | Olfactory Receptor Family 13 Subfamily G Member 1           | Protein coding | 31 | GC01M247672 | 2.085172653 | <a href="https://www.genecards.org/cgi-bin/carddisp.pl?gene=OR13G1">https://www.genecards.org/cgi-bin/carddisp.pl?gene=OR13G1</a>       |
| OR2A25    | Olfactory Receptor Family 2 Subfamily A Member 25           | Protein coding | 31 | GC07P146125 | 2.085172653 | <a href="https://www.genecards.org/cgi-bin/carddisp.pl?gene=OR2A25">https://www.genecards.org/cgi-bin/carddisp.pl?gene=OR2A25</a>       |
| WDR55     | WD Repeat Domain 55                                         | Protein coding | 31 | GC05P144337 | 2.085172653 | <a href="https://www.genecards.org/cgi-bin/carddisp.pl?gene=WDR55">https://www.genecards.org/cgi-bin/carddisp.pl?gene=WDR55</a>         |
| LGALS14   | Galectin 14                                                 | Protein coding | 30 | GC19P039704 | 2.085172653 | <a href="https://www.genecards.org/cgi-bin/carddisp.pl?gene=LGALS14">https://www.genecards.org/cgi-bin/carddisp.pl?gene=LGALS14</a>     |
| LY6G5B    | Lymphocyte Antigen 6 Family Member G5B                      | Protein coding | 29 | GC06P058316 | 2.085172653 | <a href="https://www.genecards.org/cgi-bin/carddisp.pl?gene=LY6G5B">https://www.genecards.org/cgi-bin/carddisp.pl?gene=LY6G5B</a>       |
| RPLP0P4   | Ribosomal Protein Lateral Stalk Subunit P0 Pseudogene 4     | Pseudogene     | 7  | GC01P153198 | 2.085172653 | <a href="https://www.genecards.org/cgi-bin/carddisp.pl?gene=RPLP0P4">https://www.genecards.org/cgi-bin/carddisp.pl?gene=RPLP0P4</a>     |
| ITGA3     | Integrin Subunit $\alpha$ 3                                 | Protein coding | 47 | GC17P050055 | 2.085023403 | <a href="https://www.genecards.org/cgi-bin/carddisp.pl?gene=ITGA3">https://www.genecards.org/cgi-bin/carddisp.pl?gene=ITGA3</a>         |
| NPTX1     | Neuronal Pentraxin 1                                        | Protein coding | 38 | GC17M080466 | 2.084607363 | <a href="https://www.genecards.org/cgi-bin/carddisp.pl?gene=NPTX1">https://www.genecards.org/cgi-bin/carddisp.pl?gene=NPTX1</a>         |
| DEFB4A    | Defensin $\beta$ 4A                                         | Protein coding | 36 | GC08P007895 | 2.084520102 | <a href="https://www.genecards.org/cgi-bin/carddisp.pl?gene=DEFB4A">https://www.genecards.org/cgi-bin/carddisp.pl?gene=DEFB4A</a>       |
| SOX9      | SRY-Box Transcription Factor 9                              | Protein coding | 47 | GC17P072121 | 2.082202911 | <a href="https://www.genecards.org/cgi-bin/carddisp.pl?gene=SOX9">https://www.genecards.org/cgi-bin/carddisp.pl?gene=SOX9</a>           |
| LBR       | Lamin B Receptor                                            | Protein coding | 48 | GC01M225401 | 2.079694033 | <a href="https://www.genecards.org/cgi-bin/carddisp.pl?gene=LBR">https://www.genecards.org/cgi-bin/carddisp.pl?gene=LBR</a>             |
| TCN2      | Transcobalamin 2                                            | Protein coding | 44 | GC22P030606 | 2.077836514 | <a href="https://www.genecards.org/cgi-bin/carddisp.pl?gene=TCN2">https://www.genecards.org/cgi-bin/carddisp.pl?gene=TCN2</a>           |
| IVD       | Isovaleryl-CoA Dehydrogenase                                | Protein coding | 45 | GC15P040405 | 2.077306747 | <a href="https://www.genecards.org/cgi-bin/carddisp.pl?gene=IVD">https://www.genecards.org/cgi-bin/carddisp.pl?gene=IVD</a>             |
| ZFP30     | ZFP30 Zinc Finger Protein                                   | Protein coding | 35 | GC19M037613 | 2.077306747 | <a href="https://www.genecards.org/cgi-bin/carddisp.pl?gene=ZFP30">https://www.genecards.org/cgi-bin/carddisp.pl?gene=ZFP30</a>         |
| GAS5-AS1  | GAS5 Antisense RNA 1                                        | RNA gene       | 13 | GC01P173863 | 2.074144602 | <a href="https://www.genecards.org/cgi-bin/carddisp.pl?gene=GAS5-AS1">https://www.genecards.org/cgi-bin/carddisp.pl?gene=GAS5-AS1</a>   |
| ICOSLG    | Inducible T Cell Costimulator Ligand                        | Protein coding | 38 | GC21M044222 | 2.073806524 | <a href="https://www.genecards.org/cgi-bin/carddisp.pl?gene=ICOSLG">https://www.genecards.org/cgi-bin/carddisp.pl?gene=ICOSLG</a>       |
| PANK2     | Pantothenate Kinase 2                                       | Protein coding | 44 | GC20P003887 | 2.073583126 | <a href="https://www.genecards.org/cgi-bin/carddisp.pl?gene=PANK2">https://www.genecards.org/cgi-bin/carddisp.pl?gene=PANK2</a>         |
| PRDM16    | PR/SET Domain 16                                            | Protein coding | 45 | GC01P003068 | 2.073039532 | <a href="https://www.genecards.org/cgi-bin/carddisp.pl?gene=PRDM16">https://www.genecards.org/cgi-bin/carddisp.pl?gene=PRDM16</a>       |
| OGG1      | 8-Oxoguanine DNA Glycosylase                                | Protein coding | 45 | GC03P009816 | 2.071639061 | <a href="https://www.genecards.org/cgi-bin/carddisp.pl?gene=OGG1">https://www.genecards.org/cgi-bin/carddisp.pl?gene=OGG1</a>           |
| SLC2A6    | Solute Carrier Family 2 Member 6                            | Protein coding | 41 | GC09M133471 | 2.067724228 | <a href="https://www.genecards.org/cgi-bin/carddisp.pl?gene=SLC2A6">https://www.genecards.org/cgi-bin/carddisp.pl?gene=SLC2A6</a>       |
| CXCL10    | C-X-C Motif Chemokine Ligand 10                             | Protein coding | 44 | GC04M076021 | 2.06397891  | <a href="https://www.genecards.org/cgi-bin/carddisp.pl?gene=CXCL10">https://www.genecards.org/cgi-bin/carddisp.pl?gene=CXCL10</a>       |
| NF2       | Neurofibromin 2                                             | Protein coding | 48 | GC22P029603 | 2.061370373 | <a href="https://www.genecards.org/cgi-bin/carddisp.pl?gene=NF2">https://www.genecards.org/cgi-bin/carddisp.pl?gene=NF2</a>             |
| UCP1      | Uncoupling Protein 1                                        | Protein coding | 44 | GC04M140559 | 2.05989027  | <a href="https://www.genecards.org/cgi-bin/carddisp.pl?gene=UCP1">https://www.genecards.org/cgi-bin/carddisp.pl?gene=UCP1</a>           |
| HSPB8     | Heat Shock Protein Family B (Small) Member 8                | Protein coding | 44 | GC12P119173 | 2.059034586 | <a href="https://www.genecards.org/cgi-bin/carddisp.pl?gene=HSPB8">https://www.genecards.org/cgi-bin/carddisp.pl?gene=HSPB8</a>         |
| GJB1      | Gap Junction Protein $\beta$ 1                              | Protein coding | 47 | GC0XP071212 | 2.054889917 | <a href="https://www.genecards.org/cgi-bin/carddisp.pl?gene=GJB1">https://www.genecards.org/cgi-bin/carddisp.pl?gene=GJB1</a>           |
| SCARB1    | Scavenger Receptor Class B Member 1                         | Protein coding | 45 | GC12M124776 | 2.053256035 | <a href="https://www.genecards.org/cgi-bin/carddisp.pl?gene=SCARB1">https://www.genecards.org/cgi-bin/carddisp.pl?gene=SCARB1</a>       |
| RAMP2     | Receptor Activity Modifying Protein 2                       | Protein coding | 41 | GC17P042758 | 2.052038908 | <a href="https://www.genecards.org/cgi-bin/carddisp.pl?gene=RAMP2">https://www.genecards.org/cgi-bin/carddisp.pl?gene=RAMP2</a>         |
| MEF2C     | Myocyte Enhancer Factor 2C                                  | Protein coding | 49 | GC05M088718 | 2.051256657 | <a href="https://www.genecards.org/cgi-bin/carddisp.pl?gene=MEF2C">https://www.genecards.org/cgi-bin/carddisp.pl?gene=MEF2C</a>         |
| GCLM      | Glutamate-Cysteine Ligase Modifier Subunit                  | Protein coding | 41 | GC01M093885 | 2.050646544 | <a href="https://www.genecards.org/cgi-bin/carddisp.pl?gene=GCLM">https://www.genecards.org/cgi-bin/carddisp.pl?gene=GCLM</a>           |
| RASIP1    | Ras Interacting Protein 1                                   | Protein coding | 37 | GC19M048720 | 2.050500631 | <a href="https://www.genecards.org/cgi-bin/carddisp.pl?gene=RASIP1">https://www.genecards.org/cgi-bin/carddisp.pl?gene=RASIP1</a>       |
| STAT1     | Signal Transducer And Activator Of Transcription 1          | Protein coding | 52 | GC02M190908 | 2.047232628 | <a href="https://www.genecards.org/cgi-bin/carddisp.pl?gene=STAT1">https://www.genecards.org/cgi-bin/carddisp.pl?gene=STAT1</a>         |
| CTSD      | Cathepsin D                                                 | Protein coding | 51 | GC11M001752 | 2.046490431 | <a href="https://www.genecards.org/cgi-bin/carddisp.pl?gene=CTSD">https://www.genecards.org/cgi-bin/carddisp.pl?gene=CTSD</a>           |
| TNC       | Tenascin C                                                  | Protein coding | 49 | GC09M115019 | 2.046169758 | <a href="https://www.genecards.org/cgi-bin/carddisp.pl?gene=TNC">https://www.genecards.org/cgi-bin/carddisp.pl?gene=TNC</a>             |
| GALC      | Galactosylceramidase                                        | Protein coding | 44 | GC14M087837 | 2.046153307 | <a href="https://www.genecards.org/cgi-bin/carddisp.pl?gene=GALC">https://www.genecards.org/cgi-bin/carddisp.pl?gene=GALC</a>           |
| RPS6KA2   | Ribosomal Protein S6 Kinase A2                              | Protein coding | 47 | GC06M166409 | 2.043493271 | <a href="https://www.genecards.org/cgi-bin/carddisp.pl?gene=RPS6KA2">https://www.genecards.org/cgi-bin/carddisp.pl?gene=RPS6KA2</a>     |
| PPIG      | Peptidylprolyl Isomerase G                                  | Protein coding | 41 | GC02P169584 | 2.042293549 | <a href="https://www.genecards.org/cgi-bin/carddisp.pl?gene=PPIG">https://www.genecards.org/cgi-bin/carddisp.pl?gene=PPIG</a>           |
| P2RX4     | Purinergic Receptor P2X 4                                   | Protein coding | 43 | GC12P123865 | 2.040742159 | <a href="https://www.genecards.org/cgi-bin/carddisp.pl?gene=P2RX4">https://www.genecards.org/cgi-bin/carddisp.pl?gene=P2RX4</a>         |
| TSHR      | Thyroid Stimulating Hormone Receptor                        | Protein coding | 47 | GC14P080954 | 2.040725946 | <a href="https://www.genecards.org/cgi-bin/carddisp.pl?gene=TSHR">https://www.genecards.org/cgi-bin/carddisp.pl?gene=TSHR</a>           |

|           |                                                                                  |                |    |             |             |                                                                                                                                         |
|-----------|----------------------------------------------------------------------------------|----------------|----|-------------|-------------|-----------------------------------------------------------------------------------------------------------------------------------------|
| M6PR      | Mannose-6-Phosphate Receptor, Cation Dependent                                   | Protein coding | 43 | GC12M008976 | 2.039159298 | <a href="https://www.genecards.org/cgi-bin/carddisp.pl?gene=M6PR">https://www.genecards.org/cgi-bin/carddisp.pl?gene=M6PR</a>           |
| APOC1     | Apolipoprotein C1                                                                | Protein coding | 40 | GC19P044914 | 2.038874865 | <a href="https://www.genecards.org/cgi-bin/carddisp.pl?gene=APOC1">https://www.genecards.org/cgi-bin/carddisp.pl?gene=APOC1</a>         |
| HPX       | Hemopexin                                                                        | Protein coding | 39 | GC11M006435 | 2.038487434 | <a href="https://www.genecards.org/cgi-bin/carddisp.pl?gene=HPX">https://www.genecards.org/cgi-bin/carddisp.pl?gene=HPX</a>             |
| SLPI      | Secretory Leukocyte Peptidase Inhibitor                                          | Protein coding | 39 | GC20M045252 | 2.037778616 | <a href="https://www.genecards.org/cgi-bin/carddisp.pl?gene=SLPI">https://www.genecards.org/cgi-bin/carddisp.pl?gene=SLPI</a>           |
| TFRC      | Transferrin Receptor                                                             | Protein coding | 48 | GC03M196027 | 2.03729558  | <a href="https://www.genecards.org/cgi-bin/carddisp.pl?gene=TFRC">https://www.genecards.org/cgi-bin/carddisp.pl?gene=TFRC</a>           |
| COX5A     | Cytochrome C Oxidase Subunit 5A                                                  | Protein coding | 44 | GC15M074919 | 2.035711527 | <a href="https://www.genecards.org/cgi-bin/carddisp.pl?gene=COX5A">https://www.genecards.org/cgi-bin/carddisp.pl?gene=COX5A</a>         |
| ITPR1     | Inositol 1,4,5-Trisphosphate Receptor Type 1                                     | Protein coding | 48 | GC03P004486 | 2.032258511 | <a href="https://www.genecards.org/cgi-bin/carddisp.pl?gene=ITPR1">https://www.genecards.org/cgi-bin/carddisp.pl?gene=ITPR1</a>         |
| MIR124-3  | MicroRNA 124-3                                                                   | RNA gene       | 18 | GC20P063180 | 2.032237053 | <a href="https://www.genecards.org/cgi-bin/carddisp.pl?gene=MIR124-3">https://www.genecards.org/cgi-bin/carddisp.pl?gene=MIR124-3</a>   |
| IDH2      | Isocitrate Dehydrogenase (NADP(+)) 2                                             | Protein coding | 52 | GC15M090083 | 2.030665159 | <a href="https://www.genecards.org/cgi-bin/carddisp.pl?gene=IDH2">https://www.genecards.org/cgi-bin/carddisp.pl?gene=IDH2</a>           |
| GAP43     | Growth Associated Protein 43                                                     | Protein coding | 43 | GC03P115623 | 2.026215792 | <a href="https://www.genecards.org/cgi-bin/carddisp.pl?gene=GAP43">https://www.genecards.org/cgi-bin/carddisp.pl?gene=GAP43</a>         |
| PRKAA1    | Protein Kinase AMP-Activated Catalytic Subunit $\alpha$ 1                        | Protein coding | 47 | GC05M040759 | 2.026132107 | <a href="https://www.genecards.org/cgi-bin/carddisp.pl?gene=PRKAA1">https://www.genecards.org/cgi-bin/carddisp.pl?gene=PRKAA1</a>       |
| GATA1     | GATA Binding Protein 1                                                           | Protein coding | 47 | GC0XP048786 | 2.023926973 | <a href="https://www.genecards.org/cgi-bin/carddisp.pl?gene=GATA1">https://www.genecards.org/cgi-bin/carddisp.pl?gene=GATA1</a>         |
| SLC12A1   | Solute Carrier Family 12 Member 1                                                | Protein coding | 47 | GC15P048191 | 2.023681164 | <a href="https://www.genecards.org/cgi-bin/carddisp.pl?gene=SLC12A1">https://www.genecards.org/cgi-bin/carddisp.pl?gene=SLC12A1</a>     |
| ARG2      | Arginase 2                                                                       | Protein coding | 45 | GC14P067619 | 2.023047924 | <a href="https://www.genecards.org/cgi-bin/carddisp.pl?gene=ARG2">https://www.genecards.org/cgi-bin/carddisp.pl?gene=ARG2</a>           |
| CXCR3     | C-X-C Motif Chemokine Receptor 3                                                 | Protein coding | 44 | GC0XM071615 | 2.016802073 | <a href="https://www.genecards.org/cgi-bin/carddisp.pl?gene=CXCR3">https://www.genecards.org/cgi-bin/carddisp.pl?gene=CXCR3</a>         |
| PENK      | Proenkephalin                                                                    | Protein coding | 38 | GC08M056436 | 2.013073444 | <a href="https://www.genecards.org/cgi-bin/carddisp.pl?gene=PENK">https://www.genecards.org/cgi-bin/carddisp.pl?gene=PENK</a>           |
| PNOC      | Prepronociceptin                                                                 | Protein coding | 37 | GC08P028316 | 2.011604786 | <a href="https://www.genecards.org/cgi-bin/carddisp.pl?gene=PNOC">https://www.genecards.org/cgi-bin/carddisp.pl?gene=PNOC</a>           |
| PHF6      | PHD Finger Protein 6                                                             | Protein coding | 40 | GC0XP134373 | 2.003304482 | <a href="https://www.genecards.org/cgi-bin/carddisp.pl?gene=PHF6">https://www.genecards.org/cgi-bin/carddisp.pl?gene=PHF6</a>           |
| PTPRF     | Protein Tyrosine Phosphatase Receptor Type F                                     | Protein coding | 50 | GC01P043527 | 1.998403549 | <a href="https://www.genecards.org/cgi-bin/carddisp.pl?gene=PTPRF">https://www.genecards.org/cgi-bin/carddisp.pl?gene=PTPRF</a>         |
| CGAS      | Cyclic GMP-AMP Synthase                                                          | Protein coding | 30 | GC06M073414 | 1.996276021 | <a href="https://www.genecards.org/cgi-bin/carddisp.pl?gene=CGAS">https://www.genecards.org/cgi-bin/carddisp.pl?gene=CGAS</a>           |
| SOAT1     | Sterol O-Acyltransferase 1                                                       | Protein coding | 45 | GC01P179262 | 1.994888544 | <a href="https://www.genecards.org/cgi-bin/carddisp.pl?gene=SOAT1">https://www.genecards.org/cgi-bin/carddisp.pl?gene=SOAT1</a>         |
| MYOCD     | Myocardin                                                                        | Protein coding | 41 | GC17P012665 | 1.993364692 | <a href="https://www.genecards.org/cgi-bin/carddisp.pl?gene=MYOCD">https://www.genecards.org/cgi-bin/carddisp.pl?gene=MYOCD</a>         |
| LAMA3     | Laminin Subunit $\alpha$ 3                                                       | Protein coding | 44 | GC18P023689 | 1.991608143 | <a href="https://www.genecards.org/cgi-bin/carddisp.pl?gene=LAMA3">https://www.genecards.org/cgi-bin/carddisp.pl?gene=LAMA3</a>         |
| GRIK1     | Glutamate Ionotropic Receptor Kainate Type Subunit 1                             | Protein coding | 45 | GC21M029536 | 1.990653038 | <a href="https://www.genecards.org/cgi-bin/carddisp.pl?gene=GRIK1">https://www.genecards.org/cgi-bin/carddisp.pl?gene=GRIK1</a>         |
| P4HB      | Prolyl 4-Hydroxylase Subunit $\beta$                                             | Protein coding | 48 | GC17M081843 | 1.984768152 | <a href="https://www.genecards.org/cgi-bin/carddisp.pl?gene=P4HB">https://www.genecards.org/cgi-bin/carddisp.pl?gene=P4HB</a>           |
| CDKN3     | Cyclin Dependent Kinase Inhibitor 3                                              | Protein coding | 42 | GC14P054398 | 1.984120607 | <a href="https://www.genecards.org/cgi-bin/carddisp.pl?gene=CDKN3">https://www.genecards.org/cgi-bin/carddisp.pl?gene=CDKN3</a>         |
| ADIPOR2   | Adiponectin Receptor 2                                                           | Protein coding | 43 | GC12P001670 | 1.984009147 | <a href="https://www.genecards.org/cgi-bin/carddisp.pl?gene=ADIPOR2">https://www.genecards.org/cgi-bin/carddisp.pl?gene=ADIPOR2</a>     |
| NPHS2     | NPHS2 Stomatin Family Member, Podocin                                            | Protein coding | 41 | GC01M179519 | 1.983668447 | <a href="https://www.genecards.org/cgi-bin/carddisp.pl?gene=NPHS2">https://www.genecards.org/cgi-bin/carddisp.pl?gene=NPHS2</a>         |
| IL36RN    | Interleukin 36 Receptor Antagonist                                               | Protein coding | 41 | GC02P117301 | 1.982546568 | <a href="https://www.genecards.org/cgi-bin/carddisp.pl?gene=IL36RN">https://www.genecards.org/cgi-bin/carddisp.pl?gene=IL36RN</a>       |
| KRT14     | Keratin 14                                                                       | Protein coding | 47 | GC17M041582 | 1.980618477 | <a href="https://www.genecards.org/cgi-bin/carddisp.pl?gene=KRT14">https://www.genecards.org/cgi-bin/carddisp.pl?gene=KRT14</a>         |
| MYL3      | Myosin Light Chain 3                                                             | Protein coding | 45 | GC03M046836 | 1.97770226  | <a href="https://www.genecards.org/cgi-bin/carddisp.pl?gene=MYL3">https://www.genecards.org/cgi-bin/carddisp.pl?gene=MYL3</a>           |
| MED13L    | Mediator Complex Subunit 13L                                                     | Protein coding | 39 | GC12M115953 | 1.977229357 | <a href="https://www.genecards.org/cgi-bin/carddisp.pl?gene=MED13L">https://www.genecards.org/cgi-bin/carddisp.pl?gene=MED13L</a>       |
| MIR602    | MicroRNA 602                                                                     | RNA gene       | 14 | GC09P137838 | 1.977099299 | <a href="https://www.genecards.org/cgi-bin/carddisp.pl?gene=MIR602">https://www.genecards.org/cgi-bin/carddisp.pl?gene=MIR602</a>       |
| SAA4      | Serum Amyloid A4, Constitutive                                                   | Protein coding | 39 | GC11M018234 | 1.974173546 | <a href="https://www.genecards.org/cgi-bin/carddisp.pl?gene=SAA4">https://www.genecards.org/cgi-bin/carddisp.pl?gene=SAA4</a>           |
| PMS2      | PMS1 Homolog 2, Mismatch Repair System Component                                 | Protein coding | 48 | GC07M005973 | 1.971558213 | <a href="https://www.genecards.org/cgi-bin/carddisp.pl?gene=PMS2">https://www.genecards.org/cgi-bin/carddisp.pl?gene=PMS2</a>           |
| HYOU1     | Hypoxia Up-Regulated 1                                                           | Protein coding | 44 | GC11M119047 | 1.969953775 | <a href="https://www.genecards.org/cgi-bin/carddisp.pl?gene=HYOU1">https://www.genecards.org/cgi-bin/carddisp.pl?gene=HYOU1</a>         |
| ARL6IP6   | ADP Ribosylation Factor Like GTPase 6 Interacting Protein 6                      | Protein coding | 34 | GC02P152717 | 1.968505574 | <a href="https://www.genecards.org/cgi-bin/carddisp.pl?gene=ARL6IP6">https://www.genecards.org/cgi-bin/carddisp.pl?gene=ARL6IP6</a>     |
| AQP9      | Aquaporin 9                                                                      | Protein coding | 44 | GC15P058138 | 1.968424439 | <a href="https://www.genecards.org/cgi-bin/carddisp.pl?gene=AQP9">https://www.genecards.org/cgi-bin/carddisp.pl?gene=AQP9</a>           |
| KIF5A     | Kinesin Family Member 5A                                                         | Protein coding | 45 | GC12P057549 | 1.964168787 | <a href="https://www.genecards.org/cgi-bin/carddisp.pl?gene=KIF5A">https://www.genecards.org/cgi-bin/carddisp.pl?gene=KIF5A</a>         |
| DAXX      | Death Domain Associated Protein                                                  | Protein coding | 44 | GC06M033318 | 1.963004112 | <a href="https://www.genecards.org/cgi-bin/carddisp.pl?gene=DAXX">https://www.genecards.org/cgi-bin/carddisp.pl?gene=DAXX</a>           |
| GOSR2     | Golgi SNAP Receptor Complex Member 2                                             | Protein coding | 43 | GC17P046924 | 1.956336379 | <a href="https://www.genecards.org/cgi-bin/carddisp.pl?gene=GOSR2">https://www.genecards.org/cgi-bin/carddisp.pl?gene=GOSR2</a>         |
| GUCY1B1   | Guanylate Cyclase 1 Soluble Subunit $\beta$ 1                                    | Protein coding | 34 | GC04P155759 | 1.956069112 | <a href="https://www.genecards.org/cgi-bin/carddisp.pl?gene=GUCY1B1">https://www.genecards.org/cgi-bin/carddisp.pl?gene=GUCY1B1</a>     |
| CFTR      | CF Transmembrane Conductance Regulator                                           | Protein coding | 51 | GC07P117287 | 1.955135465 | <a href="https://www.genecards.org/cgi-bin/carddisp.pl?gene=CFTR">https://www.genecards.org/cgi-bin/carddisp.pl?gene=CFTR</a>           |
| ABL1      | ABL Proto-Oncogene 1, Non-Receptor Tyrosine Kinase                               | Protein coding | 52 | GC09P130713 | 1.954412937 | <a href="https://www.genecards.org/cgi-bin/carddisp.pl?gene=ABL1">https://www.genecards.org/cgi-bin/carddisp.pl?gene=ABL1</a>           |
| IFNA2     | Interferon $\alpha$ 2                                                            | Protein coding | 41 | GC09M021384 | 1.950749874 | <a href="https://www.genecards.org/cgi-bin/carddisp.pl?gene=IFNA2">https://www.genecards.org/cgi-bin/carddisp.pl?gene=IFNA2</a>         |
| VSTM4     | V-Set And Transmembrane Domain Containing 4                                      | Protein coding | 31 | GC10M049014 | 1.948404908 | <a href="https://www.genecards.org/cgi-bin/carddisp.pl?gene=VSTM4">https://www.genecards.org/cgi-bin/carddisp.pl?gene=VSTM4</a>         |
| RASA1     | RAS P21 Protein Activator 1                                                      | Protein coding | 47 | GC05P087267 | 1.939755321 | <a href="https://www.genecards.org/cgi-bin/carddisp.pl?gene=RASA1">https://www.genecards.org/cgi-bin/carddisp.pl?gene=RASA1</a>         |
| PDP1      | Pyruvate Dehydrogenase Phosphatase Catalytic Subunit 1                           | Protein coding | 46 | GC08P093857 | 1.938275337 | <a href="https://www.genecards.org/cgi-bin/carddisp.pl?gene=PDP1">https://www.genecards.org/cgi-bin/carddisp.pl?gene=PDP1</a>           |
| ARID1B    | AT-Rich Interaction Domain 1B                                                    | Protein coding | 44 | GC06P156777 | 1.938056231 | <a href="https://www.genecards.org/cgi-bin/carddisp.pl?gene=ARID1B">https://www.genecards.org/cgi-bin/carddisp.pl?gene=ARID1B</a>       |
| HLA-DQA1  | Major Histocompatibility Complex, Class II, DQ $\alpha$ 1                        | Protein coding | 43 | GC06P058340 | 1.937764049 | <a href="https://www.genecards.org/cgi-bin/carddisp.pl?gene=HLA-DQA1">https://www.genecards.org/cgi-bin/carddisp.pl?gene=HLA-DQA1</a>   |
| HADHA     | Hydroxyacyl-CoA Dehydrogenase Trifunctional Multienzyme Complex Subunit $\alpha$ | Protein coding | 46 | GC02M026190 | 1.935912848 | <a href="https://www.genecards.org/cgi-bin/carddisp.pl?gene=HADHA">https://www.genecards.org/cgi-bin/carddisp.pl?gene=HADHA</a>         |
| CYP11A1   | Cytochrome P450 Family 11 Subfamily A Member 1                                   | Protein coding | 50 | GC15M074337 | 1.934395194 | <a href="https://www.genecards.org/cgi-bin/carddisp.pl?gene=CYP11A1">https://www.genecards.org/cgi-bin/carddisp.pl?gene=CYP11A1</a>     |
| HK1       | Hexokinase 1                                                                     | Protein coding | 50 | GC10P069269 | 1.933717728 | <a href="https://www.genecards.org/cgi-bin/carddisp.pl?gene=HK1">https://www.genecards.org/cgi-bin/carddisp.pl?gene=HK1</a>             |
| LTF       | Lactotransferrin                                                                 | Protein coding | 44 | GC03M046435 | 1.930118084 | <a href="https://www.genecards.org/cgi-bin/carddisp.pl?gene=LTF">https://www.genecards.org/cgi-bin/carddisp.pl?gene=LTF</a>             |
| PRDX1     | Peroxisedoxin 1                                                                  | Protein coding | 48 | GC01M045511 | 1.927305222 | <a href="https://www.genecards.org/cgi-bin/carddisp.pl?gene=PRDX1">https://www.genecards.org/cgi-bin/carddisp.pl?gene=PRDX1</a>         |
| VTN       | Vitronectin                                                                      | Protein coding | 43 | GC17M031461 | 1.926832914 | <a href="https://www.genecards.org/cgi-bin/carddisp.pl?gene=VTN">https://www.genecards.org/cgi-bin/carddisp.pl?gene=VTN</a>             |
| FABP1     | Fatty Acid Binding Protein 1                                                     | Protein coding | 43 | GC02M088122 | 1.925750256 | <a href="https://www.genecards.org/cgi-bin/carddisp.pl?gene=FABP1">https://www.genecards.org/cgi-bin/carddisp.pl?gene=FABP1</a>         |
| DCTN1     | Dynactin Subunit 1                                                               | Protein coding | 47 | GC02M074361 | 1.924680948 | <a href="https://www.genecards.org/cgi-bin/carddisp.pl?gene=DCTN1">https://www.genecards.org/cgi-bin/carddisp.pl?gene=DCTN1</a>         |
| BCL2L11   | BCL2 Like 11                                                                     | Protein coding | 44 | GC02P111119 | 1.923215985 | <a href="https://www.genecards.org/cgi-bin/carddisp.pl?gene=BCL2L11">https://www.genecards.org/cgi-bin/carddisp.pl?gene=BCL2L11</a>     |
| DNASE1    | Deoxyribonuclease 1                                                              | Protein coding | 42 | GC16P003611 | 1.918616891 | <a href="https://www.genecards.org/cgi-bin/carddisp.pl?gene=DNASE1">https://www.genecards.org/cgi-bin/carddisp.pl?gene=DNASE1</a>       |
| PLAU      | Plasminogen Activator, Urokinase                                                 | Protein coding | 51 | GC10P073909 | 1.918292284 | <a href="https://www.genecards.org/cgi-bin/carddisp.pl?gene=PLAU">https://www.genecards.org/cgi-bin/carddisp.pl?gene=PLAU</a>           |
| SNAP25    | Synapsome Associated Protein 25                                                  | Protein coding | 50 | GC20P010218 | 1.916278124 | <a href="https://www.genecards.org/cgi-bin/carddisp.pl?gene=SNAP25">https://www.genecards.org/cgi-bin/carddisp.pl?gene=SNAP25</a>       |
| SLC4A4    | Solute Carrier Family 4 Member 4                                                 | Protein coding | 46 | GC04P071063 | 1.915493727 | <a href="https://www.genecards.org/cgi-bin/carddisp.pl?gene=SLC4A4">https://www.genecards.org/cgi-bin/carddisp.pl?gene=SLC4A4</a>       |
| SLC17A3   | Solute Carrier Family 17 Member 3                                                | Protein coding | 40 | GC06M025833 | 1.911699891 | <a href="https://www.genecards.org/cgi-bin/carddisp.pl?gene=SLC17A3">https://www.genecards.org/cgi-bin/carddisp.pl?gene=SLC17A3</a>     |
| APOM      | Apolipoprotein M                                                                 | Protein coding | 39 | GC06P058317 | 1.910730362 | <a href="https://www.genecards.org/cgi-bin/carddisp.pl?gene=APOM">https://www.genecards.org/cgi-bin/carddisp.pl?gene=APOM</a>           |
| TLL5      | Tubulin Tyrosine Ligase Like 5                                                   | Protein coding | 39 | GC14P075633 | 1.909897566 | <a href="https://www.genecards.org/cgi-bin/carddisp.pl?gene=TLL5">https://www.genecards.org/cgi-bin/carddisp.pl?gene=TLL5</a>           |
| ERRFI1    | ERBB Receptor Feedback Inhibitor 1                                               | Protein coding | 37 | GC01M008004 | 1.909897566 | <a href="https://www.genecards.org/cgi-bin/carddisp.pl?gene=ERRFI1">https://www.genecards.org/cgi-bin/carddisp.pl?gene=ERRFI1</a>       |
| SHISA6    | Shisa Family Member 6                                                            | Protein coding | 34 | GC17P011241 | 1.909897566 | <a href="https://www.genecards.org/cgi-bin/carddisp.pl?gene=SHISA6">https://www.genecards.org/cgi-bin/carddisp.pl?gene=SHISA6</a>       |
| TMEM163   | Transmembrane Protein 163                                                        | Protein coding | 33 | GC02M134455 | 1.909897566 | <a href="https://www.genecards.org/cgi-bin/carddisp.pl?gene=TMEM163">https://www.genecards.org/cgi-bin/carddisp.pl?gene=TMEM163</a>     |
| ZDHHC22   | Zinc Finger DHHC-Type Palmitoyltransferase 22                                    | Protein coding | 29 | GC14M077127 | 1.909897566 | <a href="https://www.genecards.org/cgi-bin/carddisp.pl?gene=ZDHHC22">https://www.genecards.org/cgi-bin/carddisp.pl?gene=ZDHHC22</a>     |
| OBI1      | ORC Ubiquitin Ligase 1                                                           | Protein coding | 27 | GC13M078615 | 1.909897566 | <a href="https://www.genecards.org/cgi-bin/carddisp.pl?gene=OBI1">https://www.genecards.org/cgi-bin/carddisp.pl?gene=OBI1</a>           |
| LINC02113 | Long Intergenic Non-Protein Coding RNA 2113                                      | RNA gene       | 8  | GC05P099533 | 1.909897566 | <a href="https://www.genecards.org/cgi-bin/carddisp.pl?gene=LINC02113">https://www.genecards.org/cgi-bin/carddisp.pl?gene=LINC02113</a> |
| MRAS      | Muscle RAS Oncogene Homolog                                                      | Protein coding | 46 | GC03P138347 | 1.90858674  | <a href="https://www.genecards.org/cgi-bin/carddisp.pl?gene=MRAS">https://www.genecards.org/cgi-bin/carddisp.pl?gene=MRAS</a>           |
| HDAC4     | Histone Deacetylase 4                                                            | Protein coding | 51 | GC02M239048 | 1.905430555 | <a href="https://www.genecards.org/cgi-bin/carddisp.pl?gene=HDAC4">https://www.genecards.org/cgi-bin/carddisp.pl?gene=HDAC4</a>         |
| FOXO1     | Forkhead Box O1                                                                  | Protein coding | 48 | GC13M040555 | 1.903076649 | <a href="https://www.genecards.org/cgi-bin/carddisp.pl?gene=FOXO1">https://www.genecards.org/cgi-bin/carddisp.pl?gene=FOXO1</a>         |
| DIAPH1    | Diaphanous Related Formin 1                                                      | Protein coding | 48 | GC05M141516 | 1.900167704 | <a href="https://www.genecards.org/cgi-bin/carddisp.pl?gene=DIAPH1">https://www.genecards.org/cgi-bin/carddisp.pl?gene=DIAPH1</a>       |

|          |                                                                  |                |    |             |             |                                                             |
|----------|------------------------------------------------------------------|----------------|----|-------------|-------------|-------------------------------------------------------------|
| DDAH2    | Dimethylarginine Dimethylaminohydrolase 2                        | Protein coding | 43 | GC06M031727 | 1.900105    | https://www.genecards.org/cgi-bin/carddisp.pl?gene=DDAH2    |
| NFIA     | Nuclear Factor I A                                               | Protein coding | 45 | GC01P060865 | 1.899688244 | https://www.genecards.org/cgi-bin/carddisp.pl?gene=NFIA     |
| PINK1    | PTEN Induced Kinase 1                                            | Protein coding | 47 | GC01P020634 | 1.898255587 | https://www.genecards.org/cgi-bin/carddisp.pl?gene=PINK1    |
| U2AF1    | U2 Small Nuclear RNA Auxiliary Factor 1                          | Protein coding | 43 | GC21M043092 | 1.897751212 | https://www.genecards.org/cgi-bin/carddisp.pl?gene=U2AF1    |
| OPRD1    | Opioid Receptor $\delta$ 1                                       | Protein coding | 44 | GC01P028812 | 1.896843076 | https://www.genecards.org/cgi-bin/carddisp.pl?gene=OPRD1    |
| SIGMAR1  | $\varsigma$ Non-Opioid Intracellular Receptor 1                  | Protein coding | 47 | GC09M034634 | 1.896831036 | https://www.genecards.org/cgi-bin/carddisp.pl?gene=SIGMAR1  |
| CHEK2    | Checkpoint Kinase 2                                              | Protein coding | 53 | GC22M028687 | 1.896424532 | https://www.genecards.org/cgi-bin/carddisp.pl?gene=CHEK2    |
| SFTPA1   | Surfactant Protein A1                                            | Protein coding | 42 | GC10P086660 | 1.894661069 | https://www.genecards.org/cgi-bin/carddisp.pl?gene=SFTPA1   |
| CD86     | CD86 Molecule                                                    | Protein coding | 43 | GC03P122055 | 1.892393112 | https://www.genecards.org/cgi-bin/carddisp.pl?gene=CD86     |
| GOLGB1   | Golgin B1                                                        | Protein coding | 36 | GC03M121663 | 1.892030478 | https://www.genecards.org/cgi-bin/carddisp.pl?gene=GOLGB1   |
| HAVCR2   | Hepatitis A Virus Cellular Receptor 2                            | Protein coding | 43 | GC05M157063 | 1.891290903 | https://www.genecards.org/cgi-bin/carddisp.pl?gene=HAVCR2   |
| FOSB     | FosB Proto-Oncogene, AP-1 Transcription Factor Subunit           | Protein coding | 41 | GC19P045467 | 1.889533997 | https://www.genecards.org/cgi-bin/carddisp.pl?gene=FOSB     |
| KRT20    | Keratin 20                                                       | Protein coding | 41 | GC17M040875 | 1.889533997 | https://www.genecards.org/cgi-bin/carddisp.pl?gene=KRT20    |
| DNMT3A   | DNA Methyltransferase 3 $\alpha$                                 | Protein coding | 51 | GC02M025228 | 1.889158845 | https://www.genecards.org/cgi-bin/carddisp.pl?gene=DNMT3A   |
| MIR27A   | MicroRNA 27a                                                     | RNA gene       | 23 | GC19M014149 | 1.888988495 | https://www.genecards.org/cgi-bin/carddisp.pl?gene=MIR27A   |
| IL21     | Interleukin 21                                                   | Protein coding | 42 | GC04M122612 | 1.886278152 | https://www.genecards.org/cgi-bin/carddisp.pl?gene=IL21     |
| ATP10A   | ATPase Phospholipid Transporting 10A (Putative)                  | Protein coding | 40 | GC15M025666 | 1.885004044 | https://www.genecards.org/cgi-bin/carddisp.pl?gene=ATP10A   |
| APOC2    | Apolipoprotein C2                                                | Protein coding | 44 | GC19P044945 | 1.880784273 | https://www.genecards.org/cgi-bin/carddisp.pl?gene=APOC2    |
| CFHR5    | Complement Factor H Related 5                                    | Protein coding | 40 | GC01P196977 | 1.880058408 | https://www.genecards.org/cgi-bin/carddisp.pl?gene=CFHR5    |
| MIR382   | MicroRNA 382                                                     | RNA gene       | 16 | GC14P106817 | 1.87736845  | https://www.genecards.org/cgi-bin/carddisp.pl?gene=MIR382   |
| RELA     | RELA Proto-Oncogene, NF-KB Subunit                               | Protein coding | 51 | GC11M065653 | 1.871609569 | https://www.genecards.org/cgi-bin/carddisp.pl?gene=RELA     |
| MIR100   | MicroRNA 100                                                     | RNA gene       | 21 | GC11M122152 | 1.869897127 | https://www.genecards.org/cgi-bin/carddisp.pl?gene=MIR100   |
| TNFRSF9  | TNF Receptor Superfamily Member 9                                | Protein coding | 44 | GC01M007915 | 1.86729598  | https://www.genecards.org/cgi-bin/carddisp.pl?gene=TNFRSF9  |
| MIR185   | MicroRNA 185                                                     | RNA gene       | 22 | GC22P020297 | 1.864518881 | https://www.genecards.org/cgi-bin/carddisp.pl?gene=MIR185   |
| MIR15A   | MicroRNA 15a                                                     | RNA gene       | 16 | GC13M050049 | 1.863605976 | https://www.genecards.org/cgi-bin/carddisp.pl?gene=MIR15A   |
| SLC1A7   | Solute Carrier Family 1 Member 7                                 | Protein coding | 43 | GC01M053087 | 1.860815287 | https://www.genecards.org/cgi-bin/carddisp.pl?gene=SLC1A7   |
| CCL7     | C-C Motif Chemokine Ligand 7                                     | Protein coding | 42 | GC17P034270 | 1.86079824  | https://www.genecards.org/cgi-bin/carddisp.pl?gene=CCL7     |
| SMN1     | Survival Of Motor Neuron 1, Telomeric                            | Protein coding | 42 | GC05P070924 | 1.859929442 | https://www.genecards.org/cgi-bin/carddisp.pl?gene=SMN1     |
| RB1      | RB Transcriptional Corepressor 1                                 | Protein coding | 48 | GC13P048303 | 1.857927561 | https://www.genecards.org/cgi-bin/carddisp.pl?gene=RB1      |
| MSX2     | Msh Homeobox 2                                                   | Protein coding | 48 | GC05P174724 | 1.857079744 | https://www.genecards.org/cgi-bin/carddisp.pl?gene=MSX2     |
| MIR495   | MicroRNA 495                                                     | RNA gene       | 16 | GC14P106827 | 1.855481386 | https://www.genecards.org/cgi-bin/carddisp.pl?gene=MIR495   |
| TAF1     | TATA-Box Binding Protein Associated Factor 1                     | Protein coding | 45 | GC0XP071366 | 1.853244424 | https://www.genecards.org/cgi-bin/carddisp.pl?gene=TAF1     |
| CAV3     | Caveolin 3                                                       | Protein coding | 43 | GC03P008733 | 1.844679236 | https://www.genecards.org/cgi-bin/carddisp.pl?gene=CAV3     |
| C11orf65 | Chromosome 11 Open Reading Frame 65                              | Protein coding | 30 | GC11M108308 | 1.843758583 | https://www.genecards.org/cgi-bin/carddisp.pl?gene=C11orf65 |
| CFI      | Complement Factor I                                              | Protein coding | 46 | GC04M109732 | 1.842537999 | https://www.genecards.org/cgi-bin/carddisp.pl?gene=CFI      |
| SLC12A2  | Solute Carrier Family 12 Member 2                                | Protein coding | 49 | GC05P128083 | 1.842051029 | https://www.genecards.org/cgi-bin/carddisp.pl?gene=SLC12A2  |
| TGM2     | Transglutaminase 2                                               | Protein coding | 47 | GC20M038127 | 1.839957714 | https://www.genecards.org/cgi-bin/carddisp.pl?gene=TGM2     |
| PARP12   | Poly(ADP-Ribose) Polymerase Family Member 12                     | Protein coding | 37 | GC07M140023 | 1.839692831 | https://www.genecards.org/cgi-bin/carddisp.pl?gene=PARP12   |
| GPATCH8  | G-Patch Domain Containing 8                                      | Protein coding | 35 | GC17M044395 | 1.839692831 | https://www.genecards.org/cgi-bin/carddisp.pl?gene=GPATCH8  |
| TMCO6    | Transmembrane And Coiled-Coil Domains 6                          | Protein coding | 32 | GC05P144333 | 1.839692831 | https://www.genecards.org/cgi-bin/carddisp.pl?gene=TMCO6    |
| CA2      | Carbonic Anhydrase 2                                             | Protein coding | 51 | GC08P085463 | 1.839463234 | https://www.genecards.org/cgi-bin/carddisp.pl?gene=CA2      |
| RAMP1    | Receptor Activity Modifying Protein 1                            | Protein coding | 43 | GC02P237858 | 1.838195562 | https://www.genecards.org/cgi-bin/carddisp.pl?gene=RAMP1    |
| BLOC1S1  | Biogenesis Of Lysosomal Organelles Complex 1 Subunit 1           | Protein coding | 36 | GC12P055775 | 1.838136673 | https://www.genecards.org/cgi-bin/carddisp.pl?gene=BLOC1S1  |
| GAD2     | Glutamate Decarboxylase 2                                        | Protein coding | 46 | GC10P026216 | 1.838021874 | https://www.genecards.org/cgi-bin/carddisp.pl?gene=GAD2     |
| NLGN1    | Neuroigin 1                                                      | Protein coding | 45 | GC03P173396 | 1.837685943 | https://www.genecards.org/cgi-bin/carddisp.pl?gene=NLGN1    |
| CRYAA    | Crystallin $\alpha$ A                                            | Protein coding | 44 | GC21P043169 | 1.834293485 | https://www.genecards.org/cgi-bin/carddisp.pl?gene=CRYAA    |
| CARTPT   | CART Prepropeptide                                               | Protein coding | 44 | GC05P071719 | 1.832998037 | https://www.genecards.org/cgi-bin/carddisp.pl?gene=CARTPT   |
| LAMP1    | Lysosomal Associated Membrane Protein 1                          | Protein coding | 42 | GC13P113297 | 1.831367731 | https://www.genecards.org/cgi-bin/carddisp.pl?gene=LAMP1    |
| GNMT     | Glycine N-Methyltransferase                                      | Protein coding | 45 | GC06P042960 | 1.829119563 | https://www.genecards.org/cgi-bin/carddisp.pl?gene=GNMT     |
| BRCA1    | BRCA1 DNA Repair Associated                                      | Protein coding | 50 | GC17M043044 | 1.826038241 | https://www.genecards.org/cgi-bin/carddisp.pl?gene=BRCA1    |
| TRPC6    | Transient Receptor Potential Cation Channel Subfamily C Member 6 | Protein coding | 48 | GC11M101451 | 1.825274587 | https://www.genecards.org/cgi-bin/carddisp.pl?gene=TRPC6    |
| NTNG1    | Netrin G1                                                        | Protein coding | 41 | GC01P107140 | 1.823109508 | https://www.genecards.org/cgi-bin/carddisp.pl?gene=NTNG1    |
| ITPK1    | Inositol-Tetrakisphosphate 1-Kinase                              | Protein coding | 41 | GC14M092936 | 1.820833921 | https://www.genecards.org/cgi-bin/carddisp.pl?gene=ITPK1    |
| SLC20A2  | Solute Carrier Family 20 Member 2                                | Protein coding | 46 | GC08M042416 | 1.819397926 | https://www.genecards.org/cgi-bin/carddisp.pl?gene=SLC20A2  |
| SOCs2    | Suppressor Of Cytokine Signaling 2                               | Protein coding | 44 | GC12P093569 | 1.819397926 | https://www.genecards.org/cgi-bin/carddisp.pl?gene=SOCs2    |
| TRPC3    | Transient Receptor Potential Cation Channel Subfamily C Member 3 | Protein coding | 48 | GC04M121879 | 1.817133665 | https://www.genecards.org/cgi-bin/carddisp.pl?gene=TRPC3    |
| CYP2B6   | Cytochrome P450 Family 2 Subfamily B Member 6                    | Protein coding | 47 | GC19P040991 | 1.816233993 | https://www.genecards.org/cgi-bin/carddisp.pl?gene=CYP2B6   |
| MIR16-1  | MicroRNA 16-1                                                    | RNA gene       | 22 | GC13M050048 | 1.81433177  | https://www.genecards.org/cgi-bin/carddisp.pl?gene=MIR16-1  |
| GP5      | Glycoprotein V Platelet                                          | Protein coding | 40 | GC03M194395 | 1.81335485  | https://www.genecards.org/cgi-bin/carddisp.pl?gene=GP5      |
| AFF2     | AF4/FMR2 Family Member 2                                         | Protein coding | 41 | GC0XP148500 | 1.813255429 | https://www.genecards.org/cgi-bin/carddisp.pl?gene=AFF2     |
| HSP90AA1 | Heat Shock Protein 90 $\alpha$ Family Class A Member 1           | Protein coding | 47 | GC14M102080 | 1.811911106 | https://www.genecards.org/cgi-bin/carddisp.pl?gene=HSP90AA1 |
| GAST     | Gastrin                                                          | Protein coding | 40 | GC17P041712 | 1.809186697 | https://www.genecards.org/cgi-bin/carddisp.pl?gene=GAST     |
| TCF4     | Transcription Factor 4                                           | Protein coding | 46 | GC18M055222 | 1.808351755 | https://www.genecards.org/cgi-bin/carddisp.pl?gene=TCF4     |
| NDUFA6   | NADH:Ubiquinone Oxidoreductase Subunit A6                        | Protein coding | 45 | GC22M042085 | 1.806030154 | https://www.genecards.org/cgi-bin/carddisp.pl?gene=NDUFA6   |
| MIR200B  | MicroRNA 200b                                                    | RNA gene       | 21 | GC01P001167 | 1.805338502 | https://www.genecards.org/cgi-bin/carddisp.pl?gene=MIR200B  |
| ITGA5    | Integrin Subunit $\alpha$ 5                                      | Protein coding | 48 | GC12M054469 | 1.804501653 | https://www.genecards.org/cgi-bin/carddisp.pl?gene=ITGA5    |
| ADORA2B  | Adenosine A2b Receptor                                           | Protein coding | 47 | GC17P015927 | 1.8009758   | https://www.genecards.org/cgi-bin/carddisp.pl?gene=ADORA2B  |
| IL23R    | Interleukin 23 Receptor                                          | Protein coding | 44 | GC01P067138 | 1.800207496 | https://www.genecards.org/cgi-bin/carddisp.pl?gene=IL23R    |
| NEDD4    | NEDD4 E3 Ubiquitin Protein Ligase                                | Protein coding | 47 | GC15M055826 | 1.798918962 | https://www.genecards.org/cgi-bin/carddisp.pl?gene=NEDD4    |
| TNR      | Tenascin R                                                       | Protein coding | 42 | GC01M175291 | 1.792670727 | https://www.genecards.org/cgi-bin/carddisp.pl?gene=TNR      |
| DFFB     | DNA Fragmentation Factor Subunit $\beta$                         | Protein coding | 43 | GC01P003797 | 1.790557742 | https://www.genecards.org/cgi-bin/carddisp.pl?gene=DFFB     |
| BACE2    | $\beta$ -Secretase 2                                             | Protein coding | 39 | GC21P041168 | 1.786271095 | https://www.genecards.org/cgi-bin/carddisp.pl?gene=BACE2    |
| GLUL     | Glutamate-Ammonia Ligase                                         | Protein coding | 48 | GC01M182378 | 1.784514904 | https://www.genecards.org/cgi-bin/carddisp.pl?gene=GLUL     |
| RBFOX1   | RNA Binding Fox-1 Homolog 1                                      | Protein coding | 38 | GC16P006296 | 1.784430861 | https://www.genecards.org/cgi-bin/carddisp.pl?gene=RBFOX1   |
| PRKCB    | Protein Kinase C $\beta$                                         | Protein coding | 48 | GC16P023993 | 1.783356667 | https://www.genecards.org/cgi-bin/carddisp.pl?gene=PRKCB    |
| RMST     | Rhabdomyosarcoma 2 Associated Transcript                         | RNA gene       | 21 | GC12P097431 | 1.78272295  | https://www.genecards.org/cgi-bin/carddisp.pl?gene=RMST     |

|              |                                                                                 |                   |    |             |             |                                                                                                                                               |
|--------------|---------------------------------------------------------------------------------|-------------------|----|-------------|-------------|-----------------------------------------------------------------------------------------------------------------------------------------------|
| HPR          | Haptoglobin-Related Protein                                                     | Protein coding    | 40 | GC16P072097 | 1.780373335 | <a href="https://www.genecards.org/cgi-bin/carddisp.pl?gene=HPR">https://www.genecards.org/cgi-bin/carddisp.pl?gene=HPR</a>                   |
| UCN          | Urocortin                                                                       | Protein coding    | 38 | GC02M027308 | 1.780233145 | <a href="https://www.genecards.org/cgi-bin/carddisp.pl?gene=UCN">https://www.genecards.org/cgi-bin/carddisp.pl?gene=UCN</a>                   |
| CAMK2A       | Calcium/Calmodulin Dependent Protein Kinase II $\alpha$                         | Protein coding    | 50 | GC05M150219 | 1.77940166  | <a href="https://www.genecards.org/cgi-bin/carddisp.pl?gene=CAMK2A">https://www.genecards.org/cgi-bin/carddisp.pl?gene=CAMK2A</a>             |
| MIR326       | MicroRNA 326                                                                    | RNA gene          | 21 | GC11M075335 | 1.77940166  | <a href="https://www.genecards.org/cgi-bin/carddisp.pl?gene=MIR326">https://www.genecards.org/cgi-bin/carddisp.pl?gene=MIR326</a>             |
| TPO          | Thyroid Peroxidase                                                              | Protein coding    | 48 | GC02P001374 | 1.77765429  | <a href="https://www.genecards.org/cgi-bin/carddisp.pl?gene=TPO">https://www.genecards.org/cgi-bin/carddisp.pl?gene=TPO</a>                   |
| HTR2B        | 5-Hydroxytryptamine Receptor 2B                                                 | Protein coding    | 43 | GC02M231108 | 1.777495623 | <a href="https://www.genecards.org/cgi-bin/carddisp.pl?gene=HTR2B">https://www.genecards.org/cgi-bin/carddisp.pl?gene=HTR2B</a>               |
| CA4          | Carbonic Anhydrase 4                                                            | Protein coding    | 46 | GC17P060149 | 1.77739954  | <a href="https://www.genecards.org/cgi-bin/carddisp.pl?gene=CA4">https://www.genecards.org/cgi-bin/carddisp.pl?gene=CA4</a>                   |
| NLRP1        | NLR Family Pyrin Domain Containing 1                                            | Protein coding    | 44 | GC17M005499 | 1.77739954  | <a href="https://www.genecards.org/cgi-bin/carddisp.pl?gene=NLRP1">https://www.genecards.org/cgi-bin/carddisp.pl?gene=NLRP1</a>               |
| PGM1         | Phosphoglucomutase 1                                                            | Protein coding    | 48 | GC01P063593 | 1.776956916 | <a href="https://www.genecards.org/cgi-bin/carddisp.pl?gene=PGM1">https://www.genecards.org/cgi-bin/carddisp.pl?gene=PGM1</a>                 |
| PCNA         | Proliferating Cell Nuclear Antigen                                              | Protein coding    | 51 | GC20M005114 | 1.775626779 | <a href="https://www.genecards.org/cgi-bin/carddisp.pl?gene=PCNA">https://www.genecards.org/cgi-bin/carddisp.pl?gene=PCNA</a>                 |
| HBG2         | Hemoglobin Subunit $\gamma$ 2                                                   | Protein coding    | 41 | GC11M005469 | 1.771106243 | <a href="https://www.genecards.org/cgi-bin/carddisp.pl?gene=HBG2">https://www.genecards.org/cgi-bin/carddisp.pl?gene=HBG2</a>                 |
| PLIN1        | Perilipin 1                                                                     | Protein coding    | 45 | GC15M089664 | 1.769032001 | <a href="https://www.genecards.org/cgi-bin/carddisp.pl?gene=PLIN1">https://www.genecards.org/cgi-bin/carddisp.pl?gene=PLIN1</a>               |
| ULK4         | Unc-51 Like Kinase 4                                                            | Protein coding    | 41 | GC03M041247 | 1.766843081 | <a href="https://www.genecards.org/cgi-bin/carddisp.pl?gene=ULK4">https://www.genecards.org/cgi-bin/carddisp.pl?gene=ULK4</a>                 |
| UTS2         | Urotensin 2                                                                     | Protein coding    | 41 | GC01M007843 | 1.766714811 | <a href="https://www.genecards.org/cgi-bin/carddisp.pl?gene=UTS2">https://www.genecards.org/cgi-bin/carddisp.pl?gene=UTS2</a>                 |
| CYP1A2       | Cytochrome P450 Family 1 Subfamily A Member 2                                   | Protein coding    | 45 | GC15P074748 | 1.764437199 | <a href="https://www.genecards.org/cgi-bin/carddisp.pl?gene=CYP1A2">https://www.genecards.org/cgi-bin/carddisp.pl?gene=CYP1A2</a>             |
| DPAGT1       | Dolichyl-Phosphate N-Acetylglucosaminophosphotransferase 1                      | Protein coding    | 45 | GC11M119096 | 1.763484716 | <a href="https://www.genecards.org/cgi-bin/carddisp.pl?gene=DPAGT1">https://www.genecards.org/cgi-bin/carddisp.pl?gene=DPAGT1</a>             |
| GSK3B        | Glycogen Synthase Kinase 3 $\beta$                                              | Protein coding    | 50 | GC03M119821 | 1.763318062 | <a href="https://www.genecards.org/cgi-bin/carddisp.pl?gene=GSK3B">https://www.genecards.org/cgi-bin/carddisp.pl?gene=GSK3B</a>               |
| MIR29B1      | MicroRNA 29b-1                                                                  | RNA gene          | 21 | GC07M130877 | 1.763009667 | <a href="https://www.genecards.org/cgi-bin/carddisp.pl?gene=MIR29B1">https://www.genecards.org/cgi-bin/carddisp.pl?gene=MIR29B1</a>           |
| CUBN         | Cubilin                                                                         | Protein coding    | 46 | GC10M016824 | 1.762341022 | <a href="https://www.genecards.org/cgi-bin/carddisp.pl?gene=CUBN">https://www.genecards.org/cgi-bin/carddisp.pl?gene=CUBN</a>                 |
| FUT2         | Fucosyltransferase 2                                                            | Protein coding    | 45 | GC19P048695 | 1.762341022 | <a href="https://www.genecards.org/cgi-bin/carddisp.pl?gene=FUT2">https://www.genecards.org/cgi-bin/carddisp.pl?gene=FUT2</a>                 |
| TCN1         | Transcobalamin 1                                                                | Protein coding    | 41 | GC11M071378 | 1.762341022 | <a href="https://www.genecards.org/cgi-bin/carddisp.pl?gene=TCN1">https://www.genecards.org/cgi-bin/carddisp.pl?gene=TCN1</a>                 |
| NBPF3        | NBPF Member 3                                                                   | Protein coding    | 34 | GC01P021578 | 1.762341022 | <a href="https://www.genecards.org/cgi-bin/carddisp.pl?gene=NBPF3">https://www.genecards.org/cgi-bin/carddisp.pl?gene=NBPF3</a>               |
| HMGCL        | 3-Hydroxy-3-Methylglutaryl-CoA Lyase                                            | Protein coding    | 46 | GC01M023801 | 1.761392236 | <a href="https://www.genecards.org/cgi-bin/carddisp.pl?gene=HMGCL">https://www.genecards.org/cgi-bin/carddisp.pl?gene=HMGCL</a>               |
| CARF         | Calcium Responsive Transcription Factor                                         | Protein coding    | 33 | GC02P202912 | 1.760220766 | <a href="https://www.genecards.org/cgi-bin/carddisp.pl?gene=CARF">https://www.genecards.org/cgi-bin/carddisp.pl?gene=CARF</a>                 |
| SEMA3F       | Semaphorin 3F                                                                   | Protein coding    | 41 | GC03P050167 | 1.751241088 | <a href="https://www.genecards.org/cgi-bin/carddisp.pl?gene=SEMA3F">https://www.genecards.org/cgi-bin/carddisp.pl?gene=SEMA3F</a>             |
| BMP4         | Bone Morphogenetic Protein 4                                                    | Protein coding    | 48 | GC14M053949 | 1.750394583 | <a href="https://www.genecards.org/cgi-bin/carddisp.pl?gene=BMP4">https://www.genecards.org/cgi-bin/carddisp.pl?gene=BMP4</a>                 |
| GP9          | Glycoprotein IX Platelet                                                        | Protein coding    | 46 | GC03P131763 | 1.749897242 | <a href="https://www.genecards.org/cgi-bin/carddisp.pl?gene=GP9">https://www.genecards.org/cgi-bin/carddisp.pl?gene=GP9</a>                   |
| ENPP3        | Ectonucleotide Pyrophosphatase/Phosphodiesterase 3                              | Protein coding    | 43 | GC06P131617 | 1.749147058 | <a href="https://www.genecards.org/cgi-bin/carddisp.pl?gene=ENPP3">https://www.genecards.org/cgi-bin/carddisp.pl?gene=ENPP3</a>               |
| PTCH1        | Patched 1                                                                       | Protein coding    | 50 | GC09M095442 | 1.748305321 | <a href="https://www.genecards.org/cgi-bin/carddisp.pl?gene=PTCH1">https://www.genecards.org/cgi-bin/carddisp.pl?gene=PTCH1</a>               |
| PRKAR1A      | Protein Kinase CAMP-Dependent Type I Regulatory Subunit $\alpha$                | Protein coding    | 51 | GC17P068612 | 1.747653365 | <a href="https://www.genecards.org/cgi-bin/carddisp.pl?gene=PRKAR1A">https://www.genecards.org/cgi-bin/carddisp.pl?gene=PRKAR1A</a>           |
| LTB4R2       | Leukotriene B4 Receptor 2                                                       | Protein coding    | 43 | GC14P026884 | 1.747585297 | <a href="https://www.genecards.org/cgi-bin/carddisp.pl?gene=LTB4R2">https://www.genecards.org/cgi-bin/carddisp.pl?gene=LTB4R2</a>             |
| TRADD        | TNFRSF1A Associated Via Death Domain                                            | Protein coding    | 43 | GC16M067154 | 1.747421265 | <a href="https://www.genecards.org/cgi-bin/carddisp.pl?gene=TRADD">https://www.genecards.org/cgi-bin/carddisp.pl?gene=TRADD</a>               |
| CASP7        | Caspase 7                                                                       | Protein coding    | 50 | GC10P113679 | 1.743015051 | <a href="https://www.genecards.org/cgi-bin/carddisp.pl?gene=CASP7">https://www.genecards.org/cgi-bin/carddisp.pl?gene=CASP7</a>               |
| WARS1        | Tryptophanyl-TRNA Synthetase 1                                                  | Protein coding    | 37 | GC14M100334 | 1.741673231 | <a href="https://www.genecards.org/cgi-bin/carddisp.pl?gene=WARS1">https://www.genecards.org/cgi-bin/carddisp.pl?gene=WARS1</a>               |
| ATP2B1       | ATPase Plasma Membrane Ca2+ Transporting 1                                      | Protein coding    | 45 | GC12M089588 | 1.740813375 | <a href="https://www.genecards.org/cgi-bin/carddisp.pl?gene=ATP2B1">https://www.genecards.org/cgi-bin/carddisp.pl?gene=ATP2B1</a>             |
| CYSLTR2      | Cysteinyl Leukotriene Receptor 2                                                | Protein coding    | 47 | GC13P048653 | 1.740555406 | <a href="https://www.genecards.org/cgi-bin/carddisp.pl?gene=CYSLTR2">https://www.genecards.org/cgi-bin/carddisp.pl?gene=CYSLTR2</a>           |
| KRT18        | Keratin 18                                                                      | Protein coding    | 48 | GC12P052948 | 1.738007426 | <a href="https://www.genecards.org/cgi-bin/carddisp.pl?gene=KRT18">https://www.genecards.org/cgi-bin/carddisp.pl?gene=KRT18</a>               |
| LOC110973015 | NOS3 5' Regulatory Region                                                       | Biological region | 2  | GC07P150988 | 1.738007426 | <a href="https://www.genecards.org/cgi-bin/carddisp.pl?gene=LOC110973015">https://www.genecards.org/cgi-bin/carddisp.pl?gene=LOC110973015</a> |
| ASXL1        | ASXL Transcriptional Regulator 1                                                | Protein coding    | 43 | GC20P032390 | 1.730462909 | <a href="https://www.genecards.org/cgi-bin/carddisp.pl?gene=ASXL1">https://www.genecards.org/cgi-bin/carddisp.pl?gene=ASXL1</a>               |
| NFE2         | Nuclear Factor, Erythroid 2                                                     | Protein coding    | 41 | GC12M054292 | 1.730462909 | <a href="https://www.genecards.org/cgi-bin/carddisp.pl?gene=NFE2">https://www.genecards.org/cgi-bin/carddisp.pl?gene=NFE2</a>                 |
| CRLF3        | Cytokine Receptor Like Factor 3                                                 | Protein coding    | 37 | GC17M030769 | 1.727529526 | <a href="https://www.genecards.org/cgi-bin/carddisp.pl?gene=CRLF3">https://www.genecards.org/cgi-bin/carddisp.pl?gene=CRLF3</a>               |
| DIO3         | Iodothyronine Deiodinase 3                                                      | Protein coding    | 41 | GC14P106592 | 1.727017283 | <a href="https://www.genecards.org/cgi-bin/carddisp.pl?gene=DIO3">https://www.genecards.org/cgi-bin/carddisp.pl?gene=DIO3</a>                 |
| TNFSF14      | TNF Superfamily Member 14                                                       | Protein coding    | 41 | GC19M006663 | 1.725046635 | <a href="https://www.genecards.org/cgi-bin/carddisp.pl?gene=TNFSF14">https://www.genecards.org/cgi-bin/carddisp.pl?gene=TNFSF14</a>           |
| PRRC2A       | Proline Rich Coiled-Coil 2A                                                     | Protein coding    | 32 | GC06P058310 | 1.724992275 | <a href="https://www.genecards.org/cgi-bin/carddisp.pl?gene=PRRC2A">https://www.genecards.org/cgi-bin/carddisp.pl?gene=PRRC2A</a>             |
| STUB1        | STIP1 Homology And U-Box Containing Protein 1                                   | Protein coding    | 45 | GC16P006127 | 1.723853707 | <a href="https://www.genecards.org/cgi-bin/carddisp.pl?gene=STUB1">https://www.genecards.org/cgi-bin/carddisp.pl?gene=STUB1</a>               |
| CANT1        | Calcium Activated Nucleotidase 1                                                | Protein coding    | 44 | GC17M078992 | 1.718307853 | <a href="https://www.genecards.org/cgi-bin/carddisp.pl?gene=CANT1">https://www.genecards.org/cgi-bin/carddisp.pl?gene=CANT1</a>               |
| LTBP2        | Latent Transforming Growth Factor $\beta$ Binding Protein 2                     | Protein coding    | 44 | GC14M074498 | 1.716773629 | <a href="https://www.genecards.org/cgi-bin/carddisp.pl?gene=LTBP2">https://www.genecards.org/cgi-bin/carddisp.pl?gene=LTBP2</a>               |
| WNK4         | WNK Lysine Deficient Protein Kinase 4                                           | Protein coding    | 44 | GC17P044928 | 1.715196848 | <a href="https://www.genecards.org/cgi-bin/carddisp.pl?gene=WNK4">https://www.genecards.org/cgi-bin/carddisp.pl?gene=WNK4</a>                 |
| RNASE3       | Ribonuclease A Family Member 3                                                  | Protein coding    | 41 | GC14P020891 | 1.710405469 | <a href="https://www.genecards.org/cgi-bin/carddisp.pl?gene=RNASE3">https://www.genecards.org/cgi-bin/carddisp.pl?gene=RNASE3</a>             |
| NNMT         | Nicotinamide N-Methyltransferase                                                | Protein coding    | 45 | GC11P114257 | 1.708176255 | <a href="https://www.genecards.org/cgi-bin/carddisp.pl?gene=NNMT">https://www.genecards.org/cgi-bin/carddisp.pl?gene=NNMT</a>                 |
| CDC42        | Cell Division Cycle 42                                                          | Protein coding    | 51 | GC01P022134 | 1.706145525 | <a href="https://www.genecards.org/cgi-bin/carddisp.pl?gene=CDC42">https://www.genecards.org/cgi-bin/carddisp.pl?gene=CDC42</a>               |
| IL21R        | Interleukin 21 Receptor                                                         | Protein coding    | 41 | GC16P027413 | 1.703454852 | <a href="https://www.genecards.org/cgi-bin/carddisp.pl?gene=IL21R">https://www.genecards.org/cgi-bin/carddisp.pl?gene=IL21R</a>               |
| HJV          | Hemojuvelin BMP Co-Receptor                                                     | Protein coding    | 36 | GC01M146018 | 1.70320034  | <a href="https://www.genecards.org/cgi-bin/carddisp.pl?gene=HJV">https://www.genecards.org/cgi-bin/carddisp.pl?gene=HJV</a>                   |
| OPRK1        | Opioid Receptor $\kappa$ 1                                                      | Protein coding    | 45 | GC08M053227 | 1.701605558 | <a href="https://www.genecards.org/cgi-bin/carddisp.pl?gene=OPRK1">https://www.genecards.org/cgi-bin/carddisp.pl?gene=OPRK1</a>               |
| MIR27B       | MicroRNA 27b                                                                    | RNA gene          | 21 | GC09P095097 | 1.699447632 | <a href="https://www.genecards.org/cgi-bin/carddisp.pl?gene=MIR27B">https://www.genecards.org/cgi-bin/carddisp.pl?gene=MIR27B</a>             |
| MARS1        | Methionyl-TRNA Synthetase 1                                                     | Protein coding    | 36 | GC12P057476 | 1.69891727  | <a href="https://www.genecards.org/cgi-bin/carddisp.pl?gene=MARS1">https://www.genecards.org/cgi-bin/carddisp.pl?gene=MARS1</a>               |
| ADIPOR1      | Adiponectin Receptor 1                                                          | Protein coding    | 45 | GC01M202940 | 1.697815299 | <a href="https://www.genecards.org/cgi-bin/carddisp.pl?gene=ADIPOR1">https://www.genecards.org/cgi-bin/carddisp.pl?gene=ADIPOR1</a>           |
| FES          | FES Proto-Oncogene, Tyrosine Kinase                                             | Protein coding    | 48 | GC15P090883 | 1.697409511 | <a href="https://www.genecards.org/cgi-bin/carddisp.pl?gene=FES">https://www.genecards.org/cgi-bin/carddisp.pl?gene=FES</a>                   |
| PDE4DIP      | Phosphodiesterase 4D Interacting Protein                                        | Protein coding    | 40 | GC01P148808 | 1.69645834  | <a href="https://www.genecards.org/cgi-bin/carddisp.pl?gene=PDE4DIP">https://www.genecards.org/cgi-bin/carddisp.pl?gene=PDE4DIP</a>           |
| ACOT4        | Acyl-CoA Thioesterase 4                                                         | Protein coding    | 36 | GC14P073592 | 1.69645834  | <a href="https://www.genecards.org/cgi-bin/carddisp.pl?gene=ACOT4">https://www.genecards.org/cgi-bin/carddisp.pl?gene=ACOT4</a>               |
| TRIM29       | Tripartite Motif Containing 29                                                  | Protein coding    | 40 | GC11M120111 | 1.695588708 | <a href="https://www.genecards.org/cgi-bin/carddisp.pl?gene=TRIM29">https://www.genecards.org/cgi-bin/carddisp.pl?gene=TRIM29</a>             |
| TPPP3        | Tubulin Polymerization Promoting Protein Family Member 3                        | Protein coding    | 37 | GC16M067389 | 1.695583344 | <a href="https://www.genecards.org/cgi-bin/carddisp.pl?gene=TPPP3">https://www.genecards.org/cgi-bin/carddisp.pl?gene=TPPP3</a>               |
| CDK5R1       | Cyclin Dependent Kinase 5 Regulatory Subunit 1                                  | Protein coding    | 45 | GC17P032486 | 1.694307089 | <a href="https://www.genecards.org/cgi-bin/carddisp.pl?gene=CDK5R1">https://www.genecards.org/cgi-bin/carddisp.pl?gene=CDK5R1</a>             |
| PROM1        | Prominin 1                                                                      | Protein coding    | 44 | GC04M015965 | 1.691454291 | <a href="https://www.genecards.org/cgi-bin/carddisp.pl?gene=PROM1">https://www.genecards.org/cgi-bin/carddisp.pl?gene=PROM1</a>               |
| PLA2G1B      | Phospholipase A2 Group IB                                                       | Protein coding    | 45 | GC12M120322 | 1.690787792 | <a href="https://www.genecards.org/cgi-bin/carddisp.pl?gene=PLA2G1B">https://www.genecards.org/cgi-bin/carddisp.pl?gene=PLA2G1B</a>           |
| BTB          | Biotinidase                                                                     | Protein coding    | 44 | GC03P016090 | 1.690451622 | <a href="https://www.genecards.org/cgi-bin/carddisp.pl?gene=BTB">https://www.genecards.org/cgi-bin/carddisp.pl?gene=BTB</a>                   |
| GAD1         | Glutamate Decarboxylase 1                                                       | Protein coding    | 51 | GC02P170813 | 1.689604044 | <a href="https://www.genecards.org/cgi-bin/carddisp.pl?gene=GAD1">https://www.genecards.org/cgi-bin/carddisp.pl?gene=GAD1</a>                 |
| CASR         | Calcium Sensing Receptor                                                        | Protein coding    | 50 | GC03P122183 | 1.688817024 | <a href="https://www.genecards.org/cgi-bin/carddisp.pl?gene=CASR">https://www.genecards.org/cgi-bin/carddisp.pl?gene=CASR</a>                 |
| YWHAQ        | Tyrosine 3-Monooxygenase/Tryptophan 5-Monooxygenase Activation Protein $\theta$ | Protein coding    | 47 | GC02M009583 | 1.687107563 | <a href="https://www.genecards.org/cgi-bin/carddisp.pl?gene=YWHAQ">https://www.genecards.org/cgi-bin/carddisp.pl?gene=YWHAQ</a>               |
| CHD3         | Chromodomain Helicase DNA Binding Protein 3                                     | Protein coding    | 42 | GC17P009353 | 1.685418725 | <a href="https://www.genecards.org/cgi-bin/carddisp.pl?gene=CHD3">https://www.genecards.org/cgi-bin/carddisp.pl?gene=CHD3</a>                 |
| NEUROG3      | Neurogenin 3                                                                    | Protein coding    | 41 | GC10M069571 | 1.685418725 | <a href="https://www.genecards.org/cgi-bin/carddisp.pl?gene=NEUROG3">https://www.genecards.org/cgi-bin/carddisp.pl?gene=NEUROG3</a>           |
| DPH1         | Diphthamide Biosynthesis 1                                                      | Protein coding    | 40 | GC17P002030 | 1.685418725 | <a href="https://www.genecards.org/cgi-bin/carddisp.pl?gene=DPH1">https://www.genecards.org/cgi-bin/carddisp.pl?gene=DPH1</a>                 |
| CES1         | Carboxylesterase 1                                                              | Protein coding    | 46 | GC16M055836 | 1.682517886 | <a href="https://www.genecards.org/cgi-bin/carddisp.pl?gene=CES1">https://www.genecards.org/cgi-bin/carddisp.pl?gene=CES1</a>                 |
| FGF1         | Fibroblast Growth Factor 1                                                      | Protein coding    | 47 | GC05M142555 | 1.67816329  | <a href="https://www.genecards.org/cgi-bin/carddisp.pl?gene=FGF1">https://www.genecards.org/cgi-bin/carddisp.pl?gene=FGF1</a>                 |
| KLF5         | Kruppel Like Factor 5                                                           | Protein coding    | 45 | GC13P073054 | 1.676096797 | <a href="https://www.genecards.org/cgi-bin/carddisp.pl?gene=KLF5">https://www.genecards.org/cgi-bin/carddisp.pl?gene=KLF5</a>                 |
| SLC22A7      | Solute Carrier Family 22 Member 7                                               | Protein coding    | 42 | GC06P058517 | 1.675104856 | <a href="https://www.genecards.org/cgi-bin/carddisp.pl?gene=SLC22A7">https://www.genecards.org/cgi-bin/carddisp.pl?gene=SLC22A7</a>           |

|           |                                                            |                |    |             |             |                                                                                                                                         |
|-----------|------------------------------------------------------------|----------------|----|-------------|-------------|-----------------------------------------------------------------------------------------------------------------------------------------|
| EIF1AY    | Eukaryotic Translation Initiation Factor 1A Y-Linked       | Protein coding | 34 | GC0YP020576 | 1.675033092 | <a href="https://www.genecards.org/cgi-bin/carddisp.pl?gene=EIF1AY">https://www.genecards.org/cgi-bin/carddisp.pl?gene=EIF1AY</a>       |
| IL18R1    | Interleukin 18 Receptor 1                                  | Protein coding | 42 | GC02P102311 | 1.67274487  | <a href="https://www.genecards.org/cgi-bin/carddisp.pl?gene=IL18R1">https://www.genecards.org/cgi-bin/carddisp.pl?gene=IL18R1</a>       |
| SEMA4A    | Semaphorin 4A                                              | Protein coding | 45 | GC01P156147 | 1.672510147 | <a href="https://www.genecards.org/cgi-bin/carddisp.pl?gene=SEMA4A">https://www.genecards.org/cgi-bin/carddisp.pl?gene=SEMA4A</a>       |
| KLRC4     | Killer Cell Lectin Like Receptor C4                        | Protein coding | 38 | GC12M016313 | 1.671394587 | <a href="https://www.genecards.org/cgi-bin/carddisp.pl?gene=KLRC4">https://www.genecards.org/cgi-bin/carddisp.pl?gene=KLRC4</a>         |
| UBAC2     | UBA Domain Containing 2                                    | Protein coding | 37 | GC13P099200 | 1.671394587 | <a href="https://www.genecards.org/cgi-bin/carddisp.pl?gene=UBAC2">https://www.genecards.org/cgi-bin/carddisp.pl?gene=UBAC2</a>         |
| IL12A-AS1 | IL12A Antisense RNA 1                                      | RNA gene       | 15 | GC03M159913 | 1.671394587 | <a href="https://www.genecards.org/cgi-bin/carddisp.pl?gene=IL12A-AS1">https://www.genecards.org/cgi-bin/carddisp.pl?gene=IL12A-AS1</a> |
| CTH       | Cystathionine $\gamma$ -Lyase                              | Protein coding | 50 | GC01P070411 | 1.670645475 | <a href="https://www.genecards.org/cgi-bin/carddisp.pl?gene=CTH">https://www.genecards.org/cgi-bin/carddisp.pl?gene=CTH</a>             |
| TRIM9     | Tripartite Motif Containing 9                              | Protein coding | 40 | GC14M050975 | 1.670497656 | <a href="https://www.genecards.org/cgi-bin/carddisp.pl?gene=TRIM9">https://www.genecards.org/cgi-bin/carddisp.pl?gene=TRIM9</a>         |
| AP4M1     | Adaptor Related Protein Complex 4 Subunit $\mu$ 1          | Protein coding | 39 | GC07P100101 | 1.670456052 | <a href="https://www.genecards.org/cgi-bin/carddisp.pl?gene=AP4M1">https://www.genecards.org/cgi-bin/carddisp.pl?gene=AP4M1</a>         |
| ENO1      | Enolase 1                                                  | Protein coding | 47 | GC01M008861 | 1.669564724 | <a href="https://www.genecards.org/cgi-bin/carddisp.pl?gene=ENO1">https://www.genecards.org/cgi-bin/carddisp.pl?gene=ENO1</a>           |
| BDKRB1    | Bradykinin Receptor B1                                     | Protein coding | 43 | GC14P096275 | 1.668141842 | <a href="https://www.genecards.org/cgi-bin/carddisp.pl?gene=BDKRB1">https://www.genecards.org/cgi-bin/carddisp.pl?gene=BDKRB1</a>       |
| AGXT2     | Alanine--Glyoxylate Aminotransferase 2                     | Protein coding | 41 | GC05M034998 | 1.667787313 | <a href="https://www.genecards.org/cgi-bin/carddisp.pl?gene=AGXT2">https://www.genecards.org/cgi-bin/carddisp.pl?gene=AGXT2</a>         |
| ERN1      | Endoplasmic Reticulum To Nucleus Signaling 1               | Protein coding | 45 | GC17M064039 | 1.667581201 | <a href="https://www.genecards.org/cgi-bin/carddisp.pl?gene=ERN1">https://www.genecards.org/cgi-bin/carddisp.pl?gene=ERN1</a>           |
| TGFA      | Transforming Growth Factor $\alpha$                        | Protein coding | 45 | GC02M070447 | 1.667345166 | <a href="https://www.genecards.org/cgi-bin/carddisp.pl?gene=TGFA">https://www.genecards.org/cgi-bin/carddisp.pl?gene=TGFA</a>           |
| NTN4      | Netrin 4                                                   | Protein coding | 39 | GC12M095657 | 1.66633749  | <a href="https://www.genecards.org/cgi-bin/carddisp.pl?gene=NTN4">https://www.genecards.org/cgi-bin/carddisp.pl?gene=NTN4</a>           |
| RAPGEF3   | Rap Guanine Nucleotide Exchange Factor 3                   | Protein coding | 45 | GC12M047736 | 1.666141272 | <a href="https://www.genecards.org/cgi-bin/carddisp.pl?gene=RAPGEF3">https://www.genecards.org/cgi-bin/carddisp.pl?gene=RAPGEF3</a>     |
| SCN10A    | Sodium Voltage-Gated Channel $\alpha$ Subunit 10           | Protein coding | 47 | GC03M038713 | 1.664826155 | <a href="https://www.genecards.org/cgi-bin/carddisp.pl?gene=SCN10A">https://www.genecards.org/cgi-bin/carddisp.pl?gene=SCN10A</a>       |
| MIR214    | MicroRNA 214                                               | RNA gene       | 21 | GC01M172234 | 1.664697886 | <a href="https://www.genecards.org/cgi-bin/carddisp.pl?gene=MIR214">https://www.genecards.org/cgi-bin/carddisp.pl?gene=MIR214</a>       |
| CLDN5     | Claudin 5                                                  | Protein coding | 42 | GC22M019523 | 1.663992047 | <a href="https://www.genecards.org/cgi-bin/carddisp.pl?gene=CLDN5">https://www.genecards.org/cgi-bin/carddisp.pl?gene=CLDN5</a>         |
| BIN1      | Bridging Integrator 1                                      | Protein coding | 46 | GC02M127048 | 1.661673188 | <a href="https://www.genecards.org/cgi-bin/carddisp.pl?gene=BIN1">https://www.genecards.org/cgi-bin/carddisp.pl?gene=BIN1</a>           |
| NRGN      | Neurogranin                                                | Protein coding | 38 | GC11P124739 | 1.660358667 | <a href="https://www.genecards.org/cgi-bin/carddisp.pl?gene=NRGN">https://www.genecards.org/cgi-bin/carddisp.pl?gene=NRGN</a>           |
| AHSP      | $\alpha$ Hemoglobin Stabilizing Protein                    | Protein coding | 36 | GC16P031527 | 1.659368753 | <a href="https://www.genecards.org/cgi-bin/carddisp.pl?gene=AHSP">https://www.genecards.org/cgi-bin/carddisp.pl?gene=AHSP</a>           |
| HOMER1    | Homer Scaffold Protein 1                                   | Protein coding | 41 | GC05M079372 | 1.65831387  | <a href="https://www.genecards.org/cgi-bin/carddisp.pl?gene=HOMER1">https://www.genecards.org/cgi-bin/carddisp.pl?gene=HOMER1</a>       |
| HOMER2    | Homer Scaffold Protein 2                                   | Protein coding | 41 | GC15M083442 | 1.65831387  | <a href="https://www.genecards.org/cgi-bin/carddisp.pl?gene=HOMER2">https://www.genecards.org/cgi-bin/carddisp.pl?gene=HOMER2</a>       |
| LMNB2     | Lamin B2                                                   | Protein coding | 44 | GC19M002556 | 1.656163931 | <a href="https://www.genecards.org/cgi-bin/carddisp.pl?gene=LMNB2">https://www.genecards.org/cgi-bin/carddisp.pl?gene=LMNB2</a>         |
| SLC4A1    | Solute Carrier Family 4 Member 1 (Diego Blood Group)       | Protein coding | 47 | GC17M044467 | 1.654229045 | <a href="https://www.genecards.org/cgi-bin/carddisp.pl?gene=SLC4A1">https://www.genecards.org/cgi-bin/carddisp.pl?gene=SLC4A1</a>       |
| MIR599    | MicroRNA 599                                               | RNA gene       | 14 | GC08M099537 | 1.653081894 | <a href="https://www.genecards.org/cgi-bin/carddisp.pl?gene=MIR599">https://www.genecards.org/cgi-bin/carddisp.pl?gene=MIR599</a>       |
| ACSS1     | Acyl-CoA Synthetase Short Chain Family Member 1            | Protein coding | 40 | GC20M024986 | 1.650308251 | <a href="https://www.genecards.org/cgi-bin/carddisp.pl?gene=ACSS1">https://www.genecards.org/cgi-bin/carddisp.pl?gene=ACSS1</a>         |
| TLR5      | Toll Like Receptor 5                                       | Protein coding | 47 | GC01M223185 | 1.649648905 | <a href="https://www.genecards.org/cgi-bin/carddisp.pl?gene=TLR5">https://www.genecards.org/cgi-bin/carddisp.pl?gene=TLR5</a>           |
| HTR4      | 5-Hydroxytryptamine Receptor 4                             | Protein coding | 45 | GC05M148451 | 1.647659063 | <a href="https://www.genecards.org/cgi-bin/carddisp.pl?gene=HTR4">https://www.genecards.org/cgi-bin/carddisp.pl?gene=HTR4</a>           |
| TRAF6     | TNF Receptor Associated Factor 6                           | Protein coding | 46 | GC11M036467 | 1.647260666 | <a href="https://www.genecards.org/cgi-bin/carddisp.pl?gene=TRAF6">https://www.genecards.org/cgi-bin/carddisp.pl?gene=TRAF6</a>         |
| FGF14     | Fibroblast Growth Factor 14                                | Protein coding | 44 | GC13M101710 | 1.647044778 | <a href="https://www.genecards.org/cgi-bin/carddisp.pl?gene=FGF14">https://www.genecards.org/cgi-bin/carddisp.pl?gene=FGF14</a>         |
| MCF2L     | MCF.2 Cell Line Derived Transforming Sequence Like         | Protein coding | 43 | GC13P112894 | 1.645362616 | <a href="https://www.genecards.org/cgi-bin/carddisp.pl?gene=MCF2L">https://www.genecards.org/cgi-bin/carddisp.pl?gene=MCF2L</a>         |
| ORM1      | Orosomucoid 1                                              | Protein coding | 40 | GC09P114323 | 1.645362616 | <a href="https://www.genecards.org/cgi-bin/carddisp.pl?gene=ORM1">https://www.genecards.org/cgi-bin/carddisp.pl?gene=ORM1</a>           |
| ENOX1     | Ecto-NOX Disulfide-Thiol Exchanger 1                       | Protein coding | 37 | GC13M043213 | 1.645362616 | <a href="https://www.genecards.org/cgi-bin/carddisp.pl?gene=ENOX1">https://www.genecards.org/cgi-bin/carddisp.pl?gene=ENOX1</a>         |
| CFHR4     | Complement Factor H Related 4                              | Protein coding | 36 | GC01P196888 | 1.645362616 | <a href="https://www.genecards.org/cgi-bin/carddisp.pl?gene=CFHR4">https://www.genecards.org/cgi-bin/carddisp.pl?gene=CFHR4</a>         |
| ZBTB41    | Zinc Finger And BTB Domain Containing 41                   | Protein coding | 31 | GC01M197153 | 1.645362616 | <a href="https://www.genecards.org/cgi-bin/carddisp.pl?gene=ZBTB41">https://www.genecards.org/cgi-bin/carddisp.pl?gene=ZBTB41</a>       |
| LINC02145 | Long Intergenic Non-Protein Coding RNA 2145                | RNA gene       | 15 | GC05M006311 | 1.645362616 | <a href="https://www.genecards.org/cgi-bin/carddisp.pl?gene=LINC02145">https://www.genecards.org/cgi-bin/carddisp.pl?gene=LINC02145</a> |
| DNAJC6    | DnaJ Heat Shock Protein Family (Hsp40) Member C6           | Protein coding | 43 | GC01P065248 | 1.644636989 | <a href="https://www.genecards.org/cgi-bin/carddisp.pl?gene=DNAJC6">https://www.genecards.org/cgi-bin/carddisp.pl?gene=DNAJC6</a>       |
| CPLX2     | Complexin 2                                                | Protein coding | 40 | GC05P175797 | 1.644636989 | <a href="https://www.genecards.org/cgi-bin/carddisp.pl?gene=CPLX2">https://www.genecards.org/cgi-bin/carddisp.pl?gene=CPLX2</a>         |
| WDR37     | WD Repeat Domain 37                                        | Protein coding | 37 | GC10P001072 | 1.644636989 | <a href="https://www.genecards.org/cgi-bin/carddisp.pl?gene=WDR37">https://www.genecards.org/cgi-bin/carddisp.pl?gene=WDR37</a>         |
| THY1      | Thy-1 Cell Surface Antigen                                 | Protein coding | 42 | GC11M119417 | 1.642941236 | <a href="https://www.genecards.org/cgi-bin/carddisp.pl?gene=THY1">https://www.genecards.org/cgi-bin/carddisp.pl?gene=THY1</a>           |
| MAPK9     | Mitogen-Activated Protein Kinase 9                         | Protein coding | 48 | GC05M180235 | 1.642457008 | <a href="https://www.genecards.org/cgi-bin/carddisp.pl?gene=MAPK9">https://www.genecards.org/cgi-bin/carddisp.pl?gene=MAPK9</a>         |
| TRAPPC11  | Trafficking Protein Particle Complex Subunit 11            | Protein coding | 35 | GC04P183659 | 1.640725851 | <a href="https://www.genecards.org/cgi-bin/carddisp.pl?gene=TRAPPC11">https://www.genecards.org/cgi-bin/carddisp.pl?gene=TRAPPC11</a>   |
| PCSK2     | Proprotein Convertase Subtilisin/Kexin Type 2              | Protein coding | 41 | GC20P017226 | 1.639915824 | <a href="https://www.genecards.org/cgi-bin/carddisp.pl?gene=PCSK2">https://www.genecards.org/cgi-bin/carddisp.pl?gene=PCSK2</a>         |
| SIRT6     | Sirtuin 6                                                  | Protein coding | 45 | GC19M004174 | 1.639091969 | <a href="https://www.genecards.org/cgi-bin/carddisp.pl?gene=SIRT6">https://www.genecards.org/cgi-bin/carddisp.pl?gene=SIRT6</a>         |
| CAPN1     | Calpain 1                                                  | Protein coding | 49 | GC11P065336 | 1.638780594 | <a href="https://www.genecards.org/cgi-bin/carddisp.pl?gene=CAPN1">https://www.genecards.org/cgi-bin/carddisp.pl?gene=CAPN1</a>         |
| MSTN      | Myostatin                                                  | Protein coding | 44 | GC02M190055 | 1.635808587 | <a href="https://www.genecards.org/cgi-bin/carddisp.pl?gene=MSTN">https://www.genecards.org/cgi-bin/carddisp.pl?gene=MSTN</a>           |
| SDHA      | Succinate Dehydrogenase Complex Flavoprotein Subunit A     | Protein coding | 48 | GC05P000208 | 1.635778308 | <a href="https://www.genecards.org/cgi-bin/carddisp.pl?gene=SDHA">https://www.genecards.org/cgi-bin/carddisp.pl?gene=SDHA</a>           |
| CMC4      | C-X9-C Motif Containing 4                                  | Protein coding | 28 | GC0XM155061 | 1.63575685  | <a href="https://www.genecards.org/cgi-bin/carddisp.pl?gene=CMC4">https://www.genecards.org/cgi-bin/carddisp.pl?gene=CMC4</a>           |
| SLC6A8    | Solute Carrier Family 6 Member 8                           | Protein coding | 45 | GC0XP153688 | 1.635644197 | <a href="https://www.genecards.org/cgi-bin/carddisp.pl?gene=SLC6A8">https://www.genecards.org/cgi-bin/carddisp.pl?gene=SLC6A8</a>       |
| AARS1     | Alanyl-TRNA Synthetase 1                                   | Protein coding | 36 | GC16M070372 | 1.635644197 | <a href="https://www.genecards.org/cgi-bin/carddisp.pl?gene=AARS1">https://www.genecards.org/cgi-bin/carddisp.pl?gene=AARS1</a>         |
| PPP1R1B   | Protein Phosphatase 1 Regulatory Inhibitor Subunit 1B      | Protein coding | 44 | GC17P039626 | 1.635357857 | <a href="https://www.genecards.org/cgi-bin/carddisp.pl?gene=PPP1R1B">https://www.genecards.org/cgi-bin/carddisp.pl?gene=PPP1R1B</a>     |
| USP36     | Ubiquitin Specific Peptidase 36                            | Protein coding | 38 | GC17M078787 | 1.635200858 | <a href="https://www.genecards.org/cgi-bin/carddisp.pl?gene=USP36">https://www.genecards.org/cgi-bin/carddisp.pl?gene=USP36</a>         |
| MIR30D    | MicroRNA 30d                                               | RNA gene       | 18 | GC08M134804 | 1.634542465 | <a href="https://www.genecards.org/cgi-bin/carddisp.pl?gene=MIR30D">https://www.genecards.org/cgi-bin/carddisp.pl?gene=MIR30D</a>       |
| NSF       | N-Ethylmaleimide Sensitive Factor, Vesicle Fusing ATPase   | Protein coding | 45 | GC17P046590 | 1.634270906 | <a href="https://www.genecards.org/cgi-bin/carddisp.pl?gene=NSF">https://www.genecards.org/cgi-bin/carddisp.pl?gene=NSF</a>             |
| MIR200C   | MicroRNA 200c                                              | RNA gene       | 22 | GC12P013192 | 1.632769227 | <a href="https://www.genecards.org/cgi-bin/carddisp.pl?gene=MIR200C">https://www.genecards.org/cgi-bin/carddisp.pl?gene=MIR200C</a>     |
| PLTP      | Phospholipid Transfer Protein                              | Protein coding | 43 | GC20M045898 | 1.630895376 | <a href="https://www.genecards.org/cgi-bin/carddisp.pl?gene=PLTP">https://www.genecards.org/cgi-bin/carddisp.pl?gene=PLTP</a>           |
| MIR212    | MicroRNA 212                                               | RNA gene       | 19 | GC17M002050 | 1.630085707 | <a href="https://www.genecards.org/cgi-bin/carddisp.pl?gene=MIR212">https://www.genecards.org/cgi-bin/carddisp.pl?gene=MIR212</a>       |
| F2RL2     | Coagulation Factor II Thrombin Receptor Like 2             | Protein coding | 41 | GC05M076615 | 1.627726793 | <a href="https://www.genecards.org/cgi-bin/carddisp.pl?gene=F2RL2">https://www.genecards.org/cgi-bin/carddisp.pl?gene=F2RL2</a>         |
| NOX1      | NADPH Oxidase 1                                            | Protein coding | 42 | GC0XM100843 | 1.626969457 | <a href="https://www.genecards.org/cgi-bin/carddisp.pl?gene=NOX1">https://www.genecards.org/cgi-bin/carddisp.pl?gene=NOX1</a>           |
| HRH3      | Histamine Receptor H3                                      | Protein coding | 43 | GC20M062214 | 1.626932859 | <a href="https://www.genecards.org/cgi-bin/carddisp.pl?gene=HRH3">https://www.genecards.org/cgi-bin/carddisp.pl?gene=HRH3</a>           |
| MX1       | MX Dynamin Like GTPase 1                                   | Protein coding | 42 | GC21P041420 | 1.623543978 | <a href="https://www.genecards.org/cgi-bin/carddisp.pl?gene=MX1">https://www.genecards.org/cgi-bin/carddisp.pl?gene=MX1</a>             |
| NPY1R     | Neuropeptide Y Receptor Y1                                 | Protein coding | 46 | GC04M163323 | 1.623469472 | <a href="https://www.genecards.org/cgi-bin/carddisp.pl?gene=NPY1R">https://www.genecards.org/cgi-bin/carddisp.pl?gene=NPY1R</a>         |
| RTN4R     | Reticulon 4 Receptor                                       | Protein coding | 42 | GC22M020241 | 1.621795774 | <a href="https://www.genecards.org/cgi-bin/carddisp.pl?gene=RTN4R">https://www.genecards.org/cgi-bin/carddisp.pl?gene=RTN4R</a>         |
| SLC9A3    | Solute Carrier Family 9 Member A3                          | Protein coding | 47 | GC05M000472 | 1.62157023  | <a href="https://www.genecards.org/cgi-bin/carddisp.pl?gene=SLC9A3">https://www.genecards.org/cgi-bin/carddisp.pl?gene=SLC9A3</a>       |
| FADD      | Fas Associated Via Death Domain                            | Protein coding | 47 | GC11P070203 | 1.620568037 | <a href="https://www.genecards.org/cgi-bin/carddisp.pl?gene=FADD">https://www.genecards.org/cgi-bin/carddisp.pl?gene=FADD</a>           |
| RNF146    | Ring Finger Protein 146                                    | Protein coding | 37 | GC06P127266 | 1.620564103 | <a href="https://www.genecards.org/cgi-bin/carddisp.pl?gene=RNF146">https://www.genecards.org/cgi-bin/carddisp.pl?gene=RNF146</a>       |
| STT3B     | STT3 Oligosaccharyltransferase Complex Catalytic Subunit B | Protein coding | 43 | GC03P031550 | 1.616494894 | <a href="https://www.genecards.org/cgi-bin/carddisp.pl?gene=STT3B">https://www.genecards.org/cgi-bin/carddisp.pl?gene=STT3B</a>         |
| IL1RAPL2  | Interleukin 1 Receptor Accessory Protein Like 2            | Protein coding | 38 | GC0XP104566 | 1.615890741 | <a href="https://www.genecards.org/cgi-bin/carddisp.pl?gene=IL1RAPL2">https://www.genecards.org/cgi-bin/carddisp.pl?gene=IL1RAPL2</a>   |
| COX14     | Cytochrome C Oxidase Assembly Factor COX14                 | Protein coding | 36 | GC12P050111 | 1.61446166  | <a href="https://www.genecards.org/cgi-bin/carddisp.pl?gene=COX14">https://www.genecards.org/cgi-bin/carddisp.pl?gene=COX14</a>         |
| PLA2G3    | Phospholipase A2 Group III                                 | Protein coding | 37 | GC22M031364 | 1.611379147 | <a href="https://www.genecards.org/cgi-bin/carddisp.pl?gene=PLA2G3">https://www.genecards.org/cgi-bin/carddisp.pl?gene=PLA2G3</a>       |
| CALCR     | Calcitonin Receptor                                        | Protein coding | 48 | GC07M093424 | 1.610973597 | <a href="https://www.genecards.org/cgi-bin/carddisp.pl?gene=CALCR">https://www.genecards.org/cgi-bin/carddisp.pl?gene=CALCR</a>         |
| MIR199A2  | MicroRNA 199a-2                                            | RNA gene       | 20 | GC01M172235 | 1.610823035 | <a href="https://www.genecards.org/cgi-bin/carddisp.pl?gene=MIR199A2">https://www.genecards.org/cgi-bin/carddisp.pl?gene=MIR199A2</a>   |
| SORCS2    | Sortilin Related VPS10 Domain Containing Receptor 2        | Protein coding | 36 | GC04P007196 | 1.609295368 | <a href="https://www.genecards.org/cgi-bin/carddisp.pl?gene=SORCS2">https://www.genecards.org/cgi-bin/carddisp.pl?gene=SORCS2</a>       |
| CXCL2     | C-X-C Motif Chemokine Ligand 2                             | Protein coding | 40 | GC04M074097 | 1.608901143 | <a href="https://www.genecards.org/cgi-bin/carddisp.pl?gene=CXCL2">https://www.genecards.org/cgi-bin/carddisp.pl?gene=CXCL2</a>         |

|               |                                                              |                |    |             |             |                                                                  |
|---------------|--------------------------------------------------------------|----------------|----|-------------|-------------|------------------------------------------------------------------|
| SIRT2         | Sirtuin 2                                                    | Protein coding | 47 | GC19M038878 | 1.607417822 | https://www.genecards.org/cgi-bin/carddisp.pl?gene=SIRT2         |
| MIR4437       | MicroRNA 4437                                                | RNA gene       | 13 | GC02M181305 | 1.60505259  | https://www.genecards.org/cgi-bin/carddisp.pl?gene=MIR4437       |
| GRK3          | G Protein-Coupled Receptor Kinase 3                          | Protein coding | 38 | GC22P027519 | 1.604694009 | https://www.genecards.org/cgi-bin/carddisp.pl?gene=GRK3          |
| SNRNP70       | Small Nuclear Ribonucleoprotein U1 Subunit 70                | Protein coding | 38 | GC19P049085 | 1.604596615 | https://www.genecards.org/cgi-bin/carddisp.pl?gene=SNRNP70       |
| CCL18         | C-C Motif Chemokine Ligand 18                                | Protein coding | 37 | GC17P036064 | 1.604405165 | https://www.genecards.org/cgi-bin/carddisp.pl?gene=CCL18         |
| PDE4A         | Phosphodiesterase 4A                                         | Protein coding | 45 | GC19P010416 | 1.602807045 | https://www.genecards.org/cgi-bin/carddisp.pl?gene=PDE4A         |
| SRGAP3        | SLIT-ROBO Rho GTPase Activating Protein 3                    | Protein coding | 41 | GC03M008980 | 1.600413084 | https://www.genecards.org/cgi-bin/carddisp.pl?gene=SRGAP3        |
| DPP10         | Dipeptidyl Peptidase Like 10                                 | Protein coding | 40 | GC02P114442 | 1.600413084 | https://www.genecards.org/cgi-bin/carddisp.pl?gene=DPP10         |
| RUFY1         | RUN And FYVE Domain Containing 1                             | Protein coding | 38 | GC05P179550 | 1.600413084 | https://www.genecards.org/cgi-bin/carddisp.pl?gene=RUFY1         |
| CAPN2         | Calpain 2                                                    | Protein coding | 47 | GC01P223701 | 1.599541426 | https://www.genecards.org/cgi-bin/carddisp.pl?gene=CAPN2         |
| PSMB9         | Proteasome 20S Subunit $\beta$ 9                             | Protein coding | 46 | GC06P058343 | 1.598861694 | https://www.genecards.org/cgi-bin/carddisp.pl?gene=PSMB9         |
| MYBPC1        | Myosin Binding Protein C1                                    | Protein coding | 43 | GC12P101568 | 1.594045758 | https://www.genecards.org/cgi-bin/carddisp.pl?gene=MYBPC1        |
| SLC2A9        | Solute Carrier Family 2 Member 9                             | Protein coding | 45 | GC04M009772 | 1.592357278 | https://www.genecards.org/cgi-bin/carddisp.pl?gene=SLC2A9        |
| DPYSL2        | Dihydropyrimidinase Like 2                                   | Protein coding | 45 | GC08P026514 | 1.591951847 | https://www.genecards.org/cgi-bin/carddisp.pl?gene=DPYSL2        |
| PDYN          | Prodynorphin                                                 | Protein coding | 44 | GC20M001978 | 1.590532064 | https://www.genecards.org/cgi-bin/carddisp.pl?gene=PDYN          |
| PMF1          | Polyamine Modulated Factor 1                                 | Protein coding | 37 | GC01P156212 | 1.590415478 | https://www.genecards.org/cgi-bin/carddisp.pl?gene=PMF1          |
| PMF1-BGLAP    | PMF1-BGLAP Readthrough                                       | Protein coding | 22 | GC01P156213 | 1.590415478 | https://www.genecards.org/cgi-bin/carddisp.pl?gene=PMF1-BGLAP    |
| PDGFC         | Platelet Derived Growth Factor C                             | Protein coding | 43 | GC04M156760 | 1.590159416 | https://www.genecards.org/cgi-bin/carddisp.pl?gene=PDGFC         |
| DKK3          | Dickkopf WNT Signaling Pathway Inhibitor 3                   | Protein coding | 40 | GC11M011962 | 1.590159416 | https://www.genecards.org/cgi-bin/carddisp.pl?gene=DKK3          |
| SERPINA5      | Serpin Family A Member 5                                     | Protein coding | 43 | GC14P094563 | 1.589998364 | https://www.genecards.org/cgi-bin/carddisp.pl?gene=SERPINA5      |
| IL2RB         | Interleukin 2 Receptor Subunit $\beta$                       | Protein coding | 48 | GC22M037125 | 1.589775562 | https://www.genecards.org/cgi-bin/carddisp.pl?gene=IL2RB         |
| SYNE1         | Spectrin Repeat Containing Nuclear Envelope Protein 1        | Protein coding | 41 | GC06M152121 | 1.589002848 | https://www.genecards.org/cgi-bin/carddisp.pl?gene=SYNE1         |
| PYGB          | Glycogen Phosphorylase B                                     | Protein coding | 44 | GC20P025248 | 1.588316202 | https://www.genecards.org/cgi-bin/carddisp.pl?gene=PYGB          |
| PSPH          | Phosphoserine Phosphatase                                    | Protein coding | 46 | GC07M056010 | 1.586403489 | https://www.genecards.org/cgi-bin/carddisp.pl?gene=PSPH          |
| VSNL1         | Visinin Like 1                                               | Protein coding | 41 | GC02P017539 | 1.585964203 | https://www.genecards.org/cgi-bin/carddisp.pl?gene=VSNL1         |
| PNMT          | Phenylethanolamine N-Methyltransferase                       | Protein coding | 44 | GC17P039667 | 1.583015203 | https://www.genecards.org/cgi-bin/carddisp.pl?gene=PNMT          |
| ATP13A2       | ATPase Cation Transporting 13A2                              | Protein coding | 42 | GC01M016985 | 1.581985712 | https://www.genecards.org/cgi-bin/carddisp.pl?gene=ATP13A2       |
| SLC25A37      | Solute Carrier Family 25 Member 37                           | Protein coding | 38 | GC08P023528 | 1.58163929  | https://www.genecards.org/cgi-bin/carddisp.pl?gene=SLC25A37      |
| MAPKAPK5      | MAPK Activated Protein Kinase 5                              | Protein coding | 44 | GC12P111842 | 1.576555848 | https://www.genecards.org/cgi-bin/carddisp.pl?gene=MAPKAPK5      |
| HECTD4        | HECT Domain E3 Ubiquitin Protein Ligase 4                    | Protein coding | 30 | GC12M112160 | 1.576555848 | https://www.genecards.org/cgi-bin/carddisp.pl?gene=HECTD4        |
| PHETA1        | PH Domain Containing Endocytic Trafficking Adaptor 1         | Protein coding | 27 | GC12M111361 | 1.576555848 | https://www.genecards.org/cgi-bin/carddisp.pl?gene=PHETA1        |
| TMEM116       | Transmembrane Protein 116                                    | Protein coding | 26 | GC12M111894 | 1.576555848 | https://www.genecards.org/cgi-bin/carddisp.pl?gene=TMEM116       |
| ADAM1A        | ADAM Metallopeptidase Domain 1A (Pseudogene)                 | Pseudogene     | 15 | GC12P111899 | 1.576555848 | https://www.genecards.org/cgi-bin/carddisp.pl?gene=ADAM1A        |
| PCNPP1        | PEST Containing Nuclear Protein Pseudogene 1                 | Pseudogene     | 9  | GC12M111666 | 1.576555848 | https://www.genecards.org/cgi-bin/carddisp.pl?gene=PCNPP1        |
| lnc-FAM109A-1 |                                                              | RNA gene       | 4  | GC12M111488 | 1.576555848 | https://www.genecards.org/cgi-bin/carddisp.pl?gene=lnc-FAM109A-1 |
| HSALNG0094037 |                                                              | RNA gene       | 4  | GC12P111432 | 1.576555848 | https://www.genecards.org/cgi-bin/carddisp.pl?gene=HSALNG0094037 |
| RF00017-1164  |                                                              | RNA gene       | 4  | GC12M111250 | 1.576555848 | https://www.genecards.org/cgi-bin/carddisp.pl?gene=RF00017-1164  |
| HSALNG0094038 |                                                              | RNA gene       | 3  | GC12P111446 | 1.576555848 | https://www.genecards.org/cgi-bin/carddisp.pl?gene=HSALNG0094038 |
| piR-48007     |                                                              | RNA gene       | 3  | GC12M111490 | 1.576555848 | https://www.genecards.org/cgi-bin/carddisp.pl?gene=piR-48007     |
| piR-51327     |                                                              | RNA gene       | 3  | GC12M111437 | 1.576555848 | https://www.genecards.org/cgi-bin/carddisp.pl?gene=piR-51327     |
| piR-36455     |                                                              | RNA gene       | 3  | GC12M111444 | 1.576555848 | https://www.genecards.org/cgi-bin/carddisp.pl?gene=piR-36455     |
| piR-38259     |                                                              | RNA gene       | 3  | GC12M111486 | 1.576555848 | https://www.genecards.org/cgi-bin/carddisp.pl?gene=piR-38259     |
| piR-50346     |                                                              | RNA gene       | 3  | GC12M111491 | 1.576555848 | https://www.genecards.org/cgi-bin/carddisp.pl?gene=piR-50346     |
| piR-51449     |                                                              | RNA gene       | 3  | GC12P111448 | 1.576555848 | https://www.genecards.org/cgi-bin/carddisp.pl?gene=piR-51449     |
| piR-56480-015 |                                                              | RNA gene       | 3  | GC12M111439 | 1.576555848 | https://www.genecards.org/cgi-bin/carddisp.pl?gene=piR-56480-015 |
| SLC13A5       | Solute Carrier Family 13 Member 5                            | Protein coding | 43 | GC17M006684 | 1.576158404 | https://www.genecards.org/cgi-bin/carddisp.pl?gene=SLC13A5       |
| TFAP2A        | Transcription Factor AP-2 $\alpha$                           | Protein coding | 47 | GC06M010393 | 1.575462937 | https://www.genecards.org/cgi-bin/carddisp.pl?gene=TFAP2A        |
| IGF2R         | Insulin Like Growth Factor 2 Receptor                        | Protein coding | 45 | GC06P159969 | 1.573665023 | https://www.genecards.org/cgi-bin/carddisp.pl?gene=IGF2R         |
| ARNT          | Aryl Hydrocarbon Receptor Nuclear Translocator               | Protein coding | 44 | GC01M150809 | 1.571814179 | https://www.genecards.org/cgi-bin/carddisp.pl?gene=ARNT          |
| FMO3          | Flavin Containing Dimethylaniline Monooxygenase 3            | Protein coding | 47 | GC01P171090 | 1.570537329 | https://www.genecards.org/cgi-bin/carddisp.pl?gene=FMO3          |
| DNM1          | Dynamin 1                                                    | Protein coding | 51 | GC09P128191 | 1.569339037 | https://www.genecards.org/cgi-bin/carddisp.pl?gene=DNM1          |
| DUSP2         | Dual Specificity Phosphatase 2                               | Protein coding | 41 | GC02M096447 | 1.569194555 | https://www.genecards.org/cgi-bin/carddisp.pl?gene=DUSP2         |
| PYGM          | Glycogen Phosphorylase, Muscle Associated                    | Protein coding | 47 | GC11M064746 | 1.565435529 | https://www.genecards.org/cgi-bin/carddisp.pl?gene=PYGM          |
| GABBR1        | $\gamma$ -Aminobutyric Acid Type B Receptor Subunit 1        | Protein coding | 47 | GC06M029555 | 1.565419912 | https://www.genecards.org/cgi-bin/carddisp.pl?gene=GABBR1        |
| CAV2          | Caveolin 2                                                   | Protein coding | 43 | GC07P116287 | 1.563236237 | https://www.genecards.org/cgi-bin/carddisp.pl?gene=CAV2          |
| LMNB1         | Lamin B1                                                     | Protein coding | 48 | GC05P126776 | 1.562394977 | https://www.genecards.org/cgi-bin/carddisp.pl?gene=LMNB1         |
| TAB2          | TGF- $\beta$ Activated Kinase 1 (MAP3K7) Binding Protein 2   | Protein coding | 47 | GC06P149218 | 1.562083006 | https://www.genecards.org/cgi-bin/carddisp.pl?gene=TAB2          |
| NPY5R         | Neuropeptide Y Receptor Y5                                   | Protein coding | 43 | GC04P163343 | 1.560770631 | https://www.genecards.org/cgi-bin/carddisp.pl?gene=NPY5R         |
| DDIT4         | DNA Damage Inducible Transcript 4                            | Protein coding | 43 | GC10P072273 | 1.560736418 | https://www.genecards.org/cgi-bin/carddisp.pl?gene=DDIT4         |
| TSPYL6        | TSPY Like 6                                                  | Protein coding | 33 | GC02M054253 | 1.557663679 | https://www.genecards.org/cgi-bin/carddisp.pl?gene=TSPYL6        |
| MIR503        | MicroRNA 503                                                 | RNA gene       | 18 | GC0XM134659 | 1.557663679 | https://www.genecards.org/cgi-bin/carddisp.pl?gene=MIR503        |
| HBA2          | Hemoglobin Subunit $\alpha$ 2                                | Protein coding | 42 | GC16P006100 | 1.557556391 | https://www.genecards.org/cgi-bin/carddisp.pl?gene=HBA2          |
| ATP12A        | ATPase H+/K+ Transporting Non-Gastric $\alpha$ 2 Subunit     | Protein coding | 43 | GC13P024680 | 1.555380225 | https://www.genecards.org/cgi-bin/carddisp.pl?gene=ATP12A        |
| ATP4A         | ATPase H+/K+ Transporting Subunit $\alpha$                   | Protein coding | 41 | GC19M048913 | 1.555380225 | https://www.genecards.org/cgi-bin/carddisp.pl?gene=ATP4A         |
| MACROD2       | Mono-ADP Ribosylhydrolase 2                                  | Protein coding | 36 | GC20P013925 | 1.554716587 | https://www.genecards.org/cgi-bin/carddisp.pl?gene=MACROD2       |
| ATP6AP2       | ATPase H+ Transporting Accessory Protein 2                   | Protein coding | 44 | GC0XP040582 | 1.551936865 | https://www.genecards.org/cgi-bin/carddisp.pl?gene=ATP6AP2       |
| CCN1          | Cellular Communication Network Factor 1                      | Protein coding | 30 | GC01P085581 | 1.550974369 | https://www.genecards.org/cgi-bin/carddisp.pl?gene=CCN1          |
| CTBP1         | C-Terminal Binding Protein 1                                 | Protein coding | 48 | GC04M001211 | 1.547422767 | https://www.genecards.org/cgi-bin/carddisp.pl?gene=CTBP1         |
| PTPRN2        | Protein Tyrosine Phosphatase Receptor Type N2                | Protein coding | 45 | GC07M157539 | 1.547422767 | https://www.genecards.org/cgi-bin/carddisp.pl?gene=PTPRN2        |
| TP73          | Tumor Protein P73                                            | Protein coding | 45 | GC01P003652 | 1.547422767 | https://www.genecards.org/cgi-bin/carddisp.pl?gene=TP73          |
| NCOR2         | Nuclear Receptor Corepressor 2                               | Protein coding | 44 | GC12M124324 | 1.547422767 | https://www.genecards.org/cgi-bin/carddisp.pl?gene=NCOR2         |
| EIF2AK1       | Eukaryotic Translation Initiation Factor 2 $\alpha$ Kinase 1 | Protein coding | 43 | GC07M006022 | 1.547422767 | https://www.genecards.org/cgi-bin/carddisp.pl?gene=EIF2AK1       |
| LZTR1         | Leucine Zipper Like Transcription Regulator 1                | Protein coding | 43 | GC22P021221 | 1.547422767 | https://www.genecards.org/cgi-bin/carddisp.pl?gene=LZTR1         |
| AKAP12        | A-Kinase Anchoring Protein 12                                | Protein coding | 41 | GC06P151239 | 1.547422767 | https://www.genecards.org/cgi-bin/carddisp.pl?gene=AKAP12        |
| SBF1          | SET Binding Factor 1                                         | Protein coding | 41 | GC22M050445 | 1.547422767 | https://www.genecards.org/cgi-bin/carddisp.pl?gene=SBF1          |
| ACOT7         | Acyl-CoA Thioesterase 7                                      | Protein coding | 40 | GC01M006265 | 1.547422767 | https://www.genecards.org/cgi-bin/carddisp.pl?gene=ACOT7         |

|              |                                                                |                |    |             |             |                                                                                                                                               |
|--------------|----------------------------------------------------------------|----------------|----|-------------|-------------|-----------------------------------------------------------------------------------------------------------------------------------------------|
| TAF4         | TATA-Box Binding Protein Associated Factor 4                   | Protein coding | 40 | GC20M062012 | 1.547422767 | <a href="https://www.genecards.org/cgi-bin/carddisp.pl?gene=TAF4">https://www.genecards.org/cgi-bin/carddisp.pl?gene=TAF4</a>                 |
| PACS2        | Phosphofurin Acidic Cluster Sorting Protein 2                  | Protein coding | 39 | GC14P105300 | 1.547422767 | <a href="https://www.genecards.org/cgi-bin/carddisp.pl?gene=PACS2">https://www.genecards.org/cgi-bin/carddisp.pl?gene=PACS2</a>               |
| ARVCF        | ARVCF $\delta$ Catenin Family Member                           | Protein coding | 38 | GC22M019966 | 1.547422767 | <a href="https://www.genecards.org/cgi-bin/carddisp.pl?gene=ARVCF">https://www.genecards.org/cgi-bin/carddisp.pl?gene=ARVCF</a>               |
| BAK1         | BCL2 Antagonist/Killer 1                                       | Protein coding | 44 | GC06M033572 | 1.547126532 | <a href="https://www.genecards.org/cgi-bin/carddisp.pl?gene=BAK1">https://www.genecards.org/cgi-bin/carddisp.pl?gene=BAK1</a>                 |
| FGFR4        | Fibroblast Growth Factor Receptor 4                            | Protein coding | 51 | GC05P177086 | 1.545475483 | <a href="https://www.genecards.org/cgi-bin/carddisp.pl?gene=FGFR4">https://www.genecards.org/cgi-bin/carddisp.pl?gene=FGFR4</a>               |
| CDKN1A       | Cyclin Dependent Kinase Inhibitor 1A                           | Protein coding | 48 | GC06P058459 | 1.544131756 | <a href="https://www.genecards.org/cgi-bin/carddisp.pl?gene=CDKN1A">https://www.genecards.org/cgi-bin/carddisp.pl?gene=CDKN1A</a>             |
| KIF16B       | Kinesin Family Member 16B                                      | Protein coding | 37 | GC20M016272 | 1.543681979 | <a href="https://www.genecards.org/cgi-bin/carddisp.pl?gene=KIF16B">https://www.genecards.org/cgi-bin/carddisp.pl?gene=KIF16B</a>             |
| CACNA1D      | Calcium Voltage-Gated Channel Subunit $\alpha$ 1 D             | Protein coding | 47 | GC03P053328 | 1.542826533 | <a href="https://www.genecards.org/cgi-bin/carddisp.pl?gene=CACNA1D">https://www.genecards.org/cgi-bin/carddisp.pl?gene=CACNA1D</a>           |
| OBSCN        | Obscurin, Cytoskeletal Calmodulin And Titin-Interacting RhoGEF | Protein coding | 39 | GC01P228208 | 1.542430401 | <a href="https://www.genecards.org/cgi-bin/carddisp.pl?gene=OBSCN">https://www.genecards.org/cgi-bin/carddisp.pl?gene=OBSCN</a>               |
| COMP         | Cartilage Oligomeric Matrix Protein                            | Protein coding | 48 | GC19M018783 | 1.542316914 | <a href="https://www.genecards.org/cgi-bin/carddisp.pl?gene=COMP">https://www.genecards.org/cgi-bin/carddisp.pl?gene=COMP</a>                 |
| NPHS1        | NPHS1 Adhesion Molecule, Nephrin                               | Protein coding | 45 | GC19M035825 | 1.542160988 | <a href="https://www.genecards.org/cgi-bin/carddisp.pl?gene=NPHS1">https://www.genecards.org/cgi-bin/carddisp.pl?gene=NPHS1</a>               |
| PLCB2        | Phospholipase C $\beta$ 2                                      | Protein coding | 47 | GC15M040278 | 1.54177618  | <a href="https://www.genecards.org/cgi-bin/carddisp.pl?gene=PLCB2">https://www.genecards.org/cgi-bin/carddisp.pl?gene=PLCB2</a>               |
| SAG          | S-Antigen Visual Arrestin                                      | Protein coding | 45 | GC02P233333 | 1.541589737 | <a href="https://www.genecards.org/cgi-bin/carddisp.pl?gene=SAG">https://www.genecards.org/cgi-bin/carddisp.pl?gene=SAG</a>                   |
| TLK1         | Tousled Like Kinase 1                                          | Protein coding | 43 | GC02M170990 | 1.54062748  | <a href="https://www.genecards.org/cgi-bin/carddisp.pl?gene=TLK1">https://www.genecards.org/cgi-bin/carddisp.pl?gene=TLK1</a>                 |
| ZNF208       | Zinc Finger Protein 208                                        | Protein coding | 30 | GC19M027266 | 1.54062748  | <a href="https://www.genecards.org/cgi-bin/carddisp.pl?gene=ZNF208">https://www.genecards.org/cgi-bin/carddisp.pl?gene=ZNF208</a>             |
| DECRI        | 2,4-Dienoyl-CoA Reductase 1                                    | Protein coding | 41 | GC08P090001 | 1.539787292 | <a href="https://www.genecards.org/cgi-bin/carddisp.pl?gene=DECRI">https://www.genecards.org/cgi-bin/carddisp.pl?gene=DECRI</a>               |
| MIR4271      | MicroRNA 4271                                                  | RNA gene       | 11 | GC03P049274 | 1.539787292 | <a href="https://www.genecards.org/cgi-bin/carddisp.pl?gene=MIR4271">https://www.genecards.org/cgi-bin/carddisp.pl?gene=MIR4271</a>           |
| CTNNA1       | Catenin $\alpha$ 1                                             | Protein coding | 48 | GC05P138613 | 1.538938999 | <a href="https://www.genecards.org/cgi-bin/carddisp.pl?gene=CTNNA1">https://www.genecards.org/cgi-bin/carddisp.pl?gene=CTNNA1</a>             |
| CXCR5        | C-X-C Motif Chemokine Receptor 5                               | Protein coding | 41 | GC11P118912 | 1.537840486 | <a href="https://www.genecards.org/cgi-bin/carddisp.pl?gene=CXCR5">https://www.genecards.org/cgi-bin/carddisp.pl?gene=CXCR5</a>               |
| MERTK        | MER Proto-Oncogene, Tyrosine Kinase                            | Protein coding | 50 | GC02P111898 | 1.537381649 | <a href="https://www.genecards.org/cgi-bin/carddisp.pl?gene=MERTK">https://www.genecards.org/cgi-bin/carddisp.pl?gene=MERTK</a>               |
| PSMB7        | Proteasome 20S Subunit $\beta$ 7                               | Protein coding | 45 | GC09M124353 | 1.536204696 | <a href="https://www.genecards.org/cgi-bin/carddisp.pl?gene=PSMB7">https://www.genecards.org/cgi-bin/carddisp.pl?gene=PSMB7</a>               |
| CD74         | CD74 Molecule                                                  | Protein coding | 43 | GC05M150378 | 1.536204696 | <a href="https://www.genecards.org/cgi-bin/carddisp.pl?gene=CD74">https://www.genecards.org/cgi-bin/carddisp.pl?gene=CD74</a>                 |
| AFP          | $\alpha$ Fetoprotein                                           | Protein coding | 45 | GC04P073431 | 1.534379721 | <a href="https://www.genecards.org/cgi-bin/carddisp.pl?gene=AFP">https://www.genecards.org/cgi-bin/carddisp.pl?gene=AFP</a>                   |
| PTCSC3       | Papillary Thyroid Carcinoma Susceptibility Candidate 3         | RNA gene       | 16 | GC14M036135 | 1.532673836 | <a href="https://www.genecards.org/cgi-bin/carddisp.pl?gene=PTCSC3">https://www.genecards.org/cgi-bin/carddisp.pl?gene=PTCSC3</a>             |
| SDC1         | Syndecan 1                                                     | Protein coding | 43 | GC02M020200 | 1.532574177 | <a href="https://www.genecards.org/cgi-bin/carddisp.pl?gene=SDC1">https://www.genecards.org/cgi-bin/carddisp.pl?gene=SDC1</a>                 |
| P2RX2        | Purinergic Receptor P2X 2                                      | Protein coding | 44 | GC12P132618 | 1.531621218 | <a href="https://www.genecards.org/cgi-bin/carddisp.pl?gene=P2RX2">https://www.genecards.org/cgi-bin/carddisp.pl?gene=P2RX2</a>               |
| ZNF318       | Zinc Finger Protein 318                                        | Protein coding | 36 | GC06M049367 | 1.531493545 | <a href="https://www.genecards.org/cgi-bin/carddisp.pl?gene=ZNF318">https://www.genecards.org/cgi-bin/carddisp.pl?gene=ZNF318</a>             |
| OSMR         | Oncostatin M Receptor                                          | Protein coding | 45 | GC05P038845 | 1.529595733 | <a href="https://www.genecards.org/cgi-bin/carddisp.pl?gene=OSMR">https://www.genecards.org/cgi-bin/carddisp.pl?gene=OSMR</a>                 |
| DMRTA1       | DMRT Like Family A1                                            | Protein coding | 36 | GC09P022436 | 1.52721262  | <a href="https://www.genecards.org/cgi-bin/carddisp.pl?gene=DMRTA1">https://www.genecards.org/cgi-bin/carddisp.pl?gene=DMRTA1</a>             |
| MED22        | Mediator Complex Subunit 22                                    | Protein coding | 36 | GC09M133338 | 1.52721262  | <a href="https://www.genecards.org/cgi-bin/carddisp.pl?gene=MED22">https://www.genecards.org/cgi-bin/carddisp.pl?gene=MED22</a>               |
| SURF6        | Surfeit 6                                                      | Protein coding | 36 | GC09M133331 | 1.52721262  | <a href="https://www.genecards.org/cgi-bin/carddisp.pl?gene=SURF6">https://www.genecards.org/cgi-bin/carddisp.pl?gene=SURF6</a>               |
| HGS          | Hepatocyte Growth Factor-Regulated Tyrosine Kinase Substrate   | Protein coding | 44 | GC17P081683 | 1.523117781 | <a href="https://www.genecards.org/cgi-bin/carddisp.pl?gene=HGS">https://www.genecards.org/cgi-bin/carddisp.pl?gene=HGS</a>                   |
| CR1          | Complement C3b/C4b Receptor 1 (Knops Blood Group)              | Protein coding | 45 | GC01P207496 | 1.520680666 | <a href="https://www.genecards.org/cgi-bin/carddisp.pl?gene=CR1">https://www.genecards.org/cgi-bin/carddisp.pl?gene=CR1</a>                   |
| EFEMP2       | EGF Containing Fibulin Extracellular Matrix Protein 2          | Protein coding | 43 | GC11M071732 | 1.520484805 | <a href="https://www.genecards.org/cgi-bin/carddisp.pl?gene=EFEMP2">https://www.genecards.org/cgi-bin/carddisp.pl?gene=EFEMP2</a>             |
| MIR208A      | MicroRNA 208a                                                  | RNA gene       | 18 | GC14M023388 | 1.519993186 | <a href="https://www.genecards.org/cgi-bin/carddisp.pl?gene=MIR208A">https://www.genecards.org/cgi-bin/carddisp.pl?gene=MIR208A</a>           |
| DNM1L        | Dynamin 1 Like                                                 | Protein coding | 47 | GC12P032679 | 1.516247034 | <a href="https://www.genecards.org/cgi-bin/carddisp.pl?gene=DNM1L">https://www.genecards.org/cgi-bin/carddisp.pl?gene=DNM1L</a>               |
| BLM          | BLM RecQ Like Helicase                                         | Protein coding | 49 | GC15P090717 | 1.513609409 | <a href="https://www.genecards.org/cgi-bin/carddisp.pl?gene=BLM">https://www.genecards.org/cgi-bin/carddisp.pl?gene=BLM</a>                   |
| HAAO         | 3-Hydroxyanthranilate 3,4-Dioxygenase                          | Protein coding | 44 | GC02M042767 | 1.513609409 | <a href="https://www.genecards.org/cgi-bin/carddisp.pl?gene=HAAO">https://www.genecards.org/cgi-bin/carddisp.pl?gene=HAAO</a>                 |
| PLAA         | Phospholipase A2 Activating Protein                            | Protein coding | 44 | GC09M026903 | 1.513609409 | <a href="https://www.genecards.org/cgi-bin/carddisp.pl?gene=PLAA">https://www.genecards.org/cgi-bin/carddisp.pl?gene=PLAA</a>                 |
| CGA          | Glycoprotein Hormones, $\alpha$ Polypeptide                    | Protein coding | 43 | GC06M087085 | 1.513609409 | <a href="https://www.genecards.org/cgi-bin/carddisp.pl?gene=CGA">https://www.genecards.org/cgi-bin/carddisp.pl?gene=CGA</a>                   |
| FAF1         | Fas Associated Factor 1                                        | Protein coding | 43 | GC01M050439 | 1.513609409 | <a href="https://www.genecards.org/cgi-bin/carddisp.pl?gene=FAF1">https://www.genecards.org/cgi-bin/carddisp.pl?gene=FAF1</a>                 |
| RILP         | Rab Interacting Lysosomal Protein                              | Protein coding | 36 | GC17M001646 | 1.513609409 | <a href="https://www.genecards.org/cgi-bin/carddisp.pl?gene=RILP">https://www.genecards.org/cgi-bin/carddisp.pl?gene=RILP</a>                 |
| ELMOD1       | ELMO Domain Containing 1                                       | Protein coding | 34 | GC11P107592 | 1.513609409 | <a href="https://www.genecards.org/cgi-bin/carddisp.pl?gene=ELMOD1">https://www.genecards.org/cgi-bin/carddisp.pl?gene=ELMOD1</a>             |
| TSPEAR       | Thrombospondin Type Laminin G Domain And EAR Repeats           | Protein coding | 31 | GC21M044497 | 1.513609409 | <a href="https://www.genecards.org/cgi-bin/carddisp.pl?gene=TSPEAR">https://www.genecards.org/cgi-bin/carddisp.pl?gene=TSPEAR</a>             |
| ATPSCKMT     | ATP Synthase C Subunit Lysine N-Methyltransferase              | Protein coding | 27 | GC05M010225 | 1.513609409 | <a href="https://www.genecards.org/cgi-bin/carddisp.pl?gene=ATPSCKMT">https://www.genecards.org/cgi-bin/carddisp.pl?gene=ATPSCKMT</a>         |
| LOC100507346 | Uncharacterized LOC100507346                                   | RNA gene       | 9  | GC09P095463 | 1.513609409 | <a href="https://www.genecards.org/cgi-bin/carddisp.pl?gene=LOC100507346">https://www.genecards.org/cgi-bin/carddisp.pl?gene=LOC100507346</a> |
| MIR133B      | MicroRNA 133b                                                  | RNA gene       | 22 | GC06P052148 | 1.512851834 | <a href="https://www.genecards.org/cgi-bin/carddisp.pl?gene=MIR133B">https://www.genecards.org/cgi-bin/carddisp.pl?gene=MIR133B</a>           |
| SCT          | Secretin                                                       | Protein coding | 34 | GC11M000626 | 1.51108861  | <a href="https://www.genecards.org/cgi-bin/carddisp.pl?gene=SCT">https://www.genecards.org/cgi-bin/carddisp.pl?gene=SCT</a>                   |
| HSP90B1      | Heat Shock Protein 90 $\beta$ Family Member 1                  | Protein coding | 45 | GC12P103930 | 1.508564949 | <a href="https://www.genecards.org/cgi-bin/carddisp.pl?gene=HSP90B1">https://www.genecards.org/cgi-bin/carddisp.pl?gene=HSP90B1</a>           |
| ADRA1B       | Adrenoceptor $\alpha$ 1B                                       | Protein coding | 47 | GC05P159867 | 1.50536871  | <a href="https://www.genecards.org/cgi-bin/carddisp.pl?gene=ADRA1B">https://www.genecards.org/cgi-bin/carddisp.pl?gene=ADRA1B</a>             |
| FBLN5        | Fibulin 5                                                      | Protein coding | 45 | GC14M091869 | 1.505014896 | <a href="https://www.genecards.org/cgi-bin/carddisp.pl?gene=FBLN5">https://www.genecards.org/cgi-bin/carddisp.pl?gene=FBLN5</a>               |
| ENDOG        | Endonuclease G                                                 | Protein coding | 43 | GC09P128818 | 1.505005479 | <a href="https://www.genecards.org/cgi-bin/carddisp.pl?gene=ENDOG">https://www.genecards.org/cgi-bin/carddisp.pl?gene=ENDOG</a>               |
| C1orf167     | Chromosome 1 Open Reading Frame 167                            | Protein coding | 26 | GC01P011761 | 1.504792452 | <a href="https://www.genecards.org/cgi-bin/carddisp.pl?gene=C1orf167">https://www.genecards.org/cgi-bin/carddisp.pl?gene=C1orf167</a>         |
| CNR2         | Cannabinoid Receptor 2                                         | Protein coding | 45 | GC01M023870 | 1.504566908 | <a href="https://www.genecards.org/cgi-bin/carddisp.pl?gene=CNR2">https://www.genecards.org/cgi-bin/carddisp.pl?gene=CNR2</a>                 |
| MANF         | Mesencephalic Astrocyte Derived Neurotrophic Factor            | Protein coding | 38 | GC03P051385 | 1.502204895 | <a href="https://www.genecards.org/cgi-bin/carddisp.pl?gene=MANF">https://www.genecards.org/cgi-bin/carddisp.pl?gene=MANF</a>                 |
| EMD          | Emerin                                                         | Protein coding | 45 | GC0XP154379 | 1.501924396 | <a href="https://www.genecards.org/cgi-bin/carddisp.pl?gene=EMD">https://www.genecards.org/cgi-bin/carddisp.pl?gene=EMD</a>                   |
| NOD1         | Nucleotide Binding Oligomerization Domain Containing 1         | Protein coding | 44 | GC07M030424 | 1.499972701 | <a href="https://www.genecards.org/cgi-bin/carddisp.pl?gene=NOD1">https://www.genecards.org/cgi-bin/carddisp.pl?gene=NOD1</a>                 |
| MIR1275      | MicroRNA 1275                                                  | RNA gene       | 18 | GC06M049244 | 1.499599934 | <a href="https://www.genecards.org/cgi-bin/carddisp.pl?gene=MIR1275">https://www.genecards.org/cgi-bin/carddisp.pl?gene=MIR1275</a>           |
| MIR422A      | MicroRNA 422a                                                  | RNA gene       | 16 | GC15M063870 | 1.499599934 | <a href="https://www.genecards.org/cgi-bin/carddisp.pl?gene=MIR422A">https://www.genecards.org/cgi-bin/carddisp.pl?gene=MIR422A</a>           |
| CYP2R1       | Cytochrome P450 Family 2 Subfamily R Member 1                  | Protein coding | 46 | GC11M014877 | 1.498845696 | <a href="https://www.genecards.org/cgi-bin/carddisp.pl?gene=CYP2R1">https://www.genecards.org/cgi-bin/carddisp.pl?gene=CYP2R1</a>             |
| SORD         | Sorbitol Dehydrogenase                                         | Protein coding | 45 | GC15P045023 | 1.497784972 | <a href="https://www.genecards.org/cgi-bin/carddisp.pl?gene=SORD">https://www.genecards.org/cgi-bin/carddisp.pl?gene=SORD</a>                 |
| DVL1         | Dishevelled Segment Polarity Protein 1                         | Protein coding | 47 | GC01M001335 | 1.492865801 | <a href="https://www.genecards.org/cgi-bin/carddisp.pl?gene=DVL1">https://www.genecards.org/cgi-bin/carddisp.pl?gene=DVL1</a>                 |
| ILF3         | Interleukin Enhancer Binding Factor 3                          | Protein coding | 38 | GC19P010655 | 1.492757082 | <a href="https://www.genecards.org/cgi-bin/carddisp.pl?gene=ILF3">https://www.genecards.org/cgi-bin/carddisp.pl?gene=ILF3</a>                 |
| HSF1         | Heat Shock Transcription Factor 1                              | Protein coding | 44 | GC08P144291 | 1.492130518 | <a href="https://www.genecards.org/cgi-bin/carddisp.pl?gene=HSF1">https://www.genecards.org/cgi-bin/carddisp.pl?gene=HSF1</a>                 |
| SERPINA7     | Serpin Family A Member 7                                       | Protein coding | 39 | GC0XM106032 | 1.49203825  | <a href="https://www.genecards.org/cgi-bin/carddisp.pl?gene=SERPINA7">https://www.genecards.org/cgi-bin/carddisp.pl?gene=SERPINA7</a>         |
| CBL          | Cbl Proto-Oncogene                                             | Protein coding | 50 | GC11P119206 | 1.491443396 | <a href="https://www.genecards.org/cgi-bin/carddisp.pl?gene=CBL">https://www.genecards.org/cgi-bin/carddisp.pl?gene=CBL</a>                   |
| PRKCZ        | Protein Kinase C $\zeta$                                       | Protein coding | 49 | GC01P002050 | 1.491443396 | <a href="https://www.genecards.org/cgi-bin/carddisp.pl?gene=PRKCZ">https://www.genecards.org/cgi-bin/carddisp.pl?gene=PRKCZ</a>               |
| LRPAP1       | LDL Receptor Related Protein Associated Protein 1              | Protein coding | 43 | GC04M003508 | 1.490181565 | <a href="https://www.genecards.org/cgi-bin/carddisp.pl?gene=LRPAP1">https://www.genecards.org/cgi-bin/carddisp.pl?gene=LRPAP1</a>             |
| C1QA         | Complement C1q A Chain                                         | Protein coding | 47 | GC01P022636 | 1.488969445 | <a href="https://www.genecards.org/cgi-bin/carddisp.pl?gene=C1QA">https://www.genecards.org/cgi-bin/carddisp.pl?gene=C1QA</a>                 |
| ANK3         | Ankyrin 3                                                      | Protein coding | 43 | GC10M060026 | 1.487784028 | <a href="https://www.genecards.org/cgi-bin/carddisp.pl?gene=ANK3">https://www.genecards.org/cgi-bin/carddisp.pl?gene=ANK3</a>                 |
| IFNB1        | Interferon $\beta$ 1                                           | Protein coding | 41 | GC09M021077 | 1.48348403  | <a href="https://www.genecards.org/cgi-bin/carddisp.pl?gene=IFNB1">https://www.genecards.org/cgi-bin/carddisp.pl?gene=IFNB1</a>               |
| HRH2         | Histamine Receptor H2                                          | Protein coding | 44 | GC05P175659 | 1.477365732 | <a href="https://www.genecards.org/cgi-bin/carddisp.pl?gene=HRH2">https://www.genecards.org/cgi-bin/carddisp.pl?gene=HRH2</a>                 |
| PTPRD        | Protein Tyrosine Phosphatase Receptor Type D                   | Protein coding | 45 | GC09M008307 | 1.476751924 | <a href="https://www.genecards.org/cgi-bin/carddisp.pl?gene=PTPRD">https://www.genecards.org/cgi-bin/carddisp.pl?gene=PTPRD</a>               |
| HTR3B        | 5-Hydroxytryptamine Receptor 3B                                | Protein coding | 44 | GC11P113905 | 1.474954009 | <a href="https://www.genecards.org/cgi-bin/carddisp.pl?gene=HTR3B">https://www.genecards.org/cgi-bin/carddisp.pl?gene=HTR3B</a>               |
| PICALM       | Phosphatidylinositol Binding Clathrin Assembly Protein         | Protein coding | 43 | GC11M085957 | 1.474954009 | <a href="https://www.genecards.org/cgi-bin/carddisp.pl?gene=PICALM">https://www.genecards.org/cgi-bin/carddisp.pl?gene=PICALM</a>             |
| VPS11        | VPS11 Core Subunit Of CORVET And HOPS Complexes                | Protein coding | 41 | GC11P119067 | 1.474954009 | <a href="https://www.genecards.org/cgi-bin/carddisp.pl?gene=VPS11">https://www.genecards.org/cgi-bin/carddisp.pl?gene=VPS11</a>               |

|                   |                                                                |                |    |             |             |                                                                                                                                                         |
|-------------------|----------------------------------------------------------------|----------------|----|-------------|-------------|---------------------------------------------------------------------------------------------------------------------------------------------------------|
| MOBP              | Myelin Associated Oligodendrocyte Basic Protein                | Protein coding | 36 | GC03P039581 | 1.474954009 | <a href="https://www.genecards.org/cgi-bin/carddisp.pl?gene=MOBP">https://www.genecards.org/cgi-bin/carddisp.pl?gene=MOBP</a>                           |
| MIR616            | MicroRNA 616                                                   | RNA gene       | 16 | GC12M057519 | 1.474439621 | <a href="https://www.genecards.org/cgi-bin/carddisp.pl?gene=MIR616">https://www.genecards.org/cgi-bin/carddisp.pl?gene=MIR616</a>                       |
| PSMD9             | Proteasome 26S Subunit, Non-ATPase 9                           | Protein coding | 43 | GC12P123877 | 1.474322796 | <a href="https://www.genecards.org/cgi-bin/carddisp.pl?gene=PSMD9">https://www.genecards.org/cgi-bin/carddisp.pl?gene=PSMD9</a>                         |
| MET               | MET Proto-Oncogene, Receptor Tyrosine Kinase                   | Protein coding | 53 | GC07P116672 | 1.472570658 | <a href="https://www.genecards.org/cgi-bin/carddisp.pl?gene=MET">https://www.genecards.org/cgi-bin/carddisp.pl?gene=MET</a>                             |
| KCNJ1             | Potassium Inwardly Rectifying Channel Subfamily J Member 1     | Protein coding | 48 | GC11M128741 | 1.470752716 | <a href="https://www.genecards.org/cgi-bin/carddisp.pl?gene=KCNJ1">https://www.genecards.org/cgi-bin/carddisp.pl?gene=KCNJ1</a>                         |
| CST2              | Cystatin SA                                                    | Protein coding | 36 | GC20M023805 | 1.469598651 | <a href="https://www.genecards.org/cgi-bin/carddisp.pl?gene=CST2">https://www.genecards.org/cgi-bin/carddisp.pl?gene=CST2</a>                           |
| SIRT3             | Sirtuin 3                                                      | Protein coding | 47 | GC11M000215 | 1.469598413 | <a href="https://www.genecards.org/cgi-bin/carddisp.pl?gene=SIRT3">https://www.genecards.org/cgi-bin/carddisp.pl?gene=SIRT3</a>                         |
| DYNC2H1           | Dynein Cytoplasmic 2 Heavy Chain 1                             | Protein coding | 38 | GC11P103109 | 1.468119979 | <a href="https://www.genecards.org/cgi-bin/carddisp.pl?gene=DYNC2H1">https://www.genecards.org/cgi-bin/carddisp.pl?gene=DYNC2H1</a>                     |
| SUN2              | Sad1 And UNC84 Domain Containing 2                             | Protein coding | 38 | GC22M049698 | 1.466243982 | <a href="https://www.genecards.org/cgi-bin/carddisp.pl?gene=SUN2">https://www.genecards.org/cgi-bin/carddisp.pl?gene=SUN2</a>                           |
| MAP2K4            | Mitogen-Activated Protein Kinase Kinase 4                      | Protein coding | 47 | GC17P012020 | 1.464294195 | <a href="https://www.genecards.org/cgi-bin/carddisp.pl?gene=MAP2K4">https://www.genecards.org/cgi-bin/carddisp.pl?gene=MAP2K4</a>                       |
| IL20RB            | Interleukin 20 Receptor Subunit $\beta$                        | Protein coding | 38 | GC03P136946 | 1.464294195 | <a href="https://www.genecards.org/cgi-bin/carddisp.pl?gene=IL20RB">https://www.genecards.org/cgi-bin/carddisp.pl?gene=IL20RB</a>                       |
| ALCAM             | Activated Leukocyte Cell Adhesion Molecule                     | Protein coding | 43 | GC03P105366 | 1.463283658 | <a href="https://www.genecards.org/cgi-bin/carddisp.pl?gene=ALCAM">https://www.genecards.org/cgi-bin/carddisp.pl?gene=ALCAM</a>                         |
| ATF6              | Activating Transcription Factor 6                              | Protein coding | 47 | GC01P161766 | 1.462877512 | <a href="https://www.genecards.org/cgi-bin/carddisp.pl?gene=ATF6">https://www.genecards.org/cgi-bin/carddisp.pl?gene=ATF6</a>                           |
| NPC2              | NPC Intracellular Cholesterol Transporter 2                    | Protein coding | 41 | GC14M074476 | 1.462090611 | <a href="https://www.genecards.org/cgi-bin/carddisp.pl?gene=NPC2">https://www.genecards.org/cgi-bin/carddisp.pl?gene=NPC2</a>                           |
| HADH              | Hydroxyacyl-CoA Dehydrogenase                                  | Protein coding | 46 | GC04P107989 | 1.461119533 | <a href="https://www.genecards.org/cgi-bin/carddisp.pl?gene=HADH">https://www.genecards.org/cgi-bin/carddisp.pl?gene=HADH</a>                           |
| LACTB             | Lactamase $\beta$                                              | Protein coding | 36 | GC15P079621 | 1.458862662 | <a href="https://www.genecards.org/cgi-bin/carddisp.pl?gene=LACTB">https://www.genecards.org/cgi-bin/carddisp.pl?gene=LACTB</a>                         |
| TYK2              | Tyrosine Kinase 2                                              | Protein coding | 52 | GC19M010350 | 1.458078861 | <a href="https://www.genecards.org/cgi-bin/carddisp.pl?gene=TYK2">https://www.genecards.org/cgi-bin/carddisp.pl?gene=TYK2</a>                           |
| S100P             | S100 Calcium Binding Protein P                                 | Protein coding | 39 | GC04P006700 | 1.457403421 | <a href="https://www.genecards.org/cgi-bin/carddisp.pl?gene=S100P">https://www.genecards.org/cgi-bin/carddisp.pl?gene=S100P</a>                         |
| SPARCL1           | SPARC Like 1                                                   | Protein coding | 37 | GC04M087473 | 1.457403421 | <a href="https://www.genecards.org/cgi-bin/carddisp.pl?gene=SPARCL1">https://www.genecards.org/cgi-bin/carddisp.pl?gene=SPARCL1</a>                     |
| TIPARP            | TCDD Inducible Poly(ADP-Ribose) Polymerase                     | Protein coding | 34 | GC03P156673 | 1.457403421 | <a href="https://www.genecards.org/cgi-bin/carddisp.pl?gene=TIPARP">https://www.genecards.org/cgi-bin/carddisp.pl?gene=TIPARP</a>                       |
| PRPF8             | Pre-mRNA Processing Factor 8                                   | Protein coding | 41 | GC17M001650 | 1.456801891 | <a href="https://www.genecards.org/cgi-bin/carddisp.pl?gene=PRPF8">https://www.genecards.org/cgi-bin/carddisp.pl?gene=PRPF8</a>                         |
| CD46              | CD46 Molecule                                                  | Protein coding | 45 | GC01P207752 | 1.45359683  | <a href="https://www.genecards.org/cgi-bin/carddisp.pl?gene=CD46">https://www.genecards.org/cgi-bin/carddisp.pl?gene=CD46</a>                           |
| TMEM132D          | Transmembrane Protein 132D                                     | Protein coding | 37 | GC12M129071 | 1.45349288  | <a href="https://www.genecards.org/cgi-bin/carddisp.pl?gene=TMEM132D">https://www.genecards.org/cgi-bin/carddisp.pl?gene=TMEM132D</a>                   |
| TCF12             | Transcription Factor 12                                        | Protein coding | 47 | GC15P056918 | 1.452520847 | <a href="https://www.genecards.org/cgi-bin/carddisp.pl?gene=TCF12">https://www.genecards.org/cgi-bin/carddisp.pl?gene=TCF12</a>                         |
| SLC44A2           | Solute Carrier Family 44 Member 2                              | Protein coding | 41 | GC19P010602 | 1.452520847 | <a href="https://www.genecards.org/cgi-bin/carddisp.pl?gene=SLC44A2">https://www.genecards.org/cgi-bin/carddisp.pl?gene=SLC44A2</a>                     |
| GRM2              | Glutamate Metabotropic Receptor 2                              | Protein coding | 45 | GC03P051707 | 1.446584225 | <a href="https://www.genecards.org/cgi-bin/carddisp.pl?gene=GRM2">https://www.genecards.org/cgi-bin/carddisp.pl?gene=GRM2</a>                           |
| MIR340            | MicroRNA 340                                                   | RNA gene       | 19 | GC05M180015 | 1.445489645 | <a href="https://www.genecards.org/cgi-bin/carddisp.pl?gene=MIR340">https://www.genecards.org/cgi-bin/carddisp.pl?gene=MIR340</a>                       |
| PHF1              | PHD Finger Protein 1                                           | Protein coding | 41 | GC06P058388 | 1.44329524  | <a href="https://www.genecards.org/cgi-bin/carddisp.pl?gene=PHF1">https://www.genecards.org/cgi-bin/carddisp.pl?gene=PHF1</a>                           |
| SCUBE1            | Signal Peptide, CUB Domain And EGF Like Domain Containing 1    | Protein coding | 36 | GC22M043197 | 1.442792177 | <a href="https://www.genecards.org/cgi-bin/carddisp.pl?gene=SCUBE1">https://www.genecards.org/cgi-bin/carddisp.pl?gene=SCUBE1</a>                       |
| RPL7A             | Ribosomal Protein L7a                                          | Protein coding | 42 | GC09P133348 | 1.440408945 | <a href="https://www.genecards.org/cgi-bin/carddisp.pl?gene=RPL7A">https://www.genecards.org/cgi-bin/carddisp.pl?gene=RPL7A</a>                         |
| SH3PXD2A          | SH3 And PX Domains 2A                                          | Protein coding | 38 | GC10M103594 | 1.440408945 | <a href="https://www.genecards.org/cgi-bin/carddisp.pl?gene=SH3PXD2A">https://www.genecards.org/cgi-bin/carddisp.pl?gene=SH3PXD2A</a>                   |
| SURF4             | Surfeit 4                                                      | Protein coding | 38 | GC09M133361 | 1.440408945 | <a href="https://www.genecards.org/cgi-bin/carddisp.pl?gene=SURF4">https://www.genecards.org/cgi-bin/carddisp.pl?gene=SURF4</a>                         |
| CASZ1             | Castor zinc finger 1                                           | Protein coding | 37 | GC01M010642 | 1.440408945 | <a href="https://www.genecards.org/cgi-bin/carddisp.pl?gene=CASZ1">https://www.genecards.org/cgi-bin/carddisp.pl?gene=CASZ1</a>                         |
| PMFBP1            | Polyamine Modulated Factor 1 Binding Protein 1                 | Protein coding | 37 | GC16M072112 | 1.440408945 | <a href="https://www.genecards.org/cgi-bin/carddisp.pl?gene=PMFBP1">https://www.genecards.org/cgi-bin/carddisp.pl?gene=PMFBP1</a>                       |
| SURF2             | Surfeit 2                                                      | Protein coding | 36 | GC09P133620 | 1.440408945 | <a href="https://www.genecards.org/cgi-bin/carddisp.pl?gene=SURF2">https://www.genecards.org/cgi-bin/carddisp.pl?gene=SURF2</a>                         |
| TTBK1             | Tau Tubulin Kinase 1                                           | Protein coding | 36 | GC06P043243 | 1.440408945 | <a href="https://www.genecards.org/cgi-bin/carddisp.pl?gene=TTBK1">https://www.genecards.org/cgi-bin/carddisp.pl?gene=TTBK1</a>                         |
| C1orf127          | Chromosome 1 Open Reading Frame 127                            | Protein coding | 34 | GC01M010946 | 1.440408945 | <a href="https://www.genecards.org/cgi-bin/carddisp.pl?gene=C1orf127">https://www.genecards.org/cgi-bin/carddisp.pl?gene=C1orf127</a>                   |
| C16orf95          | Chromosome 16 Open Reading Frame 95                            | Protein coding | 25 | GC16M087119 | 1.440408945 | <a href="https://www.genecards.org/cgi-bin/carddisp.pl?gene=C16orf95">https://www.genecards.org/cgi-bin/carddisp.pl?gene=C16orf95</a>                   |
| SNORD24           | Small Nucleolar RNA, C/D Box 24                                | RNA gene       | 15 | GC09P133349 | 1.440408945 | <a href="https://www.genecards.org/cgi-bin/carddisp.pl?gene=SNORD24">https://www.genecards.org/cgi-bin/carddisp.pl?gene=SNORD24</a>                     |
| SNORD36A          | Small Nucleolar RNA, C/D Box 36A                               | RNA gene       | 14 | GC09P133618 | 1.440408945 | <a href="https://www.genecards.org/cgi-bin/carddisp.pl?gene=SNORD36A">https://www.genecards.org/cgi-bin/carddisp.pl?gene=SNORD36A</a>                   |
| SNORD36B          | Small Nucleolar RNA, C/D Box 36B                               | RNA gene       | 14 | GC09P133617 | 1.440408945 | <a href="https://www.genecards.org/cgi-bin/carddisp.pl?gene=SNORD36B">https://www.genecards.org/cgi-bin/carddisp.pl?gene=SNORD36B</a>                   |
| SNORD36C          | Small Nucleolar RNA, C/D Box 36C                               | RNA gene       | 14 | GC09P133619 | 1.440408945 | <a href="https://www.genecards.org/cgi-bin/carddisp.pl?gene=SNORD36C">https://www.genecards.org/cgi-bin/carddisp.pl?gene=SNORD36C</a>                   |
| F11-AS1           | F11 Antisense RNA 1                                            | RNA gene       | 13 | GC04M186286 | 1.440408945 | <a href="https://www.genecards.org/cgi-bin/carddisp.pl?gene=F11-AS1">https://www.genecards.org/cgi-bin/carddisp.pl?gene=F11-AS1</a>                     |
| LOC100505841      | Zinc Finger Protein 474-Like                                   | Protein coding | 13 | GC05P122130 | 1.440408945 | <a href="https://www.genecards.org/cgi-bin/carddisp.pl?gene=LOC100505841">https://www.genecards.org/cgi-bin/carddisp.pl?gene=LOC100505841</a>           |
| LINC01304         | Long Intergenic Non-Protein Coding RNA 1304                    | RNA gene       | 10 | GC02M003957 | 1.440408945 | <a href="https://www.genecards.org/cgi-bin/carddisp.pl?gene=LINC01304">https://www.genecards.org/cgi-bin/carddisp.pl?gene=LINC01304</a>                 |
| LINC01438         | Long Intergenic Non-Protein Coding RNA 1438                    | RNA gene       | 8  | GC04P110794 | 1.440408945 | <a href="https://www.genecards.org/cgi-bin/carddisp.pl?gene=LINC01438">https://www.genecards.org/cgi-bin/carddisp.pl?gene=LINC01438</a>                 |
| RPL21P81          | Ribosomal Protein L21 Pseudogene 81                            | Pseudogene     | 6  | GC09P133338 | 1.440408945 | <a href="https://www.genecards.org/cgi-bin/carddisp.pl?gene=RPL21P81">https://www.genecards.org/cgi-bin/carddisp.pl?gene=RPL21P81</a>                   |
| ENSG00000201451   | Y RNA                                                          | RNA gene       | 6  | GC09M133339 | 1.440408945 | <a href="https://www.genecards.org/cgi-bin/carddisp.pl?gene=ENSG00000201451">https://www.genecards.org/cgi-bin/carddisp.pl?gene=ENSG00000201451</a>     |
| RNU6-144P         | RNA, U6 Small Nuclear 144, Pseudogene                          | Pseudogene     | 5  | GC08P137105 | 1.440408945 | <a href="https://www.genecards.org/cgi-bin/carddisp.pl?gene=RNU6-144P">https://www.genecards.org/cgi-bin/carddisp.pl?gene=RNU6-144P</a>                 |
| ENSG00000277653   |                                                                | RNA gene       | 5  | GC09P022117 | 1.440408945 | <a href="https://www.genecards.org/cgi-bin/carddisp.pl?gene=ENSG00000277653">https://www.genecards.org/cgi-bin/carddisp.pl?gene=ENSG00000277653</a>     |
| lnc-TWIST1-1      |                                                                | RNA gene       | 5  | GC07M018967 | 1.440408945 | <a href="https://www.genecards.org/cgi-bin/carddisp.pl?gene=lnc-TWIST1-1">https://www.genecards.org/cgi-bin/carddisp.pl?gene=lnc-TWIST1-1</a>           |
| ZYXP1             | Zyxin Pseudogene 1                                             | Pseudogene     | 4  | GC08M137425 | 1.440408945 | <a href="https://www.genecards.org/cgi-bin/carddisp.pl?gene=ZYXP1">https://www.genecards.org/cgi-bin/carddisp.pl?gene=ZYXP1</a>                         |
| HSALNG0000800     |                                                                | RNA gene       | 4  | GC01P010729 | 1.440408945 | <a href="https://www.genecards.org/cgi-bin/carddisp.pl?gene=HSALNG0000800">https://www.genecards.org/cgi-bin/carddisp.pl?gene=HSALNG0000800</a>         |
| lnc-JPH3-1        |                                                                | RNA gene       | 4  | GC16P087582 | 1.440408945 | <a href="https://www.genecards.org/cgi-bin/carddisp.pl?gene=lnc-JPH3-1">https://www.genecards.org/cgi-bin/carddisp.pl?gene=lnc-JPH3-1</a>               |
| lnc-JPH3-6        |                                                                | RNA gene       | 4  | GC16P087539 | 1.440408945 | <a href="https://www.genecards.org/cgi-bin/carddisp.pl?gene=lnc-JPH3-6">https://www.genecards.org/cgi-bin/carddisp.pl?gene=lnc-JPH3-6</a>               |
| HSALNG0070392-001 |                                                                | RNA gene       | 4  | GC09M021933 | 1.440408945 | <a href="https://www.genecards.org/cgi-bin/carddisp.pl?gene=HSALNG0070392-001">https://www.genecards.org/cgi-bin/carddisp.pl?gene=HSALNG0070392-001</a> |
| RF00017-7527      |                                                                | RNA gene       | 4  | GC09P133312 | 1.440408945 | <a href="https://www.genecards.org/cgi-bin/carddisp.pl?gene=RF00017-7527">https://www.genecards.org/cgi-bin/carddisp.pl?gene=RF00017-7527</a>           |
| RF00951-004       |                                                                | RNA gene       | 4  | GC01M010753 | 1.440408945 | <a href="https://www.genecards.org/cgi-bin/carddisp.pl?gene=RF00951-004">https://www.genecards.org/cgi-bin/carddisp.pl?gene=RF00951-004</a>             |
| MN297386          |                                                                | RNA gene       | 2  | GC16M073042 | 1.440408945 | <a href="https://www.genecards.org/cgi-bin/carddisp.pl?gene=MN297386">https://www.genecards.org/cgi-bin/carddisp.pl?gene=MN297386</a>                   |
| HSALNG0050175     |                                                                | RNA gene       | 2  | GC06P059147 | 1.440408945 | <a href="https://www.genecards.org/cgi-bin/carddisp.pl?gene=HSALNG0050175">https://www.genecards.org/cgi-bin/carddisp.pl?gene=HSALNG0050175</a>         |
| piR-58308-245     |                                                                | RNA gene       | 2  | GC04P110762 | 1.440408945 | <a href="https://www.genecards.org/cgi-bin/carddisp.pl?gene=piR-58308-245">https://www.genecards.org/cgi-bin/carddisp.pl?gene=piR-58308-245</a>         |
| piR-41525-616     |                                                                | RNA gene       | 2  | GC07P019005 | 1.440408945 | <a href="https://www.genecards.org/cgi-bin/carddisp.pl?gene=piR-41525-616">https://www.genecards.org/cgi-bin/carddisp.pl?gene=piR-41525-616</a>         |
| piR-59149         |                                                                | RNA gene       | 2  | GC16M073025 | 1.440408945 | <a href="https://www.genecards.org/cgi-bin/carddisp.pl?gene=piR-59149">https://www.genecards.org/cgi-bin/carddisp.pl?gene=piR-59149</a>                 |
| piR-31534-613     |                                                                | RNA gene       | 2  | GC07M019028 | 1.440408945 | <a href="https://www.genecards.org/cgi-bin/carddisp.pl?gene=piR-31534-613">https://www.genecards.org/cgi-bin/carddisp.pl?gene=piR-31534-613</a>         |
| MAP1B             | Microtubule Associated Protein 1B                              | Protein coding | 44 | GC05P072107 | 1.439234734 | <a href="https://www.genecards.org/cgi-bin/carddisp.pl?gene=MAP1B">https://www.genecards.org/cgi-bin/carddisp.pl?gene=MAP1B</a>                         |
| HVCN1             | Hydrogen Voltage Gated Channel 1                               | Protein coding | 38 | GC12M110627 | 1.438877583 | <a href="https://www.genecards.org/cgi-bin/carddisp.pl?gene=HVCN1">https://www.genecards.org/cgi-bin/carddisp.pl?gene=HVCN1</a>                         |
| SYNE2             | Spectrin Repeat Containing Nuclear Envelope Protein 2          | Protein coding | 39 | GC14P063761 | 1.434756994 | <a href="https://www.genecards.org/cgi-bin/carddisp.pl?gene=SYNE2">https://www.genecards.org/cgi-bin/carddisp.pl?gene=SYNE2</a>                         |
| CRAT              | Carnitine O-Acetyltransferase                                  | Protein coding | 45 | GC09M129094 | 1.434100866 | <a href="https://www.genecards.org/cgi-bin/carddisp.pl?gene=CRAT">https://www.genecards.org/cgi-bin/carddisp.pl?gene=CRAT</a>                           |
| GATM              | Glycine Amidinotransferase                                     | Protein coding | 45 | GC15M045361 | 1.430175781 | <a href="https://www.genecards.org/cgi-bin/carddisp.pl?gene=GATM">https://www.genecards.org/cgi-bin/carddisp.pl?gene=GATM</a>                           |
| ANKS1A            | Ankyrin Repeat And Sterile $\alpha$ Motif Domain Containing 1A | Protein coding | 36 | GC06P058430 | 1.42937994  | <a href="https://www.genecards.org/cgi-bin/carddisp.pl?gene=ANKS1A">https://www.genecards.org/cgi-bin/carddisp.pl?gene=ANKS1A</a>                       |
| DEFB1             | Defensin $\beta$ 1                                             | Protein coding | 39 | GC08M006870 | 1.428453445 | <a href="https://www.genecards.org/cgi-bin/carddisp.pl?gene=DEFB1">https://www.genecards.org/cgi-bin/carddisp.pl?gene=DEFB1</a>                         |
| NPL               | N-Acetylneuraminate Pyruvate Lyase                             | Protein coding | 39 | GC01P182758 | 1.428453445 | <a href="https://www.genecards.org/cgi-bin/carddisp.pl?gene=NPL">https://www.genecards.org/cgi-bin/carddisp.pl?gene=NPL</a>                             |
| RNASE2            | Ribonuclease A Family Member 2                                 | Protein coding | 38 | GC14P022329 | 1.428453445 | <a href="https://www.genecards.org/cgi-bin/carddisp.pl?gene=RNASE2">https://www.genecards.org/cgi-bin/carddisp.pl?gene=RNASE2</a>                       |
| CILP2             | Cartilage Intermediate Layer Protein 2                         | Protein coding | 35 | GC19P019538 | 1.428453445 | <a href="https://www.genecards.org/cgi-bin/carddisp.pl?gene=CILP2">https://www.genecards.org/cgi-bin/carddisp.pl?gene=CILP2</a>                         |
| MAFB              | MAF BZIP Transcription Factor B                                | Protein coding | 43 | GC20M040685 | 1.425207138 | <a href="https://www.genecards.org/cgi-bin/carddisp.pl?gene=MAFB">https://www.genecards.org/cgi-bin/carddisp.pl?gene=MAFB</a>                           |

|             |                                                                  |                |    |             |             |                                                                                                                                             |
|-------------|------------------------------------------------------------------|----------------|----|-------------|-------------|---------------------------------------------------------------------------------------------------------------------------------------------|
| PTGER4      | Prostaglandin E Receptor 4                                       | Protein coding | 46 | GC05P040679 | 1.424358845 | <a href="https://www.genecards.org/cgi-bin/carddisp.pl?gene=PTGER4">https://www.genecards.org/cgi-bin/carddisp.pl?gene=PTGER4</a>           |
| IL10RA      | Interleukin 10 Receptor Subunit $\alpha$                         | Protein coding | 45 | GC11P117987 | 1.423651576 | <a href="https://www.genecards.org/cgi-bin/carddisp.pl?gene=IL10RA">https://www.genecards.org/cgi-bin/carddisp.pl?gene=IL10RA</a>           |
| HSPB6       | Heat Shock Protein Family B (Small) Member 6                     | Protein coding | 38 | GC19M048375 | 1.4234308   | <a href="https://www.genecards.org/cgi-bin/carddisp.pl?gene=HSPB6">https://www.genecards.org/cgi-bin/carddisp.pl?gene=HSPB6</a>             |
| RGS2        | Regulator Of G Protein Signaling 2                               | Protein coding | 42 | GC01P192809 | 1.422876358 | <a href="https://www.genecards.org/cgi-bin/carddisp.pl?gene=RGS2">https://www.genecards.org/cgi-bin/carddisp.pl?gene=RGS2</a>               |
| CHRNA3      | Cholinergic Receptor Nicotinic $\alpha$ 3 Subunit                | Protein coding | 44 | GC15M078594 | 1.422593355 | <a href="https://www.genecards.org/cgi-bin/carddisp.pl?gene=CHRNA3">https://www.genecards.org/cgi-bin/carddisp.pl?gene=CHRNA3</a>           |
| MIR22       | MicroRNA 22                                                      | RNA gene       | 20 | GC17M001713 | 1.420866013 | <a href="https://www.genecards.org/cgi-bin/carddisp.pl?gene=MIR22">https://www.genecards.org/cgi-bin/carddisp.pl?gene=MIR22</a>             |
| MYL2        | Myosin Light Chain 2                                             | Protein coding | 49 | GC12M110910 | 1.419019341 | <a href="https://www.genecards.org/cgi-bin/carddisp.pl?gene=MYL2">https://www.genecards.org/cgi-bin/carddisp.pl?gene=MYL2</a>               |
| KCNJ16      | Potassium Inwardly Rectifying Channel Subfamily J Member 16      | Protein coding | 39 | GC17P070053 | 1.418386102 | <a href="https://www.genecards.org/cgi-bin/carddisp.pl?gene=KCNJ16">https://www.genecards.org/cgi-bin/carddisp.pl?gene=KCNJ16</a>           |
| XYLB        | Xylulokinase                                                     | Protein coding | 39 | GC03P038363 | 1.418386102 | <a href="https://www.genecards.org/cgi-bin/carddisp.pl?gene=XYLB">https://www.genecards.org/cgi-bin/carddisp.pl?gene=XYLB</a>               |
| MATN3       | Matrilin 3                                                       | Protein coding | 42 | GC02M019992 | 1.418205023 | <a href="https://www.genecards.org/cgi-bin/carddisp.pl?gene=MATN3">https://www.genecards.org/cgi-bin/carddisp.pl?gene=MATN3</a>             |
| MIR24-2     | MicroRNA 24-2                                                    | RNA gene       | 19 | GC19M014148 | 1.41344595  | <a href="https://www.genecards.org/cgi-bin/carddisp.pl?gene=MIR24-2">https://www.genecards.org/cgi-bin/carddisp.pl?gene=MIR24-2</a>         |
| CBX5        | Chromobox 5                                                      | Protein coding | 44 | GC12M054230 | 1.413188934 | <a href="https://www.genecards.org/cgi-bin/carddisp.pl?gene=CBX5">https://www.genecards.org/cgi-bin/carddisp.pl?gene=CBX5</a>               |
| LTPB4       | Latent Transforming Growth Factor $\beta$ Binding Protein 4      | Protein coding | 40 | GC19P040592 | 1.413188934 | <a href="https://www.genecards.org/cgi-bin/carddisp.pl?gene=LTPB4">https://www.genecards.org/cgi-bin/carddisp.pl?gene=LTPB4</a>             |
| PRKDC       | Protein Kinase, DNA-Activated, Catalytic Subunit                 | Protein coding | 50 | GC08M047773 | 1.410839796 | <a href="https://www.genecards.org/cgi-bin/carddisp.pl?gene=PRKDC">https://www.genecards.org/cgi-bin/carddisp.pl?gene=PRKDC</a>             |
| PRPS1       | Phosphoribosyl Pyrophosphate Synthetase 1                        | Protein coding | 47 | GC0XP107628 | 1.410839796 | <a href="https://www.genecards.org/cgi-bin/carddisp.pl?gene=PRPS1">https://www.genecards.org/cgi-bin/carddisp.pl?gene=PRPS1</a>             |
| TP53BP1     | Tumor Protein P53 Binding Protein 1                              | Protein coding | 45 | GC15M043403 | 1.410839796 | <a href="https://www.genecards.org/cgi-bin/carddisp.pl?gene=TP53BP1">https://www.genecards.org/cgi-bin/carddisp.pl?gene=TP53BP1</a>         |
| NAGA        | $\alpha$ -N-Acetylgalactosaminidase                              | Protein coding | 43 | GC22M042058 | 1.410839796 | <a href="https://www.genecards.org/cgi-bin/carddisp.pl?gene=NAGA">https://www.genecards.org/cgi-bin/carddisp.pl?gene=NAGA</a>               |
| BANF1       | BAF Nuclear Assembly Factor 1                                    | Protein coding | 42 | GC11P066002 | 1.410839796 | <a href="https://www.genecards.org/cgi-bin/carddisp.pl?gene=BANF1">https://www.genecards.org/cgi-bin/carddisp.pl?gene=BANF1</a>             |
| MIR124-2    | MicroRNA 124-2                                                   | RNA gene       | 19 | GC08P064379 | 1.409927607 | <a href="https://www.genecards.org/cgi-bin/carddisp.pl?gene=MIR124-2">https://www.genecards.org/cgi-bin/carddisp.pl?gene=MIR124-2</a>       |
| FUT8        | Fucosyltransferase 8                                             | Protein coding | 44 | GC14P065411 | 1.406030059 | <a href="https://www.genecards.org/cgi-bin/carddisp.pl?gene=FUT8">https://www.genecards.org/cgi-bin/carddisp.pl?gene=FUT8</a>               |
| SLC37A4     | Solute Carrier Family 37 Member 4                                | Protein coding | 44 | GC11M119024 | 1.406030059 | <a href="https://www.genecards.org/cgi-bin/carddisp.pl?gene=SLC37A4">https://www.genecards.org/cgi-bin/carddisp.pl?gene=SLC37A4</a>         |
| VPS33B      | VPS33B Late Endosome And Lysosome Associated                     | Protein coding | 41 | GC15M090998 | 1.406030059 | <a href="https://www.genecards.org/cgi-bin/carddisp.pl?gene=VPS33B">https://www.genecards.org/cgi-bin/carddisp.pl?gene=VPS33B</a>           |
| GALNT17     | Polypeptide N-Acetylgalactosaminyltransferase 17                 | Protein coding | 31 | GC07P071133 | 1.406030059 | <a href="https://www.genecards.org/cgi-bin/carddisp.pl?gene=GALNT17">https://www.genecards.org/cgi-bin/carddisp.pl?gene=GALNT17</a>         |
| DENND2B     | DENN Domain Containing 2B                                        | Protein coding | 29 | GC11M008695 | 1.406030059 | <a href="https://www.genecards.org/cgi-bin/carddisp.pl?gene=DENND2B">https://www.genecards.org/cgi-bin/carddisp.pl?gene=DENND2B</a>         |
| REST        | RE1 Silencing Transcription Factor                               | Protein coding | 44 | GC04P056907 | 1.403827429 | <a href="https://www.genecards.org/cgi-bin/carddisp.pl?gene=REST">https://www.genecards.org/cgi-bin/carddisp.pl?gene=REST</a>               |
| EDN2        | Endothelin 2                                                     | Protein coding | 40 | GC01M041478 | 1.403613567 | <a href="https://www.genecards.org/cgi-bin/carddisp.pl?gene=EDN2">https://www.genecards.org/cgi-bin/carddisp.pl?gene=EDN2</a>               |
| SMG6        | SMG6 Nonsense Mediated mRNA Decay Factor                         | Protein coding | 40 | GC17M002059 | 1.401790619 | <a href="https://www.genecards.org/cgi-bin/carddisp.pl?gene=SMG6">https://www.genecards.org/cgi-bin/carddisp.pl?gene=SMG6</a>               |
| DNM1P37     | Dynamin 1 Pseudogene 37                                          | Pseudogene     | 4  | GC15M078784 | 1.401790619 | <a href="https://www.genecards.org/cgi-bin/carddisp.pl?gene=DNM1P37">https://www.genecards.org/cgi-bin/carddisp.pl?gene=DNM1P37</a>         |
| RPTOR       | Regulatory Associated Protein Of MTOR Complex 1                  | Protein coding | 44 | GC17P080544 | 1.400358915 | <a href="https://www.genecards.org/cgi-bin/carddisp.pl?gene=RPTOR">https://www.genecards.org/cgi-bin/carddisp.pl?gene=RPTOR</a>             |
| TRAPPC4     | Trafficking Protein Particle Complex Subunit 4                   | Protein coding | 40 | GC11P119018 | 1.400358915 | <a href="https://www.genecards.org/cgi-bin/carddisp.pl?gene=TRAPPC4">https://www.genecards.org/cgi-bin/carddisp.pl?gene=TRAPPC4</a>         |
| RAB8A       | RAB8A, Member RAS Oncogene Family                                | Protein coding | 40 | GC19P016111 | 1.400358915 | <a href="https://www.genecards.org/cgi-bin/carddisp.pl?gene=RAB8A">https://www.genecards.org/cgi-bin/carddisp.pl?gene=RAB8A</a>             |
| SBF2        | SET Binding Factor 2                                             | Protein coding | 39 | GC11M009790 | 1.400358915 | <a href="https://www.genecards.org/cgi-bin/carddisp.pl?gene=SBF2">https://www.genecards.org/cgi-bin/carddisp.pl?gene=SBF2</a>               |
| FBXO38      | F-Box Protein 38                                                 | Protein coding | 38 | GC05P148383 | 1.400358915 | <a href="https://www.genecards.org/cgi-bin/carddisp.pl?gene=FBXO38">https://www.genecards.org/cgi-bin/carddisp.pl?gene=FBXO38</a>           |
| TECRL       | Trans-2,3-Enoyl-CoA Reductase Like                               | Protein coding | 37 | GC04M064275 | 1.400358915 | <a href="https://www.genecards.org/cgi-bin/carddisp.pl?gene=TECRL">https://www.genecards.org/cgi-bin/carddisp.pl?gene=TECRL</a>             |
| SSPN        | Sarcospan                                                        | Protein coding | 35 | GC12P026118 | 1.400358915 | <a href="https://www.genecards.org/cgi-bin/carddisp.pl?gene=SSPN">https://www.genecards.org/cgi-bin/carddisp.pl?gene=SSPN</a>               |
| CXCL11      | C-X-C Motif Chemokine Ligand 11                                  | Protein coding | 41 | GC04M076033 | 1.397946    | <a href="https://www.genecards.org/cgi-bin/carddisp.pl?gene=CXCL11">https://www.genecards.org/cgi-bin/carddisp.pl?gene=CXCL11</a>           |
| ACTA1       | Actin $\alpha$ 1, Skeletal Muscle                                | Protein coding | 47 | GC01M229431 | 1.397641897 | <a href="https://www.genecards.org/cgi-bin/carddisp.pl?gene=ACTA1">https://www.genecards.org/cgi-bin/carddisp.pl?gene=ACTA1</a>             |
| PANX1       | Pannexin 1                                                       | Protein coding | 43 | GC11P094128 | 1.395937562 | <a href="https://www.genecards.org/cgi-bin/carddisp.pl?gene=PANX1">https://www.genecards.org/cgi-bin/carddisp.pl?gene=PANX1</a>             |
| NPR2        | Natriuretic Peptide Receptor 2                                   | Protein coding | 48 | GC09P035782 | 1.395287871 | <a href="https://www.genecards.org/cgi-bin/carddisp.pl?gene=NPR2">https://www.genecards.org/cgi-bin/carddisp.pl?gene=NPR2</a>               |
| BRD4        | Bromodomain Containing 4                                         | Protein coding | 47 | GC19M015236 | 1.394229174 | <a href="https://www.genecards.org/cgi-bin/carddisp.pl?gene=BRD4">https://www.genecards.org/cgi-bin/carddisp.pl?gene=BRD4</a>               |
| TRA2B       | Transformer 2 $\beta$ Homolog                                    | Protein coding | 39 | GC03M185914 | 1.394229174 | <a href="https://www.genecards.org/cgi-bin/carddisp.pl?gene=TRA2B">https://www.genecards.org/cgi-bin/carddisp.pl?gene=TRA2B</a>             |
| ADGRL3      | Adhesion G Protein-Coupled Receptor L3                           | Protein coding | 34 | GC04P061201 | 1.394229174 | <a href="https://www.genecards.org/cgi-bin/carddisp.pl?gene=ADGRL3">https://www.genecards.org/cgi-bin/carddisp.pl?gene=ADGRL3</a>           |
| TRPM2       | Transient Receptor Potential Cation Channel Subfamily M Member 2 | Protein coding | 43 | GC21P044350 | 1.393633723 | <a href="https://www.genecards.org/cgi-bin/carddisp.pl?gene=TRPM2">https://www.genecards.org/cgi-bin/carddisp.pl?gene=TRPM2</a>             |
| CSRP3       | Cysteine And Glycine Rich Protein 3                              | Protein coding | 42 | GC11M019160 | 1.392816663 | <a href="https://www.genecards.org/cgi-bin/carddisp.pl?gene=CSRP3">https://www.genecards.org/cgi-bin/carddisp.pl?gene=CSRP3</a>             |
| MIR191      | MicroRNA 191                                                     | RNA gene       | 21 | GC03M049511 | 1.392399549 | <a href="https://www.genecards.org/cgi-bin/carddisp.pl?gene=MIR191">https://www.genecards.org/cgi-bin/carddisp.pl?gene=MIR191</a>           |
| GLDC        | Glycine Decarboxylase                                            | Protein coding | 48 | GC09M006522 | 1.390537739 | <a href="https://www.genecards.org/cgi-bin/carddisp.pl?gene=GLDC">https://www.genecards.org/cgi-bin/carddisp.pl?gene=GLDC</a>               |
| SGCA        | Sarcoglycan $\alpha$                                             | Protein coding | 42 | GC17P050164 | 1.390537739 | <a href="https://www.genecards.org/cgi-bin/carddisp.pl?gene=SGCA">https://www.genecards.org/cgi-bin/carddisp.pl?gene=SGCA</a>               |
| HMBS        | Hydroxymethylbilane Synthase                                     | Protein coding | 44 | GC11P119084 | 1.389948368 | <a href="https://www.genecards.org/cgi-bin/carddisp.pl?gene=HMBS">https://www.genecards.org/cgi-bin/carddisp.pl?gene=HMBS</a>               |
| THUMPD3-AS1 | THUMPD3 Antisense RNA 1                                          | RNA gene       | 15 | GC03M009349 | 1.386561632 | <a href="https://www.genecards.org/cgi-bin/carddisp.pl?gene=THUMPD3-AS1">https://www.genecards.org/cgi-bin/carddisp.pl?gene=THUMPD3-AS1</a> |
| ACVR1       | Activin A Receptor Type 1                                        | Protein coding | 51 | GC02M157736 | 1.386096954 | <a href="https://www.genecards.org/cgi-bin/carddisp.pl?gene=ACVR1">https://www.genecards.org/cgi-bin/carddisp.pl?gene=ACVR1</a>             |
| WT1         | WT1 Transcription Factor                                         | Protein coding | 49 | GC11M032365 | 1.384267569 | <a href="https://www.genecards.org/cgi-bin/carddisp.pl?gene=WT1">https://www.genecards.org/cgi-bin/carddisp.pl?gene=WT1</a>                 |
| TFEB        | Transcription Factor EB                                          | Protein coding | 42 | GC06M049331 | 1.380459905 | <a href="https://www.genecards.org/cgi-bin/carddisp.pl?gene=TFEB">https://www.genecards.org/cgi-bin/carddisp.pl?gene=TFEB</a>               |
| TOMM40      | Translocase Of Outer Mitochondrial Membrane 40                   | Protein coding | 41 | GC19P044890 | 1.378208399 | <a href="https://www.genecards.org/cgi-bin/carddisp.pl?gene=TOMM40">https://www.genecards.org/cgi-bin/carddisp.pl?gene=TOMM40</a>           |
| ACADVL      | Acyl-CoA Dehydrogenase Very Long Chain                           | Protein coding | 45 | GC17P007219 | 1.375214934 | <a href="https://www.genecards.org/cgi-bin/carddisp.pl?gene=ACADVL">https://www.genecards.org/cgi-bin/carddisp.pl?gene=ACADVL</a>           |
| IRAG1       | Inositol 1,4,5-Triphosphate Receptor Associated 1                | Protein coding | 28 | GC11M010733 | 1.374872684 | <a href="https://www.genecards.org/cgi-bin/carddisp.pl?gene=IRAG1">https://www.genecards.org/cgi-bin/carddisp.pl?gene=IRAG1</a>             |
| BCR         | BCR Activator Of RhoGEF And GTPase                               | Protein coding | 51 | GC22P023179 | 1.374191999 | <a href="https://www.genecards.org/cgi-bin/carddisp.pl?gene=BCR">https://www.genecards.org/cgi-bin/carddisp.pl?gene=BCR</a>                 |
| LRP6        | LDL Receptor Related Protein 6                                   | Protein coding | 48 | GC12M016340 | 1.372767925 | <a href="https://www.genecards.org/cgi-bin/carddisp.pl?gene=LRP6">https://www.genecards.org/cgi-bin/carddisp.pl?gene=LRP6</a>               |
| MIR199B     | MicroRNA 199b                                                    | RNA gene       | 20 | GC09M128244 | 1.372199178 | <a href="https://www.genecards.org/cgi-bin/carddisp.pl?gene=MIR199B">https://www.genecards.org/cgi-bin/carddisp.pl?gene=MIR199B</a>         |
| PXDN        | Peroxidasin                                                      | Protein coding | 41 | GC02M001635 | 1.371544838 | <a href="https://www.genecards.org/cgi-bin/carddisp.pl?gene=PXDN">https://www.genecards.org/cgi-bin/carddisp.pl?gene=PXDN</a>               |
| ANG         | Angiogenin                                                       | Protein coding | 45 | GC14P022303 | 1.370412707 | <a href="https://www.genecards.org/cgi-bin/carddisp.pl?gene=ANG">https://www.genecards.org/cgi-bin/carddisp.pl?gene=ANG</a>                 |
| NDRG1       | N-Myc Downstream Regulated 1                                     | Protein coding | 44 | GC08M133237 | 1.370412707 | <a href="https://www.genecards.org/cgi-bin/carddisp.pl?gene=NDRG1">https://www.genecards.org/cgi-bin/carddisp.pl?gene=NDRG1</a>             |
| MOCS1       | Molybdenum Cofactor Synthesis 1                                  | Protein coding | 41 | GC06M039899 | 1.370412707 | <a href="https://www.genecards.org/cgi-bin/carddisp.pl?gene=MOCS1">https://www.genecards.org/cgi-bin/carddisp.pl?gene=MOCS1</a>             |
| MIR375      | MicroRNA 375                                                     | RNA gene       | 20 | GC02M219001 | 1.370412707 | <a href="https://www.genecards.org/cgi-bin/carddisp.pl?gene=MIR375">https://www.genecards.org/cgi-bin/carddisp.pl?gene=MIR375</a>           |
| CALHM1      | Calcium Homeostasis Modulator 1                                  | Protein coding | 33 | GC10M103454 | 1.369681835 | <a href="https://www.genecards.org/cgi-bin/carddisp.pl?gene=CALHM1">https://www.genecards.org/cgi-bin/carddisp.pl?gene=CALHM1</a>           |
| LGALS1      | Galectin 1                                                       | Protein coding | 43 | GC22P037675 | 1.367122293 | <a href="https://www.genecards.org/cgi-bin/carddisp.pl?gene=LGALS1">https://www.genecards.org/cgi-bin/carddisp.pl?gene=LGALS1</a>           |
| HPS4        | HPS4 Biogenesis Of Lysosomal Organelles Complex 3 Subunit 2      | Protein coding | 39 | GC22M026443 | 1.365717292 | <a href="https://www.genecards.org/cgi-bin/carddisp.pl?gene=HPS4">https://www.genecards.org/cgi-bin/carddisp.pl?gene=HPS4</a>               |
| NEURL1      | Neuralized E3 Ubiquitin Protein Ligase 1                         | Protein coding | 36 | GC10P103493 | 1.365717292 | <a href="https://www.genecards.org/cgi-bin/carddisp.pl?gene=NEURL1">https://www.genecards.org/cgi-bin/carddisp.pl?gene=NEURL1</a>           |
| CPNE8       | Copine 8                                                         | Protein coding | 35 | GC12M038646 | 1.365717292 | <a href="https://www.genecards.org/cgi-bin/carddisp.pl?gene=CPNE8">https://www.genecards.org/cgi-bin/carddisp.pl?gene=CPNE8</a>             |
| COL28A1     | Collagen Type XXVIII $\alpha$ 1 Chain                            | Protein coding | 33 | GC07M007338 | 1.365717292 | <a href="https://www.genecards.org/cgi-bin/carddisp.pl?gene=COL28A1">https://www.genecards.org/cgi-bin/carddisp.pl?gene=COL28A1</a>         |
| OBP2B       | Odorant Binding Protein 2B                                       | Protein coding | 30 | GC09M133205 | 1.365717292 | <a href="https://www.genecards.org/cgi-bin/carddisp.pl?gene=OBP2B">https://www.genecards.org/cgi-bin/carddisp.pl?gene=OBP2B</a>             |
| CCNH        | Cyclin H                                                         | Protein coding | 45 | GC05M087311 | 1.364768386 | <a href="https://www.genecards.org/cgi-bin/carddisp.pl?gene=CCNH">https://www.genecards.org/cgi-bin/carddisp.pl?gene=CCNH</a>               |
| FOXP3       | Forkhead Box P3                                                  | Protein coding | 47 | GC0XM049250 | 1.364058375 | <a href="https://www.genecards.org/cgi-bin/carddisp.pl?gene=FOXP3">https://www.genecards.org/cgi-bin/carddisp.pl?gene=FOXP3</a>             |
| IL12B       | Interleukin 12B                                                  | Protein coding | 43 | GC05M159314 | 1.360568523 | <a href="https://www.genecards.org/cgi-bin/carddisp.pl?gene=IL12B">https://www.genecards.org/cgi-bin/carddisp.pl?gene=IL12B</a>             |
| SCN9A       | Sodium Voltage-Gated Channel $\alpha$ Subunit 9                  | Protein coding | 48 | GC02M166195 | 1.360234141 | <a href="https://www.genecards.org/cgi-bin/carddisp.pl?gene=SCN9A">https://www.genecards.org/cgi-bin/carddisp.pl?gene=SCN9A</a>             |
| HMOX2       | Heme Oxygenase 2                                                 | Protein coding | 47 | GC16P004474 | 1.357238412 | <a href="https://www.genecards.org/cgi-bin/carddisp.pl?gene=HMOX2">https://www.genecards.org/cgi-bin/carddisp.pl?gene=HMOX2</a>             |
| CAST        | Calpastatin                                                      | Protein coding | 45 | GC05P096525 | 1.357238412 | <a href="https://www.genecards.org/cgi-bin/carddisp.pl?gene=CAST">https://www.genecards.org/cgi-bin/carddisp.pl?gene=CAST</a>               |

|             |                                                                  |                |    |             |             |                                                                                                                                             |
|-------------|------------------------------------------------------------------|----------------|----|-------------|-------------|---------------------------------------------------------------------------------------------------------------------------------------------|
| CPOX        | Coproporphyrinogen Oxidase                                       | Protein coding | 43 | GC03M098576 | 1.355799198 | <a href="https://www.genecards.org/cgi-bin/carddisp.pl?gene=CPOX">https://www.genecards.org/cgi-bin/carddisp.pl?gene=CPOX</a>               |
| IL15        | Interleukin 15                                                   | Protein coding | 40 | GC04P141636 | 1.35426259  | <a href="https://www.genecards.org/cgi-bin/carddisp.pl?gene=IL15">https://www.genecards.org/cgi-bin/carddisp.pl?gene=IL15</a>               |
| ALDH1L1-AS2 | ALDH1L1 Antisense RNA 2                                          | RNA gene       | 13 | GC03P126180 | 1.351707697 | <a href="https://www.genecards.org/cgi-bin/carddisp.pl?gene=ALDH1L1-AS2">https://www.genecards.org/cgi-bin/carddisp.pl?gene=ALDH1L1-AS2</a> |
| SLIT2       | Slit Guidance Ligand 2                                           | Protein coding | 45 | GC04P020287 | 1.351265311 | <a href="https://www.genecards.org/cgi-bin/carddisp.pl?gene=SLIT2">https://www.genecards.org/cgi-bin/carddisp.pl?gene=SLIT2</a>             |
| HLA-DRB4    | Major Histocompatibility Complex, Class II, DR $\beta$ 4         | Protein coding | 30 | GC06M003851 | 1.348972797 | <a href="https://www.genecards.org/cgi-bin/carddisp.pl?gene=HLA-DRB4">https://www.genecards.org/cgi-bin/carddisp.pl?gene=HLA-DRB4</a>       |
| MS4A1       | Membrane Spanning 4-Domains A1                                   | Protein coding | 46 | GC11P060479 | 1.348146677 | <a href="https://www.genecards.org/cgi-bin/carddisp.pl?gene=MS4A1">https://www.genecards.org/cgi-bin/carddisp.pl?gene=MS4A1</a>             |
| FUCA1       | $\alpha$ -L-Fucosidase 1                                         | Protein coding | 46 | GC01M023845 | 1.34795332  | <a href="https://www.genecards.org/cgi-bin/carddisp.pl?gene=FUCA1">https://www.genecards.org/cgi-bin/carddisp.pl?gene=FUCA1</a>             |
| XPA         | XPA, DNA Damage Recognition And Repair Factor                    | Protein coding | 45 | GC09M097654 | 1.34795332  | <a href="https://www.genecards.org/cgi-bin/carddisp.pl?gene=XPA">https://www.genecards.org/cgi-bin/carddisp.pl?gene=XPA</a>                 |
| AGA         | Aspartylglucosaminidase                                          | Protein coding | 44 | GC04M177430 | 1.34795332  | <a href="https://www.genecards.org/cgi-bin/carddisp.pl?gene=AGA">https://www.genecards.org/cgi-bin/carddisp.pl?gene=AGA</a>                 |
| A4GALT      | $\alpha$ 1,4-Galactosyltransferase (P Blood Group)               | Protein coding | 44 | GC22M042692 | 1.34795332  | <a href="https://www.genecards.org/cgi-bin/carddisp.pl?gene=A4GALT">https://www.genecards.org/cgi-bin/carddisp.pl?gene=A4GALT</a>           |
| TRPA1       | Transient Receptor Potential Cation Channel Subfamily A Member 1 | Protein coding | 45 | GC08M072019 | 1.347014904 | <a href="https://www.genecards.org/cgi-bin/carddisp.pl?gene=TRPA1">https://www.genecards.org/cgi-bin/carddisp.pl?gene=TRPA1</a>             |
| TSPAN9      | Tetraspanin 9                                                    | Protein coding | 38 | GC12P003078 | 1.345620155 | <a href="https://www.genecards.org/cgi-bin/carddisp.pl?gene=TSPAN9">https://www.genecards.org/cgi-bin/carddisp.pl?gene=TSPAN9</a>           |
| CHKA        | Choline Kinase $\alpha$                                          | Protein coding | 41 | GC11M068052 | 1.344339848 | <a href="https://www.genecards.org/cgi-bin/carddisp.pl?gene=CHKA">https://www.genecards.org/cgi-bin/carddisp.pl?gene=CHKA</a>               |
| SHOC2       | SHOC2 Leucine Rich Repeat Scaffold Protein                       | Protein coding | 41 | GC10P110919 | 1.343198419 | <a href="https://www.genecards.org/cgi-bin/carddisp.pl?gene=SHOC2">https://www.genecards.org/cgi-bin/carddisp.pl?gene=SHOC2</a>             |
| STK24       | Serine/Threonine Kinase 24                                       | Protein coding | 44 | GC13M098445 | 1.343003511 | <a href="https://www.genecards.org/cgi-bin/carddisp.pl?gene=STK24">https://www.genecards.org/cgi-bin/carddisp.pl?gene=STK24</a>             |
| FYN         | FYN Proto-Oncogene, Src Family Tyrosine Kinase                   | Protein coding | 47 | GC06M111660 | 1.342020631 | <a href="https://www.genecards.org/cgi-bin/carddisp.pl?gene=FYN">https://www.genecards.org/cgi-bin/carddisp.pl?gene=FYN</a>                 |
| MTFMT       | Mitochondrial Methionyl-TRNA Formyltransferase                   | Protein coding | 41 | GC15M065001 | 1.341048956 | <a href="https://www.genecards.org/cgi-bin/carddisp.pl?gene=MTFMT">https://www.genecards.org/cgi-bin/carddisp.pl?gene=MTFMT</a>             |
| RAB39B      | RAB39B, Member RAS Oncogene Family                               | Protein coding | 39 | GC0XM155259 | 1.341048956 | <a href="https://www.genecards.org/cgi-bin/carddisp.pl?gene=RAB39B">https://www.genecards.org/cgi-bin/carddisp.pl?gene=RAB39B</a>           |
| MIR148B     | MicroRNA 148b                                                    | RNA gene       | 20 | GC12P054337 | 1.338587761 | <a href="https://www.genecards.org/cgi-bin/carddisp.pl?gene=MIR148B">https://www.genecards.org/cgi-bin/carddisp.pl?gene=MIR148B</a>         |
| MIR29B2     | MicroRNA 29b-2                                                   | RNA gene       | 19 | GC01M207806 | 1.338587761 | <a href="https://www.genecards.org/cgi-bin/carddisp.pl?gene=MIR29B2">https://www.genecards.org/cgi-bin/carddisp.pl?gene=MIR29B2</a>         |
| MIR151B     | MicroRNA 151b                                                    | RNA gene       | 13 | GC14M100109 | 1.338587761 | <a href="https://www.genecards.org/cgi-bin/carddisp.pl?gene=MIR151B">https://www.genecards.org/cgi-bin/carddisp.pl?gene=MIR151B</a>         |
| RTEL1       | Regulator Of Telomere Elongation Helicase 1                      | Protein coding | 40 | GC20P063658 | 1.337482452 | <a href="https://www.genecards.org/cgi-bin/carddisp.pl?gene=RTEL1">https://www.genecards.org/cgi-bin/carddisp.pl?gene=RTEL1</a>             |
| ZEB1        | Zinc Finger E-Box Binding Homeobox 1                             | Protein coding | 48 | GC10P031318 | 1.335894108 | <a href="https://www.genecards.org/cgi-bin/carddisp.pl?gene=ZEB1">https://www.genecards.org/cgi-bin/carddisp.pl?gene=ZEB1</a>               |
| MCCC2       | Methylcrotonyl-CoA Carboxylase Subunit 2                         | Protein coding | 44 | GC05P071587 | 1.334229112 | <a href="https://www.genecards.org/cgi-bin/carddisp.pl?gene=MCCC2">https://www.genecards.org/cgi-bin/carddisp.pl?gene=MCCC2</a>             |
| TOLLIP      | Toll Interacting Protein                                         | Protein coding | 43 | GC11M001274 | 1.329763174 | <a href="https://www.genecards.org/cgi-bin/carddisp.pl?gene=TOLLIP">https://www.genecards.org/cgi-bin/carddisp.pl?gene=TOLLIP</a>           |
| SLC7A8      | Solute Carrier Family 7 Member 8                                 | Protein coding | 42 | GC14M023125 | 1.329763174 | <a href="https://www.genecards.org/cgi-bin/carddisp.pl?gene=SLC7A8">https://www.genecards.org/cgi-bin/carddisp.pl?gene=SLC7A8</a>           |
| CCT2        | Chaperonin Containing TCP1 Subunit 2                             | Protein coding | 41 | GC12P069585 | 1.329763174 | <a href="https://www.genecards.org/cgi-bin/carddisp.pl?gene=CCT2">https://www.genecards.org/cgi-bin/carddisp.pl?gene=CCT2</a>               |
| AP3D1       | Adaptor Related Protein Complex 3 Subunit $\delta$ 1             | Protein coding | 40 | GC19M002413 | 1.329763174 | <a href="https://www.genecards.org/cgi-bin/carddisp.pl?gene=AP3D1">https://www.genecards.org/cgi-bin/carddisp.pl?gene=AP3D1</a>             |
| FAM13A      | Family With Sequence Similarity 13 Member A                      | Protein coding | 38 | GC04M088725 | 1.329763174 | <a href="https://www.genecards.org/cgi-bin/carddisp.pl?gene=FAM13A">https://www.genecards.org/cgi-bin/carddisp.pl?gene=FAM13A</a>           |
| ZNF618      | Zinc Finger Protein 618                                          | Protein coding | 34 | GC09P113876 | 1.329763174 | <a href="https://www.genecards.org/cgi-bin/carddisp.pl?gene=ZNF618">https://www.genecards.org/cgi-bin/carddisp.pl?gene=ZNF618</a>           |
| MIR320A     | MicroRNA 320a                                                    | RNA gene       | 20 | GC08M022249 | 1.329652905 | <a href="https://www.genecards.org/cgi-bin/carddisp.pl?gene=MIR320A">https://www.genecards.org/cgi-bin/carddisp.pl?gene=MIR320A</a>         |
| DIO1        | Iodothyronine Deiodinase 1                                       | Protein coding | 40 | GC01P053891 | 1.328448772 | <a href="https://www.genecards.org/cgi-bin/carddisp.pl?gene=DIO1">https://www.genecards.org/cgi-bin/carddisp.pl?gene=DIO1</a>               |
| MIR483      | MicroRNA 483                                                     | RNA gene       | 19 | GC11M002228 | 1.327159166 | <a href="https://www.genecards.org/cgi-bin/carddisp.pl?gene=MIR483">https://www.genecards.org/cgi-bin/carddisp.pl?gene=MIR483</a>           |
| IL10RB      | Interleukin 10 Receptor Subunit $\beta$                          | Protein coding | 44 | GC21P033266 | 1.326437473 | <a href="https://www.genecards.org/cgi-bin/carddisp.pl?gene=IL10RB">https://www.genecards.org/cgi-bin/carddisp.pl?gene=IL10RB</a>           |
| CHRNA4      | Cholinergic Receptor Nicotinic $\beta$ 4 Subunit                 | Protein coding | 44 | GC15M078624 | 1.325379252 | <a href="https://www.genecards.org/cgi-bin/carddisp.pl?gene=CHRNA4">https://www.genecards.org/cgi-bin/carddisp.pl?gene=CHRNA4</a>           |
| MIR93       | MicroRNA 93                                                      | RNA gene       | 21 | GC07M100602 | 1.322424293 | <a href="https://www.genecards.org/cgi-bin/carddisp.pl?gene=MIR93">https://www.genecards.org/cgi-bin/carddisp.pl?gene=MIR93</a>             |
| TNFAIP8L2   | TNF $\alpha$ Induced Protein 8 Like 2                            | Protein coding | 33 | GC01P151156 | 1.320478082 | <a href="https://www.genecards.org/cgi-bin/carddisp.pl?gene=TNFAIP8L2">https://www.genecards.org/cgi-bin/carddisp.pl?gene=TNFAIP8L2</a>     |
| MAP3K11     | Mitogen-Activated Protein Kinase Kinase Kinase 11                | Protein coding | 48 | GC11M071696 | 1.316622376 | <a href="https://www.genecards.org/cgi-bin/carddisp.pl?gene=MAP3K11">https://www.genecards.org/cgi-bin/carddisp.pl?gene=MAP3K11</a>         |
| MYLK-AS1    | MYLK Antisense RNA 1                                             | RNA gene       | 17 | GC03P123588 | 1.315974712 | <a href="https://www.genecards.org/cgi-bin/carddisp.pl?gene=MYLK-AS1">https://www.genecards.org/cgi-bin/carddisp.pl?gene=MYLK-AS1</a>       |
| LINC01389   | Long Intergenic Non-Protein Coding RNA 1389                      | RNA gene       | 13 | GC01M047380 | 1.315974712 | <a href="https://www.genecards.org/cgi-bin/carddisp.pl?gene=LINC01389">https://www.genecards.org/cgi-bin/carddisp.pl?gene=LINC01389</a>     |
| HLA-A       | Major Histocompatibility Complex, Class I, A                     | Protein coding | 47 | GC06P058250 | 1.313254952 | <a href="https://www.genecards.org/cgi-bin/carddisp.pl?gene=HLA-A">https://www.genecards.org/cgi-bin/carddisp.pl?gene=HLA-A</a>             |
| MIR192      | MicroRNA 192                                                     | RNA gene       | 22 | GC11M064891 | 1.313088179 | <a href="https://www.genecards.org/cgi-bin/carddisp.pl?gene=MIR192">https://www.genecards.org/cgi-bin/carddisp.pl?gene=MIR192</a>           |
| PRKCQ       | Protein Kinase C $\theta$                                        | Protein coding | 50 | GC10M006393 | 1.312726974 | <a href="https://www.genecards.org/cgi-bin/carddisp.pl?gene=PRKCQ">https://www.genecards.org/cgi-bin/carddisp.pl?gene=PRKCQ</a>             |
| ROR2        | Receptor Tyrosine Kinase Like Orphan Receptor 2                  | Protein coding | 48 | GC09M091564 | 1.312726974 | <a href="https://www.genecards.org/cgi-bin/carddisp.pl?gene=ROR2">https://www.genecards.org/cgi-bin/carddisp.pl?gene=ROR2</a>               |
| DOCK1       | Dedicator Of Cytokinesis 1                                       | Protein coding | 45 | GC10P126905 | 1.312726974 | <a href="https://www.genecards.org/cgi-bin/carddisp.pl?gene=DOCK1">https://www.genecards.org/cgi-bin/carddisp.pl?gene=DOCK1</a>             |
| POLR1D      | RNA Polymerase I And III Subunit D                               | Protein coding | 45 | GC13P027620 | 1.312726974 | <a href="https://www.genecards.org/cgi-bin/carddisp.pl?gene=POLR1D">https://www.genecards.org/cgi-bin/carddisp.pl?gene=POLR1D</a>           |
| PSMB4       | Proteasome 20S Subunit $\beta$ 4                                 | Protein coding | 45 | GC01P151372 | 1.312726974 | <a href="https://www.genecards.org/cgi-bin/carddisp.pl?gene=PSMB4">https://www.genecards.org/cgi-bin/carddisp.pl?gene=PSMB4</a>             |
| PML         | PML Nuclear Body Scaffold                                        | Protein coding | 45 | GC15P073994 | 1.312726974 | <a href="https://www.genecards.org/cgi-bin/carddisp.pl?gene=PML">https://www.genecards.org/cgi-bin/carddisp.pl?gene=PML</a>                 |
| NDST1       | N-Deacetylase And N-Sulfotransferase 1                           | Protein coding | 45 | GC05P150484 | 1.312726974 | <a href="https://www.genecards.org/cgi-bin/carddisp.pl?gene=NDST1">https://www.genecards.org/cgi-bin/carddisp.pl?gene=NDST1</a>             |
| CDH15       | Cadherin 15                                                      | Protein coding | 44 | GC16P089171 | 1.312726974 | <a href="https://www.genecards.org/cgi-bin/carddisp.pl?gene=CDH15">https://www.genecards.org/cgi-bin/carddisp.pl?gene=CDH15</a>             |
| PSMA4       | Proteasome 20S Subunit $\alpha$ 4                                | Protein coding | 44 | GC15P078540 | 1.312726974 | <a href="https://www.genecards.org/cgi-bin/carddisp.pl?gene=PSMA4">https://www.genecards.org/cgi-bin/carddisp.pl?gene=PSMA4</a>             |
| TFF1        | Trefoil Factor 1                                                 | Protein coding | 44 | GC21M042362 | 1.312726974 | <a href="https://www.genecards.org/cgi-bin/carddisp.pl?gene=TFF1">https://www.genecards.org/cgi-bin/carddisp.pl?gene=TFF1</a>               |
| COLEC11     | Collectin Subfamily Member 11                                    | Protein coding | 43 | GC02P003594 | 1.312726974 | <a href="https://www.genecards.org/cgi-bin/carddisp.pl?gene=COLEC11">https://www.genecards.org/cgi-bin/carddisp.pl?gene=COLEC11</a>         |
| FOXF1       | Forkhead Box F1                                                  | Protein coding | 43 | GC16P086510 | 1.312726974 | <a href="https://www.genecards.org/cgi-bin/carddisp.pl?gene=FOXF1">https://www.genecards.org/cgi-bin/carddisp.pl?gene=FOXF1</a>             |
| MAPKAP1     | MAPK Associated Protein 1                                        | Protein coding | 43 | GC09M125437 | 1.312726974 | <a href="https://www.genecards.org/cgi-bin/carddisp.pl?gene=MAPKAP1">https://www.genecards.org/cgi-bin/carddisp.pl?gene=MAPKAP1</a>         |
| UBE2R2      | Ubiquitin Conjugating Enzyme E2 R2                               | Protein coding | 43 | GC09P033817 | 1.312726974 | <a href="https://www.genecards.org/cgi-bin/carddisp.pl?gene=UBE2R2">https://www.genecards.org/cgi-bin/carddisp.pl?gene=UBE2R2</a>           |
| NADSYN1     | NAD Synthetase 1                                                 | Protein coding | 41 | GC11P071454 | 1.312726974 | <a href="https://www.genecards.org/cgi-bin/carddisp.pl?gene=NADSYN1">https://www.genecards.org/cgi-bin/carddisp.pl?gene=NADSYN1</a>         |
| COL13A1     | Collagen Type XIII $\alpha$ 1 Chain                              | Protein coding | 40 | GC10P069801 | 1.312726974 | <a href="https://www.genecards.org/cgi-bin/carddisp.pl?gene=COL13A1">https://www.genecards.org/cgi-bin/carddisp.pl?gene=COL13A1</a>         |
| FUT7        | Fucosyltransferase 7                                             | Protein coding | 40 | GC09M137030 | 1.312726974 | <a href="https://www.genecards.org/cgi-bin/carddisp.pl?gene=FUT7">https://www.genecards.org/cgi-bin/carddisp.pl?gene=FUT7</a>               |
| PPP1R12B    | Protein Phosphatase 1 Regulatory Subunit 12B                     | Protein coding | 40 | GC01P202348 | 1.312726974 | <a href="https://www.genecards.org/cgi-bin/carddisp.pl?gene=PPP1R12B">https://www.genecards.org/cgi-bin/carddisp.pl?gene=PPP1R12B</a>       |
| PIGG        | Phosphatidylinositol Glycan Anchor Biosynthesis Class G          | Protein coding | 40 | GC04P000522 | 1.312726974 | <a href="https://www.genecards.org/cgi-bin/carddisp.pl?gene=PIGG">https://www.genecards.org/cgi-bin/carddisp.pl?gene=PIGG</a>               |
| PITRM1      | Pitrilysin Metallopeptidase 1                                    | Protein coding | 40 | GC10M003138 | 1.312726974 | <a href="https://www.genecards.org/cgi-bin/carddisp.pl?gene=PITRM1">https://www.genecards.org/cgi-bin/carddisp.pl?gene=PITRM1</a>           |
| MCC         | MCC Regulator Of WNT Signaling Pathway                           | Protein coding | 40 | GC05M113022 | 1.312726974 | <a href="https://www.genecards.org/cgi-bin/carddisp.pl?gene=MCC">https://www.genecards.org/cgi-bin/carddisp.pl?gene=MCC</a>                 |
| NUP210      | Nucleoporin 210                                                  | Protein coding | 40 | GC03M017371 | 1.312726974 | <a href="https://www.genecards.org/cgi-bin/carddisp.pl?gene=NUP210">https://www.genecards.org/cgi-bin/carddisp.pl?gene=NUP210</a>           |
| TBCD        | Tubulin Folding Cofactor D                                       | Protein coding | 40 | GC17P082752 | 1.312726974 | <a href="https://www.genecards.org/cgi-bin/carddisp.pl?gene=TBCD">https://www.genecards.org/cgi-bin/carddisp.pl?gene=TBCD</a>               |
| UHRF1       | Ubiquitin Like With PHD And Ring Finger Domains 1                | Protein coding | 40 | GC19P004910 | 1.312726974 | <a href="https://www.genecards.org/cgi-bin/carddisp.pl?gene=UHRF1">https://www.genecards.org/cgi-bin/carddisp.pl?gene=UHRF1</a>             |
| USP20       | Ubiquitin Specific Peptidase 20                                  | Protein coding | 40 | GC09P129834 | 1.312726974 | <a href="https://www.genecards.org/cgi-bin/carddisp.pl?gene=USP20">https://www.genecards.org/cgi-bin/carddisp.pl?gene=USP20</a>             |
| RGS12       | Regulator Of G Protein Signaling 12                              | Protein coding | 40 | GC04P003292 | 1.312726974 | <a href="https://www.genecards.org/cgi-bin/carddisp.pl?gene=RGS12">https://www.genecards.org/cgi-bin/carddisp.pl?gene=RGS12</a>             |
| WNK2        | WNK Lysine Deficient Protein Kinase 2                            | Protein coding | 40 | GC09P093184 | 1.312726974 | <a href="https://www.genecards.org/cgi-bin/carddisp.pl?gene=WNK2">https://www.genecards.org/cgi-bin/carddisp.pl?gene=WNK2</a>               |
| ERGIC1      | Endoplasmic Reticulum-Golgi Intermediate Compartment 1           | Protein coding | 39 | GC05P172834 | 1.312726974 | <a href="https://www.genecards.org/cgi-bin/carddisp.pl?gene=ERGIC1">https://www.genecards.org/cgi-bin/carddisp.pl?gene=ERGIC1</a>           |
| GAS7        | Growth Arrest Specific 7                                         | Protein coding | 39 | GC17M009910 | 1.312726974 | <a href="https://www.genecards.org/cgi-bin/carddisp.pl?gene=GAS7">https://www.genecards.org/cgi-bin/carddisp.pl?gene=GAS7</a>               |
| NVL         | Nuclear VCP Like                                                 | Protein coding | 39 | GC01M224227 | 1.312726974 | <a href="https://www.genecards.org/cgi-bin/carddisp.pl?gene=NVL">https://www.genecards.org/cgi-bin/carddisp.pl?gene=NVL</a>                 |
| SIX5        | SIX Homeobox 5                                                   | Protein coding | 39 | GC19M045764 | 1.312726974 | <a href="https://www.genecards.org/cgi-bin/carddisp.pl?gene=SIX5">https://www.genecards.org/cgi-bin/carddisp.pl?gene=SIX5</a>               |
| DIDO1       | Death Inducer-Obliterator 1                                      | Protein coding | 38 | GC20M062877 | 1.312726974 | <a href="https://www.genecards.org/cgi-bin/carddisp.pl?gene=DIDO1">https://www.genecards.org/cgi-bin/carddisp.pl?gene=DIDO1</a>             |
| ITM2C       | Integral Membrane Protein 2C                                     | Protein coding | 38 | GC02P230864 | 1.312726974 | <a href="https://www.genecards.org/cgi-bin/carddisp.pl?gene=ITM2C">https://www.genecards.org/cgi-bin/carddisp.pl?gene=ITM2C</a>             |
| ZNF79       | Zinc Finger Protein 79                                           | Protein coding | 38 | GC09P127424 | 1.312726974 | <a href="https://www.genecards.org/cgi-bin/carddisp.pl?gene=ZNF79">https://www.genecards.org/cgi-bin/carddisp.pl?gene=ZNF79</a>             |

|          |                                                                        |                |    |             |             |                                                                                                                                       |
|----------|------------------------------------------------------------------------|----------------|----|-------------|-------------|---------------------------------------------------------------------------------------------------------------------------------------|
| PANX2    | Pannexin 2                                                             | Protein coding | 38 | GC22P050170 | 1.312726974 | <a href="https://www.genecards.org/cgi-bin/carddisp.pl?gene=PANX2">https://www.genecards.org/cgi-bin/carddisp.pl?gene=PANX2</a>       |
| OGDHL    | Oxoglutarate Dehydrogenase L                                           | Protein coding | 38 | GC10M049734 | 1.312726974 | <a href="https://www.genecards.org/cgi-bin/carddisp.pl?gene=OGDHL">https://www.genecards.org/cgi-bin/carddisp.pl?gene=OGDHL</a>       |
| SS18L1   | SS18L1 Subunit Of BAF Chromatin Remodeling Complex                     | Protein coding | 38 | GC20P062143 | 1.312726974 | <a href="https://www.genecards.org/cgi-bin/carddisp.pl?gene=SS18L1">https://www.genecards.org/cgi-bin/carddisp.pl?gene=SS18L1</a>     |
| TCF25    | Transcription Factor 25                                                | Protein coding | 38 | GC16P089873 | 1.312726974 | <a href="https://www.genecards.org/cgi-bin/carddisp.pl?gene=TCF25">https://www.genecards.org/cgi-bin/carddisp.pl?gene=TCF25</a>       |
| USP37    | Ubiquitin Specific Peptidase 37                                        | Protein coding | 38 | GC02M218450 | 1.312726974 | <a href="https://www.genecards.org/cgi-bin/carddisp.pl?gene=USP37">https://www.genecards.org/cgi-bin/carddisp.pl?gene=USP37</a>       |
| SPTBN4   | Spectrin $\beta$ , Non-Erythrocytic 4                                  | Protein coding | 38 | GC19P040466 | 1.312726974 | <a href="https://www.genecards.org/cgi-bin/carddisp.pl?gene=SPTBN4">https://www.genecards.org/cgi-bin/carddisp.pl?gene=SPTBN4</a>     |
| COL23A1  | Collagen Type XXIII $\alpha$ 1 Chain                                   | Protein coding | 37 | GC05M178237 | 1.312726974 | <a href="https://www.genecards.org/cgi-bin/carddisp.pl?gene=COL23A1">https://www.genecards.org/cgi-bin/carddisp.pl?gene=COL23A1</a>   |
| CUL9     | Cullin 9                                                               | Protein coding | 37 | GC06P043182 | 1.312726974 | <a href="https://www.genecards.org/cgi-bin/carddisp.pl?gene=CUL9">https://www.genecards.org/cgi-bin/carddisp.pl?gene=CUL9</a>         |
| CDYL2    | Chromodomain Y Like 2                                                  | Protein coding | 36 | GC16M080598 | 1.312726974 | <a href="https://www.genecards.org/cgi-bin/carddisp.pl?gene=CDYL2">https://www.genecards.org/cgi-bin/carddisp.pl?gene=CDYL2</a>       |
| ADAMTSL5 | ADAMTS Like 5                                                          | Protein coding | 36 | GC19M002338 | 1.312726974 | <a href="https://www.genecards.org/cgi-bin/carddisp.pl?gene=ADAMTSL5">https://www.genecards.org/cgi-bin/carddisp.pl?gene=ADAMTSL5</a> |
| OSGIN1   | Oxidative Stress Induced Growth Inhibitor 1                            | Protein coding | 36 | GC16P083934 | 1.312726974 | <a href="https://www.genecards.org/cgi-bin/carddisp.pl?gene=OSGIN1">https://www.genecards.org/cgi-bin/carddisp.pl?gene=OSGIN1</a>     |
| SDK1     | Sidekick Cell Adhesion Molecule 1                                      | Protein coding | 36 | GC07P003307 | 1.312726974 | <a href="https://www.genecards.org/cgi-bin/carddisp.pl?gene=SDK1">https://www.genecards.org/cgi-bin/carddisp.pl?gene=SDK1</a>         |
| ZNF607   | Zinc Finger Protein 607                                                | Protein coding | 36 | GC19M037696 | 1.312726974 | <a href="https://www.genecards.org/cgi-bin/carddisp.pl?gene=ZNF607">https://www.genecards.org/cgi-bin/carddisp.pl?gene=ZNF607</a>     |
| MYO7B    | Myosin VIIIB                                                           | Protein coding | 35 | GC02P127535 | 1.312726974 | <a href="https://www.genecards.org/cgi-bin/carddisp.pl?gene=MYO7B">https://www.genecards.org/cgi-bin/carddisp.pl?gene=MYO7B</a>       |
| MEGF11   | Multiple EGF Like Domains 11                                           | Protein coding | 35 | GC15M068955 | 1.312726974 | <a href="https://www.genecards.org/cgi-bin/carddisp.pl?gene=MEGF11">https://www.genecards.org/cgi-bin/carddisp.pl?gene=MEGF11</a>     |
| RABGAP1L | RAB GTPase Activating Protein 1 Like                                   | Protein coding | 35 | GC01P174128 | 1.312726974 | <a href="https://www.genecards.org/cgi-bin/carddisp.pl?gene=RABGAP1L">https://www.genecards.org/cgi-bin/carddisp.pl?gene=RABGAP1L</a> |
| CCDC86   | Coiled-Coil Domain Containing 86                                       | Protein coding | 34 | GC11P060865 | 1.312726974 | <a href="https://www.genecards.org/cgi-bin/carddisp.pl?gene=CCDC86">https://www.genecards.org/cgi-bin/carddisp.pl?gene=CCDC86</a>     |
| GPR160   | G Protein-Coupled Receptor 160                                         | Protein coding | 34 | GC03P170037 | 1.312726974 | <a href="https://www.genecards.org/cgi-bin/carddisp.pl?gene=GPR160">https://www.genecards.org/cgi-bin/carddisp.pl?gene=GPR160</a>     |
| PNLDC1   | PARN Like Ribonuclease Domain Containing Exonuclease 1                 | Protein coding | 34 | GC06P159823 | 1.312726974 | <a href="https://www.genecards.org/cgi-bin/carddisp.pl?gene=PNLDC1">https://www.genecards.org/cgi-bin/carddisp.pl?gene=PNLDC1</a>     |
| DIP2C    | Disco Interacting Protein 2 Homolog C                                  | Protein coding | 33 | GC10M000274 | 1.312726974 | <a href="https://www.genecards.org/cgi-bin/carddisp.pl?gene=DIP2C">https://www.genecards.org/cgi-bin/carddisp.pl?gene=DIP2C</a>       |
| TMEM39A  | Transmembrane Protein 39A                                              | Protein coding | 33 | GC03M119428 | 1.312726974 | <a href="https://www.genecards.org/cgi-bin/carddisp.pl?gene=TMEM39A">https://www.genecards.org/cgi-bin/carddisp.pl?gene=TMEM39A</a>   |
| RAB6C    | RAB6C, Member RAS Oncogene Family                                      | Protein coding | 33 | GC02P129979 | 1.312726974 | <a href="https://www.genecards.org/cgi-bin/carddisp.pl?gene=RAB6C">https://www.genecards.org/cgi-bin/carddisp.pl?gene=RAB6C</a>       |
| ZC3H3    | Zinc Finger CCCH-Type Containing 3                                     | Protein coding | 33 | GC08M143437 | 1.312726974 | <a href="https://www.genecards.org/cgi-bin/carddisp.pl?gene=ZC3H3">https://www.genecards.org/cgi-bin/carddisp.pl?gene=ZC3H3</a>       |
| ZSWIM2   | Zinc Finger SWIM-Type Containing 2                                     | Protein coding | 30 | GC02M186827 | 1.312726974 | <a href="https://www.genecards.org/cgi-bin/carddisp.pl?gene=ZSWIM2">https://www.genecards.org/cgi-bin/carddisp.pl?gene=ZSWIM2</a>     |
| TRPC1    | Transient Receptor Potential Cation Channel Subfamily C Member 1       | Protein coding | 43 | GC03P142724 | 1.312528968 | <a href="https://www.genecards.org/cgi-bin/carddisp.pl?gene=TRPC1">https://www.genecards.org/cgi-bin/carddisp.pl?gene=TRPC1</a>       |
| SMAD9    | SMAD Family Member 9                                                   | Protein coding | 46 | GC13M036844 | 1.311860085 | <a href="https://www.genecards.org/cgi-bin/carddisp.pl?gene=SMAD9">https://www.genecards.org/cgi-bin/carddisp.pl?gene=SMAD9</a>       |
| ZIC3     | Zic Family Member 3                                                    | Protein coding | 47 | GC0XP137566 | 1.31091547  | <a href="https://www.genecards.org/cgi-bin/carddisp.pl?gene=ZIC3">https://www.genecards.org/cgi-bin/carddisp.pl?gene=ZIC3</a>         |
| SFTPD    | Surfactant Protein D                                                   | Protein coding | 43 | GC10M079937 | 1.31091547  | <a href="https://www.genecards.org/cgi-bin/carddisp.pl?gene=SFTPD">https://www.genecards.org/cgi-bin/carddisp.pl?gene=SFTPD</a>       |
| KCNN3    | Potassium Calcium-Activated Channel Subfamily N Member 3               | Protein coding | 44 | GC01M154697 | 1.308929086 | <a href="https://www.genecards.org/cgi-bin/carddisp.pl?gene=KCNN3">https://www.genecards.org/cgi-bin/carddisp.pl?gene=KCNN3</a>       |
| TKT      | Transketolase                                                          | Protein coding | 47 | GC03M053224 | 1.306925774 | <a href="https://www.genecards.org/cgi-bin/carddisp.pl?gene=TKT">https://www.genecards.org/cgi-bin/carddisp.pl?gene=TKT</a>           |
| HNRNPK   | Heterogeneous Nuclear Ribonucleoprotein K                              | Protein coding | 45 | GC09M086732 | 1.303734183 | <a href="https://www.genecards.org/cgi-bin/carddisp.pl?gene=HNRNPK">https://www.genecards.org/cgi-bin/carddisp.pl?gene=HNRNPK</a>     |
| SGPL1    | Sphingosine-1-Phosphate Lyase 1                                        | Protein coding | 45 | GC10P070815 | 1.303734183 | <a href="https://www.genecards.org/cgi-bin/carddisp.pl?gene=SGPL1">https://www.genecards.org/cgi-bin/carddisp.pl?gene=SGPL1</a>       |
| CAPZA2   | Capping Actin Protein Of Muscle Z-Line Subunit $\alpha$ 2              | Protein coding | 41 | GC07P116811 | 1.303734183 | <a href="https://www.genecards.org/cgi-bin/carddisp.pl?gene=CAPZA2">https://www.genecards.org/cgi-bin/carddisp.pl?gene=CAPZA2</a>     |
| CD55     | CD55 Molecule (Cromer Blood Group)                                     | Protein coding | 47 | GC01P207321 | 1.303655982 | <a href="https://www.genecards.org/cgi-bin/carddisp.pl?gene=CD55">https://www.genecards.org/cgi-bin/carddisp.pl?gene=CD55</a>         |
| AKR1D1   | Aldo-Keto Reductase Family 1 Member D1                                 | Protein coding | 46 | GC07P138003 | 1.303144693 | <a href="https://www.genecards.org/cgi-bin/carddisp.pl?gene=AKR1D1">https://www.genecards.org/cgi-bin/carddisp.pl?gene=AKR1D1</a>     |
| SOX5     | SRY-Box Transcription Factor 5                                         | Protein coding | 46 | GC12M023529 | 1.303144693 | <a href="https://www.genecards.org/cgi-bin/carddisp.pl?gene=SOX5">https://www.genecards.org/cgi-bin/carddisp.pl?gene=SOX5</a>         |
| SKI      | SKI Proto-Oncogene                                                     | Protein coding | 45 | GC01P002228 | 1.303144693 | <a href="https://www.genecards.org/cgi-bin/carddisp.pl?gene=SKI">https://www.genecards.org/cgi-bin/carddisp.pl?gene=SKI</a>           |
| PEX1     | Peroxisomal Biogenesis Factor 1                                        | Protein coding | 45 | GC07M092487 | 1.303144693 | <a href="https://www.genecards.org/cgi-bin/carddisp.pl?gene=PEX1">https://www.genecards.org/cgi-bin/carddisp.pl?gene=PEX1</a>         |
| ARID1A   | AT-Rich Interaction Domain 1A                                          | Protein coding | 44 | GC01P026693 | 1.303144693 | <a href="https://www.genecards.org/cgi-bin/carddisp.pl?gene=ARID1A">https://www.genecards.org/cgi-bin/carddisp.pl?gene=ARID1A</a>     |
| NDUFS6   | NADH:Ubiquinone Oxidoreductase Subunit S6                              | Protein coding | 44 | GC05P001801 | 1.303144693 | <a href="https://www.genecards.org/cgi-bin/carddisp.pl?gene=NDUFS6">https://www.genecards.org/cgi-bin/carddisp.pl?gene=NDUFS6</a>     |
| FXR1     | FMR1 Autosomal Homolog 1                                               | Protein coding | 43 | GC03P180868 | 1.303144693 | <a href="https://www.genecards.org/cgi-bin/carddisp.pl?gene=FXR1">https://www.genecards.org/cgi-bin/carddisp.pl?gene=FXR1</a>         |
| PIGV     | Phosphatidylinositol Glycan Anchor Biosynthesis Class V                | Protein coding | 42 | GC01P026787 | 1.303144693 | <a href="https://www.genecards.org/cgi-bin/carddisp.pl?gene=PIGV">https://www.genecards.org/cgi-bin/carddisp.pl?gene=PIGV</a>         |
| PEX10    | Peroxisomal Biogenesis Factor 10                                       | Protein coding | 42 | GC01M002403 | 1.303144693 | <a href="https://www.genecards.org/cgi-bin/carddisp.pl?gene=PEX10">https://www.genecards.org/cgi-bin/carddisp.pl?gene=PEX10</a>       |
| SEMA3C   | Semaphorin 3C                                                          | Protein coding | 42 | GC07M080742 | 1.303144693 | <a href="https://www.genecards.org/cgi-bin/carddisp.pl?gene=SEMA3C">https://www.genecards.org/cgi-bin/carddisp.pl?gene=SEMA3C</a>     |
| CARS2    | CysteinyI-TRNA Synthetase 2, Mitochondrial                             | Protein coding | 41 | GC13M110641 | 1.303144693 | <a href="https://www.genecards.org/cgi-bin/carddisp.pl?gene=CARS2">https://www.genecards.org/cgi-bin/carddisp.pl?gene=CARS2</a>       |
| DNAJC19  | DnaJ Heat Shock Protein Family (Hsp40) Member C19                      | Protein coding | 41 | GC03M180983 | 1.303144693 | <a href="https://www.genecards.org/cgi-bin/carddisp.pl?gene=DNAJC19">https://www.genecards.org/cgi-bin/carddisp.pl?gene=DNAJC19</a>   |
| NRCAM    | Neuronal Cell Adhesion Molecule                                        | Protein coding | 41 | GC07M108147 | 1.303144693 | <a href="https://www.genecards.org/cgi-bin/carddisp.pl?gene=NRCAM">https://www.genecards.org/cgi-bin/carddisp.pl?gene=NRCAM</a>       |
| DNAJB11  | DnaJ Heat Shock Protein Family (Hsp40) Member B11                      | Protein coding | 40 | GC03P186567 | 1.303144693 | <a href="https://www.genecards.org/cgi-bin/carddisp.pl?gene=DNAJB11">https://www.genecards.org/cgi-bin/carddisp.pl?gene=DNAJB11</a>   |
| CNTN6    | Contactin 6                                                            | Protein coding | 40 | GC03P000978 | 1.303144693 | <a href="https://www.genecards.org/cgi-bin/carddisp.pl?gene=CNTN6">https://www.genecards.org/cgi-bin/carddisp.pl?gene=CNTN6</a>       |
| TTC8     | Tetratricopeptide Repeat Domain 8                                      | Protein coding | 40 | GC14P089380 | 1.303144693 | <a href="https://www.genecards.org/cgi-bin/carddisp.pl?gene=TTC8">https://www.genecards.org/cgi-bin/carddisp.pl?gene=TTC8</a>         |
| SORBS2   | Sorbin And SH3 Domain Containing 2                                     | Protein coding | 40 | GC04M185585 | 1.303144693 | <a href="https://www.genecards.org/cgi-bin/carddisp.pl?gene=SORBS2">https://www.genecards.org/cgi-bin/carddisp.pl?gene=SORBS2</a>     |
| CADPS2   | Calcium Dependent Secretion Activator 2                                | Protein coding | 38 | GC07M122318 | 1.303144693 | <a href="https://www.genecards.org/cgi-bin/carddisp.pl?gene=CADPS2">https://www.genecards.org/cgi-bin/carddisp.pl?gene=CADPS2</a>     |
| HNRNPA3  | Heterogeneous Nuclear Ribonucleoprotein A3                             | Protein coding | 38 | GC02P177212 | 1.303144693 | <a href="https://www.genecards.org/cgi-bin/carddisp.pl?gene=HNRNPA3">https://www.genecards.org/cgi-bin/carddisp.pl?gene=HNRNPA3</a>   |
| DEFA3    | Defensin $\alpha$ 3                                                    | Protein coding | 37 | GC08M007015 | 1.303144693 | <a href="https://www.genecards.org/cgi-bin/carddisp.pl?gene=DEFA3">https://www.genecards.org/cgi-bin/carddisp.pl?gene=DEFA3</a>       |
| CRTAC1   | Cartilage Acidic Protein 1                                             | Protein coding | 37 | GC10M097865 | 1.303144693 | <a href="https://www.genecards.org/cgi-bin/carddisp.pl?gene=CRTAC1">https://www.genecards.org/cgi-bin/carddisp.pl?gene=CRTAC1</a>     |
| EPG5     | Ectopic P-Granules Autophagy Protein 5 Homolog                         | Protein coding | 36 | GC18M045800 | 1.303144693 | <a href="https://www.genecards.org/cgi-bin/carddisp.pl?gene=EPG5">https://www.genecards.org/cgi-bin/carddisp.pl?gene=EPG5</a>         |
| KCTD13   | Potassium Channel Tetramerization Domain Containing 13                 | Protein coding | 36 | GC16M029905 | 1.303144693 | <a href="https://www.genecards.org/cgi-bin/carddisp.pl?gene=KCTD13">https://www.genecards.org/cgi-bin/carddisp.pl?gene=KCTD13</a>     |
| RER1     | Retention In Endoplasmic Reticulum Sorting Receptor 1                  | Protein coding | 34 | GC01P002391 | 1.303144693 | <a href="https://www.genecards.org/cgi-bin/carddisp.pl?gene=RER1">https://www.genecards.org/cgi-bin/carddisp.pl?gene=RER1</a>         |
| SBF2-AS1 | SBF2 Antisense RNA 1                                                   | RNA gene       | 16 | GC11P009758 | 1.303144693 | <a href="https://www.genecards.org/cgi-bin/carddisp.pl?gene=SBF2-AS1">https://www.genecards.org/cgi-bin/carddisp.pl?gene=SBF2-AS1</a> |
| MIR4497  | MicroRNA 4497                                                          | RNA gene       | 11 | GC12P109833 | 1.303144693 | <a href="https://www.genecards.org/cgi-bin/carddisp.pl?gene=MIR4497">https://www.genecards.org/cgi-bin/carddisp.pl?gene=MIR4497</a>   |
| MIR181B1 | MicroRNA 181b-1                                                        | RNA gene       | 20 | GC01M198858 | 1.302632451 | <a href="https://www.genecards.org/cgi-bin/carddisp.pl?gene=MIR181B1">https://www.genecards.org/cgi-bin/carddisp.pl?gene=MIR181B1</a> |
| MIR181B2 | MicroRNA 181b-2                                                        | RNA gene       | 20 | GC09P124693 | 1.302632451 | <a href="https://www.genecards.org/cgi-bin/carddisp.pl?gene=MIR181B2">https://www.genecards.org/cgi-bin/carddisp.pl?gene=MIR181B2</a> |
| NUDT6    | Nudix Hydrolase 6                                                      | Protein coding | 38 | GC04M122888 | 1.301500082 | <a href="https://www.genecards.org/cgi-bin/carddisp.pl?gene=NUDT6">https://www.genecards.org/cgi-bin/carddisp.pl?gene=NUDT6</a>       |
| ABCC3    | ATP Binding Cassette Subfamily C Member 3                              | Protein coding | 46 | GC17P050634 | 1.300859213 | <a href="https://www.genecards.org/cgi-bin/carddisp.pl?gene=ABCC3">https://www.genecards.org/cgi-bin/carddisp.pl?gene=ABCC3</a>       |
| PCDHGA3  | Protocadherin $\gamma$ Subfamily A, 3                                  | Protein coding | 33 | GC05P144099 | 1.300859213 | <a href="https://www.genecards.org/cgi-bin/carddisp.pl?gene=PCDHGA3">https://www.genecards.org/cgi-bin/carddisp.pl?gene=PCDHGA3</a>   |
| MIR17HG  | MiR-17-92a-1 Cluster Host Gene                                         | RNA gene       | 26 | GC13P091347 | 1.300859213 | <a href="https://www.genecards.org/cgi-bin/carddisp.pl?gene=MIR17HG">https://www.genecards.org/cgi-bin/carddisp.pl?gene=MIR17HG</a>   |
| MIR335   | MicroRNA 335                                                           | RNA gene       | 18 | GC07P130496 | 1.300859213 | <a href="https://www.genecards.org/cgi-bin/carddisp.pl?gene=MIR335">https://www.genecards.org/cgi-bin/carddisp.pl?gene=MIR335</a>     |
| KIF26B   | Kinesin Family Member 26B                                              | Protein coding | 36 | GC01P245154 | 1.300550103 | <a href="https://www.genecards.org/cgi-bin/carddisp.pl?gene=KIF26B">https://www.genecards.org/cgi-bin/carddisp.pl?gene=KIF26B</a>     |
| CTC1     | CST Telomere Replication Complex Component 1                           | Protein coding | 34 | GC17M009358 | 1.298761845 | <a href="https://www.genecards.org/cgi-bin/carddisp.pl?gene=CTC1">https://www.genecards.org/cgi-bin/carddisp.pl?gene=CTC1</a>         |
| ATP1A1   | ATPase Na <sup>+</sup> /K <sup>+</sup> Transporting Subunit $\alpha$ 1 | Protein coding | 50 | GC01P116372 | 1.29820919  | <a href="https://www.genecards.org/cgi-bin/carddisp.pl?gene=ATP1A1">https://www.genecards.org/cgi-bin/carddisp.pl?gene=ATP1A1</a>     |
| LGALS13  | Galectin 13                                                            | Protein coding | 38 | GC19P039602 | 1.29820919  | <a href="https://www.genecards.org/cgi-bin/carddisp.pl?gene=LGALS13">https://www.genecards.org/cgi-bin/carddisp.pl?gene=LGALS13</a>   |
| MOG      | Myelin Oligodendrocyte Glycoprotein                                    | Protein coding | 45 | GC06P058230 | 1.297759771 | <a href="https://www.genecards.org/cgi-bin/carddisp.pl?gene=MOG">https://www.genecards.org/cgi-bin/carddisp.pl?gene=MOG</a>           |
| PSMC3    | Proteasome 26S Subunit, ATPase 3                                       | Protein coding | 43 | GC11M071236 | 1.29484117  | <a href="https://www.genecards.org/cgi-bin/carddisp.pl?gene=PSMC3">https://www.genecards.org/cgi-bin/carddisp.pl?gene=PSMC3</a>       |
| SLC8A3   | Solute Carrier Family 8 Member A3                                      | Protein coding | 43 | GC14M070044 | 1.293664217 | <a href="https://www.genecards.org/cgi-bin/carddisp.pl?gene=SLC8A3">https://www.genecards.org/cgi-bin/carddisp.pl?gene=SLC8A3</a>     |
| NEDD4L   | NEDD4 Like E3 Ubiquitin Protein Ligase                                 | Protein coding | 47 | GC18P058044 | 1.292155027 | <a href="https://www.genecards.org/cgi-bin/carddisp.pl?gene=NEDD4L">https://www.genecards.org/cgi-bin/carddisp.pl?gene=NEDD4L</a>     |
| LGMN     | Legumain                                                               | Protein coding | 41 | GC14M092703 | 1.287123799 | <a href="https://www.genecards.org/cgi-bin/carddisp.pl?gene=LGMN">https://www.genecards.org/cgi-bin/carddisp.pl?gene=LGMN</a>         |

|             |                                                                |                |    |             |             |                                                                                                                                             |
|-------------|----------------------------------------------------------------|----------------|----|-------------|-------------|---------------------------------------------------------------------------------------------------------------------------------------------|
| SHH         | Sonic Hedgehog Signaling Molecule                              | Protein coding | 49 | GC07M155799 | 1.286102295 | <a href="https://www.genecards.org/cgi-bin/carddisp.pl?gene=SHH">https://www.genecards.org/cgi-bin/carddisp.pl?gene=SHH</a>                 |
| KLF2        | Kruppel Like Factor 2                                          | Protein coding | 41 | GC19P027749 | 1.284695864 | <a href="https://www.genecards.org/cgi-bin/carddisp.pl?gene=KLF2">https://www.genecards.org/cgi-bin/carddisp.pl?gene=KLF2</a>               |
| HCRT2       | Hypocretin Receptor 2                                          | Protein coding | 45 | GC06P055106 | 1.284265637 | <a href="https://www.genecards.org/cgi-bin/carddisp.pl?gene=HCRT2">https://www.genecards.org/cgi-bin/carddisp.pl?gene=HCRT2</a>             |
| DNMT1       | DNA Methyltransferase 1                                        | Protein coding | 51 | GC19M010133 | 1.28310132  | <a href="https://www.genecards.org/cgi-bin/carddisp.pl?gene=DNMT1">https://www.genecards.org/cgi-bin/carddisp.pl?gene=DNMT1</a>             |
| JUNB        | JunB Proto-Oncogene, AP-1 Transcription Factor Subunit         | Protein coding | 42 | GC19P012791 | 1.281659365 | <a href="https://www.genecards.org/cgi-bin/carddisp.pl?gene=JUNB">https://www.genecards.org/cgi-bin/carddisp.pl?gene=JUNB</a>               |
| MIR30B      | MicroRNA 30b                                                   | RNA gene       | 21 | GC08M134800 | 1.279249668 | <a href="https://www.genecards.org/cgi-bin/carddisp.pl?gene=MIR30B">https://www.genecards.org/cgi-bin/carddisp.pl?gene=MIR30B</a>           |
| CDK6        | Cyclin Dependent Kinase 6                                      | Protein coding | 53 | GC07M092604 | 1.278913736 | <a href="https://www.genecards.org/cgi-bin/carddisp.pl?gene=CDK6">https://www.genecards.org/cgi-bin/carddisp.pl?gene=CDK6</a>               |
| FANCC       | FA Complementation Group C                                     | Protein coding | 47 | GC09M095099 | 1.278913736 | <a href="https://www.genecards.org/cgi-bin/carddisp.pl?gene=FANCC">https://www.genecards.org/cgi-bin/carddisp.pl?gene=FANCC</a>             |
| CDKN2C      | Cyclin Dependent Kinase Inhibitor 2C                           | Protein coding | 45 | GC01P050960 | 1.278913736 | <a href="https://www.genecards.org/cgi-bin/carddisp.pl?gene=CDKN2C">https://www.genecards.org/cgi-bin/carddisp.pl?gene=CDKN2C</a>           |
| LATS2       | Large Tumor Suppressor Kinase 2                                | Protein coding | 45 | GC13M020973 | 1.278913736 | <a href="https://www.genecards.org/cgi-bin/carddisp.pl?gene=LATS2">https://www.genecards.org/cgi-bin/carddisp.pl?gene=LATS2</a>             |
| LRAT        | Lecithin Retinol Acyltransferase                               | Protein coding | 45 | GC04P154626 | 1.278913736 | <a href="https://www.genecards.org/cgi-bin/carddisp.pl?gene=LRAT">https://www.genecards.org/cgi-bin/carddisp.pl?gene=LRAT</a>               |
| DAB1        | DAB Adaptor Protein 1                                          | Protein coding | 44 | GC01M056994 | 1.278913736 | <a href="https://www.genecards.org/cgi-bin/carddisp.pl?gene=DAB1">https://www.genecards.org/cgi-bin/carddisp.pl?gene=DAB1</a>               |
| WNT2B       | Wnt Family Member 2B                                           | Protein coding | 44 | GC01P112466 | 1.278913736 | <a href="https://www.genecards.org/cgi-bin/carddisp.pl?gene=WNT2B">https://www.genecards.org/cgi-bin/carddisp.pl?gene=WNT2B</a>             |
| DGKG        | Diacylglycerol Kinase $\gamma$                                 | Protein coding | 43 | GC03M186105 | 1.278913736 | <a href="https://www.genecards.org/cgi-bin/carddisp.pl?gene=DGKG">https://www.genecards.org/cgi-bin/carddisp.pl?gene=DGKG</a>               |
| RXFP2       | Relaxin Family Peptide Receptor 2                              | Protein coding | 43 | GC13P031739 | 1.278913736 | <a href="https://www.genecards.org/cgi-bin/carddisp.pl?gene=RXFP2">https://www.genecards.org/cgi-bin/carddisp.pl?gene=RXFP2</a>             |
| RAD18       | RAD18 E3 Ubiquitin Protein Ligase                              | Protein coding | 42 | GC03M008775 | 1.278913736 | <a href="https://www.genecards.org/cgi-bin/carddisp.pl?gene=RAD18">https://www.genecards.org/cgi-bin/carddisp.pl?gene=RAD18</a>             |
| TSHB        | Thyroid Stimulating Hormone Subunit $\beta$                    | Protein coding | 42 | GC01P115029 | 1.278913736 | <a href="https://www.genecards.org/cgi-bin/carddisp.pl?gene=TSHB">https://www.genecards.org/cgi-bin/carddisp.pl?gene=TSHB</a>               |
| PTPRG       | Protein Tyrosine Phosphatase Receptor Type G                   | Protein coding | 42 | GC03P061561 | 1.278913736 | <a href="https://www.genecards.org/cgi-bin/carddisp.pl?gene=PTPRG">https://www.genecards.org/cgi-bin/carddisp.pl?gene=PTPRG</a>             |
| COX7A2L     | Cytochrome C Oxidase Subunit 7A2 Like                          | Protein coding | 41 | GC02M042312 | 1.278913736 | <a href="https://www.genecards.org/cgi-bin/carddisp.pl?gene=COX7A2L">https://www.genecards.org/cgi-bin/carddisp.pl?gene=COX7A2L</a>         |
| CRYGS       | Crystallin $\gamma$ S                                          | Protein coding | 40 | GC03M186538 | 1.278913736 | <a href="https://www.genecards.org/cgi-bin/carddisp.pl?gene=CRYGS">https://www.genecards.org/cgi-bin/carddisp.pl?gene=CRYGS</a>             |
| SC5D        | Sterol-C5-Desaturase                                           | Protein coding | 39 | GC11P121292 | 1.278913736 | <a href="https://www.genecards.org/cgi-bin/carddisp.pl?gene=SC5D">https://www.genecards.org/cgi-bin/carddisp.pl?gene=SC5D</a>               |
| EML4        | EMAP Like 4                                                    | Protein coding | 38 | GC02P042169 | 1.278913736 | <a href="https://www.genecards.org/cgi-bin/carddisp.pl?gene=EML4">https://www.genecards.org/cgi-bin/carddisp.pl?gene=EML4</a>               |
| GATAD1      | GATA Zinc Finger Domain Containing 1                           | Protein coding | 38 | GC07P092447 | 1.278913736 | <a href="https://www.genecards.org/cgi-bin/carddisp.pl?gene=GATAD1">https://www.genecards.org/cgi-bin/carddisp.pl?gene=GATAD1</a>           |
| KCNG3       | Potassium Voltage-Gated Channel Modifier Subfamily G Member 3  | Protein coding | 38 | GC02M042442 | 1.278913736 | <a href="https://www.genecards.org/cgi-bin/carddisp.pl?gene=KCNG3">https://www.genecards.org/cgi-bin/carddisp.pl?gene=KCNG3</a>             |
| TECTA       | Tectorin $\alpha$                                              | Protein coding | 38 | GC11P121101 | 1.278913736 | <a href="https://www.genecards.org/cgi-bin/carddisp.pl?gene=TECTA">https://www.genecards.org/cgi-bin/carddisp.pl?gene=TECTA</a>             |
| A1CF        | APOBEC1 Complementation Factor                                 | Protein coding | 37 | GC10M050799 | 1.278913736 | <a href="https://www.genecards.org/cgi-bin/carddisp.pl?gene=A1CF">https://www.genecards.org/cgi-bin/carddisp.pl?gene=A1CF</a>               |
| DDX31       | DEAD-Box Helicase 31                                           | Protein coding | 37 | GC09M132594 | 1.278913736 | <a href="https://www.genecards.org/cgi-bin/carddisp.pl?gene=DDX31">https://www.genecards.org/cgi-bin/carddisp.pl?gene=DDX31</a>             |
| CGNL1       | Cingulin Like 1                                                | Protein coding | 37 | GC15P057375 | 1.278913736 | <a href="https://www.genecards.org/cgi-bin/carddisp.pl?gene=CGNL1">https://www.genecards.org/cgi-bin/carddisp.pl?gene=CGNL1</a>             |
| PPFIBP2     | PPFIA Binding Protein 2                                        | Protein coding | 37 | GC11P007491 | 1.278913736 | <a href="https://www.genecards.org/cgi-bin/carddisp.pl?gene=PPFIBP2">https://www.genecards.org/cgi-bin/carddisp.pl?gene=PPFIBP2</a>         |
| TSPAN15     | Tetraspanin 15                                                 | Protein coding | 37 | GC10P069451 | 1.278913736 | <a href="https://www.genecards.org/cgi-bin/carddisp.pl?gene=TSPAN15">https://www.genecards.org/cgi-bin/carddisp.pl?gene=TSPAN15</a>         |
| ZNF354A     | Zinc Finger Protein 354A                                       | Protein coding | 37 | GC05M178711 | 1.278913736 | <a href="https://www.genecards.org/cgi-bin/carddisp.pl?gene=ZNF354A">https://www.genecards.org/cgi-bin/carddisp.pl?gene=ZNF354A</a>         |
| CNTNAP4     | Contactin Associated Protein Family Member 4                   | Protein coding | 36 | GC16P076278 | 1.278913736 | <a href="https://www.genecards.org/cgi-bin/carddisp.pl?gene=CNTNAP4">https://www.genecards.org/cgi-bin/carddisp.pl?gene=CNTNAP4</a>         |
| NAALADL2    | N-Acetylated $\alpha$ -Linked Acidic Dipeptidase Like 2        | Protein coding | 36 | GC03P174438 | 1.278913736 | <a href="https://www.genecards.org/cgi-bin/carddisp.pl?gene=NAALADL2">https://www.genecards.org/cgi-bin/carddisp.pl?gene=NAALADL2</a>       |
| TMEM14C     | Transmembrane Protein 14C                                      | Protein coding | 36 | GC06P010723 | 1.278913736 | <a href="https://www.genecards.org/cgi-bin/carddisp.pl?gene=TMEM14C">https://www.genecards.org/cgi-bin/carddisp.pl?gene=TMEM14C</a>         |
| SYT9        | Synaptotagmin 9                                                | Protein coding | 36 | GC11P007238 | 1.278913736 | <a href="https://www.genecards.org/cgi-bin/carddisp.pl?gene=SYT9">https://www.genecards.org/cgi-bin/carddisp.pl?gene=SYT9</a>               |
| LRCH1       | Leucine Rich Repeats And Calponin Homology Domain Containing 1 | Protein coding | 35 | GC13P046553 | 1.278913736 | <a href="https://www.genecards.org/cgi-bin/carddisp.pl?gene=LRCH1">https://www.genecards.org/cgi-bin/carddisp.pl?gene=LRCH1</a>             |
| DMRTA2      | DMRT Like Family A2                                            | Protein coding | 34 | GC01M050417 | 1.278913736 | <a href="https://www.genecards.org/cgi-bin/carddisp.pl?gene=DMRTA2">https://www.genecards.org/cgi-bin/carddisp.pl?gene=DMRTA2</a>           |
| LHFPL3      | LHFPL Tetraspan Subfamily Member 3                             | Protein coding | 34 | GC07P104328 | 1.278913736 | <a href="https://www.genecards.org/cgi-bin/carddisp.pl?gene=LHFPL3">https://www.genecards.org/cgi-bin/carddisp.pl?gene=LHFPL3</a>           |
| PHACTR2     | Phosphatase And Actin Regulator 2                              | Protein coding | 34 | GC06P143536 | 1.278913736 | <a href="https://www.genecards.org/cgi-bin/carddisp.pl?gene=PHACTR2">https://www.genecards.org/cgi-bin/carddisp.pl?gene=PHACTR2</a>         |
| THUMPD3     | THUMP Domain Containing 3                                      | Protein coding | 34 | GC03P009362 | 1.278913736 | <a href="https://www.genecards.org/cgi-bin/carddisp.pl?gene=THUMPD3">https://www.genecards.org/cgi-bin/carddisp.pl?gene=THUMPD3</a>         |
| CACFD1      | Calcium Channel Flower Domain Containing 1                     | Protein coding | 33 | GC09P133459 | 1.278913736 | <a href="https://www.genecards.org/cgi-bin/carddisp.pl?gene=CACFD1">https://www.genecards.org/cgi-bin/carddisp.pl?gene=CACFD1</a>           |
| SLC35F6     | Solute Carrier Family 35 Member F6                             | Protein coding | 33 | GC02P026764 | 1.278913736 | <a href="https://www.genecards.org/cgi-bin/carddisp.pl?gene=SLC35F6">https://www.genecards.org/cgi-bin/carddisp.pl?gene=SLC35F6</a>         |
| SRRM4       | Serine/Arginine Repetitive Matrix 4                            | Protein coding | 33 | GC12P118981 | 1.278913736 | <a href="https://www.genecards.org/cgi-bin/carddisp.pl?gene=SRRM4">https://www.genecards.org/cgi-bin/carddisp.pl?gene=SRRM4</a>             |
| ZNF354B     | Zinc Finger Protein 354B                                       | Protein coding | 33 | GC05P178859 | 1.278913736 | <a href="https://www.genecards.org/cgi-bin/carddisp.pl?gene=ZNF354B">https://www.genecards.org/cgi-bin/carddisp.pl?gene=ZNF354B</a>         |
| ASPHD2      | Aspartate $\beta$ -Hydroxylase Domain Containing 2             | Protein coding | 32 | GC22P026429 | 1.278913736 | <a href="https://www.genecards.org/cgi-bin/carddisp.pl?gene=ASPHD2">https://www.genecards.org/cgi-bin/carddisp.pl?gene=ASPHD2</a>           |
| OLFML1      | Olfactomedin Like 1                                            | Protein coding | 32 | GC11P007485 | 1.278913736 | <a href="https://www.genecards.org/cgi-bin/carddisp.pl?gene=OLFML1">https://www.genecards.org/cgi-bin/carddisp.pl?gene=OLFML1</a>           |
| CIB4        | Calcium And Integrin Binding Family Member 4                   | Protein coding | 31 | GC02M026573 | 1.278913736 | <a href="https://www.genecards.org/cgi-bin/carddisp.pl?gene=CIB4">https://www.genecards.org/cgi-bin/carddisp.pl?gene=CIB4</a>               |
| LTV1        | LTV1 Ribosome Biogenesis Factor                                | Protein coding | 31 | GC06P143843 | 1.278913736 | <a href="https://www.genecards.org/cgi-bin/carddisp.pl?gene=LTV1">https://www.genecards.org/cgi-bin/carddisp.pl?gene=LTV1</a>               |
| FAM133B     | Family With Sequence Similarity 133 Member B                   | Protein coding | 30 | GC07M092560 | 1.278913736 | <a href="https://www.genecards.org/cgi-bin/carddisp.pl?gene=FAM133B">https://www.genecards.org/cgi-bin/carddisp.pl?gene=FAM133B</a>         |
| ADTRP       | Androgen Dependent TFPI Regulating Protein                     | Protein coding | 29 | GC06M011712 | 1.278913736 | <a href="https://www.genecards.org/cgi-bin/carddisp.pl?gene=ADTRP">https://www.genecards.org/cgi-bin/carddisp.pl?gene=ADTRP</a>             |
| MRPL57      | Mitochondrial Ribosomal Protein L57                            | Protein coding | 29 | GC13P021176 | 1.278913736 | <a href="https://www.genecards.org/cgi-bin/carddisp.pl?gene=MRPL57">https://www.genecards.org/cgi-bin/carddisp.pl?gene=MRPL57</a>           |
| ZNF354C     | Zinc Finger Protein 354C                                       | Protein coding | 29 | GC05P179060 | 1.278913736 | <a href="https://www.genecards.org/cgi-bin/carddisp.pl?gene=ZNF354C">https://www.genecards.org/cgi-bin/carddisp.pl?gene=ZNF354C</a>         |
| ZC2HC1B     | Zinc Finger C2HC-Type Containing 1B                            | Protein coding | 29 | GC06P143865 | 1.278913736 | <a href="https://www.genecards.org/cgi-bin/carddisp.pl?gene=ZC2HC1B">https://www.genecards.org/cgi-bin/carddisp.pl?gene=ZC2HC1B</a>         |
| MEDAG       | Mesenteric Estrogen Dependent Adipogenesis                     | Protein coding | 27 | GC13P030906 | 1.278913736 | <a href="https://www.genecards.org/cgi-bin/carddisp.pl?gene=MEDAG">https://www.genecards.org/cgi-bin/carddisp.pl?gene=MEDAG</a>             |
| FAM170B     | Family With Sequence Similarity 170 Member B                   | Protein coding | 26 | GC10M049131 | 1.278913736 | <a href="https://www.genecards.org/cgi-bin/carddisp.pl?gene=FAM170B">https://www.genecards.org/cgi-bin/carddisp.pl?gene=FAM170B</a>         |
| TMEM170B    | Transmembrane Protein 170B                                     | Protein coding | 26 | GC06P011537 | 1.278913736 | <a href="https://www.genecards.org/cgi-bin/carddisp.pl?gene=TMEM170B">https://www.genecards.org/cgi-bin/carddisp.pl?gene=TMEM170B</a>       |
| ZNF879      | Zinc Finger Protein 879                                        | Protein coding | 25 | GC05P179023 | 1.278913736 | <a href="https://www.genecards.org/cgi-bin/carddisp.pl?gene=ZNF879">https://www.genecards.org/cgi-bin/carddisp.pl?gene=ZNF879</a>           |
| TEX26       | Testis Expressed 26                                            | Protein coding | 24 | GC13P030932 | 1.278913736 | <a href="https://www.genecards.org/cgi-bin/carddisp.pl?gene=TEX26">https://www.genecards.org/cgi-bin/carddisp.pl?gene=TEX26</a>             |
| C1orf185    | Chromosome 1 Open Reading Frame 185                            | Protein coding | 23 | GC01P051102 | 1.278913736 | <a href="https://www.genecards.org/cgi-bin/carddisp.pl?gene=C1orf185">https://www.genecards.org/cgi-bin/carddisp.pl?gene=C1orf185</a>       |
| TMEM273     | Transmembrane Protein 273                                      | Protein coding | 22 | GC10M049155 | 1.278913736 | <a href="https://www.genecards.org/cgi-bin/carddisp.pl?gene=TMEM273">https://www.genecards.org/cgi-bin/carddisp.pl?gene=TMEM273</a>         |
| TRA         | T Cell Receptor $\alpha$ Locus                                 | Protein coding | 19 | GC14P021621 | 1.278913736 | <a href="https://www.genecards.org/cgi-bin/carddisp.pl?gene=TRA">https://www.genecards.org/cgi-bin/carddisp.pl?gene=TRA</a>                 |
| LINC00545   | Long Intergenic Non-Protein Coding RNA 545                     | RNA gene       | 15 | GC13P030830 | 1.278913736 | <a href="https://www.genecards.org/cgi-bin/carddisp.pl?gene=LINC00545">https://www.genecards.org/cgi-bin/carddisp.pl?gene=LINC00545</a>     |
| TEX26-AS1   | TEX26 Antisense RNA 1                                          | RNA gene       | 15 | GC13M030881 | 1.278913736 | <a href="https://www.genecards.org/cgi-bin/carddisp.pl?gene=TEX26-AS1">https://www.genecards.org/cgi-bin/carddisp.pl?gene=TEX26-AS1</a>     |
| LINC00462   | Long Intergenic Non-Protein Coding RNA 462                     | RNA gene       | 14 | GC13M048576 | 1.278913736 | <a href="https://www.genecards.org/cgi-bin/carddisp.pl?gene=LINC00462">https://www.genecards.org/cgi-bin/carddisp.pl?gene=LINC00462</a>     |
| FAM170B-AS1 | FAM170B Antisense RNA 1                                        | RNA gene       | 13 | GC10P049121 | 1.278913736 | <a href="https://www.genecards.org/cgi-bin/carddisp.pl?gene=FAM170B-AS1">https://www.genecards.org/cgi-bin/carddisp.pl?gene=FAM170B-AS1</a> |
| LINC00398   | Long Intergenic Non-Protein Coding RNA 398                     | RNA gene       | 13 | GC13P030803 | 1.278913736 | <a href="https://www.genecards.org/cgi-bin/carddisp.pl?gene=LINC00398">https://www.genecards.org/cgi-bin/carddisp.pl?gene=LINC00398</a>     |
| AACSP1      | Acetoacetyl-CoA Synthetase Pseudogene 1                        | Pseudogene     | 12 | GC05M178764 | 1.278913736 | <a href="https://www.genecards.org/cgi-bin/carddisp.pl?gene=AACSP1">https://www.genecards.org/cgi-bin/carddisp.pl?gene=AACSP1</a>           |
| CRYBB2P1    | Crystallin $\beta$ B2 Pseudogene 1                             | Pseudogene     | 12 | GC22P025448 | 1.278913736 | <a href="https://www.genecards.org/cgi-bin/carddisp.pl?gene=CRYBB2P1">https://www.genecards.org/cgi-bin/carddisp.pl?gene=CRYBB2P1</a>       |
| LINC01435   | Long Intergenic Non-Protein Coding RNA 1435                    | RNA gene       | 12 | GC10M107694 | 1.278913736 | <a href="https://www.genecards.org/cgi-bin/carddisp.pl?gene=LINC01435">https://www.genecards.org/cgi-bin/carddisp.pl?gene=LINC01435</a>     |
| CDK6-AS1    | CDK6 Antisense RNA 1                                           | RNA gene       | 11 | GC07P092837 | 1.278913736 | <a href="https://www.genecards.org/cgi-bin/carddisp.pl?gene=CDK6-AS1">https://www.genecards.org/cgi-bin/carddisp.pl?gene=CDK6-AS1</a>       |
| MIR548AD    | MicroRNA 548ad                                                 | RNA gene       | 11 | GC02P035516 | 1.278913736 | <a href="https://www.genecards.org/cgi-bin/carddisp.pl?gene=MIR548AD">https://www.genecards.org/cgi-bin/carddisp.pl?gene=MIR548AD</a>       |
| MIPEPP3     | Mitochondrial Intermediate Peptidase Pseudogene 3              | Pseudogene     | 11 | GC13P021298 | 1.278913736 | <a href="https://www.genecards.org/cgi-bin/carddisp.pl?gene=MIPEPP3">https://www.genecards.org/cgi-bin/carddisp.pl?gene=MIPEPP3</a>         |
| MIR297      | MicroRNA 297                                                   | RNA gene       | 11 | GC04M110860 | 1.278913736 | <a href="https://www.genecards.org/cgi-bin/carddisp.pl?gene=MIR297">https://www.genecards.org/cgi-bin/carddisp.pl?gene=MIR297</a>           |
| MIR3156-3   | MicroRNA 3156-3                                                | RNA gene       | 11 | GC21M013406 | 1.278913736 | <a href="https://www.genecards.org/cgi-bin/carddisp.pl?gene=MIR3156-3">https://www.genecards.org/cgi-bin/carddisp.pl?gene=MIR3156-3</a>     |
| PHACTR2-AS1 | PHACTR2 Antisense RNA 1                                        | RNA gene       | 11 | GC06M143555 | 1.278913736 | <a href="https://www.genecards.org/cgi-bin/carddisp.pl?gene=PHACTR2-AS1">https://www.genecards.org/cgi-bin/carddisp.pl?gene=PHACTR2-AS1</a> |
| LINC02052   | Long Intergenic Non-Protein Coding RNA 2052                    | RNA gene       | 10 | GC03M186455 | 1.278913736 | <a href="https://www.genecards.org/cgi-bin/carddisp.pl?gene=LINC02052">https://www.genecards.org/cgi-bin/carddisp.pl?gene=LINC02052</a>     |

|                   |                                                                    |                |   |             |             |                                                                      |
|-------------------|--------------------------------------------------------------------|----------------|---|-------------|-------------|----------------------------------------------------------------------|
| LINC01657         | Long Intergenic Non-Protein Coding RNA 1657                        | RNA gene       | 9 | GC01P175878 | 1.278913736 | https://www.genecards.org/cgi-bin/carddisp.pl?gene=LINC01657         |
| TBCEL-TECTA       | TBCEL-TECTA Readthrough                                            | Protein coding | 9 | GC11P121026 | 1.278913736 | https://www.genecards.org/cgi-bin/carddisp.pl?gene=TBCEL-TECTA       |
| SRGAP3-AS1        | SRGAP3 Antisense RNA 1                                             | RNA gene       | 9 | GC03P009056 | 1.278913736 | https://www.genecards.org/cgi-bin/carddisp.pl?gene=SRGAP3-AS1        |
| THRAP3P1          | THRAP3 Pseudogene 1                                                | Pseudogene     | 9 | GC03P031452 | 1.278913736 | https://www.genecards.org/cgi-bin/carddisp.pl?gene=THRAP3P1          |
| LINC01765         | Long Intergenic Non-Protein Coding RNA 1765                        | RNA gene       | 8 | GC01P115101 | 1.278913736 | https://www.genecards.org/cgi-bin/carddisp.pl?gene=LINC01765         |
| RPS3AP5           | RPS3A Pseudogene 5                                                 | Pseudogene     | 8 | GC10P084560 | 1.278913736 | https://www.genecards.org/cgi-bin/carddisp.pl?gene=RPS3AP5           |
| UBE2L2            | Ubiquitin Conjugating Enzyme E2 L2 (Pseudogene)                    | Pseudogene     | 8 | GC12M020449 | 1.278913736 | https://www.genecards.org/cgi-bin/carddisp.pl?gene=UBE2L2            |
| RPS12P23          | Ribosomal Protein S12 Pseudogene 23                                | Pseudogene     | 8 | GC13M021094 | 1.278913736 | https://www.genecards.org/cgi-bin/carddisp.pl?gene=RPS12P23          |
| ENSG00000197099   | Novel Transcript, Antisense To KNG1, HRG, FETUB, AHSB And DNAJB11  | RNA gene       | 8 | GC03M186580 | 1.278913736 | https://www.genecards.org/cgi-bin/carddisp.pl?gene=ENSG00000197099   |
| RNU6-667P         | RNA, U6 Small Nuclear 667, Pseudogene                              | Pseudogene     | 7 | GC15M079817 | 1.278913736 | https://www.genecards.org/cgi-bin/carddisp.pl?gene=RNU6-667P         |
| STARP1            | Steroidogenic Acute Regulatory Protein Pseudogene 1                | Pseudogene     | 7 | GC13M065280 | 1.278913736 | https://www.genecards.org/cgi-bin/carddisp.pl?gene=STARP1            |
| RN7SL363P         | RNA, 7SL, Cytoplasmic 363, Pseudogene                              | Pseudogene     | 7 | GC15M090855 | 1.278913736 | https://www.genecards.org/cgi-bin/carddisp.pl?gene=RN7SL363P         |
| ENSG00000250999   | Novel Transcript                                                   | Uncategorized  | 7 | GC05P179657 | 1.278913736 | https://www.genecards.org/cgi-bin/carddisp.pl?gene=ENSG00000250999   |
| ENSG00000225378   | Novel Transcript                                                   | RNA gene       | 7 | GC02M026671 | 1.278913736 | https://www.genecards.org/cgi-bin/carddisp.pl?gene=ENSG00000225378   |
| ENSG00000266993   | Novel Transcript, Antisense To NRD1                                | RNA gene       | 7 | GC01P051793 | 1.278913736 | https://www.genecards.org/cgi-bin/carddisp.pl?gene=ENSG00000266993   |
| ESRRAP2           | Estrogen-Related Receptor $\alpha$ Pseudogene 2                    | Pseudogene     | 6 | GC13P021260 | 1.278913736 | https://www.genecards.org/cgi-bin/carddisp.pl?gene=ESRRAP2           |
| GTF2IP2           | General Transcription Factor Ili Pseudogene 2                      | Pseudogene     | 6 | GC21M013443 | 1.278913736 | https://www.genecards.org/cgi-bin/carddisp.pl?gene=GTF2IP2           |
| LGMNP1            | Legumain Pseudogene 1                                              | Pseudogene     | 6 | GC13M064957 | 1.278913736 | https://www.genecards.org/cgi-bin/carddisp.pl?gene=LGMNP1            |
| PPIAP22           | Peptidylprolyl Isomerase A Pseudogene 22                           | Pseudogene     | 6 | GC21P018857 | 1.278913736 | https://www.genecards.org/cgi-bin/carddisp.pl?gene=PPIAP22           |
| LOC105372028      | Uncharacterized LOC105372028                                       | RNA gene       | 6 | GC18P024716 | 1.278913736 | https://www.genecards.org/cgi-bin/carddisp.pl?gene=LOC105372028      |
| ENSG00000271897   | Novel Transcript                                                   | RNA gene       | 6 | GC06P011607 | 1.278913736 | https://www.genecards.org/cgi-bin/carddisp.pl?gene=ENSG00000271897   |
| BOLA3P1           | BolA Family Member 3 Pseudogene 1                                  | Pseudogene     | 5 | GC11P102880 | 1.278913736 | https://www.genecards.org/cgi-bin/carddisp.pl?gene=BOLA3P1           |
| GAPDHP50          | Glyceraldehyde 3 Phosphate Dehydrogenase Pseudogene 50             | Pseudogene     | 5 | GC03M089097 | 1.278913736 | https://www.genecards.org/cgi-bin/carddisp.pl?gene=GAPDHP50          |
| ICE2P2            | Interactor Of Little Elongation Complex ELL Subunit 2 Pseudogene 2 | Pseudogene     | 5 | GC03P088948 | 1.278913736 | https://www.genecards.org/cgi-bin/carddisp.pl?gene=ICE2P2            |
| RNU7-159P         | RNA, U7 Small Nuclear 159 Pseudogene                               | Pseudogene     | 5 | GC11M102903 | 1.278913736 | https://www.genecards.org/cgi-bin/carddisp.pl?gene=RNU7-159P         |
| RCN1P1            | Reticulocalbin 1 Pseudogene 1                                      | Pseudogene     | 5 | GC06M087121 | 1.278913736 | https://www.genecards.org/cgi-bin/carddisp.pl?gene=RCN1P1            |
| HSALNG0070397     |                                                                    | RNA gene       | 5 | GC09P022019 | 1.278913736 | https://www.genecards.org/cgi-bin/carddisp.pl?gene=HSALNG0070397     |
| ENSG00000287593   | Novel Transcript, Antisense To ADTRP                               | RNA gene       | 5 | GC06P011594 | 1.278913736 | https://www.genecards.org/cgi-bin/carddisp.pl?gene=ENSG00000287593   |
| lnc-ALDH1A2-9     |                                                                    | RNA gene       | 5 | GC15M068748 | 1.278913736 | https://www.genecards.org/cgi-bin/carddisp.pl?gene=lnc-ALDH1A2-9     |
| MIR378G-002       |                                                                    | RNA gene       | 5 | GC02M026696 | 1.278913736 | https://www.genecards.org/cgi-bin/carddisp.pl?gene=MIR378G-002       |
| ENSG00000257065   | Novel Protein                                                      | Protein coding | 5 | GC06P143807 | 1.278913736 | https://www.genecards.org/cgi-bin/carddisp.pl?gene=ENSG00000257065   |
| ATP5MC1P8         | ATP Synthase Membrane Subunit C Locus 1 Pseudogene 8               | Pseudogene     | 4 | GC10P076837 | 1.278913736 | https://www.genecards.org/cgi-bin/carddisp.pl?gene=ATP5MC1P8         |
| NDUFB10P1         | NADH:Ubiquinone Oxidoreductase Subunit B10 Pseudogene 1            | Pseudogene     | 4 | GC15M068744 | 1.278913736 | https://www.genecards.org/cgi-bin/carddisp.pl?gene=NDUFB10P1         |
| HSALNG0006261     |                                                                    | RNA gene       | 4 | GC01M115116 | 1.278913736 | https://www.genecards.org/cgi-bin/carddisp.pl?gene=HSALNG0006261     |
| HSALNG0113824     |                                                                    | RNA gene       | 4 | GC17P001622 | 1.278913736 | https://www.genecards.org/cgi-bin/carddisp.pl?gene=HSALNG0113824     |
| lnc-ABO-33        |                                                                    | RNA gene       | 4 | GC09M133232 | 1.278913736 | https://www.genecards.org/cgi-bin/carddisp.pl?gene=lnc-ABO-33        |
| lnc-ZFP2-1        |                                                                    | RNA gene       | 4 | GC05P178680 | 1.278913736 | https://www.genecards.org/cgi-bin/carddisp.pl?gene=lnc-ZFP2-1        |
| lnc-FAM170B-1     |                                                                    | RNA gene       | 4 | GC10M049156 | 1.278913736 | https://www.genecards.org/cgi-bin/carddisp.pl?gene=lnc-FAM170B-1     |
| lnc-FURIN-3       |                                                                    | RNA gene       | 4 | GC15P090862 | 1.278913736 | https://www.genecards.org/cgi-bin/carddisp.pl?gene=lnc-FURIN-3       |
| lnc-MTAP-3        |                                                                    | RNA gene       | 4 | GC09P022103 | 1.278913736 | https://www.genecards.org/cgi-bin/carddisp.pl?gene=lnc-MTAP-3        |
| HSALNG0089738     |                                                                    | RNA gene       | 4 | GC12M020370 | 1.278913736 | https://www.genecards.org/cgi-bin/carddisp.pl?gene=HSALNG0089738     |
| HSALNG0096147     |                                                                    | RNA gene       | 4 | GC13P030865 | 1.278913736 | https://www.genecards.org/cgi-bin/carddisp.pl?gene=HSALNG0096147     |
| lnc-CDKN2C-1      |                                                                    | RNA gene       | 4 | GC01P050977 | 1.278913736 | https://www.genecards.org/cgi-bin/carddisp.pl?gene=lnc-CDKN2C-1      |
| lnc-FAM133B-2     |                                                                    | RNA gene       | 4 | GC07M092611 | 1.278913736 | https://www.genecards.org/cgi-bin/carddisp.pl?gene=lnc-FAM133B-2     |
| lnc-TMEM170B-5    |                                                                    | RNA gene       | 4 | GC06P011586 | 1.278913736 | https://www.genecards.org/cgi-bin/carddisp.pl?gene=lnc-TMEM170B-5    |
| RF00017-1273      |                                                                    | RNA gene       | 4 | GC13M030955 | 1.278913736 | https://www.genecards.org/cgi-bin/carddisp.pl?gene=RF00017-1273      |
| NONHSAG020469.2   |                                                                    | RNA gene       | 4 | GC17P001621 | 1.278913736 | https://www.genecards.org/cgi-bin/carddisp.pl?gene=NONHSAG020469.2   |
| RF00017-4863      |                                                                    | RNA gene       | 4 | GC06M011591 | 1.278913736 | https://www.genecards.org/cgi-bin/carddisp.pl?gene=RF00017-4863      |
| MTND4P33          | MT-ND4 Pseudogene 33                                               | Pseudogene     | 3 | GC14P084269 | 1.278913736 | https://www.genecards.org/cgi-bin/carddisp.pl?gene=MTND4P33          |
| MIX23P2           | MIX23 Pseudogene 2                                                 | Pseudogene     | 3 | GC10M050972 | 1.278913736 | https://www.genecards.org/cgi-bin/carddisp.pl?gene=MIX23P2           |
| HSALNG0013736     |                                                                    | RNA gene       | 3 | GC02P026693 | 1.278913736 | https://www.genecards.org/cgi-bin/carddisp.pl?gene=HSALNG0013736     |
| HSALNG0003544     |                                                                    | RNA gene       | 3 | GC01M050975 | 1.278913736 | https://www.genecards.org/cgi-bin/carddisp.pl?gene=HSALNG0003544     |
| HSALNG0106222     |                                                                    | RNA gene       | 3 | GC15P058259 | 1.278913736 | https://www.genecards.org/cgi-bin/carddisp.pl?gene=HSALNG0106222     |
| HSALNG0108163     |                                                                    | RNA gene       | 3 | GC15P090863 | 1.278913736 | https://www.genecards.org/cgi-bin/carddisp.pl?gene=HSALNG0108163     |
| HSALNG0108164-001 |                                                                    | RNA gene       | 3 | GC15M090866 | 1.278913736 | https://www.genecards.org/cgi-bin/carddisp.pl?gene=HSALNG0108164-001 |
| lnc-COX7A2L-1     |                                                                    | RNA gene       | 3 | GC02M042365 | 1.278913736 | https://www.genecards.org/cgi-bin/carddisp.pl?gene=lnc-COX7A2L-1     |
| lnc-AQP9-4        |                                                                    | RNA gene       | 3 | GC15P058266 | 1.278913736 | https://www.genecards.org/cgi-bin/carddisp.pl?gene=lnc-AQP9-4        |
| HSALNG0048081     |                                                                    | RNA gene       | 3 | GC06M011624 | 1.278913736 | https://www.genecards.org/cgi-bin/carddisp.pl?gene=HSALNG0048081     |
| HSALNG0048080-001 |                                                                    | RNA gene       | 3 | GC06P011587 | 1.278913736 | https://www.genecards.org/cgi-bin/carddisp.pl?gene=HSALNG0048080-001 |
| HSALNG0108164-002 |                                                                    | RNA gene       | 3 | GC15M090871 | 1.278913736 | https://www.genecards.org/cgi-bin/carddisp.pl?gene=HSALNG0108164-002 |
| piR-44878-030     |                                                                    | RNA gene       | 3 | GC06M143741 | 1.278913736 | https://www.genecards.org/cgi-bin/carddisp.pl?gene=piR-44878-030     |
| lnc-EML4-10       |                                                                    | RNA gene       | 3 | GC02P042361 | 1.278913736 | https://www.genecards.org/cgi-bin/carddisp.pl?gene=lnc-EML4-10       |
| lnc-FANCC-4       |                                                                    | RNA gene       | 3 | GC09M095443 | 1.278913736 | https://www.genecards.org/cgi-bin/carddisp.pl?gene=lnc-FANCC-4       |
| piR-45932-090     |                                                                    | RNA gene       | 3 | GC06P143802 | 1.278913736 | https://www.genecards.org/cgi-bin/carddisp.pl?gene=piR-45932-090     |
| piR-59515-001     |                                                                    | RNA gene       | 3 | GC10M069488 | 1.278913736 | https://www.genecards.org/cgi-bin/carddisp.pl?gene=piR-59515-001     |
| piR-59907-030     |                                                                    | RNA gene       | 3 | GC09M133272 | 1.278913736 | https://www.genecards.org/cgi-bin/carddisp.pl?gene=piR-59907-030     |
| HSALNG0077864-002 |                                                                    | RNA gene       | 3 | GC10P049137 | 1.278913736 | https://www.genecards.org/cgi-bin/carddisp.pl?gene=HSALNG0077864-002 |
| lnc-CTTNBP2NL-4   |                                                                    | RNA gene       | 3 | GC01P112499 | 1.278913736 | https://www.genecards.org/cgi-bin/carddisp.pl?gene=lnc-CTTNBP2NL-4   |
| RF00017-5985      |                                                                    | RNA gene       | 3 | GC07P092604 | 1.278913736 | https://www.genecards.org/cgi-bin/carddisp.pl?gene=RF00017-5985      |
| RF01016-016       |                                                                    | RNA gene       | 3 | GC07M092631 | 1.278913736 | https://www.genecards.org/cgi-bin/carddisp.pl?gene=RF01016-016       |
| TARDBPP5          | TARDBP Pseudogene 5                                                | RNA gene       | 2 | GC06M102407 | 1.278913736 | https://www.genecards.org/cgi-bin/carddisp.pl?gene=TARDBPP5          |

|                 |                                                             |                |    |             |             |                                                                                                                                                     |
|-----------------|-------------------------------------------------------------|----------------|----|-------------|-------------|-----------------------------------------------------------------------------------------------------------------------------------------------------|
| HSALNG0024006   |                                                             | RNA gene       | 2  | GC03P009074 | 1.278913736 | <a href="https://www.genecards.org/cgi-bin/carddisp.pl?gene=HSALNG0024006">https://www.genecards.org/cgi-bin/carddisp.pl?gene=HSALNG0024006</a>     |
| HSALNG0123985   |                                                             | RNA gene       | 2  | GC19M011062 | 1.278913736 | <a href="https://www.genecards.org/cgi-bin/carddisp.pl?gene=HSALNG0123985">https://www.genecards.org/cgi-bin/carddisp.pl?gene=HSALNG0123985</a>     |
| HSALNG0113827   |                                                             | RNA gene       | 2  | GC17M001672 | 1.278913736 | <a href="https://www.genecards.org/cgi-bin/carddisp.pl?gene=HSALNG0113827">https://www.genecards.org/cgi-bin/carddisp.pl?gene=HSALNG0113827</a>     |
| piR-40216-002   |                                                             | RNA gene       | 2  | GC05M178792 | 1.278913736 | <a href="https://www.genecards.org/cgi-bin/carddisp.pl?gene=piR-40216-002">https://www.genecards.org/cgi-bin/carddisp.pl?gene=piR-40216-002</a>     |
| piR-51980       |                                                             | RNA gene       | 2  | GC17M001768 | 1.278913736 | <a href="https://www.genecards.org/cgi-bin/carddisp.pl?gene=piR-51980">https://www.genecards.org/cgi-bin/carddisp.pl?gene=piR-51980</a>             |
| lnc-KRTAP12-4-1 |                                                             | RNA gene       | 2  | GC21M048707 | 1.278913736 | <a href="https://www.genecards.org/cgi-bin/carddisp.pl?gene=lnc-KRTAP12-4-1">https://www.genecards.org/cgi-bin/carddisp.pl?gene=lnc-KRTAP12-4-1</a> |
| piR-39341-075   |                                                             | RNA gene       | 2  | GC11P121176 | 1.278913736 | <a href="https://www.genecards.org/cgi-bin/carddisp.pl?gene=piR-39341-075">https://www.genecards.org/cgi-bin/carddisp.pl?gene=piR-39341-075</a>     |
| piR-49334       |                                                             | RNA gene       | 2  | GC05M178789 | 1.278913736 | <a href="https://www.genecards.org/cgi-bin/carddisp.pl?gene=piR-49334">https://www.genecards.org/cgi-bin/carddisp.pl?gene=piR-49334</a>             |
| piR-58579       |                                                             | RNA gene       | 2  | GC02M042388 | 1.278913736 | <a href="https://www.genecards.org/cgi-bin/carddisp.pl?gene=piR-58579">https://www.genecards.org/cgi-bin/carddisp.pl?gene=piR-58579</a>             |
| piR-31534-476   |                                                             | RNA gene       | 2  | GC03M009085 | 1.278913736 | <a href="https://www.genecards.org/cgi-bin/carddisp.pl?gene=piR-31534-476">https://www.genecards.org/cgi-bin/carddisp.pl?gene=piR-31534-476</a>     |
| HSALNG0003920   |                                                             | RNA gene       | 1  | GC01P058266 | 1.278913736 | <a href="https://www.genecards.org/cgi-bin/carddisp.pl?gene=HSALNG0003920">https://www.genecards.org/cgi-bin/carddisp.pl?gene=HSALNG0003920</a>     |
| HSALNG0003921   |                                                             | RNA gene       | 1  | GC01M058275 | 1.278913736 | <a href="https://www.genecards.org/cgi-bin/carddisp.pl?gene=HSALNG0003921">https://www.genecards.org/cgi-bin/carddisp.pl?gene=HSALNG0003921</a>     |
| HSALNG0003922   |                                                             | RNA gene       | 1  | GC01P058320 | 1.278913736 | <a href="https://www.genecards.org/cgi-bin/carddisp.pl?gene=HSALNG0003922">https://www.genecards.org/cgi-bin/carddisp.pl?gene=HSALNG0003922</a>     |
| HSALNG0123953   |                                                             | RNA gene       | 1  | GC19P010683 | 1.278913736 | <a href="https://www.genecards.org/cgi-bin/carddisp.pl?gene=HSALNG0123953">https://www.genecards.org/cgi-bin/carddisp.pl?gene=HSALNG0123953</a>     |
| piR-45012-007   |                                                             | RNA gene       | 1  | GC01P058274 | 1.278913736 | <a href="https://www.genecards.org/cgi-bin/carddisp.pl?gene=piR-45012-007">https://www.genecards.org/cgi-bin/carddisp.pl?gene=piR-45012-007</a>     |
| DDIT3           | DNA Damage Inducible Transcript 3                           | Protein coding | 45 | GC12M057516 | 1.277679205 | <a href="https://www.genecards.org/cgi-bin/carddisp.pl?gene=DDIT3">https://www.genecards.org/cgi-bin/carddisp.pl?gene=DDIT3</a>                     |
| TNKS            | Tankyrase                                                   | Protein coding | 44 | GC08P009555 | 1.275541782 | <a href="https://www.genecards.org/cgi-bin/carddisp.pl?gene=TNKS">https://www.genecards.org/cgi-bin/carddisp.pl?gene=TNKS</a>                       |
| KLF15           | Kruppel Like Factor 15                                      | Protein coding | 41 | GC03M126293 | 1.274571538 | <a href="https://www.genecards.org/cgi-bin/carddisp.pl?gene=KLF15">https://www.genecards.org/cgi-bin/carddisp.pl?gene=KLF15</a>                     |
| CPT1A           | Carnitine Palmitoyltransferase 1A                           | Protein coding | 49 | GC11M068754 | 1.274211287 | <a href="https://www.genecards.org/cgi-bin/carddisp.pl?gene=CPT1A">https://www.genecards.org/cgi-bin/carddisp.pl?gene=CPT1A</a>                     |
| RFC1            | Replication Factor C Subunit 1                              | Protein coding | 47 | GC04M039291 | 1.273358226 | <a href="https://www.genecards.org/cgi-bin/carddisp.pl?gene=RFC1">https://www.genecards.org/cgi-bin/carddisp.pl?gene=RFC1</a>                       |
| ERCC1           | ERCC Excision Repair 1, Endonuclease Non-Catalytic Subunit  | Protein coding | 45 | GC19M048721 | 1.273358226 | <a href="https://www.genecards.org/cgi-bin/carddisp.pl?gene=ERCC1">https://www.genecards.org/cgi-bin/carddisp.pl?gene=ERCC1</a>                     |
| LPAR3           | Lysophosphatidic Acid Receptor 3                            | Protein coding | 44 | GC01M084811 | 1.273358226 | <a href="https://www.genecards.org/cgi-bin/carddisp.pl?gene=LPAR3">https://www.genecards.org/cgi-bin/carddisp.pl?gene=LPAR3</a>                     |
| RAN             | RAN, Member RAS Oncogene Family                             | Protein coding | 44 | GC12P130871 | 1.273358226 | <a href="https://www.genecards.org/cgi-bin/carddisp.pl?gene=RAN">https://www.genecards.org/cgi-bin/carddisp.pl?gene=RAN</a>                         |
| ICMT            | Isoprenylcysteine Carboxyl Methyltransferase                | Protein coding | 42 | GC01M006222 | 1.273358226 | <a href="https://www.genecards.org/cgi-bin/carddisp.pl?gene=ICMT">https://www.genecards.org/cgi-bin/carddisp.pl?gene=ICMT</a>                       |
| TWIST2          | Twist Family BHLH Transcription Factor 2                    | Protein coding | 42 | GC02P238848 | 1.273358226 | <a href="https://www.genecards.org/cgi-bin/carddisp.pl?gene=TWIST2">https://www.genecards.org/cgi-bin/carddisp.pl?gene=TWIST2</a>                   |
| UBA7            | Ubiquitin Like Modifier Activating Enzyme 7                 | Protein coding | 42 | GC03M049805 | 1.273358226 | <a href="https://www.genecards.org/cgi-bin/carddisp.pl?gene=UBA7">https://www.genecards.org/cgi-bin/carddisp.pl?gene=UBA7</a>                       |
| NUP153          | Nucleoporin 153                                             | Protein coding | 40 | GC06M017615 | 1.273358226 | <a href="https://www.genecards.org/cgi-bin/carddisp.pl?gene=NUP153">https://www.genecards.org/cgi-bin/carddisp.pl?gene=NUP153</a>                   |
| NAT10           | N-Acetyltransferase 10                                      | Protein coding | 40 | GC11P034105 | 1.273358226 | <a href="https://www.genecards.org/cgi-bin/carddisp.pl?gene=NAT10">https://www.genecards.org/cgi-bin/carddisp.pl?gene=NAT10</a>                     |
| CLMP            | CXADR Like Membrane Protein                                 | Protein coding | 38 | GC11M123069 | 1.273358226 | <a href="https://www.genecards.org/cgi-bin/carddisp.pl?gene=CLMP">https://www.genecards.org/cgi-bin/carddisp.pl?gene=CLMP</a>                       |
| RCE1            | Ras Converting CAAX Endopeptidase 1                         | Protein coding | 38 | GC11P066842 | 1.273358226 | <a href="https://www.genecards.org/cgi-bin/carddisp.pl?gene=RCE1">https://www.genecards.org/cgi-bin/carddisp.pl?gene=RCE1</a>                       |
| SYNE3           | Spectrin Repeat Containing Nuclear Envelope Family Member 3 | Protein coding | 35 | GC14M096494 | 1.273358226 | <a href="https://www.genecards.org/cgi-bin/carddisp.pl?gene=SYNE3">https://www.genecards.org/cgi-bin/carddisp.pl?gene=SYNE3</a>                     |
| SLC5A6          | Solute Carrier Family 5 Member 6                            | Protein coding | 47 | GC02M027201 | 1.272475958 | <a href="https://www.genecards.org/cgi-bin/carddisp.pl?gene=SLC5A6">https://www.genecards.org/cgi-bin/carddisp.pl?gene=SLC5A6</a>                   |
| CD200           | CD200 Molecule                                              | Protein coding | 38 | GC03P112332 | 1.271196485 | <a href="https://www.genecards.org/cgi-bin/carddisp.pl?gene=CD200">https://www.genecards.org/cgi-bin/carddisp.pl?gene=CD200</a>                     |
| LY96            | Lymphocyte Antigen 96                                       | Protein coding | 41 | GC08P073991 | 1.26942873  | <a href="https://www.genecards.org/cgi-bin/carddisp.pl?gene=LY96">https://www.genecards.org/cgi-bin/carddisp.pl?gene=LY96</a>                       |
| CAVIN2          | Caveolae Associated Protein 2                               | Protein coding | 30 | GC02M191835 | 1.26942873  | <a href="https://www.genecards.org/cgi-bin/carddisp.pl?gene=CAVIN2">https://www.genecards.org/cgi-bin/carddisp.pl?gene=CAVIN2</a>                   |
| MMP14           | Matrix Metallopeptidase 14                                  | Protein coding | 51 | GC14P026861 | 1.269178748 | <a href="https://www.genecards.org/cgi-bin/carddisp.pl?gene=MMP14">https://www.genecards.org/cgi-bin/carddisp.pl?gene=MMP14</a>                     |
| GCGR            | Glucagon Receptor                                           | Protein coding | 47 | GC17P081804 | 1.269149542 | <a href="https://www.genecards.org/cgi-bin/carddisp.pl?gene=GCGR">https://www.genecards.org/cgi-bin/carddisp.pl?gene=GCGR</a>                       |
| DRD3            | Dopamine Receptor D3                                        | Protein coding | 45 | GC03M114128 | 1.269149542 | <a href="https://www.genecards.org/cgi-bin/carddisp.pl?gene=DRD3">https://www.genecards.org/cgi-bin/carddisp.pl?gene=DRD3</a>                       |
| MIR423          | MicroRNA 423                                                | RNA gene       | 18 | GC17P030117 | 1.269149542 | <a href="https://www.genecards.org/cgi-bin/carddisp.pl?gene=MIR423">https://www.genecards.org/cgi-bin/carddisp.pl?gene=MIR423</a>                   |
| FAAH            | Fatty Acid Amide Hydrolase                                  | Protein coding | 48 | GC01P046394 | 1.26869297  | <a href="https://www.genecards.org/cgi-bin/carddisp.pl?gene=FAAH">https://www.genecards.org/cgi-bin/carddisp.pl?gene=FAAH</a>                       |
| PPP1R12A        | Protein Phosphatase 1 Regulatory Subunit 12A                | Protein coding | 44 | GC12M079773 | 1.268661618 | <a href="https://www.genecards.org/cgi-bin/carddisp.pl?gene=PPP1R12A">https://www.genecards.org/cgi-bin/carddisp.pl?gene=PPP1R12A</a>               |
| NOL3            | Nucleolar Protein 3                                         | Protein coding | 43 | GC16P067188 | 1.268629313 | <a href="https://www.genecards.org/cgi-bin/carddisp.pl?gene=NOL3">https://www.genecards.org/cgi-bin/carddisp.pl?gene=NOL3</a>                       |
| BNIP3           | BCL2 Interacting Protein 3                                  | Protein coding | 42 | GC10M131966 | 1.267450213 | <a href="https://www.genecards.org/cgi-bin/carddisp.pl?gene=BNIP3">https://www.genecards.org/cgi-bin/carddisp.pl?gene=BNIP3</a>                     |
| ELAVL1          | ELAV Like RNA Binding Protein 1                             | Protein coding | 42 | GC19M007958 | 1.267139196 | <a href="https://www.genecards.org/cgi-bin/carddisp.pl?gene=ELAVL1">https://www.genecards.org/cgi-bin/carddisp.pl?gene=ELAVL1</a>                   |
| MADD            | MAP Kinase Activating Death Domain                          | Protein coding | 43 | GC11P047290 | 1.264904022 | <a href="https://www.genecards.org/cgi-bin/carddisp.pl?gene=MADD">https://www.genecards.org/cgi-bin/carddisp.pl?gene=MADD</a>                       |
| IGFBP4          | Insulin Like Growth Factor Binding Protein 4                | Protein coding | 42 | GC17P040443 | 1.264904022 | <a href="https://www.genecards.org/cgi-bin/carddisp.pl?gene=IGFBP4">https://www.genecards.org/cgi-bin/carddisp.pl?gene=IGFBP4</a>                   |
| DOCK7           | Dedicator Of Cytokinesis 7                                  | Protein coding | 41 | GC01M062454 | 1.264904022 | <a href="https://www.genecards.org/cgi-bin/carddisp.pl?gene=DOCK7">https://www.genecards.org/cgi-bin/carddisp.pl?gene=DOCK7</a>                     |
| IL17RC          | Interleukin 17 Receptor C                                   | Protein coding | 40 | GC03P009917 | 1.264904022 | <a href="https://www.genecards.org/cgi-bin/carddisp.pl?gene=IL17RC">https://www.genecards.org/cgi-bin/carddisp.pl?gene=IL17RC</a>                   |
| BCO2            | β-Carotene Oxygenase 2                                      | Protein coding | 36 | GC11P112175 | 1.264904022 | <a href="https://www.genecards.org/cgi-bin/carddisp.pl?gene=BCO2">https://www.genecards.org/cgi-bin/carddisp.pl?gene=BCO2</a>                       |
| MIR4669         | MicroRNA 4669                                               | RNA gene       | 10 | GC09P134381 | 1.264904022 | <a href="https://www.genecards.org/cgi-bin/carddisp.pl?gene=MIR4669">https://www.genecards.org/cgi-bin/carddisp.pl?gene=MIR4669</a>                 |
| SLC24A3         | Solute Carrier Family 24 Member 3                           | Protein coding | 39 | GC20P019212 | 1.262563825 | <a href="https://www.genecards.org/cgi-bin/carddisp.pl?gene=SLC24A3">https://www.genecards.org/cgi-bin/carddisp.pl?gene=SLC24A3</a>                 |
| OPCML           | Opioid Binding Protein/Cell Adhesion Molecule Like          | Protein coding | 42 | GC11M132405 | 1.262547612 | <a href="https://www.genecards.org/cgi-bin/carddisp.pl?gene=OPCML">https://www.genecards.org/cgi-bin/carddisp.pl?gene=OPCML</a>                     |
| FABP7           | Fatty Acid Binding Protein 7                                | Protein coding | 42 | GC06P122768 | 1.258103251 | <a href="https://www.genecards.org/cgi-bin/carddisp.pl?gene=FABP7">https://www.genecards.org/cgi-bin/carddisp.pl?gene=FABP7</a>                     |
| INF2            | Inverted Formin 2                                           | Protein coding | 40 | GC14P106548 | 1.257042527 | <a href="https://www.genecards.org/cgi-bin/carddisp.pl?gene=INF2">https://www.genecards.org/cgi-bin/carddisp.pl?gene=INF2</a>                       |
| AQP2            | Aquaporin 2                                                 | Protein coding | 47 | GC12P049950 | 1.256199837 | <a href="https://www.genecards.org/cgi-bin/carddisp.pl?gene=AQP2">https://www.genecards.org/cgi-bin/carddisp.pl?gene=AQP2</a>                       |
| STK39           | Serine/Threonine Kinase 39                                  | Protein coding | 44 | GC02M167954 | 1.256199837 | <a href="https://www.genecards.org/cgi-bin/carddisp.pl?gene=STK39">https://www.genecards.org/cgi-bin/carddisp.pl?gene=STK39</a>                     |
| ARNTL           | Aryl Hydrocarbon Receptor Nuclear Translocator Like         | Protein coding | 43 | GC11P013276 | 1.256199837 | <a href="https://www.genecards.org/cgi-bin/carddisp.pl?gene=ARNTL">https://www.genecards.org/cgi-bin/carddisp.pl?gene=ARNTL</a>                     |
| MIR222          | MicroRNA 222                                                | RNA gene       | 22 | GC0XM045747 | 1.256199837 | <a href="https://www.genecards.org/cgi-bin/carddisp.pl?gene=MIR222">https://www.genecards.org/cgi-bin/carddisp.pl?gene=MIR222</a>                   |
| KLHL3           | Kelch Like Family Member 3                                  | Protein coding | 42 | GC05M137617 | 1.255930424 | <a href="https://www.genecards.org/cgi-bin/carddisp.pl?gene=KLHL3">https://www.genecards.org/cgi-bin/carddisp.pl?gene=KLHL3</a>                     |
| CRABP1          | Cellular Retinoic Acid Binding Protein 1                    | Protein coding | 41 | GC15P078340 | 1.252113819 | <a href="https://www.genecards.org/cgi-bin/carddisp.pl?gene=CRABP1">https://www.genecards.org/cgi-bin/carddisp.pl?gene=CRABP1</a>                   |
| TRIM31          | Tripartite Motif Containing 31                              | Protein coding | 38 | GC06M049019 | 1.252113819 | <a href="https://www.genecards.org/cgi-bin/carddisp.pl?gene=TRIM31">https://www.genecards.org/cgi-bin/carddisp.pl?gene=TRIM31</a>                   |
| UBE2W           | Ubiquitin Conjugating Enzyme E2 W                           | Protein coding | 38 | GC08M073780 | 1.252113819 | <a href="https://www.genecards.org/cgi-bin/carddisp.pl?gene=UBE2W">https://www.genecards.org/cgi-bin/carddisp.pl?gene=UBE2W</a>                     |
| ZXDC            | ZXD Family Zinc Finger C                                    | Protein coding | 35 | GC03M126437 | 1.252113819 | <a href="https://www.genecards.org/cgi-bin/carddisp.pl?gene=ZXDC">https://www.genecards.org/cgi-bin/carddisp.pl?gene=ZXDC</a>                       |
| C6orf58         | Chromosome 6 Open Reading Frame 58                          | Protein coding | 34 | GC06P127519 | 1.252113819 | <a href="https://www.genecards.org/cgi-bin/carddisp.pl?gene=C6orf58">https://www.genecards.org/cgi-bin/carddisp.pl?gene=C6orf58</a>                 |
| ANKRD13D        | Ankyrin Repeat Domain 13D                                   | Protein coding | 34 | GC11P067288 | 1.252113819 | <a href="https://www.genecards.org/cgi-bin/carddisp.pl?gene=ANKRD13D">https://www.genecards.org/cgi-bin/carddisp.pl?gene=ANKRD13D</a>               |
| FGFBP2          | Fibroblast Growth Factor Binding Protein 2                  | Protein coding | 33 | GC04M015961 | 1.252113819 | <a href="https://www.genecards.org/cgi-bin/carddisp.pl?gene=FGFBP2">https://www.genecards.org/cgi-bin/carddisp.pl?gene=FGFBP2</a>                   |
| KHDC1           | KH Domain Containing 1                                      | Protein coding | 33 | GC06M073241 | 1.252113819 | <a href="https://www.genecards.org/cgi-bin/carddisp.pl?gene=KHDC1">https://www.genecards.org/cgi-bin/carddisp.pl?gene=KHDC1</a>                     |
| CCER2           | Coiled-Coil Glutamate Rich Protein 2                        | Protein coding | 22 | GC19M038908 | 1.252113819 | <a href="https://www.genecards.org/cgi-bin/carddisp.pl?gene=CCER2">https://www.genecards.org/cgi-bin/carddisp.pl?gene=CCER2</a>                     |
| CEP295NL        | CEP295 N-Terminal Like                                      | Protein coding | 22 | GC17M078870 | 1.252113819 | <a href="https://www.genecards.org/cgi-bin/carddisp.pl?gene=CEP295NL">https://www.genecards.org/cgi-bin/carddisp.pl?gene=CEP295NL</a>               |
| DEFB133         | Defensin β 133 (Pseudogene)                                 | Pseudogene     | 19 | GC06M049946 | 1.252113819 | <a href="https://www.genecards.org/cgi-bin/carddisp.pl?gene=DEFB133">https://www.genecards.org/cgi-bin/carddisp.pl?gene=DEFB133</a>                 |
| LINC00316       | Long Intergenic Non-Protein Coding RNA 316                  | RNA gene       | 15 | GC21M045338 | 1.252113819 | <a href="https://www.genecards.org/cgi-bin/carddisp.pl?gene=LINC00316">https://www.genecards.org/cgi-bin/carddisp.pl?gene=LINC00316</a>             |
| MIR124-2HG      | MIR124-2 Host Gene                                          | RNA gene       | 15 | GC08P064373 | 1.252113819 | <a href="https://www.genecards.org/cgi-bin/carddisp.pl?gene=MIR124-2HG">https://www.genecards.org/cgi-bin/carddisp.pl?gene=MIR124-2HG</a>           |
| MIR3679         | MicroRNA 3679                                               | RNA gene       | 15 | GC02P134127 | 1.252113819 | <a href="https://www.genecards.org/cgi-bin/carddisp.pl?gene=MIR3679">https://www.genecards.org/cgi-bin/carddisp.pl?gene=MIR3679</a>                 |
| LINC00351       | Long Intergenic Non-Protein Coding RNA 351                  | RNA gene       | 13 | GC13P085363 | 1.252113819 | <a href="https://www.genecards.org/cgi-bin/carddisp.pl?gene=LINC00351">https://www.genecards.org/cgi-bin/carddisp.pl?gene=LINC00351</a>             |
| MIR6165         | MicroRNA 6165                                               | RNA gene       | 9  | GC17P049510 | 1.252113819 | <a href="https://www.genecards.org/cgi-bin/carddisp.pl?gene=MIR6165">https://www.genecards.org/cgi-bin/carddisp.pl?gene=MIR6165</a>                 |
| MFN1            | Mitofusin 1                                                 | Protein coding | 42 | GC03P179347 | 1.251187563 | <a href="https://www.genecards.org/cgi-bin/carddisp.pl?gene=MFN1">https://www.genecards.org/cgi-bin/carddisp.pl?gene=MFN1</a>                       |

|          |                                                                  |                |    |             |             |                                                                                                                                       |
|----------|------------------------------------------------------------------|----------------|----|-------------|-------------|---------------------------------------------------------------------------------------------------------------------------------------|
| SLK      | STE20 Like Kinase                                                | Protein coding | 44 | GC10P103967 | 1.250617981 | <a href="https://www.genecards.org/cgi-bin/carddisp.pl?gene=SLK">https://www.genecards.org/cgi-bin/carddisp.pl?gene=SLK</a>           |
| CACNA1S  | Calcium Voltage-Gated Channel Subunit $\alpha$ 1 S               | Protein coding | 48 | GC01M201008 | 1.248311281 | <a href="https://www.genecards.org/cgi-bin/carddisp.pl?gene=CACNA1S">https://www.genecards.org/cgi-bin/carddisp.pl?gene=CACNA1S</a>   |
| TBX1     | T-Box Transcription Factor 1                                     | Protein coding | 43 | GC22P020283 | 1.246402025 | <a href="https://www.genecards.org/cgi-bin/carddisp.pl?gene=TBX1">https://www.genecards.org/cgi-bin/carddisp.pl?gene=TBX1</a>         |
| PCDH7    | Protocadherin 7                                                  | Protein coding | 39 | GC04P030722 | 1.242056131 | <a href="https://www.genecards.org/cgi-bin/carddisp.pl?gene=PCDH7">https://www.genecards.org/cgi-bin/carddisp.pl?gene=PCDH7</a>       |
| NT5C1B   | 5'-Nucleotidase, Cytosolic IB                                    | Protein coding | 38 | GC02M018562 | 1.242056131 | <a href="https://www.genecards.org/cgi-bin/carddisp.pl?gene=NT5C1B">https://www.genecards.org/cgi-bin/carddisp.pl?gene=NT5C1B</a>     |
| ABAT     | 4-Aminobutyrate Aminotransferase                                 | Protein coding | 45 | GC16P008674 | 1.240763903 | <a href="https://www.genecards.org/cgi-bin/carddisp.pl?gene=ABAT">https://www.genecards.org/cgi-bin/carddisp.pl?gene=ABAT</a>         |
| SVIL     | Supervillin                                                      | Protein coding | 41 | GC10M031319 | 1.238678575 | <a href="https://www.genecards.org/cgi-bin/carddisp.pl?gene=SVIL">https://www.genecards.org/cgi-bin/carddisp.pl?gene=SVIL</a>         |
| LNPEP    | Leucyl And Cystinyl Aminopeptidase                               | Protein coding | 45 | GC05P096935 | 1.237206101 | <a href="https://www.genecards.org/cgi-bin/carddisp.pl?gene=LNPEP">https://www.genecards.org/cgi-bin/carddisp.pl?gene=LNPEP</a>       |
| CCL4     | C-C Motif Chemokine Ligand 4                                     | Protein coding | 40 | GC17P036103 | 1.236773849 | <a href="https://www.genecards.org/cgi-bin/carddisp.pl?gene=CCL4">https://www.genecards.org/cgi-bin/carddisp.pl?gene=CCL4</a>         |
| GNS      | Glucosamine (N-Acetyl)-6-Sulfatase                               | Protein coding | 44 | GC12M064713 | 1.236320376 | <a href="https://www.genecards.org/cgi-bin/carddisp.pl?gene=GNS">https://www.genecards.org/cgi-bin/carddisp.pl?gene=GNS</a>           |
| PEX16    | Peroxisomal Biogenesis Factor 16                                 | Protein coding | 38 | GC11M071209 | 1.236320376 | <a href="https://www.genecards.org/cgi-bin/carddisp.pl?gene=PEX16">https://www.genecards.org/cgi-bin/carddisp.pl?gene=PEX16</a>       |
| PAGR1    | PAXIP1 Associated Glutamate Rich Protein 1                       | Protein coding | 33 | GC16P033389 | 1.236320376 | <a href="https://www.genecards.org/cgi-bin/carddisp.pl?gene=PAGR1">https://www.genecards.org/cgi-bin/carddisp.pl?gene=PAGR1</a>       |
| ATL1     | Atlantin GTPase 1                                                | Protein coding | 41 | GC14P050532 | 1.235634446 | <a href="https://www.genecards.org/cgi-bin/carddisp.pl?gene=ATL1">https://www.genecards.org/cgi-bin/carddisp.pl?gene=ATL1</a>         |
| PAH      | Phenylalanine Hydroxylase                                        | Protein coding | 49 | GC12M102836 | 1.233971238 | <a href="https://www.genecards.org/cgi-bin/carddisp.pl?gene=PAH">https://www.genecards.org/cgi-bin/carddisp.pl?gene=PAH</a>           |
| TRIM21   | Tripartite Motif Containing 21                                   | Protein coding | 41 | GC11M004384 | 1.233971238 | <a href="https://www.genecards.org/cgi-bin/carddisp.pl?gene=TRIM21">https://www.genecards.org/cgi-bin/carddisp.pl?gene=TRIM21</a>     |
| CEACAM1  | CEA Cell Adhesion Molecule 1                                     | Protein coding | 42 | GC19M042507 | 1.229759932 | <a href="https://www.genecards.org/cgi-bin/carddisp.pl?gene=CEACAM1">https://www.genecards.org/cgi-bin/carddisp.pl?gene=CEACAM1</a>   |
| CCL26    | C-C Motif Chemokine Ligand 26                                    | Protein coding | 37 | GC07M075769 | 1.228446245 | <a href="https://www.genecards.org/cgi-bin/carddisp.pl?gene=CCL26">https://www.genecards.org/cgi-bin/carddisp.pl?gene=CCL26</a>       |
| IRF2BP2  | Interferon Regulatory Factor 2 Binding Protein 2                 | Protein coding | 36 | GC01M234604 | 1.226211905 | <a href="https://www.genecards.org/cgi-bin/carddisp.pl?gene=IRF2BP2">https://www.genecards.org/cgi-bin/carddisp.pl?gene=IRF2BP2</a>   |
| MMADHC   | Metabolism Of Cobalamin Associated D                             | Protein coding | 42 | GC02M149569 | 1.225909829 | <a href="https://www.genecards.org/cgi-bin/carddisp.pl?gene=MMADHC">https://www.genecards.org/cgi-bin/carddisp.pl?gene=MMADHC</a>     |
| MIR26B   | MicroRNA 26b                                                     | RNA gene       | 22 | GC02P218402 | 1.224256158 | <a href="https://www.genecards.org/cgi-bin/carddisp.pl?gene=MIR26B">https://www.genecards.org/cgi-bin/carddisp.pl?gene=MIR26B</a>     |
| AVPR2    | Arginine Vasopressin Receptor 2                                  | Protein coding | 48 | GC0XP153902 | 1.223898649 | <a href="https://www.genecards.org/cgi-bin/carddisp.pl?gene=AVPR2">https://www.genecards.org/cgi-bin/carddisp.pl?gene=AVPR2</a>       |
| TACR1    | Tachykinin Receptor 1                                            | Protein coding | 46 | GC02M075010 | 1.223898649 | <a href="https://www.genecards.org/cgi-bin/carddisp.pl?gene=TACR1">https://www.genecards.org/cgi-bin/carddisp.pl?gene=TACR1</a>       |
| TBL3     | Transducin $\beta$ Like 3                                        | Protein coding | 39 | GC16P006182 | 1.220353484 | <a href="https://www.genecards.org/cgi-bin/carddisp.pl?gene=TBL3">https://www.genecards.org/cgi-bin/carddisp.pl?gene=TBL3</a>         |
| GPR135   | G Protein-Coupled Receptor 135                                   | Protein coding | 36 | GC14M059429 | 1.220353484 | <a href="https://www.genecards.org/cgi-bin/carddisp.pl?gene=GPR135">https://www.genecards.org/cgi-bin/carddisp.pl?gene=GPR135</a>     |
| SLC12A3  | Solute Carrier Family 12 Member 3                                | Protein coding | 46 | GC16P056865 | 1.219975233 | <a href="https://www.genecards.org/cgi-bin/carddisp.pl?gene=SLC12A3">https://www.genecards.org/cgi-bin/carddisp.pl?gene=SLC12A3</a>   |
| P2RX3    | Purinergic Receptor P2X 3                                        | Protein coding | 42 | GC11P057356 | 1.219975233 | <a href="https://www.genecards.org/cgi-bin/carddisp.pl?gene=P2RX3">https://www.genecards.org/cgi-bin/carddisp.pl?gene=P2RX3</a>       |
| ATP1A4   | ATPase Na+/K+ Transporting Subunit $\alpha$ 4                    | Protein coding | 41 | GC01P160151 | 1.219975233 | <a href="https://www.genecards.org/cgi-bin/carddisp.pl?gene=ATP1A4">https://www.genecards.org/cgi-bin/carddisp.pl?gene=ATP1A4</a>     |
| DDR2     | Discoidin Domain Receptor Tyrosine Kinase 2                      | Protein coding | 50 | GC01P162631 | 1.218797207 | <a href="https://www.genecards.org/cgi-bin/carddisp.pl?gene=DDR2">https://www.genecards.org/cgi-bin/carddisp.pl?gene=DDR2</a>         |
| FLRT2    | Fibronectin Leucine Rich Transmembrane Protein 2                 | Protein coding | 38 | GC14P085527 | 1.218797207 | <a href="https://www.genecards.org/cgi-bin/carddisp.pl?gene=FLRT2">https://www.genecards.org/cgi-bin/carddisp.pl?gene=FLRT2</a>       |
| RP1      | RP1 Axonemal Microtubule Associated                              | Protein coding | 37 | GC08P054555 | 1.218797207 | <a href="https://www.genecards.org/cgi-bin/carddisp.pl?gene=RP1">https://www.genecards.org/cgi-bin/carddisp.pl?gene=RP1</a>           |
| AGBL1    | AGBL Carboxypeptidase 1                                          | Protein coding | 36 | GC15P086141 | 1.218797207 | <a href="https://www.genecards.org/cgi-bin/carddisp.pl?gene=AGBL1">https://www.genecards.org/cgi-bin/carddisp.pl?gene=AGBL1</a>       |
| VLDLR    | Very Low Density Lipoprotein Receptor                            | Protein coding | 50 | GC09P002611 | 1.217455029 | <a href="https://www.genecards.org/cgi-bin/carddisp.pl?gene=VLDLR">https://www.genecards.org/cgi-bin/carddisp.pl?gene=VLDLR</a>       |
| HLA-DPB1 | Major Histocompatibility Complex, Class II, DP $\beta$ 1         | Protein coding | 44 | GC06P058347 | 1.21677506  | <a href="https://www.genecards.org/cgi-bin/carddisp.pl?gene=HLA-DPB1">https://www.genecards.org/cgi-bin/carddisp.pl?gene=HLA-DPB1</a> |
| RELB     | RELB Proto-Oncogene, NF-KB Subunit                               | Protein coding | 45 | GC19P045002 | 1.215018511 | <a href="https://www.genecards.org/cgi-bin/carddisp.pl?gene=RELB">https://www.genecards.org/cgi-bin/carddisp.pl?gene=RELB</a>         |
| G6PC1    | Glucose-6-Phosphatase Catalytic Subunit 1                        | Protein coding | 36 | GC17P045036 | 1.209553003 | <a href="https://www.genecards.org/cgi-bin/carddisp.pl?gene=G6PC1">https://www.genecards.org/cgi-bin/carddisp.pl?gene=G6PC1</a>       |
| KCNK2    | Potassium Two Pore Domain Channel Subfamily K Member 2           | Protein coding | 40 | GC01P215005 | 1.209185123 | <a href="https://www.genecards.org/cgi-bin/carddisp.pl?gene=KCNK2">https://www.genecards.org/cgi-bin/carddisp.pl?gene=KCNK2</a>       |
| RIPK3    | Receptor Interacting Serine/Threonine Kinase 3                   | Protein coding | 43 | GC14M024336 | 1.208637238 | <a href="https://www.genecards.org/cgi-bin/carddisp.pl?gene=RIPK3">https://www.genecards.org/cgi-bin/carddisp.pl?gene=RIPK3</a>       |
| TOP1     | DNA Topoisomerase I                                              | Protein coding | 48 | GC20P041028 | 1.208393097 | <a href="https://www.genecards.org/cgi-bin/carddisp.pl?gene=TOP1">https://www.genecards.org/cgi-bin/carddisp.pl?gene=TOP1</a>         |
| ARSB     | Arylsulfatase B                                                  | Protein coding | 44 | GC05M078777 | 1.207242727 | <a href="https://www.genecards.org/cgi-bin/carddisp.pl?gene=ARSB">https://www.genecards.org/cgi-bin/carddisp.pl?gene=ARSB</a>         |
| ADD3     | Adducin 3                                                        | Protein coding | 43 | GC10P109996 | 1.205166578 | <a href="https://www.genecards.org/cgi-bin/carddisp.pl?gene=ADD3">https://www.genecards.org/cgi-bin/carddisp.pl?gene=ADD3</a>         |
| CSPG4    | Chondroitin Sulfate Proteoglycan 4                               | Protein coding | 44 | GC15M075674 | 1.204517961 | <a href="https://www.genecards.org/cgi-bin/carddisp.pl?gene=CSPG4">https://www.genecards.org/cgi-bin/carddisp.pl?gene=CSPG4</a>       |
| RECK     | Reversion Inducing Cysteine Rich Protein With Kazal Motifs       | Protein coding | 41 | GC09P036036 | 1.202026367 | <a href="https://www.genecards.org/cgi-bin/carddisp.pl?gene=RECK">https://www.genecards.org/cgi-bin/carddisp.pl?gene=RECK</a>         |
| CSTA     | Cystatin A                                                       | Protein coding | 43 | GC03P122325 | 1.200320244 | <a href="https://www.genecards.org/cgi-bin/carddisp.pl?gene=CSTA">https://www.genecards.org/cgi-bin/carddisp.pl?gene=CSTA</a>         |
| CST6     | Cystatin E/M                                                     | Protein coding | 39 | GC11P066877 | 1.200320244 | <a href="https://www.genecards.org/cgi-bin/carddisp.pl?gene=CST6">https://www.genecards.org/cgi-bin/carddisp.pl?gene=CST6</a>         |
| CST5     | Cystatin D                                                       | Protein coding | 38 | GC20M023875 | 1.200320244 | <a href="https://www.genecards.org/cgi-bin/carddisp.pl?gene=CST5">https://www.genecards.org/cgi-bin/carddisp.pl?gene=CST5</a>         |
| CST7     | Cystatin F                                                       | Protein coding | 37 | GC20P024949 | 1.200320244 | <a href="https://www.genecards.org/cgi-bin/carddisp.pl?gene=CST7">https://www.genecards.org/cgi-bin/carddisp.pl?gene=CST7</a>         |
| CST4     | Cystatin S                                                       | Protein coding | 36 | GC20M023685 | 1.200320244 | <a href="https://www.genecards.org/cgi-bin/carddisp.pl?gene=CST4">https://www.genecards.org/cgi-bin/carddisp.pl?gene=CST4</a>         |
| CRLS1    | Cardiolipin Synthase 1                                           | Protein coding | 39 | GC20P006005 | 1.200178385 | <a href="https://www.genecards.org/cgi-bin/carddisp.pl?gene=CRLS1">https://www.genecards.org/cgi-bin/carddisp.pl?gene=CRLS1</a>       |
| FIP1L1   | Factor Interacting With PAPOLA And CPSF1                         | Protein coding | 39 | GC04P053398 | 1.197971106 | <a href="https://www.genecards.org/cgi-bin/carddisp.pl?gene=FIP1L1">https://www.genecards.org/cgi-bin/carddisp.pl?gene=FIP1L1</a>     |
| TSPAN16  | Tetraspanin 16                                                   | Protein coding | 31 | GC19P011296 | 1.197971106 | <a href="https://www.genecards.org/cgi-bin/carddisp.pl?gene=TSPAN16">https://www.genecards.org/cgi-bin/carddisp.pl?gene=TSPAN16</a>   |
| EIF4A2   | Eukaryotic Translation Initiation Factor 4A2                     | Protein coding | 45 | GC03P186783 | 1.19726181  | <a href="https://www.genecards.org/cgi-bin/carddisp.pl?gene=EIF4A2">https://www.genecards.org/cgi-bin/carddisp.pl?gene=EIF4A2</a>     |
| PTGER3   | Prostaglandin E Receptor 3                                       | Protein coding | 47 | GC01M070852 | 1.195242167 | <a href="https://www.genecards.org/cgi-bin/carddisp.pl?gene=PTGER3">https://www.genecards.org/cgi-bin/carddisp.pl?gene=PTGER3</a>     |
| RCAN1    | Regulator Of Calcineurin 1                                       | Protein coding | 43 | GC21M034513 | 1.195037246 | <a href="https://www.genecards.org/cgi-bin/carddisp.pl?gene=RCAN1">https://www.genecards.org/cgi-bin/carddisp.pl?gene=RCAN1</a>       |
| INPP5D   | Inositol Polyphosphate-5-Phosphatase D                           | Protein coding | 45 | GC02P233059 | 1.191970825 | <a href="https://www.genecards.org/cgi-bin/carddisp.pl?gene=INPP5D">https://www.genecards.org/cgi-bin/carddisp.pl?gene=INPP5D</a>     |
| PDIA2    | Protein Disulfide Isomerase Family A Member 2                    | Protein coding | 38 | GC16P006109 | 1.191293716 | <a href="https://www.genecards.org/cgi-bin/carddisp.pl?gene=PDIA2">https://www.genecards.org/cgi-bin/carddisp.pl?gene=PDIA2</a>       |
| MAPK13   | Mitogen-Activated Protein Kinase 13                              | Protein coding | 47 | GC06P058452 | 1.191207647 | <a href="https://www.genecards.org/cgi-bin/carddisp.pl?gene=MAPK13">https://www.genecards.org/cgi-bin/carddisp.pl?gene=MAPK13</a>     |
| TPM4     | Tropomyosin 4                                                    | Protein coding | 40 | GC19P027745 | 1.191207647 | <a href="https://www.genecards.org/cgi-bin/carddisp.pl?gene=TPM4">https://www.genecards.org/cgi-bin/carddisp.pl?gene=TPM4</a>         |
| SLC35F3  | Solute Carrier Family 35 Member F3                               | Protein coding | 34 | GC01P233904 | 1.191207647 | <a href="https://www.genecards.org/cgi-bin/carddisp.pl?gene=SLC35F3">https://www.genecards.org/cgi-bin/carddisp.pl?gene=SLC35F3</a>   |
| FLVCR1   | FLVCR Heme Transporter 1                                         | Protein coding | 40 | GC01P212858 | 1.191030979 | <a href="https://www.genecards.org/cgi-bin/carddisp.pl?gene=FLVCR1">https://www.genecards.org/cgi-bin/carddisp.pl?gene=FLVCR1</a>     |
| SLC25A38 | Solute Carrier Family 25 Member 38                               | Protein coding | 38 | GC03P039573 | 1.191030979 | <a href="https://www.genecards.org/cgi-bin/carddisp.pl?gene=SLC25A38">https://www.genecards.org/cgi-bin/carddisp.pl?gene=SLC25A38</a> |
| NR4A1    | Nuclear Receptor Subfamily 4 Group A Member 1                    | Protein coding | 47 | GC12P052022 | 1.189863682 | <a href="https://www.genecards.org/cgi-bin/carddisp.pl?gene=NR4A1">https://www.genecards.org/cgi-bin/carddisp.pl?gene=NR4A1</a>       |
| RO60     | Ro60, Y RNA Binding Protein                                      | Protein coding | 30 | GC01P193059 | 1.187574148 | <a href="https://www.genecards.org/cgi-bin/carddisp.pl?gene=RO60">https://www.genecards.org/cgi-bin/carddisp.pl?gene=RO60</a>         |
| SCN4A    | Sodium Voltage-Gated Channel $\alpha$ Subunit 4                  | Protein coding | 44 | GC17M063938 | 1.18617022  | <a href="https://www.genecards.org/cgi-bin/carddisp.pl?gene=SCN4A">https://www.genecards.org/cgi-bin/carddisp.pl?gene=SCN4A</a>       |
| MED23    | Mediator Complex Subunit 23                                      | Protein coding | 42 | GC06M131573 | 1.18417263  | <a href="https://www.genecards.org/cgi-bin/carddisp.pl?gene=MED23">https://www.genecards.org/cgi-bin/carddisp.pl?gene=MED23</a>       |
| GNAI1    | G Protein Subunit $\alpha$ I1                                    | Protein coding | 47 | GC07P079769 | 1.184007168 | <a href="https://www.genecards.org/cgi-bin/carddisp.pl?gene=GNAI1">https://www.genecards.org/cgi-bin/carddisp.pl?gene=GNAI1</a>       |
| NOX5     | NADPH Oxidase 5                                                  | Protein coding | 38 | GC15P078993 | 1.183631182 | <a href="https://www.genecards.org/cgi-bin/carddisp.pl?gene=NOX5">https://www.genecards.org/cgi-bin/carddisp.pl?gene=NOX5</a>         |
| TRPM8    | Transient Receptor Potential Cation Channel Subfamily M Member 8 | Protein coding | 44 | GC02P233917 | 1.181889296 | <a href="https://www.genecards.org/cgi-bin/carddisp.pl?gene=TRPM8">https://www.genecards.org/cgi-bin/carddisp.pl?gene=TRPM8</a>       |
| MIR23B   | MicroRNA 23b                                                     | RNA gene       | 20 | GC09P095085 | 1.181889296 | <a href="https://www.genecards.org/cgi-bin/carddisp.pl?gene=MIR23B">https://www.genecards.org/cgi-bin/carddisp.pl?gene=MIR23B</a>     |
| BCKDHB   | Branched Chain Keto Acid Dehydrogenase E1 Subunit $\beta$        | Protein coding | 43 | GC06P080106 | 1.181852937 | <a href="https://www.genecards.org/cgi-bin/carddisp.pl?gene=BCKDHB">https://www.genecards.org/cgi-bin/carddisp.pl?gene=BCKDHB</a>     |
| CACNA1H  | Calcium Voltage-Gated Channel Subunit $\alpha$ 1 H               | Protein coding | 50 | GC16P001153 | 1.177577019 | <a href="https://www.genecards.org/cgi-bin/carddisp.pl?gene=CACNA1H">https://www.genecards.org/cgi-bin/carddisp.pl?gene=CACNA1H</a>   |
| GRK4     | G Protein-Coupled Receptor Kinase 4                              | Protein coding | 43 | GC04P002963 | 1.177577019 | <a href="https://www.genecards.org/cgi-bin/carddisp.pl?gene=GRK4">https://www.genecards.org/cgi-bin/carddisp.pl?gene=GRK4</a>         |
| ADD2     | Adducin 2                                                        | Protein coding | 41 | GC02M070626 | 1.177577019 | <a href="https://www.genecards.org/cgi-bin/carddisp.pl?gene=ADD2">https://www.genecards.org/cgi-bin/carddisp.pl?gene=ADD2</a>         |
| CD44     | CD44 Molecule (Indian Blood Group)                               | Protein coding | 47 | GC11P035139 | 1.173841715 | <a href="https://www.genecards.org/cgi-bin/carddisp.pl?gene=CD44">https://www.genecards.org/cgi-bin/carddisp.pl?gene=CD44</a>         |
| MAP1LC3A | Microtubule Associated Protein 1 Light Chain 3 $\alpha$          | Protein coding | 43 | GC20P034546 | 1.173819542 | <a href="https://www.genecards.org/cgi-bin/carddisp.pl?gene=MAP1LC3A">https://www.genecards.org/cgi-bin/carddisp.pl?gene=MAP1LC3A</a> |
| VCL      | Vinculin                                                         | Protein coding | 47 | GC10P073995 | 1.172178507 | <a href="https://www.genecards.org/cgi-bin/carddisp.pl?gene=VCL">https://www.genecards.org/cgi-bin/carddisp.pl?gene=VCL</a>           |
| HOXD13   | Homeobox D13                                                     | Protein coding | 41 | GC02P176092 | 1.171084762 | <a href="https://www.genecards.org/cgi-bin/carddisp.pl?gene=HOXD13">https://www.genecards.org/cgi-bin/carddisp.pl?gene=HOXD13</a>     |

|          |                                                                           |                |    |             |             |                                                             |
|----------|---------------------------------------------------------------------------|----------------|----|-------------|-------------|-------------------------------------------------------------|
| HTR1B    | 5-Hydroxytryptamine Receptor 1B                                           | Protein coding | 45 | GC06M077478 | 1.169554472 | https://www.genecards.org/cgi-bin/carddisp.pl?gene=HTR1B    |
| OGA      | O-GlcNAcase                                                               | Protein coding | 32 | GC10M101785 | 1.169396162 | https://www.genecards.org/cgi-bin/carddisp.pl?gene=OGA      |
| ARTN     | Artemin                                                                   | Protein coding | 39 | GC01P043933 | 1.168955922 | https://www.genecards.org/cgi-bin/carddisp.pl?gene=ARTN     |
| SLC25A14 | Solute Carrier Family 25 Member 14                                        | Protein coding | 40 | GC0XP130339 | 1.164860129 | https://www.genecards.org/cgi-bin/carddisp.pl?gene=SLC25A14 |
| TXNIP    | Thioredoxin Interacting Protein                                           | Protein coding | 37 | GC01M145992 | 1.163233519 | https://www.genecards.org/cgi-bin/carddisp.pl?gene=TXNIP    |
| SEPTIN9  | Septin 9                                                                  | Protein coding | 35 | GC17P077282 | 1.162933946 | https://www.genecards.org/cgi-bin/carddisp.pl?gene=SEPTIN9  |
| LARGE2   | LARGE Xylosyl- And Glucuronyltransferase 2                                | Protein coding | 28 | GC11P046145 | 1.162933946 | https://www.genecards.org/cgi-bin/carddisp.pl?gene=LARGE2   |
| CCL20    | C-C Motif Chemokine Ligand 20                                             | Protein coding | 43 | GC02P227820 | 1.162274361 | https://www.genecards.org/cgi-bin/carddisp.pl?gene=CCL20    |
| MIR216A  | MicroRNA 216a                                                             | RNA gene       | 20 | GC02M055988 | 1.161774397 | https://www.genecards.org/cgi-bin/carddisp.pl?gene=MIR216A  |
| ADAM12   | ADAM Metallopeptidase Domain 12                                           | Protein coding | 44 | GC10M126012 | 1.159970045 | https://www.genecards.org/cgi-bin/carddisp.pl?gene=ADAM12   |
| SFN      | Stratifin                                                                 | Protein coding | 45 | GC01P026940 | 1.159533501 | https://www.genecards.org/cgi-bin/carddisp.pl?gene=SFN      |
| COL14A1  | Collagen Type XIV $\alpha$ 1 Chain                                        | Protein coding | 42 | GC08P120073 | 1.159533501 | https://www.genecards.org/cgi-bin/carddisp.pl?gene=COL14A1  |
| ADAMTS3  | ADAM Metallopeptidase With Thrombospondin Type 1 Motif 3                  | Protein coding | 41 | GC04M072280 | 1.159533501 | https://www.genecards.org/cgi-bin/carddisp.pl?gene=ADAMTS3  |
| AIM2     | Absent In Melanoma 2                                                      | Protein coding | 42 | GC01M159062 | 1.159130692 | https://www.genecards.org/cgi-bin/carddisp.pl?gene=AIM2     |
| ARNT2    | Aryl Hydrocarbon Receptor Nuclear Translocator 2                          | Protein coding | 44 | GC15P080404 | 1.155252457 | https://www.genecards.org/cgi-bin/carddisp.pl?gene=ARNT2    |
| KCNK1    | Potassium Two Pore Domain Channel Subfamily K Member 1                    | Protein coding | 43 | GC01P233614 | 1.155252457 | https://www.genecards.org/cgi-bin/carddisp.pl?gene=KCNK1    |
| SLC14A2  | Solute Carrier Family 14 Member 2                                         | Protein coding | 41 | GC18P045167 | 1.155252457 | https://www.genecards.org/cgi-bin/carddisp.pl?gene=SLC14A2  |
| NDUFV3   | NADH:Ubiquinone Oxidoreductase Subunit V3                                 | Protein coding | 40 | GC21P042879 | 1.155252457 | https://www.genecards.org/cgi-bin/carddisp.pl?gene=NDUFV3   |
| IRX1     | Iroquois Homeobox 1                                                       | Protein coding | 38 | GC05P003596 | 1.155252457 | https://www.genecards.org/cgi-bin/carddisp.pl?gene=IRX1     |
| TMX1     | Thioredoxin Related Transmembrane Protein 1                               | Protein coding | 38 | GC14P051240 | 1.155252457 | https://www.genecards.org/cgi-bin/carddisp.pl?gene=TMX1     |
| STARD3NL | STARD3 N-Terminal Like                                                    | Protein coding | 37 | GC07P038218 | 1.155252457 | https://www.genecards.org/cgi-bin/carddisp.pl?gene=STARD3NL |
| PF4V1    | Platelet Factor 4 Variant 1                                               | Protein coding | 37 | GC04P073853 | 1.155252457 | https://www.genecards.org/cgi-bin/carddisp.pl?gene=PF4V1    |
| CCDC39   | Coiled-Coil Domain Containing 39                                          | Protein coding | 36 | GC03M180602 | 1.155252457 | https://www.genecards.org/cgi-bin/carddisp.pl?gene=CCDC39   |
| CHORDC1  | Cysteine And Histidine Rich Domain Containing 1                           | Protein coding | 36 | GC11M090200 | 1.155252457 | https://www.genecards.org/cgi-bin/carddisp.pl?gene=CHORDC1  |
| AJAP1    | Adherens Junctions Associated Protein 1                                   | Protein coding | 33 | GC01P004654 | 1.155252457 | https://www.genecards.org/cgi-bin/carddisp.pl?gene=AJAP1    |
| RPL7P45  | Ribosomal Protein L7 Pseudogene 45                                        | Pseudogene     | 6  | GC13P104814 | 1.155252457 | https://www.genecards.org/cgi-bin/carddisp.pl?gene=RPL7P45  |
| PYY      | Peptide YY                                                                | Protein coding | 43 | GC17M043952 | 1.153898835 | https://www.genecards.org/cgi-bin/carddisp.pl?gene=PYY      |
| CAMKK2   | Calcium/Calmodulin Dependent Protein Kinase Kinase 2                      | Protein coding | 47 | GC12M121608 | 1.153456092 | https://www.genecards.org/cgi-bin/carddisp.pl?gene=CAMKK2   |
| HLCS     | Holocarboxylase Synthetase                                                | Protein coding | 43 | GC21M036750 | 1.149623752 | https://www.genecards.org/cgi-bin/carddisp.pl?gene=HLCS     |
| SMTN     | Smoothelin                                                                | Protein coding | 38 | GC22P031167 | 1.14712739  | https://www.genecards.org/cgi-bin/carddisp.pl?gene=SMTN     |
| RHOD     | Ras Homolog Family Member D                                               | Protein coding | 39 | GC11P067069 | 1.146444201 | https://www.genecards.org/cgi-bin/carddisp.pl?gene=RHOD     |
| PPP1CA   | Protein Phosphatase 1 Catalytic Subunit $\alpha$                          | Protein coding | 48 | GC11M071828 | 1.145962    | https://www.genecards.org/cgi-bin/carddisp.pl?gene=PPP1CA   |
| NCF2     | Neutrophil Cytosolic Factor 2                                             | Protein coding | 47 | GC01M183555 | 1.145902753 | https://www.genecards.org/cgi-bin/carddisp.pl?gene=NCF2     |
| TPH1     | Tryptophan Hydroxylase 1                                                  | Protein coding | 44 | GC11M018040 | 1.145902753 | https://www.genecards.org/cgi-bin/carddisp.pl?gene=TPH1     |
| DUOX2    | Dual Oxidase 2                                                            | Protein coding | 43 | GC15M045092 | 1.145902753 | https://www.genecards.org/cgi-bin/carddisp.pl?gene=DUOX2    |
| RENBP    | Renin Binding Protein                                                     | Protein coding | 41 | GC0XM153935 | 1.145902753 | https://www.genecards.org/cgi-bin/carddisp.pl?gene=RENBP    |
| BSG      | Basigin (Ok Blood Group)                                                  | Protein coding | 43 | GC19P000571 | 1.14367044  | https://www.genecards.org/cgi-bin/carddisp.pl?gene=BSG      |
| GNRH1    | Gonadotropin Releasing Hormone 1                                          | Protein coding | 41 | GC08M025419 | 1.143300533 | https://www.genecards.org/cgi-bin/carddisp.pl?gene=GNRH1    |
| NAIP     | NLR Family Apoptosis Inhibitory Protein                                   | Protein coding | 40 | GC05M070968 | 1.142256737 | https://www.genecards.org/cgi-bin/carddisp.pl?gene=NAIP     |
| TRPC5    | Transient Receptor Potential Cation Channel Subfamily C Member 5          | Protein coding | 41 | GC0XM111774 | 1.141621828 | https://www.genecards.org/cgi-bin/carddisp.pl?gene=TRPC5    |
| EGFL7    | EGF Like Domain Multiple 7                                                | Protein coding | 40 | GC09P136658 | 1.139551163 | https://www.genecards.org/cgi-bin/carddisp.pl?gene=EGFL7    |
| ANKH     | ANKH Inorganic Pyrophosphate Transport Regulator                          | Protein coding | 41 | GC05M014706 | 1.139106154 | https://www.genecards.org/cgi-bin/carddisp.pl?gene=ANKH     |
| ERBB2    | Erb-B2 Receptor Tyrosine Kinase 2                                         | Protein coding | 53 | GC17P039687 | 1.134353161 | https://www.genecards.org/cgi-bin/carddisp.pl?gene=ERBB2    |
| QRSL1    | GlutaminyI-TRNA Amidotransferase Subunit QRSL1                            | Protein coding | 40 | GC06P106629 | 1.133800983 | https://www.genecards.org/cgi-bin/carddisp.pl?gene=QRSL1    |
| MAF      | MAF BZIP Transcription Factor                                             | Protein coding | 45 | GC16M079204 | 1.133171558 | https://www.genecards.org/cgi-bin/carddisp.pl?gene=MAF      |
| CLCNKB   | Chloride Voltage-Gated Channel Kb                                         | Protein coding | 44 | GC01P016043 | 1.133171558 | https://www.genecards.org/cgi-bin/carddisp.pl?gene=CLCNKB   |
| PRSS8    | Serine Protease 8                                                         | Protein coding | 44 | GC16M031822 | 1.133171558 | https://www.genecards.org/cgi-bin/carddisp.pl?gene=PRSS8    |
| KLK4     | Kallikrein Related Peptidase 4                                            | Protein coding | 42 | GC19M050957 | 1.133171558 | https://www.genecards.org/cgi-bin/carddisp.pl?gene=KLK4     |
| GAS5     | Growth Arrest Specific 5                                                  | RNA gene       | 23 | GC01M173947 | 1.133171558 | https://www.genecards.org/cgi-bin/carddisp.pl?gene=GAS5     |
| MIR590   | MicroRNA 590                                                              | RNA gene       | 19 | GC07P074191 | 1.133171558 | https://www.genecards.org/cgi-bin/carddisp.pl?gene=MIR590   |
| MIR296   | MicroRNA 296                                                              | RNA gene       | 18 | GC20M058817 | 1.133171558 | https://www.genecards.org/cgi-bin/carddisp.pl?gene=MIR296   |
| MIR92B   | MicroRNA 92b                                                              | RNA gene       | 17 | GC01P155195 | 1.133171558 | https://www.genecards.org/cgi-bin/carddisp.pl?gene=MIR92B   |
| MIR20A   | MicroRNA 20a                                                              | RNA gene       | 20 | GC13P091472 | 1.132478595 | https://www.genecards.org/cgi-bin/carddisp.pl?gene=MIR20A   |
| KEAP1    | Kelch Like ECH Associated Protein 1                                       | Protein coding | 48 | GC19M010486 | 1.130882382 | https://www.genecards.org/cgi-bin/carddisp.pl?gene=KEAP1    |
| CANX     | Calnexin                                                                  | Protein coding | 44 | GC05P179678 | 1.129682302 | https://www.genecards.org/cgi-bin/carddisp.pl?gene=CANX     |
| FLOT1    | Flotillin 1                                                               | Protein coding | 41 | GC06M049044 | 1.12947011  | https://www.genecards.org/cgi-bin/carddisp.pl?gene=FLOT1    |
| ISL1     | ISL LIM Homeobox 1                                                        | Protein coding | 46 | GC05P051383 | 1.126309395 | https://www.genecards.org/cgi-bin/carddisp.pl?gene=ISL1     |
| PEA15    | Proliferation And Apoptosis Adaptor Protein 15                            | Protein coding | 43 | GC01P160205 | 1.124965906 | https://www.genecards.org/cgi-bin/carddisp.pl?gene=PEA15    |
| PDE3B    | Phosphodiesterase 3B                                                      | Protein coding | 44 | GC11P014643 | 1.123605251 | https://www.genecards.org/cgi-bin/carddisp.pl?gene=PDE3B    |
| IKBKG    | Inhibitor Of Nuclear Factor $\kappa$ B Kinase Regulatory Subunit $\gamma$ | Protein coding | 48 | GC0XP154541 | 1.123007774 | https://www.genecards.org/cgi-bin/carddisp.pl?gene=IKBKG    |
| ATF2     | Activating Transcription Factor 2                                         | Protein coding | 46 | GC02M175072 | 1.120501757 | https://www.genecards.org/cgi-bin/carddisp.pl?gene=ATF2     |
| SERPINF1 | Serpin Family F Member 1                                                  | Protein coding | 44 | GC17P001761 | 1.112274885 | https://www.genecards.org/cgi-bin/carddisp.pl?gene=SERPINF1 |
| PLA2G10  | Phospholipase A2 Group X                                                  | Protein coding | 43 | GC16M014672 | 1.109012246 | https://www.genecards.org/cgi-bin/carddisp.pl?gene=PLA2G10  |
| ADM2     | Adrenomedullin 2                                                          | Protein coding | 34 | GC22P050481 | 1.107417583 | https://www.genecards.org/cgi-bin/carddisp.pl?gene=ADM2     |
| PRDX5    | Peroxioredoxin 5                                                          | Protein coding | 45 | GC11P064317 | 1.105743051 | https://www.genecards.org/cgi-bin/carddisp.pl?gene=PRDX5    |
| SCG2     | Secretogranin II                                                          | Protein coding | 39 | GC02M223596 | 1.105331063 | https://www.genecards.org/cgi-bin/carddisp.pl?gene=SCG2     |
| TLR6     | Toll Like Receptor 6                                                      | Protein coding | 43 | GC04M038828 | 1.101300478 | https://www.genecards.org/cgi-bin/carddisp.pl?gene=TLR6     |
| STIP1    | Stress Induced Phosphoprotein 1                                           | Protein coding | 44 | GC11P064204 | 1.100668192 | https://www.genecards.org/cgi-bin/carddisp.pl?gene=STIP1    |
| CALB2    | Calbindin 2                                                               | Protein coding | 40 | GC16P071392 | 1.098371387 | https://www.genecards.org/cgi-bin/carddisp.pl?gene=CALB2    |
| RPS6KA1  | Ribosomal Protein S6 Kinase A1                                            | Protein coding | 50 | GC01P026540 | 1.096489668 | https://www.genecards.org/cgi-bin/carddisp.pl?gene=RPS6KA1  |
| ACADSB   | Acyl-CoA Dehydrogenase Short/Branched Chain                               | Protein coding | 46 | GC10P123008 | 1.096489668 | https://www.genecards.org/cgi-bin/carddisp.pl?gene=ACADSB   |
| BCKDK    | Branched Chain Keto Acid Dehydrogenase Kinase                             | Protein coding | 46 | GC16P033514 | 1.096489668 | https://www.genecards.org/cgi-bin/carddisp.pl?gene=BCKDK    |
| TFAP2B   | Transcription Factor AP-2 $\beta$                                         | Protein coding | 44 | GC06P058577 | 1.096489668 | https://www.genecards.org/cgi-bin/carddisp.pl?gene=TFAP2B   |
| FBL      | Fibrillarin                                                               | Protein coding | 43 | GC19M039834 | 1.096489668 | https://www.genecards.org/cgi-bin/carddisp.pl?gene=FBL      |
| HIBCH    | 3-Hydroxyisobutyryl-CoA Hydrolase                                         | Protein coding | 43 | GC02M190189 | 1.096489668 | https://www.genecards.org/cgi-bin/carddisp.pl?gene=HIBCH    |
| HTRA2    | HtrA Serine Peptidase 2                                                   | Protein coding | 46 | GC02P074529 | 1.096278906 | https://www.genecards.org/cgi-bin/carddisp.pl?gene=HTRA2    |

|          |                                                                                 |                |    |             |             |                                                                                                                                       |
|----------|---------------------------------------------------------------------------------|----------------|----|-------------|-------------|---------------------------------------------------------------------------------------------------------------------------------------|
| FKBP1A   | FKBP Prolyl Isomerase 1A                                                        | Protein coding | 45 | GC20M001369 | 1.09601593  | <a href="https://www.genecards.org/cgi-bin/carddisp.pl?gene=FKBP1A">https://www.genecards.org/cgi-bin/carddisp.pl?gene=FKBP1A</a>     |
| UTS2R    | Urotensin 2 Receptor                                                            | Protein coding | 42 | GC17P082374 | 1.095595837 | <a href="https://www.genecards.org/cgi-bin/carddisp.pl?gene=UTS2R">https://www.genecards.org/cgi-bin/carddisp.pl?gene=UTS2R</a>       |
| ADRA1D   | Adrenoceptor $\alpha$ 1D                                                        | Protein coding | 46 | GC20M004220 | 1.09508574  | <a href="https://www.genecards.org/cgi-bin/carddisp.pl?gene=ADRA1D">https://www.genecards.org/cgi-bin/carddisp.pl?gene=ADRA1D</a>     |
| SLC22A12 | Solute Carrier Family 22 Member 12                                              | Protein coding | 44 | GC11P064609 | 1.09508574  | <a href="https://www.genecards.org/cgi-bin/carddisp.pl?gene=SLC22A12">https://www.genecards.org/cgi-bin/carddisp.pl?gene=SLC22A12</a> |
| SCN11A   | Sodium Voltage-Gated Channel $\alpha$ Subunit 11                                | Protein coding | 41 | GC03M038862 | 1.09508574  | <a href="https://www.genecards.org/cgi-bin/carddisp.pl?gene=SCN11A">https://www.genecards.org/cgi-bin/carddisp.pl?gene=SCN11A</a>     |
| LIPN     | Lipase Family Member N                                                          | Protein coding | 36 | GC10P088760 | 1.09508574  | <a href="https://www.genecards.org/cgi-bin/carddisp.pl?gene=LIPN">https://www.genecards.org/cgi-bin/carddisp.pl?gene=LIPN</a>         |
| MIR520A  | MicroRNA 520a                                                                   | RNA gene       | 18 | GC19P053690 | 1.09508574  | <a href="https://www.genecards.org/cgi-bin/carddisp.pl?gene=MIR520A">https://www.genecards.org/cgi-bin/carddisp.pl?gene=MIR520A</a>   |
| CBSL     | Cystathionine $\beta$ -Synthase Like                                            | Protein coding | 14 | GC21M006445 | 1.09508574  | <a href="https://www.genecards.org/cgi-bin/carddisp.pl?gene=CBSL">https://www.genecards.org/cgi-bin/carddisp.pl?gene=CBSL</a>         |
| TRAP1    | TNF Receptor Associated Protein 1                                               | Protein coding | 43 | GC16M004000 | 1.095022082 | <a href="https://www.genecards.org/cgi-bin/carddisp.pl?gene=TRAP1">https://www.genecards.org/cgi-bin/carddisp.pl?gene=TRAP1</a>       |
| GCDH     | Glutaryl-CoA Dehydrogenase                                                      | Protein coding | 46 | GC19P012891 | 1.094780922 | <a href="https://www.genecards.org/cgi-bin/carddisp.pl?gene=GCDH">https://www.genecards.org/cgi-bin/carddisp.pl?gene=GCDH</a>         |
| CACNB4   | Calcium Voltage-Gated Channel Auxiliary Subunit $\beta$ 4                       | Protein coding | 46 | GC02M151832 | 1.094696283 | <a href="https://www.genecards.org/cgi-bin/carddisp.pl?gene=CACNB4">https://www.genecards.org/cgi-bin/carddisp.pl?gene=CACNB4</a>     |
| KCNA1    | Potassium Voltage-Gated Channel Subfamily A Member 1                            | Protein coding | 45 | GC12P013111 | 1.094696283 | <a href="https://www.genecards.org/cgi-bin/carddisp.pl?gene=KCNA1">https://www.genecards.org/cgi-bin/carddisp.pl?gene=KCNA1</a>       |
| CYP27B1  | Cytochrome P450 Family 27 Subfamily B Member 1                                  | Protein coding | 47 | GC12M057757 | 1.090354204 | <a href="https://www.genecards.org/cgi-bin/carddisp.pl?gene=CYP27B1">https://www.genecards.org/cgi-bin/carddisp.pl?gene=CYP27B1</a>   |
| EPHX1    | Epoxide Hydrolase 1                                                             | Protein coding | 46 | GC01P225810 | 1.089499593 | <a href="https://www.genecards.org/cgi-bin/carddisp.pl?gene=EPHX1">https://www.genecards.org/cgi-bin/carddisp.pl?gene=EPHX1</a>       |
| FAIM2    | Fas Apoptotic Inhibitory Molecule 2                                             | Protein coding | 36 | GC12M049866 | 1.088947892 | <a href="https://www.genecards.org/cgi-bin/carddisp.pl?gene=FAIM2">https://www.genecards.org/cgi-bin/carddisp.pl?gene=FAIM2</a>       |
| HADHB    | Hydroxyacyl-CoA Dehydrogenase Trifunctional Multienzyme Complex Subunit $\beta$ | Protein coding | 47 | GC02P026243 | 1.087848306 | <a href="https://www.genecards.org/cgi-bin/carddisp.pl?gene=HADHB">https://www.genecards.org/cgi-bin/carddisp.pl?gene=HADHB</a>       |
| STC1     | Stanniocalcin 1                                                                 | Protein coding | 40 | GC08M023841 | 1.087613583 | <a href="https://www.genecards.org/cgi-bin/carddisp.pl?gene=STC1">https://www.genecards.org/cgi-bin/carddisp.pl?gene=STC1</a>         |
| PLOD2    | Procollagen-Lysine, 2-Oxoglutarate 5-Dioxygenase 2                              | Protein coding | 45 | GC03M146069 | 1.086079121 | <a href="https://www.genecards.org/cgi-bin/carddisp.pl?gene=PLOD2">https://www.genecards.org/cgi-bin/carddisp.pl?gene=PLOD2</a>       |
| MCEE     | Methylmalonyl-CoA Epimerase                                                     | Protein coding | 42 | GC02M071110 | 1.086079121 | <a href="https://www.genecards.org/cgi-bin/carddisp.pl?gene=MCEE">https://www.genecards.org/cgi-bin/carddisp.pl?gene=MCEE</a>         |
| SLC2A13  | Solute Carrier Family 2 Member 13                                               | Protein coding | 41 | GC12M039755 | 1.086079121 | <a href="https://www.genecards.org/cgi-bin/carddisp.pl?gene=SLC2A13">https://www.genecards.org/cgi-bin/carddisp.pl?gene=SLC2A13</a>   |
| ABCB11   | ATP Binding Cassette Subfamily B Member 11                                      | Protein coding | 46 | GC02M168922 | 1.080634713 | <a href="https://www.genecards.org/cgi-bin/carddisp.pl?gene=ABCB11">https://www.genecards.org/cgi-bin/carddisp.pl?gene=ABCB11</a>     |
| OXTR     | Oxytocin Receptor                                                               | Protein coding | 46 | GC03M008767 | 1.077993512 | <a href="https://www.genecards.org/cgi-bin/carddisp.pl?gene=OXTR">https://www.genecards.org/cgi-bin/carddisp.pl?gene=OXTR</a>         |
| SLC7A7   | Solute Carrier Family 7 Member 7                                                | Protein coding | 46 | GC14M022773 | 1.076603293 | <a href="https://www.genecards.org/cgi-bin/carddisp.pl?gene=SLC7A7">https://www.genecards.org/cgi-bin/carddisp.pl?gene=SLC7A7</a>     |
| ANK1     | Ankyrin 1                                                                       | Protein coding | 43 | GC08M041653 | 1.076006413 | <a href="https://www.genecards.org/cgi-bin/carddisp.pl?gene=ANK1">https://www.genecards.org/cgi-bin/carddisp.pl?gene=ANK1</a>         |
| IDUA     | $\alpha$ -L-Iduronidase                                                         | Protein coding | 43 | GC04P000986 | 1.073258638 | <a href="https://www.genecards.org/cgi-bin/carddisp.pl?gene=IDUA">https://www.genecards.org/cgi-bin/carddisp.pl?gene=IDUA</a>         |
| MGAM     | Maltase-Glucoamylase                                                            | Protein coding | 41 | GC07P146237 | 1.073258638 | <a href="https://www.genecards.org/cgi-bin/carddisp.pl?gene=MGAM">https://www.genecards.org/cgi-bin/carddisp.pl?gene=MGAM</a>         |
| SIK2     | Salt Inducible Kinase 2                                                         | Protein coding | 44 | GC11P111640 | 1.071369529 | <a href="https://www.genecards.org/cgi-bin/carddisp.pl?gene=SIK2">https://www.genecards.org/cgi-bin/carddisp.pl?gene=SIK2</a>         |
| DUSP19   | Dual Specificity Phosphatase 19                                                 | Protein coding | 38 | GC02P183078 | 1.070658445 | <a href="https://www.genecards.org/cgi-bin/carddisp.pl?gene=DUSP19">https://www.genecards.org/cgi-bin/carddisp.pl?gene=DUSP19</a>     |
| SEMA3E   | Semaphorin 3E                                                                   | Protein coding | 43 | GC07M083363 | 1.069352627 | <a href="https://www.genecards.org/cgi-bin/carddisp.pl?gene=SEMA3E">https://www.genecards.org/cgi-bin/carddisp.pl?gene=SEMA3E</a>     |
| KAT2B    | Lysine Acetyltransferase 2B                                                     | Protein coding | 48 | GC03P020043 | 1.068448901 | <a href="https://www.genecards.org/cgi-bin/carddisp.pl?gene=KAT2B">https://www.genecards.org/cgi-bin/carddisp.pl?gene=KAT2B</a>       |
| PLCB4    | Phospholipase C $\beta$ 4                                                       | Protein coding | 47 | GC20P009024 | 1.068448901 | <a href="https://www.genecards.org/cgi-bin/carddisp.pl?gene=PLCB4">https://www.genecards.org/cgi-bin/carddisp.pl?gene=PLCB4</a>       |
| DDX6     | DEAD-Box Helicase 6                                                             | Protein coding | 46 | GC11M118748 | 1.068448901 | <a href="https://www.genecards.org/cgi-bin/carddisp.pl?gene=DDX6">https://www.genecards.org/cgi-bin/carddisp.pl?gene=DDX6</a>         |
| WEE1     | WEE1 G2 Checkpoint Kinase                                                       | Protein coding | 46 | GC11P009573 | 1.068448901 | <a href="https://www.genecards.org/cgi-bin/carddisp.pl?gene=WEE1">https://www.genecards.org/cgi-bin/carddisp.pl?gene=WEE1</a>         |
| FZD1     | Frizzled Class Receptor 1                                                       | Protein coding | 45 | GC07P091264 | 1.068448901 | <a href="https://www.genecards.org/cgi-bin/carddisp.pl?gene=FZD1">https://www.genecards.org/cgi-bin/carddisp.pl?gene=FZD1</a>         |
| PIK3C2G  | Phosphatidylinositol-4-Phosphate 3-Kinase Catalytic Subunit Type 2 $\gamma$     | Protein coding | 45 | GC12P018242 | 1.068448901 | <a href="https://www.genecards.org/cgi-bin/carddisp.pl?gene=PIK3C2G">https://www.genecards.org/cgi-bin/carddisp.pl?gene=PIK3C2G</a>   |
| RHAG     | Rh Associated Glycoprotein                                                      | Protein coding | 45 | GC06M049605 | 1.068448901 | <a href="https://www.genecards.org/cgi-bin/carddisp.pl?gene=RHAG">https://www.genecards.org/cgi-bin/carddisp.pl?gene=RHAG</a>         |
| DHX38    | DEAH-Box Helicase 38                                                            | Protein coding | 44 | GC16P072127 | 1.068448901 | <a href="https://www.genecards.org/cgi-bin/carddisp.pl?gene=DHX38">https://www.genecards.org/cgi-bin/carddisp.pl?gene=DHX38</a>       |
| SLC36A2  | Solute Carrier Family 36 Member 2                                               | Protein coding | 44 | GC05M151309 | 1.068448901 | <a href="https://www.genecards.org/cgi-bin/carddisp.pl?gene=SLC36A2">https://www.genecards.org/cgi-bin/carddisp.pl?gene=SLC36A2</a>   |
| STK38    | Serine/Threonine Kinase 38                                                      | Protein coding | 44 | GC06M036493 | 1.068448901 | <a href="https://www.genecards.org/cgi-bin/carddisp.pl?gene=STK38">https://www.genecards.org/cgi-bin/carddisp.pl?gene=STK38</a>       |
| SLC14A1  | Solute Carrier Family 14 Member 1 (Kidd Blood Group)                            | Protein coding | 44 | GC18P045687 | 1.068448901 | <a href="https://www.genecards.org/cgi-bin/carddisp.pl?gene=SLC14A1">https://www.genecards.org/cgi-bin/carddisp.pl?gene=SLC14A1</a>   |
| TNFRSF21 | TNF Receptor Superfamily Member 21                                              | Protein coding | 44 | GC06M047231 | 1.068448901 | <a href="https://www.genecards.org/cgi-bin/carddisp.pl?gene=TNFRSF21">https://www.genecards.org/cgi-bin/carddisp.pl?gene=TNFRSF21</a> |
| ATP6V1G3 | ATPase H+-Transporting V1 Subunit G3                                            | Protein coding | 43 | GC01M198492 | 1.068448901 | <a href="https://www.genecards.org/cgi-bin/carddisp.pl?gene=ATP6V1G3">https://www.genecards.org/cgi-bin/carddisp.pl?gene=ATP6V1G3</a> |
| EIF4A3   | Eukaryotic Translation Initiation Factor 4A3                                    | Protein coding | 43 | GC17M080135 | 1.068448901 | <a href="https://www.genecards.org/cgi-bin/carddisp.pl?gene=EIF4A3">https://www.genecards.org/cgi-bin/carddisp.pl?gene=EIF4A3</a>     |
| GDA      | Guanine Deaminase                                                               | Protein coding | 43 | GC09P072114 | 1.068448901 | <a href="https://www.genecards.org/cgi-bin/carddisp.pl?gene=GDA">https://www.genecards.org/cgi-bin/carddisp.pl?gene=GDA</a>           |
| PDE9A    | Phosphodiesterase 9A                                                            | Protein coding | 43 | GC21P042653 | 1.068448901 | <a href="https://www.genecards.org/cgi-bin/carddisp.pl?gene=PDE9A">https://www.genecards.org/cgi-bin/carddisp.pl?gene=PDE9A</a>       |
| SFRP4    | Secreted Frizzled Related Protein 4                                             | Protein coding | 43 | GC07M037912 | 1.068448901 | <a href="https://www.genecards.org/cgi-bin/carddisp.pl?gene=SFRP4">https://www.genecards.org/cgi-bin/carddisp.pl?gene=SFRP4</a>       |
| PTPRT    | Protein Tyrosine Phosphatase Receptor Type T                                    | Protein coding | 43 | GC20M042072 | 1.068448901 | <a href="https://www.genecards.org/cgi-bin/carddisp.pl?gene=PTPRT">https://www.genecards.org/cgi-bin/carddisp.pl?gene=PTPRT</a>       |
| UAP1     | UDP-N-Acetylglucosamine Pyrophosphorylase 1                                     | Protein coding | 43 | GC01P162561 | 1.068448901 | <a href="https://www.genecards.org/cgi-bin/carddisp.pl?gene=UAP1">https://www.genecards.org/cgi-bin/carddisp.pl?gene=UAP1</a>         |
| AKAP8    | A-Kinase Anchoring Protein 8                                                    | Protein coding | 41 | GC19M015354 | 1.068448901 | <a href="https://www.genecards.org/cgi-bin/carddisp.pl?gene=AKAP8">https://www.genecards.org/cgi-bin/carddisp.pl?gene=AKAP8</a>       |
| CYTH1    | Cytohesin 1                                                                     | Protein coding | 41 | GC17M078674 | 1.068448901 | <a href="https://www.genecards.org/cgi-bin/carddisp.pl?gene=CYTH1">https://www.genecards.org/cgi-bin/carddisp.pl?gene=CYTH1</a>       |
| ARCN1    | Archain 1                                                                       | Protein coding | 41 | GC11P118572 | 1.068448901 | <a href="https://www.genecards.org/cgi-bin/carddisp.pl?gene=ARCN1">https://www.genecards.org/cgi-bin/carddisp.pl?gene=ARCN1</a>       |
| CPD      | Carboxypeptidase D                                                              | Protein coding | 41 | GC17P030378 | 1.068448901 | <a href="https://www.genecards.org/cgi-bin/carddisp.pl?gene=CPD">https://www.genecards.org/cgi-bin/carddisp.pl?gene=CPD</a>           |
| EED      | Embryonic Ectoderm Development                                                  | Protein coding | 41 | GC11P086244 | 1.068448901 | <a href="https://www.genecards.org/cgi-bin/carddisp.pl?gene=EED">https://www.genecards.org/cgi-bin/carddisp.pl?gene=EED</a>           |
| PSMB3    | Proteasome 20S Subunit $\beta$ 3                                                | Protein coding | 41 | GC17P038752 | 1.068448901 | <a href="https://www.genecards.org/cgi-bin/carddisp.pl?gene=PSMB3">https://www.genecards.org/cgi-bin/carddisp.pl?gene=PSMB3</a>       |
| KCNS3    | Potassium Voltage-Gated Channel Modifier Subfamily S Member 3                   | Protein coding | 41 | GC02P017877 | 1.068448901 | <a href="https://www.genecards.org/cgi-bin/carddisp.pl?gene=KCNS3">https://www.genecards.org/cgi-bin/carddisp.pl?gene=KCNS3</a>       |
| RFC4     | Replication Factor C Subunit 4                                                  | Protein coding | 41 | GC03M186789 | 1.068448901 | <a href="https://www.genecards.org/cgi-bin/carddisp.pl?gene=RFC4">https://www.genecards.org/cgi-bin/carddisp.pl?gene=RFC4</a>         |
| RNF8     | Ring Finger Protein 8                                                           | Protein coding | 41 | GC06P058470 | 1.068448901 | <a href="https://www.genecards.org/cgi-bin/carddisp.pl?gene=RNF8">https://www.genecards.org/cgi-bin/carddisp.pl?gene=RNF8</a>         |
| WNT9B    | Wnt Family Member 9B                                                            | Protein coding | 41 | GC17P046833 | 1.068448901 | <a href="https://www.genecards.org/cgi-bin/carddisp.pl?gene=WNT9B">https://www.genecards.org/cgi-bin/carddisp.pl?gene=WNT9B</a>       |
| CRISP2   | Cysteine Rich Secretory Protein 2                                               | Protein coding | 40 | GC06M050424 | 1.068448901 | <a href="https://www.genecards.org/cgi-bin/carddisp.pl?gene=CRISP2">https://www.genecards.org/cgi-bin/carddisp.pl?gene=CRISP2</a>     |
| GDI2     | GDP Dissociation Inhibitor 2                                                    | Protein coding | 40 | GC10M005765 | 1.068448901 | <a href="https://www.genecards.org/cgi-bin/carddisp.pl?gene=GDI2">https://www.genecards.org/cgi-bin/carddisp.pl?gene=GDI2</a>         |
| POP1     | POP1 Homolog, Ribonuclease P/MRP Subunit                                        | Protein coding | 40 | GC08P098117 | 1.068448901 | <a href="https://www.genecards.org/cgi-bin/carddisp.pl?gene=POP1">https://www.genecards.org/cgi-bin/carddisp.pl?gene=POP1</a>         |
| MKRN1    | Makorin Ring Finger Protein 1                                                   | Protein coding | 40 | GC07M140453 | 1.068448901 | <a href="https://www.genecards.org/cgi-bin/carddisp.pl?gene=MKRN1">https://www.genecards.org/cgi-bin/carddisp.pl?gene=MKRN1</a>       |
| NCAM2    | Neural Cell Adhesion Molecule 2                                                 | Protein coding | 40 | GC21P020998 | 1.068448901 | <a href="https://www.genecards.org/cgi-bin/carddisp.pl?gene=NCAM2">https://www.genecards.org/cgi-bin/carddisp.pl?gene=NCAM2</a>       |
| USP28    | Ubiquitin Specific Peptidase 28                                                 | Protein coding | 40 | GC11M113797 | 1.068448901 | <a href="https://www.genecards.org/cgi-bin/carddisp.pl?gene=USP28">https://www.genecards.org/cgi-bin/carddisp.pl?gene=USP28</a>       |
| RPH3A    | Rabphilin 3A                                                                    | Protein coding | 40 | GC12P112570 | 1.068448901 | <a href="https://www.genecards.org/cgi-bin/carddisp.pl?gene=RPH3A">https://www.genecards.org/cgi-bin/carddisp.pl?gene=RPH3A</a>       |
| SWAP70   | Switching B Cell Complex Subunit SWAP70                                         | Protein coding | 40 | GC11P009664 | 1.068448901 | <a href="https://www.genecards.org/cgi-bin/carddisp.pl?gene=SWAP70">https://www.genecards.org/cgi-bin/carddisp.pl?gene=SWAP70</a>     |
| AMBN     | Ameloblastin                                                                    | Protein coding | 39 | GC04P070593 | 1.068448901 | <a href="https://www.genecards.org/cgi-bin/carddisp.pl?gene=AMBN">https://www.genecards.org/cgi-bin/carddisp.pl?gene=AMBN</a>         |
| CXCL6    | C-X-C Motif Chemokine Ligand 6                                                  | Protein coding | 39 | GC04P073837 | 1.068448901 | <a href="https://www.genecards.org/cgi-bin/carddisp.pl?gene=CXCL6">https://www.genecards.org/cgi-bin/carddisp.pl?gene=CXCL6</a>       |
| FRMD6    | FERM Domain Containing 6                                                        | Protein coding | 39 | GC14P051489 | 1.068448901 | <a href="https://www.genecards.org/cgi-bin/carddisp.pl?gene=FRMD6">https://www.genecards.org/cgi-bin/carddisp.pl?gene=FRMD6</a>       |
| NPLOC4   | NPL4 Homolog, Ubiquitin Recognition Factor                                      | Protein coding | 39 | GC17M081556 | 1.068448901 | <a href="https://www.genecards.org/cgi-bin/carddisp.pl?gene=NPLOC4">https://www.genecards.org/cgi-bin/carddisp.pl?gene=NPLOC4</a>     |
| PLCH2    | Phospholipase C Eta 2                                                           | Protein coding | 39 | GC01P002421 | 1.068448901 | <a href="https://www.genecards.org/cgi-bin/carddisp.pl?gene=PLCH2">https://www.genecards.org/cgi-bin/carddisp.pl?gene=PLCH2</a>       |
| ZNF143   | Zinc Finger Protein 143                                                         | Protein coding | 39 | GC11P009483 | 1.068448901 | <a href="https://www.genecards.org/cgi-bin/carddisp.pl?gene=ZNF143">https://www.genecards.org/cgi-bin/carddisp.pl?gene=ZNF143</a>     |
| DEFA5    | Defensin $\alpha$ 5                                                             | Protein coding | 38 | GC08M007057 | 1.068448901 | <a href="https://www.genecards.org/cgi-bin/carddisp.pl?gene=DEFA5">https://www.genecards.org/cgi-bin/carddisp.pl?gene=DEFA5</a>       |
| FCRL5    | Fc Receptor Like 5                                                              | Protein coding | 38 | GC01M157514 | 1.068448901 | <a href="https://www.genecards.org/cgi-bin/carddisp.pl?gene=FCRL5">https://www.genecards.org/cgi-bin/carddisp.pl?gene=FCRL5</a>       |
| ENAM     | Enamelin                                                                        | Protein coding | 38 | GC04P070628 | 1.068448901 | <a href="https://www.genecards.org/cgi-bin/carddisp.pl?gene=ENAM">https://www.genecards.org/cgi-bin/carddisp.pl?gene=ENAM</a>         |
| HOXD8    | Homeobox D8                                                                     | Protein coding | 38 | GC02P176129 | 1.068448901 | <a href="https://www.genecards.org/cgi-bin/carddisp.pl?gene=HOXD8">https://www.genecards.org/cgi-bin/carddisp.pl?gene=HOXD8</a>       |

|          |                                                         |                |    |             |             |                                                                                                                                       |
|----------|---------------------------------------------------------|----------------|----|-------------|-------------|---------------------------------------------------------------------------------------------------------------------------------------|
| HMGN2    | High Mobility Group Nucleosomal Binding Domain 2        | Protein coding | 38 | GC01P026473 | 1.068448901 | <a href="https://www.genecards.org/cgi-bin/carddisp.pl?gene=HMGN2">https://www.genecards.org/cgi-bin/carddisp.pl?gene=HMGN2</a>       |
| FOXP4    | Forkhead Box P4                                         | Protein coding | 38 | GC06P058496 | 1.068448901 | <a href="https://www.genecards.org/cgi-bin/carddisp.pl?gene=FOXP4">https://www.genecards.org/cgi-bin/carddisp.pl?gene=FOXP4</a>       |
| NAALAD2  | N-Acetylated $\alpha$ -Linked Acidic Dipeptidase 2      | Protein coding | 38 | GC11P090131 | 1.068448901 | <a href="https://www.genecards.org/cgi-bin/carddisp.pl?gene=NAALAD2">https://www.genecards.org/cgi-bin/carddisp.pl?gene=NAALAD2</a>   |
| NLRP5    | NLR Family Pyrin Domain Containing 5                    | Protein coding | 38 | GC19P057072 | 1.068448901 | <a href="https://www.genecards.org/cgi-bin/carddisp.pl?gene=NLRP5">https://www.genecards.org/cgi-bin/carddisp.pl?gene=NLRP5</a>       |
| MYRIP    | Myosin VIIA And Rab Interacting Protein                 | Protein coding | 38 | GC03P039826 | 1.068448901 | <a href="https://www.genecards.org/cgi-bin/carddisp.pl?gene=MYRIP">https://www.genecards.org/cgi-bin/carddisp.pl?gene=MYRIP</a>       |
| OSBPL1A  | Oxysterol Binding Protein Like 1A                       | Protein coding | 38 | GC18M024162 | 1.068448901 | <a href="https://www.genecards.org/cgi-bin/carddisp.pl?gene=OSBPL1A">https://www.genecards.org/cgi-bin/carddisp.pl?gene=OSBPL1A</a>   |
| NAPB     | NSF Attachment Protein $\beta$                          | Protein coding | 38 | GC20M023374 | 1.068448901 | <a href="https://www.genecards.org/cgi-bin/carddisp.pl?gene=NAPB">https://www.genecards.org/cgi-bin/carddisp.pl?gene=NAPB</a>         |
| RPS25    | Ribosomal Protein S25                                   | Protein coding | 38 | GC11M119015 | 1.068448901 | <a href="https://www.genecards.org/cgi-bin/carddisp.pl?gene=RPS25">https://www.genecards.org/cgi-bin/carddisp.pl?gene=RPS25</a>       |
| SLC26A11 | Solute Carrier Family 26 Member 11                      | Protein coding | 38 | GC17P080219 | 1.068448901 | <a href="https://www.genecards.org/cgi-bin/carddisp.pl?gene=SLC26A11">https://www.genecards.org/cgi-bin/carddisp.pl?gene=SLC26A11</a> |
| WDR4     | WD Repeat Domain 4                                      | Protein coding | 38 | GC21M042843 | 1.068448901 | <a href="https://www.genecards.org/cgi-bin/carddisp.pl?gene=WDR4">https://www.genecards.org/cgi-bin/carddisp.pl?gene=WDR4</a>         |
| TMOD4    | Tropomodulin 4                                          | Protein coding | 38 | GC01M151169 | 1.068448901 | <a href="https://www.genecards.org/cgi-bin/carddisp.pl?gene=TMOD4">https://www.genecards.org/cgi-bin/carddisp.pl?gene=TMOD4</a>       |
| USP46    | Ubiquitin Specific Peptidase 46                         | Protein coding | 38 | GC04M052590 | 1.068448901 | <a href="https://www.genecards.org/cgi-bin/carddisp.pl?gene=USP46">https://www.genecards.org/cgi-bin/carddisp.pl?gene=USP46</a>       |
| ANO2     | Anoctamin 2                                             | Protein coding | 37 | GC12M005532 | 1.068448901 | <a href="https://www.genecards.org/cgi-bin/carddisp.pl?gene=ANO2">https://www.genecards.org/cgi-bin/carddisp.pl?gene=ANO2</a>         |
| CCL1     | C-C Motif Chemokine Ligand 1                            | Protein coding | 37 | GC17M034422 | 1.068448901 | <a href="https://www.genecards.org/cgi-bin/carddisp.pl?gene=CCL1">https://www.genecards.org/cgi-bin/carddisp.pl?gene=CCL1</a>         |
| DEFA4    | Defensin $\alpha$ 4                                     | Protein coding | 37 | GC08M006935 | 1.068448901 | <a href="https://www.genecards.org/cgi-bin/carddisp.pl?gene=DEFA4">https://www.genecards.org/cgi-bin/carddisp.pl?gene=DEFA4</a>       |
| ARHGAP21 | Rho GTPase Activating Protein 21                        | Protein coding | 37 | GC10M024583 | 1.068448901 | <a href="https://www.genecards.org/cgi-bin/carddisp.pl?gene=ARHGAP21">https://www.genecards.org/cgi-bin/carddisp.pl?gene=ARHGAP21</a> |
| CTR9     | CTR9 Homolog, Paf1/RNA Polymerase II Complex Component  | Protein coding | 37 | GC11P010772 | 1.068448901 | <a href="https://www.genecards.org/cgi-bin/carddisp.pl?gene=CTR9">https://www.genecards.org/cgi-bin/carddisp.pl?gene=CTR9</a>         |
| IRX2     | Iroquois Homeobox 2                                     | Protein coding | 37 | GC05M002708 | 1.068448901 | <a href="https://www.genecards.org/cgi-bin/carddisp.pl?gene=IRX2">https://www.genecards.org/cgi-bin/carddisp.pl?gene=IRX2</a>         |
| NTPCR    | Nucleoside-Triphosphatase, Cancer-Related               | Protein coding | 37 | GC01P232950 | 1.068448901 | <a href="https://www.genecards.org/cgi-bin/carddisp.pl?gene=NTPCR">https://www.genecards.org/cgi-bin/carddisp.pl?gene=NTPCR</a>       |
| SDR16C5  | Short Chain Dehydrogenase/Reductase Family 16C Member 5 | Protein coding | 37 | GC08M056300 | 1.068448901 | <a href="https://www.genecards.org/cgi-bin/carddisp.pl?gene=SDR16C5">https://www.genecards.org/cgi-bin/carddisp.pl?gene=SDR16C5</a>   |
| SLC37A3  | Solute Carrier Family 37 Member 3                       | Protein coding | 37 | GC07M140293 | 1.068448901 | <a href="https://www.genecards.org/cgi-bin/carddisp.pl?gene=SLC37A3">https://www.genecards.org/cgi-bin/carddisp.pl?gene=SLC37A3</a>   |
| PRCC     | Proline Rich Mitotic Checkpoint Control Factor          | Protein coding | 37 | GC01P156750 | 1.068448901 | <a href="https://www.genecards.org/cgi-bin/carddisp.pl?gene=PRCC">https://www.genecards.org/cgi-bin/carddisp.pl?gene=PRCC</a>         |
| ADAMTSL3 | ADAMTS Like 3                                           | Protein coding | 36 | GC15P083655 | 1.068448901 | <a href="https://www.genecards.org/cgi-bin/carddisp.pl?gene=ADAMTSL3">https://www.genecards.org/cgi-bin/carddisp.pl?gene=ADAMTSL3</a> |
| BRPF3    | Bromodomain And PHD Finger Containing 3                 | Protein coding | 36 | GC06P058453 | 1.068448901 | <a href="https://www.genecards.org/cgi-bin/carddisp.pl?gene=BRPF3">https://www.genecards.org/cgi-bin/carddisp.pl?gene=BRPF3</a>       |
| ETV7     | ETS Variant Transcription Factor 7                      | Protein coding | 36 | GC06M049265 | 1.068448901 | <a href="https://www.genecards.org/cgi-bin/carddisp.pl?gene=ETV7">https://www.genecards.org/cgi-bin/carddisp.pl?gene=ETV7</a>         |
| COPS8    | COP9 Signalosome Subunit 8                              | Protein coding | 36 | GC02P237085 | 1.068448901 | <a href="https://www.genecards.org/cgi-bin/carddisp.pl?gene=COPS8">https://www.genecards.org/cgi-bin/carddisp.pl?gene=COPS8</a>       |
| FGD6     | FYVE, RhoGEF And PH Domain Containing 6                 | Protein coding | 36 | GC12M095076 | 1.068448901 | <a href="https://www.genecards.org/cgi-bin/carddisp.pl?gene=FGD6">https://www.genecards.org/cgi-bin/carddisp.pl?gene=FGD6</a>         |
| GLTP     | Glycolipid Transfer Protein                             | Protein coding | 36 | GC12M109850 | 1.068448901 | <a href="https://www.genecards.org/cgi-bin/carddisp.pl?gene=GLTP">https://www.genecards.org/cgi-bin/carddisp.pl?gene=GLTP</a>         |
| ZNF77    | Zinc Finger Protein 77                                  | Protein coding | 36 | GC19M002933 | 1.068448901 | <a href="https://www.genecards.org/cgi-bin/carddisp.pl?gene=ZNF77">https://www.genecards.org/cgi-bin/carddisp.pl?gene=ZNF77</a>       |
| PGLYRP3  | Peptidoglycan Recognition Protein 3                     | Protein coding | 36 | GC01M153297 | 1.068448901 | <a href="https://www.genecards.org/cgi-bin/carddisp.pl?gene=PGLYRP3">https://www.genecards.org/cgi-bin/carddisp.pl?gene=PGLYRP3</a>   |
| PI16     | Peptidase Inhibitor 16                                  | Protein coding | 36 | GC06P058466 | 1.068448901 | <a href="https://www.genecards.org/cgi-bin/carddisp.pl?gene=PI16">https://www.genecards.org/cgi-bin/carddisp.pl?gene=PI16</a>         |
| MPHOSPH6 | M-Phase Phosphoprotein 6                                | Protein coding | 36 | GC16M082181 | 1.068448901 | <a href="https://www.genecards.org/cgi-bin/carddisp.pl?gene=MPHOSPH6">https://www.genecards.org/cgi-bin/carddisp.pl?gene=MPHOSPH6</a> |
| PHLDB1   | Pleckstrin Homology Like Domain Family B Member 1       | Protein coding | 36 | GC11P118606 | 1.068448901 | <a href="https://www.genecards.org/cgi-bin/carddisp.pl?gene=PHLDB1">https://www.genecards.org/cgi-bin/carddisp.pl?gene=PHLDB1</a>     |
| UPK2     | Uroplakin 2                                             | Protein coding | 36 | GC11P118925 | 1.068448901 | <a href="https://www.genecards.org/cgi-bin/carddisp.pl?gene=UPK2">https://www.genecards.org/cgi-bin/carddisp.pl?gene=UPK2</a>         |
| ONECUT2  | One Cut Homeobox 2                                      | Protein coding | 36 | GC18P057436 | 1.068448901 | <a href="https://www.genecards.org/cgi-bin/carddisp.pl?gene=ONECUT2">https://www.genecards.org/cgi-bin/carddisp.pl?gene=ONECUT2</a>   |
| SPINK7   | Serine Peptidase Inhibitor Kazal Type 7                 | Protein coding | 36 | GC05P148312 | 1.068448901 | <a href="https://www.genecards.org/cgi-bin/carddisp.pl?gene=SPINK7">https://www.genecards.org/cgi-bin/carddisp.pl?gene=SPINK7</a>     |
| TMEM132E | Transmembrane Protein 132E                              | Protein coding | 36 | GC17P034580 | 1.068448901 | <a href="https://www.genecards.org/cgi-bin/carddisp.pl?gene=TMEM132E">https://www.genecards.org/cgi-bin/carddisp.pl?gene=TMEM132E</a> |
| VAT1L    | Vesicle Amine Transport 1 Like                          | Protein coding | 36 | GC16P077788 | 1.068448901 | <a href="https://www.genecards.org/cgi-bin/carddisp.pl?gene=VAT1L">https://www.genecards.org/cgi-bin/carddisp.pl?gene=VAT1L</a>       |
| ETV3     | ETS Variant Transcription Factor 3                      | Protein coding | 35 | GC01M157121 | 1.068448901 | <a href="https://www.genecards.org/cgi-bin/carddisp.pl?gene=ETV3">https://www.genecards.org/cgi-bin/carddisp.pl?gene=ETV3</a>         |
| FOXR1    | Forkhead Box R1                                         | Protein coding | 35 | GC11P118971 | 1.068448901 | <a href="https://www.genecards.org/cgi-bin/carddisp.pl?gene=FOXR1">https://www.genecards.org/cgi-bin/carddisp.pl?gene=FOXR1</a>       |
| HOXD1    | Homeobox D1                                             | Protein coding | 35 | GC02P176198 | 1.068448901 | <a href="https://www.genecards.org/cgi-bin/carddisp.pl?gene=HOXD1">https://www.genecards.org/cgi-bin/carddisp.pl?gene=HOXD1</a>       |
| HINFP    | Histone H4 Transcription Factor                         | Protein coding | 35 | GC11P119121 | 1.068448901 | <a href="https://www.genecards.org/cgi-bin/carddisp.pl?gene=HINFP">https://www.genecards.org/cgi-bin/carddisp.pl?gene=HINFP</a>       |
| PDZRN4   | PDZ Domain Containing Ring Finger 4                     | Protein coding | 35 | GC12P041188 | 1.068448901 | <a href="https://www.genecards.org/cgi-bin/carddisp.pl?gene=PDZRN4">https://www.genecards.org/cgi-bin/carddisp.pl?gene=PDZRN4</a>     |
| NRIP3    | Nuclear Receptor Interacting Protein 3                  | Protein coding | 35 | GC11M009001 | 1.068448901 | <a href="https://www.genecards.org/cgi-bin/carddisp.pl?gene=NRIP3">https://www.genecards.org/cgi-bin/carddisp.pl?gene=NRIP3</a>       |
| USP38    | Ubiquitin Specific Peptidase 38                         | Protein coding | 35 | GC04P143184 | 1.068448901 | <a href="https://www.genecards.org/cgi-bin/carddisp.pl?gene=USP38">https://www.genecards.org/cgi-bin/carddisp.pl?gene=USP38</a>       |
| RNF26    | Ring Finger Protein 26                                  | Protein coding | 35 | GC11P119334 | 1.068448901 | <a href="https://www.genecards.org/cgi-bin/carddisp.pl?gene=RNF26">https://www.genecards.org/cgi-bin/carddisp.pl?gene=RNF26</a>       |
| CCDC59   | Coiled-Coil Domain Containing 59                        | Protein coding | 34 | GC12M082223 | 1.068448901 | <a href="https://www.genecards.org/cgi-bin/carddisp.pl?gene=CCDC59">https://www.genecards.org/cgi-bin/carddisp.pl?gene=CCDC59</a>     |
| DTWD1    | DTW Domain Containing 1                                 | Protein coding | 34 | GC15P049620 | 1.068448901 | <a href="https://www.genecards.org/cgi-bin/carddisp.pl?gene=DTWD1">https://www.genecards.org/cgi-bin/carddisp.pl?gene=DTWD1</a>       |
| CMTR1    | Cap Methyltransferase 1                                 | Protein coding | 34 | GC06P058472 | 1.068448901 | <a href="https://www.genecards.org/cgi-bin/carddisp.pl?gene=CMTR1">https://www.genecards.org/cgi-bin/carddisp.pl?gene=CMTR1</a>       |
| BCL9L    | BCL9 Like                                               | Protein coding | 34 | GC11M118893 | 1.068448901 | <a href="https://www.genecards.org/cgi-bin/carddisp.pl?gene=BCL9L">https://www.genecards.org/cgi-bin/carddisp.pl?gene=BCL9L</a>       |
| CEP131   | Centrosomal Protein 131                                 | Protein coding | 34 | GC17M081189 | 1.068448901 | <a href="https://www.genecards.org/cgi-bin/carddisp.pl?gene=CEP131">https://www.genecards.org/cgi-bin/carddisp.pl?gene=CEP131</a>     |
| ZNHIT6   | Zinc Finger HIT-Type Containing 6                       | Protein coding | 34 | GC01M085649 | 1.068448901 | <a href="https://www.genecards.org/cgi-bin/carddisp.pl?gene=ZNHIT6">https://www.genecards.org/cgi-bin/carddisp.pl?gene=ZNHIT6</a>     |
| NIPAL2   | NIPA Like Domain Containing 2                           | Protein coding | 34 | GC08M098189 | 1.068448901 | <a href="https://www.genecards.org/cgi-bin/carddisp.pl?gene=NIPAL2">https://www.genecards.org/cgi-bin/carddisp.pl?gene=NIPAL2</a>     |
| TBCCD1   | TBCC Domain Containing 1                                | Protein coding | 34 | GC03M186547 | 1.068448901 | <a href="https://www.genecards.org/cgi-bin/carddisp.pl?gene=TBCCD1">https://www.genecards.org/cgi-bin/carddisp.pl?gene=TBCCD1</a>     |
| SIGLEC15 | Sialic Acid Binding Ig Like Lectin 15                   | Protein coding | 34 | GC18P045825 | 1.068448901 | <a href="https://www.genecards.org/cgi-bin/carddisp.pl?gene=SIGLEC15">https://www.genecards.org/cgi-bin/carddisp.pl?gene=SIGLEC15</a> |
| WIZ      | WIZ Zinc Finger                                         | Protein coding | 34 | GC19M015419 | 1.068448901 | <a href="https://www.genecards.org/cgi-bin/carddisp.pl?gene=WIZ">https://www.genecards.org/cgi-bin/carddisp.pl?gene=WIZ</a>           |
| RASAL3   | RAS Protein Activator Like 3                            | Protein coding | 34 | GC19M015451 | 1.068448901 | <a href="https://www.genecards.org/cgi-bin/carddisp.pl?gene=RASAL3">https://www.genecards.org/cgi-bin/carddisp.pl?gene=RASAL3</a>     |
| ZNF333   | Zinc Finger Protein 333                                 | Protein coding | 34 | GC19P014689 | 1.068448901 | <a href="https://www.genecards.org/cgi-bin/carddisp.pl?gene=ZNF333">https://www.genecards.org/cgi-bin/carddisp.pl?gene=ZNF333</a>     |
| AGMO     | Alkylglycerol Monooxygenase                             | Protein coding | 33 | GC07M015117 | 1.068448901 | <a href="https://www.genecards.org/cgi-bin/carddisp.pl?gene=AGMO">https://www.genecards.org/cgi-bin/carddisp.pl?gene=AGMO</a>         |
| C6orf89  | Chromosome 6 Open Reading Frame 89                      | Protein coding | 33 | GC06P058463 | 1.068448901 | <a href="https://www.genecards.org/cgi-bin/carddisp.pl?gene=C6orf89">https://www.genecards.org/cgi-bin/carddisp.pl?gene=C6orf89</a>   |
| C2CD2L   | C2CD2 Like                                              | Protein coding | 33 | GC11P119102 | 1.068448901 | <a href="https://www.genecards.org/cgi-bin/carddisp.pl?gene=C2CD2L">https://www.genecards.org/cgi-bin/carddisp.pl?gene=C2CD2L</a>     |
| GPATCH3  | G-Patch Domain Containing 3                             | Protein coding | 33 | GC01M026890 | 1.068448901 | <a href="https://www.genecards.org/cgi-bin/carddisp.pl?gene=GPATCH3">https://www.genecards.org/cgi-bin/carddisp.pl?gene=GPATCH3</a>   |
| ZNF516   | Zinc Finger Protein 516                                 | Protein coding | 33 | GC18M076357 | 1.068448901 | <a href="https://www.genecards.org/cgi-bin/carddisp.pl?gene=ZNF516">https://www.genecards.org/cgi-bin/carddisp.pl?gene=ZNF516</a>     |
| PDCD11   | Programmed Cell Death 11                                | Protein coding | 33 | GC10P103396 | 1.068448901 | <a href="https://www.genecards.org/cgi-bin/carddisp.pl?gene=PDCD11">https://www.genecards.org/cgi-bin/carddisp.pl?gene=PDCD11</a>     |
| SPATA18  | Spermatogenesis Associated 18                           | Protein coding | 33 | GC04P052051 | 1.068448901 | <a href="https://www.genecards.org/cgi-bin/carddisp.pl?gene=SPATA18">https://www.genecards.org/cgi-bin/carddisp.pl?gene=SPATA18</a>   |
| NYNRIN   | NYN Domain And Retroviral Integrase Containing          | Protein coding | 33 | GC14P026885 | 1.068448901 | <a href="https://www.genecards.org/cgi-bin/carddisp.pl?gene=NYNRIN">https://www.genecards.org/cgi-bin/carddisp.pl?gene=NYNRIN</a>     |
| TMEM51   | Transmembrane Protein 51                                | Protein coding | 33 | GC01P015225 | 1.068448901 | <a href="https://www.genecards.org/cgi-bin/carddisp.pl?gene=TMEM51">https://www.genecards.org/cgi-bin/carddisp.pl?gene=TMEM51</a>     |
| TMEM74   | Transmembrane Protein 74                                | Protein coding | 33 | GC08M108606 | 1.068448901 | <a href="https://www.genecards.org/cgi-bin/carddisp.pl?gene=TMEM74">https://www.genecards.org/cgi-bin/carddisp.pl?gene=TMEM74</a>     |
| PRDM15   | PR/SET Domain 15                                        | Protein coding | 33 | GC21M041798 | 1.068448901 | <a href="https://www.genecards.org/cgi-bin/carddisp.pl?gene=PRDM15">https://www.genecards.org/cgi-bin/carddisp.pl?gene=PRDM15</a>     |
| RNF17    | Ring Finger Protein 17                                  | Protein coding | 33 | GC13P024747 | 1.068448901 | <a href="https://www.genecards.org/cgi-bin/carddisp.pl?gene=RNF17">https://www.genecards.org/cgi-bin/carddisp.pl?gene=RNF17</a>       |
| THNSL1   | Threonine Synthase Like 1                               | Protein coding | 33 | GC10P024954 | 1.068448901 | <a href="https://www.genecards.org/cgi-bin/carddisp.pl?gene=THNSL1">https://www.genecards.org/cgi-bin/carddisp.pl?gene=THNSL1</a>     |
| ZNF431   | Zinc Finger Protein 431                                 | Protein coding | 33 | GC19P021142 | 1.068448901 | <a href="https://www.genecards.org/cgi-bin/carddisp.pl?gene=ZNF431">https://www.genecards.org/cgi-bin/carddisp.pl?gene=ZNF431</a>     |
| ZFAND2A  | Zinc Finger AN1-Type Containing 2A                      | Protein coding | 33 | GC07M001335 | 1.068448901 | <a href="https://www.genecards.org/cgi-bin/carddisp.pl?gene=ZFAND2A">https://www.genecards.org/cgi-bin/carddisp.pl?gene=ZFAND2A</a>   |
| ADGRF1   | Adhesion G Protein-Coupled Receptor F1                  | Protein coding | 32 | GC06M046997 | 1.068448901 | <a href="https://www.genecards.org/cgi-bin/carddisp.pl?gene=ADGRF1">https://www.genecards.org/cgi-bin/carddisp.pl?gene=ADGRF1</a>     |
| CST9     | Cystatin 9                                              | Protein coding | 32 | GC20M023606 | 1.068448901 | <a href="https://www.genecards.org/cgi-bin/carddisp.pl?gene=CST9">https://www.genecards.org/cgi-bin/carddisp.pl?gene=CST9</a>         |
| INO80E   | INO80 Complex Subunit E                                 | Protein coding | 32 | GC16P033399 | 1.068448901 | <a href="https://www.genecards.org/cgi-bin/carddisp.pl?gene=INO80E">https://www.genecards.org/cgi-bin/carddisp.pl?gene=INO80E</a>     |

|              |                                                                                |                |    |             |             |                                                                                                                                               |
|--------------|--------------------------------------------------------------------------------|----------------|----|-------------|-------------|-----------------------------------------------------------------------------------------------------------------------------------------------|
| R3HCC1L      | R3H Domain And Coiled-Coil Containing 1 Like                                   | Protein coding | 32 | GC10P098135 | 1.068448901 | <a href="https://www.genecards.org/cgi-bin/carddisp.pl?gene=R3HCC1L">https://www.genecards.org/cgi-bin/carddisp.pl?gene=R3HCC1L</a>           |
| QRICH2       | Glutamine Rich 2                                                               | Protein coding | 32 | GC17M076290 | 1.068448901 | <a href="https://www.genecards.org/cgi-bin/carddisp.pl?gene=QRICH2">https://www.genecards.org/cgi-bin/carddisp.pl?gene=QRICH2</a>             |
| RAB19        | RAB19, Member RAS Oncogene Family                                              | Protein coding | 32 | GC07P140403 | 1.068448901 | <a href="https://www.genecards.org/cgi-bin/carddisp.pl?gene=RAB19">https://www.genecards.org/cgi-bin/carddisp.pl?gene=RAB19</a>               |
| ASPHD1       | Aspartate $\beta$ -Hydroxylase Domain Containing 1                             | Protein coding | 31 | GC16P033394 | 1.068448901 | <a href="https://www.genecards.org/cgi-bin/carddisp.pl?gene=ASPHD1">https://www.genecards.org/cgi-bin/carddisp.pl?gene=ASPHD1</a>             |
| C7orf50      | Chromosome 7 Open Reading Frame 50                                             | Protein coding | 31 | GC07M000993 | 1.068448901 | <a href="https://www.genecards.org/cgi-bin/carddisp.pl?gene=C7orf50">https://www.genecards.org/cgi-bin/carddisp.pl?gene=C7orf50</a>           |
| CCDC153      | Coiled-Coil Domain Containing 153                                              | Protein coding | 31 | GC11M119189 | 1.068448901 | <a href="https://www.genecards.org/cgi-bin/carddisp.pl?gene=CCDC153">https://www.genecards.org/cgi-bin/carddisp.pl?gene=CCDC153</a>           |
| CCDC83       | Coiled-Coil Domain Containing 83                                               | Protein coding | 31 | GC11P085855 | 1.068448901 | <a href="https://www.genecards.org/cgi-bin/carddisp.pl?gene=CCDC83">https://www.genecards.org/cgi-bin/carddisp.pl?gene=CCDC83</a>             |
| DPPA3        | Developmental Pluripotency Associated 3                                        | Protein coding | 31 | GC12P013214 | 1.068448901 | <a href="https://www.genecards.org/cgi-bin/carddisp.pl?gene=DPPA3">https://www.genecards.org/cgi-bin/carddisp.pl?gene=DPPA3</a>               |
| GPN2         | GPN-Loop GTPase 2                                                              | Protein coding | 31 | GC01M026876 | 1.068448901 | <a href="https://www.genecards.org/cgi-bin/carddisp.pl?gene=GPN2">https://www.genecards.org/cgi-bin/carddisp.pl?gene=GPN2</a>                 |
| KAZN         | Kazrin, Periplakin Interacting Protein                                         | Protein coding | 31 | GC01P013893 | 1.068448901 | <a href="https://www.genecards.org/cgi-bin/carddisp.pl?gene=KAZN">https://www.genecards.org/cgi-bin/carddisp.pl?gene=KAZN</a>                 |
| MORN1        | MORN Repeat Containing 1                                                       | Protein coding | 31 | GC01M003129 | 1.068448901 | <a href="https://www.genecards.org/cgi-bin/carddisp.pl?gene=MORN1">https://www.genecards.org/cgi-bin/carddisp.pl?gene=MORN1</a>               |
| LYZL6        | Lysozyme Like 6                                                                | Protein coding | 31 | GC17M035934 | 1.068448901 | <a href="https://www.genecards.org/cgi-bin/carddisp.pl?gene=LYZL6">https://www.genecards.org/cgi-bin/carddisp.pl?gene=LYZL6</a>               |
| TMEM243      | Transmembrane Protein 243                                                      | Protein coding | 31 | GC07M087196 | 1.068448901 | <a href="https://www.genecards.org/cgi-bin/carddisp.pl?gene=TMEM243">https://www.genecards.org/cgi-bin/carddisp.pl?gene=TMEM243</a>           |
| TRNP1        | TMF1 Regulated Nuclear Protein 1                                               | Protein coding | 31 | GC01P026993 | 1.068448901 | <a href="https://www.genecards.org/cgi-bin/carddisp.pl?gene=TRNP1">https://www.genecards.org/cgi-bin/carddisp.pl?gene=TRNP1</a>               |
| DYNC2I1      | Dynein 2 Intermediate Chain 1                                                  | Protein coding | 30 | GC07P158839 | 1.068448901 | <a href="https://www.genecards.org/cgi-bin/carddisp.pl?gene=DYNC2I1">https://www.genecards.org/cgi-bin/carddisp.pl?gene=DYNC2I1</a>           |
| CSTL1        | Cystatin Like 1                                                                | Protein coding | 30 | GC20P023439 | 1.068448901 | <a href="https://www.genecards.org/cgi-bin/carddisp.pl?gene=CSTL1">https://www.genecards.org/cgi-bin/carddisp.pl?gene=CSTL1</a>               |
| ENDOV        | Endonuclease V                                                                 | Protein coding | 30 | GC17P080415 | 1.068448901 | <a href="https://www.genecards.org/cgi-bin/carddisp.pl?gene=ENDOV">https://www.genecards.org/cgi-bin/carddisp.pl?gene=ENDOV</a>               |
| RERGL        | RERG Like                                                                      | Protein coding | 30 | GC12M018080 | 1.068448901 | <a href="https://www.genecards.org/cgi-bin/carddisp.pl?gene=RERGL">https://www.genecards.org/cgi-bin/carddisp.pl?gene=RERGL</a>               |
| VWDE         | Von Willebrand Factor D And EGF Domains                                        | Protein coding | 30 | GC07M012338 | 1.068448901 | <a href="https://www.genecards.org/cgi-bin/carddisp.pl?gene=VWDE">https://www.genecards.org/cgi-bin/carddisp.pl?gene=VWDE</a>                 |
| ZNF626       | Zinc Finger Protein 626                                                        | Protein coding | 30 | GC19M020619 | 1.068448901 | <a href="https://www.genecards.org/cgi-bin/carddisp.pl?gene=ZNF626">https://www.genecards.org/cgi-bin/carddisp.pl?gene=ZNF626</a>             |
| DEFA1B       | Defensin $\alpha$ 1B                                                           | Protein coding | 29 | GC08M006996 | 1.068448901 | <a href="https://www.genecards.org/cgi-bin/carddisp.pl?gene=DEFA1B">https://www.genecards.org/cgi-bin/carddisp.pl?gene=DEFA1B</a>             |
| ARMC12       | Armadillo Repeat Containing 12                                                 | Protein coding | 29 | GC06P058447 | 1.068448901 | <a href="https://www.genecards.org/cgi-bin/carddisp.pl?gene=ARMC12">https://www.genecards.org/cgi-bin/carddisp.pl?gene=ARMC12</a>             |
| FAAP100      | FA Core Complex Associated Protein 100                                         | Protein coding | 29 | GC17M081540 | 1.068448901 | <a href="https://www.genecards.org/cgi-bin/carddisp.pl?gene=FAAP100">https://www.genecards.org/cgi-bin/carddisp.pl?gene=FAAP100</a>           |
| LRRC37A2     | Leucine Rich Repeat Containing 37 Member A2                                    | Protein coding | 29 | GC17P046511 | 1.068448901 | <a href="https://www.genecards.org/cgi-bin/carddisp.pl?gene=LRRC37A2">https://www.genecards.org/cgi-bin/carddisp.pl?gene=LRRC37A2</a>         |
| XKR9         | XK Related 9                                                                   | Protein coding | 29 | GC08P070669 | 1.068448901 | <a href="https://www.genecards.org/cgi-bin/carddisp.pl?gene=XKR9">https://www.genecards.org/cgi-bin/carddisp.pl?gene=XKR9</a>                 |
| MARCHF1      | Membrane Associated Ring-CH-Type Finger 1                                      | Protein coding | 28 | GC04M163525 | 1.068448901 | <a href="https://www.genecards.org/cgi-bin/carddisp.pl?gene=MARCHF1">https://www.genecards.org/cgi-bin/carddisp.pl?gene=MARCHF1</a>           |
| SYCE1L       | Synaptonemal Complex Central Element Protein 1 Like                            | Protein coding | 28 | GC16P077200 | 1.068448901 | <a href="https://www.genecards.org/cgi-bin/carddisp.pl?gene=SYCE1L">https://www.genecards.org/cgi-bin/carddisp.pl?gene=SYCE1L</a>             |
| RAB44        | RAB44, Member RAS Oncogene Family                                              | Protein coding | 28 | GC06P058461 | 1.068448901 | <a href="https://www.genecards.org/cgi-bin/carddisp.pl?gene=RAB44">https://www.genecards.org/cgi-bin/carddisp.pl?gene=RAB44</a>               |
| SPINK9       | Serine Peptidase Inhibitor Kazal Type 9                                        | Protein coding | 28 | GC05P148321 | 1.068448901 | <a href="https://www.genecards.org/cgi-bin/carddisp.pl?gene=SPINK9">https://www.genecards.org/cgi-bin/carddisp.pl?gene=SPINK9</a>             |
| ANP32C       | Acidic Nuclear Phosphoprotein 32 Family Member C                               | Pseudogene     | 27 | GC04M164197 | 1.068448901 | <a href="https://www.genecards.org/cgi-bin/carddisp.pl?gene=ANP32C">https://www.genecards.org/cgi-bin/carddisp.pl?gene=ANP32C</a>             |
| CLDN25       | Claudin 25                                                                     | Protein coding | 27 | GC11P113779 | 1.068448901 | <a href="https://www.genecards.org/cgi-bin/carddisp.pl?gene=CLDN25">https://www.genecards.org/cgi-bin/carddisp.pl?gene=CLDN25</a>             |
| RPRML        | Reprimo Like                                                                   | Protein coding | 27 | GC17M046978 | 1.068448901 | <a href="https://www.genecards.org/cgi-bin/carddisp.pl?gene=RPRML">https://www.genecards.org/cgi-bin/carddisp.pl?gene=RPRML</a>               |
| CEP20        | Centrosomal Protein 20                                                         | Protein coding | 26 | GC16M015866 | 1.068448901 | <a href="https://www.genecards.org/cgi-bin/carddisp.pl?gene=CEP20">https://www.genecards.org/cgi-bin/carddisp.pl?gene=CEP20</a>               |
| ELAPOR2      | Endosome-Lysosome Associated Apoptosis And Autophagy Regulator Family Member 2 | Protein coding | 26 | GC07M086877 | 1.068448901 | <a href="https://www.genecards.org/cgi-bin/carddisp.pl?gene=ELAPOR2">https://www.genecards.org/cgi-bin/carddisp.pl?gene=ELAPOR2</a>           |
| FAAP20       | FA Core Complex Associated Protein 20                                          | Protein coding | 26 | GC01M003125 | 1.068448901 | <a href="https://www.genecards.org/cgi-bin/carddisp.pl?gene=FAAP20">https://www.genecards.org/cgi-bin/carddisp.pl?gene=FAAP20</a>             |
| ZNF737       | Zinc Finger Protein 737                                                        | Protein coding | 26 | GC19M027249 | 1.068448901 | <a href="https://www.genecards.org/cgi-bin/carddisp.pl?gene=ZNF737">https://www.genecards.org/cgi-bin/carddisp.pl?gene=ZNF737</a>             |
| C8orf86      | Chromosome 8 Open Reading Frame 86                                             | RNA gene       | 25 | GC08M038510 | 1.068448901 | <a href="https://www.genecards.org/cgi-bin/carddisp.pl?gene=C8orf86">https://www.genecards.org/cgi-bin/carddisp.pl?gene=C8orf86</a>           |
| TRIQK        | Triple QxxK/R Motif Containing                                                 | Protein coding | 25 | GC08M092883 | 1.068448901 | <a href="https://www.genecards.org/cgi-bin/carddisp.pl?gene=TRIQK">https://www.genecards.org/cgi-bin/carddisp.pl?gene=TRIQK</a>               |
| CENATAC      | Centrosomal AT-AC Splicing Factor                                              | Protein coding | 24 | GC11P119123 | 1.068448901 | <a href="https://www.genecards.org/cgi-bin/carddisp.pl?gene=CENATAC">https://www.genecards.org/cgi-bin/carddisp.pl?gene=CENATAC</a>           |
| METTL25B     | Methyltransferase Like 25B                                                     | Protein coding | 24 | GC01P156731 | 1.068448901 | <a href="https://www.genecards.org/cgi-bin/carddisp.pl?gene=METTL25B">https://www.genecards.org/cgi-bin/carddisp.pl?gene=METTL25B</a>         |
| LEXM         | Lymphocyte Expansion Molecule                                                  | Protein coding | 23 | GC01P054807 | 1.068448901 | <a href="https://www.genecards.org/cgi-bin/carddisp.pl?gene=LEXM">https://www.genecards.org/cgi-bin/carddisp.pl?gene=LEXM</a>                 |
| TEPSIN       | TEPSIN Adaptor Related Protein Complex 4 Accessory Protein                     | Protein coding | 23 | GC17M081229 | 1.068448901 | <a href="https://www.genecards.org/cgi-bin/carddisp.pl?gene=TEPSIN">https://www.genecards.org/cgi-bin/carddisp.pl?gene=TEPSIN</a>             |
| TP53TG1      | TP53 Target 1                                                                  | RNA gene       | 23 | GC07M087325 | 1.068448901 | <a href="https://www.genecards.org/cgi-bin/carddisp.pl?gene=TP53TG1">https://www.genecards.org/cgi-bin/carddisp.pl?gene=TP53TG1</a>           |
| NPIPA5       | Nuclear Pore Complex Interacting Protein Family Member A5                      | Protein coding | 22 | GC16M015363 | 1.068448901 | <a href="https://www.genecards.org/cgi-bin/carddisp.pl?gene=NPIPA5">https://www.genecards.org/cgi-bin/carddisp.pl?gene=NPIPA5</a>             |
| CMAHP        | Cytidine Monophospho-N-Acetylneuraminic Acid Hydroxylase, Pseudogene           | Pseudogene     | 21 | GC06M025082 | 1.068448901 | <a href="https://www.genecards.org/cgi-bin/carddisp.pl?gene=CMAHP">https://www.genecards.org/cgi-bin/carddisp.pl?gene=CMAHP</a>               |
| CYP1B1-AS1   | CYP1B1 Antisense RNA 1                                                         | RNA gene       | 19 | GC02P038075 | 1.068448901 | <a href="https://www.genecards.org/cgi-bin/carddisp.pl?gene=CYP1B1-AS1">https://www.genecards.org/cgi-bin/carddisp.pl?gene=CYP1B1-AS1</a>     |
| TBC1D29P     | TBC1 Domain Family Member 29, Pseudogene                                       | Protein coding | 19 | GC17P031079 | 1.068448901 | <a href="https://www.genecards.org/cgi-bin/carddisp.pl?gene=TBC1D29P">https://www.genecards.org/cgi-bin/carddisp.pl?gene=TBC1D29P</a>         |
| TMEM132E-DT  | TMEM132E Divergent Transcript                                                  | RNA gene       | 19 | GC17M034575 | 1.068448901 | <a href="https://www.genecards.org/cgi-bin/carddisp.pl?gene=TMEM132E-DT">https://www.genecards.org/cgi-bin/carddisp.pl?gene=TMEM132E-DT</a>   |
| MIR873       | MicroRNA 873                                                                   | RNA gene       | 18 | GC09M028880 | 1.068448901 | <a href="https://www.genecards.org/cgi-bin/carddisp.pl?gene=MIR873">https://www.genecards.org/cgi-bin/carddisp.pl?gene=MIR873</a>             |
| MAPKAPK5-AS1 | MAPKAPK5 Antisense RNA 1                                                       | RNA gene       | 18 | GC12M111839 | 1.068448901 | <a href="https://www.genecards.org/cgi-bin/carddisp.pl?gene=MAPKAPK5-AS1">https://www.genecards.org/cgi-bin/carddisp.pl?gene=MAPKAPK5-AS1</a> |
| HAGLR        | HOXD Antisense Growth-Associated Long Non-Coding RNA                           | RNA gene       | 16 | GC02M176173 | 1.068448901 | <a href="https://www.genecards.org/cgi-bin/carddisp.pl?gene=HAGLR">https://www.genecards.org/cgi-bin/carddisp.pl?gene=HAGLR</a>               |
| SNORA81      | Small Nucleolar RNA, H/ACA Box 81                                              | RNA gene       | 16 | GC03P186965 | 1.068448901 | <a href="https://www.genecards.org/cgi-bin/carddisp.pl?gene=SNORA81">https://www.genecards.org/cgi-bin/carddisp.pl?gene=SNORA81</a>           |
| SNORA4       | Small Nucleolar RNA, H/ACA Box 4                                               | RNA gene       | 16 | GC03P186959 | 1.068448901 | <a href="https://www.genecards.org/cgi-bin/carddisp.pl?gene=SNORA4">https://www.genecards.org/cgi-bin/carddisp.pl?gene=SNORA4</a>             |
| COX7A2P2     | Cytochrome C Oxidase Subunit 7A2 Pseudogene 2                                  | Pseudogene     | 15 | GC04P096902 | 1.068448901 | <a href="https://www.genecards.org/cgi-bin/carddisp.pl?gene=COX7A2P2">https://www.genecards.org/cgi-bin/carddisp.pl?gene=COX7A2P2</a>         |
| DISC1FP1     | DISC1 Fusion Partner 1                                                         | RNA gene       | 15 | GC11P090251 | 1.068448901 | <a href="https://www.genecards.org/cgi-bin/carddisp.pl?gene=DISC1FP1">https://www.genecards.org/cgi-bin/carddisp.pl?gene=DISC1FP1</a>         |
| LINC00923    | Long Intergenic Non-Protein Coding RNA 923                                     | RNA gene       | 15 | GC15M108692 | 1.068448901 | <a href="https://www.genecards.org/cgi-bin/carddisp.pl?gene=LINC00923">https://www.genecards.org/cgi-bin/carddisp.pl?gene=LINC00923</a>       |
| LINC01013    | Long Intergenic Non-Protein Coding RNA 1013                                    | RNA gene       | 15 | GC06P132131 | 1.068448901 | <a href="https://www.genecards.org/cgi-bin/carddisp.pl?gene=LINC01013">https://www.genecards.org/cgi-bin/carddisp.pl?gene=LINC01013</a>       |
| MIR1248      | MicroRNA 1248                                                                  | RNA gene       | 15 | GC03P186960 | 1.068448901 | <a href="https://www.genecards.org/cgi-bin/carddisp.pl?gene=MIR1248">https://www.genecards.org/cgi-bin/carddisp.pl?gene=MIR1248</a>           |
| PKD1P1       | Polycystin 1, Transient Receptor Potential Channel Interacting Pseudogene 1    | Pseudogene     | 15 | GC16P016310 | 1.068448901 | <a href="https://www.genecards.org/cgi-bin/carddisp.pl?gene=PKD1P1">https://www.genecards.org/cgi-bin/carddisp.pl?gene=PKD1P1</a>             |
| OR4E1        | Olfactory Receptor Family 4 Subfamily E Member 1                               | Protein coding | 15 | GC14M021671 | 1.068448901 | <a href="https://www.genecards.org/cgi-bin/carddisp.pl?gene=OR4E1">https://www.genecards.org/cgi-bin/carddisp.pl?gene=OR4E1</a>               |
| SNORA63      | Small Nucleolar RNA, H/ACA Box 63                                              | RNA gene       | 15 | GC03P186962 | 1.068448901 | <a href="https://www.genecards.org/cgi-bin/carddisp.pl?gene=SNORA63">https://www.genecards.org/cgi-bin/carddisp.pl?gene=SNORA63</a>           |
| TMEM9B-AS1   | TMEM9B Antisense RNA 1                                                         | RNA gene       | 15 | GC11P008964 | 1.068448901 | <a href="https://www.genecards.org/cgi-bin/carddisp.pl?gene=TMEM9B-AS1">https://www.genecards.org/cgi-bin/carddisp.pl?gene=TMEM9B-AS1</a>     |
| C10orf143    | Chromosome 10 Open Reading Frame 143                                           | Protein coding | 14 | GC10M130020 | 1.068448901 | <a href="https://www.genecards.org/cgi-bin/carddisp.pl?gene=C10orf143">https://www.genecards.org/cgi-bin/carddisp.pl?gene=C10orf143</a>       |
| LINC02906    | Long Intergenic Non-Protein Coding RNA 2906                                    | RNA gene       | 14 | GC08M093135 | 1.068448901 | <a href="https://www.genecards.org/cgi-bin/carddisp.pl?gene=LINC02906">https://www.genecards.org/cgi-bin/carddisp.pl?gene=LINC02906</a>       |
| LINC00924    | Long Intergenic Non-Protein Coding RNA 924                                     | RNA gene       | 13 | GC15P100796 | 1.068448901 | <a href="https://www.genecards.org/cgi-bin/carddisp.pl?gene=LINC00924">https://www.genecards.org/cgi-bin/carddisp.pl?gene=LINC00924</a>       |
| EEF1A1P5     | Eukaryotic Translation Elongation Factor 1 $\alpha$ 1 Pseudogene 5             | Pseudogene     | 13 | GC09P133019 | 1.068448901 | <a href="https://www.genecards.org/cgi-bin/carddisp.pl?gene=EEF1A1P5">https://www.genecards.org/cgi-bin/carddisp.pl?gene=EEF1A1P5</a>         |
| MIR4492      | MicroRNA 4492                                                                  | RNA gene       | 13 | GC11P118910 | 1.068448901 | <a href="https://www.genecards.org/cgi-bin/carddisp.pl?gene=MIR4492">https://www.genecards.org/cgi-bin/carddisp.pl?gene=MIR4492</a>           |
| NALCN-AS1    | NALCN Antisense RNA 1                                                          | RNA gene       | 13 | GC13P100708 | 1.068448901 | <a href="https://www.genecards.org/cgi-bin/carddisp.pl?gene=NALCN-AS1">https://www.genecards.org/cgi-bin/carddisp.pl?gene=NALCN-AS1</a>       |
| LINC00640    | Long Intergenic Non-Protein Coding RNA 640                                     | RNA gene       | 13 | GC14P051333 | 1.068448901 | <a href="https://www.genecards.org/cgi-bin/carddisp.pl?gene=LINC00640">https://www.genecards.org/cgi-bin/carddisp.pl?gene=LINC00640</a>       |
| SNORD2       | Small Nucleolar RNA, C/D Box 2                                                 | RNA gene       | 13 | GC03P186784 | 1.068448901 | <a href="https://www.genecards.org/cgi-bin/carddisp.pl?gene=SNORD2">https://www.genecards.org/cgi-bin/carddisp.pl?gene=SNORD2</a>             |
| LOC100131635 | HCG1645011-Like                                                                | RNA gene       | 13 | GC03P187702 | 1.068448901 | <a href="https://www.genecards.org/cgi-bin/carddisp.pl?gene=LOC100131635">https://www.genecards.org/cgi-bin/carddisp.pl?gene=LOC100131635</a> |
| B4GALT4-AS1  | B4GALT4 Antisense RNA 1                                                        | RNA gene       | 12 | GC03P119226 | 1.068448901 | <a href="https://www.genecards.org/cgi-bin/carddisp.pl?gene=B4GALT4-AS1">https://www.genecards.org/cgi-bin/carddisp.pl?gene=B4GALT4-AS1</a>   |
| CST9LP1      | Cystatin 9-Like Pseudogene 1                                                   | Pseudogene     | 12 | GC20M023530 | 1.068448901 | <a href="https://www.genecards.org/cgi-bin/carddisp.pl?gene=CST9LP1">https://www.genecards.org/cgi-bin/carddisp.pl?gene=CST9LP1</a>           |
| MIR4427      | MicroRNA 4427                                                                  | RNA gene       | 12 | GC01P233625 | 1.068448901 | <a href="https://www.genecards.org/cgi-bin/carddisp.pl?gene=MIR4427">https://www.genecards.org/cgi-bin/carddisp.pl?gene=MIR4427</a>           |
| LINC01750    | Long Intergenic Non-Protein Coding RNA 1750                                    | RNA gene       | 12 | GC01P111992 | 1.068448901 | <a href="https://www.genecards.org/cgi-bin/carddisp.pl?gene=LINC01750">https://www.genecards.org/cgi-bin/carddisp.pl?gene=LINC01750</a>       |
| MCPH1-AS1    | MCPH1 Antisense RNA 1                                                          | RNA gene       | 12 | GC08M006619 | 1.068448901 | <a href="https://www.genecards.org/cgi-bin/carddisp.pl?gene=MCPH1-AS1">https://www.genecards.org/cgi-bin/carddisp.pl?gene=MCPH1-AS1</a>       |

|                 |                                                                                              |                |    |             |             |                                                                                                                                                     |
|-----------------|----------------------------------------------------------------------------------------------|----------------|----|-------------|-------------|-----------------------------------------------------------------------------------------------------------------------------------------------------|
| SDR16C6P        | Short Chain Dehydrogenase/Reductase Family 16C Member 6, Pseudogene                          | Pseudogene     | 12 | GC08M056373 | 1.068448901 | <a href="https://www.genecards.org/cgi-bin/carddisp.pl?gene=SDR16C6P">https://www.genecards.org/cgi-bin/carddisp.pl?gene=SDR16C6P</a>               |
| SUZ12P1         | SUZ12 Pseudogene 1                                                                           | Pseudogene     | 12 | GC17P030709 | 1.068448901 | <a href="https://www.genecards.org/cgi-bin/carddisp.pl?gene=SUZ12P1">https://www.genecards.org/cgi-bin/carddisp.pl?gene=SUZ12P1</a>                 |
| FAM95C          | Family With Sequence Similarity 95 Member C                                                  | RNA gene       | 11 | GC09M039164 | 1.068448901 | <a href="https://www.genecards.org/cgi-bin/carddisp.pl?gene=FAM95C">https://www.genecards.org/cgi-bin/carddisp.pl?gene=FAM95C</a>                   |
| LOC100129534    | Small Nuclear Ribonucleoprotein Polypeptide N Pseudogene                                     | Pseudogene     | 11 | GC01M003130 | 1.068448901 | <a href="https://www.genecards.org/cgi-bin/carddisp.pl?gene=LOC100129534">https://www.genecards.org/cgi-bin/carddisp.pl?gene=LOC100129534</a>       |
| MOCS2-DT        | MOCS2 Divergent Transcript                                                                   | RNA gene       | 11 | GC05P053111 | 1.068448901 | <a href="https://www.genecards.org/cgi-bin/carddisp.pl?gene=MOCS2-DT">https://www.genecards.org/cgi-bin/carddisp.pl?gene=MOCS2-DT</a>               |
| MIR4277         | MicroRNA 4277                                                                                | RNA gene       | 11 | GC05M001708 | 1.068448901 | <a href="https://www.genecards.org/cgi-bin/carddisp.pl?gene=MIR4277">https://www.genecards.org/cgi-bin/carddisp.pl?gene=MIR4277</a>                 |
| PRKCZ-AS1       | PRKCZ Antisense RNA 1                                                                        | RNA gene       | 11 | GC01M003124 | 1.068448901 | <a href="https://www.genecards.org/cgi-bin/carddisp.pl?gene=PRKCZ-AS1">https://www.genecards.org/cgi-bin/carddisp.pl?gene=PRKCZ-AS1</a>             |
| OR7E154P        | Olfactory Receptor Family 7 Subfamily E Member 154 Pseudogene                                | Pseudogene     | 11 | GC08M007705 | 1.068448901 | <a href="https://www.genecards.org/cgi-bin/carddisp.pl?gene=OR7E154P">https://www.genecards.org/cgi-bin/carddisp.pl?gene=OR7E154P</a>               |
| SNORA63B        | Small Nucleolar RNA, H/ACA Box 63B                                                           | RNA gene       | 11 | GC03P186961 | 1.068448901 | <a href="https://www.genecards.org/cgi-bin/carddisp.pl?gene=SNORA63B">https://www.genecards.org/cgi-bin/carddisp.pl?gene=SNORA63B</a>               |
| DEPDC1-AS1      | DEPDC1 Antisense RNA 1                                                                       | RNA gene       | 10 | GC01P068496 | 1.068448901 | <a href="https://www.genecards.org/cgi-bin/carddisp.pl?gene=DEPDC1-AS1">https://www.genecards.org/cgi-bin/carddisp.pl?gene=DEPDC1-AS1</a>           |
| CENATAC-DT      | CENATAC Divergent Transcript                                                                 | RNA gene       | 10 | GC11M118996 | 1.068448901 | <a href="https://www.genecards.org/cgi-bin/carddisp.pl?gene=CENATAC-DT">https://www.genecards.org/cgi-bin/carddisp.pl?gene=CENATAC-DT</a>           |
| LINC02709       | Long Intergenic Non-Protein Coding RNA 2709                                                  | RNA gene       | 10 | GC11M009754 | 1.068448901 | <a href="https://www.genecards.org/cgi-bin/carddisp.pl?gene=LINC02709">https://www.genecards.org/cgi-bin/carddisp.pl?gene=LINC02709</a>             |
| MIR1470         | MicroRNA 1470                                                                                | RNA gene       | 10 | GC19P015550 | 1.068448901 | <a href="https://www.genecards.org/cgi-bin/carddisp.pl?gene=MIR1470">https://www.genecards.org/cgi-bin/carddisp.pl?gene=MIR1470</a>                 |
| RPL17P9         | Ribosomal Protein L17 Pseudogene 9                                                           | Pseudogene     | 10 | GC01M026454 | 1.068448901 | <a href="https://www.genecards.org/cgi-bin/carddisp.pl?gene=RPL17P9">https://www.genecards.org/cgi-bin/carddisp.pl?gene=RPL17P9</a>                 |
| ZFAND2A-DT      | ZFAND2A Divergent Transcript                                                                 | RNA gene       | 10 | GC07P001433 | 1.068448901 | <a href="https://www.genecards.org/cgi-bin/carddisp.pl?gene=ZFAND2A-DT">https://www.genecards.org/cgi-bin/carddisp.pl?gene=ZFAND2A-DT</a>           |
| DEFT1P2         | Defensin $\theta$ 1, Pseudogene 2                                                            | Pseudogene     | 9  | GC08M007006 | 1.068448901 | <a href="https://www.genecards.org/cgi-bin/carddisp.pl?gene=DEFT1P2">https://www.genecards.org/cgi-bin/carddisp.pl?gene=DEFT1P2</a>                 |
| ACTG1P20        | Actin $\gamma$ 1 Pseudogene 20                                                               | Pseudogene     | 9  | GC01P027383 | 1.068448901 | <a href="https://www.genecards.org/cgi-bin/carddisp.pl?gene=ACTG1P20">https://www.genecards.org/cgi-bin/carddisp.pl?gene=ACTG1P20</a>               |
| CELF2-DT        | CELF2 Divergent Transcript                                                                   | RNA gene       | 9  | GC10M010369 | 1.068448901 | <a href="https://www.genecards.org/cgi-bin/carddisp.pl?gene=CELF2-DT">https://www.genecards.org/cgi-bin/carddisp.pl?gene=CELF2-DT</a>               |
| DEFA11P         | Defensin $\alpha$ 11, Pseudogene                                                             | Pseudogene     | 9  | GC08M007028 | 1.068448901 | <a href="https://www.genecards.org/cgi-bin/carddisp.pl?gene=DEFA11P">https://www.genecards.org/cgi-bin/carddisp.pl?gene=DEFA11P</a>                 |
| DINOL           | Damage Induced Long Noncoding RNA                                                            | RNA gene       | 9  | GC06M049471 | 1.068448901 | <a href="https://www.genecards.org/cgi-bin/carddisp.pl?gene=DINOL">https://www.genecards.org/cgi-bin/carddisp.pl?gene=DINOL</a>                     |
| FBXO38-DT       | FBXO38 Divergent Transcript                                                                  | RNA gene       | 9  | GC05M148084 | 1.068448901 | <a href="https://www.genecards.org/cgi-bin/carddisp.pl?gene=FBXO38-DT">https://www.genecards.org/cgi-bin/carddisp.pl?gene=FBXO38-DT</a>             |
| LINC02267       | Long Intergenic Non-Protein Coding RNA 2267                                                  | RNA gene       | 9  | GC04P096172 | 1.068448901 | <a href="https://www.genecards.org/cgi-bin/carddisp.pl?gene=LINC02267">https://www.genecards.org/cgi-bin/carddisp.pl?gene=LINC02267</a>             |
| LINC02426       | Long Intergenic Non-Protein Coding RNA 2426                                                  | RNA gene       | 9  | GC12P081955 | 1.068448901 | <a href="https://www.genecards.org/cgi-bin/carddisp.pl?gene=LINC02426">https://www.genecards.org/cgi-bin/carddisp.pl?gene=LINC02426</a>             |
| ZCCHC14-DT      | ZCCHC14 Divergent Transcript                                                                 | RNA gene       | 9  | GC16P087496 | 1.068448901 | <a href="https://www.genecards.org/cgi-bin/carddisp.pl?gene=ZCCHC14-DT">https://www.genecards.org/cgi-bin/carddisp.pl?gene=ZCCHC14-DT</a>           |
| LOC101928882    | Uncharacterized LOC101928882                                                                 | RNA gene       | 9  | GC03M180707 | 1.068448901 | <a href="https://www.genecards.org/cgi-bin/carddisp.pl?gene=LOC101928882">https://www.genecards.org/cgi-bin/carddisp.pl?gene=LOC101928882</a>       |
| LOC101928855    | Uncharacterized LOC101928855                                                                 | RNA gene       | 9  | GC17M080801 | 1.068448901 | <a href="https://www.genecards.org/cgi-bin/carddisp.pl?gene=LOC101928855">https://www.genecards.org/cgi-bin/carddisp.pl?gene=LOC101928855</a>       |
| ENSG00000262633 | Novel Protein                                                                                | Protein coding | 9  | GC17P046923 | 1.068448901 | <a href="https://www.genecards.org/cgi-bin/carddisp.pl?gene=ENSG00000262633">https://www.genecards.org/cgi-bin/carddisp.pl?gene=ENSG00000262633</a> |
| ATF4P4          | Activating Transcription Factor 4 Pseudogene 4                                               | Pseudogene     | 8  | GC11P113880 | 1.068448901 | <a href="https://www.genecards.org/cgi-bin/carddisp.pl?gene=ATF4P4">https://www.genecards.org/cgi-bin/carddisp.pl?gene=ATF4P4</a>                   |
| CRPP1           | C-Reactive Protein Pseudogene 1                                                              | Pseudogene     | 8  | GC01M159675 | 1.068448901 | <a href="https://www.genecards.org/cgi-bin/carddisp.pl?gene=CRPP1">https://www.genecards.org/cgi-bin/carddisp.pl?gene=CRPP1</a>                     |
| FOXF2-DT        | FOXF2 Divergent Transcript                                                                   | RNA gene       | 8  | GC06M001351 | 1.068448901 | <a href="https://www.genecards.org/cgi-bin/carddisp.pl?gene=FOXF2-DT">https://www.genecards.org/cgi-bin/carddisp.pl?gene=FOXF2-DT</a>               |
| LINC02400       | Long Intergenic Non-Protein Coding RNA 2400                                                  | RNA gene       | 8  | GC12P041765 | 1.068448901 | <a href="https://www.genecards.org/cgi-bin/carddisp.pl?gene=LINC02400">https://www.genecards.org/cgi-bin/carddisp.pl?gene=LINC02400</a>             |
| NPM1P39         | Nucleophosmin 1 Pseudogene 39                                                                | Pseudogene     | 8  | GC01P027206 | 1.068448901 | <a href="https://www.genecards.org/cgi-bin/carddisp.pl?gene=NPM1P39">https://www.genecards.org/cgi-bin/carddisp.pl?gene=NPM1P39</a>                 |
| LINC02511       | Long Intergenic Non-Protein Coding RNA 2511                                                  | RNA gene       | 8  | GC04M136805 | 1.068448901 | <a href="https://www.genecards.org/cgi-bin/carddisp.pl?gene=LINC02511">https://www.genecards.org/cgi-bin/carddisp.pl?gene=LINC02511</a>             |
| RPS7P3          | Ribosomal Protein S7 Pseudogene 3                                                            | Pseudogene     | 8  | GC01M233288 | 1.068448901 | <a href="https://www.genecards.org/cgi-bin/carddisp.pl?gene=RPS7P3">https://www.genecards.org/cgi-bin/carddisp.pl?gene=RPS7P3</a>                   |
| RPS20P14        | Ribosomal Protein S20 Pseudogene 14                                                          | Pseudogene     | 8  | GC03P186900 | 1.068448901 | <a href="https://www.genecards.org/cgi-bin/carddisp.pl?gene=RPS20P14">https://www.genecards.org/cgi-bin/carddisp.pl?gene=RPS20P14</a>               |
| RPL7AP10        | Ribosomal Protein L7a Pseudogene 10                                                          | Pseudogene     | 8  | GC19M021149 | 1.068448901 | <a href="https://www.genecards.org/cgi-bin/carddisp.pl?gene=RPL7AP10">https://www.genecards.org/cgi-bin/carddisp.pl?gene=RPL7AP10</a>               |
| ENSG00000261707 | Novel Transcript, Antisense To NUDT7                                                         | RNA gene       | 8  | GC16M077775 | 1.068448901 | <a href="https://www.genecards.org/cgi-bin/carddisp.pl?gene=ENSG00000261707">https://www.genecards.org/cgi-bin/carddisp.pl?gene=ENSG00000261707</a> |
| ENSG00000233754 | Novel Transcript                                                                             | RNA gene       | 8  | GC21M042781 | 1.068448901 | <a href="https://www.genecards.org/cgi-bin/carddisp.pl?gene=ENSG00000233754">https://www.genecards.org/cgi-bin/carddisp.pl?gene=ENSG00000233754</a> |
| ENSG00000222022 | Novel Transcript                                                                             | RNA gene       | 8  | GC02M237421 | 1.068448901 | <a href="https://www.genecards.org/cgi-bin/carddisp.pl?gene=ENSG00000222022">https://www.genecards.org/cgi-bin/carddisp.pl?gene=ENSG00000222022</a> |
| ENSG00000224079 | Novel Transcript                                                                             | RNA gene       | 8  | GC07P001425 | 1.068448901 | <a href="https://www.genecards.org/cgi-bin/carddisp.pl?gene=ENSG00000224079">https://www.genecards.org/cgi-bin/carddisp.pl?gene=ENSG00000224079</a> |
| ENSG00000226698 | Novel Transcript                                                                             | RNA gene       | 8  | GC01P026942 | 1.068448901 | <a href="https://www.genecards.org/cgi-bin/carddisp.pl?gene=ENSG00000226698">https://www.genecards.org/cgi-bin/carddisp.pl?gene=ENSG00000226698</a> |
| ENSG00000254554 | Novel Transcript                                                                             | RNA gene       | 8  | GC11M010296 | 1.068448901 | <a href="https://www.genecards.org/cgi-bin/carddisp.pl?gene=ENSG00000254554">https://www.genecards.org/cgi-bin/carddisp.pl?gene=ENSG00000254554</a> |
| ENSG00000243107 | Novel Transcript                                                                             | RNA gene       | 8  | GC07M092200 | 1.068448901 | <a href="https://www.genecards.org/cgi-bin/carddisp.pl?gene=ENSG00000243107">https://www.genecards.org/cgi-bin/carddisp.pl?gene=ENSG00000243107</a> |
| ENSG00000258942 | Novel Transcript                                                                             | RNA gene       | 8  | GC14M051344 | 1.068448901 | <a href="https://www.genecards.org/cgi-bin/carddisp.pl?gene=ENSG00000258942">https://www.genecards.org/cgi-bin/carddisp.pl?gene=ENSG00000258942</a> |
| MIR8084         | MicroRNA 8084                                                                                | RNA gene       | 7  | GC08P093029 | 1.068448901 | <a href="https://www.genecards.org/cgi-bin/carddisp.pl?gene=MIR8084">https://www.genecards.org/cgi-bin/carddisp.pl?gene=MIR8084</a>                 |
| RPL21P97        | Ribosomal Protein L21 Pseudogene 97                                                          | Pseudogene     | 7  | GC11P009675 | 1.068448901 | <a href="https://www.genecards.org/cgi-bin/carddisp.pl?gene=RPL21P97">https://www.genecards.org/cgi-bin/carddisp.pl?gene=RPL21P97</a>               |
| RNU1-88P        | RNA, U1 Small Nuclear 88, Pseudogene                                                         | Pseudogene     | 7  | GC06M049267 | 1.068448901 | <a href="https://www.genecards.org/cgi-bin/carddisp.pl?gene=RNU1-88P">https://www.genecards.org/cgi-bin/carddisp.pl?gene=RNU1-88P</a>               |
| RNU6-380P       | RNA, U6 Small Nuclear 380, Pseudogene                                                        | Pseudogene     | 7  | GC15P080663 | 1.068448901 | <a href="https://www.genecards.org/cgi-bin/carddisp.pl?gene=RNU6-380P">https://www.genecards.org/cgi-bin/carddisp.pl?gene=RNU6-380P</a>             |
| RNU6-440P       | RNA, U6 Small Nuclear 440, Pseudogene                                                        | Pseudogene     | 7  | GC02P201930 | 1.068448901 | <a href="https://www.genecards.org/cgi-bin/carddisp.pl?gene=RNU6-440P">https://www.genecards.org/cgi-bin/carddisp.pl?gene=RNU6-440P</a>             |
| RN7SL688P       | RNA, 7SL, Cytoplasmic 688, Pseudogene                                                        | Pseudogene     | 7  | GC11P118931 | 1.068448901 | <a href="https://www.genecards.org/cgi-bin/carddisp.pl?gene=RN7SL688P">https://www.genecards.org/cgi-bin/carddisp.pl?gene=RN7SL688P</a>             |
| ENSG00000260461 | Novel Transcript, Overlapping To OBFC1                                                       | RNA gene       | 7  | GC10M103877 | 1.068448901 | <a href="https://www.genecards.org/cgi-bin/carddisp.pl?gene=ENSG00000260461">https://www.genecards.org/cgi-bin/carddisp.pl?gene=ENSG00000260461</a> |
| ENSG00000262049 | Novel Transcript, Antisense To HGS                                                           | RNA gene       | 7  | GC17M081701 | 1.068448901 | <a href="https://www.genecards.org/cgi-bin/carddisp.pl?gene=ENSG00000262049">https://www.genecards.org/cgi-bin/carddisp.pl?gene=ENSG00000262049</a> |
| ENSG00000263826 | Novel Transcript, Antisense To Eukaryotic Translation Initiation Factor 4A, Isoform 2 EIF4A2 | RNA gene       | 7  | GC03M186781 | 1.068448901 | <a href="https://www.genecards.org/cgi-bin/carddisp.pl?gene=ENSG00000263826">https://www.genecards.org/cgi-bin/carddisp.pl?gene=ENSG00000263826</a> |
| ENSG00000254397 | Novel Transcript                                                                             | RNA gene       | 7  | GC11M009431 | 1.068448901 | <a href="https://www.genecards.org/cgi-bin/carddisp.pl?gene=ENSG00000254397">https://www.genecards.org/cgi-bin/carddisp.pl?gene=ENSG00000254397</a> |
| ENSG00000183889 | Novel Member Of The Nuclear Pore Complex Interacting Protein NPIP Gene Family                | Protein coding | 7  | GC16P016694 | 1.068448901 | <a href="https://www.genecards.org/cgi-bin/carddisp.pl?gene=ENSG00000183889">https://www.genecards.org/cgi-bin/carddisp.pl?gene=ENSG00000183889</a> |
| ENSG00000238387 |                                                                                              | RNA gene       | 7  | GC11P009579 | 1.068448901 | <a href="https://www.genecards.org/cgi-bin/carddisp.pl?gene=ENSG00000238387">https://www.genecards.org/cgi-bin/carddisp.pl?gene=ENSG00000238387</a> |
| ENSG00000253821 | Novel Transcript                                                                             | RNA gene       | 7  | GC08P057468 | 1.068448901 | <a href="https://www.genecards.org/cgi-bin/carddisp.pl?gene=ENSG00000253821">https://www.genecards.org/cgi-bin/carddisp.pl?gene=ENSG00000253821</a> |
| ENSG00000227698 | Novel Transcript                                                                             | RNA gene       | 7  | GC21M041874 | 1.068448901 | <a href="https://www.genecards.org/cgi-bin/carddisp.pl?gene=ENSG00000227698">https://www.genecards.org/cgi-bin/carddisp.pl?gene=ENSG00000227698</a> |
| ENSG00000231724 | Novel Transcript                                                                             | RNA gene       | 7  | GC03P186807 | 1.068448901 | <a href="https://www.genecards.org/cgi-bin/carddisp.pl?gene=ENSG00000231724">https://www.genecards.org/cgi-bin/carddisp.pl?gene=ENSG00000231724</a> |
| EEF1A1P36       | Eukaryotic Translation Elongation Factor 1 $\alpha$ 1 Pseudogene 36                          | Pseudogene     | 6  | GC06P132271 | 1.068448901 | <a href="https://www.genecards.org/cgi-bin/carddisp.pl?gene=EEF1A1P36">https://www.genecards.org/cgi-bin/carddisp.pl?gene=EEF1A1P36</a>             |
| LINC01148       | Long Intergenic Non-Protein Coding RNA 1148                                                  | RNA gene       | 6  | GC14P086932 | 1.068448901 | <a href="https://www.genecards.org/cgi-bin/carddisp.pl?gene=LINC01148">https://www.genecards.org/cgi-bin/carddisp.pl?gene=LINC01148</a>             |
| LINC01643       | Long Intergenic Non-Protein Coding RNA 1643                                                  | RNA gene       | 6  | GC22P034019 | 1.068448901 | <a href="https://www.genecards.org/cgi-bin/carddisp.pl?gene=LINC01643">https://www.genecards.org/cgi-bin/carddisp.pl?gene=LINC01643</a>             |
| LCN1P2          | Lipocalin 1 Pseudogene 2                                                                     | Pseudogene     | 6  | GC09P133317 | 1.068448901 | <a href="https://www.genecards.org/cgi-bin/carddisp.pl?gene=LCN1P2">https://www.genecards.org/cgi-bin/carddisp.pl?gene=LCN1P2</a>                   |
| MTND1P24        | MT-ND1 Pseudogene 24                                                                         | Pseudogene     | 6  | GC12M041699 | 1.068448901 | <a href="https://www.genecards.org/cgi-bin/carddisp.pl?gene=MTND1P24">https://www.genecards.org/cgi-bin/carddisp.pl?gene=MTND1P24</a>               |
| NRBF2P1         | Nuclear Receptor Binding Factor 2 Pseudogene 1                                               | Pseudogene     | 6  | GC18P035841 | 1.068448901 | <a href="https://www.genecards.org/cgi-bin/carddisp.pl?gene=NRBF2P1">https://www.genecards.org/cgi-bin/carddisp.pl?gene=NRBF2P1</a>                 |
| LINC02151       | Long Intergenic Non-Protein Coding RNA 2151                                                  | RNA gene       | 6  | GC11M116497 | 1.068448901 | <a href="https://www.genecards.org/cgi-bin/carddisp.pl?gene=LINC02151">https://www.genecards.org/cgi-bin/carddisp.pl?gene=LINC02151</a>             |
| LINC02309       | Long Intergenic Non-Protein Coding RNA 2309                                                  | RNA gene       | 6  | GC14P086333 | 1.068448901 | <a href="https://www.genecards.org/cgi-bin/carddisp.pl?gene=LINC02309">https://www.genecards.org/cgi-bin/carddisp.pl?gene=LINC02309</a>             |
| LINC02686       | Long Intergenic Non-Protein Coding RNA 2686                                                  | RNA gene       | 6  | GC11M024236 | 1.068448901 | <a href="https://www.genecards.org/cgi-bin/carddisp.pl?gene=LINC02686">https://www.genecards.org/cgi-bin/carddisp.pl?gene=LINC02686</a>             |
| TPT1P9          | Tumor Protein, Translationally-Controlled 1 Pseudogene 9                                     | Pseudogene     | 6  | GC09M118082 | 1.068448901 | <a href="https://www.genecards.org/cgi-bin/carddisp.pl?gene=TPT1P9">https://www.genecards.org/cgi-bin/carddisp.pl?gene=TPT1P9</a>                   |
| VN2R10P         | Vomeronasal 2 Receptor 10, Pseudogene                                                        | Pseudogene     | 6  | GC16P077221 | 1.068448901 | <a href="https://www.genecards.org/cgi-bin/carddisp.pl?gene=VN2R10P">https://www.genecards.org/cgi-bin/carddisp.pl?gene=VN2R10P</a>                 |
| RNA5SP107       | RNA, 5S Ribosomal Pseudogene 107                                                             | Pseudogene     | 6  | GC02P154590 | 1.068448901 | <a href="https://www.genecards.org/cgi-bin/carddisp.pl?gene=RNA5SP107">https://www.genecards.org/cgi-bin/carddisp.pl?gene=RNA5SP107</a>             |
| RNU7-165P       | RNA, U7 Small Nuclear 165 Pseudogene                                                         | Pseudogene     | 6  | GC10P113353 | 1.068448901 | <a href="https://www.genecards.org/cgi-bin/carddisp.pl?gene=RNU7-165P">https://www.genecards.org/cgi-bin/carddisp.pl?gene=RNU7-165P</a>             |
| RPL21P41        | Ribosomal Protein L21 Pseudogene 41                                                          | Pseudogene     | 6  | GC03P066638 | 1.068448901 | <a href="https://www.genecards.org/cgi-bin/carddisp.pl?gene=RPL21P41">https://www.genecards.org/cgi-bin/carddisp.pl?gene=RPL21P41</a>               |
| RPS20P25        | Ribosomal Protein S20 Pseudogene 25                                                          | Pseudogene     | 6  | GC09P081410 | 1.068448901 | <a href="https://www.genecards.org/cgi-bin/carddisp.pl?gene=RPS20P25">https://www.genecards.org/cgi-bin/carddisp.pl?gene=RPS20P25</a>               |
| RNA5SP173       | RNA, 5S Ribosomal Pseudogene 173                                                             | Pseudogene     | 6  | GC04P178406 | 1.068448901 | <a href="https://www.genecards.org/cgi-bin/carddisp.pl?gene=RNA5SP173">https://www.genecards.org/cgi-bin/carddisp.pl?gene=RNA5SP173</a>             |
| ENSG00000288545 | Novel Transcript, Antisense To SLC14A1 And SLC14A2                                           | RNA gene       | 6  | GC18M045671 | 1.068448901 | <a href="https://www.genecards.org/cgi-bin/carddisp.pl?gene=ENSG00000288545">https://www.genecards.org/cgi-bin/carddisp.pl?gene=ENSG00000288545</a> |

|                   |                                                                                |                |   |             |             |                                                                      |
|-------------------|--------------------------------------------------------------------------------|----------------|---|-------------|-------------|----------------------------------------------------------------------|
| ENSG00000270001   | Novel Transcript                                                               | RNA gene       | 6 | GC20M023632 | 1.068448901 | https://www.genecards.org/cgi-bin/carddisp.pl?gene=ENSG00000270001   |
| ENSG00000260202   | Novel Transcript                                                               | RNA gene       | 6 | GC20M023481 | 1.068448901 | https://www.genecards.org/cgi-bin/carddisp.pl?gene=ENSG00000260202   |
| ENSG00000261063   | Novel Transcript, Antisense To MON1B & SYCE1L                                  | RNA gene       | 6 | GC16M077201 | 1.068448901 | https://www.genecards.org/cgi-bin/carddisp.pl?gene=ENSG00000261063   |
| ENSG00000202169   | Y RNA                                                                          | RNA gene       | 6 | GC04P061906 | 1.068448901 | https://www.genecards.org/cgi-bin/carddisp.pl?gene=ENSG00000202169   |
| ENSG00000231421   | Novel Transcript                                                               | RNA gene       | 6 | GC17M031529 | 1.068448901 | https://www.genecards.org/cgi-bin/carddisp.pl?gene=ENSG00000231421   |
| ENSG00000235450   | Novel Transcript                                                               | RNA gene       | 6 | GC07M091366 | 1.068448901 | https://www.genecards.org/cgi-bin/carddisp.pl?gene=ENSG00000235450   |
| ENSG00000251330   | Novel Transcript, Antisense To FBXO38                                          | RNA gene       | 6 | GC05M148430 | 1.068448901 | https://www.genecards.org/cgi-bin/carddisp.pl?gene=ENSG00000251330   |
| ENSG00000237719   | Nudix (Nucleoside Diphosphate Linked Moiety X) Type 5 Motif (NUDT5) Pseudogene | Pseudogene     | 6 | GC06M049263 | 1.068448901 | https://www.genecards.org/cgi-bin/carddisp.pl?gene=ENSG00000237719   |
| ENSG00000222529   | Y RNA                                                                          | RNA gene       | 6 | GC11P118970 | 1.068448901 | https://www.genecards.org/cgi-bin/carddisp.pl?gene=ENSG00000222529   |
| ENSG00000249678   | Novel Transcript                                                               | RNA gene       | 6 | GC04M030777 | 1.068448901 | https://www.genecards.org/cgi-bin/carddisp.pl?gene=ENSG00000249678   |
| ENSG00000262879   | Novel Transcript                                                               | RNA gene       | 6 | GC17M046982 | 1.068448901 | https://www.genecards.org/cgi-bin/carddisp.pl?gene=ENSG00000262879   |
| ENSG00000262979   | Novel Transcript                                                               | RNA gene       | 6 | GC17P080315 | 1.068448901 | https://www.genecards.org/cgi-bin/carddisp.pl?gene=ENSG00000262979   |
| ENSG00000261285   | Novel Transcript                                                               | RNA gene       | 6 | GC16M082449 | 1.068448901 | https://www.genecards.org/cgi-bin/carddisp.pl?gene=ENSG00000261285   |
| HNRNPA1P67        | Heterogeneous Nuclear Ribonucleoprotein A1 Pseudogene 67                       | Pseudogene     | 5 | GC04P072807 | 1.068448901 | https://www.genecards.org/cgi-bin/carddisp.pl?gene=HNRNPA1P67        |
| RNU4-64P          | RNA, U4 Small Nuclear 64, Pseudogene                                           | Pseudogene     | 5 | GC04M186026 | 1.068448901 | https://www.genecards.org/cgi-bin/carddisp.pl?gene=RNU4-64P          |
| RNU4ATAC9P        | RNA, U4atac Small Nuclear 9, Pseudogene                                        | Pseudogene     | 5 | GC04P072965 | 1.068448901 | https://www.genecards.org/cgi-bin/carddisp.pl?gene=RNU4ATAC9P        |
| RNU6-102P         | RNA, U6 Small Nuclear 102, Pseudogene                                          | Pseudogene     | 5 | GC07P124647 | 1.068448901 | https://www.genecards.org/cgi-bin/carddisp.pl?gene=RNU6-102P         |
| RNU6-560P         | RNA, U6 Small Nuclear 560, Pseudogene                                          | Pseudogene     | 5 | GC11P086153 | 1.068448901 | https://www.genecards.org/cgi-bin/carddisp.pl?gene=RNU6-560P         |
| RNU6-694P         | RNA, U6 Small Nuclear 694, Pseudogene                                          | Pseudogene     | 5 | GC09M004387 | 1.068448901 | https://www.genecards.org/cgi-bin/carddisp.pl?gene=RNU6-694P         |
| RN7SKP242         | RN7SK Pseudogene 242                                                           | Pseudogene     | 5 | GC09M086717 | 1.068448901 | https://www.genecards.org/cgi-bin/carddisp.pl?gene=RN7SKP242         |
| RNA5SP63          | RNA, 5S Ribosomal Pseudogene 63                                                | Pseudogene     | 5 | GC01P163510 | 1.068448901 | https://www.genecards.org/cgi-bin/carddisp.pl?gene=RNA5SP63          |
| RNA5SP360         | RNA, 5S Ribosomal Pseudogene 360                                               | Pseudogene     | 5 | GC12P041658 | 1.068448901 | https://www.genecards.org/cgi-bin/carddisp.pl?gene=RNA5SP360         |
| SNORA120          | Small Nucleolar RNA, H/ACA Box 120                                             | RNA gene       | 5 | GC12M006041 | 1.068448901 | https://www.genecards.org/cgi-bin/carddisp.pl?gene=SNORA120          |
| ZBED1P1           | Zinc Finger BED-Type Containing 1 Pseudogene 1                                 | Pseudogene     | 5 | GC04P110277 | 1.068448901 | https://www.genecards.org/cgi-bin/carddisp.pl?gene=ZBED1P1           |
| LOC101928255      | Uncharacterized LOC101928255                                                   | RNA gene       | 5 | GC21M042648 | 1.068448901 | https://www.genecards.org/cgi-bin/carddisp.pl?gene=LOC101928255      |
| LOC107985021      | Flocculation Protein FLO11-Like                                                | Protein coding | 5 | GC17P080720 | 1.068448901 | https://www.genecards.org/cgi-bin/carddisp.pl?gene=LOC107985021      |
| LOC107985022      | Uncharacterized LOC107985022                                                   | Protein coding | 5 | GC17M080961 | 1.068448901 | https://www.genecards.org/cgi-bin/carddisp.pl?gene=LOC107985022      |
| ENSG00000273218   | Novel Transcript                                                               | RNA gene       | 5 | GC19M015347 | 1.068448901 | https://www.genecards.org/cgi-bin/carddisp.pl?gene=ENSG00000273218   |
| lnc-RAB17-7       |                                                                                | RNA gene       | 5 | GC02M237356 | 1.068448901 | https://www.genecards.org/cgi-bin/carddisp.pl?gene=lnc-RAB17-7       |
| lnc-SBF2-3        |                                                                                | RNA gene       | 5 | GC11M009760 | 1.068448901 | https://www.genecards.org/cgi-bin/carddisp.pl?gene=lnc-SBF2-3        |
| lnc-RPS25-6       |                                                                                | RNA gene       | 5 | GC11M118918 | 1.068448901 | https://www.genecards.org/cgi-bin/carddisp.pl?gene=lnc-RPS25-6       |
| lnc-EED-4         |                                                                                | RNA gene       | 5 | GC11P086109 | 1.068448901 | https://www.genecards.org/cgi-bin/carddisp.pl?gene=lnc-EED-4         |
| lnc-VIPR2-1       |                                                                                | RNA gene       | 5 | GC07M159029 | 1.068448901 | https://www.genecards.org/cgi-bin/carddisp.pl?gene=lnc-VIPR2-1       |
| ENSG00000231344   | Novel Pseudogene                                                               | Pseudogene     | 5 | GC01P027739 | 1.068448901 | https://www.genecards.org/cgi-bin/carddisp.pl?gene=ENSG00000231344   |
| ENSG00000235023   | Novel Transcript                                                               | RNA gene       | 5 | GC21M042649 | 1.068448901 | https://www.genecards.org/cgi-bin/carddisp.pl?gene=ENSG00000235023   |
| MG828730-002      |                                                                                | RNA gene       | 5 | GC01P026703 | 1.068448901 | https://www.genecards.org/cgi-bin/carddisp.pl?gene=MG828730-002      |
| ENSG00000245869   | Novel Transcript, Antisense To CXCR5                                           | RNA gene       | 5 | GC11M118887 | 1.068448901 | https://www.genecards.org/cgi-bin/carddisp.pl?gene=ENSG00000245869   |
| ENSG00000269110   | Novel Transcript                                                               | RNA gene       | 5 | GC19M027250 | 1.068448901 | https://www.genecards.org/cgi-bin/carddisp.pl?gene=ENSG00000269110   |
| lnc-CXCR5-2       |                                                                                | RNA gene       | 5 | GC11P118940 | 1.068448901 | https://www.genecards.org/cgi-bin/carddisp.pl?gene=lnc-CXCR5-2       |
| NFU1P1            | NFU1 Iron-Sulfur Cluster Scaffold Pseudogene 1                                 | Pseudogene     | 4 | GC03P039644 | 1.068448901 | https://www.genecards.org/cgi-bin/carddisp.pl?gene=NFU1P1            |
| MTCYBP43          | MT-CYB Pseudogene 43                                                           | Pseudogene     | 4 | GC04M030884 | 1.068448901 | https://www.genecards.org/cgi-bin/carddisp.pl?gene=MTCYBP43          |
| TRMT112P7         | TRNA Methyltransferase Subunit 11-2 Pseudogene 7                               | Pseudogene     | 4 | GC08M054479 | 1.068448901 | https://www.genecards.org/cgi-bin/carddisp.pl?gene=TRMT112P7         |
| RNU7-92P          | RNA, U7 Small Nuclear 92 Pseudogene                                            | Pseudogene     | 4 | GC20P047969 | 1.068448901 | https://www.genecards.org/cgi-bin/carddisp.pl?gene=RNU7-92P          |
| ENSG00000284946   | Novel Protein                                                                  | Protein coding | 4 | GC15M090967 | 1.068448901 | https://www.genecards.org/cgi-bin/carddisp.pl?gene=ENSG00000284946   |
| ENSG00000287999   | Novel Transcript                                                               | RNA gene       | 4 | GC04M052252 | 1.068448901 | https://www.genecards.org/cgi-bin/carddisp.pl?gene=ENSG00000287999   |
| ENSG00000269779   | Zinc Finger Protein 85 Pseudogene                                              | Pseudogene     | 4 | GC19P020691 | 1.068448901 | https://www.genecards.org/cgi-bin/carddisp.pl?gene=ENSG00000269779   |
| HSALNG0080729-001 |                                                                                | RNA gene       | 4 | GC10P113178 | 1.068448901 | https://www.genecards.org/cgi-bin/carddisp.pl?gene=HSALNG0080729-001 |
| lnc-CCKAR-20      |                                                                                | RNA gene       | 4 | GC04M030885 | 1.068448901 | https://www.genecards.org/cgi-bin/carddisp.pl?gene=lnc-CCKAR-20      |
| lnc-MOCS2-5       |                                                                                | RNA gene       | 4 | GC05M053219 | 1.068448901 | https://www.genecards.org/cgi-bin/carddisp.pl?gene=lnc-MOCS2-5       |
| lnc-OR7C2-1       |                                                                                | RNA gene       | 4 | GC19P014939 | 1.068448901 | https://www.genecards.org/cgi-bin/carddisp.pl?gene=lnc-OR7C2-1       |
| lnc-POP1-1        |                                                                                | RNA gene       | 4 | GC08P098177 | 1.068448901 | https://www.genecards.org/cgi-bin/carddisp.pl?gene=lnc-POP1-1        |
| lnc-RAB44-3       |                                                                                | RNA gene       | 4 | GC06P059419 | 1.068448901 | https://www.genecards.org/cgi-bin/carddisp.pl?gene=lnc-RAB44-3       |
| lnc-RSPH1-4       |                                                                                | RNA gene       | 4 | GC21M042651 | 1.068448901 | https://www.genecards.org/cgi-bin/carddisp.pl?gene=lnc-RSPH1-4       |
| lnc-SLC2A6-3      |                                                                                | RNA gene       | 4 | GC09M133460 | 1.068448901 | https://www.genecards.org/cgi-bin/carddisp.pl?gene=lnc-SLC2A6-3      |
| ENSG00000242068   | Ring Finger Protein 13 (RNF13) Pseudogene                                      | Pseudogene     | 4 | GC03M180772 | 1.068448901 | https://www.genecards.org/cgi-bin/carddisp.pl?gene=ENSG00000242068   |
| lnc-SWAP70-4      |                                                                                | RNA gene       | 4 | GC11P009764 | 1.068448901 | https://www.genecards.org/cgi-bin/carddisp.pl?gene=lnc-SWAP70-4      |
| lnc-TRIM49D1-2    |                                                                                | RNA gene       | 4 | GC11M090201 | 1.068448901 | https://www.genecards.org/cgi-bin/carddisp.pl?gene=lnc-TRIM49D1-2    |
| MN298114-198      |                                                                                | RNA gene       | 4 | GC06M050098 | 1.068448901 | https://www.genecards.org/cgi-bin/carddisp.pl?gene=MN298114-198      |
| HSALNG0082631     |                                                                                | RNA gene       | 4 | GC11P009759 | 1.068448901 | https://www.genecards.org/cgi-bin/carddisp.pl?gene=HSALNG0082631     |
| HSALNG0087588     |                                                                                | RNA gene       | 4 | GC11M118929 | 1.068448901 | https://www.genecards.org/cgi-bin/carddisp.pl?gene=HSALNG0087588     |
| HSALNG0099362     |                                                                                | RNA gene       | 4 | GC13P110298 | 1.068448901 | https://www.genecards.org/cgi-bin/carddisp.pl?gene=HSALNG0099362     |
| lnc-CHORDC1-1     |                                                                                | RNA gene       | 4 | GC11M090194 | 1.068448901 | https://www.genecards.org/cgi-bin/carddisp.pl?gene=lnc-CHORDC1-1     |
| lnc-PIGV-3        |                                                                                | RNA gene       | 4 | GC01P026748 | 1.068448901 | https://www.genecards.org/cgi-bin/carddisp.pl?gene=lnc-PIGV-3        |
| lnc-USP28-3       |                                                                                | RNA gene       | 4 | GC11M113848 | 1.068448901 | https://www.genecards.org/cgi-bin/carddisp.pl?gene=lnc-USP28-3       |
| HSALNG0087589     |                                                                                | RNA gene       | 4 | GC11P118941 | 1.068448901 | https://www.genecards.org/cgi-bin/carddisp.pl?gene=HSALNG0087589     |
| HSALNG0031388-001 |                                                                                | RNA gene       | 4 | GC03P186976 | 1.068448901 | https://www.genecards.org/cgi-bin/carddisp.pl?gene=HSALNG0031388-001 |
| HSALNG0031388-002 |                                                                                | RNA gene       | 4 | GC03P186977 | 1.068448901 | https://www.genecards.org/cgi-bin/carddisp.pl?gene=HSALNG0031388-002 |
| HSALNG0049754     |                                                                                | RNA gene       | 4 | GC06P059017 | 1.068448901 | https://www.genecards.org/cgi-bin/carddisp.pl?gene=HSALNG0049754     |
| HSALNG0087578     |                                                                                | RNA gene       | 4 | GC11P118845 | 1.068448901 | https://www.genecards.org/cgi-bin/carddisp.pl?gene=HSALNG0087578     |
| HSALNG0099364     |                                                                                | RNA gene       | 4 | GC13M110312 | 1.068448901 | https://www.genecards.org/cgi-bin/carddisp.pl?gene=HSALNG0099364     |
| HSALNG0099363     |                                                                                | RNA gene       | 4 | GC13P110307 | 1.068448901 | https://www.genecards.org/cgi-bin/carddisp.pl?gene=HSALNG0099363     |
| lnc-C7orf50-1     |                                                                                | RNA gene       | 4 | GC07M001152 | 1.068448901 | https://www.genecards.org/cgi-bin/carddisp.pl?gene=lnc-C7orf50-1     |
| piR-44098         |                                                                                | RNA gene       | 4 | GC11M009755 | 1.068448901 | https://www.genecards.org/cgi-bin/carddisp.pl?gene=piR-44098         |

|                     |                                                   |            |   |              |             |                                                                        |
|---------------------|---------------------------------------------------|------------|---|--------------|-------------|------------------------------------------------------------------------|
| piR-57460-243       |                                                   | RNA gene   | 4 | GC16M015975  | 1.068448901 | https://www.genecards.org/cgi-bin/carddisp.pl?gene=piR-57460-243       |
| lnc-FST-6           |                                                   | RNA gene   | 4 | GC05P053338  | 1.068448901 | https://www.genecards.org/cgi-bin/carddisp.pl?gene=lnc-FST-6           |
| lnc-TMEM105-1       |                                                   | RNA gene   | 4 | GC17M080339  | 1.068448901 | https://www.genecards.org/cgi-bin/carddisp.pl?gene=lnc-TMEM105-1       |
| lnc-ZNF66-3         |                                                   | RNA gene   | 4 | GC19P028081  | 1.068448901 | https://www.genecards.org/cgi-bin/carddisp.pl?gene=lnc-ZNF66-3         |
| RF00017-107         |                                                   | RNA gene   | 4 | GC01M026710  | 1.068448901 | https://www.genecards.org/cgi-bin/carddisp.pl?gene=RF00017-107         |
| RF00017-2376        |                                                   | RNA gene   | 4 | GC17P080758  | 1.068448901 | https://www.genecards.org/cgi-bin/carddisp.pl?gene=RF00017-2376        |
| OA985837            |                                                   | RNA gene   | 4 | GC10P103798  | 1.068448901 | https://www.genecards.org/cgi-bin/carddisp.pl?gene=OA985837            |
| lnc-CXCL6-3         |                                                   | RNA gene   | 4 | GC04P073743  | 1.068448901 | https://www.genecards.org/cgi-bin/carddisp.pl?gene=lnc-CXCL6-3         |
| NONHSAG036923.2-001 |                                                   | RNA gene   | 4 | GC03P186963  | 1.068448901 | https://www.genecards.org/cgi-bin/carddisp.pl?gene=NONHSAG036923.2-001 |
| NONHSAG036923.2-002 |                                                   | RNA gene   | 4 | GC03P186964  | 1.068448901 | https://www.genecards.org/cgi-bin/carddisp.pl?gene=NONHSAG036923.2-002 |
| RF00017-5070        |                                                   | RNA gene   | 4 | GC06P060841  | 1.068448901 | https://www.genecards.org/cgi-bin/carddisp.pl?gene=RF00017-5070        |
| RF00017-5072        |                                                   | RNA gene   | 4 | GC06M050905  | 1.068448901 | https://www.genecards.org/cgi-bin/carddisp.pl?gene=RF00017-5072        |
| RF00017-5074        |                                                   | RNA gene   | 4 | GC06M050906  | 1.068448901 | https://www.genecards.org/cgi-bin/carddisp.pl?gene=RF00017-5074        |
| RF00017-6239        |                                                   | RNA gene   | 4 | GC07P140406  | 1.068448901 | https://www.genecards.org/cgi-bin/carddisp.pl?gene=RF00017-6239        |
| RF00017-6240        |                                                   | RNA gene   | 4 | GC07P140414  | 1.068448901 | https://www.genecards.org/cgi-bin/carddisp.pl?gene=RF00017-6240        |
| SGO1P2              | Shugoshin 1 Pseudogene 2                          | Pseudogene | 3 | GC07M052892  | 1.068448901 | https://www.genecards.org/cgi-bin/carddisp.pl?gene=SGO1P2              |
| LOC107984869        | Uncharacterized LOC107984869                      | RNA gene   | 3 | GC16M015902  | 1.068448901 | https://www.genecards.org/cgi-bin/carddisp.pl?gene=LOC107984869        |
| HSALNG0011563       |                                                   | RNA gene   | 3 | GC01P233636  | 1.068448901 | https://www.genecards.org/cgi-bin/carddisp.pl?gene=HSALNG0011563       |
| HSALNG0076746-001   |                                                   | RNA gene   | 3 | GC10M024758  | 1.068448901 | https://www.genecards.org/cgi-bin/carddisp.pl?gene=HSALNG0076746-001   |
| HSALNG0076749       |                                                   | RNA gene   | 3 | GC10P024809  | 1.068448901 | https://www.genecards.org/cgi-bin/carddisp.pl?gene=HSALNG0076749       |
| FJ601684-376        |                                                   | RNA gene   | 3 | GC05M053354  | 1.068448901 | https://www.genecards.org/cgi-bin/carddisp.pl?gene=FJ601684-376        |
| AB372791            |                                                   | RNA gene   | 3 | GC03P186785  | 1.068448901 | https://www.genecards.org/cgi-bin/carddisp.pl?gene=AB372791            |
| lnc-TEFM-7          |                                                   | RNA gene   | 3 | GC17M031540  | 1.068448901 | https://www.genecards.org/cgi-bin/carddisp.pl?gene=lnc-TEFM-7          |
| MK280144-551        |                                                   | RNA gene   | 3 | GC05P053410  | 1.068448901 | https://www.genecards.org/cgi-bin/carddisp.pl?gene=MK280144-551        |
| HSALNG0121262-003   |                                                   | RNA gene   | 3 | GC18M045767  | 1.068448901 | https://www.genecards.org/cgi-bin/carddisp.pl?gene=HSALNG0121262-003   |
| lnc-FBXO38-1        |                                                   | RNA gene   | 3 | GC05P148452  | 1.068448901 | https://www.genecards.org/cgi-bin/carddisp.pl?gene=lnc-FBXO38-1        |
| HSALNG0112598       |                                                   | RNA gene   | 3 | GC16P072981  | 1.068448901 | https://www.genecards.org/cgi-bin/carddisp.pl?gene=HSALNG0112598       |
| HSALNG0116963       |                                                   | RNA gene   | 3 | GC17M046940  | 1.068448901 | https://www.genecards.org/cgi-bin/carddisp.pl?gene=HSALNG0116963       |
| HSALNG0119185       |                                                   | RNA gene   | 3 | GC17P080289  | 1.068448901 | https://www.genecards.org/cgi-bin/carddisp.pl?gene=HSALNG0119185       |
| HSALNG0035165       |                                                   | RNA gene   | 3 | GC04P073741  | 1.068448901 | https://www.genecards.org/cgi-bin/carddisp.pl?gene=HSALNG0035165       |
| HSALNG0039707-001   |                                                   | RNA gene   | 3 | GC05M003125  | 1.068448901 | https://www.genecards.org/cgi-bin/carddisp.pl?gene=HSALNG0039707-001   |
| HSALNG0039707-002   |                                                   | RNA gene   | 3 | GC05M003131  | 1.068448901 | https://www.genecards.org/cgi-bin/carddisp.pl?gene=HSALNG0039707-002   |
| HSALNG0055618       |                                                   | RNA gene   | 3 | GC07M001336  | 1.068448901 | https://www.genecards.org/cgi-bin/carddisp.pl?gene=HSALNG0055618       |
| HSALNG0062832       |                                                   | RNA gene   | 3 | GC07P159061  | 1.068448901 | https://www.genecards.org/cgi-bin/carddisp.pl?gene=HSALNG0062832       |
| LOC642355           | Nucleoside Diphosphate Kinase, Mitochondrial-Like | Pseudogene | 3 | GC07M1140435 | 1.068448901 | https://www.genecards.org/cgi-bin/carddisp.pl?gene=LOC642355           |
| piR-43222           |                                                   | RNA gene   | 3 | GC16M073004  | 1.068448901 | https://www.genecards.org/cgi-bin/carddisp.pl?gene=piR-43222           |
| piR-48209-548       |                                                   | RNA gene   | 3 | GC05M003091  | 1.068448901 | https://www.genecards.org/cgi-bin/carddisp.pl?gene=piR-48209-548       |
| HSALNG0088814       |                                                   | RNA gene   | 3 | GC12M006064  | 1.068448901 | https://www.genecards.org/cgi-bin/carddisp.pl?gene=HSALNG0088814       |
| HSALNG0119064       |                                                   | RNA gene   | 3 | GC17M078802  | 1.068448901 | https://www.genecards.org/cgi-bin/carddisp.pl?gene=HSALNG0119064       |
| HSALNG0130581       |                                                   | RNA gene   | 3 | GC20P047972  | 1.068448901 | https://www.genecards.org/cgi-bin/carddisp.pl?gene=HSALNG0130581       |
| piR-43106-098       |                                                   | RNA gene   | 3 | GC17M078804  | 1.068448901 | https://www.genecards.org/cgi-bin/carddisp.pl?gene=piR-43106-098       |
| piR-57337-010       |                                                   | RNA gene   | 3 | GC11M086112  | 1.068448901 | https://www.genecards.org/cgi-bin/carddisp.pl?gene=piR-57337-010       |
| lnc-FBXO38-2        |                                                   | RNA gene   | 3 | GC05P148477  | 1.068448901 | https://www.genecards.org/cgi-bin/carddisp.pl?gene=lnc-FBXO38-2        |
| piR-50444-432       |                                                   | RNA gene   | 3 | GC07M070439  | 1.068448901 | https://www.genecards.org/cgi-bin/carddisp.pl?gene=piR-50444-432       |
| piR-34154           |                                                   | RNA gene   | 3 | GC07P159099  | 1.068448901 | https://www.genecards.org/cgi-bin/carddisp.pl?gene=piR-34154           |
| lnc-DDR2-3          |                                                   | RNA gene   | 3 | GC01P162607  | 1.068448901 | https://www.genecards.org/cgi-bin/carddisp.pl?gene=lnc-DDR2-3          |
| piR-31432-181       |                                                   | RNA gene   | 3 | GC14P051366  | 1.068448901 | https://www.genecards.org/cgi-bin/carddisp.pl?gene=piR-31432-181       |
| RF00026-195         |                                                   | RNA gene   | 3 | GC11P086156  | 1.068448901 | https://www.genecards.org/cgi-bin/carddisp.pl?gene=RF00026-195         |
| RF00017-5823        |                                                   | RNA gene   | 3 | GC07P070457  | 1.068448901 | https://www.genecards.org/cgi-bin/carddisp.pl?gene=RF00017-5823        |
| RF00066-041         |                                                   | RNA gene   | 3 | GC11M113865  | 1.068448901 | https://www.genecards.org/cgi-bin/carddisp.pl?gene=RF00066-041         |
| LOC105378490        | Uncharacterized LOC105378490                      | RNA gene   | 2 | GC10P113306  | 1.068448901 | https://www.genecards.org/cgi-bin/carddisp.pl?gene=LOC105378490        |
| LOC105375660        | Uncharacterized LOC105375660                      | RNA gene   | 2 | GC08P098176  | 1.068448901 | https://www.genecards.org/cgi-bin/carddisp.pl?gene=LOC105375660        |
| HSALNG0025301-001   |                                                   | RNA gene   | 2 | GC03P039667  | 1.068448901 | https://www.genecards.org/cgi-bin/carddisp.pl?gene=HSALNG0025301-001   |
| HSALNG0059488       |                                                   | RNA gene   | 2 | GC07M091514  | 1.068448901 | https://www.genecards.org/cgi-bin/carddisp.pl?gene=HSALNG0059488       |
| HSALNG0074045-002   |                                                   | RNA gene   | 2 | GC09P118060  | 1.068448901 | https://www.genecards.org/cgi-bin/carddisp.pl?gene=HSALNG0074045-002   |
| HSALNG0076128       |                                                   | RNA gene   | 2 | GC10M010484  | 1.068448901 | https://www.genecards.org/cgi-bin/carddisp.pl?gene=HSALNG0076128       |
| HSALNG0059492       |                                                   | RNA gene   | 2 | GC07P091550  | 1.068448901 | https://www.genecards.org/cgi-bin/carddisp.pl?gene=HSALNG0059492       |
| HSALNG0007119       |                                                   | RNA gene   | 2 | GC01M151172  | 1.068448901 | https://www.genecards.org/cgi-bin/carddisp.pl?gene=HSALNG0007119       |
| HSALNG0080735       |                                                   | RNA gene   | 2 | GC10M113271  | 1.068448901 | https://www.genecards.org/cgi-bin/carddisp.pl?gene=HSALNG0080735       |
| HSALNG0101240       |                                                   | RNA gene   | 2 | GC14M051345  | 1.068448901 | https://www.genecards.org/cgi-bin/carddisp.pl?gene=HSALNG0101240       |
| HSALNG0124379       |                                                   | RNA gene   | 2 | GC19P015457  | 1.068448901 | https://www.genecards.org/cgi-bin/carddisp.pl?gene=HSALNG0124379       |
| lnc-CST8-1          |                                                   | RNA gene   | 2 | GC20P023503  | 1.068448901 | https://www.genecards.org/cgi-bin/carddisp.pl?gene=lnc-CST8-1          |
| lnc-PLCB2-1-001     |                                                   | RNA gene   | 2 | GC15M040308  | 1.068448901 | https://www.genecards.org/cgi-bin/carddisp.pl?gene=lnc-PLCB2-1-001     |
| lnc-SIGLEC15-1      |                                                   | RNA gene   | 2 | GC18P045868  | 1.068448901 | https://www.genecards.org/cgi-bin/carddisp.pl?gene=lnc-SIGLEC15-1      |
| lnc-SLC1A1-7        |                                                   | RNA gene   | 2 | GC09P004478  | 1.068448901 | https://www.genecards.org/cgi-bin/carddisp.pl?gene=lnc-SLC1A1-7        |
| lnc-SGCB-1          |                                                   | RNA gene   | 2 | GC04M052162  | 1.068448901 | https://www.genecards.org/cgi-bin/carddisp.pl?gene=lnc-SGCB-1          |
| lnc-SPATA18-4       |                                                   | RNA gene   | 2 | GC04P052197  | 1.068448901 | https://www.genecards.org/cgi-bin/carddisp.pl?gene=lnc-SPATA18-4       |
| lnc-TERF2IP-6       |                                                   | RNA gene   | 2 | GC16P075792  | 1.068448901 | https://www.genecards.org/cgi-bin/carddisp.pl?gene=lnc-TERF2IP-6       |
| MK280144-221        |                                                   | RNA gene   | 2 | GC15M108927  | 1.068448901 | https://www.genecards.org/cgi-bin/carddisp.pl?gene=MK280144-221        |

|                   |                                                                                           |                   |    |             |             |                                                                      |
|-------------------|-------------------------------------------------------------------------------------------|-------------------|----|-------------|-------------|----------------------------------------------------------------------|
| HSALNG0090516     |                                                                                           | RNA gene          | 2  | GC12M041584 | 1.068448901 | https://www.genecards.org/cgi-bin/carddisp.pl?gene=HSALNG0090516     |
| HSALNG0110658     |                                                                                           | RNA gene          | 2  | GC16P033762 | 1.068448901 | https://www.genecards.org/cgi-bin/carddisp.pl?gene=HSALNG0110658     |
| lnc-ADAMTS18-12   |                                                                                           | RNA gene          | 2  | GC16M077207 | 1.068448901 | https://www.genecards.org/cgi-bin/carddisp.pl?gene=lnc-ADAMTS18-12   |
| lnc-MKRN1-1       |                                                                                           | RNA gene          | 2  | GC07M140437 | 1.068448901 | https://www.genecards.org/cgi-bin/carddisp.pl?gene=lnc-MKRN1-1       |
| lnc-PRC1-3        |                                                                                           | RNA gene          | 2  | GC15M091013 | 1.068448901 | https://www.genecards.org/cgi-bin/carddisp.pl?gene=lnc-PRC1-3        |
| HSALNG0119063     |                                                                                           | RNA gene          | 2  | GC17P078798 | 1.068448901 | https://www.genecards.org/cgi-bin/carddisp.pl?gene=HSALNG0119063     |
| HSALNG0124827     |                                                                                           | RNA gene          | 2  | GC19P028195 | 1.068448901 | https://www.genecards.org/cgi-bin/carddisp.pl?gene=HSALNG0124827     |
| HSALNG0133334     |                                                                                           | RNA gene          | 2  | GC21M042664 | 1.068448901 | https://www.genecards.org/cgi-bin/carddisp.pl?gene=HSALNG0133334     |
| HSALNG0034390     |                                                                                           | RNA gene          | 2  | GC04P052198 | 1.068448901 | https://www.genecards.org/cgi-bin/carddisp.pl?gene=HSALNG0034390     |
| HSALNG0039132     |                                                                                           | RNA gene          | 2  | GC04M185963 | 1.068448901 | https://www.genecards.org/cgi-bin/carddisp.pl?gene=HSALNG0039132     |
| HSALNG0071141     |                                                                                           | RNA gene          | 2  | GC09P038546 | 1.068448901 | https://www.genecards.org/cgi-bin/carddisp.pl?gene=HSALNG0071141     |
| HSALNG0059497     |                                                                                           | RNA gene          | 2  | GC07P091581 | 1.068448901 | https://www.genecards.org/cgi-bin/carddisp.pl?gene=HSALNG0059497     |
| HSALNG0063178-002 |                                                                                           | RNA gene          | 2  | GC08P006997 | 1.068448901 | https://www.genecards.org/cgi-bin/carddisp.pl?gene=HSALNG0063178-002 |
| HSALNG0063178-003 |                                                                                           | RNA gene          | 2  | GC08P007017 | 1.068448901 | https://www.genecards.org/cgi-bin/carddisp.pl?gene=HSALNG0063178-003 |
| HSALNG0075010     |                                                                                           | RNA gene          | 2  | GC09M133459 | 1.068448901 | https://www.genecards.org/cgi-bin/carddisp.pl?gene=HSALNG0075010     |
| piR-35581         |                                                                                           | RNA gene          | 2  | GC03P180871 | 1.068448901 | https://www.genecards.org/cgi-bin/carddisp.pl?gene=piR-35581         |
| HSALNG0107907     |                                                                                           | RNA gene          | 2  | GC15M086636 | 1.068448901 | https://www.genecards.org/cgi-bin/carddisp.pl?gene=HSALNG0107907     |
| HSALNG0108471     |                                                                                           | RNA gene          | 2  | GC15P100787 | 1.068448901 | https://www.genecards.org/cgi-bin/carddisp.pl?gene=HSALNG0108471     |
| HSALNG0113053     |                                                                                           | RNA gene          | 2  | GC16P082605 | 1.068448901 | https://www.genecards.org/cgi-bin/carddisp.pl?gene=HSALNG0113053     |
| HSALNG0115879     |                                                                                           | RNA gene          | 2  | GC17M034505 | 1.068448901 | https://www.genecards.org/cgi-bin/carddisp.pl?gene=HSALNG0115879     |
| HSALNG0115880     |                                                                                           | RNA gene          | 2  | GC17M034549 | 1.068448901 | https://www.genecards.org/cgi-bin/carddisp.pl?gene=HSALNG0115880     |
| HSALNG0121281     |                                                                                           | RNA gene          | 2  | GC18P045869 | 1.068448901 | https://www.genecards.org/cgi-bin/carddisp.pl?gene=HSALNG0121281     |
| piR-55361-415     |                                                                                           | RNA gene          | 2  | GC04P061944 | 1.068448901 | https://www.genecards.org/cgi-bin/carddisp.pl?gene=piR-55361-415     |
| lnc-SEZ6L2-1      |                                                                                           | RNA gene          | 2  | GC16M029919 | 1.068448901 | https://www.genecards.org/cgi-bin/carddisp.pl?gene=lnc-SEZ6L2-1      |
| lnc-TTC14-3       |                                                                                           | RNA gene          | 2  | GC03P180869 | 1.068448901 | https://www.genecards.org/cgi-bin/carddisp.pl?gene=lnc-TTC14-3       |
| piR-36756-006     |                                                                                           | RNA gene          | 2  | GC01M157341 | 1.068448901 | https://www.genecards.org/cgi-bin/carddisp.pl?gene=piR-36756-006     |
| piR-38562-016     |                                                                                           | RNA gene          | 2  | GC12M023156 | 1.068448901 | https://www.genecards.org/cgi-bin/carddisp.pl?gene=piR-38562-016     |
| piR-55985-066     |                                                                                           | RNA gene          | 2  | GC16M077215 | 1.068448901 | https://www.genecards.org/cgi-bin/carddisp.pl?gene=piR-55985-066     |
| piR-58712         |                                                                                           | RNA gene          | 2  | GC17P046942 | 1.068448901 | https://www.genecards.org/cgi-bin/carddisp.pl?gene=piR-58712         |
| NONHSAG020037.2   |                                                                                           | RNA gene          | 2  | GC16P077199 | 1.068448901 | https://www.genecards.org/cgi-bin/carddisp.pl?gene=NONHSAG020037.2   |
| piR-32214-308     |                                                                                           | RNA gene          | 2  | GC18P045882 | 1.068448901 | https://www.genecards.org/cgi-bin/carddisp.pl?gene=piR-32214-308     |
| MN309174-501      |                                                                                           | RNA gene          | 2  | GC04P052277 | 1.068448901 | https://www.genecards.org/cgi-bin/carddisp.pl?gene=MN309174-501      |
| piR-33101-001     |                                                                                           | RNA gene          | 2  | GC01P157320 | 1.068448901 | https://www.genecards.org/cgi-bin/carddisp.pl?gene=piR-33101-001     |
| lnc-DEFA1B-1-002  |                                                                                           | RNA gene          | 2  | GC08M007007 | 1.068448901 | https://www.genecards.org/cgi-bin/carddisp.pl?gene=lnc-DEFA1B-1-002  |
| RF00026-1082      |                                                                                           | RNA gene          | 2  | GC08M098197 | 1.068448901 | https://www.genecards.org/cgi-bin/carddisp.pl?gene=RF00026-1082      |
| RF00998-050       |                                                                                           | RNA gene          | 2  | GC15M086793 | 1.068448901 | https://www.genecards.org/cgi-bin/carddisp.pl?gene=RF00998-050       |
| LOC105375855      | Uncharacterized LOC105375855                                                              | RNA gene          | 1  | GC08P057462 | 1.068448901 | https://www.genecards.org/cgi-bin/carddisp.pl?gene=LOC105375855      |
| LOC105370935      | Uncharacterized LOC105370935                                                              | RNA gene          | 1  | GC15M083944 | 1.068448901 | https://www.genecards.org/cgi-bin/carddisp.pl?gene=LOC105370935      |
| LOC107986462      | Uncharacterized LOC107986462                                                              | RNA gene          | 1  | GC05P148453 | 1.068448901 | https://www.genecards.org/cgi-bin/carddisp.pl?gene=LOC107986462      |
| LOC105374240      | Uncharacterized LOC105374240                                                              | RNA gene          | 1  | GC03P180867 | 1.068448901 | https://www.genecards.org/cgi-bin/carddisp.pl?gene=LOC105374240      |
| HSALNG0061800     |                                                                                           | RNA gene          | 1  | GC07M140427 | 1.068448901 | https://www.genecards.org/cgi-bin/carddisp.pl?gene=HSALNG0061800     |
| HSALNG0074045-001 |                                                                                           | RNA gene          | 1  | GC09P118059 | 1.068448901 | https://www.genecards.org/cgi-bin/carddisp.pl?gene=HSALNG0074045-001 |
| HSALNG0020602     |                                                                                           | RNA gene          | 1  | GC02P176326 | 1.068448901 | https://www.genecards.org/cgi-bin/carddisp.pl?gene=HSALNG0020602     |
| ENSG00000103200   | Non-Metastatic Cells 4, Protein Expressed In (NME4) Pseudogene                            | Pseudogene        | 1  | GC07M140436 | 1.068448901 | https://www.genecards.org/cgi-bin/carddisp.pl?gene=ENSG00000103200   |
| piR-39341-170     |                                                                                           | RNA gene          | 1  | GC18M035792 | 1.068448901 | https://www.genecards.org/cgi-bin/carddisp.pl?gene=piR-39341-170     |
| piR-61240-147     |                                                                                           | RNA gene          | 1  | GC02P176311 | 1.068448901 | https://www.genecards.org/cgi-bin/carddisp.pl?gene=piR-61240-147     |
| piR-46381-051     |                                                                                           | RNA gene          | 1  | GC03M039767 | 1.068448901 | https://www.genecards.org/cgi-bin/carddisp.pl?gene=piR-46381-051     |
| piR-37081-005     |                                                                                           | RNA gene          | 1  | GC03M039738 | 1.068448901 | https://www.genecards.org/cgi-bin/carddisp.pl?gene=piR-37081-005     |
| piR-56120         |                                                                                           | RNA gene          | 1  | GC01M003137 | 1.068448901 | https://www.genecards.org/cgi-bin/carddisp.pl?gene=piR-56120         |
| piR-30188-105     |                                                                                           | RNA gene          | 1  | GC20P023515 | 1.068448901 | https://www.genecards.org/cgi-bin/carddisp.pl?gene=piR-30188-105     |
| piR-33945         |                                                                                           | RNA gene          | 1  | GC01M003134 | 1.068448901 | https://www.genecards.org/cgi-bin/carddisp.pl?gene=piR-33945         |
| FOXO3             | Forkhead Box O3                                                                           | Protein coding    | 44 | GC06P108559 | 1.065283656 | https://www.genecards.org/cgi-bin/carddisp.pl?gene=FOXO3             |
| MCEMP1            | Mast Cell Expressed Membrane Protein 1                                                    | Protein coding    | 29 | GC19P007676 | 1.064950705 | https://www.genecards.org/cgi-bin/carddisp.pl?gene=MCEMP1            |
| PLCG1             | Phospholipase C $\gamma$ 1                                                                | Protein coding    | 48 | GC20P041136 | 1.063918352 | https://www.genecards.org/cgi-bin/carddisp.pl?gene=PLCG1             |
| SEMA7A            | Semaphorin 7A (John Milton Hagen Blood Group)                                             | Protein coding    | 42 | GC15M074409 | 1.061660886 | https://www.genecards.org/cgi-bin/carddisp.pl?gene=SEMA7A            |
| B3GAT1            | $\beta$ -1,3-Glucuronyltransferase 1                                                      | Protein coding    | 43 | GC11M134378 | 1.060500979 | https://www.genecards.org/cgi-bin/carddisp.pl?gene=B3GAT1            |
| PRKCD             | Protein Kinase C $\delta$                                                                 | Protein coding    | 54 | GC03P053156 | 1.059619665 | https://www.genecards.org/cgi-bin/carddisp.pl?gene=PRKCD             |
| TRPS1             | Transcriptional Repressor GATA Binding 1                                                  | Protein coding    | 45 | GC08M115408 | 1.059348583 | https://www.genecards.org/cgi-bin/carddisp.pl?gene=TRPS1             |
| PDE6B             | Phosphodiesterase 6B                                                                      | Protein coding    | 46 | GC04P000587 | 1.059158444 | https://www.genecards.org/cgi-bin/carddisp.pl?gene=PDE6B             |
| TFG               | Trafficking From ER To Golgi Regulator                                                    | Protein coding    | 45 | GC03P100709 | 1.059158444 | https://www.genecards.org/cgi-bin/carddisp.pl?gene=TFG               |
| INA               | Intermexin Neuronal Intermediate Filament Protein $\alpha$                                | Protein coding    | 40 | GC10P103277 | 1.059158444 | https://www.genecards.org/cgi-bin/carddisp.pl?gene=INA               |
| LOC110596866      | CYP7A1 5' Regulatory Region                                                               | Biological region | 1  | GC08P058498 | 1.055786371 | https://www.genecards.org/cgi-bin/carddisp.pl?gene=LOC110596866      |
| LOC110599585      | CYP2E1 5' Regulatory Region                                                               | Biological region | 1  | GC10P133523 | 1.055786371 | https://www.genecards.org/cgi-bin/carddisp.pl?gene=LOC110599585      |
| MAPK11            | Mitogen-Activated Protein Kinase 11                                                       | Protein coding    | 47 | GC22M050263 | 1.055706859 | https://www.genecards.org/cgi-bin/carddisp.pl?gene=MAPK11            |
| CALU              | Calumenin                                                                                 | Protein coding    | 41 | GC07P128739 | 1.055038691 | https://www.genecards.org/cgi-bin/carddisp.pl?gene=CALU              |
| SCN3A             | Sodium Voltage-Gated Channel $\alpha$ Subunit 3                                           | Protein coding    | 47 | GC02M165087 | 1.054818273 | https://www.genecards.org/cgi-bin/carddisp.pl?gene=SCN3A             |
| HSD3B1            | Hydroxy- $\delta$ -5-Steroid Dehydrogenase, 3 $\beta$ - And Steroid $\delta$ -Isomerase 1 | Protein coding    | 44 | GC01P119507 | 1.054818273 | https://www.genecards.org/cgi-bin/carddisp.pl?gene=HSD3B1            |
| SLC4A5            | Solute Carrier Family 4 Member 5                                                          | Protein coding    | 42 | GC02M074217 | 1.054818273 | https://www.genecards.org/cgi-bin/carddisp.pl?gene=SLC4A5            |
| DUOX1             | Dual Oxidase 1                                                                            | Protein coding    | 41 | GC15P045129 | 1.054818273 | https://www.genecards.org/cgi-bin/carddisp.pl?gene=DUOX1             |
| SLC5A4            | Solute Carrier Family 5 Member 4                                                          | Protein coding    | 39 | GC22M032218 | 1.054818273 | https://www.genecards.org/cgi-bin/carddisp.pl?gene=SLC5A4            |
| AGTRAP            | Angiotensin II Receptor Associated Protein                                                | Protein coding    | 38 | GC01P011736 | 1.054818273 | https://www.genecards.org/cgi-bin/carddisp.pl?gene=AGTRAP            |
| ATG9B             | Autophagy Related 9B                                                                      | Protein coding    | 36 | GC07M151012 | 1.054818273 | https://www.genecards.org/cgi-bin/carddisp.pl?gene=ATG9B             |

|              |                                                                  |                |    |             |             |                                                                                                                                               |
|--------------|------------------------------------------------------------------|----------------|----|-------------|-------------|-----------------------------------------------------------------------------------------------------------------------------------------------|
| CYP4A22      | Cytochrome P450 Family 4 Subfamily A Member 22                   | Protein coding | 36 | GC01P047142 | 1.054818273 | <a href="https://www.genecards.org/cgi-bin/carddisp.pl?gene=CYP4A22">https://www.genecards.org/cgi-bin/carddisp.pl?gene=CYP4A22</a>           |
| HTN3         | Histatin 3                                                       | Protein coding | 34 | GC04P070028 | 1.054818273 | <a href="https://www.genecards.org/cgi-bin/carddisp.pl?gene=HTN3">https://www.genecards.org/cgi-bin/carddisp.pl?gene=HTN3</a>                 |
| SLC9B2       | Solute Carrier Family 9 Member B2                                | Protein coding | 34 | GC04M103019 | 1.054818273 | <a href="https://www.genecards.org/cgi-bin/carddisp.pl?gene=SLC9B2">https://www.genecards.org/cgi-bin/carddisp.pl?gene=SLC9B2</a>             |
| HTN1         | Histatin 1                                                       | Protein coding | 33 | GC04P070053 | 1.054818273 | <a href="https://www.genecards.org/cgi-bin/carddisp.pl?gene=HTN1">https://www.genecards.org/cgi-bin/carddisp.pl?gene=HTN1</a>                 |
| EMX2OS       | EMX2 Opposite Strand/Antisense RNA                               | RNA gene       | 20 | GC10M117473 | 1.054818273 | <a href="https://www.genecards.org/cgi-bin/carddisp.pl?gene=EMX2OS">https://www.genecards.org/cgi-bin/carddisp.pl?gene=EMX2OS</a>             |
| MIR505       | MicroRNA 505                                                     | RNA gene       | 17 | GC0XM139924 | 1.054818273 | <a href="https://www.genecards.org/cgi-bin/carddisp.pl?gene=MIR505">https://www.genecards.org/cgi-bin/carddisp.pl?gene=MIR505</a>             |
| MIR517A      | MicroRNA 517a                                                    | RNA gene       | 15 | GC19P053712 | 1.054818273 | <a href="https://www.genecards.org/cgi-bin/carddisp.pl?gene=MIR517A">https://www.genecards.org/cgi-bin/carddisp.pl?gene=MIR517A</a>           |
| LINC01227    | Long Intergenic Non-Protein Coding RNA 1227                      | RNA gene       | 13 | GC16M080566 | 1.054818273 | <a href="https://www.genecards.org/cgi-bin/carddisp.pl?gene=LINC01227">https://www.genecards.org/cgi-bin/carddisp.pl?gene=LINC01227</a>       |
| LOC105371049 | Uncharacterized LOC105371049                                     | RNA gene       | 9  | GC16P006191 | 1.054818273 | <a href="https://www.genecards.org/cgi-bin/carddisp.pl?gene=LOC105371049">https://www.genecards.org/cgi-bin/carddisp.pl?gene=LOC105371049</a> |
| ITGA1        | Integrin Subunit $\alpha$ 1                                      | Protein coding | 42 | GC05P052788 | 1.053532362 | <a href="https://www.genecards.org/cgi-bin/carddisp.pl?gene=ITGA1">https://www.genecards.org/cgi-bin/carddisp.pl?gene=ITGA1</a>               |
| PLCL2        | Phospholipase C Like 2                                           | Protein coding | 38 | GC03P016803 | 1.05313623  | <a href="https://www.genecards.org/cgi-bin/carddisp.pl?gene=PLCL2">https://www.genecards.org/cgi-bin/carddisp.pl?gene=PLCL2</a>               |
| TIMP4        | TIMP Metallopeptidase Inhibitor 4                                | Protein coding | 40 | GC03M012153 | 1.051713228 | <a href="https://www.genecards.org/cgi-bin/carddisp.pl?gene=TIMP4">https://www.genecards.org/cgi-bin/carddisp.pl?gene=TIMP4</a>               |
| EYA1         | EYA Transcriptional Coactivator And Phosphatase 1                | Protein coding | 45 | GC08M071210 | 1.050078869 | <a href="https://www.genecards.org/cgi-bin/carddisp.pl?gene=EYA1">https://www.genecards.org/cgi-bin/carddisp.pl?gene=EYA1</a>                 |
| STMN2        | Stathmin 2                                                       | Protein coding | 39 | GC08P079610 | 1.050078869 | <a href="https://www.genecards.org/cgi-bin/carddisp.pl?gene=STMN2">https://www.genecards.org/cgi-bin/carddisp.pl?gene=STMN2</a>               |
| INO80        | INO80 Complex ATPase Subunit                                     | Protein coding | 36 | GC15M040979 | 1.046738386 | <a href="https://www.genecards.org/cgi-bin/carddisp.pl?gene=INO80">https://www.genecards.org/cgi-bin/carddisp.pl?gene=INO80</a>               |
| LOXL1        | Lysyl Oxidase Like 1                                             | Protein coding | 43 | GC15P073925 | 1.042695761 | <a href="https://www.genecards.org/cgi-bin/carddisp.pl?gene=LOXL1">https://www.genecards.org/cgi-bin/carddisp.pl?gene=LOXL1</a>               |
| DLK1         | $\delta$ Like Non-Canonical Notch Ligand 1                       | Protein coding | 44 | GC14P106593 | 1.041279078 | <a href="https://www.genecards.org/cgi-bin/carddisp.pl?gene=DLK1">https://www.genecards.org/cgi-bin/carddisp.pl?gene=DLK1</a>                 |
| TNKS2        | Tankyrase 2                                                      | Protein coding | 44 | GC10P091798 | 1.04084599  | <a href="https://www.genecards.org/cgi-bin/carddisp.pl?gene=TNKS2">https://www.genecards.org/cgi-bin/carddisp.pl?gene=TNKS2</a>               |
| REL          | REL Proto-Oncogene, NF-KB Subunit                                | Protein coding | 46 | GC02P060881 | 1.038821578 | <a href="https://www.genecards.org/cgi-bin/carddisp.pl?gene=REL">https://www.genecards.org/cgi-bin/carddisp.pl?gene=REL</a>                   |
| LRRC8A       | Leucine Rich Repeat Containing 8 VRAC Subunit A                  | Protein coding | 40 | GC09P128882 | 1.038116455 | <a href="https://www.genecards.org/cgi-bin/carddisp.pl?gene=LRRC8A">https://www.genecards.org/cgi-bin/carddisp.pl?gene=LRRC8A</a>             |
| PTPN6        | Protein Tyrosine Phosphatase Non-Receptor Type 6                 | Protein coding | 49 | GC12P013190 | 1.034561038 | <a href="https://www.genecards.org/cgi-bin/carddisp.pl?gene=PTPN6">https://www.genecards.org/cgi-bin/carddisp.pl?gene=PTPN6</a>               |
| SLC11A2      | Solute Carrier Family 11 Member 2                                | Protein coding | 47 | GC12M050952 | 1.032966375 | <a href="https://www.genecards.org/cgi-bin/carddisp.pl?gene=SLC11A2">https://www.genecards.org/cgi-bin/carddisp.pl?gene=SLC11A2</a>           |
| MUC16        | Mucin 16, Cell Surface Associated                                | Protein coding | 37 | GC19M008848 | 1.031075239 | <a href="https://www.genecards.org/cgi-bin/carddisp.pl?gene=MUC16">https://www.genecards.org/cgi-bin/carddisp.pl?gene=MUC16</a>               |
| ABCD1        | ATP Binding Cassette Subfamily D Member 1                        | Protein coding | 46 | GC0XP153724 | 1.03074789  | <a href="https://www.genecards.org/cgi-bin/carddisp.pl?gene=ABCD1">https://www.genecards.org/cgi-bin/carddisp.pl?gene=ABCD1</a>               |
| SPHK2        | Sphingosine Kinase 2                                             | Protein coding | 44 | GC19P048619 | 1.028167009 | <a href="https://www.genecards.org/cgi-bin/carddisp.pl?gene=SPHK2">https://www.genecards.org/cgi-bin/carddisp.pl?gene=SPHK2</a>               |
| PTH1R        | Parathyroid Hormone 1 Receptor                                   | Protein coding | 50 | GC03P046877 | 1.026613116 | <a href="https://www.genecards.org/cgi-bin/carddisp.pl?gene=PTH1R">https://www.genecards.org/cgi-bin/carddisp.pl?gene=PTH1R</a>               |
| PADI4        | Peptidyl Arginine Deiminase 4                                    | Protein coding | 43 | GC01P017308 | 1.026613116 | <a href="https://www.genecards.org/cgi-bin/carddisp.pl?gene=PADI4">https://www.genecards.org/cgi-bin/carddisp.pl?gene=PADI4</a>               |
| FGF4         | Fibroblast Growth Factor 4                                       | Protein coding | 43 | GC11M071947 | 1.025001526 | <a href="https://www.genecards.org/cgi-bin/carddisp.pl?gene=FGF4">https://www.genecards.org/cgi-bin/carddisp.pl?gene=FGF4</a>                 |
| SPARC        | Secreted Protein Acidic And Cysteine Rich                        | Protein coding | 50 | GC05M151661 | 1.02357626  | <a href="https://www.genecards.org/cgi-bin/carddisp.pl?gene=SPARC">https://www.genecards.org/cgi-bin/carddisp.pl?gene=SPARC</a>               |
| MAPK7        | Mitogen-Activated Protein Kinase 7                               | Protein coding | 48 | GC17P020247 | 1.023440242 | <a href="https://www.genecards.org/cgi-bin/carddisp.pl?gene=MAPK7">https://www.genecards.org/cgi-bin/carddisp.pl?gene=MAPK7</a>               |
| ATP7A        | ATPase Copper Transporting $\alpha$                              | Protein coding | 46 | GC0XP077948 | 1.023012877 | <a href="https://www.genecards.org/cgi-bin/carddisp.pl?gene=ATP7A">https://www.genecards.org/cgi-bin/carddisp.pl?gene=ATP7A</a>               |
| C5AR1        | Complement C5a Receptor 1                                        | Protein coding | 44 | GC19P047290 | 1.021420717 | <a href="https://www.genecards.org/cgi-bin/carddisp.pl?gene=C5AR1">https://www.genecards.org/cgi-bin/carddisp.pl?gene=C5AR1</a>               |
| NR1H2        | Nuclear Receptor Subfamily 1 Group H Member 2                    | Protein coding | 48 | GC19P050329 | 1.018903375 | <a href="https://www.genecards.org/cgi-bin/carddisp.pl?gene=NR1H2">https://www.genecards.org/cgi-bin/carddisp.pl?gene=NR1H2</a>               |
| CA1          | Carbonic Anhydrase 1                                             | Protein coding | 46 | GC08M085327 | 1.017064333 | <a href="https://www.genecards.org/cgi-bin/carddisp.pl?gene=CA1">https://www.genecards.org/cgi-bin/carddisp.pl?gene=CA1</a>                   |
| PRKD1        | Protein Kinase D1                                                | Protein coding | 50 | GC14M029576 | 1.016151428 | <a href="https://www.genecards.org/cgi-bin/carddisp.pl?gene=PRKD1">https://www.genecards.org/cgi-bin/carddisp.pl?gene=PRKD1</a>               |
| ACTN4        | Actinin $\alpha$ 4                                               | Protein coding | 47 | GC19P038647 | 1.013119936 | <a href="https://www.genecards.org/cgi-bin/carddisp.pl?gene=ACTN4">https://www.genecards.org/cgi-bin/carddisp.pl?gene=ACTN4</a>               |
| CSN1S1       | Casein $\alpha$ S1                                               | Protein coding | 34 | GC04P069932 | 1.012822747 | <a href="https://www.genecards.org/cgi-bin/carddisp.pl?gene=CSN1S1">https://www.genecards.org/cgi-bin/carddisp.pl?gene=CSN1S1</a>             |
| MIR374A      | MicroRNA 374a                                                    | RNA gene       | 16 | GC0XM074296 | 1.011798143 | <a href="https://www.genecards.org/cgi-bin/carddisp.pl?gene=MIR374A">https://www.genecards.org/cgi-bin/carddisp.pl?gene=MIR374A</a>           |
| TMLHE        | Trimethyllysine Hydroxylase, $\epsilon$                          | Protein coding | 43 | GC0XM155489 | 1.011706233 | <a href="https://www.genecards.org/cgi-bin/carddisp.pl?gene=TMLHE">https://www.genecards.org/cgi-bin/carddisp.pl?gene=TMLHE</a>               |
| TNFRSF25     | TNF Receptor Superfamily Member 25                               | Protein coding | 43 | GC01M006460 | 1.011026621 | <a href="https://www.genecards.org/cgi-bin/carddisp.pl?gene=TNFRSF25">https://www.genecards.org/cgi-bin/carddisp.pl?gene=TNFRSF25</a>         |
| HTR7         | 5-Hydroxytryptamine Receptor 7                                   | Protein coding | 47 | GC10M090740 | 1.006878614 | <a href="https://www.genecards.org/cgi-bin/carddisp.pl?gene=HTR7">https://www.genecards.org/cgi-bin/carddisp.pl?gene=HTR7</a>                 |
| E2F1         | E2F Transcription Factor 1                                       | Protein coding | 44 | GC20M033675 | 1.006452084 | <a href="https://www.genecards.org/cgi-bin/carddisp.pl?gene=E2F1">https://www.genecards.org/cgi-bin/carddisp.pl?gene=E2F1</a>                 |
| CXCL14       | C-X-C Motif Chemokine Ligand 14                                  | Protein coding | 38 | GC05M135617 | 1.003096342 | <a href="https://www.genecards.org/cgi-bin/carddisp.pl?gene=CXCL14">https://www.genecards.org/cgi-bin/carddisp.pl?gene=CXCL14</a>             |
| LGI1         | Leucine Rich Glioma Inactivated 1                                | Protein coding | 43 | GC10P093757 | 1.00259769  | <a href="https://www.genecards.org/cgi-bin/carddisp.pl?gene=LGI1">https://www.genecards.org/cgi-bin/carddisp.pl?gene=LGI1</a>                 |
| TCFL5        | Transcription Factor Like 5                                      | Protein coding | 36 | GC20M062841 | 1.00189662  | <a href="https://www.genecards.org/cgi-bin/carddisp.pl?gene=TCFL5">https://www.genecards.org/cgi-bin/carddisp.pl?gene=TCFL5</a>               |
| MIR215       | MicroRNA 215                                                     | RNA gene       | 19 | GC01M220117 | 1.001075983 | <a href="https://www.genecards.org/cgi-bin/carddisp.pl?gene=MIR215">https://www.genecards.org/cgi-bin/carddisp.pl?gene=MIR215</a>             |
| TRPM6        | Transient Receptor Potential Cation Channel Subfamily M Member 6 | Protein coding | 46 | GC09M074725 | 1.000572205 | <a href="https://www.genecards.org/cgi-bin/carddisp.pl?gene=TRPM6">https://www.genecards.org/cgi-bin/carddisp.pl?gene=TRPM6</a>               |
| ICAM3        | Intercellular Adhesion Molecule 3                                | Protein coding | 41 | GC19M010337 | 1.000572205 | <a href="https://www.genecards.org/cgi-bin/carddisp.pl?gene=ICAM3">https://www.genecards.org/cgi-bin/carddisp.pl?gene=ICAM3</a>               |
| MIR211       | MicroRNA 211                                                     | RNA gene       | 19 | GC15M031065 | 1.000572205 | <a href="https://www.genecards.org/cgi-bin/carddisp.pl?gene=MIR211">https://www.genecards.org/cgi-bin/carddisp.pl?gene=MIR211</a>             |
| SOS1         | SOS Ras/Rac Guanine Nucleotide Exchange Factor 1                 | Protein coding | 48 | GC02M038981 | 0.999275446 | <a href="https://www.genecards.org/cgi-bin/carddisp.pl?gene=SOS1">https://www.genecards.org/cgi-bin/carddisp.pl?gene=SOS1</a>                 |
| ECHS1        | Enoyl-CoA Hydratase, Short Chain 1                               | Protein coding | 47 | GC10M133362 | 0.999275446 | <a href="https://www.genecards.org/cgi-bin/carddisp.pl?gene=ECHS1">https://www.genecards.org/cgi-bin/carddisp.pl?gene=ECHS1</a>               |
| PC           | Pyruvate Carboxylase                                             | Protein coding | 47 | GC11M066848 | 0.999275446 | <a href="https://www.genecards.org/cgi-bin/carddisp.pl?gene=PC">https://www.genecards.org/cgi-bin/carddisp.pl?gene=PC</a>                     |
| GALNT3       | Polypeptide N-Acetylgalactosaminyltransferase 3                  | Protein coding | 45 | GC02M165747 | 0.999275446 | <a href="https://www.genecards.org/cgi-bin/carddisp.pl?gene=GALNT3">https://www.genecards.org/cgi-bin/carddisp.pl?gene=GALNT3</a>             |
| FAM20C       | FAM20C Golgi Associated Secretory Pathway Kinase                 | Protein coding | 41 | GC07P000192 | 0.999275446 | <a href="https://www.genecards.org/cgi-bin/carddisp.pl?gene=FAM20C">https://www.genecards.org/cgi-bin/carddisp.pl?gene=FAM20C</a>             |
| PHEX         | Phosphate Regulating Endopeptidase Homolog X-Linked              | Protein coding | 41 | GC0XP022032 | 0.999275446 | <a href="https://www.genecards.org/cgi-bin/carddisp.pl?gene=PHEX">https://www.genecards.org/cgi-bin/carddisp.pl?gene=PHEX</a>                 |
| SLC34A3      | Solute Carrier Family 34 Member 3                                | Protein coding | 41 | GC09P137230 | 0.999275446 | <a href="https://www.genecards.org/cgi-bin/carddisp.pl?gene=SLC34A3">https://www.genecards.org/cgi-bin/carddisp.pl?gene=SLC34A3</a>           |
| BMP10        | Bone Morphogenetic Protein 10                                    | Protein coding | 38 | GC02M068865 | 0.999275446 | <a href="https://www.genecards.org/cgi-bin/carddisp.pl?gene=BMP10">https://www.genecards.org/cgi-bin/carddisp.pl?gene=BMP10</a>               |
| MYBPC2       | Myosin Binding Protein C2                                        | Protein coding | 38 | GC19P050432 | 0.999275446 | <a href="https://www.genecards.org/cgi-bin/carddisp.pl?gene=MYBPC2">https://www.genecards.org/cgi-bin/carddisp.pl?gene=MYBPC2</a>             |
| PHOSPHO1     | Phosphoethanolamine/Phosphocholine Phosphatase 1                 | Protein coding | 37 | GC17M049223 | 0.999275446 | <a href="https://www.genecards.org/cgi-bin/carddisp.pl?gene=PHOSPHO1">https://www.genecards.org/cgi-bin/carddisp.pl?gene=PHOSPHO1</a>         |
| SLC2A11      | Solute Carrier Family 2 Member 11                                | Protein coding | 37 | GC22P023856 | 0.999275446 | <a href="https://www.genecards.org/cgi-bin/carddisp.pl?gene=SLC2A11">https://www.genecards.org/cgi-bin/carddisp.pl?gene=SLC2A11</a>           |
| MLN          | Motilin                                                          | Protein coding | 35 | GC06M033794 | 0.999275446 | <a href="https://www.genecards.org/cgi-bin/carddisp.pl?gene=MLN">https://www.genecards.org/cgi-bin/carddisp.pl?gene=MLN</a>                   |
| DUSP11       | Dual Specificity Phosphatase 11                                  | Protein coding | 34 | GC02M073762 | 0.999275446 | <a href="https://www.genecards.org/cgi-bin/carddisp.pl?gene=DUSP11">https://www.genecards.org/cgi-bin/carddisp.pl?gene=DUSP11</a>             |
| ARSJ         | Arylsulfatase Family Member J                                    | Protein coding | 34 | GC04M113901 | 0.999275446 | <a href="https://www.genecards.org/cgi-bin/carddisp.pl?gene=ARSJ">https://www.genecards.org/cgi-bin/carddisp.pl?gene=ARSJ</a>                 |
| OR2AG1       | Olfactory Receptor Family 2 Subfamily AG Member 1                | Protein coding | 34 | GC11P006784 | 0.999275446 | <a href="https://www.genecards.org/cgi-bin/carddisp.pl?gene=OR2AG1">https://www.genecards.org/cgi-bin/carddisp.pl?gene=OR2AG1</a>             |
| DMBX1        | Diencephalon/Mesencephalon Homeobox 1                            | Protein coding | 32 | GC01P046489 | 0.999275446 | <a href="https://www.genecards.org/cgi-bin/carddisp.pl?gene=DMBX1">https://www.genecards.org/cgi-bin/carddisp.pl?gene=DMBX1</a>               |
| CNOT11       | CCR4-NOT Transcription Complex Subunit 11                        | Protein coding | 29 | GC02P101252 | 0.999275446 | <a href="https://www.genecards.org/cgi-bin/carddisp.pl?gene=CNOT11">https://www.genecards.org/cgi-bin/carddisp.pl?gene=CNOT11</a>             |
| CFAP47       | Cilia And Flagella Associated Protein 47                         | Protein coding | 28 | GC0XP035919 | 0.999275446 | <a href="https://www.genecards.org/cgi-bin/carddisp.pl?gene=CFAP47">https://www.genecards.org/cgi-bin/carddisp.pl?gene=CFAP47</a>             |
| PVT1         | Pvt1 Oncogene                                                    | RNA gene       | 25 | GC08P127827 | 0.998605192 | <a href="https://www.genecards.org/cgi-bin/carddisp.pl?gene=PVT1">https://www.genecards.org/cgi-bin/carddisp.pl?gene=PVT1</a>                 |
| PDPK1        | 3-Phosphoinositide Dependent Protein Kinase 1                    | Protein coding | 49 | GC16P002537 | 0.994946361 | <a href="https://www.genecards.org/cgi-bin/carddisp.pl?gene=PDPK1">https://www.genecards.org/cgi-bin/carddisp.pl?gene=PDPK1</a>               |
| ILK          | Integrin Linked Kinase                                           | Protein coding | 47 | GC11P006604 | 0.994177401 | <a href="https://www.genecards.org/cgi-bin/carddisp.pl?gene=ILK">https://www.genecards.org/cgi-bin/carddisp.pl?gene=ILK</a>                   |
| UBE2G2       | Ubiquitin Conjugating Enzyme E2 G2                               | Protein coding | 44 | GC21M044768 | 0.993591189 | <a href="https://www.genecards.org/cgi-bin/carddisp.pl?gene=UBE2G2">https://www.genecards.org/cgi-bin/carddisp.pl?gene=UBE2G2</a>             |
| SLC12A5      | Solute Carrier Family 12 Member 5                                | Protein coding | 47 | GC20P046021 | 0.992959619 | <a href="https://www.genecards.org/cgi-bin/carddisp.pl?gene=SLC12A5">https://www.genecards.org/cgi-bin/carddisp.pl?gene=SLC12A5</a>           |
| PLN          | Phospholamban                                                    | Protein coding | 45 | GC06P118548 | 0.991301894 | <a href="https://www.genecards.org/cgi-bin/carddisp.pl?gene=PLN">https://www.genecards.org/cgi-bin/carddisp.pl?gene=PLN</a>                   |
| JAK1         | Janus Kinase 1                                                   | Protein coding | 53 | GC01M064833 | 0.991189897 | <a href="https://www.genecards.org/cgi-bin/carddisp.pl?gene=JAK1">https://www.genecards.org/cgi-bin/carddisp.pl?gene=JAK1</a>                 |
| MTF1         | Metal Regulatory Transcription Factor 1                          | Protein coding | 41 | GC01M037810 | 0.990514398 | <a href="https://www.genecards.org/cgi-bin/carddisp.pl?gene=MTF1">https://www.genecards.org/cgi-bin/carddisp.pl?gene=MTF1</a>                 |
| NCEH1        | Neutral Cholesterol Ester Hydrolase 1                            | Protein coding | 38 | GC03M172630 | 0.990514398 | <a href="https://www.genecards.org/cgi-bin/carddisp.pl?gene=NCEH1">https://www.genecards.org/cgi-bin/carddisp.pl?gene=NCEH1</a>               |

|          |                                                                                                   |                |    |             |             |                                                                                                                                       |
|----------|---------------------------------------------------------------------------------------------------|----------------|----|-------------|-------------|---------------------------------------------------------------------------------------------------------------------------------------|
| CPQ      | Carboxypeptidase Q                                                                                | Protein coding | 34 | GC08P096645 | 0.989202857 | <a href="https://www.genecards.org/cgi-bin/carddisp.pl?gene=CPQ">https://www.genecards.org/cgi-bin/carddisp.pl?gene=CPQ</a>           |
| CTSL     | Cathepsin L                                                                                       | Protein coding | 45 | GC09P087725 | 0.986578584 | <a href="https://www.genecards.org/cgi-bin/carddisp.pl?gene=CTSL">https://www.genecards.org/cgi-bin/carddisp.pl?gene=CTSL</a>         |
| C4BPA    | Complement Component 4 Binding Protein $\alpha$                                                   | Protein coding | 41 | GC01P207105 | 0.98567909  | <a href="https://www.genecards.org/cgi-bin/carddisp.pl?gene=C4BPA">https://www.genecards.org/cgi-bin/carddisp.pl?gene=C4BPA</a>       |
| SUMF1    | Sulfatase Modifying Factor 1                                                                      | Protein coding | 42 | GC03M003700 | 0.983193636 | <a href="https://www.genecards.org/cgi-bin/carddisp.pl?gene=SUMF1">https://www.genecards.org/cgi-bin/carddisp.pl?gene=SUMF1</a>       |
| PTGER2   | Prostaglandin E Receptor 2                                                                        | Protein coding | 48 | GC14P052314 | 0.982312441 | <a href="https://www.genecards.org/cgi-bin/carddisp.pl?gene=PTGER2">https://www.genecards.org/cgi-bin/carddisp.pl?gene=PTGER2</a>     |
| TRDMT1   | TRNA Aspartic Acid Methyltransferase 1                                                            | Protein coding | 39 | GC10M017138 | 0.980447114 | <a href="https://www.genecards.org/cgi-bin/carddisp.pl?gene=TRDMT1">https://www.genecards.org/cgi-bin/carddisp.pl?gene=TRDMT1</a>     |
| ADH1B    | Alcohol Dehydrogenase 1B (Class I), $\beta$ Polypeptide                                           | Protein coding | 44 | GC04M099304 | 0.979142368 | <a href="https://www.genecards.org/cgi-bin/carddisp.pl?gene=ADH1B">https://www.genecards.org/cgi-bin/carddisp.pl?gene=ADH1B</a>       |
| MIR18A   | MicroRNA 18a                                                                                      | RNA gene       | 19 | GC13P091475 | 0.976626396 | <a href="https://www.genecards.org/cgi-bin/carddisp.pl?gene=MIR18A">https://www.genecards.org/cgi-bin/carddisp.pl?gene=MIR18A</a>     |
| HSPA14   | Heat Shock Protein Family A (Hsp70) Member 14                                                     | Protein coding | 39 | GC10P014847 | 0.976171494 | <a href="https://www.genecards.org/cgi-bin/carddisp.pl?gene=HSPA14">https://www.genecards.org/cgi-bin/carddisp.pl?gene=HSPA14</a>     |
| AKAP7    | A-Kinase Anchoring Protein 7                                                                      | Protein coding | 38 | GC06P131126 | 0.971988618 | <a href="https://www.genecards.org/cgi-bin/carddisp.pl?gene=AKAP7">https://www.genecards.org/cgi-bin/carddisp.pl?gene=AKAP7</a>       |
| CTSG     | Cathepsin G                                                                                       | Protein coding | 45 | GC14M024573 | 0.967474878 | <a href="https://www.genecards.org/cgi-bin/carddisp.pl?gene=CTSG">https://www.genecards.org/cgi-bin/carddisp.pl?gene=CTSG</a>         |
| WRAP53   | WD Repeat Containing Antisense To TP53                                                            | Protein coding | 41 | GC17P009346 | 0.966851771 | <a href="https://www.genecards.org/cgi-bin/carddisp.pl?gene=WRAP53">https://www.genecards.org/cgi-bin/carddisp.pl?gene=WRAP53</a>     |
| DRD5     | Dopamine Receptor D5                                                                              | Protein coding | 48 | GC04P009783 | 0.965883255 | <a href="https://www.genecards.org/cgi-bin/carddisp.pl?gene=DRD5">https://www.genecards.org/cgi-bin/carddisp.pl?gene=DRD5</a>         |
| SV2A     | Synaptic Vesicle Glycoprotein 2A                                                                  | Protein coding | 44 | GC01M149903 | 0.965883255 | <a href="https://www.genecards.org/cgi-bin/carddisp.pl?gene=SV2A">https://www.genecards.org/cgi-bin/carddisp.pl?gene=SV2A</a>         |
| NTRK3    | Neurotrophic Receptor Tyrosine Kinase 3                                                           | Protein coding | 51 | GC15M087859 | 0.965340555 | <a href="https://www.genecards.org/cgi-bin/carddisp.pl?gene=NTRK3">https://www.genecards.org/cgi-bin/carddisp.pl?gene=NTRK3</a>       |
| PLD2     | Phospholipase D2                                                                                  | Protein coding | 48 | GC17P004808 | 0.964622319 | <a href="https://www.genecards.org/cgi-bin/carddisp.pl?gene=PLD2">https://www.genecards.org/cgi-bin/carddisp.pl?gene=PLD2</a>         |
| BLZF1    | Basic Leucine Zipper Nuclear Factor 1                                                             | Protein coding | 39 | GC01P169367 | 0.963870347 | <a href="https://www.genecards.org/cgi-bin/carddisp.pl?gene=BLZF1">https://www.genecards.org/cgi-bin/carddisp.pl?gene=BLZF1</a>       |
| DSTYK    | Dual Serine/Threonine And Tyrosine Protein Kinase                                                 | Protein coding | 41 | GC01M205111 | 0.963275313 | <a href="https://www.genecards.org/cgi-bin/carddisp.pl?gene=DSTYK">https://www.genecards.org/cgi-bin/carddisp.pl?gene=DSTYK</a>       |
| C1QTNF3  | C1q And TNF Related 3                                                                             | Protein coding | 37 | GC05M034017 | 0.960164249 | <a href="https://www.genecards.org/cgi-bin/carddisp.pl?gene=C1QTNF3">https://www.genecards.org/cgi-bin/carddisp.pl?gene=C1QTNF3</a>   |
| ARF1     | ADP Ribosylation Factor 1                                                                         | Protein coding | 47 | GC01P228082 | 0.958800673 | <a href="https://www.genecards.org/cgi-bin/carddisp.pl?gene=ARF1">https://www.genecards.org/cgi-bin/carddisp.pl?gene=ARF1</a>         |
| FIS1     | Fission, Mitochondrial 1                                                                          | Protein coding | 38 | GC07M101239 | 0.955266356 | <a href="https://www.genecards.org/cgi-bin/carddisp.pl?gene=FIS1">https://www.genecards.org/cgi-bin/carddisp.pl?gene=FIS1</a>         |
| IFRD1    | Interferon Related Developmental Regulator 1                                                      | Protein coding | 40 | GC07P112422 | 0.953816295 | <a href="https://www.genecards.org/cgi-bin/carddisp.pl?gene=IFRD1">https://www.genecards.org/cgi-bin/carddisp.pl?gene=IFRD1</a>       |
| STIM2    | Stromal Interaction Molecule 2                                                                    | Protein coding | 39 | GC04P026859 | 0.953540504 | <a href="https://www.genecards.org/cgi-bin/carddisp.pl?gene=STIM2">https://www.genecards.org/cgi-bin/carddisp.pl?gene=STIM2</a>       |
| ZDHHC17  | Zinc Finger DHHC-Type Palmitoyltransferase 17                                                     | Protein coding | 38 | GC12P076763 | 0.95315659  | <a href="https://www.genecards.org/cgi-bin/carddisp.pl?gene=ZDHHC17">https://www.genecards.org/cgi-bin/carddisp.pl?gene=ZDHHC17</a>   |
| MTRNR2L8 | MT-RNR2 Like 8                                                                                    | Protein coding | 22 | GC11M010730 | 0.952785969 | <a href="https://www.genecards.org/cgi-bin/carddisp.pl?gene=MTRNR2L8">https://www.genecards.org/cgi-bin/carddisp.pl?gene=MTRNR2L8</a> |
| SLC12A4  | Solute Carrier Family 12 Member 4                                                                 | Protein coding | 45 | GC16M067958 | 0.952018023 | <a href="https://www.genecards.org/cgi-bin/carddisp.pl?gene=SLC12A4">https://www.genecards.org/cgi-bin/carddisp.pl?gene=SLC12A4</a>   |
| CD69     | CD69 Molecule                                                                                     | Protein coding | 40 | GC12M016305 | 0.951474428 | <a href="https://www.genecards.org/cgi-bin/carddisp.pl?gene=CD69">https://www.genecards.org/cgi-bin/carddisp.pl?gene=CD69</a>         |
| ITGAX    | Integrin Subunit $\alpha$ X                                                                       | Protein coding | 44 | GC16P033540 | 0.950012982 | <a href="https://www.genecards.org/cgi-bin/carddisp.pl?gene=ITGAX">https://www.genecards.org/cgi-bin/carddisp.pl?gene=ITGAX</a>       |
| FGFR2    | Fibroblast Growth Factor Receptor 2                                                               | Protein coding | 53 | GC10M121478 | 0.94748193  | <a href="https://www.genecards.org/cgi-bin/carddisp.pl?gene=FGFR2">https://www.genecards.org/cgi-bin/carddisp.pl?gene=FGFR2</a>       |
| VIPR1    | Vasoactive Intestinal Peptide Receptor 1                                                          | Protein coding | 46 | GC03P042490 | 0.947193503 | <a href="https://www.genecards.org/cgi-bin/carddisp.pl?gene=VIPR1">https://www.genecards.org/cgi-bin/carddisp.pl?gene=VIPR1</a>       |
| CYSLTR1  | Cysteinyl Leukotriene Receptor 1                                                                  | Protein coding | 43 | GC0XM078271 | 0.94678551  | <a href="https://www.genecards.org/cgi-bin/carddisp.pl?gene=CYSLTR1">https://www.genecards.org/cgi-bin/carddisp.pl?gene=CYSLTR1</a>   |
| PLA2G4A  | Phospholipase A2 Group IVA                                                                        | Protein coding | 49 | GC01P186798 | 0.9453969   | <a href="https://www.genecards.org/cgi-bin/carddisp.pl?gene=PLA2G4A">https://www.genecards.org/cgi-bin/carddisp.pl?gene=PLA2G4A</a>   |
| RNF214   | Ring Finger Protein 214                                                                           | Protein coding | 33 | GC11P117232 | 0.943842053 | <a href="https://www.genecards.org/cgi-bin/carddisp.pl?gene=RNF214">https://www.genecards.org/cgi-bin/carddisp.pl?gene=RNF214</a>     |
| MSBP1    | Minisatellite Binding Protein 1                                                                   | Protein coding | 5  | GC00U990213 | 0.943456173 | <a href="https://www.genecards.org/cgi-bin/carddisp.pl?gene=MSBP1">https://www.genecards.org/cgi-bin/carddisp.pl?gene=MSBP1</a>       |
| TRPM4    | Transient Receptor Potential Cation Channel Subfamily M Member 4                                  | Protein coding | 45 | GC19P049157 | 0.942467749 | <a href="https://www.genecards.org/cgi-bin/carddisp.pl?gene=TRPM4">https://www.genecards.org/cgi-bin/carddisp.pl?gene=TRPM4</a>       |
| SLC1A6   | Solute Carrier Family 1 Member 6                                                                  | Protein coding | 44 | GC19M014921 | 0.941607416 | <a href="https://www.genecards.org/cgi-bin/carddisp.pl?gene=SLC1A6">https://www.genecards.org/cgi-bin/carddisp.pl?gene=SLC1A6</a>     |
| TIAL1    | TIA1 Cytotoxic Granule Associated RNA Binding Protein Like 1                                      | Protein coding | 40 | GC10M119571 | 0.941607416 | <a href="https://www.genecards.org/cgi-bin/carddisp.pl?gene=TIAL1">https://www.genecards.org/cgi-bin/carddisp.pl?gene=TIAL1</a>       |
| NRAS     | NRAS Proto-Oncogene, GTPase                                                                       | Protein coding | 48 | GC01M114704 | 0.941448212 | <a href="https://www.genecards.org/cgi-bin/carddisp.pl?gene=NRAS">https://www.genecards.org/cgi-bin/carddisp.pl?gene=NRAS</a>         |
| SMARCA1  | SWI/SNF Related, Matrix Associated, Actin Dependent Regulator Of Chromatin, Subfamily A, Member 1 | Protein coding | 39 | GC0XM129447 | 0.941448212 | <a href="https://www.genecards.org/cgi-bin/carddisp.pl?gene=SMARCA1">https://www.genecards.org/cgi-bin/carddisp.pl?gene=SMARCA1</a>   |
| MIR6501  | MicroRNA 6501                                                                                     | RNA gene       | 9  | GC21P033550 | 0.941448212 | <a href="https://www.genecards.org/cgi-bin/carddisp.pl?gene=MIR6501">https://www.genecards.org/cgi-bin/carddisp.pl?gene=MIR6501</a>   |
| MIR361   | MicroRNA 361                                                                                      | RNA gene       | 17 | GC0XM085903 | 0.941043973 | <a href="https://www.genecards.org/cgi-bin/carddisp.pl?gene=MIR361">https://www.genecards.org/cgi-bin/carddisp.pl?gene=MIR361</a>     |
| MPP1     | Membrane Palmitoylated Protein 1                                                                  | Protein coding | 40 | GC0XM154779 | 0.940216303 | <a href="https://www.genecards.org/cgi-bin/carddisp.pl?gene=MPP1">https://www.genecards.org/cgi-bin/carddisp.pl?gene=MPP1</a>         |
| FOXC1    | Forkhead Box C1                                                                                   | Protein coding | 43 | GC06P001610 | 0.938534439 | <a href="https://www.genecards.org/cgi-bin/carddisp.pl?gene=FOXC1">https://www.genecards.org/cgi-bin/carddisp.pl?gene=FOXC1</a>       |
| CFB      | Complement Factor B                                                                               | Protein coding | 45 | GC06P031945 | 0.938463807 | <a href="https://www.genecards.org/cgi-bin/carddisp.pl?gene=CFB">https://www.genecards.org/cgi-bin/carddisp.pl?gene=CFB</a>           |
| OLIG2    | Oligodendrocyte Transcription Factor 2                                                            | Protein coding | 40 | GC21P033025 | 0.935528636 | <a href="https://www.genecards.org/cgi-bin/carddisp.pl?gene=OLIG2">https://www.genecards.org/cgi-bin/carddisp.pl?gene=OLIG2</a>       |
| MIR638   | MicroRNA 638                                                                                      | RNA gene       | 17 | GC19P010719 | 0.935528636 | <a href="https://www.genecards.org/cgi-bin/carddisp.pl?gene=MIR638">https://www.genecards.org/cgi-bin/carddisp.pl?gene=MIR638</a>     |
| LRRFIP1  | LRR Binding FLII Interacting Protein 1                                                            | Protein coding | 38 | GC02P237627 | 0.93426019  | <a href="https://www.genecards.org/cgi-bin/carddisp.pl?gene=LRRFIP1">https://www.genecards.org/cgi-bin/carddisp.pl?gene=LRRFIP1</a>   |
| GPHA2    | Glycoprotein Hormone Subunit $\alpha$ 2                                                           | Protein coding | 34 | GC11M071631 | 0.932365775 | <a href="https://www.genecards.org/cgi-bin/carddisp.pl?gene=GPHA2">https://www.genecards.org/cgi-bin/carddisp.pl?gene=GPHA2</a>       |
| TGFBI    | Transforming Growth Factor $\beta$ Induced                                                        | Protein coding | 45 | GC05P136027 | 0.931101501 | <a href="https://www.genecards.org/cgi-bin/carddisp.pl?gene=TGFBI">https://www.genecards.org/cgi-bin/carddisp.pl?gene=TGFBI</a>       |
| ACACA    | Acetyl-CoA Carboxylase $\alpha$                                                                   | Protein coding | 49 | GC17M037084 | 0.930260658 | <a href="https://www.genecards.org/cgi-bin/carddisp.pl?gene=ACACA">https://www.genecards.org/cgi-bin/carddisp.pl?gene=ACACA</a>       |
| UGGT2    | UDP-Glucose Glycoprotein Glucosyltransferase 2                                                    | Protein coding | 37 | GC13M095801 | 0.928238153 | <a href="https://www.genecards.org/cgi-bin/carddisp.pl?gene=UGGT2">https://www.genecards.org/cgi-bin/carddisp.pl?gene=UGGT2</a>       |
| EMC8     | ER Membrane Protein Complex Subunit 8                                                             | Protein coding | 33 | GC16M085771 | 0.928238153 | <a href="https://www.genecards.org/cgi-bin/carddisp.pl?gene=EMC8">https://www.genecards.org/cgi-bin/carddisp.pl?gene=EMC8</a>         |
| VOPP1    | VOPP1 WW Domain Binding Protein                                                                   | Protein coding | 31 | GC07M055434 | 0.928238153 | <a href="https://www.genecards.org/cgi-bin/carddisp.pl?gene=VOPP1">https://www.genecards.org/cgi-bin/carddisp.pl?gene=VOPP1</a>       |
| MARCHF10 | Membrane Associated Ring-CH-Type Finger 10                                                        | Protein coding | 26 | GC17M062704 | 0.928238153 | <a href="https://www.genecards.org/cgi-bin/carddisp.pl?gene=MARCHF10">https://www.genecards.org/cgi-bin/carddisp.pl?gene=MARCHF10</a> |
| TAF4A    | TAF4 Chemokine Like Family Member 4                                                               | Protein coding | 26 | GC03M068714 | 0.928238153 | <a href="https://www.genecards.org/cgi-bin/carddisp.pl?gene=TAF4A">https://www.genecards.org/cgi-bin/carddisp.pl?gene=TAF4A</a>       |
| SCARB2   | Scavenger Receptor Class B Member 2                                                               | Protein coding | 44 | GC04M076158 | 0.928136468 | <a href="https://www.genecards.org/cgi-bin/carddisp.pl?gene=SCARB2">https://www.genecards.org/cgi-bin/carddisp.pl?gene=SCARB2</a>     |
| EIF2AK3  | Eukaryotic Translation Initiation Factor 2 $\alpha$ Kinase 3                                      | Protein coding | 49 | GC02M088556 | 0.927611947 | <a href="https://www.genecards.org/cgi-bin/carddisp.pl?gene=EIF2AK3">https://www.genecards.org/cgi-bin/carddisp.pl?gene=EIF2AK3</a>   |
| CHRNA2   | Cholinergic Receptor Nicotinic $\beta$ 2 Subunit                                                  | Protein coding | 45 | GC01P154568 | 0.927611947 | <a href="https://www.genecards.org/cgi-bin/carddisp.pl?gene=CHRNA2">https://www.genecards.org/cgi-bin/carddisp.pl?gene=CHRNA2</a>     |
| FOXC2    | Forkhead Box C2                                                                                   | Protein coding | 44 | GC16P086572 | 0.923003137 | <a href="https://www.genecards.org/cgi-bin/carddisp.pl?gene=FOXC2">https://www.genecards.org/cgi-bin/carddisp.pl?gene=FOXC2</a>       |
| REFXANK  | Regulatory Factor X Associated Ankyrin Containing Protein                                         | Protein coding | 42 | GC19P019192 | 0.922392845 | <a href="https://www.genecards.org/cgi-bin/carddisp.pl?gene=REFXANK">https://www.genecards.org/cgi-bin/carddisp.pl?gene=REFXANK</a>   |
| PRKACA   | Protein Kinase CAMP-Activated Catalytic Subunit $\alpha$                                          | Protein coding | 51 | GC19M014169 | 0.920310199 | <a href="https://www.genecards.org/cgi-bin/carddisp.pl?gene=PRKACA">https://www.genecards.org/cgi-bin/carddisp.pl?gene=PRKACA</a>     |
| MYDGF    | Myeloid Derived Growth Factor                                                                     | Protein coding | 33 | GC19M004641 | 0.920310199 | <a href="https://www.genecards.org/cgi-bin/carddisp.pl?gene=MYDGF">https://www.genecards.org/cgi-bin/carddisp.pl?gene=MYDGF</a>       |
| GIP      | Gastric Inhibitory Polypeptide                                                                    | Protein coding | 38 | GC17M048958 | 0.919942081 | <a href="https://www.genecards.org/cgi-bin/carddisp.pl?gene=GIP">https://www.genecards.org/cgi-bin/carddisp.pl?gene=GIP</a>           |
| EGLN2    | Egl-9 Family Hypoxia Inducible Factor 2                                                           | Protein coding | 45 | GC19P041719 | 0.918146372 | <a href="https://www.genecards.org/cgi-bin/carddisp.pl?gene=EGLN2">https://www.genecards.org/cgi-bin/carddisp.pl?gene=EGLN2</a>       |
| PTPN3    | Protein Tyrosine Phosphatase Non-Receptor Type 3                                                  | Protein coding | 44 | GC09M109375 | 0.9172014   | <a href="https://www.genecards.org/cgi-bin/carddisp.pl?gene=PTPN3">https://www.genecards.org/cgi-bin/carddisp.pl?gene=PTPN3</a>       |
| MS       | Multiple Sclerosis                                                                                | Genetic locus  | 4  | GC00U990205 | 0.9172014   | <a href="https://www.genecards.org/cgi-bin/carddisp.pl?gene=MS">https://www.genecards.org/cgi-bin/carddisp.pl?gene=MS</a>             |
| DCDC2    | Doublecortin Domain Containing 2                                                                  | Protein coding | 39 | GC06M024171 | 0.916721582 | <a href="https://www.genecards.org/cgi-bin/carddisp.pl?gene=DCDC2">https://www.genecards.org/cgi-bin/carddisp.pl?gene=DCDC2</a>       |
| HTR1D    | 5-Hydroxytryptamine Receptor 1D                                                                   | Protein coding | 46 | GC01M023191 | 0.915794075 | <a href="https://www.genecards.org/cgi-bin/carddisp.pl?gene=HTR1D">https://www.genecards.org/cgi-bin/carddisp.pl?gene=HTR1D</a>       |
| TPM3     | Tropomyosin 3                                                                                     | Protein coding | 46 | GC01M154127 | 0.915794075 | <a href="https://www.genecards.org/cgi-bin/carddisp.pl?gene=TPM3">https://www.genecards.org/cgi-bin/carddisp.pl?gene=TPM3</a>         |
| NCS1     | Neuronal Calcium Sensor 1                                                                         | Protein coding | 41 | GC09P130172 | 0.915794075 | <a href="https://www.genecards.org/cgi-bin/carddisp.pl?gene=NCS1">https://www.genecards.org/cgi-bin/carddisp.pl?gene=NCS1</a>         |
| TNFSF9   | TNF Superfamily Member 9                                                                          | Protein coding | 37 | GC19P006531 | 0.913768649 | <a href="https://www.genecards.org/cgi-bin/carddisp.pl?gene=TNFSF9">https://www.genecards.org/cgi-bin/carddisp.pl?gene=TNFSF9</a>     |
| PRDX2    | Peroxisedoxin 2                                                                                   | Protein coding | 46 | GC19M012796 | 0.90981406  | <a href="https://www.genecards.org/cgi-bin/carddisp.pl?gene=PRDX2">https://www.genecards.org/cgi-bin/carddisp.pl?gene=PRDX2</a>       |
| NTF4     | Neurotrophin 4                                                                                    | Protein coding | 43 | GC19M049605 | 0.908782363 | <a href="https://www.genecards.org/cgi-bin/carddisp.pl?gene=NTF4">https://www.genecards.org/cgi-bin/carddisp.pl?gene=NTF4</a>         |
| LPIN1    | Lipin 1                                                                                           | Protein coding | 48 | GC02P011677 | 0.905126691 | <a href="https://www.genecards.org/cgi-bin/carddisp.pl?gene=LPIN1">https://www.genecards.org/cgi-bin/carddisp.pl?gene=LPIN1</a>       |
| KLK15    | Kallikrein Related Peptidase 15                                                                   | Protein coding | 41 | GC19M050825 | 0.905077338 | <a href="https://www.genecards.org/cgi-bin/carddisp.pl?gene=KLK15">https://www.genecards.org/cgi-bin/carddisp.pl?gene=KLK15</a>       |

|          |                                                                                      |                |    |             |             |                                                                                                                                       |
|----------|--------------------------------------------------------------------------------------|----------------|----|-------------|-------------|---------------------------------------------------------------------------------------------------------------------------------------|
| VEGFD    | Vascular Endothelial Growth Factor D                                                 | Protein coding | 33 | GC0XM015345 | 0.90504384  | <a href="https://www.genecards.org/cgi-bin/carddisp.pl?gene=VEGFD">https://www.genecards.org/cgi-bin/carddisp.pl?gene=VEGFD</a>       |
| MESP2    | Mesoderm Posterior BHLH Transcription Factor 2                                       | Protein coding | 35 | GC15P089770 | 0.904410362 | <a href="https://www.genecards.org/cgi-bin/carddisp.pl?gene=MESP2">https://www.genecards.org/cgi-bin/carddisp.pl?gene=MESP2</a>       |
| ELOB     | Elongin B                                                                            | Protein coding | 33 | GC16M003901 | 0.90040642  | <a href="https://www.genecards.org/cgi-bin/carddisp.pl?gene=ELOB">https://www.genecards.org/cgi-bin/carddisp.pl?gene=ELOB</a>         |
| CD226    | CD226 Molecule                                                                       | Protein coding | 43 | GC18M069831 | 0.898628473 | <a href="https://www.genecards.org/cgi-bin/carddisp.pl?gene=CD226">https://www.genecards.org/cgi-bin/carddisp.pl?gene=CD226</a>       |
| NEU1     | Neuraminidase 1                                                                      | Protein coding | 44 | GC06M031857 | 0.898057342 | <a href="https://www.genecards.org/cgi-bin/carddisp.pl?gene=NEU1">https://www.genecards.org/cgi-bin/carddisp.pl?gene=NEU1</a>         |
| WNT1     | Wnt Family Member 1                                                                  | Protein coding | 45 | GC12P049053 | 0.895745397 | <a href="https://www.genecards.org/cgi-bin/carddisp.pl?gene=WNT1">https://www.genecards.org/cgi-bin/carddisp.pl?gene=WNT1</a>         |
| CCS      | Copper Chaperone For Superoxide Dismutase                                            | Protein coding | 43 | GC11P066593 | 0.895745397 | <a href="https://www.genecards.org/cgi-bin/carddisp.pl?gene=CCS">https://www.genecards.org/cgi-bin/carddisp.pl?gene=CCS</a>           |
| MICAL2   | Microtubule Associated Monooxygenase, Calponin And LIM Domain Containing 2           | Protein coding | 38 | GC11P012115 | 0.895112753 | <a href="https://www.genecards.org/cgi-bin/carddisp.pl?gene=MICAL2">https://www.genecards.org/cgi-bin/carddisp.pl?gene=MICAL2</a>     |
| KIR2DL1  | Killer Cell Immunoglobulin Like Receptor, Two Ig Domains And Long Cytoplasmic Tail 1 | Protein coding | 37 | GC19P056878 | 0.894890785 | <a href="https://www.genecards.org/cgi-bin/carddisp.pl?gene=KIR2DL1">https://www.genecards.org/cgi-bin/carddisp.pl?gene=KIR2DL1</a>   |
| A2M      | $\alpha$ -2-Macroglobulin                                                            | Protein coding | 45 | GC12M009067 | 0.894440114 | <a href="https://www.genecards.org/cgi-bin/carddisp.pl?gene=A2M">https://www.genecards.org/cgi-bin/carddisp.pl?gene=A2M</a>           |
| HAND2    | Heart And Neural Crest Derivatives Expressed 2                                       | Protein coding | 44 | GC04M173524 | 0.893392563 | <a href="https://www.genecards.org/cgi-bin/carddisp.pl?gene=HAND2">https://www.genecards.org/cgi-bin/carddisp.pl?gene=HAND2</a>       |
| NMT1     | N-Myristoyltransferase 1                                                             | Protein coding | 43 | GC17P045082 | 0.893392563 | <a href="https://www.genecards.org/cgi-bin/carddisp.pl?gene=NMT1">https://www.genecards.org/cgi-bin/carddisp.pl?gene=NMT1</a>         |
| SYT11    | Synaptotagmin 11                                                                     | Protein coding | 41 | GC01P155829 | 0.892251968 | <a href="https://www.genecards.org/cgi-bin/carddisp.pl?gene=SYT11">https://www.genecards.org/cgi-bin/carddisp.pl?gene=SYT11</a>       |
| FGF5     | Fibroblast Growth Factor 5                                                           | Protein coding | 44 | GC04P080266 | 0.891623259 | <a href="https://www.genecards.org/cgi-bin/carddisp.pl?gene=FGF5">https://www.genecards.org/cgi-bin/carddisp.pl?gene=FGF5</a>         |
| MIR410   | MicroRNA 410                                                                         | RNA gene       | 16 | GC14P106819 | 0.890509725 | <a href="https://www.genecards.org/cgi-bin/carddisp.pl?gene=MIR410">https://www.genecards.org/cgi-bin/carddisp.pl?gene=MIR410</a>     |
| MTDH     | Metadherin                                                                           | Protein coding | 40 | GC08P097643 | 0.884306967 | <a href="https://www.genecards.org/cgi-bin/carddisp.pl?gene=MTDH">https://www.genecards.org/cgi-bin/carddisp.pl?gene=MTDH</a>         |
| IFNAR1   | Interferon $\alpha$ And $\beta$ Receptor Subunit 1                                   | Protein coding | 45 | GC21P033324 | 0.872899234 | <a href="https://www.genecards.org/cgi-bin/carddisp.pl?gene=IFNAR1">https://www.genecards.org/cgi-bin/carddisp.pl?gene=IFNAR1</a>     |
| MIR186   | MicroRNA 186                                                                         | RNA gene       | 19 | GC01M071067 | 0.87239784  | <a href="https://www.genecards.org/cgi-bin/carddisp.pl?gene=MIR186">https://www.genecards.org/cgi-bin/carddisp.pl?gene=MIR186</a>     |
| HRH1     | Histamine Receptor H1                                                                | Protein coding | 45 | GC03P011163 | 0.871615708 | <a href="https://www.genecards.org/cgi-bin/carddisp.pl?gene=HRH1">https://www.genecards.org/cgi-bin/carddisp.pl?gene=HRH1</a>         |
| MDK      | Midkine                                                                              | Protein coding | 43 | GC11P046380 | 0.870167255 | <a href="https://www.genecards.org/cgi-bin/carddisp.pl?gene=MDK">https://www.genecards.org/cgi-bin/carddisp.pl?gene=MDK</a>           |
| MAP4K2   | Mitogen-Activated Protein Kinase Kinase Kinase Kinase 2                              | Protein coding | 47 | GC11M071615 | 0.869870722 | <a href="https://www.genecards.org/cgi-bin/carddisp.pl?gene=MAP4K2">https://www.genecards.org/cgi-bin/carddisp.pl?gene=MAP4K2</a>     |
| SDC4     | Syndecan 4                                                                           | Protein coding | 44 | GC20M045325 | 0.869079769 | <a href="https://www.genecards.org/cgi-bin/carddisp.pl?gene=SDC4">https://www.genecards.org/cgi-bin/carddisp.pl?gene=SDC4</a>         |
| CISD2    | CDGSH Iron Sulfur Domain 2                                                           | Protein coding | 41 | GC04P102868 | 0.86841023  | <a href="https://www.genecards.org/cgi-bin/carddisp.pl?gene=CISD2">https://www.genecards.org/cgi-bin/carddisp.pl?gene=CISD2</a>       |
| ELP1     | Elongator Acetyltransferase Complex Subunit 1                                        | Protein coding | 33 | GC09M108868 | 0.865249872 | <a href="https://www.genecards.org/cgi-bin/carddisp.pl?gene=ELP1">https://www.genecards.org/cgi-bin/carddisp.pl?gene=ELP1</a>         |
| IL6ST    | Interleukin 6 Cytokine Family Signal Transducer                                      | Protein coding | 47 | GC05M055935 | 0.863600194 | <a href="https://www.genecards.org/cgi-bin/carddisp.pl?gene=IL6ST">https://www.genecards.org/cgi-bin/carddisp.pl?gene=IL6ST</a>       |
| GPX4     | Glutathione Peroxidase 4                                                             | Protein coding | 47 | GC19P001103 | 0.862920284 | <a href="https://www.genecards.org/cgi-bin/carddisp.pl?gene=GPX4">https://www.genecards.org/cgi-bin/carddisp.pl?gene=GPX4</a>         |
| CYP46A1  | Cytochrome P450 Family 46 Subfamily A Member 1                                       | Protein coding | 41 | GC14P099684 | 0.862920284 | <a href="https://www.genecards.org/cgi-bin/carddisp.pl?gene=CYP46A1">https://www.genecards.org/cgi-bin/carddisp.pl?gene=CYP46A1</a>   |
| IL32     | Interleukin 32                                                                       | Protein coding | 39 | GC16P006225 | 0.862920284 | <a href="https://www.genecards.org/cgi-bin/carddisp.pl?gene=IL32">https://www.genecards.org/cgi-bin/carddisp.pl?gene=IL32</a>         |
| CDH2     | Cadherin 2                                                                           | Protein coding | 52 | GC18M027950 | 0.861933768 | <a href="https://www.genecards.org/cgi-bin/carddisp.pl?gene=CDH2">https://www.genecards.org/cgi-bin/carddisp.pl?gene=CDH2</a>         |
| QDPR     | Quinoid Dihydropteridine Reductase                                                   | Protein coding | 48 | GC04M017460 | 0.860933542 | <a href="https://www.genecards.org/cgi-bin/carddisp.pl?gene=QDPR">https://www.genecards.org/cgi-bin/carddisp.pl?gene=QDPR</a>         |
| CSNK1D   | Casein Kinase 1 $\delta$                                                             | Protein coding | 50 | GC17M082239 | 0.860389948 | <a href="https://www.genecards.org/cgi-bin/carddisp.pl?gene=CSNK1D">https://www.genecards.org/cgi-bin/carddisp.pl?gene=CSNK1D</a>     |
| KCNK9    | Potassium Two Pore Domain Channel Subfamily K Member 9                               | Protein coding | 47 | GC08M139585 | 0.860389948 | <a href="https://www.genecards.org/cgi-bin/carddisp.pl?gene=KCNK9">https://www.genecards.org/cgi-bin/carddisp.pl?gene=KCNK9</a>       |
| CACNA1E  | Calcium Voltage-Gated Channel Subunit $\alpha$ 1 E                                   | Protein coding | 46 | GC01P181317 | 0.860389948 | <a href="https://www.genecards.org/cgi-bin/carddisp.pl?gene=CACNA1E">https://www.genecards.org/cgi-bin/carddisp.pl?gene=CACNA1E</a>   |
| TRPV3    | Transient Receptor Potential Cation Channel Subfamily V Member 3                     | Protein coding | 44 | GC17M003515 | 0.860389948 | <a href="https://www.genecards.org/cgi-bin/carddisp.pl?gene=TRPV3">https://www.genecards.org/cgi-bin/carddisp.pl?gene=TRPV3</a>       |
| HTR1E    | 5-Hydroxytryptamine Receptor 1E                                                      | Protein coding | 41 | GC06P086937 | 0.860389948 | <a href="https://www.genecards.org/cgi-bin/carddisp.pl?gene=HTR1E">https://www.genecards.org/cgi-bin/carddisp.pl?gene=HTR1E</a>       |
| LAPTM4A  | Lysosomal Protein Transmembrane 4 $\alpha$                                           | Protein coding | 38 | GC02M020032 | 0.860389948 | <a href="https://www.genecards.org/cgi-bin/carddisp.pl?gene=LAPTM4A">https://www.genecards.org/cgi-bin/carddisp.pl?gene=LAPTM4A</a>   |
| KCNK18   | Potassium Two Pore Domain Channel Subfamily K Member 18                              | Protein coding | 38 | GC10P117197 | 0.860389948 | <a href="https://www.genecards.org/cgi-bin/carddisp.pl?gene=KCNK18">https://www.genecards.org/cgi-bin/carddisp.pl?gene=KCNK18</a>     |
| DCAF8    | DDB1 And CUL4 Associated Factor 8                                                    | Protein coding | 37 | GC01M160215 | 0.860389948 | <a href="https://www.genecards.org/cgi-bin/carddisp.pl?gene=DCAF8">https://www.genecards.org/cgi-bin/carddisp.pl?gene=DCAF8</a>       |
| SLC39A2  | Solute Carrier Family 39 Member 2                                                    | Protein coding | 36 | GC14P022332 | 0.860389948 | <a href="https://www.genecards.org/cgi-bin/carddisp.pl?gene=SLC39A2">https://www.genecards.org/cgi-bin/carddisp.pl?gene=SLC39A2</a>   |
| CDR1     | Cerebellar Degeneration Related Protein 1                                            | Protein coding | 31 | GC0XM140782 | 0.860389948 | <a href="https://www.genecards.org/cgi-bin/carddisp.pl?gene=CDR1">https://www.genecards.org/cgi-bin/carddisp.pl?gene=CDR1</a>         |
| MTRNR2L5 | MT-RNR2 Like 5                                                                       | Protein coding | 19 | GC10P055622 | 0.860389948 | <a href="https://www.genecards.org/cgi-bin/carddisp.pl?gene=MTRNR2L5">https://www.genecards.org/cgi-bin/carddisp.pl?gene=MTRNR2L5</a> |
| GIPR     | Gastric Inhibitory Polypeptide Receptor                                              | Protein coding | 44 | GC19P045668 | 0.857055545 | <a href="https://www.genecards.org/cgi-bin/carddisp.pl?gene=GIPR">https://www.genecards.org/cgi-bin/carddisp.pl?gene=GIPR</a>         |
| SENP3    | SUMO Specific Peptidase 3                                                            | Protein coding | 40 | GC17P009338 | 0.856902122 | <a href="https://www.genecards.org/cgi-bin/carddisp.pl?gene=SENP3">https://www.genecards.org/cgi-bin/carddisp.pl?gene=SENP3</a>       |
| PEPD     | Peptidase D                                                                          | Protein coding | 45 | GC19M033386 | 0.854803801 | <a href="https://www.genecards.org/cgi-bin/carddisp.pl?gene=PEPD">https://www.genecards.org/cgi-bin/carddisp.pl?gene=PEPD</a>         |
| PIK3R1   | Phosphoinositide-3-Kinase Regulatory Subunit 1                                       | Protein coding | 51 | GC05P068215 | 0.852586389 | <a href="https://www.genecards.org/cgi-bin/carddisp.pl?gene=PIK3R1">https://www.genecards.org/cgi-bin/carddisp.pl?gene=PIK3R1</a>     |
| HDAC1    | Histone Deacetylase 1                                                                | Protein coding | 49 | GC01P032292 | 0.851660192 | <a href="https://www.genecards.org/cgi-bin/carddisp.pl?gene=HDAC1">https://www.genecards.org/cgi-bin/carddisp.pl?gene=HDAC1</a>       |
| EGLN3    | Egl-9 Family Hypoxia Inducible Factor 3                                              | Protein coding | 46 | GC14M033924 | 0.851660192 | <a href="https://www.genecards.org/cgi-bin/carddisp.pl?gene=EGLN3">https://www.genecards.org/cgi-bin/carddisp.pl?gene=EGLN3</a>       |
| HLX      | H2.0 Like Homeobox                                                                   | Protein coding | 40 | GC01P220879 | 0.851383209 | <a href="https://www.genecards.org/cgi-bin/carddisp.pl?gene=HLX">https://www.genecards.org/cgi-bin/carddisp.pl?gene=HLX</a>           |
| RNF144B  | Ring Finger Protein 144B                                                             | Protein coding | 38 | GC06P018459 | 0.851383209 | <a href="https://www.genecards.org/cgi-bin/carddisp.pl?gene=RNF144B">https://www.genecards.org/cgi-bin/carddisp.pl?gene=RNF144B</a>   |
| SOX2     | SRY-Box Transcription Factor 2                                                       | Protein coding | 47 | GC03P181711 | 0.851225734 | <a href="https://www.genecards.org/cgi-bin/carddisp.pl?gene=SOX2">https://www.genecards.org/cgi-bin/carddisp.pl?gene=SOX2</a>         |
| IMPA1    | Inositol Monophosphatase 1                                                           | Protein coding | 48 | GC08M081656 | 0.850522935 | <a href="https://www.genecards.org/cgi-bin/carddisp.pl?gene=IMPA1">https://www.genecards.org/cgi-bin/carddisp.pl?gene=IMPA1</a>       |
| CEBPB    | CCAAT Enhancer Binding Protein $\beta$                                               | Protein coding | 44 | GC20P050190 | 0.84999299  | <a href="https://www.genecards.org/cgi-bin/carddisp.pl?gene=CEBPB">https://www.genecards.org/cgi-bin/carddisp.pl?gene=CEBPB</a>       |
| S1PR2    | Sphingosine-1-Phosphate Receptor 2                                                   | Protein coding | 45 | GC19M010223 | 0.847933412 | <a href="https://www.genecards.org/cgi-bin/carddisp.pl?gene=S1PR2">https://www.genecards.org/cgi-bin/carddisp.pl?gene=S1PR2</a>       |
| PPP3R1   | Protein Phosphatase 3 Regulatory Subunit B, $\alpha$                                 | Protein coding | 45 | GC02M068143 | 0.846242011 | <a href="https://www.genecards.org/cgi-bin/carddisp.pl?gene=PPP3R1">https://www.genecards.org/cgi-bin/carddisp.pl?gene=PPP3R1</a>     |
| GBE1     | 1,4- $\alpha$ -Glucan Branching Enzyme 1                                             | Protein coding | 44 | GC03M081489 | 0.845712066 | <a href="https://www.genecards.org/cgi-bin/carddisp.pl?gene=GBE1">https://www.genecards.org/cgi-bin/carddisp.pl?gene=GBE1</a>         |
| KCNH2    | Potassium Voltage-Gated Channel Subfamily H Member 2                                 | Protein coding | 50 | GC07M150944 | 0.844057322 | <a href="https://www.genecards.org/cgi-bin/carddisp.pl?gene=KCNH2">https://www.genecards.org/cgi-bin/carddisp.pl?gene=KCNH2</a>       |
| OCN      | Occludin                                                                             | Protein coding | 44 | GC05P069492 | 0.843857586 | <a href="https://www.genecards.org/cgi-bin/carddisp.pl?gene=OCN">https://www.genecards.org/cgi-bin/carddisp.pl?gene=OCN</a>           |
| CSK      | C-Terminal Src Kinase                                                                | Protein coding | 47 | GC15P074782 | 0.841490388 | <a href="https://www.genecards.org/cgi-bin/carddisp.pl?gene=CSK">https://www.genecards.org/cgi-bin/carddisp.pl?gene=CSK</a>           |
| ADCY1    | Adenylate Cyclase 1                                                                  | Protein coding | 48 | GC07P045580 | 0.839858472 | <a href="https://www.genecards.org/cgi-bin/carddisp.pl?gene=ADCY1">https://www.genecards.org/cgi-bin/carddisp.pl?gene=ADCY1</a>       |
| SLC45A2  | Solute Carrier Family 45 Member 2                                                    | Protein coding | 39 | GC05M033944 | 0.838562846 | <a href="https://www.genecards.org/cgi-bin/carddisp.pl?gene=SLC45A2">https://www.genecards.org/cgi-bin/carddisp.pl?gene=SLC45A2</a>   |
| ZRANB3   | Zinc Finger RANBP2-Type Containing 3                                                 | Protein coding | 36 | GC02M135136 | 0.838562846 | <a href="https://www.genecards.org/cgi-bin/carddisp.pl?gene=ZRANB3">https://www.genecards.org/cgi-bin/carddisp.pl?gene=ZRANB3</a>     |
| IL7R     | Interleukin 7 Receptor                                                               | Protein coding | 46 | GC05P035852 | 0.835170805 | <a href="https://www.genecards.org/cgi-bin/carddisp.pl?gene=IL7R">https://www.genecards.org/cgi-bin/carddisp.pl?gene=IL7R</a>         |
| CASQ2    | Calsequestrin 2                                                                      | Protein coding | 44 | GC01M115700 | 0.835170805 | <a href="https://www.genecards.org/cgi-bin/carddisp.pl?gene=CASQ2">https://www.genecards.org/cgi-bin/carddisp.pl?gene=CASQ2</a>       |
| SPI1     | Spi-1 Proto-Oncogene                                                                 | Protein coding | 43 | GC11M071235 | 0.833887279 | <a href="https://www.genecards.org/cgi-bin/carddisp.pl?gene=SPI1">https://www.genecards.org/cgi-bin/carddisp.pl?gene=SPI1</a>         |
| PSMB8    | Proteasome 20S Subunit $\beta$ 8                                                     | Protein coding | 50 | GC06M032840 | 0.833503544 | <a href="https://www.genecards.org/cgi-bin/carddisp.pl?gene=PSMB8">https://www.genecards.org/cgi-bin/carddisp.pl?gene=PSMB8</a>       |
| YY1      | YY1 Transcription Factor                                                             | Protein coding | 47 | GC14P100238 | 0.833503544 | <a href="https://www.genecards.org/cgi-bin/carddisp.pl?gene=YY1">https://www.genecards.org/cgi-bin/carddisp.pl?gene=YY1</a>           |
| MIR28    | MicroRNA 28                                                                          | RNA gene       | 19 | GC03P188688 | 0.833503544 | <a href="https://www.genecards.org/cgi-bin/carddisp.pl?gene=MIR28">https://www.genecards.org/cgi-bin/carddisp.pl?gene=MIR28</a>       |
| PTPA     | Protein Phosphatase 2 Phosphatase Activator                                          | Protein coding | 35 | GC09P129111 | 0.832853019 | <a href="https://www.genecards.org/cgi-bin/carddisp.pl?gene=PTPA">https://www.genecards.org/cgi-bin/carddisp.pl?gene=PTPA</a>         |
| GJD2     | Gap Junction Protein $\delta$ 2                                                      | Protein coding | 42 | GC15M034751 | 0.830397785 | <a href="https://www.genecards.org/cgi-bin/carddisp.pl?gene=GJD2">https://www.genecards.org/cgi-bin/carddisp.pl?gene=GJD2</a>         |
| APRT     | Adenine Phosphoribosyltransferase                                                    | Protein coding | 47 | GC16M088810 | 0.829987705 | <a href="https://www.genecards.org/cgi-bin/carddisp.pl?gene=APRT">https://www.genecards.org/cgi-bin/carddisp.pl?gene=APRT</a>         |
| ACVR2A   | Activin A Receptor Type 2A                                                           | Protein coding | 45 | GC02P147844 | 0.829466105 | <a href="https://www.genecards.org/cgi-bin/carddisp.pl?gene=ACVR2A">https://www.genecards.org/cgi-bin/carddisp.pl?gene=ACVR2A</a>     |
| SCFD1    | Sec1 Family Domain Containing 1                                                      | Protein coding | 38 | GC14P030622 | 0.822983027 | <a href="https://www.genecards.org/cgi-bin/carddisp.pl?gene=SCFD1">https://www.genecards.org/cgi-bin/carddisp.pl?gene=SCFD1</a>       |
| CHRNA5   | Cholinergic Receptor Nicotinic $\alpha$ 5 Subunit                                    | Protein coding | 44 | GC15P078565 | 0.817272305 | <a href="https://www.genecards.org/cgi-bin/carddisp.pl?gene=CHRNA5">https://www.genecards.org/cgi-bin/carddisp.pl?gene=CHRNA5</a>     |
| EZR      | Ezrin                                                                                | Protein coding | 45 | GC06M158765 | 0.815217376 | <a href="https://www.genecards.org/cgi-bin/carddisp.pl?gene=EZR">https://www.genecards.org/cgi-bin/carddisp.pl?gene=EZR</a>           |
| FCGR1A   | Fc Fragment Of IgG Receptor 1a                                                       | Protein coding | 41 | GC01P149754 | 0.813992798 | <a href="https://www.genecards.org/cgi-bin/carddisp.pl?gene=FCGR1A">https://www.genecards.org/cgi-bin/carddisp.pl?gene=FCGR1A</a>     |
| TAAR1    | Trace Amine Associated Receptor 1                                                    | Protein coding | 38 | GC06M132644 | 0.813992798 | <a href="https://www.genecards.org/cgi-bin/carddisp.pl?gene=TAAR1">https://www.genecards.org/cgi-bin/carddisp.pl?gene=TAAR1</a>       |

|            |                                                                          |                |    |             |             |                                                                                                                                           |
|------------|--------------------------------------------------------------------------|----------------|----|-------------|-------------|-------------------------------------------------------------------------------------------------------------------------------------------|
| E2F3       | E2F Transcription Factor 3                                               | Protein coding | 43 | GC06P020402 | 0.811397851 | <a href="https://www.genecards.org/cgi-bin/carddisp.pl?gene=E2F3">https://www.genecards.org/cgi-bin/carddisp.pl?gene=E2F3</a>             |
| MEF2A      | Myocyte Enhancer Factor 2A                                               | Protein coding | 47 | GC15P099565 | 0.811391175 | <a href="https://www.genecards.org/cgi-bin/carddisp.pl?gene=MEF2A">https://www.genecards.org/cgi-bin/carddisp.pl?gene=MEF2A</a>           |
| HBEGF      | Heparin Binding EGF Like Growth Factor                                   | Protein coding | 43 | GC05M140332 | 0.810198665 | <a href="https://www.genecards.org/cgi-bin/carddisp.pl?gene=HBEGF">https://www.genecards.org/cgi-bin/carddisp.pl?gene=HBEGF</a>           |
| TUBA1B     | Tubulin $\alpha$ 1b                                                      | Protein coding | 43 | GC12M049127 | 0.80987674  | <a href="https://www.genecards.org/cgi-bin/carddisp.pl?gene=TUBA1B">https://www.genecards.org/cgi-bin/carddisp.pl?gene=TUBA1B</a>         |
| PAX6       | Paired Box 6                                                             | Protein coding | 48 | GC11M031784 | 0.809711874 | <a href="https://www.genecards.org/cgi-bin/carddisp.pl?gene=PAX6">https://www.genecards.org/cgi-bin/carddisp.pl?gene=PAX6</a>             |
| MAP3K5     | Mitogen-Activated Protein Kinase Kinase Kinase 5                         | Protein coding | 47 | GC06M136557 | 0.808623374 | <a href="https://www.genecards.org/cgi-bin/carddisp.pl?gene=MAP3K5">https://www.genecards.org/cgi-bin/carddisp.pl?gene=MAP3K5</a>         |
| PTGER1     | Prostaglandin E Receptor 1                                               | Protein coding | 41 | GC19M014444 | 0.808265865 | <a href="https://www.genecards.org/cgi-bin/carddisp.pl?gene=PTGER1">https://www.genecards.org/cgi-bin/carddisp.pl?gene=PTGER1</a>         |
| ELOC       | Elongin C                                                                | Protein coding | 33 | GC08M073939 | 0.803192258 | <a href="https://www.genecards.org/cgi-bin/carddisp.pl?gene=ELOC">https://www.genecards.org/cgi-bin/carddisp.pl?gene=ELOC</a>             |
| CHRM3      | Cholinergic Receptor Muscarinic 3                                        | Protein coding | 49 | GC01P239386 | 0.801447749 | <a href="https://www.genecards.org/cgi-bin/carddisp.pl?gene=CHRM3">https://www.genecards.org/cgi-bin/carddisp.pl?gene=CHRM3</a>           |
| PEX2       | Peroxisomal Biogenesis Factor 2                                          | Protein coding | 44 | GC08M076980 | 0.801447749 | <a href="https://www.genecards.org/cgi-bin/carddisp.pl?gene=PEX2">https://www.genecards.org/cgi-bin/carddisp.pl?gene=PEX2</a>             |
| CCL22      | C-C Motif Chemokine Ligand 22                                            | Protein coding | 37 | GC16P057359 | 0.801447749 | <a href="https://www.genecards.org/cgi-bin/carddisp.pl?gene=CCL22">https://www.genecards.org/cgi-bin/carddisp.pl?gene=CCL22</a>           |
| MIR330     | MicroRNA 330                                                             | RNA gene       | 19 | GC19M048745 | 0.79873836  | <a href="https://www.genecards.org/cgi-bin/carddisp.pl?gene=MIR330">https://www.genecards.org/cgi-bin/carddisp.pl?gene=MIR330</a>         |
| KCNIP2     | Potassium Voltage-Gated Channel Interacting Protein 2                    | Protein coding | 40 | GC10M101825 | 0.798304141 | <a href="https://www.genecards.org/cgi-bin/carddisp.pl?gene=KCNIP2">https://www.genecards.org/cgi-bin/carddisp.pl?gene=KCNIP2</a>         |
| MIR494     | MicroRNA 494                                                             | RNA gene       | 17 | GC14P106826 | 0.798304141 | <a href="https://www.genecards.org/cgi-bin/carddisp.pl?gene=MIR494">https://www.genecards.org/cgi-bin/carddisp.pl?gene=MIR494</a>         |
| HTR1F      | 5-Hydroxytryptamine Receptor 1F                                          | Protein coding | 44 | GC03P087792 | 0.797503352 | <a href="https://www.genecards.org/cgi-bin/carddisp.pl?gene=HTR1F">https://www.genecards.org/cgi-bin/carddisp.pl?gene=HTR1F</a>           |
| SLC5A7     | Solute Carrier Family 5 Member 7                                         | Protein coding | 43 | GC02P107969 | 0.797503352 | <a href="https://www.genecards.org/cgi-bin/carddisp.pl?gene=SLC5A7">https://www.genecards.org/cgi-bin/carddisp.pl?gene=SLC5A7</a>         |
| KCNK10     | Potassium Two Pore Domain Channel Subfamily K Member 10                  | Protein coding | 40 | GC14M088180 | 0.797503352 | <a href="https://www.genecards.org/cgi-bin/carddisp.pl?gene=KCNK10">https://www.genecards.org/cgi-bin/carddisp.pl?gene=KCNK10</a>         |
| RAMP3      | Receptor Activity Modifying Protein 3                                    | Protein coding | 40 | GC07P045163 | 0.797503352 | <a href="https://www.genecards.org/cgi-bin/carddisp.pl?gene=RAMP3">https://www.genecards.org/cgi-bin/carddisp.pl?gene=RAMP3</a>           |
| ARHGEF16   | Rho Guanine Nucleotide Exchange Factor 16                                | Protein coding | 39 | GC01P003454 | 0.797503352 | <a href="https://www.genecards.org/cgi-bin/carddisp.pl?gene=ARHGEF16">https://www.genecards.org/cgi-bin/carddisp.pl?gene=ARHGEF16</a>     |
| KCNS1      | Potassium Voltage-Gated Channel Modifier Subfamily S Member 1            | Protein coding | 39 | GC20M045099 | 0.797503352 | <a href="https://www.genecards.org/cgi-bin/carddisp.pl?gene=KCNS1">https://www.genecards.org/cgi-bin/carddisp.pl?gene=KCNS1</a>           |
| CDR2       | Cerebellar Degeneration Related Protein 2                                | Protein coding | 38 | GC16M022357 | 0.797503352 | <a href="https://www.genecards.org/cgi-bin/carddisp.pl?gene=CDR2">https://www.genecards.org/cgi-bin/carddisp.pl?gene=CDR2</a>             |
| DPYSL5     | Dihydropyrimidinase Like 5                                               | Protein coding | 38 | GC02P026847 | 0.797503352 | <a href="https://www.genecards.org/cgi-bin/carddisp.pl?gene=DPYSL5">https://www.genecards.org/cgi-bin/carddisp.pl?gene=DPYSL5</a>         |
| FHL5       | Four And A Half LIM Domains 5                                            | Protein coding | 38 | GC06P096562 | 0.797503352 | <a href="https://www.genecards.org/cgi-bin/carddisp.pl?gene=FHL5">https://www.genecards.org/cgi-bin/carddisp.pl?gene=FHL5</a>             |
| GABRQ      | $\gamma$ -Aminobutyric Acid Type A Receptor Subunit $\theta$             | Protein coding | 38 | GC0XP152638 | 0.797503352 | <a href="https://www.genecards.org/cgi-bin/carddisp.pl?gene=GABRQ">https://www.genecards.org/cgi-bin/carddisp.pl?gene=GABRQ</a>           |
| KCNK5      | Potassium Two Pore Domain Channel Subfamily K Member 5                   | Protein coding | 38 | GC06M049284 | 0.797503352 | <a href="https://www.genecards.org/cgi-bin/carddisp.pl?gene=KCNK5">https://www.genecards.org/cgi-bin/carddisp.pl?gene=KCNK5</a>           |
| CALCB      | Calcitonin Related Polypeptide $\beta$                                   | Protein coding | 37 | GC11P014904 | 0.797503352 | <a href="https://www.genecards.org/cgi-bin/carddisp.pl?gene=CALCB">https://www.genecards.org/cgi-bin/carddisp.pl?gene=CALCB</a>           |
| TMEM67     | Transmembrane Protein 67                                                 | Protein coding | 37 | GC08P093754 | 0.797503352 | <a href="https://www.genecards.org/cgi-bin/carddisp.pl?gene=TMEM67">https://www.genecards.org/cgi-bin/carddisp.pl?gene=TMEM67</a>         |
| MRGPRG-AS1 | MRGPRG Antisense RNA 1                                                   | RNA gene       | 18 | GC11P003218 | 0.797503352 | <a href="https://www.genecards.org/cgi-bin/carddisp.pl?gene=MRGPRG-AS1">https://www.genecards.org/cgi-bin/carddisp.pl?gene=MRGPRG-AS1</a> |
| IL23A      | Interleukin 23 Subunit $\alpha$                                          | Protein coding | 38 | GC12P056509 | 0.793510854 | <a href="https://www.genecards.org/cgi-bin/carddisp.pl?gene=IL23A">https://www.genecards.org/cgi-bin/carddisp.pl?gene=IL23A</a>           |
| CD58       | CD58 Molecule                                                            | Protein coding | 39 | GC01M116514 | 0.790507197 | <a href="https://www.genecards.org/cgi-bin/carddisp.pl?gene=CD58">https://www.genecards.org/cgi-bin/carddisp.pl?gene=CD58</a>             |
| HCN4       | Hyperpolarization Activated Cyclic Nucleotide Gated Potassium Channel 4  | Protein coding | 48 | GC15M073319 | 0.790501535 | <a href="https://www.genecards.org/cgi-bin/carddisp.pl?gene=HCN4">https://www.genecards.org/cgi-bin/carddisp.pl?gene=HCN4</a>             |
| NR1H4      | Nuclear Receptor Subfamily 1 Group H Member 4                            | Protein coding | 48 | GC12P100473 | 0.789487541 | <a href="https://www.genecards.org/cgi-bin/carddisp.pl?gene=NR1H4">https://www.genecards.org/cgi-bin/carddisp.pl?gene=NR1H4</a>           |
| COL9A2     | Collagen Type IX $\alpha$ 2 Chain                                        | Protein coding | 43 | GC01M040300 | 0.787650883 | <a href="https://www.genecards.org/cgi-bin/carddisp.pl?gene=COL9A2">https://www.genecards.org/cgi-bin/carddisp.pl?gene=COL9A2</a>         |
| GJC1       | Gap Junction Protein $\gamma$ 1                                          | Protein coding | 42 | GC17M044800 | 0.786889791 | <a href="https://www.genecards.org/cgi-bin/carddisp.pl?gene=GJC1">https://www.genecards.org/cgi-bin/carddisp.pl?gene=GJC1</a>             |
| DROSHA     | Drosha Ribonuclease III                                                  | Protein coding | 43 | GC05M031401 | 0.784453094 | <a href="https://www.genecards.org/cgi-bin/carddisp.pl?gene=DROSHA">https://www.genecards.org/cgi-bin/carddisp.pl?gene=DROSHA</a>         |
| GFRA1      | GNDF Family Receptor $\alpha$ 1                                          | Protein coding | 43 | GC10M116056 | 0.784453094 | <a href="https://www.genecards.org/cgi-bin/carddisp.pl?gene=GFRA1">https://www.genecards.org/cgi-bin/carddisp.pl?gene=GFRA1</a>           |
| TNNI3K     | TNNI3 Interacting Kinase                                                 | Protein coding | 41 | GC01P074235 | 0.784351408 | <a href="https://www.genecards.org/cgi-bin/carddisp.pl?gene=TNNI3K">https://www.genecards.org/cgi-bin/carddisp.pl?gene=TNNI3K</a>         |
| NINJ1      | Ninjurin 1                                                               | Protein coding | 39 | GC09M093121 | 0.782953799 | <a href="https://www.genecards.org/cgi-bin/carddisp.pl?gene=NINJ1">https://www.genecards.org/cgi-bin/carddisp.pl?gene=NINJ1</a>           |
| CEBPA      | CCAAT Enhancer Binding Protein $\alpha$                                  | Protein coding | 47 | GC19M033299 | 0.782004654 | <a href="https://www.genecards.org/cgi-bin/carddisp.pl?gene=CEBPA">https://www.genecards.org/cgi-bin/carddisp.pl?gene=CEBPA</a>           |
| HAS2       | Hyaluronan Synthase 2                                                    | Protein coding | 41 | GC08M121594 | 0.781396747 | <a href="https://www.genecards.org/cgi-bin/carddisp.pl?gene=HAS2">https://www.genecards.org/cgi-bin/carddisp.pl?gene=HAS2</a>             |
| PIK3CB     | Phosphatidylinositol-4,5-Bisphosphate 3-Kinase Catalytic Subunit $\beta$ | Protein coding | 49 | GC03M138652 | 0.777041912 | <a href="https://www.genecards.org/cgi-bin/carddisp.pl?gene=PIK3CB">https://www.genecards.org/cgi-bin/carddisp.pl?gene=PIK3CB</a>         |
| BAG3       | BAG Cochaperone 3                                                        | Protein coding | 44 | GC10P119651 | 0.773385763 | <a href="https://www.genecards.org/cgi-bin/carddisp.pl?gene=BAG3">https://www.genecards.org/cgi-bin/carddisp.pl?gene=BAG3</a>             |
| LCK        | LCK Proto-Oncogene, Src Family Tyrosine Kinase                           | Protein coding | 52 | GC01P032251 | 0.77178967  | <a href="https://www.genecards.org/cgi-bin/carddisp.pl?gene=LCK">https://www.genecards.org/cgi-bin/carddisp.pl?gene=LCK</a>               |
| ALOX15B    | Arachidonate 15-Lipoxygenase Type B                                      | Protein coding | 42 | GC17P008039 | 0.771756172 | <a href="https://www.genecards.org/cgi-bin/carddisp.pl?gene=ALOX15B">https://www.genecards.org/cgi-bin/carddisp.pl?gene=ALOX15B</a>       |
| PLK4       | Polo Like Kinase 4                                                       | Protein coding | 48 | GC04P127880 | 0.771329463 | <a href="https://www.genecards.org/cgi-bin/carddisp.pl?gene=PLK4">https://www.genecards.org/cgi-bin/carddisp.pl?gene=PLK4</a>             |
| HLA-S      | Major Histocompatibility Complex, Class I, S (Pseudogene)                | Pseudogene     | 7  | GC06M031381 | 0.771329463 | <a href="https://www.genecards.org/cgi-bin/carddisp.pl?gene=HLA-S">https://www.genecards.org/cgi-bin/carddisp.pl?gene=HLA-S</a>           |
| RIPK1      | Receptor Interacting Serine/Threonine Kinase 1                           | Protein coding | 49 | GC06P003073 | 0.770456254 | <a href="https://www.genecards.org/cgi-bin/carddisp.pl?gene=RIPK1">https://www.genecards.org/cgi-bin/carddisp.pl?gene=RIPK1</a>           |
| FKBP4      | FKBP Prolyl Isomerase 4                                                  | Protein coding | 44 | GC12P002795 | 0.770243466 | <a href="https://www.genecards.org/cgi-bin/carddisp.pl?gene=FKBP4">https://www.genecards.org/cgi-bin/carddisp.pl?gene=FKBP4</a>           |
| MYOG       | Myogenin                                                                 | Protein coding | 40 | GC01M203083 | 0.770243466 | <a href="https://www.genecards.org/cgi-bin/carddisp.pl?gene=MYOG">https://www.genecards.org/cgi-bin/carddisp.pl?gene=MYOG</a>             |
| IRX4       | Iroquois Homeobox 4                                                      | Protein coding | 38 | GC05M001877 | 0.767645121 | <a href="https://www.genecards.org/cgi-bin/carddisp.pl?gene=IRX4">https://www.genecards.org/cgi-bin/carddisp.pl?gene=IRX4</a>             |
| CIB1       | Calcium And Integrin Binding 1                                           | Protein coding | 41 | GC15M090229 | 0.765729606 | <a href="https://www.genecards.org/cgi-bin/carddisp.pl?gene=CIB1">https://www.genecards.org/cgi-bin/carddisp.pl?gene=CIB1</a>             |
| TBX2       | T-Box Transcription Factor 2                                             | Protein coding | 45 | GC17P061399 | 0.764579654 | <a href="https://www.genecards.org/cgi-bin/carddisp.pl?gene=TBX2">https://www.genecards.org/cgi-bin/carddisp.pl?gene=TBX2</a>             |
| BCKDHA     | Branched Chain Keto Acid Dehydrogenase E1 Subunit $\alpha$               | Protein coding | 44 | GC19P041761 | 0.764579654 | <a href="https://www.genecards.org/cgi-bin/carddisp.pl?gene=BCKDHA">https://www.genecards.org/cgi-bin/carddisp.pl?gene=BCKDHA</a>         |
| GCSH       | Glycine Cleavage System Protein H                                        | Protein coding | 43 | GC16M081081 | 0.764579654 | <a href="https://www.genecards.org/cgi-bin/carddisp.pl?gene=GCSH">https://www.genecards.org/cgi-bin/carddisp.pl?gene=GCSH</a>             |
| ZFPM2      | Zinc Finger Protein, FOG Family Member 2                                 | Protein coding | 42 | GC08P104590 | 0.764579654 | <a href="https://www.genecards.org/cgi-bin/carddisp.pl?gene=ZFPM2">https://www.genecards.org/cgi-bin/carddisp.pl?gene=ZFPM2</a>           |
| COX8A      | Cytochrome C Oxidase Subunit 8A                                          | Protein coding | 41 | GC11P064005 | 0.764579654 | <a href="https://www.genecards.org/cgi-bin/carddisp.pl?gene=COX8A">https://www.genecards.org/cgi-bin/carddisp.pl?gene=COX8A</a>           |
| MED15      | Mediator Complex Subunit 15                                              | Protein coding | 40 | GC22P020602 | 0.764579654 | <a href="https://www.genecards.org/cgi-bin/carddisp.pl?gene=MED15">https://www.genecards.org/cgi-bin/carddisp.pl?gene=MED15</a>           |
| PGAP1      | Post-GPI Attachment To Proteins Inositol Deacylase 1                     | Protein coding | 40 | GC02M196833 | 0.764579654 | <a href="https://www.genecards.org/cgi-bin/carddisp.pl?gene=PGAP1">https://www.genecards.org/cgi-bin/carddisp.pl?gene=PGAP1</a>           |
| EXOSC10    | Exosome Component 10                                                     | Protein coding | 38 | GC01M011067 | 0.764579654 | <a href="https://www.genecards.org/cgi-bin/carddisp.pl?gene=EXOSC10">https://www.genecards.org/cgi-bin/carddisp.pl?gene=EXOSC10</a>       |
| ZNF74      | Zinc Finger Protein 74                                                   | Protein coding | 38 | GC22P020394 | 0.764579654 | <a href="https://www.genecards.org/cgi-bin/carddisp.pl?gene=ZNF74">https://www.genecards.org/cgi-bin/carddisp.pl?gene=ZNF74</a>           |
| LMBRD1     | LMBR1 Domain Containing 1                                                | Protein coding | 38 | GC06M069675 | 0.764579654 | <a href="https://www.genecards.org/cgi-bin/carddisp.pl?gene=LMBRD1">https://www.genecards.org/cgi-bin/carddisp.pl?gene=LMBRD1</a>         |
| CENPB      | Centromere Protein B                                                     | Protein coding | 37 | GC20M003783 | 0.764579654 | <a href="https://www.genecards.org/cgi-bin/carddisp.pl?gene=CENPB">https://www.genecards.org/cgi-bin/carddisp.pl?gene=CENPB</a>           |
| GKN1       | Gastrokine 1                                                             | Protein coding | 37 | GC02P068974 | 0.764579654 | <a href="https://www.genecards.org/cgi-bin/carddisp.pl?gene=GKN1">https://www.genecards.org/cgi-bin/carddisp.pl?gene=GKN1</a>             |
| PCDH18     | Protocadherin 18                                                         | Protein coding | 37 | GC04M137518 | 0.764579654 | <a href="https://www.genecards.org/cgi-bin/carddisp.pl?gene=PCDH18">https://www.genecards.org/cgi-bin/carddisp.pl?gene=PCDH18</a>         |
| TSSK1B     | Testis Specific Serine Kinase 1B                                         | Protein coding | 37 | GC05M113432 | 0.764579654 | <a href="https://www.genecards.org/cgi-bin/carddisp.pl?gene=TSSK1B">https://www.genecards.org/cgi-bin/carddisp.pl?gene=TSSK1B</a>         |
| LAX1       | Lymphocyte Transmembrane Adaptor 1                                       | Protein coding | 36 | GC01P203768 | 0.764579654 | <a href="https://www.genecards.org/cgi-bin/carddisp.pl?gene=LAX1">https://www.genecards.org/cgi-bin/carddisp.pl?gene=LAX1</a>             |
| RIMBP2     | RIMS Binding Protein 2                                                   | Protein coding | 36 | GC12M130396 | 0.764579654 | <a href="https://www.genecards.org/cgi-bin/carddisp.pl?gene=RIMBP2">https://www.genecards.org/cgi-bin/carddisp.pl?gene=RIMBP2</a>         |
| AAR2       | AAR2 Splicing Factor                                                     | Protein coding | 35 | GC20P036236 | 0.764579654 | <a href="https://www.genecards.org/cgi-bin/carddisp.pl?gene=AAR2">https://www.genecards.org/cgi-bin/carddisp.pl?gene=AAR2</a>             |
| UFD1       | Ubiquitin Recognition Factor In ER Associated Degradation 1              | Protein coding | 35 | GC22M019450 | 0.764579654 | <a href="https://www.genecards.org/cgi-bin/carddisp.pl?gene=UFD1">https://www.genecards.org/cgi-bin/carddisp.pl?gene=UFD1</a>             |
| HUS1B      | HUS1 Checkpoint Clamp Component B                                        | Protein coding | 34 | GC06M000655 | 0.764579654 | <a href="https://www.genecards.org/cgi-bin/carddisp.pl?gene=HUS1B">https://www.genecards.org/cgi-bin/carddisp.pl?gene=HUS1B</a>           |
| GGACT      | $\gamma$ -Glutamylamine Cyclotransferase                                 | Protein coding | 33 | GC13M100530 | 0.764579654 | <a href="https://www.genecards.org/cgi-bin/carddisp.pl?gene=GGACT">https://www.genecards.org/cgi-bin/carddisp.pl?gene=GGACT</a>           |
| KCTD19     | Potassium Channel Tetramerization Domain Containing 19                   | Protein coding | 32 | GC16M067310 | 0.764579654 | <a href="https://www.genecards.org/cgi-bin/carddisp.pl?gene=KCTD19">https://www.genecards.org/cgi-bin/carddisp.pl?gene=KCTD19</a>         |
| GLOD5      | Glyoxalase Domain Containing 5                                           | Protein coding | 29 | GC0XP048761 | 0.764579654 | <a href="https://www.genecards.org/cgi-bin/carddisp.pl?gene=GLOD5">https://www.genecards.org/cgi-bin/carddisp.pl?gene=GLOD5</a>           |
| QARS1      | Glutaminyl-TRNA Synthetase 1                                             | Protein coding | 28 | GC03M049516 | 0.764579654 | <a href="https://www.genecards.org/cgi-bin/carddisp.pl?gene=QARS1">https://www.genecards.org/cgi-bin/carddisp.pl?gene=QARS1</a>           |
| STMND1     | Stathmin Domain Containing 1                                             | Protein coding | 25 | GC06P017104 | 0.764579654 | <a href="https://www.genecards.org/cgi-bin/carddisp.pl?gene=STMND1">https://www.genecards.org/cgi-bin/carddisp.pl?gene=STMND1</a>         |
| TSIX       | TSIX Transcript, XIST Antisense RNA                                      | RNA gene       | 15 | GC0XP073792 | 0.764579654 | <a href="https://www.genecards.org/cgi-bin/carddisp.pl?gene=TSIX">https://www.genecards.org/cgi-bin/carddisp.pl?gene=TSIX</a>             |

|           |                                                                          |                |    |             |             |                                                                                                                                         |
|-----------|--------------------------------------------------------------------------|----------------|----|-------------|-------------|-----------------------------------------------------------------------------------------------------------------------------------------|
| HSD17B10  | Hydroxysteroid 17-β Dehydrogenase 10                                     | Protein coding | 45 | GC0XM053431 | 0.76371932  | <a href="https://www.genecards.org/cgi-bin/carddisp.pl?gene=HSD17B10">https://www.genecards.org/cgi-bin/carddisp.pl?gene=HSD17B10</a>   |
| KIAA0586  | KIAA0586                                                                 | Protein coding | 35 | GC14P058427 | 0.76371932  | <a href="https://www.genecards.org/cgi-bin/carddisp.pl?gene=KIAA0586">https://www.genecards.org/cgi-bin/carddisp.pl?gene=KIAA0586</a>   |
| MIR106B   | MicroRNA 106b                                                            | RNA gene       | 22 | GC07M100605 | 0.76371932  | <a href="https://www.genecards.org/cgi-bin/carddisp.pl?gene=MIR106B">https://www.genecards.org/cgi-bin/carddisp.pl?gene=MIR106B</a>     |
| MIR92A1   | MicroRNA 92a-1                                                           | RNA gene       | 20 | GC13P091474 | 0.76371932  | <a href="https://www.genecards.org/cgi-bin/carddisp.pl?gene=MIR92A1">https://www.genecards.org/cgi-bin/carddisp.pl?gene=MIR92A1</a>     |
| LMO4      | LIM Domain Only 4                                                        | Protein coding | 39 | GC01P087329 | 0.760850668 | <a href="https://www.genecards.org/cgi-bin/carddisp.pl?gene=LMO4">https://www.genecards.org/cgi-bin/carddisp.pl?gene=LMO4</a>           |
| GNE       | Glucosamine (UDP-N-Acetyl)-2-Epimerase/N-Acetylmannosamine Kinase        | Protein coding | 44 | GC09M036214 | 0.760575712 | <a href="https://www.genecards.org/cgi-bin/carddisp.pl?gene=GNE">https://www.genecards.org/cgi-bin/carddisp.pl?gene=GNE</a>             |
| MSH6      | MutS Homolog 6                                                           | Protein coding | 50 | GC02P047695 | 0.758908451 | <a href="https://www.genecards.org/cgi-bin/carddisp.pl?gene=MSH6">https://www.genecards.org/cgi-bin/carddisp.pl?gene=MSH6</a>           |
| MLH1      | MutL Homolog 1                                                           | Protein coding | 48 | GC03P036993 | 0.758908451 | <a href="https://www.genecards.org/cgi-bin/carddisp.pl?gene=MLH1">https://www.genecards.org/cgi-bin/carddisp.pl?gene=MLH1</a>           |
| SGSH      | N-Sulfoglucosamine Sulfohydrolase                                        | Protein coding | 44 | GC17M080206 | 0.758908451 | <a href="https://www.genecards.org/cgi-bin/carddisp.pl?gene=SGSH">https://www.genecards.org/cgi-bin/carddisp.pl?gene=SGSH</a>           |
| ATXN1     | Ataxin 1                                                                 | Protein coding | 44 | GC06M016299 | 0.754904509 | <a href="https://www.genecards.org/cgi-bin/carddisp.pl?gene=ATXN1">https://www.genecards.org/cgi-bin/carddisp.pl?gene=ATXN1</a>         |
| OLIG1     | Oligodendrocyte Transcription Factor 1                                   | Protein coding | 38 | GC21P033070 | 0.754871011 | <a href="https://www.genecards.org/cgi-bin/carddisp.pl?gene=OLIG1">https://www.genecards.org/cgi-bin/carddisp.pl?gene=OLIG1</a>         |
| ARSH      | Arylsulfatase Family Member H                                            | Protein coding | 34 | GC0XP003006 | 0.752778769 | <a href="https://www.genecards.org/cgi-bin/carddisp.pl?gene=ARSH">https://www.genecards.org/cgi-bin/carddisp.pl?gene=ARSH</a>           |
| RHO       | Rhodopsin                                                                | Protein coding | 47 | GC03P131767 | 0.750165164 | <a href="https://www.genecards.org/cgi-bin/carddisp.pl?gene=RHO">https://www.genecards.org/cgi-bin/carddisp.pl?gene=RHO</a>             |
| YWHAZ     | Tyrosine 3-Monooxygenase/Tryptophan 5-Monooxygenase Activation Protein ζ | Protein coding | 47 | GC08M100917 | 0.750165164 | <a href="https://www.genecards.org/cgi-bin/carddisp.pl?gene=YWHAZ">https://www.genecards.org/cgi-bin/carddisp.pl?gene=YWHAZ</a>         |
| EPX       | Eosinophil Peroxidase                                                    | Protein coding | 43 | GC17P058192 | 0.750165164 | <a href="https://www.genecards.org/cgi-bin/carddisp.pl?gene=EPX">https://www.genecards.org/cgi-bin/carddisp.pl?gene=EPX</a>             |
| POLR1F    | RNA Polymerase I Subunit F                                               | Protein coding | 28 | GC07M019695 | 0.749539733 | <a href="https://www.genecards.org/cgi-bin/carddisp.pl?gene=POLR1F">https://www.genecards.org/cgi-bin/carddisp.pl?gene=POLR1F</a>       |
| SERPINA10 | Serpin Family A Member 10                                                | Protein coding | 38 | GC14M094280 | 0.748741329 | <a href="https://www.genecards.org/cgi-bin/carddisp.pl?gene=SERPINA10">https://www.genecards.org/cgi-bin/carddisp.pl?gene=SERPINA10</a> |
| CAPN5     | Calpain 5                                                                | Protein coding | 44 | GC11P077066 | 0.748452902 | <a href="https://www.genecards.org/cgi-bin/carddisp.pl?gene=CAPN5">https://www.genecards.org/cgi-bin/carddisp.pl?gene=CAPN5</a>         |
| CD2AP     | CD2 Associated Protein                                                   | Protein coding | 43 | GC06P058546 | 0.748452902 | <a href="https://www.genecards.org/cgi-bin/carddisp.pl?gene=CD2AP">https://www.genecards.org/cgi-bin/carddisp.pl?gene=CD2AP</a>         |
| CPT1B     | Carnitine Palmitoyltransferase 1B                                        | Protein coding | 44 | GC22M050785 | 0.748449147 | <a href="https://www.genecards.org/cgi-bin/carddisp.pl?gene=CPT1B">https://www.genecards.org/cgi-bin/carddisp.pl?gene=CPT1B</a>         |
| FSTL1     | Follistatin Like 1                                                       | Protein coding | 40 | GC03M120392 | 0.74785322  | <a href="https://www.genecards.org/cgi-bin/carddisp.pl?gene=FSTL1">https://www.genecards.org/cgi-bin/carddisp.pl?gene=FSTL1</a>         |
| SOX17     | SRY-Box Transcription Factor 17                                          | Protein coding | 43 | GC08P054457 | 0.747522533 | <a href="https://www.genecards.org/cgi-bin/carddisp.pl?gene=SOX17">https://www.genecards.org/cgi-bin/carddisp.pl?gene=SOX17</a>         |
| PER2      | Period Circadian Regulator 2                                             | Protein coding | 44 | GC02M238244 | 0.747383714 | <a href="https://www.genecards.org/cgi-bin/carddisp.pl?gene=PER2">https://www.genecards.org/cgi-bin/carddisp.pl?gene=PER2</a>           |
| YAP1      | Yes1 Associated Transcriptional Regulator                                | Protein coding | 48 | GC11P102110 | 0.746050239 | <a href="https://www.genecards.org/cgi-bin/carddisp.pl?gene=YAP1">https://www.genecards.org/cgi-bin/carddisp.pl?gene=YAP1</a>           |
| SMPD2     | Sphingomyelin Phosphodiesterase 2                                        | Protein coding | 41 | GC06P109440 | 0.746050239 | <a href="https://www.genecards.org/cgi-bin/carddisp.pl?gene=SMPD2">https://www.genecards.org/cgi-bin/carddisp.pl?gene=SMPD2</a>         |
| MOAP1     | Modulator Of Apoptosis 1                                                 | Protein coding | 36 | GC14M093182 | 0.746050239 | <a href="https://www.genecards.org/cgi-bin/carddisp.pl?gene=MOAP1">https://www.genecards.org/cgi-bin/carddisp.pl?gene=MOAP1</a>         |
| INTS5     | Integrator Complex Subunit 5                                             | Protein coding | 34 | GC11M071528 | 0.744887114 | <a href="https://www.genecards.org/cgi-bin/carddisp.pl?gene=INTS5">https://www.genecards.org/cgi-bin/carddisp.pl?gene=INTS5</a>         |
| IGFBP7    | Insulin Like Growth Factor Binding Protein 7                             | Protein coding | 45 | GC04M057030 | 0.744276226 | <a href="https://www.genecards.org/cgi-bin/carddisp.pl?gene=IGFBP7">https://www.genecards.org/cgi-bin/carddisp.pl?gene=IGFBP7</a>       |
| SGCB      | Sarcoglycan β                                                            | Protein coding | 40 | GC04M052019 | 0.743978262 | <a href="https://www.genecards.org/cgi-bin/carddisp.pl?gene=SGCB">https://www.genecards.org/cgi-bin/carddisp.pl?gene=SGCB</a>           |
| CRHR1     | Corticotropin Releasing Hormone Receptor 1                               | Protein coding | 45 | GC17P045784 | 0.740412354 | <a href="https://www.genecards.org/cgi-bin/carddisp.pl?gene=CRHR1">https://www.genecards.org/cgi-bin/carddisp.pl?gene=CRHR1</a>         |
| AKT1S1    | AKT1 Substrate 1                                                         | Protein coding | 40 | GC19M049869 | 0.740161479 | <a href="https://www.genecards.org/cgi-bin/carddisp.pl?gene=AKT1S1">https://www.genecards.org/cgi-bin/carddisp.pl?gene=AKT1S1</a>       |
| MIR23A    | MicroRNA 23a                                                             | RNA gene       | 21 | GC19M014150 | 0.73836422  | <a href="https://www.genecards.org/cgi-bin/carddisp.pl?gene=MIR23A">https://www.genecards.org/cgi-bin/carddisp.pl?gene=MIR23A</a>       |
| CDR1-AS   | CDR1 Antisense RNA                                                       | RNA gene       | 6  | GC0XU902169 | 0.733860254 | <a href="https://www.genecards.org/cgi-bin/carddisp.pl?gene=CDR1-AS">https://www.genecards.org/cgi-bin/carddisp.pl?gene=CDR1-AS</a>     |
| TAT       | Tyrosine Aminotransferase                                                | Protein coding | 44 | GC16M071565 | 0.728413761 | <a href="https://www.genecards.org/cgi-bin/carddisp.pl?gene=TAT">https://www.genecards.org/cgi-bin/carddisp.pl?gene=TAT</a>             |
| TFPI2     | Tissue Factor Pathway Inhibitor 2                                        | Protein coding | 41 | GC07M093885 | 0.726346612 | <a href="https://www.genecards.org/cgi-bin/carddisp.pl?gene=TFPI2">https://www.genecards.org/cgi-bin/carddisp.pl?gene=TFPI2</a>         |
| MMP16     | Matrix Metallopeptidase 16                                               | Protein coding | 45 | GC08M088032 | 0.72351557  | <a href="https://www.genecards.org/cgi-bin/carddisp.pl?gene=MMP16">https://www.genecards.org/cgi-bin/carddisp.pl?gene=MMP16</a>         |
| AP2B1     | Adaptor Related Protein Complex 2 Subunit β 1                            | Protein coding | 43 | GC17P035578 | 0.722908258 | <a href="https://www.genecards.org/cgi-bin/carddisp.pl?gene=AP2B1">https://www.genecards.org/cgi-bin/carddisp.pl?gene=AP2B1</a>         |
| LINGO1    | Leucine Rich Repeat And Ig Domain Containing 1                           | Protein coding | 43 | GC15M077613 | 0.722908258 | <a href="https://www.genecards.org/cgi-bin/carddisp.pl?gene=LINGO1">https://www.genecards.org/cgi-bin/carddisp.pl?gene=LINGO1</a>       |
| MRE11     | MRE11 Homolog, Double Strand Break Repair Nuclease                       | Protein coding | 41 | GC11M095000 | 0.722908258 | <a href="https://www.genecards.org/cgi-bin/carddisp.pl?gene=MRE11">https://www.genecards.org/cgi-bin/carddisp.pl?gene=MRE11</a>         |
| DHX37     | DEAH-Box Helicase 37                                                     | Protein coding | 38 | GC12M124946 | 0.722908258 | <a href="https://www.genecards.org/cgi-bin/carddisp.pl?gene=DHX37">https://www.genecards.org/cgi-bin/carddisp.pl?gene=DHX37</a>         |
| MFF       | Mitochondrial Fission Factor                                             | Protein coding | 38 | GC02P227325 | 0.722908258 | <a href="https://www.genecards.org/cgi-bin/carddisp.pl?gene=MFF">https://www.genecards.org/cgi-bin/carddisp.pl?gene=MFF</a>             |
| ATP2B4    | ATPase Plasma Membrane Ca2+ Transporting 4                               | Protein coding | 45 | GC01P203626 | 0.718460798 | <a href="https://www.genecards.org/cgi-bin/carddisp.pl?gene=ATP2B4">https://www.genecards.org/cgi-bin/carddisp.pl?gene=ATP2B4</a>       |
| PTAFR     | Platelet Activating Factor Receptor                                      | Protein coding | 43 | GC01M028147 | 0.718460798 | <a href="https://www.genecards.org/cgi-bin/carddisp.pl?gene=PTAFR">https://www.genecards.org/cgi-bin/carddisp.pl?gene=PTAFR</a>         |
| PLK1      | Polo Like Kinase 1                                                       | Protein coding | 50 | GC16P023988 | 0.715517104 | <a href="https://www.genecards.org/cgi-bin/carddisp.pl?gene=PLK1">https://www.genecards.org/cgi-bin/carddisp.pl?gene=PLK1</a>           |
| PRKAB1    | Protein Kinase AMP-Activated Non-Catalytic Subunit β 1                   | Protein coding | 47 | GC12P119632 | 0.711432934 | <a href="https://www.genecards.org/cgi-bin/carddisp.pl?gene=PRKAB1">https://www.genecards.org/cgi-bin/carddisp.pl?gene=PRKAB1</a>       |
| RAP1A     | RAP1A, Member Of RAS Oncogene Family                                     | Protein coding | 45 | GC01P111542 | 0.711432934 | <a href="https://www.genecards.org/cgi-bin/carddisp.pl?gene=RAP1A">https://www.genecards.org/cgi-bin/carddisp.pl?gene=RAP1A</a>         |
| PPP2R2B   | Protein Phosphatase 2 Regulatory Subunit Bβ                              | Protein coding | 45 | GC05M146582 | 0.710214138 | <a href="https://www.genecards.org/cgi-bin/carddisp.pl?gene=PPP2R2B">https://www.genecards.org/cgi-bin/carddisp.pl?gene=PPP2R2B</a>     |
| CLOCK     | Clock Circadian Regulator                                                | Protein coding | 44 | GC04M055427 | 0.708925247 | <a href="https://www.genecards.org/cgi-bin/carddisp.pl?gene=CLOCK">https://www.genecards.org/cgi-bin/carddisp.pl?gene=CLOCK</a>         |
| ATF4      | Activating Transcription Factor 4                                        | Protein coding | 46 | GC22P039558 | 0.706249833 | <a href="https://www.genecards.org/cgi-bin/carddisp.pl?gene=ATF4">https://www.genecards.org/cgi-bin/carddisp.pl?gene=ATF4</a>           |
| SNHG1     | Small Nucleolar RNA Host Gene 1                                          | RNA gene       | 20 | GC11M071539 | 0.70332408  | <a href="https://www.genecards.org/cgi-bin/carddisp.pl?gene=SNHG1">https://www.genecards.org/cgi-bin/carddisp.pl?gene=SNHG1</a>         |
| HLA-G     | Major Histocompatibility Complex, Class I, G                             | Protein coding | 44 | GC06P058239 | 0.702683926 | <a href="https://www.genecards.org/cgi-bin/carddisp.pl?gene=HLA-G">https://www.genecards.org/cgi-bin/carddisp.pl?gene=HLA-G</a>         |
| JUP       | Junction Plakoglobin                                                     | Protein coding | 47 | GC17M041754 | 0.701089978 | <a href="https://www.genecards.org/cgi-bin/carddisp.pl?gene=JUP">https://www.genecards.org/cgi-bin/carddisp.pl?gene=JUP</a>             |
| F2RL3     | F2R Like Thrombin Or Trypsin Receptor 3                                  | Protein coding | 46 | GC19P016888 | 0.699047029 | <a href="https://www.genecards.org/cgi-bin/carddisp.pl?gene=F2RL3">https://www.genecards.org/cgi-bin/carddisp.pl?gene=F2RL3</a>         |
| SIRT4     | Sirtuin 4                                                                | Protein coding | 40 | GC12P120291 | 0.696979821 | <a href="https://www.genecards.org/cgi-bin/carddisp.pl?gene=SIRT4">https://www.genecards.org/cgi-bin/carddisp.pl?gene=SIRT4</a>         |
| PAK1      | P21 (RAC1) Activated Kinase 1                                            | Protein coding | 48 | GC11M077321 | 0.695385277 | <a href="https://www.genecards.org/cgi-bin/carddisp.pl?gene=PAK1">https://www.genecards.org/cgi-bin/carddisp.pl?gene=PAK1</a>           |
| INPP5K    | Inositol Polyphosphate-5-Phosphatase K                                   | Protein coding | 44 | GC17M001494 | 0.693440616 | <a href="https://www.genecards.org/cgi-bin/carddisp.pl?gene=INPP5K">https://www.genecards.org/cgi-bin/carddisp.pl?gene=INPP5K</a>       |
| CDH23     | Cadherin Related 23                                                      | Protein coding | 42 | GC10P071396 | 0.693440616 | <a href="https://www.genecards.org/cgi-bin/carddisp.pl?gene=CDH23">https://www.genecards.org/cgi-bin/carddisp.pl?gene=CDH23</a>         |
| SLC29A1   | Solute Carrier Family 29 Member 1 (Augustine Blood Group)                | Protein coding | 48 | GC06P044219 | 0.689510763 | <a href="https://www.genecards.org/cgi-bin/carddisp.pl?gene=SLC29A1">https://www.genecards.org/cgi-bin/carddisp.pl?gene=SLC29A1</a>     |
| POSTN     | Periostin                                                                | Protein coding | 43 | GC13M037562 | 0.689510763 | <a href="https://www.genecards.org/cgi-bin/carddisp.pl?gene=POSTN">https://www.genecards.org/cgi-bin/carddisp.pl?gene=POSTN</a>         |
| LAMA4     | Laminin Subunit α 4                                                      | Protein coding | 44 | GC06M112107 | 0.687026918 | <a href="https://www.genecards.org/cgi-bin/carddisp.pl?gene=LAMA4">https://www.genecards.org/cgi-bin/carddisp.pl?gene=LAMA4</a>         |
| PRMT1     | Protein Arginine Methyltransferase 1                                     | Protein coding | 47 | GC19P049675 | 0.685995102 | <a href="https://www.genecards.org/cgi-bin/carddisp.pl?gene=PRMT1">https://www.genecards.org/cgi-bin/carddisp.pl?gene=PRMT1</a>         |
| PTPRJ     | Protein Tyrosine Phosphatase Receptor Type J                             | Protein coding | 47 | GC11P048002 | 0.685995102 | <a href="https://www.genecards.org/cgi-bin/carddisp.pl?gene=PTPRJ">https://www.genecards.org/cgi-bin/carddisp.pl?gene=PTPRJ</a>         |
| PARVA     | Parvin α                                                                 | Protein coding | 44 | GC11P012398 | 0.685995102 | <a href="https://www.genecards.org/cgi-bin/carddisp.pl?gene=PARVA">https://www.genecards.org/cgi-bin/carddisp.pl?gene=PARVA</a>         |
| PPIA      | Peptidylprolyl Isomerase A                                               | Protein coding | 47 | GC07P044807 | 0.685666263 | <a href="https://www.genecards.org/cgi-bin/carddisp.pl?gene=PPIA">https://www.genecards.org/cgi-bin/carddisp.pl?gene=PPIA</a>           |
| FDFT1     | Farnesyl-Diphosphate Farnesyltransferase 1                               | Protein coding | 45 | GC08P011795 | 0.685666263 | <a href="https://www.genecards.org/cgi-bin/carddisp.pl?gene=FDFT1">https://www.genecards.org/cgi-bin/carddisp.pl?gene=FDFT1</a>         |
| TREM1     | Triggering Receptor Expressed On Myeloid Cells 1                         | Protein coding | 40 | GC06M041267 | 0.685246289 | <a href="https://www.genecards.org/cgi-bin/carddisp.pl?gene=TREM1">https://www.genecards.org/cgi-bin/carddisp.pl?gene=TREM1</a>         |
| SYK       | Spleen Associated Tyrosine Kinase                                        | Protein coding | 50 | GC09P091451 | 0.683771729 | <a href="https://www.genecards.org/cgi-bin/carddisp.pl?gene=SYK">https://www.genecards.org/cgi-bin/carddisp.pl?gene=SYK</a>             |
| HSPE1     | Heat Shock Protein Family E (Hsp10) Member 1                             | Protein coding | 40 | GC02P197501 | 0.682505608 | <a href="https://www.genecards.org/cgi-bin/carddisp.pl?gene=HSPE1">https://www.genecards.org/cgi-bin/carddisp.pl?gene=HSPE1</a>         |
| ZBTB7C    | Zinc Finger And BTB Domain Containing 7C                                 | Protein coding | 33 | GC18M048026 | 0.682505608 | <a href="https://www.genecards.org/cgi-bin/carddisp.pl?gene=ZBTB7C">https://www.genecards.org/cgi-bin/carddisp.pl?gene=ZBTB7C</a>       |
| TSC22D3   | TSC22 Domain Family Member 3                                             | Protein coding | 39 | GC0XM107713 | 0.680671692 | <a href="https://www.genecards.org/cgi-bin/carddisp.pl?gene=TSC22D3">https://www.genecards.org/cgi-bin/carddisp.pl?gene=TSC22D3</a>     |
| SESN2     | Sestrin 2                                                                | Protein coding | 38 | GC01P028270 | 0.680671692 | <a href="https://www.genecards.org/cgi-bin/carddisp.pl?gene=SESN2">https://www.genecards.org/cgi-bin/carddisp.pl?gene=SESN2</a>         |
| EFNB2     | Ephrin B2                                                                | Protein coding | 43 | GC13M106489 | 0.675477684 | <a href="https://www.genecards.org/cgi-bin/carddisp.pl?gene=EFNB2">https://www.genecards.org/cgi-bin/carddisp.pl?gene=EFNB2</a>         |
| SLC22A4   | Solute Carrier Family 22 Member 4                                        | Protein coding | 44 | GC05P132294 | 0.673317969 | <a href="https://www.genecards.org/cgi-bin/carddisp.pl?gene=SLC22A4">https://www.genecards.org/cgi-bin/carddisp.pl?gene=SLC22A4</a>     |
| SLC6A9    | Solute Carrier Family 6 Member 9                                         | Protein coding | 49 | GC01M043991 | 0.670294642 | <a href="https://www.genecards.org/cgi-bin/carddisp.pl?gene=SLC6A9">https://www.genecards.org/cgi-bin/carddisp.pl?gene=SLC6A9</a>       |
| HCRTR1    | Hypocretin Receptor 1                                                    | Protein coding | 44 | GC01P031587 | 0.669840634 | <a href="https://www.genecards.org/cgi-bin/carddisp.pl?gene=HCRTR1">https://www.genecards.org/cgi-bin/carddisp.pl?gene=HCRTR1</a>       |
| DLD       | Dihydrolipoamide Dehydrogenase                                           | Protein coding | 50 | GC07P107890 | 0.669540465 | <a href="https://www.genecards.org/cgi-bin/carddisp.pl?gene=DLD">https://www.genecards.org/cgi-bin/carddisp.pl?gene=DLD</a>             |

|          |                                                                                       |                |    |             |             |                                                             |
|----------|---------------------------------------------------------------------------------------|----------------|----|-------------|-------------|-------------------------------------------------------------|
| NISCH    | Nischarin                                                                             | Protein coding | 41 | GC03P052455 | 0.667599738 | https://www.genecards.org/cgi-bin/carddisp.pl?gene=NISCH    |
| KRT19    | Keratin 19                                                                            | Protein coding | 45 | GC17M041523 | 0.663361549 | https://www.genecards.org/cgi-bin/carddisp.pl?gene=KRT19    |
| SLC22A6  | Solute Carrier Family 22 Member 6                                                     | Protein coding | 44 | GC11M071550 | 0.663361549 | https://www.genecards.org/cgi-bin/carddisp.pl?gene=SLC22A6  |
| MAZ      | MYC Associated Zinc Finger Protein                                                    | Protein coding | 41 | GC16P029806 | 0.663361549 | https://www.genecards.org/cgi-bin/carddisp.pl?gene=MAZ      |
| MYOM2    | Myomesin 2                                                                            | Protein coding | 38 | GC08P002045 | 0.663361549 | https://www.genecards.org/cgi-bin/carddisp.pl?gene=MYOM2    |
| MIR424   | MicroRNA 424                                                                          | RNA gene       | 17 | GC0XM134660 | 0.663361549 | https://www.genecards.org/cgi-bin/carddisp.pl?gene=MIR424   |
| APC      | APC Regulator Of WNT Signaling Pathway                                                | Protein coding | 48 | GC05P112707 | 0.661694288 | https://www.genecards.org/cgi-bin/carddisp.pl?gene=APC      |
| MSH2     | MutS Homolog 2                                                                        | Protein coding | 48 | GC02P047402 | 0.661694288 | https://www.genecards.org/cgi-bin/carddisp.pl?gene=MSH2     |
| SLC11A1  | Solute Carrier Family 11 Member 1                                                     | Protein coding | 47 | GC02P218382 | 0.661694288 | https://www.genecards.org/cgi-bin/carddisp.pl?gene=SLC11A1  |
| POLD1    | DNA Polymerase $\delta$ 1, Catalytic Subunit                                          | Protein coding | 46 | GC19P050385 | 0.661694288 | https://www.genecards.org/cgi-bin/carddisp.pl?gene=POLD1    |
| BST1     | Bone Marrow Stromal Cell Antigen 1                                                    | Protein coding | 41 | GC04P015704 | 0.661694288 | https://www.genecards.org/cgi-bin/carddisp.pl?gene=BST1     |
| PRG2     | Proteoglycan 2, Pro Eosinophil Major Basic Protein                                    | Protein coding | 40 | GC11M057386 | 0.661694288 | https://www.genecards.org/cgi-bin/carddisp.pl?gene=PRG2     |
| ANO5     | Anoctamin 5                                                                           | Protein coding | 38 | GC11P021799 | 0.661694288 | https://www.genecards.org/cgi-bin/carddisp.pl?gene=ANO5     |
| CD52     | CD52 Molecule                                                                         | Protein coding | 36 | GC01P026317 | 0.661694288 | https://www.genecards.org/cgi-bin/carddisp.pl?gene=CD52     |
| STBD1    | Starch Binding Domain 1                                                               | Protein coding | 35 | GC04P076306 | 0.661694288 | https://www.genecards.org/cgi-bin/carddisp.pl?gene=STBD1    |
| HAR1B    | Highly Accelerated Region 1B                                                          | RNA gene       | 18 | GC20M063095 | 0.661694288 | https://www.genecards.org/cgi-bin/carddisp.pl?gene=HAR1B    |
| KIR2DL3  | Killer Cell Immunoglobulin Like Receptor, Two Ig Domains And Long Cytoplasmic Tail 3  | Protein coding | 37 | GC19P057267 | 0.660194993 | https://www.genecards.org/cgi-bin/carddisp.pl?gene=KIR2DL3  |
| KIR2DL2  | Killer Cell Immunoglobulin Like Receptor, Two Ig Domains And Long Cytoplasmic Tail 2  | Protein coding | 24 | GC19Mr00108 | 0.660194993 | https://www.genecards.org/cgi-bin/carddisp.pl?gene=KIR2DL2  |
| KIR2DS2  | Killer Cell Immunoglobulin Like Receptor, Two Ig Domains And Short Cytoplasmic Tail 2 | Protein coding | 24 | GC19MR00122 | 0.660194993 | https://www.genecards.org/cgi-bin/carddisp.pl?gene=KIR2DS2  |
| KIR2DS1  | Killer Cell Immunoglobulin Like Receptor, Two Ig Domains And Short Cytoplasmic Tail 1 | Protein coding | 22 | GC19Mr00063 | 0.660194993 | https://www.genecards.org/cgi-bin/carddisp.pl?gene=KIR2DS1  |
| FGF10    | Fibroblast Growth Factor 10                                                           | Protein coding | 46 | GC05M044340 | 0.659430027 | https://www.genecards.org/cgi-bin/carddisp.pl?gene=FGF10    |
| ST3GAL4  | ST3 $\beta$ -Galactoside $\alpha$ -2,3-Sialyltransferase 4                            | Protein coding | 42 | GC11P126355 | 0.659430027 | https://www.genecards.org/cgi-bin/carddisp.pl?gene=ST3GAL4  |
| KCNJ8    | Potassium Inwardly Rectifying Channel Subfamily J Member 8                            | Protein coding | 44 | GC12M021764 | 0.658339977 | https://www.genecards.org/cgi-bin/carddisp.pl?gene=KCNJ8    |
| NID1     | Nidogen 1                                                                             | Protein coding | 43 | GC01M235975 | 0.653608739 | https://www.genecards.org/cgi-bin/carddisp.pl?gene=NID1     |
| TEAD1    | TEA Domain Transcription Factor 1                                                     | Protein coding | 48 | GC11P012674 | 0.653555572 | https://www.genecards.org/cgi-bin/carddisp.pl?gene=TEAD1    |
| MIR766   | MicroRNA 766                                                                          | RNA gene       | 17 | GC0XM119646 | 0.653555572 | https://www.genecards.org/cgi-bin/carddisp.pl?gene=MIR766   |
| AQP3     | Aquaporin 3 (Gill Blood Group)                                                        | Protein coding | 47 | GC09M033431 | 0.651782334 | https://www.genecards.org/cgi-bin/carddisp.pl?gene=AQP3     |
| LRP2     | LDL Receptor Related Protein 2                                                        | Protein coding | 47 | GC02M169127 | 0.651071668 | https://www.genecards.org/cgi-bin/carddisp.pl?gene=LRP2     |
| LAMA2    | Laminin Subunit $\alpha$ 2                                                            | Protein coding | 43 | GC06P128863 | 0.651071668 | https://www.genecards.org/cgi-bin/carddisp.pl?gene=LAMA2    |
| PGR      | Progesterone Receptor                                                                 | Protein coding | 50 | GC11M101030 | 0.647279739 | https://www.genecards.org/cgi-bin/carddisp.pl?gene=PGR      |
| GAMT     | Guanidinoacetate N-Methyltransferase                                                  | Protein coding | 46 | GC19M001397 | 0.647279739 | https://www.genecards.org/cgi-bin/carddisp.pl?gene=GAMT     |
| TIMM8A   | Translocase Of Inner Mitochondrial Membrane 8A                                        | Protein coding | 43 | GC0XM101345 | 0.647279739 | https://www.genecards.org/cgi-bin/carddisp.pl?gene=TIMM8A   |
| PPARGC1B | PPARG Coactivator 1 $\beta$                                                           | Protein coding | 36 | GC05P149730 | 0.647279739 | https://www.genecards.org/cgi-bin/carddisp.pl?gene=PPARGC1B |
| GPR68    | G Protein-Coupled Receptor 68                                                         | Protein coding | 43 | GC14M091232 | 0.644716501 | https://www.genecards.org/cgi-bin/carddisp.pl?gene=GPR68    |
| SNHG16   | Small Nucleolar RNA Host Gene 16                                                      | RNA gene       | 18 | GC17P076811 | 0.644716501 | https://www.genecards.org/cgi-bin/carddisp.pl?gene=SNHG16   |
| PLA2G15  | Phospholipase A2 Group XV                                                             | Protein coding | 37 | GC16P068245 | 0.640435576 | https://www.genecards.org/cgi-bin/carddisp.pl?gene=PLA2G15  |
| PLEKHG1  | Pleckstrin Homology And RhoGEF Domain Containing G1                                   | Protein coding | 33 | GC06P150599 | 0.638101101 | https://www.genecards.org/cgi-bin/carddisp.pl?gene=PLEKHG1  |
| CAMK2D   | Calcium/Calmodulin Dependent Protein Kinase II $\delta$                               | Protein coding | 49 | GC04M113418 | 0.636919916 | https://www.genecards.org/cgi-bin/carddisp.pl?gene=CAMK2D   |
| VGLL4    | Vestigial Like Family Member 4                                                        | Protein coding | 36 | GC03M011615 | 0.636919916 | https://www.genecards.org/cgi-bin/carddisp.pl?gene=VGLL4    |
| PPP2CA   | Protein Phosphatase 2 Catalytic Subunit $\alpha$                                      | Protein coding | 49 | GC05M134194 | 0.63683784  | https://www.genecards.org/cgi-bin/carddisp.pl?gene=PPP2CA   |
| MSI1     | Musashi RNA Binding Protein 1                                                         | Protein coding | 40 | GC12M120341 | 0.634989023 | https://www.genecards.org/cgi-bin/carddisp.pl?gene=MSI1     |
| FTH1     | Ferritin Heavy Chain 1                                                                | Protein coding | 50 | GC11M061959 | 0.632112205 | https://www.genecards.org/cgi-bin/carddisp.pl?gene=FTH1     |
| SPTBN2   | Spectrin $\beta$ , Non-Erythrocytic 2                                                 | Protein coding | 42 | GC11M071804 | 0.632112205 | https://www.genecards.org/cgi-bin/carddisp.pl?gene=SPTBN2   |
| MYOZ2    | Myozenin 2                                                                            | Protein coding | 38 | GC04P119135 | 0.632112205 | https://www.genecards.org/cgi-bin/carddisp.pl?gene=MYOZ2    |
| UCN2     | Urocortin 2                                                                           | Protein coding | 34 | GC03M048561 | 0.632112205 | https://www.genecards.org/cgi-bin/carddisp.pl?gene=UCN2     |
| C1QTNF9  | C1q And TNF Related 9                                                                 | Protein coding | 33 | GC13P024307 | 0.632112205 | https://www.genecards.org/cgi-bin/carddisp.pl?gene=C1QTNF9  |
| ITPKC    | Inositol-Trisphosphate 3-Kinase C                                                     | Protein coding | 44 | GC19P041715 | 0.625694096 | https://www.genecards.org/cgi-bin/carddisp.pl?gene=ITPKC    |
| GNPTAB   | N-Acetylglucosamine-1-Phosphate Transferase Subunits $\alpha$ And $\beta$             | Protein coding | 41 | GC12M101745 | 0.625694096 | https://www.genecards.org/cgi-bin/carddisp.pl?gene=GNPTAB   |
| GCM2     | Glial Cells Missing Transcription Factor 2                                            | Protein coding | 41 | GC06M010873 | 0.625694096 | https://www.genecards.org/cgi-bin/carddisp.pl?gene=GCM2     |
| NRG2     | Neuregulin 2                                                                          | Protein coding | 41 | GC05M139810 | 0.625694096 | https://www.genecards.org/cgi-bin/carddisp.pl?gene=NRG2     |
| PARL     | Presenilin Associated Rhomboid Like                                                   | Protein coding | 41 | GC03M183826 | 0.625694096 | https://www.genecards.org/cgi-bin/carddisp.pl?gene=PARL     |
| DGCR2    | DiGeorge Syndrome Critical Region Gene 2                                              | Protein coding | 39 | GC22M019037 | 0.625694096 | https://www.genecards.org/cgi-bin/carddisp.pl?gene=DGCR2    |
| ELP4     | Elongator Acetyltransferase Complex Subunit 4                                         | Protein coding | 39 | GC11P031509 | 0.625694096 | https://www.genecards.org/cgi-bin/carddisp.pl?gene=ELP4     |
| OPA3     | Outer Mitochondrial Membrane Lipid Metabolism Regulator OPA3                          | Protein coding | 39 | GC19M045527 | 0.625694096 | https://www.genecards.org/cgi-bin/carddisp.pl?gene=OPA3     |
| TOMM20   | Translocase Of Outer Mitochondrial Membrane 20                                        | Protein coding | 39 | GC01M235109 | 0.625694096 | https://www.genecards.org/cgi-bin/carddisp.pl?gene=TOMM20   |
| DR1      | Down-Regulator Of Transcription 1                                                     | Protein coding | 38 | GC01P093345 | 0.625694096 | https://www.genecards.org/cgi-bin/carddisp.pl?gene=DR1      |
| SLC25A46 | Solute Carrier Family 25 Member 46                                                    | Protein coding | 38 | GC05P110738 | 0.625694096 | https://www.genecards.org/cgi-bin/carddisp.pl?gene=SLC25A46 |
| DENR     | Density Regulated Re-Initiation And Release Factor                                    | Protein coding | 37 | GC12P122752 | 0.625694096 | https://www.genecards.org/cgi-bin/carddisp.pl?gene=DENR     |
| ZNF274   | Zinc Finger Protein 274                                                               | Protein coding | 36 | GC19P058182 | 0.625694096 | https://www.genecards.org/cgi-bin/carddisp.pl?gene=ZNF274   |
| ZNF2     | Zinc Finger Protein 2                                                                 | Protein coding | 35 | GC02P095165 | 0.625694096 | https://www.genecards.org/cgi-bin/carddisp.pl?gene=ZNF2     |
| CDR2L    | Cerebellar Degeneration Related Protein 2 Like                                        | Protein coding | 30 | GC17P074987 | 0.625694096 | https://www.genecards.org/cgi-bin/carddisp.pl?gene=CDR2L    |
| THBS2    | Thrombospondin 2                                                                      | Protein coding | 45 | GC06M169215 | 0.622166991 | https://www.genecards.org/cgi-bin/carddisp.pl?gene=THBS2    |
| OGN      | Osteoglycin                                                                           | Protein coding | 40 | GC09M092383 | 0.621701598 | https://www.genecards.org/cgi-bin/carddisp.pl?gene=OGN      |
| CMYA5    | Cardiomyopathy Associated 5                                                           | Protein coding | 33 | GC05P079689 | 0.621701598 | https://www.genecards.org/cgi-bin/carddisp.pl?gene=CMYA5    |
| GABBR2   | $\gamma$ -Aminobutyric Acid Type B Receptor Subunit 2                                 | Protein coding | 48 | GC09M098288 | 0.620348454 | https://www.genecards.org/cgi-bin/carddisp.pl?gene=GABBR2   |
| LRG1     | Leucine Rich $\alpha$ -2-Glycoprotein 1                                               | Protein coding | 38 | GC19M004546 | 0.620348454 | https://www.genecards.org/cgi-bin/carddisp.pl?gene=LRG1     |
| TERF2    | Telomeric Repeat Binding Factor 2                                                     | Protein coding | 40 | GC16M069355 | 0.616304874 | https://www.genecards.org/cgi-bin/carddisp.pl?gene=TERF2    |
| RPS6KB1  | Ribosomal Protein S6 Kinase B1                                                        | Protein coding | 49 | GC17P059893 | 0.615880311 | https://www.genecards.org/cgi-bin/carddisp.pl?gene=RPS6KB1  |
| MIR486-1 | MicroRNA 486-1                                                                        | RNA gene       | 17 | GC08M041660 | 0.615880311 | https://www.genecards.org/cgi-bin/carddisp.pl?gene=MIR486-1 |
| PARP2    | Poly(ADP-Ribose) Polymerase 2                                                         | Protein coding | 45 | GC14P020343 | 0.615827143 | https://www.genecards.org/cgi-bin/carddisp.pl?gene=PARP2    |
| PARP4    | Poly(ADP-Ribose) Polymerase Family Member 4                                           | Protein coding | 43 | GC13M024420 | 0.615827143 | https://www.genecards.org/cgi-bin/carddisp.pl?gene=PARP4    |
| SLC9A2   | Solute Carrier Family 9 Member A2                                                     | Protein coding | 41 | GC02P102620 | 0.615827143 | https://www.genecards.org/cgi-bin/carddisp.pl?gene=SLC9A2   |
| PARP3    | Poly(ADP-Ribose) Polymerase Family Member 3                                           | Protein coding | 39 | GC03P052065 | 0.615827143 | https://www.genecards.org/cgi-bin/carddisp.pl?gene=PARP3    |
| GBA3     | Glucosylceramidase $\beta$ 3 (Gene/Pseudogene)                                        | Protein coding | 35 | GC04P022694 | 0.615827143 | https://www.genecards.org/cgi-bin/carddisp.pl?gene=GBA3     |
| ITGB8    | Integrin Subunit $\beta$ 8                                                            | Protein coding | 41 | GC07P020329 | 0.612431824 | https://www.genecards.org/cgi-bin/carddisp.pl?gene=ITGB8    |
| TNXA     | Tenascin XA (Pseudogene)                                                              | Pseudogene     | 22 | GC06M049139 | 0.606614888 | https://www.genecards.org/cgi-bin/carddisp.pl?gene=TNXA     |

|           |                                                                 |                |    |             |             |                                                                                                                                         |
|-----------|-----------------------------------------------------------------|----------------|----|-------------|-------------|-----------------------------------------------------------------------------------------------------------------------------------------|
| HIF1AN    | Hypoxia Inducible Factor 1 Subunit $\alpha$ Inhibitor           | Protein coding | 44 | GC10P100529 | 0.606553793 | <a href="https://www.genecards.org/cgi-bin/carddisp.pl?gene=HIF1AN">https://www.genecards.org/cgi-bin/carddisp.pl?gene=HIF1AN</a>       |
| CDH1      | Cadherin 1                                                      | Protein coding | 50 | GC16P068737 | 0.605163574 | <a href="https://www.genecards.org/cgi-bin/carddisp.pl?gene=CDH1">https://www.genecards.org/cgi-bin/carddisp.pl?gene=CDH1</a>           |
| NPAS4     | Neuronal PAS Domain Protein 4                                   | Protein coding | 36 | GC11P066924 | 0.605083346 | <a href="https://www.genecards.org/cgi-bin/carddisp.pl?gene=NPAS4">https://www.genecards.org/cgi-bin/carddisp.pl?gene=NPAS4</a>         |
| TERF1     | Telomeric Repeat Binding Factor 1                               | Protein coding | 42 | GC08P073003 | 0.603420973 | <a href="https://www.genecards.org/cgi-bin/carddisp.pl?gene=TERF1">https://www.genecards.org/cgi-bin/carddisp.pl?gene=TERF1</a>         |
| ESRRA     | Estrogen Related Receptor $\alpha$                              | Protein coding | 48 | GC11P064305 | 0.60088259  | <a href="https://www.genecards.org/cgi-bin/carddisp.pl?gene=ESRRA">https://www.genecards.org/cgi-bin/carddisp.pl?gene=ESRRA</a>         |
| TP63      | Tumor Protein P63                                               | Protein coding | 48 | GC03P189598 | 0.599191487 | <a href="https://www.genecards.org/cgi-bin/carddisp.pl?gene=TP63">https://www.genecards.org/cgi-bin/carddisp.pl?gene=TP63</a>           |
| PLSCR3    | Phospholipid Scramblase 3                                       | Protein coding | 37 | GC17M007389 | 0.599191487 | <a href="https://www.genecards.org/cgi-bin/carddisp.pl?gene=PLSCR3">https://www.genecards.org/cgi-bin/carddisp.pl?gene=PLSCR3</a>       |
| TATDN1    | TatD DNase Domain Containing 1                                  | Protein coding | 35 | GC08M124488 | 0.599191487 | <a href="https://www.genecards.org/cgi-bin/carddisp.pl?gene=TATDN1">https://www.genecards.org/cgi-bin/carddisp.pl?gene=TATDN1</a>       |
| MRPL52    | Mitochondrial Ribosomal Protein L52                             | Protein coding | 32 | GC14P022829 | 0.599191487 | <a href="https://www.genecards.org/cgi-bin/carddisp.pl?gene=MRPL52">https://www.genecards.org/cgi-bin/carddisp.pl?gene=MRPL52</a>       |
| EMILIN3   | Elastin Microfibril Interfacer 3                                | Protein coding | 30 | GC20M041359 | 0.599191487 | <a href="https://www.genecards.org/cgi-bin/carddisp.pl?gene=EMILIN3">https://www.genecards.org/cgi-bin/carddisp.pl?gene=EMILIN3</a>     |
| FGF13     | Fibroblast Growth Factor 13                                     | Protein coding | 43 | GC0XM138615 | 0.599153757 | <a href="https://www.genecards.org/cgi-bin/carddisp.pl?gene=FGF13">https://www.genecards.org/cgi-bin/carddisp.pl?gene=FGF13</a>         |
| AKT3      | AKT Serine/Threonine Kinase 3                                   | Protein coding | 53 | GC01M243488 | 0.598204553 | <a href="https://www.genecards.org/cgi-bin/carddisp.pl?gene=AKT3">https://www.genecards.org/cgi-bin/carddisp.pl?gene=AKT3</a>           |
| ANXA2     | Annexin A2                                                      | Protein coding | 48 | GC15M060347 | 0.598204553 | <a href="https://www.genecards.org/cgi-bin/carddisp.pl?gene=ANXA2">https://www.genecards.org/cgi-bin/carddisp.pl?gene=ANXA2</a>         |
| DSG2      | Desmoglein 2                                                    | Protein coding | 46 | GC18P031498 | 0.598204553 | <a href="https://www.genecards.org/cgi-bin/carddisp.pl?gene=DSG2">https://www.genecards.org/cgi-bin/carddisp.pl?gene=DSG2</a>           |
| CSF2RA    | Colony Stimulating Factor 2 Receptor Subunit $\alpha$           | Protein coding | 45 | GC0XP001349 | 0.596601725 | <a href="https://www.genecards.org/cgi-bin/carddisp.pl?gene=CSF2RA">https://www.genecards.org/cgi-bin/carddisp.pl?gene=CSF2RA</a>       |
| ACD       | ACD Shelterin Complex Subunit And Telomerase Recruitment Factor | Protein coding | 44 | GC16M067658 | 0.590023041 | <a href="https://www.genecards.org/cgi-bin/carddisp.pl?gene=ACD">https://www.genecards.org/cgi-bin/carddisp.pl?gene=ACD</a>             |
| POT1      | Protection Of Telomeres 1                                       | Protein coding | 43 | GC07M124822 | 0.590023041 | <a href="https://www.genecards.org/cgi-bin/carddisp.pl?gene=POT1">https://www.genecards.org/cgi-bin/carddisp.pl?gene=POT1</a>           |
| TERF2IP   | TERF2 Interacting Protein                                       | Protein coding | 43 | GC16P075647 | 0.590023041 | <a href="https://www.genecards.org/cgi-bin/carddisp.pl?gene=TERF2IP">https://www.genecards.org/cgi-bin/carddisp.pl?gene=TERF2IP</a>     |
| TEP1      | Telomerase Associated Protein 1                                 | Protein coding | 40 | GC14M020365 | 0.590023041 | <a href="https://www.genecards.org/cgi-bin/carddisp.pl?gene=TEP1">https://www.genecards.org/cgi-bin/carddisp.pl?gene=TEP1</a>           |
| PAFAH2    | Platelet Activating Factor Acetylhydrolase 2                    | Protein coding | 38 | GC01M025971 | 0.589152992 | <a href="https://www.genecards.org/cgi-bin/carddisp.pl?gene=PAFAH2">https://www.genecards.org/cgi-bin/carddisp.pl?gene=PAFAH2</a>       |
| MAP2K1    | Mitogen-Activated Protein Kinase Kinase 1                       | Protein coding | 54 | GC15P066386 | 0.588674128 | <a href="https://www.genecards.org/cgi-bin/carddisp.pl?gene=MAP2K1">https://www.genecards.org/cgi-bin/carddisp.pl?gene=MAP2K1</a>       |
| EFNB1     | Ephrin B1                                                       | Protein coding | 46 | GC0XP068828 | 0.586557567 | <a href="https://www.genecards.org/cgi-bin/carddisp.pl?gene=EFNB1">https://www.genecards.org/cgi-bin/carddisp.pl?gene=EFNB1</a>         |
| DIABLO    | Diablo IAP-Binding Mitochondrial Protein                        | Protein coding | 47 | GC12M122208 | 0.586211801 | <a href="https://www.genecards.org/cgi-bin/carddisp.pl?gene=DIABLO">https://www.genecards.org/cgi-bin/carddisp.pl?gene=DIABLO</a>       |
| RAF1      | Raf-1 Proto-Oncogene, Serine/Threonine Kinase                   | Protein coding | 54 | GC03M012583 | 0.585501313 | <a href="https://www.genecards.org/cgi-bin/carddisp.pl?gene=RAF1">https://www.genecards.org/cgi-bin/carddisp.pl?gene=RAF1</a>           |
| SHC1      | SHC Adaptor Protein 1                                           | Protein coding | 45 | GC01M154962 | 0.584393203 | <a href="https://www.genecards.org/cgi-bin/carddisp.pl?gene=SHC1">https://www.genecards.org/cgi-bin/carddisp.pl?gene=SHC1</a>           |
| FABP5     | Fatty Acid Binding Protein 5                                    | Protein coding | 41 | GC08P081282 | 0.584393203 | <a href="https://www.genecards.org/cgi-bin/carddisp.pl?gene=FABP5">https://www.genecards.org/cgi-bin/carddisp.pl?gene=FABP5</a>         |
| CARD16    | Caspase Recruitment Domain Family Member 16                     | Protein coding | 36 | GC11M105041 | 0.584140658 | <a href="https://www.genecards.org/cgi-bin/carddisp.pl?gene=CARD16">https://www.genecards.org/cgi-bin/carddisp.pl?gene=CARD16</a>       |
| CIDEA     | Cell Death Inducing DFFA Like Effector A                        | Protein coding | 41 | GC18P012254 | 0.583491027 | <a href="https://www.genecards.org/cgi-bin/carddisp.pl?gene=CIDEA">https://www.genecards.org/cgi-bin/carddisp.pl?gene=CIDEA</a>         |
| ELAVL3    | ELAV Like RNA Binding Protein 3                                 | Protein coding | 37 | GC19M011451 | 0.583491027 | <a href="https://www.genecards.org/cgi-bin/carddisp.pl?gene=ELAVL3">https://www.genecards.org/cgi-bin/carddisp.pl?gene=ELAVL3</a>       |
| TRIM72    | Tripartite Motif Containing 72                                  | Protein coding | 36 | GC16P033522 | 0.583491027 | <a href="https://www.genecards.org/cgi-bin/carddisp.pl?gene=TRIM72">https://www.genecards.org/cgi-bin/carddisp.pl?gene=TRIM72</a>       |
| SLC23A2   | Solute Carrier Family 23 Member 2                               | Protein coding | 42 | GC20M004852 | 0.583481789 | <a href="https://www.genecards.org/cgi-bin/carddisp.pl?gene=SLC23A2">https://www.genecards.org/cgi-bin/carddisp.pl?gene=SLC23A2</a>     |
| ITGA7     | Integrin Subunit $\alpha$ 7                                     | Protein coding | 47 | GC12M055684 | 0.580565214 | <a href="https://www.genecards.org/cgi-bin/carddisp.pl?gene=ITGA7">https://www.genecards.org/cgi-bin/carddisp.pl?gene=ITGA7</a>         |
| TRAF2     | TNF Receptor Associated Factor 2                                | Protein coding | 45 | GC09P136881 | 0.579210103 | <a href="https://www.genecards.org/cgi-bin/carddisp.pl?gene=TRAF2">https://www.genecards.org/cgi-bin/carddisp.pl?gene=TRAF2</a>         |
| ESRRG     | Estrogen Related Receptor $\gamma$                              | Protein coding | 45 | GC01M216503 | 0.579013944 | <a href="https://www.genecards.org/cgi-bin/carddisp.pl?gene=ESRRG">https://www.genecards.org/cgi-bin/carddisp.pl?gene=ESRRG</a>         |
| MIR485    | MicroRNA 485                                                    | RNA gene       | 18 | GC14P106822 | 0.576476574 | <a href="https://www.genecards.org/cgi-bin/carddisp.pl?gene=MIR485">https://www.genecards.org/cgi-bin/carddisp.pl?gene=MIR485</a>       |
| IRAK4     | Interleukin 1 Receptor Associated Kinase 4                      | Protein coding | 48 | GC12P043758 | 0.573342741 | <a href="https://www.genecards.org/cgi-bin/carddisp.pl?gene=IRAK4">https://www.genecards.org/cgi-bin/carddisp.pl?gene=IRAK4</a>         |
| TJP2      | Tight Junction Protein 2                                        | Protein coding | 46 | GC09P069121 | 0.573342741 | <a href="https://www.genecards.org/cgi-bin/carddisp.pl?gene=TJP2">https://www.genecards.org/cgi-bin/carddisp.pl?gene=TJP2</a>           |
| POU5F1    | POU Class 5 Homeobox 1                                          | Protein coding | 46 | GC06M049067 | 0.572896957 | <a href="https://www.genecards.org/cgi-bin/carddisp.pl?gene=POU5F1">https://www.genecards.org/cgi-bin/carddisp.pl?gene=POU5F1</a>       |
| CYGB      | Cytoglobin                                                      | Protein coding | 38 | GC17M076527 | 0.57286346  | <a href="https://www.genecards.org/cgi-bin/carddisp.pl?gene=CYGB">https://www.genecards.org/cgi-bin/carddisp.pl?gene=CYGB</a>           |
| FAH       | Fumarylacetoacetate Hydrolase                                   | Protein coding | 47 | GC15P080152 | 0.568496406 | <a href="https://www.genecards.org/cgi-bin/carddisp.pl?gene=FAH">https://www.genecards.org/cgi-bin/carddisp.pl?gene=FAH</a>             |
| PDE11A    | Phosphodiesterase 11A                                           | Protein coding | 47 | GC02M177624 | 0.564893901 | <a href="https://www.genecards.org/cgi-bin/carddisp.pl?gene=PDE11A">https://www.genecards.org/cgi-bin/carddisp.pl?gene=PDE11A</a>       |
| SNHG12    | Small Nucleolar RNA Host Gene 12                                | RNA gene       | 22 | GC01M028578 | 0.564893901 | <a href="https://www.genecards.org/cgi-bin/carddisp.pl?gene=SNHG12">https://www.genecards.org/cgi-bin/carddisp.pl?gene=SNHG12</a>       |
| OPRL1     | Opioid Related Nociceptin Receptor 1                            | Protein coding | 46 | GC20P064080 | 0.564268112 | <a href="https://www.genecards.org/cgi-bin/carddisp.pl?gene=OPRL1">https://www.genecards.org/cgi-bin/carddisp.pl?gene=OPRL1</a>         |
| MSR1      | Macrophage Scavenger Receptor 1                                 | Protein coding | 45 | GC08M016107 | 0.564268112 | <a href="https://www.genecards.org/cgi-bin/carddisp.pl?gene=MSR1">https://www.genecards.org/cgi-bin/carddisp.pl?gene=MSR1</a>           |
| CPE       | Carboxypeptidase E                                              | Protein coding | 44 | GC04P165361 | 0.564268112 | <a href="https://www.genecards.org/cgi-bin/carddisp.pl?gene=CPE">https://www.genecards.org/cgi-bin/carddisp.pl?gene=CPE</a>             |
| SERPINB2  | Serpin Family B Member 2                                        | Protein coding | 43 | GC18P063871 | 0.564268112 | <a href="https://www.genecards.org/cgi-bin/carddisp.pl?gene=SERPINB2">https://www.genecards.org/cgi-bin/carddisp.pl?gene=SERPINB2</a>   |
| PIGF      | Phosphatidylinositol Glycan Anchor Biosynthesis Class F         | Protein coding | 40 | GC02M046580 | 0.564268112 | <a href="https://www.genecards.org/cgi-bin/carddisp.pl?gene=PIGF">https://www.genecards.org/cgi-bin/carddisp.pl?gene=PIGF</a>           |
| NOS1AP    | Nitric Oxide Synthase 1 Adaptor Protein                         | Protein coding | 39 | GC01P162069 | 0.564268112 | <a href="https://www.genecards.org/cgi-bin/carddisp.pl?gene=NOS1AP">https://www.genecards.org/cgi-bin/carddisp.pl?gene=NOS1AP</a>       |
| PAPPA2    | Pappalysin 2                                                    | Protein coding | 37 | GC01P176463 | 0.564268112 | <a href="https://www.genecards.org/cgi-bin/carddisp.pl?gene=PAPPA2">https://www.genecards.org/cgi-bin/carddisp.pl?gene=PAPPA2</a>       |
| MIRLET7F1 | MicroRNA Let-7f-1                                               | RNA gene       | 19 | GC09P094193 | 0.563137054 | <a href="https://www.genecards.org/cgi-bin/carddisp.pl?gene=MIRLET7F1">https://www.genecards.org/cgi-bin/carddisp.pl?gene=MIRLET7F1</a> |
| INPPL1    | Inositol Polyphosphate Phosphatase Like 1                       | Protein coding | 50 | GC11P072223 | 0.560476124 | <a href="https://www.genecards.org/cgi-bin/carddisp.pl?gene=INPPL1">https://www.genecards.org/cgi-bin/carddisp.pl?gene=INPPL1</a>       |
| PTPN2     | Protein Tyrosine Phosphatase Non-Receptor Type 2                | Protein coding | 47 | GC18M019720 | 0.560476124 | <a href="https://www.genecards.org/cgi-bin/carddisp.pl?gene=PTPN2">https://www.genecards.org/cgi-bin/carddisp.pl?gene=PTPN2</a>         |
| ASAHI     | N-Acylsphingosine Amidohydrolase 1                              | Protein coding | 46 | GC08M018055 | 0.560476124 | <a href="https://www.genecards.org/cgi-bin/carddisp.pl?gene=ASAHI">https://www.genecards.org/cgi-bin/carddisp.pl?gene=ASAHI</a>         |
| AGRN      | Agrin                                                           | Protein coding | 44 | GC01P001020 | 0.560476124 | <a href="https://www.genecards.org/cgi-bin/carddisp.pl?gene=AGRN">https://www.genecards.org/cgi-bin/carddisp.pl?gene=AGRN</a>           |
| NRF1      | Nuclear Respiratory Factor 1                                    | Protein coding | 43 | GC07P129611 | 0.560476124 | <a href="https://www.genecards.org/cgi-bin/carddisp.pl?gene=NRF1">https://www.genecards.org/cgi-bin/carddisp.pl?gene=NRF1</a>           |
| TCAP      | Titin-Cap                                                       | Protein coding | 43 | GC17P039673 | 0.560476124 | <a href="https://www.genecards.org/cgi-bin/carddisp.pl?gene=TCAP">https://www.genecards.org/cgi-bin/carddisp.pl?gene=TCAP</a>           |
| PNPLA3    | Patatin Like Phospholipase Domain Containing 3                  | Protein coding | 40 | GC22P043923 | 0.560476124 | <a href="https://www.genecards.org/cgi-bin/carddisp.pl?gene=PNPLA3">https://www.genecards.org/cgi-bin/carddisp.pl?gene=PNPLA3</a>       |
| PMS1      | PMS1 Homolog 1, Mismatch Repair System Component                | Protein coding | 41 | GC02P189784 | 0.549757302 | <a href="https://www.genecards.org/cgi-bin/carddisp.pl?gene=PMS1">https://www.genecards.org/cgi-bin/carddisp.pl?gene=PMS1</a>           |
| CHEK1     | Checkpoint Kinase 1                                             | Protein coding | 50 | GC11P125625 | 0.547526538 | <a href="https://www.genecards.org/cgi-bin/carddisp.pl?gene=CHEK1">https://www.genecards.org/cgi-bin/carddisp.pl?gene=CHEK1</a>         |
| BARD1     | BRCA1 Associated RING Domain 1                                  | Protein coding | 47 | GC02M214725 | 0.547308803 | <a href="https://www.genecards.org/cgi-bin/carddisp.pl?gene=BARD1">https://www.genecards.org/cgi-bin/carddisp.pl?gene=BARD1</a>         |
| PACC1     | Proton Activated Chloride Channel 1                             | Protein coding | 26 | GC01M212365 | 0.547308803 | <a href="https://www.genecards.org/cgi-bin/carddisp.pl?gene=PACC1">https://www.genecards.org/cgi-bin/carddisp.pl?gene=PACC1</a>         |
| ADAM10    | ADAM Metallopeptidase Domain 10                                 | Protein coding | 52 | GC15M058588 | 0.54575336  | <a href="https://www.genecards.org/cgi-bin/carddisp.pl?gene=ADAM10">https://www.genecards.org/cgi-bin/carddisp.pl?gene=ADAM10</a>       |
| HSPA9     | Heat Shock Protein Family A (Hsp70) Member 9                    | Protein coding | 47 | GC05M138554 | 0.54575336  | <a href="https://www.genecards.org/cgi-bin/carddisp.pl?gene=HSPA9">https://www.genecards.org/cgi-bin/carddisp.pl?gene=HSPA9</a>         |
| MIR532    | MicroRNA 532                                                    | RNA gene       | 16 | GC0XP050004 | 0.54575336  | <a href="https://www.genecards.org/cgi-bin/carddisp.pl?gene=MIR532">https://www.genecards.org/cgi-bin/carddisp.pl?gene=MIR532</a>       |
| MIR487B   | MicroRNA 487b                                                   | RNA gene       | 18 | GC14P106824 | 0.541634917 | <a href="https://www.genecards.org/cgi-bin/carddisp.pl?gene=MIR487B">https://www.genecards.org/cgi-bin/carddisp.pl?gene=MIR487B</a>     |
| SRF       | Serum Response Factor                                           | Protein coding | 41 | GC06P043171 | 0.539623678 | <a href="https://www.genecards.org/cgi-bin/carddisp.pl?gene=SRF">https://www.genecards.org/cgi-bin/carddisp.pl?gene=SRF</a>             |
| SLC4A7    | Solute Carrier Family 4 Member 7                                | Protein coding | 42 | GC03M027372 | 0.535547674 | <a href="https://www.genecards.org/cgi-bin/carddisp.pl?gene=SLC4A7">https://www.genecards.org/cgi-bin/carddisp.pl?gene=SLC4A7</a>       |
| ASIC2     | Acid Sensing Ion Channel Subunit 2                              | Protein coding | 39 | GC17M033013 | 0.535318017 | <a href="https://www.genecards.org/cgi-bin/carddisp.pl?gene=ASIC2">https://www.genecards.org/cgi-bin/carddisp.pl?gene=ASIC2</a>         |
| MIR15B    | MicroRNA 15b                                                    | RNA gene       | 19 | GC03P160404 | 0.535318017 | <a href="https://www.genecards.org/cgi-bin/carddisp.pl?gene=MIR15B">https://www.genecards.org/cgi-bin/carddisp.pl?gene=MIR15B</a>       |
| DSC2      | Desmocollin 2                                                   | Protein coding | 45 | GC18M031058 | 0.534897983 | <a href="https://www.genecards.org/cgi-bin/carddisp.pl?gene=DSC2">https://www.genecards.org/cgi-bin/carddisp.pl?gene=DSC2</a>           |
| LMAN1     | Lectin, Mannose Binding 1                                       | Protein coding | 45 | GC18M059327 | 0.53212297  | <a href="https://www.genecards.org/cgi-bin/carddisp.pl?gene=LMAN1">https://www.genecards.org/cgi-bin/carddisp.pl?gene=LMAN1</a>         |
| GSS       | Glutathione Synthetase                                          | Protein coding | 46 | GC20M034928 | 0.524742603 | <a href="https://www.genecards.org/cgi-bin/carddisp.pl?gene=GSS">https://www.genecards.org/cgi-bin/carddisp.pl?gene=GSS</a>             |
| ATP2A3    | ATPase Sarcoplasmic/Endoplasmic Reticulum Ca2+ Transporting 3   | Protein coding | 45 | GC17M003923 | 0.524742603 | <a href="https://www.genecards.org/cgi-bin/carddisp.pl?gene=ATP2A3">https://www.genecards.org/cgi-bin/carddisp.pl?gene=ATP2A3</a>       |
| PPP3CB    | Protein Phosphatase 3 Catalytic Subunit $\beta$                 | Protein coding | 45 | GC10M073436 | 0.524742603 | <a href="https://www.genecards.org/cgi-bin/carddisp.pl?gene=PPP3CB">https://www.genecards.org/cgi-bin/carddisp.pl?gene=PPP3CB</a>       |
| ABCC5     | ATP Binding Cassette Subfamily C Member 5                       | Protein coding | 43 | GC03M183919 | 0.519031882 | <a href="https://www.genecards.org/cgi-bin/carddisp.pl?gene=ABCC5">https://www.genecards.org/cgi-bin/carddisp.pl?gene=ABCC5</a>         |
| GSTA4     | Glutathione S-Transferase $\alpha$ 4                            | Protein coding | 44 | GC06M052977 | 0.517228901 | <a href="https://www.genecards.org/cgi-bin/carddisp.pl?gene=GSTA4">https://www.genecards.org/cgi-bin/carddisp.pl?gene=GSTA4</a>         |

|           |                                                             |                |    |             |             |                                                                                                                                         |
|-----------|-------------------------------------------------------------|----------------|----|-------------|-------------|-----------------------------------------------------------------------------------------------------------------------------------------|
| OIP5-AS1  | OIP5 Antisense RNA 1                                        | RNA gene       | 18 | GC15P041283 | 0.517228901 | <a href="https://www.genecards.org/cgi-bin/carddisp.pl?gene=OIP5-AS1">https://www.genecards.org/cgi-bin/carddisp.pl?gene=OIP5-AS1</a>   |
| BIRC3     | Baculoviral IAP Repeat Containing 3                         | Protein coding | 47 | GC11P102317 | 0.515469313 | <a href="https://www.genecards.org/cgi-bin/carddisp.pl?gene=BIRC3">https://www.genecards.org/cgi-bin/carddisp.pl?gene=BIRC3</a>         |
| ACSS2     | Acyl-CoA Synthetase Short Chain Family Member 2             | Protein coding | 44 | GC20P034873 | 0.515469313 | <a href="https://www.genecards.org/cgi-bin/carddisp.pl?gene=ACSS2">https://www.genecards.org/cgi-bin/carddisp.pl?gene=ACSS2</a>         |
| PDLIM1    | PDZ And LIM Domain 1                                        | Protein coding | 40 | GC10M095237 | 0.515469313 | <a href="https://www.genecards.org/cgi-bin/carddisp.pl?gene=PDLIM1">https://www.genecards.org/cgi-bin/carddisp.pl?gene=PDLIM1</a>       |
| ALDH9A1   | Aldehyde Dehydrogenase 9 Family Member A1                   | Protein coding | 41 | GC01M165671 | 0.515217662 | <a href="https://www.genecards.org/cgi-bin/carddisp.pl?gene=ALDH9A1">https://www.genecards.org/cgi-bin/carddisp.pl?gene=ALDH9A1</a>     |
| GLUD1     | Glutamate Dehydrogenase 1                                   | Protein coding | 50 | GC10M087050 | 0.514079034 | <a href="https://www.genecards.org/cgi-bin/carddisp.pl?gene=GLUD1">https://www.genecards.org/cgi-bin/carddisp.pl?gene=GLUD1</a>         |
| IL3RA     | Interleukin 3 Receptor Subunit $\alpha$                     | Protein coding | 42 | GC0XP001336 | 0.514079034 | <a href="https://www.genecards.org/cgi-bin/carddisp.pl?gene=IL3RA">https://www.genecards.org/cgi-bin/carddisp.pl?gene=IL3RA</a>         |
| MIR200A   | MicroRNA 200a                                               | RNA gene       | 22 | GC01P002223 | 0.514079034 | <a href="https://www.genecards.org/cgi-bin/carddisp.pl?gene=MIR200A">https://www.genecards.org/cgi-bin/carddisp.pl?gene=MIR200A</a>     |
| ZNF98     | Zinc Finger Protein 98                                      | Protein coding | 29 | GC19M022391 | 0.513802052 | <a href="https://www.genecards.org/cgi-bin/carddisp.pl?gene=ZNF98">https://www.genecards.org/cgi-bin/carddisp.pl?gene=ZNF98</a>         |
| MTRFR     | Mitochondrial Translation Release Factor In Rescue          | Protein coding | 29 | GC12P123233 | 0.51375711  | <a href="https://www.genecards.org/cgi-bin/carddisp.pl?gene=MTRFR">https://www.genecards.org/cgi-bin/carddisp.pl?gene=MTRFR</a>         |
| ACTN1     | Actinin $\alpha$ 1                                          | Protein coding | 50 | GC14M068874 | 0.513753295 | <a href="https://www.genecards.org/cgi-bin/carddisp.pl?gene=ACTN1">https://www.genecards.org/cgi-bin/carddisp.pl?gene=ACTN1</a>         |
| ACADM     | Acyl-CoA Dehydrogenase Medium Chain                         | Protein coding | 46 | GC01P075724 | 0.50979811  | <a href="https://www.genecards.org/cgi-bin/carddisp.pl?gene=ACADM">https://www.genecards.org/cgi-bin/carddisp.pl?gene=ACADM</a>         |
| EIF2S1    | Eukaryotic Translation Initiation Factor 2 Subunit $\alpha$ | Protein coding | 44 | GC14P067359 | 0.50979811  | <a href="https://www.genecards.org/cgi-bin/carddisp.pl?gene=EIF2S1">https://www.genecards.org/cgi-bin/carddisp.pl?gene=EIF2S1</a>       |
| FCN3      | Ficolin 3                                                   | Protein coding | 43 | GC01M027398 | 0.50979811  | <a href="https://www.genecards.org/cgi-bin/carddisp.pl?gene=FCN3">https://www.genecards.org/cgi-bin/carddisp.pl?gene=FCN3</a>           |
| MOV10     | Mov10 RISC Complex RNA Helicase                             | Protein coding | 40 | GC01P112673 | 0.509580374 | <a href="https://www.genecards.org/cgi-bin/carddisp.pl?gene=MOV10">https://www.genecards.org/cgi-bin/carddisp.pl?gene=MOV10</a>         |
| PGK1      | Phosphoglycerate Kinase 1                                   | Protein coding | 48 | GC0XP077949 | 0.503668427 | <a href="https://www.genecards.org/cgi-bin/carddisp.pl?gene=PGK1">https://www.genecards.org/cgi-bin/carddisp.pl?gene=PGK1</a>           |
| CYP2C18   | Cytochrome P450 Family 2 Subfamily C Member 18              | Protein coding | 44 | GC10P094684 | 0.503668427 | <a href="https://www.genecards.org/cgi-bin/carddisp.pl?gene=CYP2C18">https://www.genecards.org/cgi-bin/carddisp.pl?gene=CYP2C18</a>     |
| PPP1R15A  | Protein Phosphatase 1 Regulatory Subunit 15A                | Protein coding | 40 | GC19P048872 | 0.502277315 | <a href="https://www.genecards.org/cgi-bin/carddisp.pl?gene=PPP1R15A">https://www.genecards.org/cgi-bin/carddisp.pl?gene=PPP1R15A</a>   |
| SRR       | Serine Racemase                                             | Protein coding | 43 | GC17P002303 | 0.499387532 | <a href="https://www.genecards.org/cgi-bin/carddisp.pl?gene=SRR">https://www.genecards.org/cgi-bin/carddisp.pl?gene=SRR</a>             |
| CCND2     | Cyclin D2                                                   | Protein coding | 48 | GC12P013105 | 0.497589588 | <a href="https://www.genecards.org/cgi-bin/carddisp.pl?gene=CCND2">https://www.genecards.org/cgi-bin/carddisp.pl?gene=CCND2</a>         |
| FHL1      | Four And A Half LIM Domains 1                               | Protein coding | 46 | GC0XP136146 | 0.497589588 | <a href="https://www.genecards.org/cgi-bin/carddisp.pl?gene=FHL1">https://www.genecards.org/cgi-bin/carddisp.pl?gene=FHL1</a>           |
| CCR7      | C-C Motif Chemokine Receptor 7                              | Protein coding | 45 | GC17M040556 | 0.497589588 | <a href="https://www.genecards.org/cgi-bin/carddisp.pl?gene=CCR7">https://www.genecards.org/cgi-bin/carddisp.pl?gene=CCR7</a>           |
| XRCC5     | X-Ray Repair Cross Complementing 5                          | Protein coding | 44 | GC02P216107 | 0.497589588 | <a href="https://www.genecards.org/cgi-bin/carddisp.pl?gene=XRCC5">https://www.genecards.org/cgi-bin/carddisp.pl?gene=XRCC5</a>         |
| ATG5      | Autophagy Related 5                                         | Protein coding | 43 | GC06M106045 | 0.497589588 | <a href="https://www.genecards.org/cgi-bin/carddisp.pl?gene=ATG5">https://www.genecards.org/cgi-bin/carddisp.pl?gene=ATG5</a>           |
| CRHR2     | Corticotropin Releasing Hormone Receptor 2                  | Protein coding | 43 | GC07M030651 | 0.497589588 | <a href="https://www.genecards.org/cgi-bin/carddisp.pl?gene=CRHR2">https://www.genecards.org/cgi-bin/carddisp.pl?gene=CRHR2</a>         |
| TTPA      | $\alpha$ Tocopherol Transfer Protein                        | Protein coding | 41 | GC08M063048 | 0.497589588 | <a href="https://www.genecards.org/cgi-bin/carddisp.pl?gene=TTPA">https://www.genecards.org/cgi-bin/carddisp.pl?gene=TTPA</a>           |
| RBM8A     | RNA Binding Motif Protein 8A                                | Protein coding | 40 | GC01M145921 | 0.497589588 | <a href="https://www.genecards.org/cgi-bin/carddisp.pl?gene=RBM8A">https://www.genecards.org/cgi-bin/carddisp.pl?gene=RBM8A</a>         |
| SYN2      | Synapsin II                                                 | Protein coding | 39 | GC03P012020 | 0.497589588 | <a href="https://www.genecards.org/cgi-bin/carddisp.pl?gene=SYN2">https://www.genecards.org/cgi-bin/carddisp.pl?gene=SYN2</a>           |
| TRAPPC10  | Trafficking Protein Particle Complex Subunit 10             | Protein coding | 38 | GC21P044012 | 0.497589588 | <a href="https://www.genecards.org/cgi-bin/carddisp.pl?gene=TRAPPC10">https://www.genecards.org/cgi-bin/carddisp.pl?gene=TRAPPC10</a>   |
| CGB3      | Chorionic Gonadotropin Subunit $\beta$ 3                    | Protein coding | 30 | GC19M049582 | 0.497589588 | <a href="https://www.genecards.org/cgi-bin/carddisp.pl?gene=CGB3">https://www.genecards.org/cgi-bin/carddisp.pl?gene=CGB3</a>           |
| MIR193A   | MicroRNA 193a                                               | RNA gene       | 18 | GC17P031559 | 0.497589588 | <a href="https://www.genecards.org/cgi-bin/carddisp.pl?gene=MIR193A">https://www.genecards.org/cgi-bin/carddisp.pl?gene=MIR193A</a>     |
| TPI1      | Triosephosphate Isomerase 1                                 | Protein coding | 47 | GC12P013180 | 0.492406487 | <a href="https://www.genecards.org/cgi-bin/carddisp.pl?gene=TPI1">https://www.genecards.org/cgi-bin/carddisp.pl?gene=TPI1</a>           |
| AMD1      | Adenosylmethionine Decarboxylase 1                          | Protein coding | 44 | GC06P110814 | 0.492406487 | <a href="https://www.genecards.org/cgi-bin/carddisp.pl?gene=AMD1">https://www.genecards.org/cgi-bin/carddisp.pl?gene=AMD1</a>           |
| KHSRP     | KH-Type Splicing Regulatory Protein                         | Protein coding | 42 | GC19M006413 | 0.492406487 | <a href="https://www.genecards.org/cgi-bin/carddisp.pl?gene=KHSRP">https://www.genecards.org/cgi-bin/carddisp.pl?gene=KHSRP</a>         |
| FTMT      | Ferritin Mitochondrial                                      | Protein coding | 38 | GC05P121851 | 0.492406487 | <a href="https://www.genecards.org/cgi-bin/carddisp.pl?gene=FTMT">https://www.genecards.org/cgi-bin/carddisp.pl?gene=FTMT</a>           |
| EEF2      | Eukaryotic Translation Elongation Factor 2                  | Protein coding | 48 | GC19M003976 | 0.489672989 | <a href="https://www.genecards.org/cgi-bin/carddisp.pl?gene=EEF2">https://www.genecards.org/cgi-bin/carddisp.pl?gene=EEF2</a>           |
| COL18A1   | Collagen Type XVIII $\alpha$ 1 Chain                        | Protein coding | 44 | GC21P045405 | 0.489639491 | <a href="https://www.genecards.org/cgi-bin/carddisp.pl?gene=COL18A1">https://www.genecards.org/cgi-bin/carddisp.pl?gene=COL18A1</a>     |
| SEN2      | SUMO Specific Peptidase 2                                   | Protein coding | 40 | GC03P185582 | 0.489639491 | <a href="https://www.genecards.org/cgi-bin/carddisp.pl?gene=SEN2">https://www.genecards.org/cgi-bin/carddisp.pl?gene=SEN2</a>           |
| SLC1A4    | Solute Carrier Family 1 Member 4                            | Protein coding | 44 | GC02P064988 | 0.486267567 | <a href="https://www.genecards.org/cgi-bin/carddisp.pl?gene=SLC1A4">https://www.genecards.org/cgi-bin/carddisp.pl?gene=SLC1A4</a>       |
| GRIN2C    | Glutamate Ionotropic Receptor NMDA Type Subunit 2C          | Protein coding | 45 | GC17M074842 | 0.479262412 | <a href="https://www.genecards.org/cgi-bin/carddisp.pl?gene=GRIN2C">https://www.genecards.org/cgi-bin/carddisp.pl?gene=GRIN2C</a>       |
| FBLN1     | Fibulin 1                                                   | Protein coding | 43 | GC22P045502 | 0.477801919 | <a href="https://www.genecards.org/cgi-bin/carddisp.pl?gene=FBLN1">https://www.genecards.org/cgi-bin/carddisp.pl?gene=FBLN1</a>         |
| PRG4      | Proteoglycan 4                                              | Protein coding | 40 | GC01P186296 | 0.477801919 | <a href="https://www.genecards.org/cgi-bin/carddisp.pl?gene=PRG4">https://www.genecards.org/cgi-bin/carddisp.pl?gene=PRG4</a>           |
| CCT8      | Chaperonin Containing TCP1 Subunit 8                        | Protein coding | 39 | GC21M029055 | 0.477801919 | <a href="https://www.genecards.org/cgi-bin/carddisp.pl?gene=CCT8">https://www.genecards.org/cgi-bin/carddisp.pl?gene=CCT8</a>           |
| S100A12   | S100 Calcium Binding Protein A12                            | Protein coding | 38 | GC01M153373 | 0.477801919 | <a href="https://www.genecards.org/cgi-bin/carddisp.pl?gene=S100A12">https://www.genecards.org/cgi-bin/carddisp.pl?gene=S100A12</a>     |
| LCORL     | Ligand Dependent Nuclear Receptor Corepressor Like          | Protein coding | 34 | GC04M017844 | 0.477801919 | <a href="https://www.genecards.org/cgi-bin/carddisp.pl?gene=LCORL">https://www.genecards.org/cgi-bin/carddisp.pl?gene=LCORL</a>         |
| COQ8B     | Coenzyme Q8B                                                | Protein coding | 32 | GC19M048448 | 0.477801919 | <a href="https://www.genecards.org/cgi-bin/carddisp.pl?gene=COQ8B">https://www.genecards.org/cgi-bin/carddisp.pl?gene=COQ8B</a>         |
| CDK2      | Cyclin Dependent Kinase 2                                   | Protein coding | 51 | GC12P055966 | 0.476128548 | <a href="https://www.genecards.org/cgi-bin/carddisp.pl?gene=CDK2">https://www.genecards.org/cgi-bin/carddisp.pl?gene=CDK2</a>           |
| CUL3      | Cullin 3                                                    | Protein coding | 47 | GC02M224470 | 0.476128548 | <a href="https://www.genecards.org/cgi-bin/carddisp.pl?gene=CUL3">https://www.genecards.org/cgi-bin/carddisp.pl?gene=CUL3</a>           |
| FHL2      | Four And A Half LIM Domains 2                               | Protein coding | 45 | GC02M105357 | 0.475682795 | <a href="https://www.genecards.org/cgi-bin/carddisp.pl?gene=FHL2">https://www.genecards.org/cgi-bin/carddisp.pl?gene=FHL2</a>           |
| CA3       | Carbonic Anhydrase 3                                        | Protein coding | 41 | GC08P085373 | 0.473327279 | <a href="https://www.genecards.org/cgi-bin/carddisp.pl?gene=CA3">https://www.genecards.org/cgi-bin/carddisp.pl?gene=CA3</a>             |
| GLI3      | GLI Family Zinc Finger 3                                    | Protein coding | 49 | GC07M041960 | 0.460722923 | <a href="https://www.genecards.org/cgi-bin/carddisp.pl?gene=GLI3">https://www.genecards.org/cgi-bin/carddisp.pl?gene=GLI3</a>           |
| RDX       | Radixin                                                     | Protein coding | 49 | GC11M109864 | 0.460722923 | <a href="https://www.genecards.org/cgi-bin/carddisp.pl?gene=RDX">https://www.genecards.org/cgi-bin/carddisp.pl?gene=RDX</a>             |
| MITF      | Melanocyte Inducing Transcription Factor                    | Protein coding | 48 | GC03P069788 | 0.460722923 | <a href="https://www.genecards.org/cgi-bin/carddisp.pl?gene=MITF">https://www.genecards.org/cgi-bin/carddisp.pl?gene=MITF</a>           |
| ALDH5A1   | Aldehyde Dehydrogenase 5 Family Member A1                   | Protein coding | 45 | GC06P024494 | 0.460722923 | <a href="https://www.genecards.org/cgi-bin/carddisp.pl?gene=ALDH5A1">https://www.genecards.org/cgi-bin/carddisp.pl?gene=ALDH5A1</a>     |
| CACNB3    | Calcium Voltage-Gated Channel Auxiliary Subunit $\beta$ 3   | Protein coding | 43 | GC12P048813 | 0.460722923 | <a href="https://www.genecards.org/cgi-bin/carddisp.pl?gene=CACNB3">https://www.genecards.org/cgi-bin/carddisp.pl?gene=CACNB3</a>       |
| CACNB1    | Calcium Voltage-Gated Channel Auxiliary Subunit $\beta$ 1   | Protein coding | 43 | GC17M039173 | 0.460722923 | <a href="https://www.genecards.org/cgi-bin/carddisp.pl?gene=CACNB1">https://www.genecards.org/cgi-bin/carddisp.pl?gene=CACNB1</a>       |
| UBQLN1    | Ubiquilin 1                                                 | Protein coding | 43 | GC09M083659 | 0.460722923 | <a href="https://www.genecards.org/cgi-bin/carddisp.pl?gene=UBQLN1">https://www.genecards.org/cgi-bin/carddisp.pl?gene=UBQLN1</a>       |
| SCNN1D    | Sodium Channel Epithelial 1 Subunit $\delta$                | Protein coding | 42 | GC01P001280 | 0.460722923 | <a href="https://www.genecards.org/cgi-bin/carddisp.pl?gene=SCNN1D">https://www.genecards.org/cgi-bin/carddisp.pl?gene=SCNN1D</a>       |
| VNN1      | Vanin 1                                                     | Protein coding | 43 | GC06M132680 | 0.460689425 | <a href="https://www.genecards.org/cgi-bin/carddisp.pl?gene=VNN1">https://www.genecards.org/cgi-bin/carddisp.pl?gene=VNN1</a>           |
| ATP5PF    | ATP Synthase Peripheral Stalk Subunit F6                    | Protein coding | 32 | GC21M025777 | 0.457806408 | <a href="https://www.genecards.org/cgi-bin/carddisp.pl?gene=ATP5PF">https://www.genecards.org/cgi-bin/carddisp.pl?gene=ATP5PF</a>       |
| CLCN3     | Chloride Voltage-Gated Channel 3                            | Protein coding | 42 | GC04P169612 | 0.45368427  | <a href="https://www.genecards.org/cgi-bin/carddisp.pl?gene=CLCN3">https://www.genecards.org/cgi-bin/carddisp.pl?gene=CLCN3</a>         |
| MIRLET7F2 | MicroRNA Let-7f-2                                           | RNA gene       | 18 | GC0XM053605 | 0.45368427  | <a href="https://www.genecards.org/cgi-bin/carddisp.pl?gene=MIRLET7F2">https://www.genecards.org/cgi-bin/carddisp.pl?gene=MIRLET7F2</a> |
| SLC5A1    | Solute Carrier Family 5 Member 1                            | Protein coding | 50 | GC22P032043 | 0.450312376 | <a href="https://www.genecards.org/cgi-bin/carddisp.pl?gene=SLC5A1">https://www.genecards.org/cgi-bin/carddisp.pl?gene=SLC5A1</a>       |
| SLC22A5   | Solute Carrier Family 22 Member 5                           | Protein coding | 47 | GC05P132369 | 0.450312376 | <a href="https://www.genecards.org/cgi-bin/carddisp.pl?gene=SLC22A5">https://www.genecards.org/cgi-bin/carddisp.pl?gene=SLC22A5</a>     |
| DICER1    | Dicer 1, Ribonuclease III                                   | Protein coding | 48 | GC14M095086 | 0.448539138 | <a href="https://www.genecards.org/cgi-bin/carddisp.pl?gene=DICER1">https://www.genecards.org/cgi-bin/carddisp.pl?gene=DICER1</a>       |
| GPRC6A    | G Protein-Coupled Receptor Class C Group 6 Member A         | Protein coding | 39 | GC06M116793 | 0.448539138 | <a href="https://www.genecards.org/cgi-bin/carddisp.pl?gene=GPRC6A">https://www.genecards.org/cgi-bin/carddisp.pl?gene=GPRC6A</a>       |
| DGKQ      | Diacylglycerol Kinase $\theta$                              | Protein coding | 42 | GC04M000942 | 0.438366979 | <a href="https://www.genecards.org/cgi-bin/carddisp.pl?gene=DGKQ">https://www.genecards.org/cgi-bin/carddisp.pl?gene=DGKQ</a>           |
| FUT3      | Fucosyltransferase 3 (Lewis Blood Group)                    | Protein coding | 43 | GC19M005843 | 0.435735106 | <a href="https://www.genecards.org/cgi-bin/carddisp.pl?gene=FUT3">https://www.genecards.org/cgi-bin/carddisp.pl?gene=FUT3</a>           |
| LCT       | Lactase                                                     | Protein coding | 43 | GC02M135787 | 0.435735106 | <a href="https://www.genecards.org/cgi-bin/carddisp.pl?gene=LCT">https://www.genecards.org/cgi-bin/carddisp.pl?gene=LCT</a>             |
| APOBEC2   | Apolipoprotein B mRNA Editing Enzyme Catalytic Subunit 2    | Protein coding | 38 | GC06P041053 | 0.435735106 | <a href="https://www.genecards.org/cgi-bin/carddisp.pl?gene=APOBEC2">https://www.genecards.org/cgi-bin/carddisp.pl?gene=APOBEC2</a>     |
| MEPE      | Matrix Extracellular Phosphoglycoprotein                    | Protein coding | 35 | GC04P087821 | 0.435735106 | <a href="https://www.genecards.org/cgi-bin/carddisp.pl?gene=MEPE">https://www.genecards.org/cgi-bin/carddisp.pl?gene=MEPE</a>           |
| PTPRU     | Protein Tyrosine Phosphatase Receptor Type U                | Protein coding | 42 | GC01P029236 | 0.435598791 | <a href="https://www.genecards.org/cgi-bin/carddisp.pl?gene=PTPRU">https://www.genecards.org/cgi-bin/carddisp.pl?gene=PTPRU</a>         |
| DLGAP4    | DLG Associated Protein 4                                    | Protein coding | 38 | GC20P036308 | 0.435598791 | <a href="https://www.genecards.org/cgi-bin/carddisp.pl?gene=DLGAP4">https://www.genecards.org/cgi-bin/carddisp.pl?gene=DLGAP4</a>       |
| CABIN1    | Calcineurin Binding Protein 1                               | Protein coding | 41 | GC22P024011 | 0.428665698 | <a href="https://www.genecards.org/cgi-bin/carddisp.pl?gene=CABIN1">https://www.genecards.org/cgi-bin/carddisp.pl?gene=CABIN1</a>       |
| GOSR1     | Golgi SNAP Receptor Complex Member 1                        | Protein coding | 39 | GC17P030477 | 0.428665698 | <a href="https://www.genecards.org/cgi-bin/carddisp.pl?gene=GOSR1">https://www.genecards.org/cgi-bin/carddisp.pl?gene=GOSR1</a>         |
| SHOX      | Short Stature Homeobox                                      | Protein coding | 38 | GC0XP000624 | 0.428665698 | <a href="https://www.genecards.org/cgi-bin/carddisp.pl?gene=SHOX">https://www.genecards.org/cgi-bin/carddisp.pl?gene=SHOX</a>           |

|          |                                                                                    |                |    |             |             |                                                                                                                                       |
|----------|------------------------------------------------------------------------------------|----------------|----|-------------|-------------|---------------------------------------------------------------------------------------------------------------------------------------|
| ADGRL1   | Adhesion G Protein-Coupled Receptor L1                                             | Protein coding | 35 | GC19M014147 | 0.428665698 | <a href="https://www.genecards.org/cgi-bin/carddisp.pl?gene=ADGRL1">https://www.genecards.org/cgi-bin/carddisp.pl?gene=ADGRL1</a>     |
| MIR181C  | MicroRNA 181c                                                                      | RNA gene       | 20 | GC19P013891 | 0.424734235 | <a href="https://www.genecards.org/cgi-bin/carddisp.pl?gene=MIR181C">https://www.genecards.org/cgi-bin/carddisp.pl?gene=MIR181C</a>   |
| HDAC2    | Histone Deacetylase 2                                                              | Protein coding | 51 | GC06M113933 | 0.422994494 | <a href="https://www.genecards.org/cgi-bin/carddisp.pl?gene=HDAC2">https://www.genecards.org/cgi-bin/carddisp.pl?gene=HDAC2</a>       |
| DNM2     | Dynamin 2                                                                          | Protein coding | 50 | GC19P010718 | 0.422994494 | <a href="https://www.genecards.org/cgi-bin/carddisp.pl?gene=DNM2">https://www.genecards.org/cgi-bin/carddisp.pl?gene=DNM2</a>         |
| PBX1     | PBX Homeobox 1                                                                     | Protein coding | 49 | GC01P164524 | 0.422994494 | <a href="https://www.genecards.org/cgi-bin/carddisp.pl?gene=PBX1">https://www.genecards.org/cgi-bin/carddisp.pl?gene=PBX1</a>         |
| YWHAE    | Tyrosine 3-Monooxygenase/Tryptophan 5-Monooxygenase Activation Protein $\epsilon$  | Protein coding | 49 | GC17M001346 | 0.422994494 | <a href="https://www.genecards.org/cgi-bin/carddisp.pl?gene=YWHAE">https://www.genecards.org/cgi-bin/carddisp.pl?gene=YWHAE</a>       |
| GLB1     | Galactosidase $\beta$ 1                                                            | Protein coding | 48 | GC03M032963 | 0.422994494 | <a href="https://www.genecards.org/cgi-bin/carddisp.pl?gene=GLB1">https://www.genecards.org/cgi-bin/carddisp.pl?gene=GLB1</a>         |
| LAMB1    | Laminin Subunit $\beta$ 1                                                          | Protein coding | 48 | GC07M107923 | 0.422994494 | <a href="https://www.genecards.org/cgi-bin/carddisp.pl?gene=LAMB1">https://www.genecards.org/cgi-bin/carddisp.pl?gene=LAMB1</a>       |
| KCNJ6    | Potassium Inwardly Rectifying Channel Subfamily J Member 6                         | Protein coding | 47 | GC21M037607 | 0.422994494 | <a href="https://www.genecards.org/cgi-bin/carddisp.pl?gene=KCNJ6">https://www.genecards.org/cgi-bin/carddisp.pl?gene=KCNJ6</a>       |
| CACNA1F  | Calcium Voltage-Gated Channel Subunit $\alpha$ 1 F                                 | Protein coding | 45 | GC0XM049205 | 0.422994494 | <a href="https://www.genecards.org/cgi-bin/carddisp.pl?gene=CACNA1F">https://www.genecards.org/cgi-bin/carddisp.pl?gene=CACNA1F</a>   |
| ETFA     | Electron Transfer Flavoprotein Subunit $\alpha$                                    | Protein coding | 45 | GC15M076215 | 0.422994494 | <a href="https://www.genecards.org/cgi-bin/carddisp.pl?gene=ETFA">https://www.genecards.org/cgi-bin/carddisp.pl?gene=ETFA</a>         |
| ROBO1    | Roundabout Guidance Receptor 1                                                     | Protein coding | 45 | GC03M078597 | 0.422994494 | <a href="https://www.genecards.org/cgi-bin/carddisp.pl?gene=ROBO1">https://www.genecards.org/cgi-bin/carddisp.pl?gene=ROBO1</a>       |
| NPY2R    | Neuropeptide Y Receptor Y2                                                         | Protein coding | 44 | GC04P155173 | 0.422994494 | <a href="https://www.genecards.org/cgi-bin/carddisp.pl?gene=NPY2R">https://www.genecards.org/cgi-bin/carddisp.pl?gene=NPY2R</a>       |
| TDP1     | Tyrosyl-DNA Phosphodiesterase 1                                                    | Protein coding | 44 | GC14P089954 | 0.422994494 | <a href="https://www.genecards.org/cgi-bin/carddisp.pl?gene=TDP1">https://www.genecards.org/cgi-bin/carddisp.pl?gene=TDP1</a>         |
| RPS6     | Ribosomal Protein S6                                                               | Protein coding | 44 | GC09M019375 | 0.422994494 | <a href="https://www.genecards.org/cgi-bin/carddisp.pl?gene=RPS6">https://www.genecards.org/cgi-bin/carddisp.pl?gene=RPS6</a>         |
| CHRNE    | Cholinergic Receptor Nicotinic $\epsilon$ Subunit                                  | Protein coding | 43 | GC17M004897 | 0.422994494 | <a href="https://www.genecards.org/cgi-bin/carddisp.pl?gene=CHRNE">https://www.genecards.org/cgi-bin/carddisp.pl?gene=CHRNE</a>       |
| EEF1A1   | Eukaryotic Translation Elongation Factor 1 $\alpha$ 1                              | Protein coding | 43 | GC06M073515 | 0.422994494 | <a href="https://www.genecards.org/cgi-bin/carddisp.pl?gene=EEF1A1">https://www.genecards.org/cgi-bin/carddisp.pl?gene=EEF1A1</a>     |
| RGS4     | Regulator Of G Protein Signaling 4                                                 | Protein coding | 43 | GC01P163038 | 0.422994494 | <a href="https://www.genecards.org/cgi-bin/carddisp.pl?gene=RGS4">https://www.genecards.org/cgi-bin/carddisp.pl?gene=RGS4</a>         |
| ANKRD1   | Ankyrin Repeat Domain 1                                                            | Protein coding | 42 | GC10M090912 | 0.422994494 | <a href="https://www.genecards.org/cgi-bin/carddisp.pl?gene=ANKRD1">https://www.genecards.org/cgi-bin/carddisp.pl?gene=ANKRD1</a>     |
| PRKRA    | Protein Activator Of Interferon Induced Protein Kinase EIF2AK2                     | Protein coding | 42 | GC02M178431 | 0.422994494 | <a href="https://www.genecards.org/cgi-bin/carddisp.pl?gene=PRKRA">https://www.genecards.org/cgi-bin/carddisp.pl?gene=PRKRA</a>       |
| WWP1     | WW Domain Containing E3 Ubiquitin Protein Ligase 1                                 | Protein coding | 42 | GC08P086342 | 0.422994494 | <a href="https://www.genecards.org/cgi-bin/carddisp.pl?gene=WWP1">https://www.genecards.org/cgi-bin/carddisp.pl?gene=WWP1</a>         |
| RHD      | Rh Blood Group D Antigen                                                           | Protein coding | 41 | GC01P025272 | 0.422994494 | <a href="https://www.genecards.org/cgi-bin/carddisp.pl?gene=RHD">https://www.genecards.org/cgi-bin/carddisp.pl?gene=RHD</a>           |
| UPF1     | UPF1 RNA Helicase And ATPase                                                       | Protein coding | 41 | GC19P018831 | 0.422994494 | <a href="https://www.genecards.org/cgi-bin/carddisp.pl?gene=UPF1">https://www.genecards.org/cgi-bin/carddisp.pl?gene=UPF1</a>         |
| PLEK     | Pleckstrin                                                                         | Protein coding | 40 | GC02P068365 | 0.422994494 | <a href="https://www.genecards.org/cgi-bin/carddisp.pl?gene=PLEK">https://www.genecards.org/cgi-bin/carddisp.pl?gene=PLEK</a>         |
| DCAF17   | DDB1 And CUL4 Associated Factor 17                                                 | Protein coding | 36 | GC02P171434 | 0.422994494 | <a href="https://www.genecards.org/cgi-bin/carddisp.pl?gene=DCAF17">https://www.genecards.org/cgi-bin/carddisp.pl?gene=DCAF17</a>     |
| MIR455   | MicroRNA 455                                                                       | RNA gene       | 19 | GC09P114209 | 0.422994494 | <a href="https://www.genecards.org/cgi-bin/carddisp.pl?gene=MIR455">https://www.genecards.org/cgi-bin/carddisp.pl?gene=MIR455</a>     |
| VASH1    | Vasohibin 1                                                                        | Protein coding | 37 | GC14P076761 | 0.422960997 | <a href="https://www.genecards.org/cgi-bin/carddisp.pl?gene=VASH1">https://www.genecards.org/cgi-bin/carddisp.pl?gene=VASH1</a>       |
| BAG6     | BAG Cochaperone 6                                                                  | Protein coding | 36 | GC06M031639 | 0.422960997 | <a href="https://www.genecards.org/cgi-bin/carddisp.pl?gene=BAG6">https://www.genecards.org/cgi-bin/carddisp.pl?gene=BAG6</a>         |
| IFNE     | Interferon $\epsilon$                                                              | Protein coding | 34 | GC09M021480 | 0.422960997 | <a href="https://www.genecards.org/cgi-bin/carddisp.pl?gene=IFNE">https://www.genecards.org/cgi-bin/carddisp.pl?gene=IFNE</a>         |
| IFNGR1   | Interferon $\gamma$ Receptor 1                                                     | Protein coding | 49 | GC06M137197 | 0.416864842 | <a href="https://www.genecards.org/cgi-bin/carddisp.pl?gene=IFNGR1">https://www.genecards.org/cgi-bin/carddisp.pl?gene=IFNGR1</a>     |
| KRT7     | Keratin 7                                                                          | Protein coding | 42 | GC12P052232 | 0.416864842 | <a href="https://www.genecards.org/cgi-bin/carddisp.pl?gene=KRT7">https://www.genecards.org/cgi-bin/carddisp.pl?gene=KRT7</a>         |
| CD47     | CD47 Molecule                                                                      | Protein coding | 43 | GC03M108043 | 0.416295707 | <a href="https://www.genecards.org/cgi-bin/carddisp.pl?gene=CD47">https://www.genecards.org/cgi-bin/carddisp.pl?gene=CD47</a>         |
| RXRA     | Retinoid X Receptor $\alpha$                                                       | Protein coding | 50 | GC09P134317 | 0.412583917 | <a href="https://www.genecards.org/cgi-bin/carddisp.pl?gene=RXRA">https://www.genecards.org/cgi-bin/carddisp.pl?gene=RXRA</a>         |
| SLC29A3  | Solute Carrier Family 29 Member 3                                                  | Protein coding | 44 | GC10P071320 | 0.412583917 | <a href="https://www.genecards.org/cgi-bin/carddisp.pl?gene=SLC29A3">https://www.genecards.org/cgi-bin/carddisp.pl?gene=SLC29A3</a>   |
| IL12RB2  | Interleukin 12 Receptor Subunit $\beta$ 2                                          | Protein coding | 43 | GC01P067307 | 0.412583917 | <a href="https://www.genecards.org/cgi-bin/carddisp.pl?gene=IL12RB2">https://www.genecards.org/cgi-bin/carddisp.pl?gene=IL12RB2</a>   |
| POLR1C   | RNA Polymerase I And III Subunit C                                                 | Protein coding | 43 | GC06P058522 | 0.412583917 | <a href="https://www.genecards.org/cgi-bin/carddisp.pl?gene=POLR1C">https://www.genecards.org/cgi-bin/carddisp.pl?gene=POLR1C</a>     |
| RHOT1    | Ras Homolog Family Member T1                                                       | Protein coding | 43 | GC17P032142 | 0.412583917 | <a href="https://www.genecards.org/cgi-bin/carddisp.pl?gene=RHOT1">https://www.genecards.org/cgi-bin/carddisp.pl?gene=RHOT1</a>       |
| SLC17A6  | Solute Carrier Family 17 Member 6                                                  | Protein coding | 41 | GC11P022359 | 0.412583917 | <a href="https://www.genecards.org/cgi-bin/carddisp.pl?gene=SLC17A6">https://www.genecards.org/cgi-bin/carddisp.pl?gene=SLC17A6</a>   |
| SERPINE2 | Serpin Family E Member 2                                                           | Protein coding | 41 | GC02M223975 | 0.412583917 | <a href="https://www.genecards.org/cgi-bin/carddisp.pl?gene=SERPINE2">https://www.genecards.org/cgi-bin/carddisp.pl?gene=SERPINE2</a> |
| SLC17A7  | Solute Carrier Family 17 Member 7                                                  | Protein coding | 41 | GC19M049429 | 0.412583917 | <a href="https://www.genecards.org/cgi-bin/carddisp.pl?gene=SLC17A7">https://www.genecards.org/cgi-bin/carddisp.pl?gene=SLC17A7</a>   |
| AGO2     | Argonaute RISC Catalytic Component 2                                               | Protein coding | 40 | GC08M140522 | 0.412583917 | <a href="https://www.genecards.org/cgi-bin/carddisp.pl?gene=AGO2">https://www.genecards.org/cgi-bin/carddisp.pl?gene=AGO2</a>         |
| WBPI1    | WW Domain Binding Protein 1 Like                                                   | Protein coding | 32 | GC10P102743 | 0.412583917 | <a href="https://www.genecards.org/cgi-bin/carddisp.pl?gene=WBPI1">https://www.genecards.org/cgi-bin/carddisp.pl?gene=WBPI1</a>       |
| MIR139   | MicroRNA 139                                                                       | RNA gene       | 20 | GC11M072615 | 0.412583917 | <a href="https://www.genecards.org/cgi-bin/carddisp.pl?gene=MIR139">https://www.genecards.org/cgi-bin/carddisp.pl?gene=MIR139</a>     |
| MIR1306  | MicroRNA 1306                                                                      | RNA gene       | 18 | GC22P020086 | 0.412583917 | <a href="https://www.genecards.org/cgi-bin/carddisp.pl?gene=MIR1306">https://www.genecards.org/cgi-bin/carddisp.pl?gene=MIR1306</a>   |
| MIR497   | MicroRNA 497                                                                       | RNA gene       | 18 | GC17M007022 | 0.397769928 | <a href="https://www.genecards.org/cgi-bin/carddisp.pl?gene=MIR497">https://www.genecards.org/cgi-bin/carddisp.pl?gene=MIR497</a>     |
| ANXA1    | Annexin A1                                                                         | Protein coding | 48 | GC09P073151 | 0.396717787 | <a href="https://www.genecards.org/cgi-bin/carddisp.pl?gene=ANXA1">https://www.genecards.org/cgi-bin/carddisp.pl?gene=ANXA1</a>       |
| CHRM2    | Cholinergic Receptor Muscarinic 2                                                  | Protein coding | 48 | GC07P136868 | 0.392458797 | <a href="https://www.genecards.org/cgi-bin/carddisp.pl?gene=CHRM2">https://www.genecards.org/cgi-bin/carddisp.pl?gene=CHRM2</a>       |
| GLS      | Glutaminase                                                                        | Protein coding | 47 | GC02P190880 | 0.392458797 | <a href="https://www.genecards.org/cgi-bin/carddisp.pl?gene=GLS">https://www.genecards.org/cgi-bin/carddisp.pl?gene=GLS</a>           |
| MYOD1    | Myogenic Differentiation 1                                                         | Protein coding | 47 | GC11P017741 | 0.392458797 | <a href="https://www.genecards.org/cgi-bin/carddisp.pl?gene=MYOD1">https://www.genecards.org/cgi-bin/carddisp.pl?gene=MYOD1</a>       |
| PHB      | Prohibitin                                                                         | Protein coding | 47 | GC17M049404 | 0.392458797 | <a href="https://www.genecards.org/cgi-bin/carddisp.pl?gene=PHB">https://www.genecards.org/cgi-bin/carddisp.pl?gene=PHB</a>           |
| HTR6     | 5-Hydroxytryptamine Receptor 6                                                     | Protein coding | 43 | GC01P019666 | 0.392458797 | <a href="https://www.genecards.org/cgi-bin/carddisp.pl?gene=HTR6">https://www.genecards.org/cgi-bin/carddisp.pl?gene=HTR6</a>         |
| CCL21    | C-C Motif Chemokine Ligand 21                                                      | Protein coding | 42 | GC09M034709 | 0.392458797 | <a href="https://www.genecards.org/cgi-bin/carddisp.pl?gene=CCL21">https://www.genecards.org/cgi-bin/carddisp.pl?gene=CCL21</a>       |
| CYTL1    | Cytokine Like 1                                                                    | Protein coding | 33 | GC04M005016 | 0.392458797 | <a href="https://www.genecards.org/cgi-bin/carddisp.pl?gene=CYTL1">https://www.genecards.org/cgi-bin/carddisp.pl?gene=CYTL1</a>       |
| ACKR2    | Atypical Chemokine Receptor 2                                                      | Protein coding | 38 | GC03P042804 | 0.391286701 | <a href="https://www.genecards.org/cgi-bin/carddisp.pl?gene=ACKR2">https://www.genecards.org/cgi-bin/carddisp.pl?gene=ACKR2</a>       |
| MIR1-1   | MicroRNA 1-1                                                                       | RNA gene       | 20 | GC20P063033 | 0.386821538 | <a href="https://www.genecards.org/cgi-bin/carddisp.pl?gene=MIR1-1">https://www.genecards.org/cgi-bin/carddisp.pl?gene=MIR1-1</a>     |
| GPI      | Glucose-6-Phosphate Isomerase                                                      | Protein coding | 46 | GC19P034359 | 0.380469501 | <a href="https://www.genecards.org/cgi-bin/carddisp.pl?gene=GPI">https://www.genecards.org/cgi-bin/carddisp.pl?gene=GPI</a>           |
| MAP3K14  | Mitogen-Activated Protein Kinase Kinase Kinase 14                                  | Protein coding | 44 | GC17M045263 | 0.380469501 | <a href="https://www.genecards.org/cgi-bin/carddisp.pl?gene=MAP3K14">https://www.genecards.org/cgi-bin/carddisp.pl?gene=MAP3K14</a>   |
| GLRX     | Glutaredoxin                                                                       | Protein coding | 44 | GC05M095752 | 0.380384743 | <a href="https://www.genecards.org/cgi-bin/carddisp.pl?gene=GLRX">https://www.genecards.org/cgi-bin/carddisp.pl?gene=GLRX</a>         |
| PTGIR    | Prostaglandin I2 Receptor                                                          | Protein coding | 47 | GC19M048824 | 0.377278388 | <a href="https://www.genecards.org/cgi-bin/carddisp.pl?gene=PTGIR">https://www.genecards.org/cgi-bin/carddisp.pl?gene=PTGIR</a>       |
| FRMD4B   | FERM Domain Containing 4B                                                          | Protein coding | 32 | GC03M069168 | 0.374838114 | <a href="https://www.genecards.org/cgi-bin/carddisp.pl?gene=FRMD4B">https://www.genecards.org/cgi-bin/carddisp.pl?gene=FRMD4B</a>     |
| GATD3    | Glutamine Amidotransferase Class 1 Domain Containing 3                             | Protein coding | 28 | GC21P044135 | 0.373458833 | <a href="https://www.genecards.org/cgi-bin/carddisp.pl?gene=GATD3">https://www.genecards.org/cgi-bin/carddisp.pl?gene=GATD3</a>       |
| SUCNR1   | Succinate Receptor 1                                                               | Protein coding | 40 | GC03P151873 | 0.366880655 | <a href="https://www.genecards.org/cgi-bin/carddisp.pl?gene=SUCNR1">https://www.genecards.org/cgi-bin/carddisp.pl?gene=SUCNR1</a>     |
| F11R     | F11 Receptor                                                                       | Protein coding | 43 | GC01M160995 | 0.365581572 | <a href="https://www.genecards.org/cgi-bin/carddisp.pl?gene=F11R">https://www.genecards.org/cgi-bin/carddisp.pl?gene=F11R</a>         |
| ITGA6    | Integrin Subunit $\alpha$ 6                                                        | Protein coding | 49 | GC02P172427 | 0.363745809 | <a href="https://www.genecards.org/cgi-bin/carddisp.pl?gene=ITGA6">https://www.genecards.org/cgi-bin/carddisp.pl?gene=ITGA6</a>       |
| EPHB2    | EPH Receptor B2                                                                    | Protein coding | 51 | GC01P022710 | 0.363508761 | <a href="https://www.genecards.org/cgi-bin/carddisp.pl?gene=EPHB2">https://www.genecards.org/cgi-bin/carddisp.pl?gene=EPHB2</a>       |
| CASP6    | Caspase 6                                                                          | Protein coding | 48 | GC04M109688 | 0.363508761 | <a href="https://www.genecards.org/cgi-bin/carddisp.pl?gene=CASP6">https://www.genecards.org/cgi-bin/carddisp.pl?gene=CASP6</a>       |
| MYLK2    | Myosin Light Chain Kinase 2                                                        | Protein coding | 48 | GC20P031819 | 0.363508761 | <a href="https://www.genecards.org/cgi-bin/carddisp.pl?gene=MYLK2">https://www.genecards.org/cgi-bin/carddisp.pl?gene=MYLK2</a>       |
| PLD1     | Phospholipase D1                                                                   | Protein coding | 48 | GC03M171600 | 0.363508761 | <a href="https://www.genecards.org/cgi-bin/carddisp.pl?gene=PLD1">https://www.genecards.org/cgi-bin/carddisp.pl?gene=PLD1</a>         |
| DUSP1    | Dual Specificity Phosphatase 1                                                     | Protein coding | 47 | GC05M172768 | 0.363508761 | <a href="https://www.genecards.org/cgi-bin/carddisp.pl?gene=DUSP1">https://www.genecards.org/cgi-bin/carddisp.pl?gene=DUSP1</a>       |
| GJB2     | Gap Junction Protein $\beta$ 2                                                     | Protein coding | 47 | GC13M020187 | 0.363508761 | <a href="https://www.genecards.org/cgi-bin/carddisp.pl?gene=GJB2">https://www.genecards.org/cgi-bin/carddisp.pl?gene=GJB2</a>         |
| MMP19    | Matrix Metallopeptidase 19                                                         | Protein coding | 47 | GC12M055835 | 0.363508761 | <a href="https://www.genecards.org/cgi-bin/carddisp.pl?gene=MMP19">https://www.genecards.org/cgi-bin/carddisp.pl?gene=MMP19</a>       |
| HCN2     | Hyperpolarization Activated Cyclic Nucleotide Gated Potassium And Sodium Channel 2 | Protein coding | 46 | GC19P000589 | 0.363508761 | <a href="https://www.genecards.org/cgi-bin/carddisp.pl?gene=HCN2">https://www.genecards.org/cgi-bin/carddisp.pl?gene=HCN2</a>         |
| CHRM1    | Cholinergic Receptor Muscarinic 1                                                  | Protein coding | 46 | GC11M071549 | 0.363508761 | <a href="https://www.genecards.org/cgi-bin/carddisp.pl?gene=CHRM1">https://www.genecards.org/cgi-bin/carddisp.pl?gene=CHRM1</a>       |
| RORC     | RAR Related Orphan Receptor C                                                      | Protein coding | 45 | GC01M151806 | 0.363508761 | <a href="https://www.genecards.org/cgi-bin/carddisp.pl?gene=RORC">https://www.genecards.org/cgi-bin/carddisp.pl?gene=RORC</a>         |
| AOX1     | Aldehyde Oxidase 1                                                                 | Protein coding | 44 | GC02P200585 | 0.363508761 | <a href="https://www.genecards.org/cgi-bin/carddisp.pl?gene=AOX1">https://www.genecards.org/cgi-bin/carddisp.pl?gene=AOX1</a>         |
| COPS5    | COP9 Signalosome Subunit 5                                                         | Protein coding | 43 | GC08M067043 | 0.363508761 | <a href="https://www.genecards.org/cgi-bin/carddisp.pl?gene=COPS5">https://www.genecards.org/cgi-bin/carddisp.pl?gene=COPS5</a>       |

|           |                                                          |                |    |             |             |                                                                                                                                         |
|-----------|----------------------------------------------------------|----------------|----|-------------|-------------|-----------------------------------------------------------------------------------------------------------------------------------------|
| MYL1      | Myosin Light Chain 1                                     | Protein coding | 42 | GC02M210290 | 0.363508761 | <a href="https://www.genecards.org/cgi-bin/carddisp.pl?gene=MYL1">https://www.genecards.org/cgi-bin/carddisp.pl?gene=MYL1</a>           |
| CAMP      | Cathelicidin Antimicrobial Peptide                       | Protein coding | 41 | GC03P048359 | 0.363508761 | <a href="https://www.genecards.org/cgi-bin/carddisp.pl?gene=CAMP">https://www.genecards.org/cgi-bin/carddisp.pl?gene=CAMP</a>           |
| SPRED1    | Sprouty Related EVH1 Domain Containing 1                 | Protein coding | 41 | GC15P038252 | 0.363508761 | <a href="https://www.genecards.org/cgi-bin/carddisp.pl?gene=SPRED1">https://www.genecards.org/cgi-bin/carddisp.pl?gene=SPRED1</a>       |
| MICA      | MHC Class I Polypeptide-Related Sequence A               | Protein coding | 38 | GC06P031399 | 0.363508761 | <a href="https://www.genecards.org/cgi-bin/carddisp.pl?gene=MICA">https://www.genecards.org/cgi-bin/carddisp.pl?gene=MICA</a>           |
| MIP       | Major Intrinsic Protein Of Lens Fiber                    | Protein coding | 41 | GC12M056449 | 0.351861745 | <a href="https://www.genecards.org/cgi-bin/carddisp.pl?gene=MIP">https://www.genecards.org/cgi-bin/carddisp.pl?gene=MIP</a>             |
| ITPKB     | Inositol-Trisphosphate 3-Kinase B                        | Protein coding | 44 | GC01M226631 | 0.34451431  | <a href="https://www.genecards.org/cgi-bin/carddisp.pl?gene=ITPKB">https://www.genecards.org/cgi-bin/carddisp.pl?gene=ITPKB</a>         |
| PROK2     | Prokineticin 2                                           | Protein coding | 44 | GC03M071771 | 0.33793062  | <a href="https://www.genecards.org/cgi-bin/carddisp.pl?gene=PROK2">https://www.genecards.org/cgi-bin/carddisp.pl?gene=PROK2</a>         |
| TNFRSF10B | TNF Receptor Superfamily Member 10b                      | Protein coding | 50 | GC08M023020 | 0.332517266 | <a href="https://www.genecards.org/cgi-bin/carddisp.pl?gene=TNFRSF10B">https://www.genecards.org/cgi-bin/carddisp.pl?gene=TNFRSF10B</a> |
| ITGB4     | Integrin Subunit $\beta$ 4                               | Protein coding | 48 | GC17P075721 | 0.332517266 | <a href="https://www.genecards.org/cgi-bin/carddisp.pl?gene=ITGB4">https://www.genecards.org/cgi-bin/carddisp.pl?gene=ITGB4</a>         |
| MIR217    | MicroRNA 217                                             | RNA gene       | 19 | GC02M055982 | 0.332517266 | <a href="https://www.genecards.org/cgi-bin/carddisp.pl?gene=MIR217">https://www.genecards.org/cgi-bin/carddisp.pl?gene=MIR217</a>       |
| MIR665    | MicroRNA 665                                             | RNA gene       | 13 | GC14P106835 | 0.331370205 | <a href="https://www.genecards.org/cgi-bin/carddisp.pl?gene=MIR665">https://www.genecards.org/cgi-bin/carddisp.pl?gene=MIR665</a>       |
| SLC8A2    | Solute Carrier Family 8 Member A2                        | Protein coding | 41 | GC19M047428 | 0.327790588 | <a href="https://www.genecards.org/cgi-bin/carddisp.pl?gene=SLC8A2">https://www.genecards.org/cgi-bin/carddisp.pl?gene=SLC8A2</a>       |
| PEBP1     | Phosphatidylethanolamine Binding Protein 1               | Protein coding | 44 | GC12P118135 | 0.326429993 | <a href="https://www.genecards.org/cgi-bin/carddisp.pl?gene=PEBP1">https://www.genecards.org/cgi-bin/carddisp.pl?gene=PEBP1</a>         |
| ACVR2B    | Activin A Receptor Type 2B                               | Protein coding | 50 | GC03P038453 | 0.325780332 | <a href="https://www.genecards.org/cgi-bin/carddisp.pl?gene=ACVR2B">https://www.genecards.org/cgi-bin/carddisp.pl?gene=ACVR2B</a>       |
| ANPEP     | Alanyl Aminopeptidase, Membrane                          | Protein coding | 50 | GC15M089784 | 0.325780332 | <a href="https://www.genecards.org/cgi-bin/carddisp.pl?gene=ANPEP">https://www.genecards.org/cgi-bin/carddisp.pl?gene=ANPEP</a>         |
| STAT6     | Signal Transducer And Activator Of Transcription 6       | Protein coding | 50 | GC12M057095 | 0.325780332 | <a href="https://www.genecards.org/cgi-bin/carddisp.pl?gene=STAT6">https://www.genecards.org/cgi-bin/carddisp.pl?gene=STAT6</a>         |
| RPA1      | Replication Protein A1                                   | Protein coding | 46 | GC17P001829 | 0.325780332 | <a href="https://www.genecards.org/cgi-bin/carddisp.pl?gene=RPA1">https://www.genecards.org/cgi-bin/carddisp.pl?gene=RPA1</a>           |
| ALPP      | Alkaline Phosphatase, Placental                          | Protein coding | 45 | GC02P232378 | 0.325780332 | <a href="https://www.genecards.org/cgi-bin/carddisp.pl?gene=ALPP">https://www.genecards.org/cgi-bin/carddisp.pl?gene=ALPP</a>           |
| GPR37     | G Protein-Coupled Receptor 37                            | Protein coding | 45 | GC07M124745 | 0.325780332 | <a href="https://www.genecards.org/cgi-bin/carddisp.pl?gene=GPR37">https://www.genecards.org/cgi-bin/carddisp.pl?gene=GPR37</a>         |
| CYC1      | Cytochrome C1                                            | Protein coding | 45 | GC08P144095 | 0.325780332 | <a href="https://www.genecards.org/cgi-bin/carddisp.pl?gene=CYC1">https://www.genecards.org/cgi-bin/carddisp.pl?gene=CYC1</a>           |
| LAMB2     | Laminin Subunit $\beta$ 2                                | Protein coding | 45 | GC03M049121 | 0.325780332 | <a href="https://www.genecards.org/cgi-bin/carddisp.pl?gene=LAMB2">https://www.genecards.org/cgi-bin/carddisp.pl?gene=LAMB2</a>         |
| FEN1      | Flap Structure-Specific Endonuclease 1                   | Protein coding | 45 | GC11P061793 | 0.325780332 | <a href="https://www.genecards.org/cgi-bin/carddisp.pl?gene=FEN1">https://www.genecards.org/cgi-bin/carddisp.pl?gene=FEN1</a>           |
| MDH1      | Malate Dehydrogenase 1                                   | Protein coding | 45 | GC02P063557 | 0.325780332 | <a href="https://www.genecards.org/cgi-bin/carddisp.pl?gene=MDH1">https://www.genecards.org/cgi-bin/carddisp.pl?gene=MDH1</a>           |
| PDIA3     | Protein Disulfide Isomerase Family A Member 3            | Protein coding | 45 | GC15P043746 | 0.325780332 | <a href="https://www.genecards.org/cgi-bin/carddisp.pl?gene=PDIA3">https://www.genecards.org/cgi-bin/carddisp.pl?gene=PDIA3</a>         |
| ACAA2     | Acetyl-CoA Acyltransferase 2                             | Protein coding | 44 | GC18M049782 | 0.325780332 | <a href="https://www.genecards.org/cgi-bin/carddisp.pl?gene=ACAA2">https://www.genecards.org/cgi-bin/carddisp.pl?gene=ACAA2</a>         |
| COL6A2    | Collagen Type VI $\alpha$ 2 Chain                        | Protein coding | 44 | GC21P046098 | 0.325780332 | <a href="https://www.genecards.org/cgi-bin/carddisp.pl?gene=COL6A2">https://www.genecards.org/cgi-bin/carddisp.pl?gene=COL6A2</a>       |
| XRCC4     | X-Ray Repair Cross Complementing 4                       | Protein coding | 44 | GC05P083077 | 0.325780332 | <a href="https://www.genecards.org/cgi-bin/carddisp.pl?gene=XRCC4">https://www.genecards.org/cgi-bin/carddisp.pl?gene=XRCC4</a>         |
| COL6A1    | Collagen Type VI $\alpha$ 1 Chain                        | Protein coding | 43 | GC21P045981 | 0.325780332 | <a href="https://www.genecards.org/cgi-bin/carddisp.pl?gene=COL6A1">https://www.genecards.org/cgi-bin/carddisp.pl?gene=COL6A1</a>       |
| CD82      | CD82 Molecule                                            | Protein coding | 43 | GC11P044586 | 0.325780332 | <a href="https://www.genecards.org/cgi-bin/carddisp.pl?gene=CD82">https://www.genecards.org/cgi-bin/carddisp.pl?gene=CD82</a>           |
| TPP1      | Tripeptidyl Peptidase 1                                  | Protein coding | 43 | GC11M006620 | 0.325780332 | <a href="https://www.genecards.org/cgi-bin/carddisp.pl?gene=TPP1">https://www.genecards.org/cgi-bin/carddisp.pl?gene=TPP1</a>           |
| SLC22A8   | Solute Carrier Family 22 Member 8                        | Protein coding | 42 | GC11M071551 | 0.325780332 | <a href="https://www.genecards.org/cgi-bin/carddisp.pl?gene=SLC22A8">https://www.genecards.org/cgi-bin/carddisp.pl?gene=SLC22A8</a>     |
| BPI       | Bactericidal Permeability Increasing Protein             | Protein coding | 41 | GC20P038304 | 0.325780332 | <a href="https://www.genecards.org/cgi-bin/carddisp.pl?gene=BPI">https://www.genecards.org/cgi-bin/carddisp.pl?gene=BPI</a>             |
| ABCB10    | ATP Binding Cassette Subfamily B Member 10               | Protein coding | 41 | GC01M229516 | 0.325780332 | <a href="https://www.genecards.org/cgi-bin/carddisp.pl?gene=ABCB10">https://www.genecards.org/cgi-bin/carddisp.pl?gene=ABCB10</a>       |
| BCAP31    | B Cell Receptor Associated Protein 31                    | Protein coding | 41 | GC0XM153701 | 0.325780332 | <a href="https://www.genecards.org/cgi-bin/carddisp.pl?gene=BCAP31">https://www.genecards.org/cgi-bin/carddisp.pl?gene=BCAP31</a>       |
| ELAVL2    | ELAV Like RNA Binding Protein 2                          | Protein coding | 41 | GC09M023690 | 0.325780332 | <a href="https://www.genecards.org/cgi-bin/carddisp.pl?gene=ELAVL2">https://www.genecards.org/cgi-bin/carddisp.pl?gene=ELAVL2</a>       |
| CHM       | CHM Rab Escort Protein                                   | Protein coding | 41 | GC0XM085861 | 0.325780332 | <a href="https://www.genecards.org/cgi-bin/carddisp.pl?gene=CHM">https://www.genecards.org/cgi-bin/carddisp.pl?gene=CHM</a>             |
| IL17B     | Interleukin 17B                                          | Protein coding | 41 | GC05M149371 | 0.325780332 | <a href="https://www.genecards.org/cgi-bin/carddisp.pl?gene=IL17B">https://www.genecards.org/cgi-bin/carddisp.pl?gene=IL17B</a>         |
| THBS3     | Thrombospondin 3                                         | Protein coding | 41 | GC01M155195 | 0.325780332 | <a href="https://www.genecards.org/cgi-bin/carddisp.pl?gene=THBS3">https://www.genecards.org/cgi-bin/carddisp.pl?gene=THBS3</a>         |
| RBP3      | Retinol Binding Protein 3                                | Protein coding | 41 | GC10P047348 | 0.325780332 | <a href="https://www.genecards.org/cgi-bin/carddisp.pl?gene=RBP3">https://www.genecards.org/cgi-bin/carddisp.pl?gene=RBP3</a>           |
| ZMIZ1     | Zinc Finger MIZ-Type Containing 1                        | Protein coding | 40 | GC10P079068 | 0.325780332 | <a href="https://www.genecards.org/cgi-bin/carddisp.pl?gene=ZMIZ1">https://www.genecards.org/cgi-bin/carddisp.pl?gene=ZMIZ1</a>         |
| MKKS      | MKKS Centrosomal Shuttling Protein                       | Protein coding | 39 | GC20M010424 | 0.325780332 | <a href="https://www.genecards.org/cgi-bin/carddisp.pl?gene=MKKS">https://www.genecards.org/cgi-bin/carddisp.pl?gene=MKKS</a>           |
| PEG3      | Paternally Expressed 3                                   | Protein coding | 38 | GC19M056810 | 0.325780332 | <a href="https://www.genecards.org/cgi-bin/carddisp.pl?gene=PEG3">https://www.genecards.org/cgi-bin/carddisp.pl?gene=PEG3</a>           |
| ADAMTS9   | ADAM Metallopeptidase With Thrombospondin Type 1 Motif 9 | Protein coding | 37 | GC03M064501 | 0.325780332 | <a href="https://www.genecards.org/cgi-bin/carddisp.pl?gene=ADAMTS9">https://www.genecards.org/cgi-bin/carddisp.pl?gene=ADAMTS9</a>     |
| ATG14     | Autophagy Related 14                                     | Protein coding | 36 | GC14M055366 | 0.325780332 | <a href="https://www.genecards.org/cgi-bin/carddisp.pl?gene=ATG14">https://www.genecards.org/cgi-bin/carddisp.pl?gene=ATG14</a>         |
| ADPRH     | ADP-Ribosylarginine Hydrolase                            | Protein coding | 36 | GC03P119579 | 0.325780332 | <a href="https://www.genecards.org/cgi-bin/carddisp.pl?gene=ADPRH">https://www.genecards.org/cgi-bin/carddisp.pl?gene=ADPRH</a>         |
| RNF126    | Ring Finger Protein 126                                  | Protein coding | 36 | GC19M000647 | 0.325780332 | <a href="https://www.genecards.org/cgi-bin/carddisp.pl?gene=RNF126">https://www.genecards.org/cgi-bin/carddisp.pl?gene=RNF126</a>       |
| NARS1     | Asparaginy1-TRNA Synthetase 1                            | Protein coding | 35 | GC18M057601 | 0.325780332 | <a href="https://www.genecards.org/cgi-bin/carddisp.pl?gene=NARS1">https://www.genecards.org/cgi-bin/carddisp.pl?gene=NARS1</a>         |
| MIR26A2   | MicroRNA 26a-2                                           | RNA gene       | 20 | GC12M057824 | 0.325780332 | <a href="https://www.genecards.org/cgi-bin/carddisp.pl?gene=MIR26A2">https://www.genecards.org/cgi-bin/carddisp.pl?gene=MIR26A2</a>     |
| HSPA12B   | Heat Shock Protein Family A (Hsp70) Member 12B           | Protein coding | 36 | GC20P003708 | 0.32291168  | <a href="https://www.genecards.org/cgi-bin/carddisp.pl?gene=HSPA12B">https://www.genecards.org/cgi-bin/carddisp.pl?gene=HSPA12B</a>     |
| MCAM      | Melanoma Cell Adhesion Molecule                          | Protein coding | 40 | GC11M119308 | 0.309914172 | <a href="https://www.genecards.org/cgi-bin/carddisp.pl?gene=MCAM">https://www.genecards.org/cgi-bin/carddisp.pl?gene=MCAM</a>           |
| MIR194-1  | MicroRNA 194-1                                           | RNA gene       | 16 | GC01M220118 | 0.309914172 | <a href="https://www.genecards.org/cgi-bin/carddisp.pl?gene=MIR194-1">https://www.genecards.org/cgi-bin/carddisp.pl?gene=MIR194-1</a>   |
| GRK5      | G Protein-Coupled Receptor Kinase 5                      | Protein coding | 43 | GC10P119207 | 0.30811125  | <a href="https://www.genecards.org/cgi-bin/carddisp.pl?gene=GRK5">https://www.genecards.org/cgi-bin/carddisp.pl?gene=GRK5</a>           |
| MDF1      | MyoD Family Inhibitor                                    | Protein coding | 36 | GC06P058497 | 0.30811125  | <a href="https://www.genecards.org/cgi-bin/carddisp.pl?gene=MDF1">https://www.genecards.org/cgi-bin/carddisp.pl?gene=MDF1</a>           |
| SAA2      | Serum Amyloid A2                                         | Protein coding | 36 | GC11M018238 | 0.30811125  | <a href="https://www.genecards.org/cgi-bin/carddisp.pl?gene=SAA2">https://www.genecards.org/cgi-bin/carddisp.pl?gene=SAA2</a>           |
| PLPP1     | Phospholipid Phosphatase 1                               | Protein coding | 34 | GC05M055425 | 0.30811125  | <a href="https://www.genecards.org/cgi-bin/carddisp.pl?gene=PLPP1">https://www.genecards.org/cgi-bin/carddisp.pl?gene=PLPP1</a>         |
| FLJ16779  | Uncharacterized LOC100192386                             | RNA gene       | 12 | GC20P063253 | 0.30811125  | <a href="https://www.genecards.org/cgi-bin/carddisp.pl?gene=FLJ16779">https://www.genecards.org/cgi-bin/carddisp.pl?gene=FLJ16779</a>   |
| SLC16A1   | Solute Carrier Family 16 Member 1                        | Protein coding | 48 | GC01M112932 | 0.304927856 | <a href="https://www.genecards.org/cgi-bin/carddisp.pl?gene=SLC16A1">https://www.genecards.org/cgi-bin/carddisp.pl?gene=SLC16A1</a>     |
| ITGB5     | Integrin Subunit $\beta$ 5                               | Protein coding | 46 | GC03M124761 | 0.304927856 | <a href="https://www.genecards.org/cgi-bin/carddisp.pl?gene=ITGB5">https://www.genecards.org/cgi-bin/carddisp.pl?gene=ITGB5</a>         |
| PPM1A     | Protein Phosphatase, Mg2+/Mn2+ Dependent 1A              | Protein coding | 44 | GC14P060245 | 0.302420139 | <a href="https://www.genecards.org/cgi-bin/carddisp.pl?gene=PPM1A">https://www.genecards.org/cgi-bin/carddisp.pl?gene=PPM1A</a>         |
| MT2A      | Metallothionein 2A                                       | Protein coding | 43 | GC16P056786 | 0.302420139 | <a href="https://www.genecards.org/cgi-bin/carddisp.pl?gene=MT2A">https://www.genecards.org/cgi-bin/carddisp.pl?gene=MT2A</a>           |
| TRIM65    | Tripartite Motif Containing 65                           | Protein coding | 34 | GC17M075880 | 0.302420139 | <a href="https://www.genecards.org/cgi-bin/carddisp.pl?gene=TRIM65">https://www.genecards.org/cgi-bin/carddisp.pl?gene=TRIM65</a>       |
| TRIM47    | Tripartite Motif Containing 47                           | Protein coding | 34 | GC17M075874 | 0.302420139 | <a href="https://www.genecards.org/cgi-bin/carddisp.pl?gene=TRIM47">https://www.genecards.org/cgi-bin/carddisp.pl?gene=TRIM47</a>       |
| SNORD118  | Small Nucleolar RNA, C/D Box 118                         | RNA gene       | 18 | GC17M009343 | 0.302420139 | <a href="https://www.genecards.org/cgi-bin/carddisp.pl?gene=SNORD118">https://www.genecards.org/cgi-bin/carddisp.pl?gene=SNORD118</a>   |
| ANXA6     | Annexin A6                                               | Protein coding | 42 | GC05M151100 | 0.300202191 | <a href="https://www.genecards.org/cgi-bin/carddisp.pl?gene=ANXA6">https://www.genecards.org/cgi-bin/carddisp.pl?gene=ANXA6</a>         |
| MIR101-1  | MicroRNA 101-1                                           | RNA gene       | 19 | GC01M065058 | 0.300202191 | <a href="https://www.genecards.org/cgi-bin/carddisp.pl?gene=MIR101-1">https://www.genecards.org/cgi-bin/carddisp.pl?gene=MIR101-1</a>   |
| GPR17     | G Protein-Coupled Receptor 17                            | Protein coding | 40 | GC02P127645 | 0.290474772 | <a href="https://www.genecards.org/cgi-bin/carddisp.pl?gene=GPR17">https://www.genecards.org/cgi-bin/carddisp.pl?gene=GPR17</a>         |
| HMCN1     | Hemicentin 1                                             | Protein coding | 37 | GC01P185734 | 0.285183251 | <a href="https://www.genecards.org/cgi-bin/carddisp.pl?gene=HMCN1">https://www.genecards.org/cgi-bin/carddisp.pl?gene=HMCN1</a>         |
| ITGB7     | Integrin Subunit $\beta$ 7                               | Protein coding | 44 | GC12M053191 | 0.28052181  | <a href="https://www.genecards.org/cgi-bin/carddisp.pl?gene=ITGB7">https://www.genecards.org/cgi-bin/carddisp.pl?gene=ITGB7</a>         |
| ITGA8     | Integrin Subunit $\alpha$ 8                              | Protein coding | 43 | GC10M015513 | 0.28052181  | <a href="https://www.genecards.org/cgi-bin/carddisp.pl?gene=ITGA8">https://www.genecards.org/cgi-bin/carddisp.pl?gene=ITGA8</a>         |
| ITGA9     | Integrin Subunit $\alpha$ 9                              | Protein coding | 43 | GC03P037468 | 0.28052181  | <a href="https://www.genecards.org/cgi-bin/carddisp.pl?gene=ITGA9">https://www.genecards.org/cgi-bin/carddisp.pl?gene=ITGA9</a>         |
| ITGA11    | Integrin Subunit $\alpha$ 11                             | Protein coding | 42 | GC15M068296 | 0.28052181  | <a href="https://www.genecards.org/cgi-bin/carddisp.pl?gene=ITGA11">https://www.genecards.org/cgi-bin/carddisp.pl?gene=ITGA11</a>       |
| ITGA10    | Integrin Subunit $\alpha$ 10                             | Protein coding | 38 | GC01M145891 | 0.28052181  | <a href="https://www.genecards.org/cgi-bin/carddisp.pl?gene=ITGA10">https://www.genecards.org/cgi-bin/carddisp.pl?gene=ITGA10</a>       |
| ITGAD     | Integrin Subunit $\alpha$ D                              | Protein coding | 36 | GC16P033544 | 0.28052181  | <a href="https://www.genecards.org/cgi-bin/carddisp.pl?gene=ITGAD">https://www.genecards.org/cgi-bin/carddisp.pl?gene=ITGAD</a>         |
| PPP2CB    | Protein Phosphatase 2 Catalytic Subunit $\beta$          | Protein coding | 45 | GC08M030762 | 0.279161215 | <a href="https://www.genecards.org/cgi-bin/carddisp.pl?gene=PPP2CB">https://www.genecards.org/cgi-bin/carddisp.pl?gene=PPP2CB</a>       |
| ADAMTS4   | ADAM Metallopeptidase With Thrombospondin Type 1 Motif 4 | Protein coding | 43 | GC01M161184 | 0.279161215 | <a href="https://www.genecards.org/cgi-bin/carddisp.pl?gene=ADAMTS4">https://www.genecards.org/cgi-bin/carddisp.pl?gene=ADAMTS4</a>     |
| STC2      | Stanniocalcin 2                                          | Protein coding | 40 | GC05M173314 | 0.279161215 | <a href="https://www.genecards.org/cgi-bin/carddisp.pl?gene=STC2">https://www.genecards.org/cgi-bin/carddisp.pl?gene=STC2</a>           |

|              |                                                            |                   |    |             |             |                                                                                                                                               |
|--------------|------------------------------------------------------------|-------------------|----|-------------|-------------|-----------------------------------------------------------------------------------------------------------------------------------------------|
| GATA2        | GATA Binding Protein 2                                     | Protein coding    | 48 | GC03M128479 | 0.268972635 | <a href="https://www.genecards.org/cgi-bin/carddisp.pl?gene=GATA2">https://www.genecards.org/cgi-bin/carddisp.pl?gene=GATA2</a>               |
| SUMO2        | Small Ubiquitin Like Modifier 2                            | Protein coding    | 39 | GC17M075165 | 0.268972635 | <a href="https://www.genecards.org/cgi-bin/carddisp.pl?gene=SUMO2">https://www.genecards.org/cgi-bin/carddisp.pl?gene=SUMO2</a>               |
| ANKRD2       | Ankyrin Repeat Domain 2                                    | Protein coding    | 36 | GC10P097572 | 0.26469171  | <a href="https://www.genecards.org/cgi-bin/carddisp.pl?gene=ANKRD2">https://www.genecards.org/cgi-bin/carddisp.pl?gene=ANKRD2</a>             |
| SP8          | Sp8 Transcription Factor                                   | Protein coding    | 36 | GC07M020788 | 0.26469171  | <a href="https://www.genecards.org/cgi-bin/carddisp.pl?gene=SP8">https://www.genecards.org/cgi-bin/carddisp.pl?gene=SP8</a>                   |
| NR1I2        | Nuclear Receptor Subfamily 1 Group 1 Member 2              | Protein coding    | 46 | GC03P119780 | 0.251571774 | <a href="https://www.genecards.org/cgi-bin/carddisp.pl?gene=NR1I2">https://www.genecards.org/cgi-bin/carddisp.pl?gene=NR1I2</a>               |
| GPC3         | Glypican 3                                                 | Protein coding    | 45 | GC0XM133535 | 0.251571774 | <a href="https://www.genecards.org/cgi-bin/carddisp.pl?gene=GPC3">https://www.genecards.org/cgi-bin/carddisp.pl?gene=GPC3</a>                 |
| LONP1        | Lon Peptidase 1, Mitochondrial                             | Protein coding    | 44 | GC19M005691 | 0.251571774 | <a href="https://www.genecards.org/cgi-bin/carddisp.pl?gene=LONP1">https://www.genecards.org/cgi-bin/carddisp.pl?gene=LONP1</a>               |
| SLC1A5       | Solute Carrier Family 1 Member 5                           | Protein coding    | 44 | GC19M048846 | 0.251571774 | <a href="https://www.genecards.org/cgi-bin/carddisp.pl?gene=SLC1A5">https://www.genecards.org/cgi-bin/carddisp.pl?gene=SLC1A5</a>             |
| VAV2         | Vav Guanine Nucleotide Exchange Factor 2                   | Protein coding    | 44 | GC09M133761 | 0.251571774 | <a href="https://www.genecards.org/cgi-bin/carddisp.pl?gene=VAV2">https://www.genecards.org/cgi-bin/carddisp.pl?gene=VAV2</a>                 |
| DHX9         | DExH-Box Helicase 9                                        | Protein coding    | 40 | GC01P182839 | 0.251571774 | <a href="https://www.genecards.org/cgi-bin/carddisp.pl?gene=DHX9">https://www.genecards.org/cgi-bin/carddisp.pl?gene=DHX9</a>                 |
| DAB2IP       | DAB2 Interacting Protein                                   | Protein coding    | 40 | GC09P121566 | 0.251571774 | <a href="https://www.genecards.org/cgi-bin/carddisp.pl?gene=DAB2IP">https://www.genecards.org/cgi-bin/carddisp.pl?gene=DAB2IP</a>             |
| CLEC4A       | C-Type Lectin Domain Family 4 Member A                     | Protein coding    | 37 | GC12P013229 | 0.251571774 | <a href="https://www.genecards.org/cgi-bin/carddisp.pl?gene=CLEC4A">https://www.genecards.org/cgi-bin/carddisp.pl?gene=CLEC4A</a>             |
| LOC111365141 | NOS2 5' Regulatory Region                                  | Biological region | 2  | GC17P027800 | 0.251571774 | <a href="https://www.genecards.org/cgi-bin/carddisp.pl?gene=LOC111365141">https://www.genecards.org/cgi-bin/carddisp.pl?gene=LOC111365141</a> |
| MAP3K1       | Mitogen-Activated Protein Kinase Kinase Kinase 1           | Protein coding    | 50 | GC05P056815 | 0.244566604 | <a href="https://www.genecards.org/cgi-bin/carddisp.pl?gene=MAP3K1">https://www.genecards.org/cgi-bin/carddisp.pl?gene=MAP3K1</a>             |
| MAP2K7       | Mitogen-Activated Protein Kinase Kinase 7                  | Protein coding    | 46 | GC19P007903 | 0.244566604 | <a href="https://www.genecards.org/cgi-bin/carddisp.pl?gene=MAP2K7">https://www.genecards.org/cgi-bin/carddisp.pl?gene=MAP2K7</a>             |
| HELLS        | Helicase, Lymphoid Specific                                | Protein coding    | 45 | GC10P094501 | 0.244566604 | <a href="https://www.genecards.org/cgi-bin/carddisp.pl?gene=HELLS">https://www.genecards.org/cgi-bin/carddisp.pl?gene=HELLS</a>               |
| S1PR3        | Sphingosine-1-Phosphate Receptor 3                         | Protein coding    | 45 | GC09P088991 | 0.244566604 | <a href="https://www.genecards.org/cgi-bin/carddisp.pl?gene=S1PR3">https://www.genecards.org/cgi-bin/carddisp.pl?gene=S1PR3</a>               |
| FAP          | Fibroblast Activation Protein $\alpha$                     | Protein coding    | 42 | GC02M162170 | 0.244566604 | <a href="https://www.genecards.org/cgi-bin/carddisp.pl?gene=FAP">https://www.genecards.org/cgi-bin/carddisp.pl?gene=FAP</a>                   |
| FRZB         | Frizzled Related Protein                                   | Protein coding    | 41 | GC02M182833 | 0.244566604 | <a href="https://www.genecards.org/cgi-bin/carddisp.pl?gene=FRZB">https://www.genecards.org/cgi-bin/carddisp.pl?gene=FRZB</a>                 |
| CREG1        | Cellular Repressor Of E1A Stimulated Genes 1               | Protein coding    | 37 | GC01M167498 | 0.244566604 | <a href="https://www.genecards.org/cgi-bin/carddisp.pl?gene=CREG1">https://www.genecards.org/cgi-bin/carddisp.pl?gene=CREG1</a>               |
| MEIS1        | Meis Homeobox 1                                            | Protein coding    | 43 | GC02P066433 | 0.241432756 | <a href="https://www.genecards.org/cgi-bin/carddisp.pl?gene=MEIS1">https://www.genecards.org/cgi-bin/carddisp.pl?gene=MEIS1</a>               |
| NDRG2        | NDRG Family Member 2                                       | Protein coding    | 38 | GC14M021016 | 0.241432756 | <a href="https://www.genecards.org/cgi-bin/carddisp.pl?gene=NDRG2">https://www.genecards.org/cgi-bin/carddisp.pl?gene=NDRG2</a>               |
| TMEM196      | Transmembrane Protein 196                                  | Protein coding    | 29 | GC07M019758 | 0.241432756 | <a href="https://www.genecards.org/cgi-bin/carddisp.pl?gene=TMEM196">https://www.genecards.org/cgi-bin/carddisp.pl?gene=TMEM196</a>           |
| MIR3146      | MicroRNA 3146                                              | RNA gene          | 12 | GC07M019744 | 0.241432756 | <a href="https://www.genecards.org/cgi-bin/carddisp.pl?gene=MIR3146">https://www.genecards.org/cgi-bin/carddisp.pl?gene=MIR3146</a>           |
| FCER1G       | Fc Fragment Of IgE Receptor Ig                             | Protein coding    | 43 | GC01P161215 | 0.215616554 | <a href="https://www.genecards.org/cgi-bin/carddisp.pl?gene=FCER1G">https://www.genecards.org/cgi-bin/carddisp.pl?gene=FCER1G</a>             |
| GSTA2        | Glutathione S-Transferase $\alpha$ 2                       | Protein coding    | 42 | GC06M052750 | 0.215616554 | <a href="https://www.genecards.org/cgi-bin/carddisp.pl?gene=GSTA2">https://www.genecards.org/cgi-bin/carddisp.pl?gene=GSTA2</a>               |
| AQP8         | Aquaporin 8                                                | Protein coding    | 37 | GC16P026880 | 0.215616554 | <a href="https://www.genecards.org/cgi-bin/carddisp.pl?gene=AQP8">https://www.genecards.org/cgi-bin/carddisp.pl?gene=AQP8</a>                 |
| SCG5         | Secretogranin V                                            | Protein coding    | 37 | GC15P032641 | 0.215616554 | <a href="https://www.genecards.org/cgi-bin/carddisp.pl?gene=SCG5">https://www.genecards.org/cgi-bin/carddisp.pl?gene=SCG5</a>                 |
| EFS          | Embryonal Fyn-Associated Substrate                         | Protein coding    | 36 | GC14M023356 | 0.215616554 | <a href="https://www.genecards.org/cgi-bin/carddisp.pl?gene=EFS">https://www.genecards.org/cgi-bin/carddisp.pl?gene=EFS</a>                   |
| SIVA1        | SIVA1 Apoptosis Inducing Factor                            | Protein coding    | 36 | GC14P106549 | 0.215616554 | <a href="https://www.genecards.org/cgi-bin/carddisp.pl?gene=SIVA1">https://www.genecards.org/cgi-bin/carddisp.pl?gene=SIVA1</a>               |
| AHR          | Aryl Hydrocarbon Receptor                                  | Protein coding    | 48 | GC07P016916 | 0.213843346 | <a href="https://www.genecards.org/cgi-bin/carddisp.pl?gene=AHR">https://www.genecards.org/cgi-bin/carddisp.pl?gene=AHR</a>                   |
| CCNA2        | Cyclin A2                                                  | Protein coding    | 44 | GC04M121816 | 0.213843346 | <a href="https://www.genecards.org/cgi-bin/carddisp.pl?gene=CCNA2">https://www.genecards.org/cgi-bin/carddisp.pl?gene=CCNA2</a>               |
| DBT          | Dihydrolipoamide Branched Chain Transacylase E2            | Protein coding    | 43 | GC01M100186 | 0.213843346 | <a href="https://www.genecards.org/cgi-bin/carddisp.pl?gene=DBT">https://www.genecards.org/cgi-bin/carddisp.pl?gene=DBT</a>                   |
| PARG         | Poly(ADP-Ribose) Glycohydrolase                            | Protein coding    | 39 | GC10M049818 | 0.213843346 | <a href="https://www.genecards.org/cgi-bin/carddisp.pl?gene=PARG">https://www.genecards.org/cgi-bin/carddisp.pl?gene=PARG</a>                 |
| AZIN2        | Antizyme Inhibitor 2                                       | Protein coding    | 36 | GC01P033081 | 0.213843346 | <a href="https://www.genecards.org/cgi-bin/carddisp.pl?gene=AZIN2">https://www.genecards.org/cgi-bin/carddisp.pl?gene=AZIN2</a>               |
| TMEM107      | Transmembrane Protein 107                                  | Protein coding    | 36 | GC17M009349 | 0.213843346 | <a href="https://www.genecards.org/cgi-bin/carddisp.pl?gene=TMEM107">https://www.genecards.org/cgi-bin/carddisp.pl?gene=TMEM107</a>           |
| H2BC3        | H2B Clustered Histone 3                                    | Protein coding    | 28 | GC06M026044 | 0.213843346 | <a href="https://www.genecards.org/cgi-bin/carddisp.pl?gene=H2BC3">https://www.genecards.org/cgi-bin/carddisp.pl?gene=H2BC3</a>               |
| MIR544A      | MicroRNA 544a                                              | RNA gene          | 15 | GC14P106831 | 0.213843346 | <a href="https://www.genecards.org/cgi-bin/carddisp.pl?gene=MIR544A">https://www.genecards.org/cgi-bin/carddisp.pl?gene=MIR544A</a>           |
| MIR1264      | MicroRNA 1264                                              | RNA gene          | 9  | GC0XP114652 | 0.213843346 | <a href="https://www.genecards.org/cgi-bin/carddisp.pl?gene=MIR1264">https://www.genecards.org/cgi-bin/carddisp.pl?gene=MIR1264</a>           |
| CSF2RB       | Colony Stimulating Factor 2 Receptor Subunit $\beta$       | Protein coding    | 48 | GC22P036913 | 0.177888125 | <a href="https://www.genecards.org/cgi-bin/carddisp.pl?gene=CSF2RB">https://www.genecards.org/cgi-bin/carddisp.pl?gene=CSF2RB</a>             |
| PLCD1        | Phospholipase C $\delta$ 1                                 | Protein coding    | 48 | GC03M038008 | 0.177888125 | <a href="https://www.genecards.org/cgi-bin/carddisp.pl?gene=PLCD1">https://www.genecards.org/cgi-bin/carddisp.pl?gene=PLCD1</a>               |
| PRKCI        | Protein Kinase C $\iota$                                   | Protein coding    | 48 | GC03P170222 | 0.177888125 | <a href="https://www.genecards.org/cgi-bin/carddisp.pl?gene=PRKCI">https://www.genecards.org/cgi-bin/carddisp.pl?gene=PRKCI</a>               |
| PRLR         | Prolactin Receptor                                         | Protein coding    | 47 | GC05M035048 | 0.177888125 | <a href="https://www.genecards.org/cgi-bin/carddisp.pl?gene=PRLR">https://www.genecards.org/cgi-bin/carddisp.pl?gene=PRLR</a>                 |
| SLC27A4      | Solute Carrier Family 27 Member 4                          | Protein coding    | 46 | GC09P128340 | 0.177888125 | <a href="https://www.genecards.org/cgi-bin/carddisp.pl?gene=SLC27A4">https://www.genecards.org/cgi-bin/carddisp.pl?gene=SLC27A4</a>           |
| HSP90AB1     | Heat Shock Protein 90 $\alpha$ Family Class B Member 1     | Protein coding    | 45 | GC06P044246 | 0.177888125 | <a href="https://www.genecards.org/cgi-bin/carddisp.pl?gene=HSP90AB1">https://www.genecards.org/cgi-bin/carddisp.pl?gene=HSP90AB1</a>         |
| SLC6A6       | Solute Carrier Family 6 Member 6                           | Protein coding    | 45 | GC03P014402 | 0.177888125 | <a href="https://www.genecards.org/cgi-bin/carddisp.pl?gene=SLC6A6">https://www.genecards.org/cgi-bin/carddisp.pl?gene=SLC6A6</a>             |
| AKAP13       | A-Kinase Anchoring Protein 13                              | Protein coding    | 44 | GC15P085558 | 0.177888125 | <a href="https://www.genecards.org/cgi-bin/carddisp.pl?gene=AKAP13">genecards.org/cgi-bin/carddisp.pl?gene=AKAP13</a>                         |
| SLCO2B1      | Solute Carrier Organic Anion Transporter Family Member 2B1 | Protein coding    | 44 | GC11P076426 | 0.177888125 | <a href="https://www.genecards.org/cgi-bin/carddisp.pl?gene=SLCO2B1">https://www.genecards.org/cgi-bin/carddisp.pl?gene=SLCO2B1</a>           |
| FLRT3        | Fibronectin Leucine Rich Transmembrane Protein 3           | Protein coding    | 43 | GC20M014322 | 0.177888125 | <a href="https://www.genecards.org/cgi-bin/carddisp.pl?gene=FLRT3">https://www.genecards.org/cgi-bin/carddisp.pl?gene=FLRT3</a>               |
| ID1          | Inhibitor Of DNA Binding 1, HLH Protein                    | Protein coding    | 43 | GC20P031605 | 0.177888125 | <a href="https://www.genecards.org/cgi-bin/carddisp.pl?gene=ID1">https://www.genecards.org/cgi-bin/carddisp.pl?gene=ID1</a>                   |
| LAMC1        | Laminin Subunit $\gamma$ 1                                 | Protein coding    | 43 | GC01P182992 | 0.177888125 | <a href="https://www.genecards.org/cgi-bin/carddisp.pl?gene=LAMC1">https://www.genecards.org/cgi-bin/carddisp.pl?gene=LAMC1</a>               |
| SLC38A1      | Solute Carrier Family 38 Member 1                          | Protein coding    | 43 | GC12M046183 | 0.177888125 | <a href="https://www.genecards.org/cgi-bin/carddisp.pl?gene=SLC38A1">https://www.genecards.org/cgi-bin/carddisp.pl?gene=SLC38A1</a>           |
| SIRPA        | Signal Regulatory Protein $\alpha$                         | Protein coding    | 43 | GC20P001894 | 0.177888125 | <a href="https://www.genecards.org/cgi-bin/carddisp.pl?gene=SIRPA">https://www.genecards.org/cgi-bin/carddisp.pl?gene=SIRPA</a>               |
| DYNLL1       | Dynein Light Chain LC8-Type 1                              | Protein coding    | 41 | GC12P120469 | 0.177888125 | <a href="https://www.genecards.org/cgi-bin/carddisp.pl?gene=DYNLL1">https://www.genecards.org/cgi-bin/carddisp.pl?gene=DYNLL1</a>             |
| CCT3         | Chaperonin Containing TCP1 Subunit 3                       | Protein coding    | 41 | GC01M156308 | 0.177888125 | <a href="https://www.genecards.org/cgi-bin/carddisp.pl?gene=CCT3">https://www.genecards.org/cgi-bin/carddisp.pl?gene=CCT3</a>                 |
| BBC3         | BCL2 Binding Component 3                                   | Protein coding    | 41 | GC19M047220 | 0.177888125 | <a href="https://www.genecards.org/cgi-bin/carddisp.pl?gene=BBC3">https://www.genecards.org/cgi-bin/carddisp.pl?gene=BBC3</a>                 |
| ESAM         | Endothelial Cell Adhesion Molecule                         | Protein coding    | 41 | GC11M124752 | 0.177888125 | <a href="https://www.genecards.org/cgi-bin/carddisp.pl?gene=ESAM">https://www.genecards.org/cgi-bin/carddisp.pl?gene=ESAM</a>                 |
| PCSK6        | Proprotein Convertase Subtilisin/Kexin Type 6              | Protein coding    | 41 | GC15M108721 | 0.177888125 | <a href="https://www.genecards.org/cgi-bin/carddisp.pl?gene=PCSK6">https://www.genecards.org/cgi-bin/carddisp.pl?gene=PCSK6</a>               |
| RAB1A        | RAB1A, Member RAS Oncogene Family                          | Protein coding    | 41 | GC02M065072 | 0.177888125 | <a href="https://www.genecards.org/cgi-bin/carddisp.pl?gene=RAB1A">https://www.genecards.org/cgi-bin/carddisp.pl?gene=RAB1A</a>               |
| TLN1         | Talin 1                                                    | Protein coding    | 41 | GC09M035696 | 0.177888125 | <a href="https://www.genecards.org/cgi-bin/carddisp.pl?gene=TLN1">https://www.genecards.org/cgi-bin/carddisp.pl?gene=TLN1</a>                 |
| BIK          | BCL2 Interacting Killer                                    | Protein coding    | 40 | GC22P043110 | 0.177888125 | <a href="https://www.genecards.org/cgi-bin/carddisp.pl?gene=BIK">https://www.genecards.org/cgi-bin/carddisp.pl?gene=BIK</a>                   |
| CCT4         | Chaperonin Containing TCP1 Subunit 4                       | Protein coding    | 40 | GC02M061868 | 0.177888125 | <a href="https://www.genecards.org/cgi-bin/carddisp.pl?gene=CCT4">https://www.genecards.org/cgi-bin/carddisp.pl?gene=CCT4</a>                 |
| SLC16A4      | Solute Carrier Family 16 Member 4                          | Protein coding    | 40 | GC01M110362 | 0.177888125 | <a href="https://www.genecards.org/cgi-bin/carddisp.pl?gene=SLC16A4">https://www.genecards.org/cgi-bin/carddisp.pl?gene=SLC16A4</a>           |
| MUC2         | Mucin 2, Oligomeric Mucus/Gel-Forming                      | Protein coding    | 39 | GC11P001074 | 0.177888125 | <a href="https://www.genecards.org/cgi-bin/carddisp.pl?gene=MUC2">https://www.genecards.org/cgi-bin/carddisp.pl?gene=MUC2</a>                 |
| BCL2L14      | BCL2 Like 14                                               | Protein coding    | 38 | GC12P012049 | 0.177888125 | <a href="https://www.genecards.org/cgi-bin/carddisp.pl?gene=BCL2L14">https://www.genecards.org/cgi-bin/carddisp.pl?gene=BCL2L14</a>           |
| FHOD1        | Formin Homology 2 Domain Containing 1                      | Protein coding    | 38 | GC16M067230 | 0.177888125 | <a href="https://www.genecards.org/cgi-bin/carddisp.pl?gene=FHOD1">https://www.genecards.org/cgi-bin/carddisp.pl?gene=FHOD1</a>               |
| HIGD1A       | HIG1 Hypoxia Inducible Domain Family Member 1A             | Protein coding    | 38 | GC03M042782 | 0.177888125 | <a href="https://www.genecards.org/cgi-bin/carddisp.pl?gene=HIGD1A">https://www.genecards.org/cgi-bin/carddisp.pl?gene=HIGD1A</a>             |
| DCTN6        | Dynactin Subunit 6                                         | Protein coding    | 35 | GC08P030133 | 0.177888125 | <a href="https://www.genecards.org/cgi-bin/carddisp.pl?gene=DCTN6">https://www.genecards.org/cgi-bin/carddisp.pl?gene=DCTN6</a>               |
| APOO         | Apolipoprotein O                                           | Protein coding    | 35 | GC0XM023834 | 0.177888125 | <a href="https://www.genecards.org/cgi-bin/carddisp.pl?gene=APOO">https://www.genecards.org/cgi-bin/carddisp.pl?gene=APOO</a>                 |
| CCL23        | C-C Motif Chemokine Ligand 23                              | Protein coding    | 34 | GC17M036013 | 0.177888125 | <a href="https://www.genecards.org/cgi-bin/carddisp.pl?gene=CCL23">https://www.genecards.org/cgi-bin/carddisp.pl?gene=CCL23</a>               |
| LANCL1       | LanC Like 1                                                | Protein coding    | 34 | GC02M210431 | 0.177888125 | <a href="https://www.genecards.org/cgi-bin/carddisp.pl?gene=LANCL1">https://www.genecards.org/cgi-bin/carddisp.pl?gene=LANCL1</a>             |
| NRDC         | Nardilysin Convertase                                      | Protein coding    | 30 | GC01M051790 | 0.177888125 | <a href="https://www.genecards.org/cgi-bin/carddisp.pl?gene=NRDC">https://www.genecards.org/cgi-bin/carddisp.pl?gene=NRDC</a>                 |
| MIR26A1      | MicroRNA 26a-1                                             | RNA gene          | 21 | GC03P037969 | 0.177888125 | <a href="https://www.genecards.org/cgi-bin/carddisp.pl?gene=MIR26A1">https://www.genecards.org/cgi-bin/carddisp.pl?gene=MIR26A1</a>           |
| MIR194-2     | MicroRNA 194-2                                             | RNA gene          | 20 | GC11M071624 | 0.177888125 | <a href="https://www.genecards.org/cgi-bin/carddisp.pl?gene=MIR194-2">https://www.genecards.org/cgi-bin/carddisp.pl?gene=MIR194-2</a>         |
| ZFAS1        | ZNFX1 Antisense RNA 1                                      | RNA gene          | 20 | GC20P049276 | 0.177888125 | <a href="https://www.genecards.org/cgi-bin/carddisp.pl?gene=ZFAS1">https://www.genecards.org/cgi-bin/carddisp.pl?gene=ZFAS1</a>               |
| HOTAIRM1     | HOXA Transcript Antisense RNA, Myeloid-Specific 1          | RNA gene          | 19 | GC07P027095 | 0.177888125 | <a href="https://www.genecards.org/cgi-bin/carddisp.pl?gene=HOTAIRM1">https://www.genecards.org/cgi-bin/carddisp.pl?gene=HOTAIRM1</a>         |

|          |                                      |          |    |             |             |                                                                                                                                       |
|----------|--------------------------------------|----------|----|-------------|-------------|---------------------------------------------------------------------------------------------------------------------------------------|
| HOXA-AS2 | HOXA Cluster Antisense RNA 2         | RNA gene | 18 | GC07P027107 | 0.177888125 | <a href="https://www.genecards.org/cgi-bin/carddisp.pl?gene=HOXA-AS2">https://www.genecards.org/cgi-bin/carddisp.pl?gene=HOXA-AS2</a> |
| MIR216B  | MicroRNA 216b                        | RNA gene | 15 | GC02M056000 | 0.177888125 | <a href="https://www.genecards.org/cgi-bin/carddisp.pl?gene=MIR216B">https://www.genecards.org/cgi-bin/carddisp.pl?gene=MIR216B</a>   |
| MIR496   | MicroRNA 496                         | RNA gene | 15 | GC14P106828 | 0.177888125 | <a href="https://www.genecards.org/cgi-bin/carddisp.pl?gene=MIR496">https://www.genecards.org/cgi-bin/carddisp.pl?gene=MIR496</a>     |
| CCAT2    | Colon Cancer Associated Transcript 2 | RNA gene | 13 | GC08P127400 | 0.177888125 | <a href="https://www.genecards.org/cgi-bin/carddisp.pl?gene=CCAT2">https://www.genecards.org/cgi-bin/carddisp.pl?gene=CCAT2</a>       |
| MIR1202  | MicroRNA 1202                        | RNA gene | 13 | GC06P155946 | 0.177888125 | <a href="https://www.genecards.org/cgi-bin/carddisp.pl?gene=MIR1202">https://www.genecards.org/cgi-bin/carddisp.pl?gene=MIR1202</a>   |
| HOXB-AS2 | HOXB Cluster Antisense RNA 2         | RNA gene | 12 | GC17P048558 | 0.177888125 | <a href="https://www.genecards.org/cgi-bin/carddisp.pl?gene=HOXB-AS2">https://www.genecards.org/cgi-bin/carddisp.pl?gene=HOXB-AS2</a> |
| MIR448   | MicroRNA 448                         | RNA gene | 12 | GC0XP114823 | 0.177888125 | <a href="https://www.genecards.org/cgi-bin/carddisp.pl?gene=MIR448">https://www.genecards.org/cgi-bin/carddisp.pl?gene=MIR448</a>     |

Table SV. IS targets in the DisGeNET.

| Gene       | Gene_id   | UniProt       | Gene_full_name                                                                             | Protein_Class              | N_diseases_g | DSI_g | DPI_g | pLI  | Score_gda | EL_gda  | EI_gda | N_PMI_Ds | N_SNPsgda | First_Ref | Last_Ref |
|------------|-----------|---------------|--------------------------------------------------------------------------------------------|----------------------------|--------------|-------|-------|------|-----------|---------|--------|----------|-----------|-----------|----------|
| GLA        | 2717      | P06280        | Galactosidase $\alpha$                                                                     |                            | 190          | 0.537 | 0.769 | 1.00 | 0.32      | Strong  | 1.00   | 3        | 0         | 2004      | 2014     |
| APP        | 351       | P05067        | Amyloid $\beta$ precursor protein                                                          | Enzyme modulator           | 485          | 0.422 | 0.846 | 0.05 | 0.31      | Strong  | 1.00   | 2        | 0         | 2010      | 2020     |
| COL3A1     | 1281      | P02461        | Collagen type III $\alpha$ 1 chain                                                         |                            | 301          | 0.477 | 0.808 | 1.00 | 0.30      | Strong  | 1.00   | 1        | 0         | 1995      | 1995     |
| ITM2B      | 9445      | Q9Y287        | Integral membrane protein 2B                                                               |                            | 77           | 0.617 | 0.654 | 0.63 | 0.30      | Limited | 1.00   | 1        | 0         | 2000      | 2000     |
| F2         | 2147      | P00734        | Coagulation factor II, thrombin                                                            | Enzyme                     | 490          | 0.415 | 0.885 | 0.00 | 0.20      |         | 0.94   | 32       | 5         | 1998      | 2019     |
| F5         | 2153      | P12259        | Coagulation factor V                                                                       | Enzyme                     | 369          | 0.441 | 0.846 | 0.00 | 0.20      |         | 0.96   | 26       | 2         | 1998      | 2019     |
| NOTCH3     | 4854      | Q9UM47        | Notch receptor 3                                                                           |                            | 418          | 0.435 | 0.808 | 0.41 | 0.20      |         | 1.00   | 14       | 5         | 2004      | 2019     |
| ADAMTS13   | 11093     | Q76LX8        | ADAM metallopeptidase with thrombospondin type 1 motif 13                                  | Enzyme                     | 229          | 0.496 | 0.769 | 0.00 | 0.19      |         | 1.00   | 10       | 1         | 2006      | 2019     |
| HDAC9      | 9734      | Q9UKV0        | Histone deacetylase 9                                                                      | Epigenetic regulator       | 340          | 0.439 | 0.846 | 1.00 | 0.19      |         | 0.90   | 10       | 3         | 2012      | 2019     |
| CDKN2B-AS1 | 100048912 |               | CDKN2B antisense RNA 1                                                                     |                            | 213          | 0.491 | 0.769 |      | 0.18      |         | 0.89   | 9        | 11        | 2012      | 2020     |
| LDLR       | 3949      | P01130        | Low density lipoprotein receptor                                                           |                            | 336          | 0.449 | 0.885 | 0.00 | 0.16      |         | 0.83   | 6        | 41        | 2006      | 2019     |
| ALDH2      | 217       | P05091        | Aldehyde dehydrogenase 2 family member                                                     | Enzyme                     | 337          | 0.457 | 0.885 | 0.00 | 0.15      |         | 1.00   | 6        | 4         | 2016      | 2019     |
| ABO        | 28        | P16442        | ABO, $\alpha$ 1-3-N-acetylgalactosaminyltransferase and $\alpha$ 1-3-galactosyltransferase | Enzyme                     | 443          | 0.427 | 0.885 |      | 0.15      |         | 0.86   | 7        | 3         | 2012      | 2018     |
| ZFXH3      | 463       | Q15911;Q6ZP98 | Zinc finger homeobox 3                                                                     |                            | 85           | 0.621 | 0.654 | 0.45 | 0.13      |         | 0.75   | 4        | 2         | 2009      | 2020     |
| ACTA2      | 59        | P62736        | Actin $\alpha$ 2, smooth muscle                                                            | Cellular structure         | 200          | 0.508 | 0.846 | 0.93 | 0.13      |         | 1.00   | 3        | 0         | 2009      | 2019     |
| PROCR      | 10544     | Q9UNN8        | Protein C receptor                                                                         | Enzyme modulator           | 110          | 0.56  | 0.692 | 0.01 | 0.12      |         | 1.00   | 3        | 2         | 2014      | 2018     |
| PDE3A      | 5139      | Q14432        | Phosphodiesterase 3A                                                                       |                            | 58           | 0.67  | 0.577 | 0.00 | 0.12      |         | 1.00   | 3        | 1         | 2017      | 2019     |
| SLCO1B1    | 10599     | Q9Y6L6        | Solute carrier organic anion transporter family member 1B1                                 | Transporter                | 151          | 0.538 | 0.731 | 0.00 | 0.11      |         | 1.00   | 2        | 1         | 2016      | 2019     |
| COL4A1     | 1282      | P02462        | Collagen type IV $\alpha$ 1 chain                                                          |                            | 277          | 0.484 | 0.731 | 1.00 | 0.11      |         | 1.00   | 1        | 0         | 2010      | 2010     |
| LOX        | 4015      | P28300        | Lysyl oxidase                                                                              |                            | 328          | 0.447 | 0.846 | 0.99 | 0.11      |         | 1.00   | 1        | 1         | 2012      | 2012     |
| SMAD3      | 4088      | P84022        | SMAD family member 3                                                                       | Transcription factor       | 470          | 0.415 | 0.923 | 0.80 | 0.11      |         | 1.00   | 1        | 0         | 2018      | 2018     |
| ABCC1      | 4363      | P33527        | ATP binding cassette subfamily C member 1                                                  | Transporter                | 333          | 0.445 | 0.808 | 0.00 | 0.11      |         | 1.00   | 2        | 1         | 2016      | 2019     |
| PRKG1      | 5592      | Q13976        | Protein kinase cgmpp-dependent 1                                                           | Kinase                     | 114          | 0.603 | 0.769 | 1.00 | 0.11      |         | 1.00   | 1        | 1         | 2019      | 2019     |
| TGFR2      | 7048      | P37173        | Transforming growth factor $\beta$ receptor 2                                              | Kinase                     | 502          | 0.413 | 0.846 | 0.13 | 0.11      |         | 1.00   | 1        | 2         | 2011      | 2011     |
| C20orf181  | 100128998 |               | Chromosome 20 open reading frame 181                                                       |                            | 246          | 0.479 | 0.885 |      | 0.10      |         | 0.98   | 101      | 0         | 2001      | 2020     |
| SH2B3      | 10019     | Q9UQQ2        | SH2B adaptor protein 3                                                                     |                            | 212          | 0.527 | 0.692 | 0.00 | 0.10      |         | 1.00   | 1        | 1         | 2018      | 2018     |
| PMF1-BGLAP | 100527963 | Q6P1K2        | PMF1-BGLAP readthrough                                                                     |                            | 9            | 0.861 | 0.192 | 0.00 | 0.10      |         | 1.00   | 1        | 1         | 2018      | 2018     |
| PATJ       | 10207     | Q8NI35        | PATJ crumbs cell polarity complex component                                                |                            | 33           | 0.751 | 0.538 | 0.00 | 0.10      |         | 1.00   | 1        | 1         | 2019      | 2019     |
| CDK6       | 1021      | Q00534        | Cyclin dependent kinase 6                                                                  | Kinase                     | 266          | 0.471 | 0.731 | 0.98 | 0.10      |         | 1.00   | 1        | 1         | 2018      | 2018     |
| CDKN1A     | 1026      | P38936        | Cyclin dependent kinase inhibitor 1A                                                       |                            | 490          | 0.403 | 0.769 | 0.00 | 0.10      |         | 1.00   | 1        | 1         | 2018      | 2018     |
| CDKN2C     | 1031      | P42773        | Cyclin dependent kinase inhibitor 2C                                                       |                            | 149          | 0.527 | 0.654 | 0.40 | 0.10      |         | 1.00   | 1        | 1         | 2016      | 2016     |
| CERNA3     | 105375847 |               | Competing endogenous lncrna 3 for mir-645                                                  |                            | 140          | 0.531 | 0.808 |      | 0.10      |         | 1.00   | 11       | 0         | 2017      | 2020     |
| PRPF8      | 10594     | Q6P2Q9        | Pre-mrna processing factor 8                                                               | Nucleic acid binding       | 70           | 0.631 | 0.615 | 1.00 | 0.10      |         | 1.00   | 1        | 1         | 2018      | 2018     |
| DINOL      | 108783646 |               | Damage induced long noncoding RNA                                                          |                            | 10           | 0.821 | 0.346 |      | 0.10      |         | 1.00   | 1        | 1         | 2018      | 2018     |
| CHD3       | 1107      | Q12873        | Chromodomain helicase DNA binding protein 3                                                |                            | 55           | 0.67  | 0.577 | 1.00 | 0.10      |         | 1.00   | 1        | 1         | 2015      | 2015     |
| FAF1       | 11124     | Q9UNN5        | Fas associated factor 1                                                                    |                            | 49           | 0.666 | 0.731 | 1.00 | 0.10      |         | 1.00   | 1        | 1         | 2016      | 2016     |
| PMF1       | 11243     | Q6P1K2        | Polyamine modulated factor 1                                                               |                            | 11           | 0.839 | 0.192 | 0.00 | 0.10      |         | 1.00   | 1        | 1         | 2018      | 2018     |
| NLRP3      | 114548    | Q96P20        | NLR family pyrin domain containing 3                                                       |                            | 805          | 0.361 | 0.962 | 0.00 | 0.10      |         | 1.00   | 11       | 2         | 2016      | 2019     |
| APOA5      | 116519    | Q6Q788        | Apolipoprotein A5                                                                          |                            | 107          | 0.587 | 0.615 | 0.00 | 0.10      |         | 0.91   | 11       | 4         | 2006      | 2018     |
| AGBL1      | 123624    | Q96MI9        | ATP/GTP binding protein like 1                                                             | Enzyme                     | 15           | 0.78  | 0.231 | 0.00 | 0.10      |         | 1.00   | 1        | 1         | 2015      | 2015     |
| CRP        | 1401      | P02741        | C-reactive protein                                                                         |                            | 1483         | 0.299 | 0.962 | 0.00 | 0.10      |         | 1.00   | 48       | 7         | 2005      | 2020     |
| CYP2C19    | 1557      | P33261        | Cytochrome P450 family 2 subfamily C member 19                                             |                            | 274          | 0.467 | 0.846 | 0.00 | 0.10      |         | 0.93   | 15       | 0         | 2013      | 2019     |
| DAB1       | 1600      | O75553        | DAB adaptor protein 1                                                                      | Signaling                  | 81           | 0.626 | 0.615 | 1.00 | 0.10      |         | 1.00   | 1        | 1         | 2016      | 2016     |
| ACE        | 1636      | P12821        | Angiotensin I converting enzyme                                                            | Enzyme                     | 1082         | 0.328 | 0.923 | 0.00 | 0.10      |         | 0.86   | 42       | 6         | 1995      | 2019     |
| AGT        | 183       | P01019        | Angiotensinogen                                                                            | Enzyme modulator           | 765          | 0.367 | 0.923 | 0.00 | 0.10      |         | 1.00   | 14       | 2         | 2007      | 2019     |
| AGTR1      | 185       | P30556        | Angiotensin II receptor type 1                                                             | G-protein coupled receptor | 440          | 0.423 | 0.846 | 0.46 | 0.10      |         | 0.92   | 12       | 3         | 2004      | 2020     |
| EDN1       | 1906      | P05305        | Endothelin 1                                                                               | Signaling                  | 679          | 0.38  | 0.846 | 0.46 | 0.10      |         | 1.00   | 11       | 1         | 2014      | 2019     |
| ELN        | 2006      | P15502        | Elastin                                                                                    |                            | 545          | 0.415 | 0.885 | 0.00 | 0.10      |         |        | 0        | 0         |           |          |
| ENG        | 2022      | P17813        | Endoglin                                                                                   |                            | 371          | 0.446 | 0.846 | 1.00 | 0.10      |         |        | 0        | 0         |           |          |
| FBN1       | 2200      | P35555        | Fibrillin 1                                                                                | Calcium-binding protein    | 552          | 0.417 | 0.846 |      | 0.10      |         |        | 0        | 1         |           |          |
| FGB        | 2244      | P02675        | Fibrinogen $\beta$ chain                                                                   | Signaling                  | 95           | 0.584 | 0.692 | 0.57 | 0.10      |         | 0.94   | 18       | 3         | 1997      | 2019     |
| FOXE3      | 2301      | Q13461        | Forkhead box E3                                                                            | Transcription factor       | 118          | 0.568 | 0.654 | 0.18 | 0.10      |         |        | 0        | 0         |           |          |
| LRCH1      | 23143     | Q9Y2L9        | Leucine rich repeats and calponin homology domain containing 1                             |                            | 19           | 0.769 | 0.269 | 1.00 | 0.10      |         | 1.00   | 1        | 1         | 2018      | 2018     |
| TSPAN15    | 23555     | O95858        | Tetraspanin 15                                                                             |                            | 17           | 0.78  | 0.346 | 0.01 | 0.10      |         | 1.00   | 1        | 1         | 2016      | 2016     |
| ALOX5      | 240       | P09917        | Arachidonate 5-lipoxygenase                                                                | Enzyme                     | 342          | 0.447 | 0.885 | 0.00 | 0.10      |         | 1.00   | 14       | 3         | 2005      | 2017     |
| ALOX5AP    | 241       | P20292        | Arachidonate 5-lipoxygenase activating protein                                             | Enzyme                     | 76           | 0.612 | 0.731 | 0.07 | 0.10      |         | 0.86   | 28       | 10        | 2005      | 2019     |
| NAALADL2   | 254827    | Q58DX5        | N-acetylated $\alpha$ -linked acidic dipeptidase like 2                                    | Enzyme                     | 19           | 0.729 | 0.577 | 0.00 | 0.10      |         | 1.00   | 1        | 1         | 2019      | 2019     |
| PCSK9      | 255738    | Q8NBP7        | Proprotein convertase subtilisin/kexin type 9                                              | Enzyme                     | 257          | 0.482 | 0.808 | 0.00 | 0.10      |         | 1.00   | 10       | 3         | 2007      | 2020     |
| SLC26A11   | 284129    | Q86WA9        | Solute carrier family 26 member 11                                                         | Transporter                | 5            | 0.89  | 0.269 | 0.00 | 0.10      |         | 1.00   | 1        | 1         | 2016      | 2016     |
| F11-AS1    | 285441    |               | F11 antisense RNA 1                                                                        |                            | 15           | 0.805 | 0.308 |      | 0.10      |         | 1.00   | 1        | 1         | 2016      | 2016     |
| APOB       | 338       | P04114        | Apolipoprotein B                                                                           |                            | 339          | 0.453 | 0.808 | 0.00 | 0.10      |         | 0.91   | 11       | 7         | 1997      | 2020     |
| TSPAN33    | 340348    | Q86UF1        | Tetraspanin 33                                                                             |                            | 69           | 0.606 | 0.731 | 0.00 | 0.10      |         | 1.00   | 26       | 0         | 2004      | 2020     |
| APOE       | 348       | P02649        | Apolipoprotein E                                                                           |                            | 1049         | 0.338 | 0.962 | 0.00 | 0.10      |         | 0.93   | 45       | 4         | 1997      | 2019     |
| IL1B       | 3553      | P01584        | Interleukin 1 $\beta$                                                                      |                            | 1801         | 0.276 | 0.962 | 0.13 | 0.10      |         | 0.83   | 18       | 0         | 2004      | 2019     |
| IL1RN      | 3557      | P18510        | Interleukin 1 receptor antagonist                                                          |                            | 701          | 0.373 | 0.923 | 0.03 | 0.10      |         | 0.91   | 11       | 0         | 2003      | 2018     |
| IL6        | 3569      | P05231        | Interleukin 6                                                                              |                            | 2367         | 0.248 | 0.962 | 0.32 | 0.10      |         | 0.86   | 35       | 2         | 2001      | 2020     |
| IL10       | 3586      | P22301        | Interleukin 10                                                                             |                            | 1679         | 0.281 | 0.923 | 0.01 | 0.10      |         | 0.88   | 17       | 3         | 2010      | 2020     |
| ILF3       | 3609      | Q12906        | Interleukin enhancer binding factor 3                                                      | Nucleic acid binding       | 68           | 0.621 | 0.654 | 1.00 | 0.10      |         | 1.00   | 1        | 1         | 2018      | 2018     |
| KCNK1      | 3775      | O00180        | Potassium two pore domain channel subfamily K member 1                                     | Ion channel                | 14           | 0.76  | 0.462 | 0.03 | 0.10      |         | 1.00   | 1        | 1         | 2016      | 2016     |
| KCNK3      | 3777      | O14649        | Potassium two pore domain channel subfamily K member 3                                     | Ion channel                | 93           | 0.584 | 0.654 | 0.90 | 0.10      |         | 1.00   | 1        | 1         | 2018      | 2018     |
| C10orf143  | 387723    | A0A1B0GUT2    | Chromosome 10 open reading frame 143                                                       |                            | 16           | 0.78  | 0.269 |      | 0.10      |         | 1.00   | 1        | 1         | 2016      | 2016     |

|          |        |        |                                                                                                   |                            |      |       |       |      |      |  |      |    |    |      |      |
|----------|--------|--------|---------------------------------------------------------------------------------------------------|----------------------------|------|-------|-------|------|------|--|------|----|----|------|------|
| LPA      | 4018   | P08519 | Lipoprotein(a)                                                                                    | Enzyme                     | 340  | 0.444 | 0.769 | 0.00 | 0.10 |  | 1.00 | 19 | 0  | 1992 | 2020 |
| LPL      | 4023   | P06858 | Lipoprotein lipase                                                                                | Enzyme                     | 290  | 0.474 | 0.808 | 0.00 | 0.10 |  | 0.82 | 11 | 1  | 1997 | 2018 |
| MIR146A  | 406938 |        | Microma 146a                                                                                      |                            | 505  | 0.398 | 0.885 |      | 0.10 |  | 0.77 | 13 | 1  | 2014 | 2018 |
| MAT2A    | 4144   | P31153 | Methionine adenosyltransferase 2A                                                                 | Enzyme                     | 81   | 0.615 | 0.654 | 1.00 | 0.10 |  |      | 0  | 0  |      |      |
| MMP9     | 4318   | P14780 | Matrix metallopeptidase 9                                                                         | Enzyme                     | 1337 | 0.305 | 0.923 | 0.00 | 0.10 |  | 0.93 | 29 | 2  | 2010 | 2020 |
| MTHFR    | 4524   | P42898 | Methylenetetrahydrofolate reductase                                                               |                            | 985  | 0.337 | 0.885 | 0.00 | 0.10 |  | 0.95 | 76 | 8  | 1998 | 2019 |
| MYH11    | 4629   | P35749 | Myosin heavy chain 11                                                                             |                            | 161  | 0.528 | 0.731 | 0.77 | 0.10 |  |      | 0  | 0  |      |      |
| MYLK     | 4638   | Q15746 | Myosin light chain kinase                                                                         | Kinase                     | 199  | 0.51  | 0.846 | 0.00 | 0.10 |  |      | 0  | 0  |      |      |
| NINJ2    | 4815   | Q9NZG7 | Ninjurin 2                                                                                        | Cell adhesion              | 20   | 0.751 | 0.269 | 0.00 | 0.10 |  | 1.00 | 11 | 1  | 2011 | 2019 |
| NOS3     | 4846   | P29474 | Nitric oxide synthase 3                                                                           |                            | 706  | 0.378 | 0.885 | 0.00 | 0.10 |  | 0.92 | 38 | 4  | 1998 | 2019 |
| SERPINE1 | 5054   | P05121 | Serpin family E member 1                                                                          | Enzyme modulator           | 770  | 0.359 | 0.885 | 0.04 | 0.10 |  | 0.79 | 24 | 2  | 2002 | 2020 |
| PCDH7    | 5099   | O60245 | Protocadherin 7                                                                                   |                            | 35   | 0.663 | 0.462 | 0.40 | 0.10 |  | 1.00 | 1  | 1  | 2016 | 2016 |
| PCYT1A   | 5130   | P49585 | Phosphate cytidylyltransferase 1, choline, $\alpha$                                               |                            | 256  | 0.485 | 0.885 | 0.00 | 0.10 |  | 1.00 | 11 | 0  | 2017 | 2020 |
| PDE4D    | 5144   | Q08499 | Phosphodiesterase 4D                                                                              |                            | 210  | 0.519 | 0.846 | 1.00 | 0.10 |  | 0.89 | 52 | 10 | 2003 | 2020 |
| PIK3CA   | 5290   | P42336 | Phosphatidylinositol-4,5-bisphosphate 3-kinase catalytic subunit $\alpha$                         | Kinase                     | 1511 | 0.292 | 0.923 | 1.00 | 0.10 |  | 1.00 | 11 | 0  | 2016 | 2019 |
| PIK3CB   | 5291   | P42338 | Phosphatidylinositol-4,5-bisphosphate 3-kinase catalytic subunit $\beta$                          | Kinase                     | 1083 | 0.322 | 0.885 | 1.00 | 0.10 |  | 1.00 | 11 | 0  | 2016 | 2019 |
| PIK3CD   | 5293   | O00329 | Phosphatidylinositol-4,5-bisphosphate 3-kinase catalytic subunit $\delta$                         | Kinase                     | 1119 | 0.319 | 0.885 | 1.00 | 0.10 |  | 1.00 | 11 | 0  | 2016 | 2019 |
| PIK3CG   | 5294   | P48736 | Phosphatidylinositol-4,5-bisphosphate 3-kinase catalytic subunit $\gamma$                         | Kinase                     | 1101 | 0.32  | 0.885 | 0.00 | 0.10 |  | 1.00 | 13 | 0  | 2016 | 2019 |
| PLAT     | 5327   | P00750 | Plasminogen activator, tissue type                                                                | Enzyme                     | 392  | 0.445 | 0.885 | 0.00 | 0.10 |  | 0.99 | 75 | 1  | 2004 | 2020 |
| PLG      | 5340   | P00747 | Plasminogen                                                                                       | Enzyme                     | 586  | 0.389 | 0.923 | 0.01 | 0.10 |  | 0.93 | 14 | 0  | 2001 | 2020 |
| PON1     | 5444   | P27169 | Paraoxonase 1                                                                                     |                            | 496  | 0.409 | 0.885 | 0.00 | 0.10 |  | 0.84 | 19 | 3  | 2004 | 2019 |
| PPARG    | 5468   | P37231 | Peroxisome proliferator activated receptor $\gamma$                                               | Nuclear receptor           | 877  | 0.358 | 0.885 | 0.03 | 0.10 |  | 1.00 | 13 | 4  | 2007 | 2020 |
| CASZ1    | 54897  | Q86V15 | Castor zinc finger 1                                                                              | Transcription factor       | 132  | 0.553 | 0.731 | 1.00 | 0.10 |  | 1.00 | 1  | 1  | 2018 | 2018 |
| KIF26B   | 55083  | Q2KJY2 | Kinesin family member 26B                                                                         | Cellular structure         | 38   | 0.67  | 0.5   | 1.00 | 0.10 |  | 1.00 | 1  | 1  | 2016 | 2016 |
| AVP      | 551    | P01185 | Arginine vasopressin                                                                              | Signaling                  | 454  | 0.437 | 0.846 | 0.07 | 0.10 |  | 1.00 | 10 | 0  | 2014 | 2019 |
| PROC     | 5624   | P04070 | Protein C, inactivator of coagulation factors Va and viiia                                        | Enzyme                     | 200  | 0.504 | 0.808 | 0.00 | 0.10 |  | 1.00 | 11 | 0  | 2009 | 2019 |
| SLC44A2  | 57153  | Q8IWA5 | Solute carrier family 44 member 2                                                                 | Transporter                | 21   | 0.743 | 0.462 | 0.00 | 0.10 |  | 1.00 | 1  | 1  | 2016 | 2016 |
| PTGS2    | 5743   | P35354 | Prostaglandin-endoperoxide synthase 2                                                             | Enzyme                     | 1234 | 0.314 | 0.962 | 1.00 | 0.10 |  | 0.83 | 12 | 4  | 1997 | 2019 |
| PTPRD    | 5789   | P23468 | Protein tyrosine phosphatase receptor type D                                                      | Enzyme                     | 93   | 0.584 | 0.731 | 1.00 | 0.10 |  | 1.00 | 1  | 1  | 2016 | 2016 |
| PTPRG    | 5793   | P23470 | Protein tyrosine phosphatase receptor type G                                                      | Enzyme                     | 70   | 0.619 | 0.731 | 0.00 | 0.10 |  | 1.00 | 1  | 1  | 2015 | 2015 |
| NTN4     | 59277  | Q9HB63 | Netrin 4                                                                                          | Enzyme modulator           | 35   | 0.695 | 0.538 | 0.92 | 0.10 |  | 1.00 | 1  | 1  | 2019 | 2019 |
| BDNF     | 627    | P23560 | Brain derived neurotrophic factor                                                                 | Signaling                  | 992  | 0.345 | 0.923 | 0.66 | 0.10 |  | 1.00 | 23 | 4  | 2010 | 2019 |
| ATXN2    | 6311   | Q99700 | Ataxin 2                                                                                          | Nucleic acid binding       | 341  | 0.482 | 0.808 | 0.85 | 0.10 |  | 1.00 | 1  | 1  | 2018 | 2018 |
| SMARCA4  | 6597   | P51532 | SWI/SNF related, matrix associated, actin dependent regulator of chromatin, subfamily a, member 4 | Epigenetic regulator       | 347  | 0.45  | 0.885 | 1.00 | 0.10 |  | 1.00 | 1  | 2  | 2018 | 2018 |
| FUNDC2   | 65991  | Q9BWH2 | FUN14 domain containing 2                                                                         |                            | 15   | 0.76  | 0.385 | 0.06 | 0.10 |  | 1.00 | 1  | 1  | 2016 | 2016 |
| SON      | 6651   | P18583 | SON DNA binding protein                                                                           |                            | 154  | 0.565 | 0.769 | 1.00 | 0.10 |  |      | 0  | 0  |      |      |
| STAT3    | 6774   | P40763 | Signal transducer and activator of transcription 3                                                | Nucleic acid binding       | 1193 | 0.32  | 0.923 | 1.00 | 0.10 |  | 1.00 | 13 | 0  | 2015 | 2020 |
| TGFB2    | 7042   | P61812 | Transforming growth factor $\beta$ 2                                                              | Signaling                  | 389  | 0.433 | 0.885 | 1.00 | 0.10 |  |      | 0  | 0  |      |      |
| TGFB3    | 7043   | P10600 | Transforming growth factor $\beta$ 3                                                              | Signaling                  | 230  | 0.498 | 0.808 | 0.99 | 0.10 |  |      | 0  | 0  |      |      |
| TGFBR1   | 7046   | P36897 | Transforming growth factor $\beta$ receptor 1                                                     | Kinase                     | 347  | 0.451 | 0.885 | 0.85 | 0.10 |  |      | 0  | 0  |      |      |
| TLR4     | 7099   | O00206 | Toll like receptor 4                                                                              |                            | 1174 | 0.321 | 0.962 | 0.00 | 0.10 |  | 0.92 | 13 | 5  | 2005 | 2020 |
| TNF      | 7124   | P01375 | Tumor necrosis factor                                                                             | Signaling                  | 2724 | 0.231 | 0.962 | 0.80 | 0.10 |  | 0.96 | 27 | 1  | 2001 | 2019 |
| VEGFA    | 7422   | P15692 | Vascular endothelial growth factor A                                                              | Signaling                  | 1899 | 0.266 | 0.923 | 0.00 | 0.10 |  | 1.00 | 11 | 1  | 1997 | 2019 |
| VWF      | 7450   | P04275 | Von Willebrand factor                                                                             | Enzyme modulator           | 498  | 0.408 | 0.885 | 0.00 | 0.10 |  | 1.00 | 13 | 0  | 2001 | 2019 |
| MFAP5    | 8076   | Q13361 | Microfibril associated protein 5                                                                  |                            | 92   | 0.59  | 0.615 | 0.01 | 0.10 |  |      | 0  | 0  |      |      |
| SLC2A10  | 81031  | O95528 | Solute carrier family 2 member 10                                                                 | Transporter                | 135  | 0.55  | 0.615 | 0.00 | 0.10 |  |      | 0  | 0  |      |      |
| QRICH2   | 84074  | Q9H0J4 | Glutamine rich 2                                                                                  |                            | 10   | 0.861 | 0.308 | 0.00 | 0.10 |  | 1.00 | 1  | 1  | 2016 | 2016 |
| RUNX1    | 861    | Q01196 | RUNX family transcription factor 1                                                                | Transcription factor       | 412  | 0.425 | 0.808 | 0.65 | 0.10 |  | 1.00 | 1  | 1  | 2019 | 2019 |
| ALDH1A2  | 8854   | O94788 | Aldehyde dehydrogenase 1 family member A2                                                         | Enzyme                     | 109  | 0.578 | 0.692 | 0.36 | 0.10 |  | 1.00 | 1  | 1  | 2015 | 2015 |
| HPS4     | 89781  | Q9NQG7 | HPS4 biogenesis of lysosomal organelles complex 3 subunit 2                                       |                            | 26   | 0.743 | 0.385 | 0.00 | 0.10 |  | 1.00 | 1  | 1  | 2015 | 2015 |
| COX7A2L  | 9167   | O14548 | Cytochrome c oxidase subunit 7A2 like                                                             | Enzyme                     | 23   | 0.736 | 0.385 | 0.00 | 0.10 |  | 1.00 | 1  | 1  | 2016 | 2016 |
| ADIPOQ   | 9370   | Q15848 | Adiponectin, C1Q and collagen domain containing                                                   |                            | 679  | 0.376 | 0.885 | 0.00 | 0.10 |  | 0.93 | 14 | 10 | 2006 | 2019 |
| PLAA     | 9373   | Q9Y263 | Phospholipase A2 activating protein                                                               | Enzyme modulator           | 113  | 0.597 | 0.692 | 0.47 | 0.10 |  | 1.00 | 1  | 1  | 2019 | 2019 |
| ACVRL1   | 94     | P37023 | Activin A receptor like type 1                                                                    | Kinase                     | 224  | 0.493 | 0.769 | 0.00 | 0.10 |  |      | 0  | 0  |      |      |
| CDC5L    | 988    | Q99459 | Cell division cycle 5 like                                                                        |                            | 21   | 0.743 | 0.385 | 1.00 | 0.10 |  | 1.00 | 1  | 1  | 2015 | 2015 |
| EPO      | 2056   | P01588 | Erythropoietin                                                                                    |                            | 646  | 0.381 | 0.885 | 0.01 | 0.09 |  | 1.00 | 9  | 0  | 2004 | 2019 |
| HMGB1    | 3146   | P09429 | High mobility group box 1                                                                         | Nucleic acid binding       | 724  | 0.368 | 0.923 | 0.82 | 0.09 |  | 1.00 | 9  | 1  | 2013 | 2020 |
| MMP3     | 4314   | P08254 | Matrix metallopeptidase 3                                                                         | Enzyme                     | 473  | 0.408 | 0.885 | 0.00 | 0.09 |  | 0.89 | 9  | 2  | 2012 | 2018 |
| MIR499A  | 574501 |        | Microma 499a                                                                                      |                            | 156  | 0.519 | 0.846 |      | 0.09 |  | 0.78 | 9  | 1  | 2013 | 2019 |
| SELP     | 6403   | P16109 | Selectin P                                                                                        |                            | 293  | 0.46  | 0.769 | 0.00 | 0.09 |  | 0.89 | 9  | 2  | 2006 | 2019 |
| PLA2G7   | 7941   | Q13093 | Phospholipase A2 group VII                                                                        | Enzyme                     | 136  | 0.537 | 0.769 | 0.00 | 0.09 |  | 0.89 | 9  | 2  | 2011 | 2020 |
| CYP4F2   | 8529   | P78329 | Cytochrome P450 family 4 subfamily F member 2                                                     | Enzyme                     | 44   | 0.674 | 0.308 | 0.00 | 0.09 |  | 1.00 | 9  | 7  | 2008 | 2019 |
| IGF1     | 3479   | P05019 | Insulin like growth factor 1                                                                      |                            | 1206 | 0.318 | 0.885 | 0.27 | 0.08 |  | 1.00 | 8  | 1  | 2013 | 2020 |
| CXCL8    | 3576   | P10145 | C-X-C motif chemokine ligand 8                                                                    | Signaling                  | 1254 | 0.31  | 0.962 | 0.00 | 0.08 |  | 1.00 | 8  | 0  | 1999 | 2019 |
| IL17A    | 3605   | Q16552 | Interleukin 17A                                                                                   |                            | 1074 | 0.324 | 0.923 | 0.04 | 0.08 |  | 1.00 | 8  | 1  | 1999 | 2019 |
| AQP4     | 361    | P55087 | Aquaporin 4                                                                                       | Ion channel                | 311  | 0.456 | 0.885 | 0.00 | 0.08 |  | 1.00 | 8  | 0  | 2015 | 2020 |
| LTA      | 4049   | P01374 | Lymphotoxin $\alpha$                                                                              | Signaling                  | 353  | 0.434 | 0.885 | 0.20 | 0.08 |  | 1.00 | 8  | 1  | 2005 | 2016 |
| NFE2L2   | 4780   | Q16236 | Nuclear factor, erythroid 2 like 2                                                                | Enzyme                     | 823  | 0.357 | 0.885 | 0.00 | 0.08 |  | 1.00 | 8  | 0  | 2017 | 2020 |
| P2RY12   | 64805  | Q9H244 | Purinergic receptor P2Y12                                                                         | G-protein coupled receptor | 153  | 0.533 | 0.731 |      | 0.08 |  | 0.88 | 8  | 1  | 2008 | 2019 |
| EPHX2    | 2053   | P34913 | Epoxide hydrolase 2                                                                               | Enzyme                     | 97   | 0.568 | 0.654 | 0.00 | 0.07 |  | 0.86 | 7  | 3  | 2005 | 2017 |
| ESR1     | 2099   | P03372 | Estrogen receptor 1                                                                               | Nuclear receptor           | 1101 | 0.324 | 0.962 | 1.00 | 0.07 |  | 0.71 | 7  | 2  | 2007 | 2016 |
| FGFR1    | 2260   | P11362 | Fibroblast growth factor receptor 1                                                               | Kinase                     | 816  | 0.362 | 0.885 | 1.00 | 0.07 |  | 1.00 | 7  | 0  | 2017 | 2020 |
| MMRN1    | 22915  | Q13201 | Multimerin 1                                                                                      |                            | 272  | 0.465 | 0.846 | 0.00 | 0.07 |  | 1.00 | 7  | 0  | 2000 | 2017 |

|           |           |               |                                                          |                      |      |       |       |      |      |  |      |   |   |      |      |
|-----------|-----------|---------------|----------------------------------------------------------|----------------------|------|-------|-------|------|------|--|------|---|---|------|------|
| GABPA     | 2551      | Q06546        | GA binding protein transcription factor subunit $\alpha$ | Transcription factor | 632  | 0.379 | 0.885 | 1.00 | 0.07 |  | 1.00 | 7 | 0 | 2017 | 2020 |
| HIF1A     | 3091      | Q16665        | Hypoxia inducible factor 1 subunit $\alpha$              | Transcription factor | 1044 | 0.327 | 0.923 | 0.98 | 0.07 |  | 1.00 | 7 | 0 | 2017 | 2019 |
| IL1A      | 3552      | P01583        | Interleukin 1 $\alpha$                                   |                      | 1002 | 0.333 | 0.962 | 0.00 | 0.07 |  | 0.86 | 7 | 1 | 2006 | 2019 |
| MIR126    | 406913    |               | Microrna 126                                             |                      | 305  | 0.447 | 0.846 |      | 0.07 |  | 1.00 | 7 | 1 | 2013 | 2020 |
| MIR145    | 406937    |               | Microrna 145                                             |                      | 366  | 0.431 | 0.846 |      | 0.07 |  | 1.00 | 7 | 1 | 2012 | 2019 |
| OLR1      | 4973      | P78380        | Oxidized low density lipoprotein receptor 1              |                      | 133  | 0.544 | 0.769 | 0.01 | 0.07 |  | 1.00 | 7 | 1 | 2006 | 2020 |
| CCL2      | 6347      | P13500        | C-C motif chemokine ligand 2                             | Signaling            | 1157 | 0.321 | 0.962 | 0.61 | 0.07 |  | 1.00 | 7 | 1 | 2010 | 2019 |
| CXCL12    | 6387      | P48061        | C-X-C motif chemokine ligand 12                          |                      | 626  | 0.379 | 0.846 | 0.12 | 0.07 |  | 1.00 | 7 | 0 | 2017 | 2020 |
| SELE      | 6401      | P16581        | Selectin E                                               |                      | 327  | 0.447 | 0.808 | 0.00 | 0.07 |  | 1.00 | 7 | 3 | 2009 | 2017 |
| CDKN2A    | 1029      | P42771;Q8N726 | Cyclin dependent kinase inhibitor 2A                     |                      | 1314 | 0.3   | 0.885 | 0.39 | 0.06 |  | 1.00 | 6 | 1 | 2009 | 2018 |
| CETP      | 1071      | P11597        | Cholesteryl ester transfer protein                       |                      | 188  | 0.512 | 0.731 | 0.00 | 0.06 |  | 0.67 | 6 | 2 | 2005 | 2018 |
| CYP11B2   | 1585      | P19099        | Cytochrome P450 family 11 subfamily B member 2           |                      | 142  | 0.553 | 0.615 | 0.00 | 0.06 |  | 1.00 | 6 | 1 | 2010 | 2015 |
| AGER      | 177       | Q15109        | Advanced glycosylation end-product specific receptor     | Receptor             | 450  | 0.42  | 0.885 | 0.00 | 0.06 |  | 1.00 | 6 | 1 | 2006 | 2017 |
| SIRT1     | 23411     | Q96EB6        | Sirtuin 1                                                | Epigenetic regulator | 675  | 0.378 | 0.885 | 0.09 | 0.06 |  | 1.00 | 6 | 0 | 2017 | 2018 |
| ICAM1     | 3383      | P05362        | Intercellular adhesion molecule 1                        |                      | 737  | 0.364 | 0.962 | 0.04 | 0.06 |  | 1.00 | 6 | 1 | 2003 | 2019 |
| IL18      | 3606      | Q14116        | Interleukin 18                                           |                      | 750  | 0.365 | 0.923 | 0.03 | 0.06 |  | 1.00 | 6 | 2 | 2010 | 2019 |
| ITGA2     | 3673      | P17301        | Integrin subunit $\alpha$ 2                              |                      | 166  | 0.522 | 0.731 | 0.00 | 0.06 |  | 0.83 | 6 | 1 | 2007 | 2019 |
| JAK2      | 3717      | O60674        | Janus kinase 2                                           | Kinase               | 644  | 0.385 | 0.885 | 0.65 | 0.06 |  | 1.00 | 6 | 1 | 2010 | 2019 |
| MIR223    | 407008    |               | Microma 223                                              |                      | 348  | 0.433 | 0.808 |      | 0.06 |  | 1.00 | 6 | 0 | 2014 | 2019 |
| TNFRSF11B | 4982      | O00300        | TNF receptor superfamily member 11b                      |                      | 443  | 0.422 | 0.808 | 0.16 | 0.06 |  | 1.00 | 6 | 2 | 2013 | 2019 |
| TREM2     | 54209     | Q9NZC2        | Triggering receptor expressed on myeloid cells 2         |                      | 239  | 0.519 | 0.769 | 0.00 | 0.06 |  | 0.83 | 6 | 1 | 2013 | 2019 |
| PTGS1     | 5742      | P23219        | Prostaglandin-endoperoxide synthase 1                    | Enzyme               | 318  | 0.46  | 0.885 | 0.00 | 0.06 |  | 0.83 | 6 | 3 | 2003 | 2019 |
| TGFB1     | 7040      | P01137        | Transforming growth factor $\beta$ 1                     | Signaling            | 1558 | 0.287 | 0.962 | 0.04 | 0.06 |  | 0.83 | 6 | 1 | 1997 | 2020 |
| CASP3     | 836       | P42574        | Caspase 3                                                | Enzyme               | 819  | 0.351 | 0.923 | 0.10 | 0.06 |  | 1.00 | 6 | 0 | 2017 | 2019 |
| PPIG      | 9360      | Q13427        | Peptidylprolyl isomerase G                               |                      | 203  | 0.497 | 0.846 | 0.96 | 0.06 |  | 1.00 | 6 | 0 | 2016 | 2017 |
| SIGMAR1   | 10280     | Q99720        | $\Sigma$ non-opioid intracellular receptor 1             |                      | 190  | 0.544 | 0.808 | 0.17 | 0.05 |  | 1.00 | 5 | 0 | 2014 | 2020 |
| CPB2      | 1361      | Q96IY4        | Carboxypeptidase B2                                      | Enzyme               | 148  | 0.536 | 0.846 | 0.00 | 0.05 |  | 1.00 | 5 | 2 | 2005 | 2018 |
| ABCA1     | 19        | O95477        | ATP binding cassette subfamily A member 1                | Transporter          | 291  | 0.467 | 0.846 | 0.00 | 0.05 |  | 1.00 | 5 | 3 | 2007 | 2019 |
| MTOR      | 2475      | P42345        | Mechanistic target of rapamycin kinase                   | Kinase               | 960  | 0.343 | 0.885 | 1.00 | 0.05 |  | 1.00 | 5 | 0 | 2016 | 2019 |
| GPX3      | 2878      | P22352        | Glutathione peroxidase 3                                 | Enzyme               | 156  | 0.522 | 0.769 | 0.05 | 0.05 |  | 1.00 | 5 | 0 | 2007 | 2017 |
| IL4       | 3565      | P05112        | Interleukin 4                                            |                      | 996  | 0.332 | 0.962 | 0.00 | 0.05 |  | 1.00 | 5 | 2 | 2011 | 2019 |
| LGALS3    | 3958      | P17931        | Galectin 3                                               | Signaling            | 557  | 0.392 | 0.846 | 0.00 | 0.05 |  | 1.00 | 5 | 0 | 2017 | 2019 |
| MMP1      | 4312      | P03956        | Matrix metallopeptidase 1                                | Enzyme               | 589  | 0.385 | 0.885 | 0.00 | 0.05 |  | 0.60 | 5 | 0 | 2014 | 2018 |
| MMP2      | 4313      | P08253        | Matrix metallopeptidase 2                                | Enzyme               | 1021 | 0.333 | 0.923 | 0.84 | 0.05 |  | 0.80 | 5 | 1 | 2015 | 2018 |
| NGF       | 4803      | P01138        | Nerve growth factor                                      | Signaling            | 616  | 0.391 | 0.885 | 0.82 | 0.05 |  | 1.00 | 5 | 1 | 2017 | 2019 |
| GP6       | 51206     | Q9HCN6        | Glycoprotein VI platelet                                 | Receptor             | 89   | 0.597 | 0.615 | 0.00 | 0.05 |  | 1.00 | 5 | 1 | 2003 | 2019 |
| ABCB1     | 5243      | P08183        | ATP binding cassette subfamily B member 1                | Transporter          | 933  | 0.344 | 0.885 | 0.00 | 0.05 |  | 1.00 | 5 | 2 | 2012 | 2019 |
| PRKCH     | 5583      | P24723        | Protein kinase C $\eta$                                  | Kinase               | 55   | 0.653 | 0.577 | 0.43 | 0.05 |  | 1.00 | 5 | 2 | 2009 | 2015 |
| MAPK3     | 5595      | P27361        | Mitogen-activated protein kinase 3                       | Kinase               | 647  | 0.379 | 0.885 | 0.04 | 0.05 |  | 1.00 | 5 | 0 | 2017 | 2019 |
| RETN      | 56729     | Q9HD89        | Resistin                                                 |                      | 302  | 0.454 | 0.808 | 0.04 | 0.05 |  | 1.00 | 5 | 0 | 2016 | 2020 |
| BRCA1     | 672       | P38398        | BRCA1 DNA repair associated                              | Enzyme               | 747  | 0.367 | 0.923 | 0.00 | 0.05 |  | 1.00 | 5 | 0 | 2013 | 2020 |
| THBD      | 7056      | P07204        | Thrombomodulin                                           |                      | 303  | 0.457 | 0.769 | 0.05 | 0.05 |  | 1.00 | 5 | 2 | 2001 | 2018 |
| TP53      | 7157      | P04637        | Tumor protein p53                                        | Transcription factor | 2494 | 0.236 | 0.962 | 0.53 | 0.05 |  | 1.00 | 5 | 0 | 2004 | 2019 |
| APLN      | 8862      | Q9ULZ1        | Apelin                                                   |                      | 226  | 0.497 | 0.769 | 0.46 | 0.05 |  | 1.00 | 5 | 0 | 2017 | 2019 |
| KALRN     | 8997      | O60229        | Kalirin rhogef kinase                                    | Kinase               | 59   | 0.644 | 0.654 | 1.00 | 0.05 |  | 0.60 | 5 | 4 | 2010 | 2018 |
| KL        | 9365      | Q9UEF7        | Klotho                                                   | Enzyme               | 332  | 0.448 | 0.769 | 0.00 | 0.05 |  | 1.00 | 5 | 0 | 2006 | 2020 |
| HDAC6     | 10013     | Q9UBN7        | Histone deacetylase 6                                    | Epigenetic regulator | 288  | 0.465 | 0.846 | 1.00 | 0.04 |  | 1.00 | 4 | 0 | 2017 | 2020 |
| CDKN2B    | 1030      | P42772        | Cyclin dependent kinase inhibitor 2B                     |                      | 440  | 0.417 | 0.769 | 0.01 | 0.04 |  | 1.00 | 4 | 0 | 2009 | 2017 |
| MTCO2P12  | 107075310 |               | MT-CO2 pseudogene 12                                     |                      | 703  | 0.368 | 0.962 |      | 0.04 |  | 0.75 | 4 | 0 | 1997 | 2019 |
| COL4A2    | 1284      | P08572        | Collagen type IV $\alpha$ 2 chain                        |                      | 131  | 0.563 | 0.654 | 0.00 | 0.04 |  | 0.75 | 4 | 2 | 2015 | 2019 |
| COX8A     | 1351      | P10176        | Cytochrome c oxidase subunit 8A                          | Enzyme               | 526  | 0.4   | 0.846 | 0.12 | 0.04 |  | 1.00 | 4 | 0 | 2006 | 2019 |
| PARP1     | 142       | P09874        | Poly(ADP-ribose) polymerase 1                            |                      | 565  | 0.389 | 0.923 | 0.00 | 0.04 |  | 1.00 | 4 | 1 | 2017 | 2018 |
| CSF3      | 1440      | P09919        | Colony stimulating factor 3                              |                      | 687  | 0.377 | 0.885 | 0.38 | 0.04 |  | 1.00 | 4 | 0 | 2015 | 2019 |
| CST3      | 1471      | P01034        | Cystatin C                                               |                      | 370  | 0.436 | 0.808 | 0.00 | 0.04 |  | 0.75 | 4 | 0 | 2018 | 2020 |
| CYP4A11   | 1579      | Q02928        | Cytochrome P450 family 4 subfamily A member 11           | Enzyme               | 34   | 0.695 | 0.462 | 0.00 | 0.04 |  | 1.00 | 4 | 1 | 2010 | 2016 |
| ENO2      | 2026      | P09104        | Enolase 2                                                | Enzyme               | 239  | 0.475 | 0.846 | 0.38 | 0.04 |  | 1.00 | 4 | 0 | 2015 | 2018 |
| F3        | 2152      | P13726        | Coagulation factor III, tissue factor                    | Receptor             | 456  | 0.415 | 0.846 | 0.02 | 0.04 |  | 1.00 | 4 | 1 | 2001 | 2017 |
| FABP4     | 2167      | P15090        | Fatty acid binding protein 4                             |                      | 194  | 0.5   | 0.808 | 0.00 | 0.04 |  | 1.00 | 4 | 0 | 2011 | 2018 |
| SIRT3     | 23410     | Q9NTG7        | Sirtuin 3                                                | Epigenetic regulator | 227  | 0.488 | 0.731 | 0.00 | 0.04 |  | 0.75 | 4 | 0 | 2017 | 2019 |
| ALOX15    | 246       | P16050        | Arachidonate 15-lipoxygenase                             | Enzyme               | 205  | 0.502 | 0.846 | 0.00 | 0.04 |  | 1.00 | 4 | 2 | 2009 | 2019 |
| ANGPT1    | 284       | Q15389        | Angiopoietin 1                                           | Signaling            | 340  | 0.446 | 0.808 | 0.95 | 0.04 |  | 1.00 | 4 | 0 | 2014 | 2019 |
| NRG1      | 3084      | Q02297        | Neuregulin 1                                             | Signaling            | 304  | 0.464 | 0.885 | 1.00 | 0.04 |  | 1.00 | 4 | 0 | 2010 | 2019 |
| HMOX1     | 3162      | P09601        | Heme oxygenase 1                                         |                      | 666  | 0.381 | 0.923 | 0.01 | 0.04 |  | 1.00 | 4 | 0 | 2010 | 2018 |
| HSPA4     | 3308      | P34932        | Heat shock protein family A (Hsp70) member 4             |                      | 550  | 0.394 | 0.923 | 1.00 | 0.04 |  | 0.75 | 4 | 0 | 2007 | 2019 |
| APOC3     | 345       | P02656        | Apolipoprotein C3                                        |                      | 153  | 0.531 | 0.731 | 0.01 | 0.04 |  | 1.00 | 4 | 2 | 2015 | 2020 |
| IFNB1     | 3456      | P01574        | Interferon $\beta$ 1                                     |                      | 426  | 0.421 | 0.846 |      | 0.04 |  | 1.00 | 4 | 2 | 2003 | 2020 |
| ITGA2B    | 3674      | P08514        | Integrin subunit $\alpha$ 2b                             |                      | 215  | 0.493 | 0.692 | 0.00 | 0.04 |  | 1.00 | 4 | 0 | 1999 | 2017 |
| ITGB3     | 3690      | P05106        | Integrin subunit $\beta$ 3                               | Receptor             | 260  | 0.485 | 0.846 | 0.00 | 0.04 |  | 0.75 | 4 | 3 | 2012 | 2019 |
| MALAT1    | 378938    |               | Metastasis associated lung adenocarcinoma transcript 1   |                      | 336  | 0.435 | 0.846 |      | 0.04 |  | 0.75 | 4 | 1 | 2017 | 2020 |
| KLK1      | 3816      | P06870        | Kallikrein 1                                             | Enzyme               | 132  | 0.533 | 0.769 | 0.00 | 0.04 |  | 1.00 | 4 | 0 | 2006 | 2019 |
| KNG1      | 3827      | P01042        | Kininogen 1                                              | Enzyme modulator     | 279  | 0.481 | 0.885 | 0.00 | 0.04 |  | 1.00 | 4 | 1 | 2015 | 2019 |
| LCN2      | 3934      | P80188        | Lipocalin 2                                              | Enzyme               | 497  | 0.405 | 0.885 | 0.00 | 0.04 |  | 1.00 | 4 | 0 | 2018 | 2019 |
| LEP       | 3952      | P41159        | Leptin                                                   |                      | 931  | 0.349 | 0.846 | 0.46 | 0.04 |  | 1.00 | 4 | 0 | 2016 | 2019 |
| MIR122    | 406906    |               | Microrna 122                                             |                      | 250  | 0.468 | 0.808 |      | 0.04 |  | 0.75 | 4 | 1 | 2016 | 2020 |
| MIR143    | 406935    |               | Microrna 143                                             |                      | 267  | 0.462 | 0.885 |      | 0.04 |  | 0.75 | 4 | 2 | 2016 | 2019 |
| MIR149    | 406941    |               | Microrna 149                                             |                      | 140  | 0.524 | 0.769 |      | 0.04 |  | 0.25 | 4 | 1 | 2015 | 2018 |

|           |        |               |                                                          |                            |      |       |       |      |      |  |      |   |   |      |      |
|-----------|--------|---------------|----------------------------------------------------------|----------------------------|------|-------|-------|------|------|--|------|---|---|------|------|
| MMP12     | 4321   | P39900        | Matrix metallopeptidase 12                               | Enzyme                     | 216  | 0.484 | 0.885 |      | 0.04 |  | 0.75 | 4 | 1 | 2014 | 2018 |
| MPO       | 4353   | P05164        | Myeloperoxidase                                          | Enzyme                     | 653  | 0.377 | 0.923 | 0.00 | 0.04 |  | 1.00 | 4 | 1 | 2017 | 2019 |
| COX2      | 4513   | P00403        | Cytochrome c oxidase subunit II                          | Enzyme                     | 875  | 0.352 | 0.962 |      | 0.04 |  | 0.75 | 4 | 0 | 1997 | 2019 |
| SERPINC1  | 462    | P01008        | Serpin family C member 1                                 | Enzyme modulator           | 184  | 0.507 | 0.769 | 1.00 | 0.04 |  | 1.00 | 4 | 0 | 1989 | 2017 |
| NEFL      | 4747   | P07196        | Neurofilament light                                      |                            | 247  | 0.488 | 0.769 |      | 0.04 |  | 1.00 | 4 | 0 | 2018 | 2019 |
| NOS2      | 4843   | P35228        | Nitric oxide synthase 2                                  |                            | 783  | 0.364 | 0.923 | 0.00 | 0.04 |  | 1.00 | 4 | 0 | 2017 | 2019 |
| NPY       | 4852   | P01303        | Neuropeptide Y                                           | Signaling                  | 381  | 0.447 | 0.846 | 0.14 | 0.04 |  | 1.00 | 4 | 1 | 2007 | 2010 |
| PON2      | 5445   | Q15165        | Paraoxonase 2                                            |                            | 117  | 0.566 | 0.808 | 0.00 | 0.04 |  | 1.00 | 4 | 1 | 2007 | 2017 |
| PPARA     | 5465   | Q07869        | Peroxisome proliferator activated receptor $\alpha$      | Nuclear receptor           | 408  | 0.432 | 0.885 | 0.03 | 0.04 |  | 1.00 | 4 | 1 | 2013 | 2019 |
| CHDH      | 55349  | Q8NE62        | Choline dehydrogenase                                    | Enzyme                     | 158  | 0.529 | 0.769 | 0.00 | 0.04 |  | 1.00 | 4 | 0 | 2013 | 2019 |
| MAPK1     | 5594   | P28482        | Mitogen-activated protein kinase 1                       | Kinase                     | 1059 | 0.33  | 0.923 | 1.00 | 0.04 |  | 1.00 | 4 | 0 | 2009 | 2019 |
| REN       | 5972   | P00797        | Renin                                                    | Enzyme                     | 721  | 0.37  | 0.923 | 0.00 | 0.04 |  | 1.00 | 4 | 0 | 2004 | 2018 |
| SPP1      | 6696   | P10451        | Secreted phosphoprotein 1                                |                            | 824  | 0.353 | 0.885 | 0.00 | 0.04 |  | 1.00 | 4 | 0 | 2013 | 2018 |
| TRAF6     | 7189   | Q9Y4K3        | TNF receptor associated factor 6                         | Signaling                  | 254  | 0.472 | 0.808 | 1.00 | 0.04 |  | 1.00 | 4 | 2 | 2013 | 2017 |
| UCP2      | 7351   | P55851        | Uncoupling protein 2                                     | Transporter                | 235  | 0.493 | 0.808 | 0.00 | 0.04 |  | 1.00 | 4 | 0 | 2011 | 2017 |
| VKORC1    | 79001  | Q9BQB6        | Vitamin K epoxide reductase complex subunit 1            | Enzyme                     | 89   | 0.603 | 0.731 | 0.16 | 0.04 |  | 1.00 | 4 | 2 | 2008 | 2016 |
| CAV1      | 857    | Q03135        | Caveolin 1                                               | Enzyme modulator           | 633  | 0.388 | 0.885 | 0.01 | 0.04 |  | 1.00 | 4 | 0 | 2017 | 2019 |
| CBS       | 875    | P0DN79;P35520 | Cystathionine $\beta$ -synthase                          | Enzyme                     | 295  | 0.465 | 0.885 | 0.00 | 0.04 |  | 1.00 | 4 | 1 | 2001 | 2019 |
| IL33      | 90865  | O95760        | Interleukin 33                                           |                            | 487  | 0.409 | 0.885 | 0.00 | 0.04 |  | 1.00 | 4 | 4 | 2013 | 2019 |
| GDF15     | 9518   | Q99988        | Growth differentiation factor 15                         | Signaling                  | 389  | 0.429 | 0.808 | 0.00 | 0.04 |  | 1.00 | 4 | 1 | 2017 | 2020 |
| CD40      | 958    | P25942        | CD40 molecule                                            |                            | 528  | 0.396 | 0.846 | 0.85 | 0.04 |  | 1.00 | 4 | 3 | 2010 | 2019 |
| DNM1L     | 10059  | O00429        | Dynamin 1 like                                           | Enzyme modulator           | 273  | 0.475 | 0.808 | 0.00 | 0.03 |  | 1.00 | 3 | 0 | 2017 | 2018 |
| CDK5      | 1020   | Q00535        | Cyclin dependent kinase 5                                | Kinase                     | 204  | 0.495 | 0.846 | 0.14 | 0.03 |  | 1.00 | 3 | 0 | 2017 | 2018 |
| TRIB1     | 10221  | Q96RU8        | Tribbles pseudokinase 1                                  | Kinase                     | 61   | 0.617 | 0.577 | 0.83 | 0.03 |  | 1.00 | 3 | 0 | 2011 | 2019 |
| KLF2      | 10365  | Q9Y5W3        | Kruppel like factor 2                                    | Nucleic acid binding       | 132  | 0.542 | 0.692 | 0.56 | 0.03 |  | 1.00 | 3 | 0 | 2013 | 2019 |
| ADAMTS7   | 11173  | Q9UKP4        | ADAM metallopeptidase with thrombospondin type 1 motif 7 | Enzyme                     | 40   | 0.666 | 0.577 | 0.00 | 0.03 |  | 1.00 | 3 | 2 | 2019 | 2019 |
| SERPINA3  | 12     | P01011        | Serpin family A member 3                                 | Enzyme modulator           | 229  | 0.486 | 0.846 | 0.00 | 0.03 |  | 1.00 | 3 | 0 | 2000 | 2010 |
| CX3CR1    | 1524   | P49238        | C-X3-C motif chemokine receptor 1                        | G-protein coupled receptor | 310  | 0.457 | 0.885 | 0.06 | 0.03 |  | 1.00 | 3 | 0 | 2005 | 2019 |
| CYBA      | 1535   | P13498        | Cytochrome b-245 $\alpha$ chain                          |                            | 177  | 0.52  | 0.769 | 0.00 | 0.03 |  | 0.33 | 3 | 1 | 2007 | 2013 |
| CYP2C9    | 1559   | P11712        | Cytochrome P450 family 2 subfamily C member 9            |                            | 201  | 0.506 | 0.885 | 0.00 | 0.03 |  | 1.00 | 3 | 0 | 2007 | 2009 |
| CYP2J2    | 1573   | P51589        | Cytochrome P450 family 2 subfamily J member 2            |                            | 65   | 0.628 | 0.615 | 0.00 | 0.03 |  | 1.00 | 3 | 0 | 2008 | 2017 |
| DPP4      | 1803   | P27487        | Dipeptidyl peptidase 4                                   | Enzyme                     | 451  | 0.42  | 0.808 | 0.00 | 0.03 |  | 1.00 | 3 | 0 | 2017 | 2020 |
| EDNRB     | 1910   | P24530        | Endothelin receptor type B                               | G-protein coupled receptor | 300  | 0.47  | 0.846 | 0.01 | 0.03 |  | 1.00 | 3 | 2 | 2014 | 2019 |
| F2R       | 2149   | P25116        | Coagulation factor II thrombin receptor                  | G-protein coupled receptor | 347  | 0.444 | 0.846 |      | 0.03 |  | 1.00 | 3 | 0 | 2014 | 2018 |
| F11       | 2160   | P03951        | Coagulation factor XI                                    | Enzyme                     | 100  | 0.59  | 0.692 | 0.00 | 0.03 |  | 0.67 | 3 | 0 | 2013 | 2018 |
| F13A1     | 2162   | P00488        | Coagulation factor XIII A chain                          | Enzyme                     | 117  | 0.575 | 0.731 | 0.00 | 0.03 |  | 1.00 | 3 | 3 | 2002 | 2016 |
| FGA       | 2243   | P02671        | Fibrinogen $\alpha$ chain                                |                            | 118  | 0.573 | 0.769 | 0.00 | 0.03 |  | 0.67 | 3 | 3 | 2008 | 2019 |
| SIRT2     | 22933  | Q8IXJ6        | Sirtuin 2                                                | Epigenetic regulator       | 172  | 0.51  | 0.769 | 0.00 | 0.03 |  | 1.00 | 3 | 0 | 2012 | 2018 |
| POLDIP2   | 26073  | Q9Y2S7        | DNA polymerase $\delta$ interacting protein 2            |                            | 530  | 0.396 | 0.923 | 0.41 | 0.03 |  | 1.00 | 3 | 0 | 2018 | 2019 |
| GRIN2A    | 2903   | Q12879        | Glutamate ionotropic receptor NMDA type subunit 2A       | Ion channel                | 212  | 0.522 | 0.808 | 1.00 | 0.03 |  | 1.00 | 3 | 0 | 2017 | 2018 |
| GSK3B     | 2932   | P49841        | Glycogen synthase kinase 3 $\beta$                       | Kinase                     | 393  | 0.43  | 0.846 | 0.96 | 0.03 |  | 1.00 | 3 | 0 | 2017 | 2019 |
| HFE       | 3077   | Q30201        | Homeostatic iron regulator                               |                            | 415  | 0.436 | 0.846 | 0.00 | 0.03 |  | 0.67 | 3 | 2 | 2007 | 2011 |
| HLA-DRB1  | 3123   | P01911        | Major histocompatibility complex, class II, DR $\beta$ 1 | Immune response            | 1018 | 0.333 | 0.923 | 0.00 | 0.03 |  | 1.00 | 3 | 0 | 2002 | 2019 |
| APOA1     | 335    | P02647        | Apolipoprotein A1                                        |                            | 416  | 0.429 | 0.885 | 0.00 | 0.03 |  | 1.00 | 3 | 1 | 2016 | 2018 |
| IL6R      | 3570   | P08887        | Interleukin 6 receptor                                   | Signaling                  | 261  | 0.471 | 0.846 | 0.00 | 0.03 |  | 1.00 | 3 | 6 | 2015 | 2020 |
| IL13      | 3596   | P35225        | Interleukin 13                                           |                            | 587  | 0.386 | 0.846 | 0.01 | 0.03 |  | 1.00 | 3 | 0 | 2018 | 2019 |
| LGALS1    | 3956   | P09382        | Galectin 1                                               | Signaling                  | 362  | 0.435 | 0.846 | 0.00 | 0.03 |  | 1.00 | 3 | 0 | 2017 | 2018 |
| LGALS2    | 3957   | P05162        | Galectin 2                                               | Signaling                  | 27   | 0.7   | 0.385 | 0.02 | 0.03 |  | 0.67 | 3 | 0 | 2005 | 2009 |
| LIF       | 3976   | P15018        | LIF interleukin 6 family cytokine                        | Signaling                  | 236  | 0.483 | 0.769 | 0.52 | 0.03 |  | 1.00 | 3 | 0 | 2012 | 2019 |
| LTC4S     | 4056   | Q16873        | Leukotriene C4 synthase                                  | Enzyme                     | 50   | 0.647 | 0.731 | 0.00 | 0.03 |  | 1.00 | 3 | 1 | 2009 | 2012 |
| MIR130A   | 406919 |               | Microrna 130a                                            |                            | 141  | 0.522 | 0.808 |      | 0.03 |  | 1.00 | 3 | 0 | 2016 | 2019 |
| MIR137    | 406928 |               | Microrna 137                                             |                            | 171  | 0.513 | 0.846 |      | 0.03 |  | 1.00 | 3 | 0 | 2018 | 2018 |
| MIR155    | 406947 |               | Microrna 155                                             |                            | 584  | 0.384 | 0.885 |      | 0.03 |  | 1.00 | 3 | 1 | 2016 | 2020 |
| MIR19A    | 406979 |               | Microrna 19a                                             |                            | 151  | 0.512 | 0.808 |      | 0.03 |  | 1.00 | 3 | 0 | 2018 | 2019 |
| MIR21     | 406991 |               | Microrna 21                                              |                            | 726  | 0.363 | 0.846 |      | 0.03 |  | 1.00 | 3 | 1 | 2017 | 2018 |
| MIR210    | 406992 |               | Microrna 210                                             |                            | 277  | 0.46  | 0.846 |      | 0.03 |  | 1.00 | 3 | 0 | 2016 | 2018 |
| MIR30A    | 407029 |               | Microrna 30a                                             |                            | 218  | 0.478 | 0.808 |      | 0.03 |  | 1.00 | 3 | 0 | 2013 | 2018 |
| MAP3K5    | 4217   | Q99683        | Mitogen-activated protein kinase kinase kinase 5         | Kinase                     | 170  | 0.513 | 0.808 | 0.52 | 0.03 |  | 1.00 | 3 | 0 | 2017 | 2018 |
| MIF       | 4282   | P14174        | Macrophage migration inhibitory factor                   |                            | 455  | 0.412 | 0.885 | 0.01 | 0.03 |  | 1.00 | 3 | 0 | 2017 | 2019 |
| MMP8      | 4317   | P22894        | Matrix metallopeptidase 8                                | Enzyme                     | 213  | 0.488 | 0.808 | 0.00 | 0.03 |  | 1.00 | 3 | 1 | 2018 | 2019 |
| MMP10     | 4319   | P09238        | Matrix metallopeptidase 10                               | Enzyme                     | 123  | 0.553 | 0.808 | 0.00 | 0.03 |  | 1.00 | 3 | 0 | 2011 | 2019 |
| COX1      | 4512   | P00395        | Cytochrome c oxidase subunit I                           | Enzyme                     | 421  | 0.441 | 0.885 |      | 0.03 |  | 0.67 | 3 | 0 | 2010 | 2019 |
| NOS1      | 4842   | P29475        | Nitric oxide synthase 1                                  |                            | 521  | 0.408 | 0.885 | 1.00 | 0.03 |  | 1.00 | 3 | 3 | 2014 | 2018 |
| P2RY1     | 5028   | P47900        | Purinergic receptor P2Y1                                 | G-protein coupled receptor | 126  | 0.551 | 0.769 | 0.52 | 0.03 |  | 1.00 | 3 | 0 | 2017 | 2017 |
| ANGPTL4   | 51129  | Q9BY76        | Angiotensinogen like 4                                   | Signaling                  | 198  | 0.498 | 0.731 | 0.00 | 0.03 |  | 0.67 | 3 | 0 | 2016 | 2018 |
| TNFRSF12A | 51330  | Q9NP84        | TNF receptor superfamily member 12A                      |                            | 173  | 0.509 | 0.692 | 0.02 | 0.03 |  | 1.00 | 3 | 0 | 2007 | 2010 |
| RNLS      | 55328  | Q5VYX0        | Renalase, FAD dependent amine oxidase                    |                            | 32   | 0.678 | 0.423 | 0.00 | 0.03 |  | 1.00 | 3 | 2 | 2013 | 2018 |
| MEG3      | 55384  |               | Maternally expressed 3                                   |                            | 239  | 0.471 | 0.846 |      | 0.03 |  | 1.00 | 3 | 2 | 2017 | 2019 |
| SELENOS   | 55829  | Q9BQE4        | Selenoprotein S                                          |                            | 55   | 0.628 | 0.615 | 0.00 | 0.03 |  | 1.00 | 3 | 2 | 2007 | 2015 |
| PTX3      | 5806   | P26022        | Pentraxin 3                                              |                            | 296  | 0.457 | 0.808 | 0.00 | 0.03 |  | 1.00 | 3 | 0 | 2017 | 2018 |
| BCL2      | 596    | P10415        | BCL2 apoptosis regulator                                 | Signaling                  | 1456 | 0.291 | 0.885 | 0.56 | 0.03 |  | 1.00 | 3 | 0 | 2012 | 2019 |
| S100B     | 6285   | P04271        | S100 calcium binding protein B                           | Calcium-binding protein    | 599  | 0.383 | 0.923 | 0.04 | 0.03 |  | 1.00 | 3 | 1 | 2017 | 2018 |
| ACSM3     | 6296   | Q53FZ2        | Acyl-coa synthetase medium chain family member 3         | Enzyme                     | 69   | 0.623 | 0.615 | 0.00 | 0.03 |  | 1.00 | 3 | 0 | 2019 | 2019 |

|          |           |               |                                                                                  |                            |      |       |       |      |      |  |      |   |   |      |      |
|----------|-----------|---------------|----------------------------------------------------------------------------------|----------------------------|------|-------|-------|------|------|--|------|---|---|------|------|
| CCL11    | 6356      | P51671        | C-C motif chemokine ligand 11                                                    | Signaling                  | 250  | 0.473 | 0.885 | 0.01 | 0.03 |  | 1.00 | 3 | 0 | 2014 | 2017 |
| SELPLG   | 6404      | Q14242        | Selectin P ligand                                                                |                            | 113  | 0.564 | 0.692 | 0.18 | 0.03 |  | 1.00 | 3 | 1 | 2007 | 2016 |
| SLC1A2   | 6506      | P43004        | Solute carrier family 1 member 2                                                 | Transporter                | 208  | 0.511 | 0.731 | 0.71 | 0.03 |  | 1.00 | 3 | 0 | 2014 | 2019 |
| SLC25A1  | 6576      | P53007        | Solute carrier family 25 member 1                                                | Transporter                | 168  | 0.553 | 0.731 | 0.06 | 0.03 |  | 1.00 | 3 | 0 | 2017 | 2020 |
| BSG      | 682       | P35613        | Basigin (Ok blood group)                                                         |                            | 287  | 0.458 | 0.769 | 0.00 | 0.03 |  | 1.00 | 3 | 0 | 2017 | 2019 |
| CCR2     | 729230    | P41597        | C-C motif chemokine receptor 2                                                   |                            | 436  | 0.418 | 0.846 | 0.02 | 0.03 |  | 1.00 | 3 | 1 | 2014 | 2019 |
| XBP1     | 7494      | P17861        | X-box binding protein 1                                                          |                            | 234  | 0.477 | 0.846 | 0.03 | 0.03 |  | 1.00 | 3 | 0 | 2010 | 2019 |
| XRCC1    | 7515      | P18887        | X-ray repair cross complementing 1                                               |                            | 410  | 0.421 | 0.923 | 0.00 | 0.03 |  | 1.00 | 3 | 1 | 2006 | 2016 |
| CAD      | 790       | P27708        | Carbamoyl-phosphate synthetase 2, aspartate transcarbamylase, and dihydroorotase | Enzyme                     | 249  | 0.482 | 0.846 | 1.00 | 0.03 |  | 1.00 | 3 | 0 | 2013 | 2018 |
| SNHG12   | 85028     | Q9BXW3        | Small nucleolar RNA host gene 12                                                 |                            | 50   | 0.628 | 0.538 |      | 0.03 |  | 1.00 | 3 | 0 | 2018 | 2019 |
| TP63     | 8626      | Q9H3D4        | Tumor protein p63                                                                | Transcription factor       | 816  | 0.362 | 0.769 | 1.00 | 0.03 |  | 1.00 | 3 | 0 | 2017 | 2019 |
| SOCS1    | 8651      | O15524        | Suppressor of cytokine signaling 1                                               | Enzyme modulator           | 315  | 0.445 | 0.808 | 0.59 | 0.03 |  | 1.00 | 3 | 0 | 2016 | 2020 |
| KCNK17   | 89822     | Q96T54        | Potassium two pore domain channel subfamily K member 17                          | Ion channel                | 13   | 0.78  | 0.269 | 0.00 | 0.03 |  | 1.00 | 3 | 2 | 2010 | 2014 |
| NTN1     | 9423      | O95631        | Netrin 1                                                                         | Enzyme modulator           | 209  | 0.509 | 0.846 | 1.00 | 0.03 |  | 1.00 | 3 | 0 | 2017 | 2019 |
| ROCK2    | 9475      | O75116        | Rho associated coiled-coil containing protein kinase 2                           | Kinase                     | 154  | 0.529 | 0.808 | 1.00 | 0.03 |  | 1.00 | 3 | 2 | 2018 | 2019 |
| PTGES    | 9536      | O14684        | Prostaglandin E synthase                                                         |                            | 150  | 0.54  | 0.769 | 0.71 | 0.03 |  | 0.67 | 3 | 1 | 2009 | 2017 |
| CD40LG   | 959       | P29965        | CD40 ligand                                                                      | Signaling                  | 453  | 0.414 | 0.846 | 0.72 | 0.03 |  | 1.00 | 3 | 0 | 2012 | 2019 |
| CELSR1   | 9620      | Q9NYQ6        | Cadherin EGF LAG seven-pass G-type receptor 1                                    | G-protein coupled receptor | 30   | 0.7   | 0.5   |      | 0.03 |  | 1.00 | 3 | 2 | 2009 | 2015 |
| ARHGEF10 | 9639      | O15013        | Rho guanine nucleotide exchange factor 10                                        | Enzyme                     | 29   | 0.729 | 0.577 | 0.00 | 0.03 |  | 1.00 | 3 | 4 | 2011 | 2017 |
| MIR874   | 100126343 |               | Microrna 874                                                                     |                            | 53   | 0.628 | 0.577 |      | 0.02 |  | 1.00 | 2 | 0 | 2018 | 2019 |
| OCLN     | 100506658 | Q16625        | Occludin                                                                         |                            | 195  | 0.507 | 0.846 | 0.00 | 0.02 |  | 1.00 | 2 | 0 | 2017 | 2017 |
| MIR499B  | 100616134 |               | Microrna 499b                                                                    |                            | 15   | 0.76  | 0.269 |      | 0.02 |  | 1.00 | 2 | 1 | 2015 | 2019 |
| PPIF     | 10105     | P30405        | Peptidylprolyl isomerase F                                                       |                            | 78   | 0.593 | 0.692 | 0.00 | 0.02 |  | 1.00 | 2 | 0 | 2017 | 2020 |
| PGR-AS1  | 101054525 |               | PGR antisense RNA 1                                                              |                            | 172  | 0.514 | 0.808 |      | 0.02 |  | 1.00 | 2 | 0 | 2004 | 2017 |
| NAMPT    | 10135     | P43490        | Nicotinamide phosphoribosyltransferase                                           | Signaling                  | 199  | 0.502 | 0.808 | 0.98 | 0.02 |  | 1.00 | 2 | 0 | 2014 | 2016 |
| CBSL     | 102724560 | P0DN79:P35520 | Cystathionine β-synthase like                                                    |                            | 129  | 0.54  | 0.808 |      | 0.02 |  | 1.00 | 2 | 0 | 2006 | 2019 |
| AHSA1    | 10598     | O95433        | Activator of HSP90 atpase activity 1                                             |                            | 526  | 0.396 | 0.923 | 1.00 | 0.02 |  | 1.00 | 2 | 0 | 2018 | 2019 |
| SLC17A3  | 10786     | O00476        | Solute carrier family 17 member 3                                                | Transporter                | 21   | 0.769 | 0.385 | 0.00 | 0.02 |  | 1.00 | 2 | 1 | 2014 | 2016 |
| HPSE     | 10855     | Q9Y251        | Heparanase                                                                       | Enzyme                     | 393  | 0.425 | 0.808 | 0.00 | 0.02 |  | 0.50 | 2 | 0 | 2017 | 2017 |
| RUVBL2   | 10856     | Q9Y230        | Ruvb like AAA atpase 2                                                           |                            | 23   | 0.743 | 0.385 | 1.00 | 0.02 |  | 1.00 | 2 | 2 | 2009 | 2011 |
| CHI3L1   | 1116      | P36222        | Chitinase 3 like 1                                                               |                            | 420  | 0.419 | 0.885 | 0.00 | 0.02 |  | 1.00 | 2 | 0 | 2012 | 2016 |
| HSPA12B  | 116835    | Q96MM6        | Heat shock protein family A (Hsp70) member 12B                                   |                            | 16   | 0.751 | 0.269 | 0.00 | 0.02 |  | 1.00 | 2 | 0 | 2013 | 2018 |
| ADD1     | 118       | P35611        | Adducin 1                                                                        | Cellular structure         | 67   | 0.612 | 0.615 | 0.99 | 0.02 |  | 1.00 | 2 | 0 | 2011 | 2013 |
| RBM45    | 129831    | Q8IUH3        | RNA binding motif protein 45                                                     |                            | 557  | 0.383 | 0.846 | 0.00 | 0.02 |  | 1.00 | 2 | 0 | 2002 | 2016 |
| ADM      | 133       | P35318        | Adrenomedullin                                                                   | Signaling                  | 405  | 0.436 | 0.808 | 0.04 | 0.02 |  | 1.00 | 2 | 0 | 2012 | 2014 |
| CPOX     | 1371      | P36551        | Coproporphyrinogen oxidase                                                       | Enzyme                     | 246  | 0.488 | 0.846 | 0.17 | 0.02 |  | 1.00 | 2 | 0 | 2016 | 2019 |
| CRK      | 1398      | P46108        | CRK proto-oncogene, adaptor protein                                              |                            | 544  | 0.394 | 0.923 | 0.96 | 0.02 |  | 1.00 | 2 | 0 | 2018 | 2019 |
| MAPK14   | 1432      | Q16539        | Mitogen-activated protein kinase 14                                              | Kinase                     | 626  | 0.379 | 0.923 | 0.37 | 0.02 |  | 1.00 | 2 | 0 | 2018 | 2019 |
| CTLA4    | 1493      | P16410        | Cytotoxic T-lymphocyte associated protein 4                                      |                            | 722  | 0.369 | 0.923 | 0.94 | 0.02 |  | 1.00 | 2 | 0 | 2009 | 2019 |
| ADRA2B   | 151       | P18089        | Adrenoceptor α 2B                                                                | G-protein coupled receptor | 296  | 0.465 | 0.846 | 0.00 | 0.02 |  | 1.00 | 2 | 0 | 2013 | 2015 |
| ADRB2    | 154       | P07550        | Adrenoceptor β 2                                                                 | G-protein coupled receptor | 387  | 0.442 | 0.923 | 0.53 | 0.02 |  | 1.00 | 2 | 1 | 2007 | 2019 |
| CYP1A1   | 1543      | P04798        | Cytochrome P450 family 1 subfamily A member 1                                    | Enzyme                     | 379  | 0.436 | 0.846 | 0.00 | 0.02 |  | 1.00 | 2 | 2 | 2013 | 2016 |
| CYP2B6   | 1555      | P20813        | Cytochrome P450 family 2 subfamily B member 6                                    |                            | 388  | 0.428 | 0.846 | 0.00 | 0.02 |  | 1.00 | 2 | 0 | 2014 | 2016 |
| CYP2C8   | 1558      | P10632        | Cytochrome P450 family 2 subfamily C member 8                                    |                            | 73   | 0.615 | 0.615 | 0.00 | 0.02 |  | 1.00 | 2 | 1 | 2008 | 2015 |
| CYP3A4   | 1576      | P08684        | Cytochrome P450 family 3 subfamily A member 4                                    | Enzyme                     | 291  | 0.462 | 0.885 | 0.00 | 0.02 |  | 1.00 | 2 | 0 | 2018 | 2019 |
| CYP3A5   | 1577      | P20815        | Cytochrome P450 family 3 subfamily A member 5                                    | Enzyme                     | 179  | 0.511 | 0.846 | 0.00 | 0.02 |  | 1.00 | 2 | 1 | 2015 | 2019 |
| NQO1     | 1728      | P15559        | NAD(P)H quinone dehydrogenase 1                                                  |                            | 368  | 0.434 | 0.885 | 0.00 | 0.02 |  | 1.00 | 2 | 0 | 2010 | 2017 |
| AGTR2    | 186       | P50052        | Angiotensin II receptor type 2                                                   | G-protein coupled receptor | 229  | 0.496 | 0.808 | 0.01 | 0.02 |  | 1.00 | 2 | 0 | 2017 | 2019 |
| APLNR    | 187       | P35414        | Apelin receptor                                                                  | G-protein coupled receptor | 94   | 0.588 | 0.692 | 0.79 | 0.02 |  | 1.00 | 2 | 1 | 2017 | 2017 |
| ECE1     | 1889      | P42892        | Endothelin converting enzyme 1                                                   | Enzyme                     | 157  | 0.541 | 0.769 | 0.96 | 0.02 |  | 1.00 | 2 | 1 | 2013 | 2014 |
| EDNRA    | 1909      | P25101        | Endothelin receptor type A                                                       | G-protein coupled receptor | 427  | 0.426 | 0.885 | 0.99 | 0.02 |  | 1.00 | 2 | 2 | 2014 | 2015 |
| EGR1     | 1958      | P18146        | Early growth response 1                                                          | Nucleic acid binding       | 378  | 0.433 | 0.923 | 0.35 | 0.02 |  | 1.00 | 2 | 0 | 2015 | 2017 |
| AHSG     | 197       | P02765        | A 2-HS glycoprotein                                                              | Enzyme modulator           | 204  | 0.506 | 0.846 | 0.00 | 0.02 |  | 1.00 | 2 | 1 | 2009 | 2013 |
| MLKL     | 197259    | Q8NB16        | Mixed lineage kinase domain like pseudokinase                                    | Kinase                     | 93   | 0.57  | 0.731 | 0.00 | 0.02 |  | 1.00 | 2 | 0 | 2019 | 2019 |
| EPHA4    | 2043      | P54764        | EPH receptor A4                                                                  | Kinase                     | 118  | 0.566 | 0.846 | 1.00 | 0.02 |  | 1.00 | 2 | 0 | 2018 | 2019 |
| EPHB2    | 2048      | P29323        | EPH receptor B2                                                                  | Kinase                     | 649  | 0.374 | 0.846 | 1.00 | 0.02 |  | 1.00 | 2 | 0 | 2009 | 2019 |
| ESR2     | 2100      | Q92731        | Estrogen receptor 2                                                              | Nuclear receptor           | 528  | 0.4   | 0.923 | 0.00 | 0.02 |  | 1.00 | 2 | 3 | 2012 | 2016 |
| ALB      | 213       | P02768        | Albumin                                                                          | Transporter                | 1198 | 0.317 | 0.962 | 0.64 | 0.02 |  | 1.00 | 2 | 0 | 2018 | 2019 |
| EZH2     | 2146      | Q15910        | Enhancer of zeste 2 polycomb repressive complex 2 subunit                        | Epigenetic regulator       | 653  | 0.376 | 0.885 | 1.00 | 0.02 |  | 1.00 | 2 | 0 | 2013 | 2019 |
| F12      | 2161      | P00748        | Coagulation factor XII                                                           | Enzyme                     | 87   | 0.612 | 0.577 | 0.00 | 0.02 |  | 1.00 | 2 | 0 | 2004 | 2019 |
| FCGR2A   | 2212      | P12318        | Fc fragment of igg receptor iia                                                  | Cell adhesion              | 227  | 0.48  | 0.769 | 0.00 | 0.02 |  | 1.00 | 2 | 0 | 2009 | 2010 |
| FGFR4    | 2264      | P22455        | Fibroblast growth factor receptor 4                                              | Kinase                     | 220  | 0.49  | 0.769 | 0.00 | 0.02 |  | 1.00 | 2 | 1 | 2012 | 2014 |
| FGG      | 2266      | P02679        | Fibrinogen γ chain                                                               | Signaling                  | 70   | 0.633 | 0.615 | 0.05 | 0.02 |  | 1.00 | 2 | 0 | 2008 | 2008 |
| DKK1     | 22943     | O94907        | Dickkopf WNT signaling pathway inhibitor 1                                       |                            | 372  | 0.439 | 0.885 | 0.17 | 0.02 |  | 1.00 | 2 | 0 | 2017 | 2019 |
| RCOR1    | 23186     | Q9UKL0        | REST corepressor 1                                                               |                            | 36   | 0.678 | 0.577 | 1.00 | 0.02 |  | 1.00 | 2 | 0 | 2012 | 2018 |
| SNHG1    | 23642     |               | Small nucleolar RNA host gene 1                                                  |                            | 83   | 0.576 | 0.692 |      | 0.02 |  | 1.00 | 2 | 0 | 2018 | 2019 |
| ALOX12   | 239       | P18054        | Arachidonate 12-lipoxygenase, 12S type                                           | Enzyme                     | 119  | 0.558 | 0.692 | 0.00 | 0.02 |  | 1.00 | 2 | 1 | 2009 | 2011 |
| POU2F3   | 25833     | Q9UKI9        | POU class 2 homeobox 3                                                           |                            | 56   | 0.626 | 0.731 | 0.00 | 0.02 |  | 1.00 | 2 | 1 | 2002 | 2014 |
| RNF19A   | 25897     | Q9NV58        | Ring finger protein 19A, RBR E3 ubiquitin protein ligase                         | Enzyme                     | 523  | 0.397 | 0.923 | 0.03 | 0.02 |  | 1.00 | 2 | 0 | 2018 | 2019 |
| GCG      | 2641      | P01275        | Glucagon                                                                         |                            | 441  | 0.431 | 0.885 | 0.03 | 0.02 |  | 1.00 | 2 | 0 | 2018 | 2019 |
| GFAP     | 2670      | P14136        | Glial fibrillary acidic protein                                                  |                            | 447  | 0.421 | 0.885 | 0.00 | 0.02 |  | 1.00 | 2 | 0 | 2017 | 2020 |
| GJA4     | 2701      | P35212        | Gap junction protein α 4                                                         | Cell-cell junction         | 39   | 0.663 | 0.5   | 0.06 | 0.02 |  | 1.00 | 2 | 2 | 2011 | 2012 |

|                 |        |               |                                                                   |                            |      |       |       |      |      |  |      |   |   |      |      |
|-----------------|--------|---------------|-------------------------------------------------------------------|----------------------------|------|-------|-------|------|------|--|------|---|---|------|------|
| IL37            | 27178  | Q9NZH6        | Interleukin 37                                                    |                            | 280  | 0.459 | 0.846 | 0.00 | 0.02 |  | 1.00 | 2 | 0 | 2017 | 2019 |
| ANGPTL3         | 27329  | Q9Y5C1        | Angiopoietin like 3                                               | Signaling                  | 81   | 0.584 | 0.577 | 0.00 | 0.02 |  | 1.00 | 2 | 1 | 2011 | 2018 |
| GLP1R           | 2740   | P43220        | Glucagon like peptide 1 receptor                                  | G-protein coupled receptor | 288  | 0.471 | 0.846 | 0.29 | 0.02 |  | 1.00 | 2 | 0 | 2017 | 2019 |
| GPER1           | 2852   | Q99527        | G protein-coupled estrogen receptor 1                             | G-protein coupled receptor | 180  | 0.505 | 0.731 | 0.57 | 0.02 |  | 1.00 | 2 | 0 | 2018 | 2018 |
| GRIA2           | 2891   | P42262        | Glutamate ionotropic receptor AMPA type subunit 2                 | Ion channel                | 110  | 0.573 | 0.692 | 1.00 | 0.02 |  | 1.00 | 2 | 0 | 2005 | 2012 |
| GRIN1           | 2902   | Q05586        | Glutamate ionotropic receptor NMDA type subunit 1                 | Ion channel                | 150  | 0.561 | 0.692 | 0.98 | 0.02 |  | 1.00 | 2 | 0 | 2015 | 2017 |
| NR3C1           | 2908   | P04150        | Nuclear receptor subfamily 3 group C member 1                     | Nuclear receptor           | 590  | 0.393 | 0.885 | 0.97 | 0.02 |  | 1.00 | 2 | 0 | 2018 | 2019 |
| CXCL2           | 2920   | P19875        | C-X-C motif chemokine ligand 2                                    | Signaling                  | 186  | 0.513 | 0.885 | 0.00 | 0.02 |  | 1.00 | 2 | 0 | 2013 | 2019 |
| HABP2           | 3026   | Q14520        | Hyaluronan binding protein 2                                      | Enzyme                     | 88   | 0.593 | 0.615 | 0.00 | 0.02 |  | 1.00 | 2 | 0 | 2012 | 2017 |
| HDAC2           | 3066   | Q92769        | Histone deacetylase 2                                             | Epigenetic regulator       | 257  | 0.476 | 0.846 | 1.00 | 0.02 |  | 1.00 | 2 | 0 | 2020 | 2020 |
| CFH             | 3075   | P08603        | Complement factor H                                               |                            | 393  | 0.441 | 0.885 | 0.86 | 0.02 |  | 1.00 | 2 | 1 | 2008 | 2012 |
| HGF             | 3082   | P14210        | Hepatocyte growth factor                                          | Enzyme                     | 671  | 0.374 | 0.885 | 1.00 | 0.02 |  | 1.00 | 2 | 0 | 2018 | 2020 |
| HSPA1A          | 3303   | P0DMV8;P0DMV9 | Heat shock protein family A (Hsp70) member 1A                     |                            | 229  | 0.486 | 0.769 | 0.03 | 0.02 |  | 1.00 | 2 | 0 | 2007 | 2017 |
| HSPA1B          | 3304   | P0DMV8;P0DMV9 | Heat shock protein family A (Hsp70) member 1B                     |                            | 251  | 0.474 | 0.808 | 0.01 | 0.02 |  | 1.00 | 2 | 0 | 2007 | 2017 |
| HSPB1           | 3315   | P04792        | Heat shock protein family B (small) member 1                      |                            | 395  | 0.436 | 0.808 | 0.00 | 0.02 |  | 1.00 | 2 | 0 | 2017 | 2020 |
| HSPB2           | 3316   | Q16082        | Heat shock protein family B (small) member 2                      |                            | 290  | 0.457 | 0.769 | 0.00 | 0.02 |  | 1.00 | 2 | 0 | 2017 | 2020 |
| IFNG            | 3458   | P01579        | Interferon $\gamma$                                               |                            | 1519 | 0.288 | 0.962 | 0.47 | 0.02 |  | 1.00 | 2 | 0 | 2018 | 2018 |
| APOH            | 350    | P02749        | Apolipoprotein H                                                  |                            | 121  | 0.563 | 0.769 | 0.00 | 0.02 |  | 1.00 | 2 | 0 | 2009 | 2019 |
| IL9             | 3578   | P15248        | Interleukin 9                                                     |                            | 291  | 0.461 | 0.846 | 0.00 | 0.02 |  | 1.00 | 2 | 0 | 2017 | 2019 |
| IL15            | 3600   | P40933        | Interleukin 15                                                    |                            | 426  | 0.422 | 0.846 | 0.71 | 0.02 |  | 1.00 | 2 | 0 | 2017 | 2018 |
| IMPA2           | 3613   | O14732        | Inositol monophosphatase 2                                        | Enzyme                     | 26   | 0.695 | 0.385 | 0.00 | 0.02 |  | 1.00 | 2 | 2 | 2010 | 2016 |
| AQP9            | 366    | O43315        | Aquaporin 9                                                       | Ion channel                | 100  | 0.565 | 0.808 | 0.24 | 0.02 |  | 1.00 | 2 | 0 | 2017 | 2018 |
| IRF4            | 3662   | Q15306        | Interferon regulatory factor 4                                    | Transcription factor       | 203  | 0.491 | 0.769 | 0.86 | 0.02 |  | 1.00 | 2 | 0 | 2014 | 2018 |
| AR              | 367    | P10275        | Androgen receptor                                                 | Nuclear receptor           | 854  | 0.351 | 0.846 | 0.99 | 0.02 |  | 1.00 | 2 | 0 | 2008 | 2019 |
| JUN             | 3725   | P05412        | Jun proto-oncogene, AP-1 transcription factor subunit             | Transcription factor       | 344  | 0.442 | 0.885 | 0.06 | 0.02 |  | 1.00 | 2 | 0 | 2017 | 2018 |
| KCNJ13          | 3769   | O60928        | Potassium inwardly rectifying channel subfamily J member 13       | Ion channel                | 59   | 0.659 | 0.308 | 0.01 | 0.02 |  | 1.00 | 2 | 0 | 2016 | 2017 |
| KCNQ1           | 3784   | P51787        | Potassium voltage-gated channel subfamily Q member 1              | Ion channel                | 281  | 0.485 | 0.769 | 0.00 | 0.02 |  | 1.00 | 2 | 0 | 2015 | 2019 |
| ARG1            | 383    | P05089        | Arginase 1                                                        | Enzyme                     | 273  | 0.476 | 0.846 | 0.00 | 0.02 |  | 1.00 | 2 | 0 | 2016 | 2019 |
| FADS1           | 3992   | O60427        | Fatty acid desaturase 1                                           |                            | 125  | 0.582 | 0.769 | 0.37 | 0.02 |  | 1.00 | 2 | 2 | 2014 | 2015 |
| LLGL2           | 3993   | Q6P1M3        | LLGL scribble cell polarity complex component 2                   | Transporter                | 23   | 0.769 | 0.192 | 0.00 | 0.02 |  | 1.00 | 2 | 2 | 2009 | 2011 |
| LTA4H           | 4048   | P09960        | Leukotriene A4 hydrolase                                          |                            | 63   | 0.617 | 0.654 | 0.00 | 0.02 |  | 1.00 | 2 | 1 | 2008 | 2012 |
| MIR106B         | 406900 |               | Microrna 106b                                                     |                            | 143  | 0.523 | 0.808 |      | 0.02 |  | 1.00 | 2 | 0 | 2017 | 2018 |
| MIR107          | 406901 |               | Microrna 107                                                      |                            | 123  | 0.543 | 0.769 |      | 0.02 |  | 1.00 | 2 | 0 | 2014 | 2015 |
| MIR125A         | 406910 |               | Microrna 125a                                                     |                            | 225  | 0.48  | 0.769 |      | 0.02 |  | 1.00 | 2 | 1 | 2016 | 2017 |
| MIR132          | 406921 |               | Microrna 132                                                      |                            | 222  | 0.485 | 0.846 |      | 0.02 |  | 1.00 | 2 | 0 | 2018 | 2020 |
| MIR134          | 406924 |               | Microrna 134                                                      |                            | 126  | 0.542 | 0.769 |      | 0.02 |  | 1.00 | 2 | 0 | 2017 | 2018 |
| MIR150          | 406942 |               | Microrna 150                                                      |                            | 282  | 0.455 | 0.808 |      | 0.02 |  | 1.00 | 2 | 0 | 2016 | 2019 |
| MIR15A          | 406948 |               | Microrna 15a                                                      |                            | 221  | 0.482 | 0.808 |      | 0.02 |  | 1.00 | 2 | 0 | 2017 | 2017 |
| MIR181C         | 406957 |               | Microrna 181c                                                     |                            | 103  | 0.555 | 0.769 |      | 0.02 |  | 1.00 | 2 | 0 | 2019 | 2020 |
| MIR27B          | 407019 |               | Microrna 27b                                                      |                            | 141  | 0.529 | 0.769 |      | 0.02 |  | 1.00 | 2 | 0 | 2018 | 2019 |
| MIR29B1         | 407024 |               | Microrna 29b-1                                                    |                            | 212  | 0.485 | 0.846 |      | 0.02 |  | 1.00 | 2 | 0 | 2015 | 2018 |
| MIR29B2         | 407025 |               | Microrna 29b-2                                                    |                            | 214  | 0.484 | 0.885 |      | 0.02 |  | 1.00 | 2 | 0 | 2015 | 2018 |
| MIR17HG         | 407975 | Q75NE6        | Mir-17-92a-1 cluster host gene                                    |                            | 224  | 0.483 | 0.808 |      | 0.02 |  | 1.00 | 2 | 0 | 2019 | 2019 |
| TNFSF12-TNFSF13 | 407977 | O43508        | TNFSF12-TNFSF13 readthrough                                       |                            | 91   | 0.579 | 0.615 | 0.77 | 0.02 |  | 1.00 | 2 | 0 | 2008 | 2010 |
| ARSA            | 410    | P15289        | Arylsulfatase A                                                   | Enzyme                     | 376  | 0.448 | 0.923 | 0.00 | 0.02 |  | 1.00 | 2 | 1 | 2017 | 2018 |
| MIP             | 4284   | P30301        | Major intrinsic protein of lens fiber                             | Ion channel                | 181  | 0.507 | 0.846 | 0.03 | 0.02 |  | 1.00 | 2 | 0 | 1999 | 2019 |
| ACHE            | 43     | P22303        | Acetylcholinesterase (Cartwright blood group)                     | Enzyme                     | 418  | 0.445 | 0.885 | 1.00 | 0.02 |  | 1.00 | 2 | 0 | 2018 | 2020 |
| MMP7            | 4316   | P09237        | Matrix metalloproteinase 7                                        | Enzyme                     | 320  | 0.446 | 0.885 | 0.00 | 0.02 |  | 1.00 | 2 | 0 | 2015 | 2019 |
| MIR335          | 442904 |               | Microrna 335                                                      |                            | 141  | 0.521 | 0.808 |      | 0.02 |  | 1.00 | 2 | 0 | 2016 | 2019 |
| MTR             | 4548   | Q99707        | 5-methyltetrahydrofolate-homocysteine methyltransferase           |                            | 245  | 0.482 | 0.808 | 0.00 | 0.02 |  | 1.00 | 2 | 1 | 2001 | 2007 |
| MTRR            | 4552   | Q9UBK8        | 5-methyltetrahydrofolate-homocysteine methyltransferase reductase |                            | 207  | 0.502 | 0.808 | 0.00 | 0.02 |  | 1.00 | 2 | 0 | 2011 | 2019 |
| NUBP1           | 4682   | P53384        | Nucleotide binding protein 1                                      |                            | 25   | 0.743 | 0.231 | 0.00 | 0.02 |  | 1.00 | 2 | 0 | 2017 | 2017 |
| ATM             | 472    | Q13315        | ATM serine/threonine kinase                                       | Kinase                     | 684  | 0.374 | 0.885 | 0.00 | 0.02 |  | 1.00 | 2 | 0 | 2004 | 2017 |
| NGFR            | 4804   | P08138        | Nerve growth factor receptor                                      | Receptor                   | 256  | 0.477 | 0.846 | 0.10 | 0.02 |  | 1.00 | 2 | 2 | 2018 | 2018 |
| NOTCH1          | 4851   | P46531        | Notch receptor 1                                                  |                            | 693  | 0.369 | 0.885 | 1.00 | 0.02 |  | 1.00 | 2 | 0 | 2015 | 2019 |
| NPPA            | 4878   | P01160        | Natriuretic peptide A                                             |                            | 217  | 0.505 | 0.769 | 0.00 | 0.02 |  | 1.00 | 2 | 0 | 2001 | 2014 |
| NPR3            | 4883   | P17342        | Natriuretic peptide receptor 3                                    |                            | 83   | 0.633 | 0.615 | 0.00 | 0.02 |  | 1.00 | 2 | 1 | 2012 | 2013 |
| NTF3            | 4908   | P20783        | Neurotrophin 3                                                    | Signaling                  | 170  | 0.519 | 0.808 | 0.93 | 0.02 |  | 1.00 | 2 | 0 | 2012 | 2019 |
| DUOX2           | 50506  | Q9NRD8        | Dual oxidase 2                                                    | Enzyme                     | 150  | 0.533 | 0.769 | 0.00 | 0.02 |  | 1.00 | 2 | 0 | 2013 | 2019 |
| CKLF            | 51192  | Q9UBR5        | Chemokine like factor                                             |                            | 36   | 0.682 | 0.538 | 0.00 | 0.02 |  | 1.00 | 2 | 0 | 2019 | 2019 |
| CLEC1B          | 51266  | Q9P126        | C-type lectin domain family 1 member B                            |                            | 58   | 0.65  | 0.615 | 0.00 | 0.02 |  | 1.00 | 2 | 0 | 2018 | 2019 |
| PDE4A           | 5141   | P27815        | Phosphodiesterase 4A                                              |                            | 168  | 0.523 | 0.846 | 0.98 | 0.02 |  | 1.00 | 2 | 0 | 2018 | 2019 |
| SIRT6           | 51548  | Q8N6T7        | Sirtuin 6                                                         | Epigenetic regulator       | 195  | 0.496 | 0.846 | 0.04 | 0.02 |  | 1.00 | 2 | 0 | 2017 | 2019 |
| SERPINF1        | 5176   | P36955        | Serpin family F member 1                                          | Enzyme modulator           | 294  | 0.46  | 0.846 | 0.00 | 0.02 |  | 1.00 | 2 | 0 | 2017 | 2019 |
| PIN1            | 5300   | Q13526        | Peptidylprolyl cis/trans isomerase, NIMA-interacting 1            |                            | 212  | 0.488 | 0.769 | 0.74 | 0.02 |  | 1.00 | 2 | 0 | 2015 | 2018 |
| PLA2G1B         | 5319   | P04054        | Phospholipase A2 group IB                                         | Enzyme                     | 268  | 0.468 | 0.846 | 0.00 | 0.02 |  | 1.00 | 2 | 0 | 2003 | 2014 |
| PLA2G2A         | 5320   | P14555        | Phospholipase A2 group IIA                                        | Enzyme                     | 215  | 0.488 | 0.808 | 0.10 | 0.02 |  | 1.00 | 2 | 0 | 2003 | 2014 |
| PLAU            | 5328   | P00749        | Plasminogen activator, urokinase                                  | Enzyme                     | 439  | 0.425 | 0.923 | 0.00 | 0.02 |  | 1.00 | 2 | 0 | 2014 | 2019 |
| SERPINF2        | 5345   | P08697        | Serpin family F member 2                                          | Enzyme modulator           | 104  | 0.575 | 0.808 | 0.01 | 0.02 |  | 1.00 | 2 | 1 | 2017 | 2019 |
| DUOX1           | 53905  | Q9NRD9        | Dual oxidase 1                                                    | Enzyme                     | 97   | 0.57  | 0.692 | 0.00 | 0.02 |  | 1.00 | 2 | 0 | 2013 | 2019 |
| PPARD           | 5467   | Q03181        | Peroxisome proliferator activated receptor $\delta$               | Nuclear receptor           | 197  | 0.513 | 0.846 | 0.99 | 0.02 |  | 1.00 | 2 | 0 | 2013 | 2015 |
| PPID            | 5481   | Q08752        | Peptidylprolyl isomerase D                                        |                            | 72   | 0.603 | 0.692 | 0.00 | 0.02 |  | 1.00 | 2 | 0 | 2017 | 2020 |
| TUG1            | 55000  |               | Taurine up-regulated 1                                            |                            | 134  | 0.522 | 0.769 |      | 0.02 |  | 1.00 | 2 | 0 | 2017 | 2019 |

|         |           |        |                                                                                       |                            |      |       |       |      |      |  |      |   |   |      |      |
|---------|-----------|--------|---------------------------------------------------------------------------------------|----------------------------|------|-------|-------|------|------|--|------|---|---|------|------|
| MARCHF1 | 55016     | Q8TCQ1 | Membrane associated ring-CH-type finger 1                                             |                            | 126  | 0.54  | 0.808 | 0.01 | 0.02 |  | 1.00 | 2 | 0 | 2018 | 2018 |
| MAPK8   | 5599      | P45983 | Mitogen-activated protein kinase 8                                                    | Kinase                     | 520  | 0.397 | 0.885 | 1.00 | 0.02 |  | 1.00 | 2 | 0 | 2018 | 2019 |
| PROS1   | 5627      | P07225 | Protein S                                                                             |                            | 283  | 0.467 | 0.846 | 0.00 | 0.02 |  | 1.00 | 2 | 0 | 1994 | 2015 |
| PSMA6   | 5687      | P60900 | Proteasome 20S subunit $\alpha$ 6                                                     |                            | 43   | 0.653 | 0.654 | 0.99 | 0.02 |  | 0.50 | 2 | 1 | 2009 | 2013 |
| ACKR3   | 57007     | P25106 | Atypical chemokine receptor 3                                                         | G-protein coupled receptor | 400  | 0.428 | 0.885 | 0.39 | 0.02 |  | 1.00 | 2 | 0 | 2015 | 2018 |
| PTEN    | 5728      | P60484 | Phosphatase and tensin homolog                                                        | Enzyme                     | 1349 | 0.305 | 0.923 | 0.26 | 0.02 |  | 1.00 | 2 | 0 | 2018 | 2019 |
| PTGIS   | 5740      | Q16647 | Prostaglandin I2 synthase                                                             |                            | 70   | 0.617 | 0.654 | 0.00 | 0.02 |  | 1.00 | 2 | 1 | 2009 | 2011 |
| MIR494  | 574452    |        | Microma 494                                                                           |                            | 131  | 0.531 | 0.692 |      | 0.02 |  | 1.00 | 2 | 0 | 2019 | 2020 |
| NGB     | 58157     | Q9NPG2 | Neuroglobin                                                                           | Transporter                | 56   | 0.631 | 0.462 | 0.00 | 0.02 |  | 1.00 | 2 | 0 | 2008 | 2018 |
| CXCL16  | 58191     | Q9H2A7 | C-X-C motif chemokine ligand 16                                                       | Signaling                  | 178  | 0.502 | 0.769 | 0.00 | 0.02 |  | 1.00 | 2 | 0 | 2017 | 2019 |
| RAC1    | 5879      | P63000 | Rac family small gtpase 1                                                             | Enzyme modulator           | 415  | 0.429 | 0.962 | 0.76 | 0.02 |  | 1.00 | 2 | 0 | 2018 | 2019 |
| MOK     | 5891      | Q9UQ07 | MOK protein kinase                                                                    | Kinase                     | 251  | 0.476 | 0.769 | 0.00 | 0.02 |  | 1.00 | 2 | 1 | 2013 | 2016 |
| ACE2    | 59272     | Q9BYF1 | Angiotensin I converting enzyme 2                                                     | Enzyme                     | 253  | 0.477 | 0.769 | 1.00 | 0.02 |  | 1.00 | 2 | 3 | 2013 | 2014 |
| RBP4    | 5950      | P02753 | Retinol binding protein 4                                                             | Transporter                | 217  | 0.493 | 0.808 | 0.52 | 0.02 |  | 0.50 | 2 | 0 | 2018 | 2019 |
| BCL2A1  | 597       | Q16548 | BCL2 related protein A1                                                               | Signaling                  | 150  | 0.529 | 0.731 | 0.21 | 0.02 |  | 1.00 | 2 | 0 | 2019 | 2019 |
| RELA    | 5970      | Q04206 | RELA proto-oncogene, NF-kb subunit                                                    | Transcription factor       | 483  | 0.406 | 0.885 | 1.00 | 0.02 |  | 1.00 | 2 | 0 | 2015 | 2019 |
| HPSE2   | 60495     | Q8WWQ2 | Heparanase 2 (inactive)                                                               | Enzyme                     | 81   | 0.588 | 0.692 | 0.00 | 0.02 |  | 0.00 | 2 | 0 | 2005 | 2017 |
| GAS5    | 60674     |        | Growth arrest specific 5                                                              |                            | 184  | 0.497 | 0.808 |      | 0.02 |  | 0.50 | 2 | 1 | 2018 | 2018 |
| SGK1    | 6446      | O00141 | Serum/glucocorticoid regulated kinase 1                                               | Kinase                     | 188  | 0.506 | 0.769 | 0.00 | 0.02 |  | 1.00 | 2 | 2 | 2011 | 2019 |
| RTN4R   | 65078     | Q9BZR6 | Reticulon 4 receptor                                                                  |                            | 75   | 0.595 | 0.692 | 0.96 | 0.02 |  | 1.00 | 2 | 0 | 2017 | 2019 |
| SLC5A2  | 6524      | P31639 | Solute carrier family 5 member 2                                                      | Transporter                | 214  | 0.499 | 0.769 | 0.00 | 0.02 |  | 1.00 | 2 | 0 | 2017 | 2019 |
| SLC9A1  | 6548      | P19634 | Solute carrier family 9 member A1                                                     | Transporter                | 144  | 0.55  | 0.731 | 0.79 | 0.02 |  | 1.00 | 2 | 0 | 2018 | 2019 |
| SLC12A2 | 6558      | P55011 | Solute carrier family 12 member 2                                                     | Transporter                | 128  | 0.552 | 0.808 | 0.96 | 0.02 |  | 1.00 | 2 | 0 | 2019 | 2019 |
| SST     | 6750      | P61278 | Somatostatin                                                                          | Signaling                  | 535  | 0.399 | 0.885 | 0.34 | 0.02 |  | 1.00 | 2 | 0 | 2017 | 2018 |
| STC1    | 6781      | P52823 | Stanniocalcin 1                                                                       | Signaling                  | 137  | 0.532 | 0.731 | 0.20 | 0.02 |  | 0.50 | 2 | 0 | 2017 | 2020 |
| SULT1E1 | 6783      | P49888 | Sulfotransferase family 1E member 1                                                   |                            | 171  | 0.508 | 0.808 | 0.00 | 0.02 |  | 1.00 | 2 | 0 | 2012 | 2019 |
| SYK     | 6850      | P43405 | Spleen associated tyrosine kinase                                                     | Kinase                     | 229  | 0.475 | 0.808 | 1.00 | 0.02 |  | 1.00 | 2 | 0 | 2019 | 2019 |
| TBXAS1  | 6916      | P24557 | Thromboxane A synthase 1                                                              |                            | 77   | 0.619 | 0.615 | 0.00 | 0.02 |  | 1.00 | 2 | 2 | 2009 | 2018 |
| HNF1A   | 6927      | P20823 | HNF1 homeobox A                                                                       | Nucleic acid binding       | 292  | 0.478 | 0.846 | 0.96 | 0.02 |  | 1.00 | 2 | 3 | 2016 | 2017 |
| TGFA    | 7039      | P01135 | Transforming growth factor $\alpha$                                                   | Signaling                  | 376  | 0.432 | 0.885 | 0.72 | 0.02 |  | 1.00 | 2 | 0 | 2017 | 2020 |
| TSPO    | 706       | P30536 | Translocator protein                                                                  |                            | 341  | 0.444 | 0.885 | 0.00 | 0.02 |  | 1.00 | 2 | 0 | 2018 | 2019 |
| TIMP2   | 7077      | P16035 | TIMP metalloproteinase inhibitor 2                                                    | Enzyme modulator           | 404  | 0.425 | 0.846 | 0.79 | 0.02 |  | 1.00 | 2 | 0 | 2009 | 2018 |
| TLR2    | 7097      | O60603 | Toll like receptor 2                                                                  |                            | 749  | 0.361 | 0.923 | 0.00 | 0.02 |  | 1.00 | 2 | 1 | 2012 | 2019 |
| TNFSF4  | 7292      | P23510 | TNF superfamily member 4                                                              | Signaling                  | 129  | 0.54  | 0.808 | 0.05 | 0.02 |  | 1.00 | 2 | 1 | 2009 | 2019 |
| TXN     | 7295      | P10599 | Thioredoxin                                                                           |                            | 338  | 0.447 | 0.885 | 0.20 | 0.02 |  | 1.00 | 2 | 0 | 2017 | 2018 |
| VCAM1   | 7412      | P19320 | Vascular cell adhesion molecule 1                                                     |                            | 406  | 0.422 | 0.808 | 0.80 | 0.02 |  | 1.00 | 2 | 0 | 2007 | 2018 |
| TRPV1   | 7442      | Q8NER1 | Transient receptor potential cation channel subfamily V member 1                      | Ion channel                | 404  | 0.446 | 0.885 | 0.00 | 0.02 |  | 1.00 | 2 | 0 | 2017 | 2017 |
| CACNA1A | 773       | O00555 | Calcium voltage-gated channel subunit $\alpha$ 1 A                                    | Ion channel                | 320  | 0.489 | 0.769 | 1.00 | 0.02 |  | 1.00 | 2 | 0 | 2018 | 2018 |
| CXCR4   | 7852      | P61073 | C-X-C motif chemokine receptor 4                                                      | G-protein coupled receptor | 739  | 0.362 | 0.923 | 0.01 | 0.02 |  | 1.00 | 2 | 0 | 2018 | 2018 |
| AIMP2   | 7965      | Q13155 | Aminoacyl trna synthetase complex interacting multifunctional protein 2               |                            | 555  | 0.393 | 0.923 |      | 0.02 |  | 1.00 | 2 | 0 | 2018 | 2019 |
| NEIL1   | 79661     | Q96FI4 | Nei like DNA glycosylase 1                                                            |                            | 59   | 0.623 | 0.769 | 0.00 | 0.02 |  | 1.00 | 2 | 0 | 2015 | 2019 |
| NR4A3   | 8013      | Q92570 | Nuclear receptor subfamily 4 group A member 3                                         | Nuclear receptor           | 186  | 0.502 | 0.808 | 0.91 | 0.02 |  | 1.00 | 2 | 1 | 2002 | 2018 |
| PDGFD   | 80310     | Q9GZP0 | Platelet derived growth factor D                                                      | Signaling                  | 94   | 0.579 | 0.538 | 0.00 | 0.02 |  | 1.00 | 2 | 1 | 2008 | 2016 |
| COASY   | 80347     | Q13057 | Coenzyme A synthase                                                                   | Enzyme                     | 125  | 0.551 | 0.654 | 0.00 | 0.02 |  | 1.00 | 2 | 0 | 2017 | 2017 |
| COL18A1 | 80781     | P39060 | Collagen type XVIII $\alpha$ 1 chain                                                  |                            | 323  | 0.449 | 0.808 | 0.00 | 0.02 |  | 1.00 | 2 | 0 | 2017 | 2020 |
| PLA2G6  | 8398      | O60733 | Phospholipase A2 group VI                                                             | Enzyme modulator           | 350  | 0.476 | 0.846 | 0.00 | 0.02 |  | 1.00 | 2 | 0 | 2003 | 2014 |
| ULK1    | 8408      | O75385 | Unc-51 like autophagy activating kinase 1                                             | Kinase                     | 99   | 0.564 | 0.769 | 0.99 | 0.02 |  | 1.00 | 2 | 0 | 2016 | 2018 |
| TSLP    | 85480     | Q969D9 | Thymic stromal lymphopoietin                                                          |                            | 220  | 0.486 | 0.808 | 0.00 | 0.02 |  | 1.00 | 2 | 0 | 2018 | 2019 |
| BECN1   | 8678      | Q14457 | Beclin 1                                                                              | Enzyme modulator           | 373  | 0.432 | 0.846 | 0.94 | 0.02 |  | 1.00 | 2 | 0 | 2017 | 2017 |
| RIPK1   | 8737      | Q13546 | Receptor interacting serine/threonine kinase 1                                        | Kinase                     | 250  | 0.479 | 0.769 | 0.01 | 0.02 |  | 1.00 | 2 | 0 | 2019 | 2019 |
| TNFSF12 | 8742      | O43508 | TNF superfamily member 12                                                             |                            | 123  | 0.556 | 0.769 | 0.77 | 0.02 |  | 1.00 | 2 | 0 | 2008 | 2010 |
| HSPB3   | 8988      | Q12988 | Heat shock protein family B (small) member 3                                          |                            | 327  | 0.448 | 0.769 | 0.00 | 0.02 |  | 1.00 | 2 | 0 | 2017 | 2020 |
| MCU     | 90550     | Q8NE86 | Mitochondrial calcium uniporter                                                       | Ion channel                | 45   | 0.67  | 0.577 | 0.83 | 0.02 |  | 1.00 | 2 | 0 | 2018 | 2018 |
| TIMD4   | 91937     | Q96H15 | T cell immunoglobulin and mucin domain containing 4                                   |                            | 49   | 0.644 | 0.654 | 0.00 | 0.02 |  | 1.00 | 2 | 1 | 2018 | 2018 |
| SLC33A1 | 9197      | O00400 | Solute carrier family 33 member 1                                                     | Transporter                | 170  | 0.529 | 0.769 | 0.00 | 0.02 |  | 1.00 | 2 | 0 | 2004 | 2017 |
| CD14    | 929       | P08571 | CD14 molecule                                                                         |                            | 551  | 0.392 | 0.885 | 0.00 | 0.02 |  | 1.00 | 2 | 1 | 2006 | 2017 |
| COX5A   | 9377      | P20674 | Cytochrome c oxidase subunit 5A                                                       | Enzyme                     | 171  | 0.515 | 0.846 | 0.49 | 0.02 |  | 1.00 | 2 | 0 | 2016 | 2019 |
| GRAP2   | 9402      | O75791 | GRB2 related adaptor protein 2                                                        |                            | 538  | 0.394 | 0.923 | 0.00 | 0.02 |  | 1.00 | 2 | 0 | 2018 | 2019 |
| ABCG2   | 9429      | Q9UNQ0 | ATP binding cassette subfamily G member 2 (Junior blood group)                        | Transporter                | 420  | 0.419 | 0.885 | 0.00 | 0.02 |  | 1.00 | 2 | 1 | 2009 | 2018 |
| GSTO1   | 9446      | P78417 | Glutathione S-transferase omega 1                                                     |                            | 136  | 0.541 | 0.769 | 0.00 | 0.02 |  | 0.50 | 2 | 0 | 2009 | 2019 |
| AIM2    | 9447      | O14862 | Absent in melanoma 2                                                                  |                            | 167  | 0.521 | 0.769 | 0.00 | 0.02 |  | 1.00 | 2 | 0 | 2019 | 2020 |
| EIF2AK3 | 9451      | Q9NZJ5 | Eukaryotic translation initiation factor 2 $\alpha$ kinase 3                          | Kinase                     | 231  | 0.501 | 0.808 | 0.00 | 0.02 |  | 1.00 | 2 | 0 | 2017 | 2020 |
| CARTPT  | 9607      | Q16568 | CART prepropeptide                                                                    |                            | 115  | 0.576 | 0.692 | 0.09 | 0.02 |  | 1.00 | 2 | 0 | 2009 | 2018 |
| ABCG1   | 9619      | P45844 | ATP binding cassette subfamily G member 1                                             | Transporter                | 118  | 0.56  | 0.692 | 0.11 | 0.02 |  | 1.00 | 2 | 2 | 2015 | 2019 |
| CD69    | 969       | Q07108 | CD69 molecule                                                                         |                            | 206  | 0.488 | 0.923 | 0.03 | 0.02 |  | 1.00 | 2 | 0 | 2018 | 2019 |
| SEMA3E  | 9723      | O15041 | Semaphorin 3E                                                                         | Signaling                  | 184  | 0.515 | 0.769 | 0.00 | 0.02 |  | 1.00 | 2 | 0 | 2018 | 2019 |
| MAFB    | 9935      | Q9Y5Q3 | MAF bzip transcription factor B                                                       | Transcription factor       | 135  | 0.565 | 0.731 | 0.90 | 0.02 |  | 1.00 | 2 | 0 | 2015 | 2017 |
| CDC42   | 998       | P60953 | Cell division cycle 42                                                                | Enzyme modulator           | 327  | 0.458 | 0.846 | 0.79 | 0.02 |  | 1.00 | 2 | 0 | 2013 | 2019 |
| ZGLP1   | 100125288 | P0C6A0 | Zinc finger GATA like protein 1                                                       |                            | 186  | 0.512 | 0.808 | 0.39 | 0.01 |  | 1.00 | 1 | 0 | 2019 | 2019 |
| MIR298  | 100126296 |        | Microma 298                                                                           |                            | 20   | 0.729 | 0.346 |      | 0.01 |  | 1.00 | 1 | 0 | 2018 | 2018 |
| MIR922  | 100126321 |        | Microma 922                                                                           |                            | 8    | 0.821 | 0.231 |      | 0.01 |  | 1.00 | 1 | 0 | 2019 | 2019 |
| KIR2DS2 | 100132285 | P43631 | Killer cell immunoglobulin like receptor, two Ig domains and short cytoplasmic tail 2 |                            | 69   | 0.599 | 0.615 |      | 0.01 |  | 1.00 | 1 | 0 | 2019 | 2019 |
| DEFB4B  | 100289462 | O15263 | Defensin $\beta$ 4B                                                                   |                            | 166  | 0.51  | 0.769 | 0.07 | 0.01 |  | 1.00 | 1 | 0 | 2012 | 2012 |

|              |           |        |                                                                  |                            |      |       |       |      |      |  |      |   |   |      |      |
|--------------|-----------|--------|------------------------------------------------------------------|----------------------------|------|-------|-------|------|------|--|------|---|---|------|------|
| MIR1306      | 100302197 |        | Microrna 1306                                                    |                            | 17   | 0.736 | 0.308 |      | 0.01 |  | 1.00 | 1 | 0 | 2019 | 2019 |
| MIR1203      | 100302211 |        | Microrna 1203                                                    |                            | 6    | 0.89  | 0.231 |      | 0.01 |  | 1.00 | 1 | 0 | 2017 | 2017 |
| MIR664A      | 100302234 |        | Microrna 664a                                                    |                            | 43   | 0.644 | 0.538 |      | 0.01 |  | 0.00 | 1 | 0 | 2019 | 2019 |
| HOTTIP       | 100316868 |        | HOXA distal transcript antisense RNA                             |                            | 90   | 0.575 | 0.654 |      | 0.01 |  | 1.00 | 1 | 0 | 2018 | 2018 |
| MIR4437      | 100616213 |        | Microrna 4437                                                    |                            | 1    | 1     | 0.077 |      | 0.01 |  | 1.00 | 1 | 0 | 2018 | 2018 |
| MIR4669      | 100616236 |        | Microrna 4669                                                    |                            | 3    | 0.89  | 0.154 |      | 0.01 |  | 1.00 | 1 | 1 | 2019 | 2019 |
| MIR4656      | 100616465 |        | Microrna 4656                                                    |                            | 8    | 0.821 | 0.231 |      | 0.01 |  | 1.00 | 1 | 0 | 2018 | 2018 |
| NR1H3        | 10062     | Q13133 | Nuclear receptor subfamily 1 group H member 3                    | Nuclear receptor           | 102  | 0.566 | 0.692 | 0.90 | 0.01 |  | 1.00 | 1 | 1 | 2015 | 2015 |
| EDIL3        | 10085     | O43854 | EGF like repeats and discoidin domains 3                         | Enzyme                     | 104  | 0.564 | 0.769 | 0.00 | 0.01 |  | 1.00 | 1 | 0 | 2008 | 2008 |
| PTCSC3       | 100886964 |        | Papillary thyroid carcinoma susceptibility candidate 3           |                            | 23   | 0.722 | 0.385 |      | 0.01 |  | 1.00 | 1 | 0 | 2016 | 2016 |
| CDH13        | 1012      | P55290 | Cadherin 13                                                      |                            | 205  | 0.501 | 0.846 | 0.00 | 0.01 |  | 1.00 | 1 | 0 | 2017 | 2017 |
| EBI3         | 10148     | Q14213 | Epstein-Barr virus induced 3                                     | Signaling                  | 233  | 0.474 | 0.808 | 0.11 | 0.01 |  | 1.00 | 1 | 0 | 2019 | 2019 |
| EMSLR        | 101927746 |        | E2F1 mrna stabilizing lncrna                                     |                            | 30   | 0.695 | 0.5   |      | 0.01 |  | 1.00 | 1 | 0 | 2017 | 2017 |
| LOC101929707 | 101929707 |        | Uncharacterized LOC101929707                                     |                            | 1    | 1     | 0.077 |      | 0.01 |  | 1.00 | 1 | 0 | 2018 | 2018 |
| CDKN3        | 1033      | Q16667 | Cyclin dependent kinase inhibitor 3                              |                            | 150  | 0.514 | 0.769 | 0.00 | 0.01 |  | 1.00 | 1 | 0 | 2017 | 2017 |
| IRF9         | 10379     | Q00978 | Interferon regulatory factor 9                                   | Transcription factor       | 60   | 0.61  | 0.577 | 0.61 | 0.01 |  | 1.00 | 1 | 0 | 2014 | 2014 |
| ERICD        | 104355217 |        | E2F1-regulated inhibitor of cell death                           |                            | 36   | 0.691 | 0.654 |      | 0.01 |  | 1.00 | 1 | 0 | 2017 | 2017 |
| ATG7         | 10533     | O95352 | Autophagy related 7                                              | Enzyme                     | 179  | 0.505 | 0.769 | 0.00 | 0.01 |  | 1.00 | 1 | 0 | 2017 | 2017 |
| AGR2         | 10551     | O95994 | Anterior gradient 2, protein disulphide isomerase family member  | Enzyme                     | 108  | 0.556 | 0.692 | 0.00 | 0.01 |  | 1.00 | 1 | 0 | 2017 | 2017 |
| GNLY         | 10578     | P22749 | Granulysin                                                       |                            | 88   | 0.584 | 0.692 | 0.00 | 0.01 |  | 1.00 | 1 | 0 | 2012 | 2012 |
| SORBS1       | 10580     | Q9BX66 | Sorbin and SH3 domain containing 1                               |                            | 124  | 0.554 | 0.769 | 0.00 | 0.01 |  | 1.00 | 1 | 1 | 2008 | 2008 |
| CAMKK2       | 10645     | Q96RR4 | Calcium/calmodulin dependent protein kinase kinase 2             | Kinase                     | 62   | 0.617 | 0.654 | 0.09 | 0.01 |  | 1.00 | 1 | 1 | 2012 | 2012 |
| CXCR6        | 10663     | O00574 | C-X-C motif chemokine receptor 6                                 | G-protein coupled receptor | 325  | 0.448 | 0.885 | 0.00 | 0.01 |  | 1.00 | 1 | 0 | 2015 | 2015 |
| MASP2        | 10747     | O00187 | Mannan binding lectin serine peptidase 2                         | Enzyme                     | 86   | 0.582 | 0.692 | 0.00 | 0.01 |  | 1.00 | 1 | 1 | 2018 | 2018 |
| TRAF3IP2     | 10758     | O43734 | TRAF3 interacting protein 2                                      |                            | 103  | 0.585 | 0.692 | 0.00 | 0.01 |  | 1.00 | 1 | 0 | 2018 | 2018 |
| NES          | 10763     | P48681 | Nestin                                                           |                            | 302  | 0.45  | 0.808 | 0.00 | 0.01 |  | 1.00 | 1 | 0 | 2017 | 2017 |
| PLK2         | 10769     | Q9NYY3 | Polo like kinase 2                                               | Kinase                     | 97   | 0.575 | 0.808 | 1.00 | 0.01 |  | 1.00 | 1 | 0 | 2018 | 2018 |
| ALDH1L1      | 10840     | O75891 | Aldehyde dehydrogenase 1 family member L1                        | Enzyme                     | 49   | 0.663 | 0.615 | 0.00 | 0.01 |  | 1.00 | 1 | 1 | 2014 | 2014 |
| LILRB1       | 10859     | Q8NHL6 | Leukocyte immunoglobulin like receptor B1                        | Receptor                   | 168  | 0.51  | 0.769 | 0.00 | 0.01 |  | 1.00 | 1 | 0 | 2018 | 2018 |
| RNPS1        | 10921     | Q15287 | RNA binding protein with serine rich domain 1                    | Nucleic acid binding       | 23   | 0.722 | 0.5   | 0.98 | 0.01 |  | 1.00 | 1 | 0 | 2020 | 2020 |
| FASTK        | 10922     | Q14296 | Fas activated serine/threonine kinase                            | Kinase                     | 65   | 0.617 | 0.615 | 0.00 | 0.01 |  | 1.00 | 1 | 0 | 2017 | 2017 |
| PDIA5        | 10954     | Q14554 | Protein disulfide isomerase family A member 5                    |                            | 15   | 0.805 | 0.346 | 0.00 | 0.01 |  | 1.00 | 1 | 1 | 2017 | 2017 |
| STIP1        | 10963     | P31948 | Stress induced phosphoprotein 1                                  |                            | 85   | 0.578 | 0.692 | 1.00 | 0.01 |  | 1.00 | 1 | 0 | 2017 | 2017 |
| COPS5        | 10987     | Q92905 | COP9 signalosome subunit 5                                       | Enzyme                     | 101  | 0.566 | 0.769 | 1.00 | 0.01 |  | 1.00 | 1 | 0 | 2017 | 2017 |
| RIPK3        | 11035     | Q9Y572 | Receptor interacting serine/threonine kinase 3                   | Kinase                     | 196  | 0.497 | 0.885 | 0.00 | 0.01 |  | 1.00 | 1 | 0 | 2019 | 2019 |
| LOC110673971 | 110673971 |        | CYP11B2 promoter                                                 |                            | 5    | 0.89  | 0.269 |      | 0.01 |  | 1.00 | 1 | 0 | 2010 | 2010 |
| DUSP14       | 11072     | O95147 | Dual specificity phosphatase 14                                  |                            | 13   | 0.78  | 0.308 | 0.12 | 0.01 |  | 1.00 | 1 | 0 | 2019 | 2019 |
| CAPN10       | 11132     | Q9HC96 | Calpain 10                                                       | Enzyme                     | 58   | 0.621 | 0.577 | 0.00 | 0.01 |  | 1.00 | 1 | 0 | 2017 | 2017 |
| CHIT1        | 1118      | Q13231 | Chitinase 1                                                      |                            | 142  | 0.525 | 0.692 | 0.00 | 0.01 |  | 1.00 | 1 | 0 | 2007 | 2007 |
| TREX1        | 11277     | Q9NSU2 | Three prime repair exonuclease 1                                 |                            | 241  | 0.517 | 0.808 | 0.58 | 0.01 |  | 1.00 | 1 | 0 | 2018 | 2018 |
| PARK7        | 11315     | Q99497 | Parkinsonism associated deglycase                                | Enzyme                     | 161  | 0.535 | 0.808 | 0.75 | 0.01 |  | 1.00 | 1 | 0 | 2017 | 2017 |
| VSIG4        | 11326     | Q9Y279 | V-set and immunoglobulin domain containing 4                     |                            | 51   | 0.628 | 0.615 | 0.00 | 0.01 |  | 1.00 | 1 | 0 | 2020 | 2020 |
| ACOT7        | 11332     | O00154 | Acyl-coa thioesterase 7                                          | Enzyme                     | 146  | 0.531 | 0.769 | 0.76 | 0.01 |  | 1.00 | 1 | 0 | 2010 | 2010 |
| MGLL         | 11343     | Q99685 | Monoglyceride lipase                                             | Enzyme                     | 125  | 0.564 | 0.731 | 0.02 | 0.01 |  | 1.00 | 1 | 0 | 2018 | 2018 |
| CHRNA4       | 1137      | P43681 | Cholinergic receptor nicotinic $\alpha$ 4 subunit                | Ion channel                | 248  | 0.492 | 0.808 | 0.00 | 0.01 |  | 1.00 | 1 | 0 | 2018 | 2018 |
| TRIM9        | 114088    | Q9C026 | Tripartite motif containing 9                                    |                            | 24   | 0.705 | 0.5   | 1.00 | 0.01 |  | 1.00 | 1 | 0 | 2019 | 2019 |
| CIRBP        | 1153      | Q14011 | Cold inducible RNA binding protein                               | Nucleic acid binding       | 72   | 0.592 | 0.731 | 0.34 | 0.01 |  | 1.00 | 1 | 0 | 2014 | 2014 |
| H3P7         | 115482683 |        | H3 histone pseudogene 7                                          |                            | 28   | 0.686 | 0.538 |      | 0.01 |  | 1.00 | 1 | 0 | 2017 | 2017 |
| ADCYAP1      | 116       | P18509 | Adenylate cyclase activating polypeptide 1                       | Signaling                  | 220  | 0.51  | 0.846 | 0.52 | 0.01 |  | 1.00 | 1 | 0 | 2018 | 2018 |
| LRG1         | 116844    | P02750 | Leucine rich $\alpha$ -2-glycoprotein 1                          |                            | 109  | 0.564 | 0.731 | 0.10 | 0.01 |  | 1.00 | 1 | 0 | 2019 | 2019 |
| CYP2R1       | 120227    | Q6VVX0 | Cytochrome P450 family 2 subfamily R member 1                    |                            | 139  | 0.563 | 0.731 | 0.00 | 0.01 |  | 1.00 | 1 | 1 | 2018 | 2018 |
| ACOT4        | 122970    | Q8N9L9 | Acyl-coa thioesterase 4                                          |                            | 1    | 1     | 0.077 | 0.00 | 0.01 |  | 1.00 | 1 | 1 | 2015 | 2015 |
| CCR5         | 1234      | P51681 | C-C motif chemokine receptor 5 (gene/pseudogene)                 | G-protein coupled receptor | 508  | 0.398 | 0.885 | 0.00 | 0.01 |  | 1.00 | 1 | 0 | 2009 | 2009 |
| FOPNL        | 123811    | Q96NB1 | FGFR1OP N-terminal like                                          |                            | 15   | 0.76  | 0.462 | 0.00 | 0.01 |  | 1.00 | 1 | 0 | 2019 | 2019 |
| TAF8         | 129685    | Q7Z7C8 | TATA-box binding protein associated factor 8                     |                            | 18   | 0.751 | 0.423 | 0.00 | 0.01 |  | 1.00 | 1 | 0 | 2018 | 2018 |
| UBR3         | 130507    | Q6ZT12 | Ubiquitin protein ligase E3 component n-recognin 3               |                            | 3    | 0.89  | 0.115 | 1.00 | 0.01 |  | 1.00 | 1 | 1 | 2010 | 2010 |
| COMT         | 1312      | P21964 | Catechol-O-methyltransferase                                     | Enzyme                     | 622  | 0.4   | 0.923 | 0.00 | 0.01 |  | 1.00 | 1 | 0 | 2014 | 2014 |
| CRHR1        | 1394      | P34998 | Corticotropin releasing hormone receptor 1                       |                            | 183  | 0.517 | 0.769 | 0.00 | 0.01 |  | 1.00 | 1 | 0 | 2020 | 2020 |
| CRMP1        | 1400      | Q14194 | Collapsin response mediator protein 1                            | Enzyme                     | 148  | 0.525 | 0.808 | 0.99 | 0.01 |  | 1.00 | 1 | 0 | 2017 | 2017 |
| DEFB104A     | 140596    | Q8WTQ1 | Defensin $\beta$ 104A                                            |                            | 43   | 0.638 | 0.692 | 0.09 | 0.01 |  | 1.00 | 1 | 0 | 2012 | 2012 |
| TRPM6        | 140803    | Q9BX84 | Transient receptor potential cation channel subfamily M member 6 | Kinase                     | 48   | 0.656 | 0.538 | 0.00 | 0.01 |  | 1.00 | 1 | 1 | 2019 | 2019 |
| SRXN1        | 140809    | Q9BYN0 | Sulfiredoxin 1                                                   |                            | 18   | 0.751 | 0.385 | 0.07 | 0.01 |  | 1.00 | 1 | 0 | 2017 | 2017 |
| CRYZ         | 1429      | Q08257 | Crystallin $\zeta$                                               |                            | 145  | 0.524 | 0.731 | 0.00 | 0.01 |  | 1.00 | 1 | 0 | 2017 | 2017 |
| CSF2         | 1437      | P04141 | Colony stimulating factor 2                                      | Signaling                  | 1028 | 0.33  | 0.962 | 0.83 | 0.01 |  | 1.00 | 1 | 0 | 2018 | 2018 |
| TTC7B        | 145567    | Q86TV6 | Tetratricopeptide repeat domain 7B                               |                            | 7    | 0.861 | 0.154 | 1.00 | 0.01 |  | 1.00 | 1 | 0 | 2012 | 2012 |
| ADRA1A       | 148       | P35348 | Adrenoceptor $\alpha$ 1A                                         | G-protein coupled receptor | 294  | 0.462 | 0.846 | 0.00 | 0.01 |  | 1.00 | 1 | 0 | 2015 | 2015 |
| CILP2        | 148113    | Q8IUL8 | Cartilage intermediate layer protein 2                           |                            | 15   | 0.76  | 0.346 | 0.00 | 0.01 |  | 1.00 | 1 | 0 | 2011 | 2011 |
| NKX2-5       | 1482      | P52952 | NK2 homeobox 5                                                   | Transcription factor       | 165  | 0.533 | 0.692 | 0.95 | 0.01 |  | 1.00 | 1 | 0 | 2019 | 2019 |
| HJV          | 148738    | Q6ZVN8 | Hemojuvelin BMP co-receptor                                      |                            | 71   | 0.621 | 0.654 | 0.00 | 0.01 |  | 1.00 | 1 | 0 | 2019 | 2019 |
| CTNNB1       | 1499      | P35222 | Catenin $\beta$ 1                                                |                            | 1368 | 0.303 | 0.885 | 1.00 | 0.01 |  | 1.00 | 1 | 0 | 2019 | 2019 |
| ADRA2A       | 150       | P08913 | Adrenoceptor $\alpha$ 2A                                         | G-protein coupled receptor | 102  | 0.578 | 0.615 | 0.00 | 0.01 |  | 0.00 | 1 | 0 | 2013 | 2013 |
| ARL6IP6      | 151188    | Q8N6S5 | ADP ribosylation factor like gtpase 6 interacting protein 6      |                            | 36   | 0.686 | 0.615 | 0.02 | 0.01 |  | 1.00 | 1 | 0 | 2015 | 2015 |

|            |        |         |                                                                 |                            |      |       |       |      |      |  |      |   |   |      |      |
|------------|--------|---------|-----------------------------------------------------------------|----------------------------|------|-------|-------|------|------|--|------|---|---|------|------|
| RMDN2      | 151393 | Q96LZ7  | Regulator of microtubule dynamics 2                             |                            | 137  | 0.531 | 0.769 | 0.00 | 0.01 |  | 1.00 | 1 | 0 | 2017 | 2017 |
| ADRA2C     | 152    | P18825  | Adrenoceptor $\alpha$ 2C                                        | G-protein coupled receptor | 40   | 0.682 | 0.346 | 0.50 | 0.01 |  | 0.00 | 1 | 0 | 2013 | 2013 |
| ADRB1      | 153    | P08588  | Adrenoceptor $\beta$ 1                                          | G-protein coupled receptor | 130  | 0.555 | 0.769 | 0.00 | 0.01 |  | 1.00 | 1 | 1 | 2015 | 2015 |
| C5orf38    | 153571 | Q86SI9  | Chromosome 5 open reading frame 38                              |                            | 1    | 1     | 0.077 | 0.00 | 0.01 |  | 1.00 | 1 | 0 | 2019 | 2019 |
| CYP2B7P    | 1556   |         | Cytochrome P450 family 2 subfamily B member 7, pseudogene       |                            | 16   | 0.76  | 0.385 |      | 0.01 |  | 1.00 | 1 | 0 | 2014 | 2014 |
| CYP2D6     | 1565   | P10635  | Cytochrome P450 family 2 subfamily D member 6                   |                            | 432  | 0.437 | 0.885 | 0.00 | 0.01 |  | 1.00 | 1 | 0 | 2018 | 2018 |
| CYP2E1     | 1571   | P05181  | Cytochrome P450 family 2 subfamily E member 1                   |                            | 306  | 0.459 | 0.885 | 0.00 | 0.01 |  | 1.00 | 1 | 0 | 2017 | 2017 |
| CYP24A1    | 1591   | Q07973  | Cytochrome P450 family 24 subfamily A member 1                  | Enzyme                     | 171  | 0.518 | 0.692 | 0.00 | 0.01 |  | 1.00 | 1 | 1 | 2018 | 2018 |
| DECR1      | 1666   | Q16698  | 2,4-dienoyl-coa reductase 1                                     | Enzyme                     | 399  | 0.426 | 0.885 | 0.00 | 0.01 |  | 1.00 | 1 | 0 | 2017 | 2017 |
| DEFB1      | 1672   | P60022  | Defensin $\beta$ 1                                              |                            | 177  | 0.509 | 0.808 | 0.41 | 0.01 |  | 1.00 | 1 | 0 | 2012 | 2012 |
| DEFB4A     | 1673   | O15263  | Defensin $\beta$ 4A                                             |                            | 177  | 0.507 | 0.769 | 0.00 | 0.01 |  | 1.00 | 1 | 0 | 2012 | 2012 |
| DLD        | 1738   | P09622  | Dihydrolipoamide dehydrogenase                                  | Enzyme                     | 190  | 0.517 | 0.769 | 0.01 | 0.01 |  | 1.00 | 1 | 0 | 2016 | 2016 |
| DLG2       | 1740   | Q15700  | Discs large MAGUK scaffold protein 2                            | Receptor                   | 44   | 0.67  | 0.577 | 0.71 | 0.01 |  | 1.00 | 1 | 0 | 2019 | 2019 |
| DVL1       | 1855   | O14640  | Dishevelled segment polarity protein 1                          | Signaling                  | 181  | 0.531 | 0.769 | 0.00 | 0.01 |  | 1.00 | 1 | 0 | 2001 | 2001 |
| EDN2       | 1907   | P20800  | Endothelin 2                                                    | Signaling                  | 32   | 0.716 | 0.462 | 0.06 | 0.01 |  | 1.00 | 1 | 0 | 2018 | 2018 |
| EDN3       | 1908   | P14138  | Endothelin 3                                                    | Signaling                  | 107  | 0.608 | 0.577 | 0.02 | 0.01 |  | 1.00 | 1 | 0 | 2018 | 2018 |
| EEF1A1     | 1915   | P68104  | Eukaryotic translation elongation factor 1 $\alpha$ 1           | Enzyme                     | 88   | 0.584 | 0.654 | 0.98 | 0.01 |  | 1.00 | 1 | 0 | 2018 | 2018 |
| EFNB2      | 1948   | P52799  | Ephrin B2                                                       | Signaling                  | 109  | 0.561 | 0.692 | 0.99 | 0.01 |  | 1.00 | 1 | 0 | 2019 | 2019 |
| CELSR2     | 1952   | Q9HCU4  | Cadherin EGF LAG seven-pass G-type receptor 2                   | G-protein coupled receptor | 63   | 0.656 | 0.577 | 1.00 | 0.01 |  | 1.00 | 1 | 1 | 2015 | 2015 |
| EGR2       | 1959   | P11161  | Early growth response 2                                         | Nucleic acid binding       | 133  | 0.547 | 0.769 | 0.50 | 0.01 |  | 1.00 | 1 | 0 | 2018 | 2018 |
| EGR4       | 1961   | Q05215  | Early growth response 4                                         | Nucleic acid binding       | 17   | 0.751 | 0.538 | 0.01 | 0.01 |  | 1.00 | 1 | 0 | 2018 | 2018 |
| RMST       | 196475 |         | Rhabdomyosarcoma 2 associated transcript                        |                            | 19   | 0.769 | 0.385 |      | 0.01 |  | 1.00 | 1 | 0 | 2018 | 2018 |
| A2M        | 2      | P01023  | A-2-macroglobulin                                               | Enzyme modulator           | 147  | 0.529 | 0.769 | 0.00 | 0.01 |  | 1.00 | 1 | 0 | 2007 | 2007 |
| ELK1       | 2002   | P19419  | ETS transcription factor ELK1                                   | Transcription factor       | 114  | 0.537 | 0.692 | 0.94 | 0.01 |  | 1.00 | 1 | 0 | 2019 | 2019 |
| EPAS1      | 2034   | Q99814  | Endothelial PAS domain protein 1                                | Transcription factor       | 293  | 0.454 | 0.731 | 0.60 | 0.01 |  | 1.00 | 1 | 0 | 2017 | 2017 |
| ERCC4      | 2072   | Q92889  | ERCC excision repair 4, endonuclease catalytic subunit          | Enzyme                     | 325  | 0.468 | 0.846 | 0.00 | 0.01 |  | 1.00 | 1 | 1 | 2016 | 2016 |
| ETS1       | 2113   | P14921  | ETS proto-oncogene 1, transcription factor                      | Transcription factor       | 327  | 0.444 | 0.731 | 0.78 | 0.01 |  | 1.00 | 1 | 0 | 2018 | 2018 |
| ETV3       | 2117   | P41162  | ETS variant transcription factor 3                              | Transcription factor       | 36   | 0.67  | 0.577 | 0.98 | 0.01 |  | 1.00 | 1 | 0 | 2019 | 2019 |
| ABCD1      | 215    | P33897  | ATP binding cassette subfamily D member 1                       | Transporter                | 154  | 0.563 | 0.731 | 1.00 | 0.01 |  | 1.00 | 1 | 0 | 2019 | 2019 |
| F7         | 2155   | P08709  | Coagulation factor VII                                          | Enzyme                     | 99   | 0.623 | 0.615 | 0.00 | 0.01 |  | 1.00 | 1 | 0 | 2010 | 2010 |
| F8         | 2157   | P00451  | Coagulation factor VIII                                         | Enzyme                     | 149  | 0.542 | 0.769 | 1.00 | 0.01 |  | 1.00 | 1 | 0 | 2008 | 2008 |
| F9         | 2158   | P00740  | Coagulation factor IX                                           | Enzyme                     | 276  | 0.465 | 0.885 | 1.00 | 0.01 |  | 0.00 | 1 | 0 | 2017 | 2017 |
| FBLN1      | 2192   | P23142  | Fibulin 1                                                       |                            | 83   | 0.587 | 0.654 | 0.92 | 0.01 |  | 1.00 | 1 | 0 | 2019 | 2019 |
| FCGR3A     | 2214   | P08637  | Fc fragment of igg receptor iiia                                | Cell adhesion              | 352  | 0.432 | 0.962 | 0.00 | 0.01 |  | 1.00 | 1 | 0 | 2018 | 2018 |
| FCGR3B     | 2215   | O75015  | Fc fragment of igg receptor iiib                                | Cell adhesion              | 291  | 0.452 | 0.962 | 0.00 | 0.01 |  | 1.00 | 1 | 0 | 2018 | 2018 |
| FCN1       | 2219   | O00602  | Ficolin 1                                                       | Signaling                  | 43   | 0.647 | 0.577 | 0.00 | 0.01 |  | 1.00 | 1 | 0 | 2017 | 2017 |
| FGF1       | 2246   | P05230  | Fibroblast growth factor 1                                      | Signaling                  | 184  | 0.507 | 0.846 | 0.44 | 0.01 |  | 1.00 | 1 | 0 | 2017 | 2017 |
| FGF2       | 2247   | P09038  | Fibroblast growth factor 2                                      | Signaling                  | 635  | 0.383 | 0.923 | 0.02 | 0.01 |  | 1.00 | 1 | 0 | 2005 | 2005 |
| ABCD2      | 225    | Q9UBJ2  | ATP binding cassette subfamily D member 2                       | Transporter                | 25   | 0.711 | 0.5   | 0.00 | 0.01 |  | 1.00 | 1 | 0 | 2018 | 2018 |
| FGF13      | 2258   | Q92913  | Fibroblast growth factor 13                                     | Signaling                  | 167  | 0.514 | 0.808 | 0.89 | 0.01 |  | 1.00 | 1 | 0 | 2005 | 2005 |
| VEGFD      | 2277   | O43915  | Vascular endothelial growth factor D                            | Signaling                  | 132  | 0.538 | 0.769 | 0.00 | 0.01 |  | 1.00 | 1 | 0 | 2019 | 2019 |
| MRAS       | 22808  | O14807  | Muscle RAS oncogene homolog                                     | Enzyme modulator           | 113  | 0.59  | 0.731 | 0.92 | 0.01 |  | 1.00 | 1 | 3 | 2019 | 2019 |
| VASH1      | 22846  | Q7L8A9  | Vasohibin 1                                                     |                            | 69   | 0.601 | 0.423 | 0.33 | 0.01 |  | 1.00 | 1 | 0 | 2015 | 2015 |
| NTNG1      | 22854  | Q9Y2I2  | Netrin G1                                                       | Enzyme modulator           | 64   | 0.65  | 0.423 | 0.92 | 0.01 |  | 1.00 | 1 | 1 | 2013 | 2013 |
| CARD8      | 22900  | Q9Y2G2  | Caspase recruitment domain family member 8                      |                            | 78   | 0.59  | 0.731 | 0.00 | 0.01 |  | 1.00 | 1 | 1 | 2014 | 2014 |
| ATF6       | 22926  | P18850  | Activating transcription factor 6                               |                            | 179  | 0.516 | 0.846 | 0.00 | 0.01 |  | 1.00 | 1 | 0 | 2017 | 2017 |
| FOXF2      | 2295   | Q12947  | Forkhead box F2                                                 |                            | 57   | 0.621 | 0.5   | 0.85 | 0.01 |  | 1.00 | 1 | 1 | 2016 | 2016 |
| FAIM2      | 23017  | Q9BWQ8  | Fas apoptotic inhibitory molecule 2                             |                            | 48   | 0.663 | 0.5   | 0.00 | 0.01 |  | 1.00 | 1 | 0 | 2019 | 2019 |
| FOXO3      | 2309   | O43524  | Forkhead box O3                                                 |                            | 381  | 0.431 | 0.808 | 0.99 | 0.01 |  | 1.00 | 1 | 0 | 2018 | 2018 |
| MCF2L2     | 23101  | Q86YR7  | MCF.2 cell line derived transforming sequence-like 2            | Signaling                  | 60   | 0.628 | 0.577 | 0.00 | 0.01 |  | 1.00 | 1 | 0 | 2018 | 2018 |
| FLG        | 2312   | P20930  | Filaggrin                                                       | Cellular structure         | 173  | 0.525 | 0.846 | 0.00 | 0.01 |  | 1.00 | 1 | 0 | 2017 | 2017 |
| TBC1D9     | 23158  | Q6ZT07  | TBC1 domain family member 9                                     | Enzyme                     | 491  | 0.399 | 0.846 | 0.00 | 0.01 |  | 1.00 | 1 | 0 | 2012 | 2012 |
| MLC1       | 23209  | Q15049  | Modulator of VRAC current 1                                     | Ion channel                | 87   | 0.585 | 0.769 | 0.00 | 0.01 |  | 1.00 | 1 | 0 | 2018 | 2018 |
| ARC        | 23237  | Q7LC44  | Activity regulated cytoskeleton associated protein              |                            | 101  | 0.573 | 0.769 | 0.59 | 0.01 |  | 1.00 | 1 | 0 | 2018 | 2018 |
| CLEC16A    | 23274  | Q2KHT3  | C-type lectin domain containing 16A                             |                            | 67   | 0.612 | 0.654 | 0.28 | 0.01 |  | 1.00 | 1 | 1 | 2010 | 2010 |
| FMO3       | 2328   | P31513  | Flavin containing dimethylaniline monooxygenase 3               | Enzyme                     | 51   | 0.638 | 0.5   | 0.00 | 0.01 |  | 1.00 | 1 | 2 | 2013 | 2013 |
| CRTC1      | 23373  | Q6UUV9  | CREB regulated transcription coactivator 1                      | Transcription factor       | 115  | 0.565 | 0.692 | 0.53 | 0.01 |  | 1.00 | 1 | 0 | 2010 | 2010 |
| NCS1       | 23413  | P62166  | Neuronal calcium sensor 1                                       |                            | 48   | 0.656 | 0.615 | 0.66 | 0.01 |  | 1.00 | 1 | 0 | 2017 | 2017 |
| TRS-AGA2-3 | 23437  |         | Trna-Ser (anticodon AGA) 2-3                                    |                            | 21   | 0.743 | 0.385 |      | 0.01 |  | 1.00 | 1 | 0 | 2017 | 2017 |
| FOLH1      | 2346   | Q04609  | Folate hydrolase 1                                              | Enzyme                     | 311  | 0.453 | 0.885 | 0.00 | 0.01 |  | 1.00 | 1 | 0 | 2016 | 2016 |
| SPIDR      | 23514  | Q14159  | Scaffold protein involved in DNA repair                         |                            | 37   | 0.7   | 0.538 | 0.00 | 0.01 |  | 1.00 | 1 | 0 | 2015 | 2015 |
| FOS        | 2353   | P01100  | Fos proto-oncogene, AP-1 transcription factor subunit           | Transcription factor       | 528  | 0.411 | 0.885 | 0.26 | 0.01 |  | 1.00 | 1 | 0 | 2017 | 2017 |
| MMD        | 23531  | Q15546  | Monocyte to macrophage differentiation associated               | Receptor                   | 58   | 0.647 | 0.577 | 0.00 | 0.01 |  | 1.00 | 1 | 0 | 2009 | 2009 |
| MAPK8IP2   | 23542  | Q13387  | Mitogen-activated protein kinase 8 interacting protein 2        | Signaling                  | 51   | 0.628 | 0.654 | 1.00 | 0.01 |  | 1.00 | 1 | 0 | 2019 | 2019 |
| PADI4      | 23569  | Q9UM07  | Peptidyl arginine deiminase 4                                   |                            | 196  | 0.494 | 0.808 | 0.00 | 0.01 |  | 1.00 | 1 | 1 | 2013 | 2013 |
| SMUG1      | 23583  | Q53HV7  | Single-strand-selective monofunctional uracil-DNA glycosylase 1 |                            | 1034 | 0.322 | 0.923 | 0.00 | 0.01 |  | 1.00 | 1 | 0 | 2017 | 2017 |
| DAPK2      | 23604  | Q9UIK4  | Death associated protein kinase 2                               | Kinase                     | 130  | 0.536 | 0.692 | 0.00 | 0.01 |  | 1.00 | 1 | 0 | 2017 | 2017 |
| PLA2G15    | 23659  | Q8NCC3  | Phospholipase A2 group XV                                       | Enzyme                     | 170  | 0.52  | 0.769 | 0.38 | 0.01 |  | 1.00 | 1 | 0 | 2018 | 2018 |
| BCL2L13    | 23786  | Q9B XK5 | BCL2 like 13                                                    |                            | 18   | 0.78  | 0.308 | 0.00 | 0.01 |  | 1.00 | 1 | 0 | 2019 | 2019 |
| ABCA4      | 24     | P78363  | ATP binding cassette subfamily A member 4                       | Transporter                | 227  | 0.493 | 0.769 | 0.00 | 0.01 |  | 1.00 | 1 | 0 | 2015 | 2015 |
| PANX1      | 24145  | Q96RD7  | Pannexin 1                                                      | Ion channel                | 107  | 0.575 | 0.846 | 0.00 | 0.01 |  | 1.00 | 1 | 0 | 2018 | 2018 |
| G6PD       | 2539   | P11413  | Glucose-6-phosphate dehydrogenase                               | Enzyme                     | 410  | 0.424 | 0.846 | 0.97 | 0.01 |  | 0.00 | 1 | 0 | 2016 | 2016 |
| PRDX5      | 25824  | P30044  | Peroxisedoxin 5                                                 |                            | 153  | 0.522 | 0.808 | 0.00 | 0.01 |  | 1.00 | 1 | 0 | 2019 | 2019 |
| HECTD1     | 25831  | Q9ULT8  | HECT domain E3 ubiquitin protein ligase 1                       |                            | 14   | 0.751 | 0.385 | 1.00 | 0.01 |  | 1.00 | 1 | 0 | 2019 | 2019 |

|          |        |                                 |                                                                           |                            |     |       |       |      |      |  |      |   |   |      |      |
|----------|--------|---------------------------------|---------------------------------------------------------------------------|----------------------------|-----|-------|-------|------|------|--|------|---|---|------|------|
| GALNT2   | 2590   | Q10471                          | Polypeptide N-acetylglactosaminyltransferase 2                            | Enzyme                     | 45  | 0.678 | 0.538 | 0.01 | 0.01 |  | 1.00 | 1 | 1 | 2010 | 2010 |
| HSPA12A  | 259217 | O43301                          | Heat shock protein family A (Hsp70) member 12A                            |                            | 41  | 0.67  | 0.346 | 0.98 | 0.01 |  | 1.00 | 1 | 0 | 2018 | 2018 |
| FAM98A   | 25940  | Q8NCA5                          | Family with sequence similarity 98 member A                               |                            | 10  | 0.805 | 0.231 | 0.55 | 0.01 |  | 1.00 | 1 | 0 | 2018 | 2018 |
| GAP43    | 2596   | P17677                          | Growth associated protein 43                                              |                            | 109 | 0.564 | 0.731 | 0.02 | 0.01 |  | 1.00 | 1 | 0 | 2018 | 2018 |
| IS1      | 260402 |                                 | Adolescent idiopathic scoliosis                                           |                            | 83  | 0.593 | 0.615 |      | 0.01 |  | 1.00 | 1 | 0 | 2019 | 2019 |
| COPD     | 260431 |                                 | Pulmonary disease, chronic obstructive, severe early-onset                |                            | 349 | 0.456 | 0.885 |      | 0.01 |  | 1.00 | 1 | 0 | 2016 | 2016 |
| GATA1    | 2623   | P15976                          | GATA binding protein 1                                                    |                            | 264 | 0.483 | 0.808 | 0.95 | 0.01 |  | 1.00 | 1 | 0 | 2019 | 2019 |
| GATA3    | 2625   | P23771                          | GATA binding protein 3                                                    |                            | 429 | 0.415 | 0.846 | 0.90 | 0.01 |  | 1.00 | 1 | 0 | 2019 | 2019 |
| GCH1     | 2643   | P30793                          | GTP cyclohydrolase 1                                                      | Enzyme                     | 254 | 0.511 | 0.846 | 0.90 | 0.01 |  | 1.00 | 1 | 1 | 2011 | 2011 |
| GCKR     | 2646   | Q14397                          | Glucokinase regulator                                                     |                            | 136 | 0.604 | 0.615 | 0.00 | 0.01 |  | 1.00 | 1 | 0 | 2010 | 2010 |
| SLC17A5  | 26503  | Q9NRA2                          | Solute carrier family 17 member 5                                         | Transporter                | 252 | 0.491 | 0.808 | 0.00 | 0.01 |  | 1.00 | 1 | 0 | 2017 | 2017 |
| NPAS4    | 266743 | Q8IUM7                          | Neuronal PAS domain protein 4                                             | Transcription factor       | 36  | 0.695 | 0.5   | 0.97 | 0.01 |  | 1.00 | 1 | 0 | 2015 | 2015 |
| GEM      | 2669   | P55040                          | GTP binding protein overexpressed in skeletal muscle                      |                            | 251 | 0.467 | 0.769 | 0.00 | 0.01 |  | 1.00 | 1 | 0 | 2019 | 2019 |
| HAVCR1   | 26762  | Q96D42                          | Hepatitis A virus cellular receptor 1                                     |                            | 217 | 0.489 | 0.885 | 0.00 | 0.01 |  | 1.00 | 1 | 1 | 2018 | 2018 |
| GGCX     | 2677   | P38435                          | Γ-glutamyl carboxylase                                                    |                            | 56  | 0.678 | 0.538 | 0.00 | 0.01 |  | 1.00 | 1 | 0 | 2007 | 2007 |
| GHRH     | 2691   | P01286                          | Growth hormone releasing hormone                                          | Signaling                  | 176 | 0.503 | 0.769 | 0.15 | 0.01 |  | 1.00 | 1 | 0 | 2018 | 2018 |
| GJA1     | 2697   | P17302                          | Gap junction protein α 1                                                  | Cell-cell junction         | 662 | 0.393 | 0.885 | 0.16 | 0.01 |  | 1.00 | 1 | 0 | 2019 | 2019 |
| NAAA     | 27163  | Q02083                          | N-acylethanolamine acid amidase                                           | Enzyme                     | 90  | 0.579 | 0.692 | 0.00 | 0.01 |  | 0.00 | 1 | 0 | 2016 | 2016 |
| IL17B    | 27190  | Q9UHF5                          | Interleukin 17B                                                           |                            | 116 | 0.553 | 0.769 | 0.03 | 0.01 |  | 1.00 | 1 | 0 | 2009 | 2009 |
| GCLC     | 2729   | P48506                          | Glutamate-cysteine ligase catalytic subunit                               | Enzyme                     | 198 | 0.509 | 0.885 | 0.43 | 0.01 |  | 1.00 | 1 | 0 | 2018 | 2018 |
| STK39    | 27347  | Q9UEW8                          | Serine/threonine kinase 39                                                | Kinase                     | 38  | 0.67  | 0.5   | 1.00 | 0.01 |  | 1.00 | 1 | 0 | 2017 | 2017 |
| GLI2     | 2736   | P10070                          | GLI family zinc finger 2                                                  |                            | 351 | 0.446 | 0.846 | 0.97 | 0.01 |  | 1.00 | 1 | 0 | 2018 | 2018 |
| HTRA2    | 27429  | O43464                          | Htra serine peptidase 2                                                   |                            | 151 | 0.542 | 0.692 | 0.00 | 0.01 |  | 0.00 | 1 | 0 | 2018 | 2018 |
| GNAS     | 2778   | O95467;P63092;<br>P84996;Q5JWF2 | GNAS complex locus                                                        | Enzyme modulator           | 536 | 0.42  | 0.885 | 0.68 | 0.01 |  | 1.00 | 1 | 0 | 2012 | 2012 |
| GNB3     | 2784   | P16520                          | G protein subunit β 3                                                     | Enzyme                     | 192 | 0.518 | 0.808 | 0.00 | 0.01 |  | 0.00 | 1 | 1 | 2005 | 2005 |
| GOT2     | 2806   | P00505                          | Glutamic-oxaloacetic transaminase 2                                       |                            | 148 | 0.529 | 0.731 | 0.01 | 0.01 |  | 1.00 | 1 | 0 | 2018 | 2018 |
| GPI      | 2821   | P06744                          | Glucose-6-phosphate isomerase                                             | Enzyme                     | 218 | 0.491 | 0.769 | 0.00 | 0.01 |  | 1.00 | 1 | 0 | 2018 | 2018 |
| H19      | 283120 |                                 | H19 imprinted maternally expressed transcript                             |                            | 242 | 0.494 | 0.923 |      | 0.01 |  | 1.00 | 1 | 3 | 2017 | 2017 |
| ANGPT2   | 285    | O15123                          | Angiopietin 2                                                             | Signaling                  | 457 | 0.41  | 0.846 | 0.83 | 0.01 |  | 1.00 | 1 | 0 | 2014 | 2014 |
| SNHG15   | 285958 |                                 | Small nucleolar RNA host gene 15                                          |                            | 48  | 0.633 | 0.615 |      | 0.01 |  | 1.00 | 1 | 0 | 2018 | 2018 |
| ANK1     | 286    | P16157                          | Ankyrin 1                                                                 |                            | 166 | 0.54  | 0.885 | 1.00 | 0.01 |  | 1.00 | 1 | 0 | 2019 | 2019 |
| XKR6     | 286046 | Q5GH73                          | XK related 6                                                              |                            | 25  | 0.729 | 0.538 | 1.00 | 0.01 |  | 1.00 | 1 | 1 | 2019 | 2019 |
| GPR37    | 2861   | O15354                          | G protein-coupled receptor 37                                             | G-protein coupled receptor | 23  | 0.716 | 0.385 | 0.00 | 0.01 |  | 1.00 | 1 | 0 | 2019 | 2019 |
| GPR42    | 2866   | O15529                          | G protein-coupled receptor 42 (gene/pseudogene)                           | G-protein coupled receptor | 255 | 0.475 | 0.846 | 0.05 | 0.01 |  | 1.00 | 1 | 0 | 2015 | 2015 |
| GPT      | 2875   | P24298                          | Glutamic--pyruvic transaminase                                            | Enzyme                     | 511 | 0.403 | 0.923 | 0.00 | 0.01 |  | 1.00 | 1 | 0 | 2018 | 2018 |
| GPX1     | 2876   | P07203                          | Glutathione peroxidase 1                                                  | Enzyme                     | 290 | 0.458 | 0.923 | 0.00 | 0.01 |  | 1.00 | 1 | 1 | 2017 | 2017 |
| REM1     | 28954  | O75628                          | RRAD and GEM like gtpase 1                                                |                            | 177 | 0.531 | 0.885 | 0.00 | 0.01 |  | 1.00 | 1 | 0 | 2013 | 2013 |
| GRN      | 2896   | P28799                          | Granulin precursor                                                        |                            | 412 | 0.435 | 0.846 | 0.07 | 0.01 |  | 1.00 | 1 | 0 | 2020 | 2020 |
| GRIK2    | 2898   | Q13002                          | Glutamate ionotropic receptor kainate type subunit 2                      | Ion channel                | 130 | 0.561 | 0.769 | 1.00 | 0.01 |  | 1.00 | 1 | 0 | 2014 | 2014 |
| ANPEP    | 290    | P15144                          | Alanyl aminopeptidase, membrane                                           | Enzyme                     | 280 | 0.462 | 0.769 | 0.00 | 0.01 |  | 1.00 | 1 | 0 | 2017 | 2017 |
| GRIN2B   | 2904   | Q13224                          | Glutamate ionotropic receptor NMDA type subunit 2B                        | Ion channel                | 249 | 0.51  | 0.692 | 1.00 | 0.01 |  | 1.00 | 1 | 0 | 2018 | 2018 |
| GRIN2C   | 2905   | Q14957                          | Glutamate ionotropic receptor NMDA type subunit 2C                        | Ion channel                | 11  | 0.792 | 0.269 | 0.00 | 0.01 |  | 1.00 | 1 | 0 | 2018 | 2018 |
| GRINA    | 2907   | Q7Z429                          | Glutamate ionotropic receptor NMDA type subunit associated protein 1      |                            | 15  | 0.76  | 0.346 | 0.44 | 0.01 |  | 1.00 | 1 | 0 | 2019 | 2019 |
| SETD2    | 29072  | Q9BYW2                          | SET domain containing 2, histone lysine methyltransferase                 | Epigenetic regulator       | 447 | 0.424 | 0.846 | 1.00 | 0.01 |  | 1.00 | 1 | 0 | 2019 | 2019 |
| GRM1     | 2911   | Q13255                          | Glutamate metabotropic receptor 1                                         | G-protein coupled receptor | 172 | 0.528 | 0.808 | 0.14 | 0.01 |  | 1.00 | 1 | 0 | 2019 | 2019 |
| GRM2     | 2912   | Q14416                          | Glutamate metabotropic receptor 2                                         | G-protein coupled receptor | 104 | 0.582 | 0.577 | 0.12 | 0.01 |  | 1.00 | 1 | 0 | 2005 | 2005 |
| CXCL1    | 2919   | P09341                          | C-X-C motif chemokine ligand 1                                            | Signaling                  | 315 | 0.449 | 0.923 | 0.12 | 0.01 |  | 1.00 | 1 | 1 | 2013 | 2013 |
| GSTM1    | 2944   | P09488                          | Glutathione S-transferase μ 1                                             |                            | 627 | 0.38  | 0.923 | 0.00 | 0.01 |  | 1.00 | 1 | 0 | 2010 | 2010 |
| GSTT1    | 2952   | P30711                          | Glutathione S-transferase θ 1                                             |                            | 541 | 0.393 | 0.923 | 0.00 | 0.01 |  | 1.00 | 1 | 0 | 2010 | 2010 |
| UBQLN1   | 29979  | Q9UMX0                          | Ubiquilin 1                                                               |                            | 49  | 0.65  | 0.423 | 1.00 | 0.01 |  | 0.00 | 1 | 0 | 2017 | 2017 |
| NOP53    | 29997  | Q9NZM5                          | NOP53 ribosome biogenesis factor                                          |                            | 69  | 0.597 | 0.577 | 0.18 | 0.01 |  | 1.00 | 1 | 0 | 2017 | 2017 |
| ANXA1    | 301    | P04083                          | Annexin A1                                                                |                            | 336 | 0.442 | 0.885 | 0.00 | 0.01 |  | 1.00 | 1 | 0 | 2018 | 2018 |
| HADHA    | 3030   | P40939                          | Hydroxyacyl-coa dehydrogenase trifunctional multienzyme complex subunit α | Enzyme                     | 154 | 0.569 | 0.769 | 0.00 | 0.01 |  | 1.00 | 1 | 0 | 2018 | 2018 |
| HCRT     | 3060   | O43612                          | Hypocretin neuropeptide precursor                                         |                            | 237 | 0.5   | 0.808 | 0.03 | 0.01 |  | 1.00 | 1 | 0 | 2017 | 2017 |
| HDLBP    | 3069   | Q00341                          | High density lipoprotein binding protein                                  |                            | 58  | 0.636 | 0.731 | 1.00 | 0.01 |  | 1.00 | 1 | 0 | 2019 | 2019 |
| HK2      | 3099   | P52789                          | Hexokinase 2                                                              | Kinase                     | 152 | 0.515 | 0.769 | 0.00 | 0.01 |  | 1.00 | 1 | 0 | 2017 | 2017 |
| ACACA    | 31     | Q13085                          | Acetyl-coa carboxylase α                                                  |                            | 241 | 0.48  | 0.846 | 1.00 | 0.01 |  | 1.00 | 1 | 0 | 2019 | 2019 |
| HLA-B    | 3106   | P01889                          | Major histocompatibility complex, class I, B                              |                            | 706 | 0.379 | 0.885 | 0.00 | 0.01 |  | 1.00 | 1 | 0 | 2019 | 2019 |
| HLA-C    | 3107   | P10321                          | Major histocompatibility complex, class I, C                              |                            | 435 | 0.415 | 0.846 | 0.00 | 0.01 |  | 0.00 | 1 | 0 | 2017 | 2017 |
| HLA-DQB1 | 3119   | P01920                          | Major histocompatibility complex, class II, DQ β 1                        | Immune response            | 504 | 0.407 | 0.885 | 0.01 | 0.01 |  | 1.00 | 1 | 0 | 2019 | 2019 |
| HLA-G    | 3135   | P17693                          | Major histocompatibility complex, class I, G                              |                            | 279 | 0.461 | 0.769 | 0.00 | 0.01 |  | 1.00 | 1 | 0 | 2020 | 2020 |
| AOC2     | 314    | O75106                          | Amine oxidase copper containing 2                                         |                            | 37  | 0.674 | 0.654 | 0.00 | 0.01 |  | 1.00 | 1 | 0 | 2017 | 2017 |
| NR4A1    | 3164   | P22736                          | Nuclear receptor subfamily 4 group A member 1                             | Nuclear receptor           | 216 | 0.49  | 0.731 | 0.37 | 0.01 |  | 1.00 | 1 | 0 | 2019 | 2019 |
| HP       | 3240   | P00738                          | Haptoglobin                                                               | Enzyme                     | 464 | 0.412 | 0.885 | 0.00 | 0.01 |  | 1.00 | 1 | 0 | 2017 | 2017 |
| MMAB     | 326625 | Q96EY8                          | Metabolism of cobalamin associated B                                      | Enzyme                     | 46  | 0.695 | 0.538 | 0.00 | 0.01 |  | 1.00 | 1 | 1 | 2017 | 2017 |
| SERPINA9 | 327657 | Q86WD7                          | Serpin family A member 9                                                  | Enzyme modulator           | 14  | 0.769 | 0.231 | 0.00 | 0.01 |  | 1.00 | 1 | 0 | 2008 | 2008 |
| HES1     | 3280   | Q14469                          | Hes family bhlh transcription factor 1                                    | Transcription factor       | 243 | 0.468 | 0.885 | 0.71 | 0.01 |  | 1.00 | 1 | 0 | 2020 | 2020 |
| BIRC5    | 332    | O15392                          | Baculoviral IAP repeat containing 5                                       | Enzyme modulator           | 199 | 0.495 | 0.731 | 0.06 | 0.01 |  | 1.00 | 1 | 0 | 2014 | 2014 |
| HSPG2    | 3339   | P98160                          | Heparan sulfate proteoglycan 2                                            | Enzyme modulator           | 405 | 0.438 | 0.885 | 0.00 | 0.01 |  | 1.00 | 1 | 0 | 2019 | 2019 |
| HTR1A    | 3350   | P08908                          | 5-hydroxytryptamine receptor 1A                                           | G-protein coupled receptor | 229 | 0.522 | 0.846 | 0.20 | 0.01 |  | 1.00 | 1 | 0 | 2020 | 2020 |
| HTR2A    | 3356   | P28223                          | 5-hydroxytryptamine receptor 2A                                           | G-protein coupled receptor | 289 | 0.473 | 0.846 | 0.51 | 0.01 |  | 1.00 | 1 | 1 | 2006 | 2006 |

|           |        |        |                                                                                        |                      |     |       |       |      |      |  |      |   |   |      |      |
|-----------|--------|--------|----------------------------------------------------------------------------------------|----------------------|-----|-------|-------|------|------|--|------|---|---|------|------|
| FFAR4     | 338557 | Q5NUL3 | Free fatty acid receptor 4                                                             |                      | 67  | 0.621 | 0.577 | 0.00 | 0.01 |  | 1.00 | 1 | 0 | 2019 | 2019 |
| C1QTNF9   | 338872 | P0C862 | C1q and TNF related 9                                                                  |                      | 30  | 0.695 | 0.385 | 0.00 | 0.01 |  | 1.00 | 1 | 0 | 2019 | 2019 |
| ID2       | 3398   | Q02363 | Inhibitor of DNA binding 2                                                             | Transcription factor | 92  | 0.572 | 0.731 | 0.67 | 0.01 |  | 1.00 | 1 | 0 | 2020 | 2020 |
| IFIT3     | 3437   | O14879 | Interferon induced protein with tetratricopeptide repeats 3                            |                      | 51  | 0.628 | 0.731 | 0.12 | 0.01 |  | 1.00 | 1 | 0 | 2017 | 2017 |
| ACTBL2    | 345651 | Q562R1 | Actin $\beta$ like 2                                                                   |                      | 134 | 0.539 | 0.769 | 0.00 | 0.01 |  | 1.00 | 1 | 0 | 2010 | 2010 |
| APOD      | 347    | P05090 | Apolipoprotein D                                                                       |                      | 89  | 0.584 | 0.577 | 0.00 | 0.01 |  | 1.00 | 1 | 1 | 2014 | 2014 |
| MAGEB5    | 347541 | Q9BZ81 | MAGE family member B5                                                                  |                      | 2   | 0.931 | 0.115 |      | 0.01 |  | 1.00 | 1 | 0 | 2016 | 2016 |
| IGF1R     | 3480   | P08069 | Insulin like growth factor 1 receptor                                                  | Kinase               | 556 | 0.399 | 0.885 | 0.97 | 0.01 |  | 1.00 | 1 | 1 | 2008 | 2008 |
| IGFBP3    | 3486   | P17936 | Insulin like growth factor binding protein 3                                           | Enzyme modulator     | 350 | 0.439 | 0.808 | 0.91 | 0.01 |  | 1.00 | 1 | 0 | 2017 | 2017 |
| IKBKB     | 3551   | O14920 | Inhibitor of nuclear factor $\kappa$ B kinase subunit $\beta$                          | Kinase               | 191 | 0.506 | 0.846 | 0.99 | 0.01 |  | 1.00 | 1 | 0 | 2017 | 2017 |
| IL2       | 3558   | P60568 | Interleukin 2                                                                          |                      | 950 | 0.336 | 0.885 | 0.48 | 0.01 |  | 1.00 | 1 | 0 | 2018 | 2018 |
| IL4R      | 3566   | P24394 | Interleukin 4 receptor                                                                 | Receptor             | 242 | 0.474 | 0.846 | 0.00 | 0.01 |  | 1.00 | 1 | 0 | 2018 | 2018 |
| IL5       | 3567   | P05113 | Interleukin 5                                                                          |                      | 359 | 0.437 | 0.846 | 0.01 | 0.01 |  | 1.00 | 1 | 0 | 2016 | 2016 |
| IL7R      | 3575   | P16871 | Interleukin 7 receptor                                                                 | Receptor             | 231 | 0.487 | 0.769 | 0.00 | 0.01 |  | 1.00 | 1 | 0 | 2019 | 2019 |
| AQP1      | 358    | P29972 | Aquaporin 1 (Colton blood group)                                                       | Ion channel          | 268 | 0.467 | 0.885 | 0.00 | 0.01 |  | 1.00 | 1 | 0 | 2017 | 2017 |
| IL10RA    | 3587   | Q13651 | Interleukin 10 receptor subunit $\alpha$                                               | Receptor             | 90  | 0.579 | 0.692 | 0.02 | 0.01 |  | 1.00 | 1 | 0 | 2013 | 2013 |
| IL10RB    | 3588   | Q08334 | Interleukin 10 receptor subunit $\beta$                                                | Receptor             | 50  | 0.636 | 0.577 | 0.00 | 0.01 |  | 1.00 | 1 | 2 | 2013 | 2013 |
| IL16      | 3603   | Q14005 | Interleukin 16                                                                         | Signaling            | 193 | 0.501 | 0.846 | 0.00 | 0.01 |  | 1.00 | 1 | 0 | 2013 | 2013 |
| TNFRSF9   | 3604   | Q07011 | TNF receptor superfamily member 9                                                      |                      | 177 | 0.502 | 0.769 | 0.32 | 0.01 |  | 1.00 | 1 | 2 | 2017 | 2017 |
| INSRR     | 3645   | P14616 | Insulin receptor related receptor                                                      | Kinase               | 186 | 0.508 | 0.808 | 0.00 | 0.01 |  | 1.00 | 1 | 0 | 2018 | 2018 |
| IRAK1     | 3654   | P51617 | Interleukin 1 receptor associated kinase 1                                             | Kinase               | 200 | 0.506 | 0.808 | 0.99 | 0.01 |  | 1.00 | 1 | 0 | 2017 | 2017 |
| IRS1      | 3667   | P35568 | Insulin receptor substrate 1                                                           |                      | 233 | 0.488 | 0.769 | 0.02 | 0.01 |  | 1.00 | 1 | 0 | 2016 | 2016 |
| ABCC6     | 368    | O95255 | ATP binding cassette subfamily C member 6                                              | Transporter          | 181 | 0.54  | 0.654 | 0.00 | 0.01 |  | 1.00 | 1 | 1 | 2018 | 2018 |
| ITGB2     | 3689   | P05107 | Integrin subunit $\beta$ 2                                                             | Receptor             | 340 | 0.444 | 0.923 | 0.00 | 0.01 |  | 1.00 | 1 | 0 | 2016 | 2016 |
| JAK3      | 3718   | P52333 | Janus kinase 3                                                                         | Kinase               | 194 | 0.505 | 0.731 | 0.00 | 0.01 |  | 1.00 | 1 | 0 | 2017 | 2017 |
| JUNB      | 3726   | P17275 | Junb proto-oncogene, AP-1 transcription factor subunit                                 | Transcription factor | 264 | 0.467 | 0.769 | 0.86 | 0.01 |  | 1.00 | 1 | 0 | 2017 | 2017 |
| AREG      | 374    | P15514 | Amphiregulin                                                                           | Signaling            | 221 | 0.487 | 0.769 | 0.35 | 0.01 |  | 1.00 | 1 | 0 | 2019 | 2019 |
| PEAR1     | 375033 | Q5VY43 | Platelet endothelial aggregation receptor 1                                            |                      | 27  | 0.722 | 0.346 | 0.00 | 0.01 |  | 1.00 | 1 | 0 | 2016 | 2016 |
| KDR       | 3791   | P35968 | Kinase insert domain receptor                                                          | Kinase               | 623 | 0.378 | 0.885 | 1.00 | 0.01 |  | 1.00 | 1 | 1 | 1999 | 1999 |
| KIR2DS1   | 3806   | Q14954 | Killer cell immunoglobulin like receptor, two Ig domains and short cytoplasmic tail 1  | Receptor             | 123 | 0.537 | 0.769 |      | 0.01 |  | 1.00 | 1 | 0 | 2019 | 2019 |
| KIR3DL1   | 3811   | P43629 | Killer cell immunoglobulin like receptor, three Ig domains and long cytoplasmic tail 1 | Receptor             | 231 | 0.475 | 0.769 | 0.00 | 0.01 |  | 1.00 | 1 | 0 | 2019 | 2019 |
| KIR3DL2   | 3812   | P43630 | Killer cell immunoglobulin like receptor, three Ig domains and long cytoplasmic tail 2 | Receptor             | 118 | 0.543 | 0.769 | 0.00 | 0.01 |  | 1.00 | 1 | 0 | 2019 | 2019 |
| KRT18     | 3875   | P05783 | Keratin 18                                                                             |                      | 151 | 0.53  | 0.692 | 0.73 | 0.01 |  | 1.00 | 1 | 0 | 2019 | 2019 |
| C11orf96  | 387763 | Q7Z7L8 | Chromosome 11 open reading frame 96                                                    |                      | 3   | 0.89  | 0.154 | 0.01 | 0.01 |  | 1.00 | 1 | 0 | 2017 | 2017 |
| TSPYL6    | 388951 | Q8N831 | TSPY like 6                                                                            |                      | 4   | 0.89  | 0.154 |      | 0.01 |  | 1.00 | 1 | 1 | 2017 | 2017 |
| LAD1      | 3898   | O00515 | Ladinin 1                                                                              | Cellular structure   | 87  | 0.584 | 0.731 | 0.00 | 0.01 |  | 1.00 | 1 | 0 | 2016 | 2016 |
| LAMA5     | 3911   | O15230 | Laminin subunit $\alpha$ 5                                                             | Enzyme modulator     | 56  | 0.636 | 0.577 | 0.01 | 0.01 |  | 1.00 | 1 | 0 | 2019 | 2019 |
| LAMC2     | 3918   | Q13753 | Laminin subunit $\gamma$ 2                                                             | Enzyme modulator     | 602 | 0.389 | 0.923 | 0.00 | 0.01 |  | 1.00 | 1 | 0 | 2018 | 2018 |
| LAMP2     | 3920   | P13473 | Lysosomal associated membrane protein 2                                                | Transporter          | 134 | 0.552 | 0.731 | 0.27 | 0.01 |  | 1.00 | 1 | 0 | 2019 | 2019 |
| RPSA      | 3921   | P08865 | Ribosomal protein SA                                                                   | Nucleic acid binding | 221 | 0.485 | 0.769 | 0.93 | 0.01 |  | 1.00 | 1 | 0 | 2014 | 2014 |
| LCP1      | 3936   | P13796 | Lymphocyte cytosolic protein 1                                                         | Cellular structure   | 44  | 0.663 | 0.654 | 0.55 | 0.01 |  | 1.00 | 1 | 0 | 2020 | 2020 |
| LEPR      | 3953   | P48357 | Leptin receptor                                                                        | Signaling            | 416 | 0.433 | 0.808 | 0.99 | 0.01 |  | 1.00 | 1 | 3 | 2015 | 2015 |
| LGALS9    | 3965   | O00182 | Galectin 9                                                                             | Signaling            | 197 | 0.496 | 0.769 | 0.00 | 0.01 |  | 1.00 | 1 | 0 | 2017 | 2017 |
| LIG4      | 3981   | P49917 | DNA ligase 4                                                                           |                      | 293 | 0.478 | 0.846 | 0.00 | 0.01 |  | 1.00 | 1 | 0 | 2018 | 2018 |
| LIMK1     | 3984   | P53667 | LIM domain kinase 1                                                                    | Kinase               | 271 | 0.488 | 0.731 | 1.00 | 0.01 |  | 1.00 | 1 | 0 | 2017 | 2017 |
| LOXL1     | 4016   | Q08397 | Lysyl oxidase like 1                                                                   |                      | 93  | 0.59  | 0.615 | 0.89 | 0.01 |  | 1.00 | 1 | 0 | 2011 | 2011 |
| LRP1      | 4035   | Q07954 | LDL receptor related protein 1                                                         |                      | 252 | 0.482 | 0.769 | 1.00 | 0.01 |  | 1.00 | 1 | 0 | 2015 | 2015 |
| LRP6      | 4040   | O75581 | LDL receptor related protein 6                                                         |                      | 134 | 0.536 | 0.808 | 0.70 | 0.01 |  | 1.00 | 1 | 0 | 2015 | 2015 |
| LINC01194 | 404663 |        | Long intergenic non-protein coding RNA 1194                                            |                      | 249 | 0.47  | 0.769 |      | 0.01 |  | 1.00 | 1 | 0 | 2018 | 2018 |
| CIMT      | 404677 |        | Carotid intimal medial thickness                                                       |                      | 29  | 0.695 | 0.462 |      | 0.01 |  | 1.00 | 1 | 0 | 2018 | 2018 |
| MIRLET7B  | 406884 |        | Microma let-7b                                                                         |                      | 186 | 0.493 | 0.769 |      | 0.01 |  | 1.00 | 1 | 0 | 2013 | 2013 |
| MIRLET7E  | 406887 |        | Microma let-7e                                                                         |                      | 72  | 0.592 | 0.769 |      | 0.01 |  | 1.00 | 1 | 1 | 2016 | 2016 |
| MIRLET7I  | 406891 |        | Microma let-7i                                                                         |                      | 86  | 0.575 | 0.615 |      | 0.01 |  | 1.00 | 1 | 1 | 2017 | 2017 |
| MIR106A   | 406899 |        | Microma 106a                                                                           |                      | 140 | 0.524 | 0.846 |      | 0.01 |  | 1.00 | 1 | 0 | 2015 | 2015 |
| MIR125B2  | 406912 |        | Microma 125b-2                                                                         |                      | 38  | 0.659 | 0.423 |      | 0.01 |  | 1.00 | 1 | 0 | 2017 | 2017 |
| MIR129-2  | 406918 |        | Microma 129-2                                                                          |                      | 43  | 0.653 | 0.654 |      | 0.01 |  | 1.00 | 1 | 0 | 2019 | 2019 |
| MIR130B   | 406920 |        | Microma 130b                                                                           |                      | 115 | 0.547 | 0.808 |      | 0.01 |  | 1.00 | 1 | 0 | 2016 | 2016 |
| MIR140    | 406932 |        | Microma 140                                                                            |                      | 144 | 0.522 | 0.769 |      | 0.01 |  | 1.00 | 1 | 0 | 2016 | 2016 |
| MIR144    | 406936 |        | Microma 144                                                                            |                      | 175 | 0.5   | 0.769 |      | 0.01 |  | 1.00 | 1 | 0 | 2016 | 2016 |
| MIR152    | 406943 |        | Microma 152                                                                            |                      | 136 | 0.521 | 0.769 |      | 0.01 |  | 1.00 | 1 | 0 | 2019 | 2019 |
| MIR17     | 406952 |        | Microma 17                                                                             |                      | 270 | 0.459 | 0.846 |      | 0.01 |  | 1.00 | 1 | 0 | 2019 | 2019 |
| MIR185    | 406961 |        | Microma 185                                                                            |                      | 106 | 0.551 | 0.808 |      | 0.01 |  | 1.00 | 1 | 0 | 2015 | 2015 |
| MIR192    | 406967 |        | Microma 192                                                                            |                      | 173 | 0.503 | 0.846 |      | 0.01 |  | 1.00 | 1 | 0 | 2019 | 2019 |
| MIR195    | 406971 |        | Microma 195                                                                            |                      | 180 | 0.496 | 0.769 |      | 0.01 |  | 1.00 | 1 | 0 | 2018 | 2018 |
| MIR199B   | 406978 |        | Microma 199b                                                                           |                      | 71  | 0.588 | 0.615 |      | 0.01 |  | 1.00 | 1 | 0 | 2019 | 2019 |
| MIR200C   | 406985 |        | Microma 200c                                                                           |                      | 202 | 0.486 | 0.846 |      | 0.01 |  | 1.00 | 1 | 0 | 2019 | 2019 |
| MIR206    | 406989 |        | Microma 206                                                                            |                      | 226 | 0.477 | 0.846 |      | 0.01 |  | 1.00 | 1 | 0 | 2019 | 2019 |
| MIR212    | 406994 |        | Microma 212                                                                            |                      | 126 | 0.535 | 0.808 |      | 0.01 |  | 1.00 | 1 | 0 | 2019 | 2019 |
| MIR216A   | 406998 |        | Microma 216a                                                                           |                      | 79  | 0.582 | 0.654 |      | 0.01 |  | 1.00 | 1 | 0 | 2018 | 2018 |
| MIR219A1  | 407002 |        | Microma 219a-1                                                                         |                      | 75  | 0.595 | 0.615 |      | 0.01 |  | 1.00 | 1 | 0 | 2015 | 2015 |
| MIR22     | 407004 |        | Microma 22                                                                             |                      | 195 | 0.496 | 0.808 |      | 0.01 |  | 1.00 | 1 | 0 | 2019 | 2019 |
| MIR221    | 407006 |        | Microma 221                                                                            |                      | 304 | 0.449 | 0.846 |      | 0.01 |  | 1.00 | 1 | 0 | 2017 | 2017 |
| MIR30D    | 407033 |        | Microma 30d                                                                            |                      | 97  | 0.563 | 0.654 |      | 0.01 |  | 1.00 | 1 | 0 | 2018 | 2018 |
| MIR31     | 407035 |        | Microma 31                                                                             |                      | 235 | 0.471 | 0.769 |      | 0.01 |  | 1.00 | 1 | 0 | 2020 | 2020 |

|          |        |        |                                                          |                            |     |       |       |      |      |  |      |   |   |      |      |
|----------|--------|--------|----------------------------------------------------------|----------------------------|-----|-------|-------|------|------|--|------|---|---|------|------|
| MIR34A   | 407040 |        | Microrna 34a                                             |                            | 428 | 0.421 | 0.846 |      | 0.01 |  | 1.00 | 1 | 3 | 2019 | 2019 |
| MIR93    | 407050 |        | Microrna 93                                              |                            | 171 | 0.507 | 0.808 |      | 0.01 |  | 1.00 | 1 | 0 | 2019 | 2019 |
| ARRB2    | 409    | P32121 | Arrestin β 2                                             | Enzyme modulator           | 119 | 0.561 | 0.769 | 0.51 | 0.01 |  | 1.00 | 1 | 0 | 2019 | 2019 |
| MAPT     | 4137   | P10636 | Microtubule associated protein tau                       |                            | 469 | 0.446 | 0.923 | 0.01 | 0.01 |  | 1.00 | 1 | 0 | 2019 | 2019 |
| MBL2     | 4153   | P11226 | Mannose binding lectin 2                                 | Receptor                   | 563 | 0.39  | 0.846 | 0.00 | 0.01 |  | 1.00 | 1 | 0 | 2019 | 2019 |
| MDK      | 4192   | P21741 | Midkine                                                  | Signaling                  | 209 | 0.494 | 0.808 | 0.23 | 0.01 |  | 1.00 | 1 | 0 | 2018 | 2018 |
| MDM2     | 4193   | Q00987 | MDM2 proto-oncogene                                      | Nucleic acid binding       | 702 | 0.362 | 0.846 | 1.00 | 0.01 |  | 1.00 | 1 | 0 | 2018 | 2018 |
| CIITA    | 4261   | P33076 | Class II major histocompatibility complex transactivator |                            | 149 | 0.536 | 0.808 | 0.00 | 0.01 |  | 1.00 | 1 | 0 | 2008 | 2008 |
| NR3C2    | 4306   | P08235 | Nuclear receptor subfamily 3 group C member 2            | Nuclear receptor           | 287 | 0.469 | 0.846 | 0.84 | 0.01 |  | 1.00 | 1 | 0 | 2011 | 2011 |
| MOG      | 4340   | Q16653 | Myelin oligodendrocyte glycoprotein                      | Enzyme modulator           | 136 | 0.546 | 0.731 | 0.14 | 0.01 |  | 1.00 | 1 | 0 | 2018 | 2018 |
| MRC1     | 4360   | P22897 | Mannose receptor C-type 1                                |                            | 431 | 0.413 | 0.846 | 0.94 | 0.01 |  | 1.00 | 1 | 0 | 2018 | 2018 |
| MIAT     | 440823 |        | Myocardial infarction associated transcript              |                            | 84  | 0.573 | 0.692 |      | 0.01 |  | 1.00 | 1 | 0 | 2018 | 2018 |
| POTEKP   | 440915 | Q9BYX7 | POTE ankyrin domain family member K, pseudogene          |                            | 131 | 0.542 | 0.769 |      | 0.01 |  | 1.00 | 1 | 0 | 2010 | 2010 |
| ZFAS1    | 441951 |        | ZNFX1 antisense RNA 1                                    |                            | 82  | 0.582 | 0.615 |      | 0.01 |  | 1.00 | 1 | 0 | 2019 | 2019 |
| MIR326   | 442900 |        | Microrna 326                                             |                            | 95  | 0.56  | 0.731 |      | 0.01 |  | 1.00 | 1 | 0 | 2018 | 2018 |
| MSD      | 4434   |        | Microcephaly with spastic diplegia (Paine syndrome)      |                            | 35  | 0.674 | 0.654 |      | 0.01 |  | 1.00 | 1 | 0 | 2019 | 2019 |
| MSR1     | 4481   | P21757 | Macrophage scavenger receptor 1                          | Enzyme                     | 108 | 0.553 | 0.654 | 0.00 | 0.01 |  | 1.00 | 1 | 0 | 2017 | 2017 |
| PLF      | 450095 |        | Pulmonary function                                       |                            | 124 | 0.544 | 0.731 |      | 0.01 |  | 1.00 | 1 | 0 | 2019 | 2019 |
| MTAP     | 4507   | Q13126 | Methylthioadenosine phosphorylase                        | Enzyme                     | 167 | 0.514 | 0.731 | 0.00 | 0.01 |  | 1.00 | 1 | 1 | 2009 | 2009 |
| CYTB     | 4519   | P00156 | Cytochrome b                                             |                            | 166 | 0.529 | 0.808 |      | 0.01 |  | 0.00 | 1 | 0 | 2011 | 2011 |
| MUSK     | 4593   | O15146 | Muscle associated receptor tyrosine kinase               | Kinase                     | 146 | 0.57  | 0.769 | 0.00 | 0.01 |  | 1.00 | 1 | 0 | 2014 | 2014 |
| MMUT     | 4594   | P22033 | Methylmalonyl-coa mutase                                 | Enzyme                     | 147 | 0.534 | 0.731 | 0.00 | 0.01 |  | 1.00 | 1 | 0 | 2014 | 2014 |
| MVK      | 4598   | Q03426 | Mevalonate kinase                                        | Kinase                     | 139 | 0.576 | 0.731 | 0.17 | 0.01 |  | 1.00 | 1 | 2 | 2017 | 2017 |
| ATF3     | 467    | P18847 | Activating transcription factor 3                        | Transcription factor       | 228 | 0.494 | 0.885 | 0.09 | 0.01 |  | 1.00 | 1 | 0 | 2017 | 2017 |
| ATF4     | 468    | P18848 | Activating transcription factor 4                        |                            | 178 | 0.507 | 0.769 | 0.02 | 0.01 |  | 1.00 | 1 | 0 | 2020 | 2020 |
| NDUFC2   | 4718   | O95298 | NADH:ubiquinone oxidoreductase subunit C2                | Enzyme                     | 8   | 0.805 | 0.308 | 0.68 | 0.01 |  | 1.00 | 1 | 1 | 2016 | 2016 |
| NFKB1    | 4790   | P19838 | Nuclear factor κ B subunit 1                             | Transcription factor       | 551 | 0.396 | 0.923 | 1.00 | 0.01 |  | 1.00 | 1 | 0 | 2018 | 2018 |
| NM       | 4827   |        | Neutrophil migration                                     |                            | 250 | 0.473 | 0.808 |      | 0.01 |  | 1.00 | 1 | 0 | 2019 | 2019 |
| NNMT     | 4837   | P40261 | Nicotinamide N-methyltransferase                         | Enzyme                     | 103 | 0.559 | 0.654 | 0.00 | 0.01 |  | 1.00 | 1 | 0 | 2006 | 2006 |
| NPC1     | 4864   | O15118 | NPC intracellular cholesterol transporter 1              | Transporter                | 220 | 0.518 | 0.692 | 0.00 | 0.01 |  | 1.00 | 1 | 0 | 2019 | 2019 |
| NPPB     | 4879   | P16860 | Natriuretic peptide B                                    |                            | 193 | 0.513 | 0.808 | 0.00 | 0.01 |  | 1.00 | 1 | 0 | 2019 | 2019 |
| NTF4     | 4909   | P34130 | Neurotrophin 4                                           | Signaling                  | 46  | 0.644 | 0.692 | 0.01 | 0.01 |  | 1.00 | 1 | 0 | 2019 | 2019 |
| MIR422A  | 494334 |        | Microrna 422a                                            |                            | 38  | 0.653 | 0.538 |      | 0.01 |  | 1.00 | 1 | 0 | 2017 | 2017 |
| MIR424   | 494336 |        | Microrna 424                                             |                            | 131 | 0.535 | 0.769 |      | 0.01 |  | 1.00 | 1 | 0 | 2018 | 2018 |
| OATP1    | 4945   |        | Ornithine aminotransferase pseudogene 1                  |                            | 3   | 0.89  | 0.154 |      | 0.01 |  | 1.00 | 1 | 0 | 2019 | 2019 |
| OGG1     | 4968   | O15527 | 8-oxoguanine DNA glycosylase                             |                            | 313 | 0.453 | 0.808 | 0.00 | 0.01 |  | 1.00 | 1 | 0 | 2015 | 2015 |
| OPRK1    | 4986   | P41145 | Opioid receptor κ 1                                      | G-protein coupled receptor | 156 | 0.555 | 0.615 | 0.00 | 0.01 |  | 1.00 | 1 | 0 | 2019 | 2019 |
| OPRM1    | 4988   | P35372 | Opioid receptor μ 1                                      | G-protein coupled receptor | 370 | 0.457 | 0.808 | 0.00 | 0.01 |  | 1.00 | 1 | 0 | 2019 | 2019 |
| P2RX4    | 5025   | Q99571 | Purinergic receptor P2X 4                                | Ion channel                | 138 | 0.547 | 0.808 | 0.00 | 0.01 |  | 1.00 | 1 | 0 | 2017 | 2017 |
| P2RX7    | 5027   | Q99572 | Purinergic receptor P2X 7                                | Ion channel                | 337 | 0.45  | 0.808 | 0.00 | 0.01 |  | 1.00 | 1 | 1 | 2012 | 2012 |
| P2RY2    | 5029   | P41231 | Purinergic receptor P2Y2                                 | G-protein coupled receptor | 136 | 0.543 | 0.808 | 0.08 | 0.01 |  | 1.00 | 1 | 0 | 2019 | 2019 |
| DEFB104B | 503618 | Q8WTQ1 | Defensin β 104B                                          |                            | 42  | 0.638 | 0.692 | 0.33 | 0.01 |  | 1.00 | 1 | 0 | 2012 | 2012 |
| PAEP     | 5047   | P09466 | Progestagen associated endometrial protein               | Enzyme                     | 397 | 0.43  | 0.846 | 0.00 | 0.01 |  | 1.00 | 1 | 0 | 2019 | 2019 |
| NOX4     | 50507  | Q9NPH5 | NADPH oxidase 4                                          | Enzyme                     | 260 | 0.471 | 0.885 | 0.00 | 0.01 |  | 1.00 | 1 | 2 | 2017 | 2017 |
| SERPINB2 | 5055   | P05120 | Serpin family B member 2                                 | Enzyme modulator           | 183 | 0.502 | 0.808 | 0.00 | 0.01 |  | 0.00 | 1 | 0 | 2020 | 2020 |
| IL20     | 50604  | Q9NYY1 | Interleukin 20                                           |                            | 111 | 0.556 | 0.769 | 0.00 | 0.01 |  | 1.00 | 1 | 0 | 2009 | 2009 |
| PAPPA    | 5069   | Q13219 | Pappalysin 1                                             |                            | 125 | 0.558 | 0.692 | 0.16 | 0.01 |  | 1.00 | 1 | 1 | 2014 | 2014 |
| AK3      | 50808  | Q9UIJ7 | Adenylate kinase 3                                       | Kinase                     | 32  | 0.691 | 0.462 | 0.00 | 0.01 |  | 0.00 | 1 | 0 | 2017 | 2017 |
| PC       | 5091   | P11498 | Pyruvate carboxylase                                     | Enzyme                     | 183 | 0.515 | 0.808 | 0.01 | 0.01 |  | 1.00 | 1 | 0 | 2013 | 2013 |
| PDE11A   | 50940  | Q9HCR9 | Phosphodiesterase 11A                                    |                            | 86  | 0.612 | 0.654 | 0.00 | 0.01 |  | 1.00 | 1 | 0 | 2016 | 2016 |
| FOXP3    | 50943  | Q9BZS1 | Forkhead box P3                                          |                            | 688 | 0.368 | 0.846 | 0.99 | 0.01 |  | 1.00 | 1 | 0 | 2018 | 2018 |
| SERPINA5 | 5104   | P05154 | Serpin family A member 5                                 | Enzyme modulator           | 185 | 0.507 | 0.808 | 0.00 | 0.01 |  | 1.00 | 1 | 0 | 2018 | 2018 |
| GAL      | 51083  | P22466 | Galanin and GMAP prepropeptide                           |                            | 226 | 0.493 | 0.846 | 0.00 | 0.01 |  | 1.00 | 1 | 0 | 2017 | 2017 |
| MLXIPL   | 51085  | Q9NP71 | MLX interacting protein like                             |                            | 165 | 0.554 | 0.731 | 0.05 | 0.01 |  | 1.00 | 1 | 1 | 2010 | 2010 |
| RMDN1    | 51115  | Q96DB5 | Regulator of microtubule dynamics 1                      |                            | 123 | 0.546 | 0.769 | 0.00 | 0.01 |  | 1.00 | 1 | 0 | 2017 | 2017 |
| IRAK4    | 51135  | Q9NWZ3 | Interleukin 1 receptor associated kinase 4               | Kinase                     | 90  | 0.578 | 0.769 | 0.00 | 0.01 |  | 1.00 | 1 | 0 | 2018 | 2018 |
| PCSK1    | 5122   | P29120 | Proprotein convertase subtilisin/kexin type 1            | Enzyme                     | 140 | 0.548 | 0.615 | 0.00 | 0.01 |  | 1.00 | 1 | 0 | 2018 | 2018 |
| MZB1     | 51237  | Q8WU39 | Marginal zone B and B1 cell specific protein             |                            | 100 | 0.565 | 0.769 | 0.00 | 0.01 |  | 1.00 | 1 | 0 | 2018 | 2018 |
| TLR7     | 51284  | Q9NYK1 | Toll like receptor 7                                     |                            | 276 | 0.464 | 0.885 | 0.98 | 0.01 |  | 1.00 | 1 | 1 | 2016 | 2016 |
| TLR8     | 51311  | Q9NR97 | Toll like receptor 8                                     |                            | 122 | 0.543 | 0.769 | 0.32 | 0.01 |  | 1.00 | 1 | 1 | 2016 | 2016 |
| SPTBN5   | 51332  | Q9NRC6 | Spectrin β, non-erythrocytic 5                           |                            | 5   | 0.861 | 0.192 | 0.00 | 0.01 |  | 1.00 | 1 | 1 | 2010 | 2010 |
| MS4A4A   | 51338  | Q96IQ5 | Membrane spanning 4-domains A4A                          | Receptor                   | 21  | 0.722 | 0.308 | 0.00 | 0.01 |  | 1.00 | 1 | 0 | 2019 | 2019 |
| ZC3HC1   | 51530  | Q86WB0 | Zinc finger C3HC-type containing 1                       |                            | 23  | 0.76  | 0.308 | 0.00 | 0.01 |  | 1.00 | 1 | 1 | 2019 | 2019 |
| PDGFRB   | 5159   | P09619 | Platelet derived growth factor receptor β                | Kinase                     | 492 | 0.416 | 0.846 | 0.90 | 0.01 |  | 1.00 | 1 | 0 | 2019 | 2019 |
| PECAM1   | 5175   | P16284 | Platelet and endothelial cell adhesion molecule 1        | Cell adhesion              | 396 | 0.426 | 0.846 |      | 0.01 |  | 1.00 | 1 | 2 | 2009 | 2009 |
| RTEL1    | 51750  | Q9NZ71 | Regulator of telomere elongation helicase 1              | Enzyme                     | 321 | 0.459 | 0.808 | 0.00 | 0.01 |  | 1.00 | 1 | 0 | 2017 | 2017 |
| STK26    | 51765  | Q9P289 | Serine/threonine kinase 26                               | Kinase                     | 26  | 0.705 | 0.538 | 0.31 | 0.01 |  | 1.00 | 1 | 0 | 2020 | 2020 |
| ASIC5    | 51802  | Q9NY37 | Acid sensing ion channel subunit family member 5         | Ion channel                | 8   | 0.805 | 0.423 | 0.00 | 0.01 |  | 1.00 | 1 | 0 | 2011 | 2011 |
| SERPINE2 | 5270   | P07093 | Serpin family E member 2                                 | Enzyme modulator           | 87  | 0.592 | 0.692 | 0.73 | 0.01 |  | 1.00 | 1 | 0 | 2010 | 2010 |
| SERPINI1 | 5274   | Q99574 | Serpin family I member 1                                 | Enzyme modulator           | 58  | 0.631 | 0.462 | 0.03 | 0.01 |  | 1.00 | 1 | 0 | 2004 | 2004 |
| PIK3R1   | 5295   | P27986 | Phosphoinositide-3-kinase regulatory subunit 1           | Kinase                     | 285 | 0.477 | 0.885 | 1.00 | 0.01 |  | 1.00 | 1 | 0 | 2020 | 2020 |
| PITX2    | 5308   | Q99697 | Paired like homeodomain 2                                |                            | 248 | 0.489 | 0.808 | 0.98 | 0.01 |  | 1.00 | 1 | 0 | 2015 | 2015 |
| PKM      | 5315   | P14618 | Pyruvate kinase M1/2                                     | Kinase                     | 237 | 0.482 | 0.808 | 0.85 | 0.01 |  | 1.00 | 1 | 0 | 2020 | 2020 |
| PLIN1    | 5346   | O60240 | Perilipin 1                                              |                            | 85  | 0.59  | 0.654 | 0.00 | 0.01 |  | 1.00 | 1 | 0 | 2008 | 2008 |

|          |        |        |                                                                  |                            |      |       |       |      |      |  |      |   |   |      |      |
|----------|--------|--------|------------------------------------------------------------------|----------------------------|------|-------|-------|------|------|--|------|---|---|------|------|
| PLP1     | 5354   | P60201 | Proteolipid protein 1                                            | Cellular structure         | 160  | 0.543 | 0.769 | 0.93 | 0.01 |  | 1.00 | 1 | 0 | 2019 | 2019 |
| ACP5     | 54     | P13686 | Acid phosphatase 5, tartrate resistant                           |                            | 130  | 0.561 | 0.731 | 0.08 | 0.01 |  | 1.00 | 1 | 0 | 2019 | 2019 |
| PNN      | 5411   | Q9H307 | Pinin, desmosome associated protein                              |                            | 55   | 0.638 | 0.577 | 0.11 | 0.01 |  | 1.00 | 1 | 0 | 2019 | 2019 |
| NANS     | 54187  | Q9NR45 | N-acetylneuraminate synthase                                     | Enzyme                     | 153  | 0.545 | 0.692 |      | 0.01 |  | 1.00 | 1 | 0 | 2018 | 2018 |
| POR      | 5447   | P16435 | Cytochrome p450 oxidoreductase                                   |                            | 218  | 0.502 | 0.769 | 0.00 | 0.01 |  | 1.00 | 1 | 0 | 2019 | 2019 |
| POU2F1   | 5451   | P14859 | POU class 2 homeobox 1                                           |                            | 115  | 0.558 | 0.769 | 0.90 | 0.01 |  | 1.00 | 1 | 0 | 2019 | 2019 |
| TOMM7    | 54543  | Q9P0U1 | Translocase of outer mitochondrial membrane 7                    |                            | 6    | 1     | 0.077 | 0.01 | 0.01 |  | 1.00 | 1 | 0 | 2019 | 2019 |
| DLL4     | 54567  | Q9NR61 | $\Delta$ like canonical Notch ligand 4                           |                            | 219  | 0.494 | 0.769 | 1.00 | 0.01 |  | 1.00 | 1 | 0 | 2019 | 2019 |
| EGLN1    | 54583  | Q9GZT9 | Egl-9 family hypoxia inducible factor 1                          |                            | 130  | 0.54  | 0.731 | 0.97 | 0.01 |  | 1.00 | 1 | 0 | 2019 | 2019 |
| UGT1A1   | 54658  | P22309 | UDP glucuronosyltransferase family 1 member A1                   |                            | 302  | 0.464 | 0.769 | 0.00 | 0.01 |  | 1.00 | 1 | 0 | 2010 | 2010 |
| PPBP     | 5473   | P02775 | Pro-platelet basic protein                                       | Signaling                  | 111  | 0.544 | 0.808 | 0.06 | 0.01 |  | 1.00 | 1 | 0 | 2017 | 2017 |
| ROPN1    | 54763  | Q9HAT0 | Rhopilin associated tail protein 1                               |                            | 5    | 0.89  | 0.115 | 0.00 | 0.01 |  | 1.00 | 1 | 1 | 2010 | 2010 |
| PPIA     | 5478   | P62937 | Peptidylprolyl isomerase A                                       |                            | 180  | 0.51  | 0.769 | 0.56 | 0.01 |  | 1.00 | 1 | 0 | 2018 | 2018 |
| TRPM7    | 54822  | Q96QT4 | Transient receptor potential cation channel subfamily M member 7 | Ion channel                | 151  | 0.531 | 0.731 | 0.00 | 0.01 |  | 1.00 | 1 | 0 | 2009 | 2009 |
| RASIP1   | 54922  | Q5U651 | Ras interacting protein 1                                        |                            | 20   | 0.78  | 0.346 | 1.00 | 0.01 |  | 1.00 | 1 | 0 | 2014 | 2014 |
| TMEM132A | 54972  | Q24JP5 | Transmembrane protein 132A                                       |                            | 15   | 0.792 | 0.308 | 0.00 | 0.01 |  | 1.00 | 1 | 0 | 2018 | 2018 |
| ANO1     | 55107  | Q5XXA6 | Anoctamin 1                                                      | Ion channel                | 175  | 0.516 | 0.769 | 0.87 | 0.01 |  | 1.00 | 1 | 0 | 2019 | 2019 |
| RMDN3    | 55177  | Q96TC7 | Regulator of microtubule dynamics 3                              |                            | 134  | 0.534 | 0.769 | 0.00 | 0.01 |  | 1.00 | 1 | 0 | 2017 | 2017 |
| IMPACT   | 55364  | Q9P2X3 | Impact RWD domain protein                                        |                            | 85   | 0.593 | 0.808 | 0.00 | 0.01 |  | 1.00 | 1 | 0 | 2019 | 2019 |
| MIR449A  | 554213 |        | Microma 449a                                                     |                            | 89   | 0.57  | 0.731 |      | 0.01 |  | 1.00 | 1 | 0 | 2019 | 2019 |
| PRH1     | 5554   | P02810 | Proline rich protein haeiii subfamily 1                          |                            | 41   | 0.659 | 0.5   | 0.01 | 0.01 |  | 1.00 | 1 | 0 | 2018 | 2018 |
| PRH2     | 5555   | P02810 | Proline rich protein haeiii subfamily 2                          |                            | 38   | 0.663 | 0.5   | 0.01 | 0.01 |  | 1.00 | 1 | 0 | 2018 | 2018 |
| KIF16B   | 55614  | Q96L93 | Kinesin family member 16B                                        | Cellular structure         | 15   | 0.792 | 0.423 | 0.00 | 0.01 |  | 1.00 | 1 | 0 | 2009 | 2009 |
| SYBU     | 55638  | Q9NX95 | Syntabulin                                                       | Transporter                | 120  | 0.546 | 0.769 | 0.00 | 0.01 |  | 1.00 | 1 | 0 | 2017 | 2017 |
| PRKAR1A  | 5573   | P10644 | Protein kinase camp-dependent type I regulatory subunit $\alpha$ |                            | 597  | 0.401 | 0.846 | 1.00 | 0.01 |  | 1.00 | 1 | 0 | 2015 | 2015 |
| VPS35    | 55737  | Q96QK1 | VPS35 retromer complex component                                 | Transporter                | 66   | 0.656 | 0.5   | 0.97 | 0.01 |  | 1.00 | 1 | 0 | 2019 | 2019 |
| PRKCA    | 5578   | P17252 | Protein kinase C $\alpha$                                        | Kinase                     | 368  | 0.44  | 0.846 | 0.37 | 0.01 |  | 1.00 | 1 | 0 | 2019 | 2019 |
| PRKCD    | 5580   | Q05655 | Protein kinase C $\delta$                                        | Kinase                     | 287  | 0.48  | 0.846 | 1.00 | 0.01 |  | 1.00 | 1 | 0 | 2017 | 2017 |
| RNF130   | 55819  | Q86XS8 | Ring finger protein 130                                          |                            | 13   | 0.839 | 0.192 | 0.00 | 0.01 |  | 1.00 | 1 | 0 | 2018 | 2018 |
| PRKD1    | 5587   | Q15139 | Protein kinase D1                                                | Kinase                     | 171  | 0.531 | 0.846 | 0.00 | 0.01 |  | 1.00 | 1 | 0 | 2020 | 2020 |
| ACSS2    | 55902  | Q9NR19 | Acyl-coa synthetase short chain family member 2                  | Enzyme                     | 188  | 0.506 | 0.808 | 0.00 | 0.01 |  | 1.00 | 1 | 0 | 2018 | 2018 |
| APOM     | 55937  | O95445 | Apolipoprotein M                                                 |                            | 82   | 0.59  | 0.769 | 0.00 | 0.01 |  | 1.00 | 1 | 0 | 2011 | 2011 |
| LRRC8A   | 56262  | Q8IWT6 | Leucine rich repeat containing 8 VRAC subunit A                  |                            | 64   | 0.644 | 0.692 | 0.94 | 0.01 |  | 1.00 | 1 | 0 | 2019 | 2019 |
| MASP1    | 5648   | P48740 | Mannan binding lectin serine peptidase 1                         | Enzyme                     | 123  | 0.565 | 0.885 | 0.00 | 0.01 |  | 1.00 | 1 | 0 | 2018 | 2018 |
| MMP26    | 56547  | Q9NRE1 | Matrix metallopeptidase 26                                       | Enzyme                     | 58   | 0.65  | 0.615 | 0.00 | 0.01 |  | 1.00 | 1 | 0 | 2019 | 2019 |
| B2M      | 567    | P61769 | B-2-microglobulin                                                | Immune response            | 352  | 0.447 | 0.846 | 0.56 | 0.01 |  | 1.00 | 1 | 0 | 2019 | 2019 |
| SPHK2    | 56848  | Q9NRA0 | Sphingosine kinase 2                                             | Kinase                     | 140  | 0.546 | 0.731 | 0.00 | 0.01 |  | 1.00 | 1 | 0 | 2017 | 2017 |
| ANKS1B   | 56899  | Q7Z6G8 | Ankyrin repeat and sterile $\alpha$ motif domain containing 1B   | Receptor                   | 43   | 0.686 | 0.423 | 1.00 | 0.01 |  | 1.00 | 1 | 0 | 2017 | 2017 |
| PSMB9    | 5698   | P28065 | Proteasome 20S subunit $\beta$ 9                                 |                            | 167  | 0.514 | 0.808 | 0.00 | 0.01 |  | 1.00 | 1 | 0 | 2018 | 2018 |
| PDXP     | 57026  | Q96GD0 | Pyridoxal phosphatase                                            | Enzyme                     | 149  | 0.533 | 0.731 | 0.26 | 0.01 |  | 1.00 | 1 | 0 | 2019 | 2019 |
| RTN4     | 57142  | Q9NQC3 | Reticulon 4                                                      |                            | 71   | 0.621 | 0.692 | 0.45 | 0.01 |  | 1.00 | 1 | 0 | 2011 | 2011 |
| PTGDR    | 5729   | Q13258 | Prostaglandin D2 receptor                                        | G-protein coupled receptor | 45   | 0.65  | 0.615 | 0.00 | 0.01 |  | 1.00 | 1 | 0 | 2019 | 2019 |
| PTGER2   | 5732   | P43116 | Prostaglandin E receptor 2                                       | G-protein coupled receptor | 79   | 0.597 | 0.731 | 0.01 | 0.01 |  | 1.00 | 1 | 0 | 2006 | 2006 |
| MRS2     | 57380  | Q9HD23 | Magnesium transporter MRS2                                       |                            | 11   | 0.792 | 0.269 | 0.00 | 0.01 |  | 0.00 | 1 | 0 | 2019 | 2019 |
| PTGIR    | 5739   | P43119 | Prostaglandin I2 receptor                                        | G-protein coupled receptor | 27   | 0.711 | 0.423 | 0.00 | 0.01 |  | 1.00 | 1 | 0 | 2013 | 2013 |
| MIR363   | 574031 |        | Microma 363                                                      |                            | 83   | 0.578 | 0.692 |      | 0.01 |  | 1.00 | 1 | 0 | 2017 | 2017 |
| PTH LH   | 5744   | P12272 | Parathyroid hormone like hormone                                 |                            | 321  | 0.453 | 0.846 | 0.81 | 0.01 |  | 1.00 | 1 | 0 | 2019 | 2019 |
| MIR451A  | 574411 |        | Microma 451a                                                     |                            | 177  | 0.505 | 0.769 |      | 0.01 |  | 1.00 | 1 | 0 | 2019 | 2019 |
| MIR410   | 574434 |        | Microma 410                                                      |                            | 87   | 0.575 | 0.692 |      | 0.01 |  | 1.00 | 1 | 0 | 2018 | 2018 |
| MIR497   | 574456 |        | Microma 497                                                      |                            | 116  | 0.539 | 0.808 |      | 0.01 |  | 1.00 | 1 | 0 | 2019 | 2019 |
| NDRG3    | 57446  | Q9UGV2 | NDRG family member 3                                             | Enzyme                     | 24   | 0.722 | 0.308 | 0.37 | 0.01 |  | 1.00 | 1 | 0 | 2017 | 2017 |
| NDRG2    | 57447  | Q9UN36 | NDRG family member 2                                             | Enzyme                     | 156  | 0.518 | 0.692 | 0.00 | 0.01 |  | 1.00 | 1 | 0 | 2018 | 2018 |
| MIR503   | 574506 |        | Microma 503                                                      |                            | 111  | 0.551 | 0.808 |      | 0.01 |  | 1.00 | 1 | 0 | 2019 | 2019 |
| NLN      | 57486  | Q9BYT8 | Neurolysin                                                       | Enzyme                     | 74   | 0.597 | 0.731 | 0.00 | 0.01 |  | 1.00 | 1 | 0 | 2020 | 2020 |
| TAOK1    | 57551  | Q7L7X3 | TAO kinase 1                                                     | Kinase                     | 19   | 0.792 | 0.269 | 1.00 | 0.01 |  | 1.00 | 1 | 0 | 2019 | 2019 |
| SEMA6A   | 57556  | Q9H2E6 | Semaphorin 6A                                                    | Signaling                  | 211  | 0.486 | 0.808 | 1.00 | 0.01 |  | 1.00 | 1 | 0 | 2020 | 2020 |
| PTMA     | 5757   | P06454 | Prothymosin $\alpha$                                             |                            | 71   | 0.604 | 0.731 | 0.03 | 0.01 |  | 1.00 | 1 | 0 | 2017 | 2017 |
| PTMAP4   | 5761   |        | Prothymosin $\alpha$ pseudogene 4                                |                            | 49   | 0.638 | 0.731 |      | 0.01 |  | 1.00 | 1 | 0 | 2017 | 2017 |
| RNF213   | 57674  | Q63HN8 | Ring finger protein 213                                          |                            | 59   | 0.628 | 0.538 | 0.00 | 0.01 |  | 1.00 | 1 | 1 | 2019 | 2019 |
| PRX      | 57716  | Q9BXM0 | Periaxin                                                         |                            | 75   | 0.65  | 0.577 | 0.00 | 0.01 |  | 1.00 | 1 | 0 | 2018 | 2018 |
| HAMP     | 57817  | P81172 | Hepcidin antimicrobial peptide                                   |                            | 377  | 0.433 | 0.846 | 0.01 | 0.01 |  | 1.00 | 1 | 0 | 2018 | 2018 |
| BARD1    | 580    | Q99728 | BRCA1 associated RING domain 1                                   |                            | 75   | 0.597 | 0.538 | 0.00 | 0.01 |  | 1.00 | 1 | 0 | 2001 | 2001 |
| NLRC4    | 58484  | Q9NPP4 | NLR family CARD domain containing 4                              |                            | 145  | 0.556 | 0.769 | 0.00 | 0.01 |  | 1.00 | 1 | 0 | 2019 | 2019 |
| IL21     | 59067  | Q9HBE4 | Interleukin 21                                                   |                            | 321  | 0.441 | 0.769 | 0.63 | 0.01 |  | 1.00 | 1 | 1 | 2014 | 2014 |
| RAPSN    | 5913   | Q13702 | Receptor associated protein of the synapse                       |                            | 121  | 0.593 | 0.731 | 0.00 | 0.01 |  | 1.00 | 1 | 0 | 2014 | 2014 |
| RARRES2  | 5919   | Q99969 | Retinoic acid receptor responder 2                               |                            | 180  | 0.519 | 0.731 | 0.00 | 0.01 |  | 1.00 | 1 | 0 | 2020 | 2020 |
| TRPV4    | 59341  | Q9HBA0 | Transient receptor potential cation channel subfamily V member 4 | Ion channel                | 422  | 0.457 | 0.808 | 0.00 | 0.01 |  | 1.00 | 1 | 0 | 2018 | 2018 |
| RENBP    | 5973   | P51606 | Renin binding protein                                            | Enzyme                     | 156  | 0.528 | 0.769 | 0.45 | 0.01 |  | 1.00 | 1 | 0 | 2008 | 2008 |
| ACTB     | 60     | P60709 | Actin $\beta$                                                    | Cellular structure         | 1110 | 0.325 | 0.923 | 0.99 | 0.01 |  | 1.00 | 1 | 1 | 2020 | 2020 |
| RGS7     | 6000   | P49802 | Regulator of G protein signaling 7                               |                            | 28   | 0.722 | 0.462 | 0.78 | 0.01 |  | 1.00 | 1 | 0 | 2017 | 2017 |
| RNASE3   | 6037   | P12724 | Ribonuclease A family member 3                                   |                            | 207  | 0.49  | 0.808 |      | 0.01 |  | 1.00 | 1 | 0 | 2017 | 2017 |
| PROK2    | 60675  | Q9HC23 | Prokineticin 2                                                   | Signaling                  | 151  | 0.555 | 0.769 | 0.01 | 0.01 |  | 1.00 | 1 | 0 | 2018 | 2018 |
| RPS20    | 6224   | P60866 | Ribosomal protein S20                                            | Nucleic acid binding       | 86   | 0.61  | 0.692 | 0.02 | 0.01 |  | 0.00 | 1 | 0 | 2006 | 2006 |

|          |        |        |                                                                 |                            |     |       |       |      |      |  |      |   |   |      |      |
|----------|--------|--------|-----------------------------------------------------------------|----------------------------|-----|-------|-------|------|------|--|------|---|---|------|------|
| RTN1     | 6252   | Q16799 | Reticulon 1                                                     |                            | 44  | 0.666 | 0.615 | 0.99 | 0.01 |  | 1.00 | 1 | 0 | 2011 | 2011 |
| SORT1    | 6272   | Q99523 | Sortilin 1                                                      | Transporter                | 111 | 0.573 | 0.615 | 1.00 | 0.01 |  | 1.00 | 1 | 1 | 2015 | 2015 |
| S100A9   | 6280   | P06702 | S100 calcium binding protein A9                                 | Calcium-binding protein    | 363 | 0.433 | 0.885 | 0.48 | 0.01 |  | 1.00 | 1 | 0 | 2018 | 2018 |
| S100A11  | 6282   | P31949 | S100 calcium binding protein A11                                | Calcium-binding protein    | 103 | 0.556 | 0.731 | 0.01 | 0.01 |  | 1.00 | 1 | 0 | 2018 | 2018 |
| SAA1     | 6288   | P0DJH8 | Serum amyloid A1                                                | Transporter                | 188 | 0.513 | 0.808 | 0.01 | 0.01 |  | 1.00 | 1 | 0 | 2017 | 2017 |
| SAA2     | 6289   | P0DJH9 | Serum amyloid A2                                                | Transporter                | 103 | 0.568 | 0.731 | 0.00 | 0.01 |  | 1.00 | 1 | 1 | 2017 | 2017 |
| TSPAN31  | 6302   | Q12999 | Tetraspanin 31                                                  |                            | 112 | 0.556 | 0.654 | 0.22 | 0.01 |  | 1.00 | 1 | 0 | 2018 | 2018 |
| CEACAM1  | 634    | P13688 | CEA cell adhesion molecule 1                                    |                            | 167 | 0.525 | 0.731 | 0.00 | 0.01 |  | 1.00 | 1 | 0 | 2013 | 2013 |
| BHMT     | 635    | Q93088 | Bine--homocysteine S-methyltransferase                          |                            | 71  | 0.595 | 0.731 | 0.00 | 0.01 |  | 1.00 | 1 | 0 | 2010 | 2010 |
| CCL5     | 6352   | P13501 | C-C motif chemokine ligand 5                                    | Signaling                  | 514 | 0.403 | 0.885 | 0.00 | 0.01 |  | 1.00 | 1 | 1 | 2013 | 2013 |
| CCL19    | 6363   | Q99731 | C-C motif chemokine ligand 19                                   | Signaling                  | 126 | 0.542 | 0.692 | 0.32 | 0.01 |  | 1.00 | 1 | 0 | 2017 | 2017 |
| CCL23    | 6368   | P55773 | C-C motif chemokine ligand 23                                   | Signaling                  | 18  | 0.76  | 0.346 | 0.00 | 0.01 |  | 1.00 | 1 | 0 | 2018 | 2018 |
| CX3CL1   | 6376   | P78423 | C-X3-C motif chemokine ligand 1                                 | Signaling                  | 243 | 0.478 | 0.808 | 0.61 | 0.01 |  | 1.00 | 1 | 0 | 2019 | 2019 |
| SDC1     | 6382   | P18827 | Syndecan 1                                                      | Extracellular structure    | 323 | 0.445 | 0.769 | 0.01 | 0.01 |  | 1.00 | 1 | 0 | 2018 | 2018 |
| SRR      | 63826  | Q9GZT4 | Serine racemase                                                 | Enzyme                     | 58  | 0.617 | 0.692 | 0.01 | 0.01 |  | 1.00 | 1 | 0 | 2019 | 2019 |
| NEUROG2  | 63973  | Q9H2A3 | Neurogenin 2                                                    | Enzyme                     | 20  | 0.716 | 0.5   | 0.81 | 0.01 |  | 1.00 | 1 | 0 | 2018 | 2018 |
| SELL     | 6402   | P14151 | Selectin L                                                      |                            | 171 | 0.505 | 0.846 | 0.00 | 0.01 |  | 1.00 | 1 | 1 | 2011 | 2011 |
| CRLF2    | 64109  | Q9HC73 | Cytokine receptor like factor 2                                 | Signaling                  | 61  | 0.615 | 0.538 | 0.00 | 0.01 |  | 1.00 | 1 | 0 | 2018 | 2018 |
| MOAP1    | 64112  | Q96BY2 | Modulator of apoptosis 1                                        |                            | 24  | 0.7   | 0.577 | 0.00 | 0.01 |  | 1.00 | 1 | 0 | 2019 | 2019 |
| POTEM    | 641455 | A6NI47 | POTE ankyrin domain family member M                             |                            | 133 | 0.541 | 0.769 | 0.00 | 0.01 |  | 1.00 | 1 | 0 | 2010 | 2010 |
| MAP2K4   | 6416   | P45985 | Mitogen-activated protein kinase kinase 4                       | Kinase                     | 100 | 0.559 | 0.692 | 1.00 | 0.01 |  | 1.00 | 1 | 1 | 2016 | 2016 |
| SNHG6    | 641638 |        | Small nucleolar RNA host gene 6                                 |                            | 51  | 0.633 | 0.423 |      | 0.01 |  | 1.00 | 1 | 0 | 2019 | 2019 |
| ABCG8    | 64241  | Q9H221 | ATP binding cassette subfamily G member 8                       | Transporter                | 116 | 0.573 | 0.538 | 0.00 | 0.01 |  | 1.00 | 1 | 1 | 2010 | 2010 |
| ITSN1    | 6453   | Q15811 | Intersectin 1                                                   | Enzyme modulator           | 51  | 0.656 | 0.577 | 1.00 | 0.01 |  | 1.00 | 1 | 0 | 2020 | 2020 |
| SHC1     | 6464   | P29353 | SHC adaptor protein 1                                           | Signaling                  | 80  | 0.597 | 0.538 | 0.00 | 0.01 |  | 1.00 | 1 | 0 | 2015 | 2015 |
| GORASP1  | 64689  | Q9BQQ3 | Golgi reassembly stacking protein 1                             |                            | 369 | 0.428 | 0.846 | 0.02 | 0.01 |  | 1.00 | 1 | 0 | 2019 | 2019 |
| SHH      | 6469   | Q15465 | Sonic hedgehog signaling molecule                               |                            | 303 | 0.461 | 0.846 | 0.98 | 0.01 |  | 1.00 | 1 | 0 | 2017 | 2017 |
| SHMT1    | 6470   | P34896 | Serine hydroxymethyltransferase 1                               | Enzyme                     | 106 | 0.566 | 0.654 | 0.00 | 0.01 |  | 1.00 | 1 | 0 | 2011 | 2011 |
| SMURF2   | 64750  | Q9HAU4 | SMAD specific E3 ubiquitin protein ligase 2                     | Enzyme                     | 59  | 0.623 | 0.615 | 0.87 | 0.01 |  | 1.00 | 1 | 0 | 2013 | 2013 |
| NMNAT1   | 64802  | Q9HAN9 | Nicotinamide nucleotide adenyllyltransferase 1                  | Enzyme                     | 57  | 0.656 | 0.269 | 0.04 | 0.01 |  | 1.00 | 1 | 0 | 2019 | 2019 |
| MARCHF7  | 64844  | Q9H992 | Membrane associated ring-CH-type finger 7                       |                            | 30  | 0.705 | 0.462 | 0.66 | 0.01 |  | 1.00 | 1 | 0 | 2017 | 2017 |
| AGXT2    | 64902  | Q9BYV1 | Alanine--glyoxylate aminotransferase 2                          |                            | 25  | 0.729 | 0.385 | 0.00 | 0.01 |  | 1.00 | 1 | 1 | 2016 | 2016 |
| PINK1    | 65018  | Q9BXM7 | PTEN induced kinase 1                                           | Kinase                     | 209 | 0.516 | 0.769 | 0.00 | 0.01 |  | 1.00 | 1 | 0 | 2013 | 2013 |
| ACD      | 65057  | Q96AP0 | ACD shelterin complex subunit and telomerase recruitment factor |                            | 96  | 0.603 | 0.731 | 0.00 | 0.01 |  | 1.00 | 1 | 0 | 2011 | 2011 |
| NBEAL1   | 65065  | Q6ZS30 | Neurobeachin like 1                                             |                            | 60  | 0.638 | 0.692 | 0.00 | 0.01 |  | 0.00 | 1 | 0 | 2017 | 2017 |
| MARCKSL1 | 65108  | P49006 | MARCKS like 1                                                   |                            | 169 | 0.508 | 0.731 | 0.01 | 0.01 |  | 1.00 | 1 | 0 | 2019 | 2019 |
| WNK1     | 65125  | Q9H4A3 | WNK lysine deficient protein kinase 1                           | Kinase                     | 460 | 0.416 | 0.846 | 1.00 | 0.01 |  | 1.00 | 1 | 0 | 2019 | 2019 |
| WNK3     | 65267  | Q9BYP7 | WNK lysine deficient protein kinase 3                           | Kinase                     | 13  | 0.751 | 0.346 | 1.00 | 0.01 |  | 1.00 | 1 | 0 | 2017 | 2017 |
| SLC6A4   | 6532   | P31645 | Solute carrier family 6 member 4                                | Transporter                | 440 | 0.429 | 0.808 | 0.25 | 0.01 |  | 1.00 | 1 | 0 | 2019 | 2019 |
| SLC6A11  | 6538   | P48066 | Solute carrier family 6 member 11                               | Transporter                | 21  | 0.716 | 0.462 | 0.00 | 0.01 |  | 1.00 | 1 | 0 | 2019 | 2019 |
| SLC6A13  | 6540   | Q9NSD5 | Solute carrier family 6 member 13                               | Transporter                | 21  | 0.736 | 0.346 | 0.00 | 0.01 |  | 1.00 | 1 | 0 | 2019 | 2019 |
| SLC12A3  | 6559   | P55017 | Solute carrier family 12 member 3                               | Transporter                | 252 | 0.493 | 0.808 | 0.00 | 0.01 |  | 1.00 | 1 | 0 | 2019 | 2019 |
| SLC19A1  | 6573   | P41440 | Solute carrier family 19 member 1                               | Transporter                | 155 | 0.523 | 0.692 | 0.00 | 0.01 |  | 1.00 | 1 | 2 | 2015 | 2015 |
| SLC20A2  | 6575   | Q08357 | Solute carrier family 20 member 2                               | Transporter                | 104 | 0.638 | 0.577 | 0.97 | 0.01 |  | 1.00 | 1 | 0 | 2018 | 2018 |
| SLC01A2  | 6579   | P46721 | Solute carrier organic anion transporter family member 1A2      | Transporter                | 44  | 0.656 | 0.577 | 0.00 | 0.01 |  | 1.00 | 1 | 0 | 2019 | 2019 |
| CYP4F12  | 66002  | Q9HCS2 | Cytochrome P450 family 4 subfamily F member 12                  | Enzyme                     | 7   | 0.89  | 0.154 | 0.00 | 0.01 |  | 1.00 | 1 | 1 | 2017 | 2017 |
| SMN1     | 6606   | Q16637 | Survival of motor neuron 1, telomeric                           | Epigenetic regulator       | 317 | 0.454 | 0.769 | 0.02 | 0.01 |  | 0.00 | 1 | 0 | 2001 | 2001 |
| SMN2     | 6607   | Q16637 | Survival of motor neuron 2, centromeric                         |                            | 299 | 0.459 | 0.769 | 0.10 | 0.01 |  | 0.00 | 1 | 0 | 2001 | 2001 |
| SNCA     | 6622   | P37840 | Synuclein $\alpha$                                              | Transporter                | 449 | 0.427 | 0.885 | 0.88 | 0.01 |  | 1.00 | 1 | 0 | 2020 | 2020 |
| SNRNP70  | 6625   | P08621 | Small nuclear ribonucleoprotein U1 subunit 70                   | Nucleic acid binding       | 67  | 0.595 | 0.692 | 1.00 | 0.01 |  | 1.00 | 1 | 0 | 2019 | 2019 |
| MIR544A  | 664613 |        | Microma 544a                                                    |                            | 28  | 0.695 | 0.423 |      | 0.01 |  | 1.00 | 1 | 0 | 2018 | 2018 |
| MIR487B  | 664616 |        | Microma 487b                                                    |                            | 35  | 0.67  | 0.423 |      | 0.01 |  | 1.00 | 1 | 0 | 2015 | 2015 |
| SOD2     | 6648   | P04179 | Superoxide dismutase 2                                          | Enzyme                     | 668 | 0.379 | 0.923 | 0.15 | 0.01 |  | 1.00 | 1 | 1 | 2017 | 2017 |
| SOD3     | 6649   | P08294 | Superoxide dismutase 3                                          | Enzyme                     | 138 | 0.531 | 0.808 | 0.00 | 0.01 |  | 1.00 | 1 | 0 | 2019 | 2019 |
| BNIP3L   | 665    | O60238 | BCL2 interacting protein 3 like                                 |                            | 63  | 0.636 | 0.654 | 0.15 | 0.01 |  | 1.00 | 1 | 0 | 2017 | 2017 |
| SOX2     | 6657   | P48431 | SRY-box transcription factor 2                                  | Transcription factor       | 503 | 0.405 | 0.808 | 0.71 | 0.01 |  | 1.00 | 1 | 0 | 2018 | 2018 |
| SREBF2   | 6721   | Q12772 | Sterol regulatory element binding transcription factor 2        |                            | 112 | 0.566 | 0.577 | 0.21 | 0.01 |  | 1.00 | 1 | 1 | 2012 | 2012 |
| SRF      | 6722   | P11831 | Serum response factor                                           | Transcription factor       | 147 | 0.534 | 0.808 | 0.98 | 0.01 |  | 1.00 | 1 | 0 | 2014 | 2014 |
| BRCA2    | 675    | P51587 | BRCA2 DNA repair associated                                     | Nucleic acid binding       | 656 | 0.379 | 0.846 | 0.00 | 0.01 |  | 1.00 | 1 | 1 | 2017 | 2017 |
| SSTR4    | 6754   | P31391 | Somatostatin receptor 4                                         | G-protein coupled receptor | 273 | 0.469 | 0.846 | 0.00 | 0.01 |  | 1.00 | 1 | 0 | 2015 | 2015 |
| STAR     | 6770   | P49675 | Steroidogenic acute regulatory protein                          |                            | 177 | 0.513 | 0.808 | 0.00 | 0.01 |  | 1.00 | 1 | 0 | 2017 | 2017 |
| STAT4    | 6775   | Q14765 | Signal transducer and activator of transcription 4              | Nucleic acid binding       | 316 | 0.471 | 0.769 | 0.77 | 0.01 |  | 1.00 | 1 | 0 | 2020 | 2020 |
| STAT5A   | 6776   | P42229 | Signal transducer and activator of transcription 5A             | Nucleic acid binding       | 318 | 0.445 | 0.808 | 1.00 | 0.01 |  | 1.00 | 1 | 0 | 2019 | 2019 |
| STAT5B   | 6777   | P51692 | Signal transducer and activator of transcription 5B             | Nucleic acid binding       | 357 | 0.442 | 0.808 | 1.00 | 0.01 |  | 1.00 | 1 | 0 | 2019 | 2019 |
| SCARNA6  | 677772 |        | Small Cajal body-specific RNA 6                                 |                            | 2   | 1     | 0.077 |      | 0.01 |  | 1.00 | 1 | 0 | 2019 | 2019 |
| STIM1    | 6786   | Q13586 | Stromal interaction molecule 1                                  |                            | 247 | 0.501 | 0.808 | 0.78 | 0.01 |  | 1.00 | 1 | 0 | 2017 | 2017 |
| BRS3     | 680    | P32247 | Bombesin receptor subtype 3                                     | G-protein coupled receptor | 261 | 0.474 | 0.846 |      | 0.01 |  | 1.00 | 1 | 0 | 2015 | 2015 |
| ABCC8    | 6833   | Q09428 | ATP binding cassette subfamily C member 8                       | Transporter                | 317 | 0.474 | 0.846 | 0.00 | 0.01 |  | 1.00 | 1 | 0 | 2007 | 2007 |
| SYT1     | 6857   | P21579 | Synaptotagmin 1                                                 | Transporter                | 460 | 0.412 | 0.846 | 0.60 | 0.01 |  | 1.00 | 1 | 0 | 2019 | 2019 |
| TAC1     | 6863   | P20366 | Tachykinin precursor 1                                          |                            | 478 | 0.424 | 0.923 | 0.75 | 0.01 |  | 1.00 | 1 | 0 | 2017 | 2017 |
| ADAM17   | 6868   | P78536 | ADAM metallopeptidase domain 17                                 |                            | 316 | 0.453 | 0.808 | 1.00 | 0.01 |  | 0.00 | 1 | 2 | 2014 | 2014 |
| BTF3P11  | 690    |        | Basic transcription factor 3 pseudogene 11                      |                            | 154 | 0.519 | 0.731 |      | 0.01 |  | 1.00 | 1 | 0 | 2016 | 2016 |
| MIR532   | 693124 |        | Microma 532                                                     |                            | 52  | 0.628 | 0.615 |      | 0.01 |  | 1.00 | 1 | 0 | 2015 | 2015 |

|             |        |                      |                                                                  |                         |     |       |       |      |      |  |      |   |   |      |      |
|-------------|--------|----------------------|------------------------------------------------------------------|-------------------------|-----|-------|-------|------|------|--|------|---|---|------|------|
| MIR605      | 693190 |                      | Microrna 605                                                     |                         | 43  | 0.644 | 0.423 |      | 0.01 |  | 1.00 | 1 | 1 | 2017 | 2017 |
| MIR608      | 693193 |                      | Microrna 608                                                     |                         | 55  | 0.615 | 0.538 |      | 0.01 |  | 1.00 | 1 | 1 | 2019 | 2019 |
| MIR618      | 693203 |                      | Microrna 618                                                     |                         | 35  | 0.67  | 0.5   |      | 0.01 |  | 1.00 | 1 | 1 | 2017 | 2017 |
| MIR638      | 693223 |                      | Microrna 638                                                     |                         | 48  | 0.636 | 0.462 |      | 0.01 |  | 1.00 | 1 | 0 | 2018 | 2018 |
| ZEB1        | 6935   | P37275               | Zinc finger E-box binding homeobox 1                             | Transcription factor    | 310 | 0.442 | 0.808 | 0.97 | 0.01 |  | 1.00 | 1 | 0 | 2018 | 2018 |
| TCN2        | 6948   | P20062               | Transcobalamin 2                                                 |                         | 104 | 0.578 | 0.615 | 0.00 | 0.01 |  | 1.00 | 1 | 0 | 2011 | 2011 |
| TEK         | 7010   | Q02763               | TEK receptor tyrosine kinase                                     | Kinase                  | 300 | 0.462 | 0.692 | 1.00 | 0.01 |  | 1.00 | 1 | 0 | 2020 | 2020 |
| TERC        | 7012   |                      | Telomerase RNA component                                         |                         | 296 | 0.471 | 0.846 |      | 0.01 |  | 1.00 | 1 | 0 | 2017 | 2017 |
| TERT        | 7015   | O14746               | Telomerase reverse transcriptase                                 | Enzyme                  | 703 | 0.374 | 0.846 | 0.99 | 0.01 |  | 1.00 | 1 | 2 | 2017 | 2017 |
| TFDP1       | 7027   | Q14186               | Transcription factor Dp-1                                        | Nucleic acid binding    | 56  | 0.623 | 0.692 | 0.97 | 0.01 |  | 1.00 | 1 | 0 | 2019 | 2019 |
| TFPI        | 7035   | P10646               | Tissue factor pathway inhibitor                                  | Enzyme modulator        | 230 | 0.486 | 0.808 | 0.25 | 0.01 |  | 0.00 | 1 | 0 | 2007 | 2007 |
| TGM2        | 7052   | P21980               | Transglutaminase 2                                               | Enzyme                  | 315 | 0.445 | 0.808 | 0.00 | 0.01 |  | 1.00 | 1 | 0 | 2019 | 2019 |
| THBS1       | 7057   | P07996               | Thrombospondin 1                                                 |                         | 480 | 0.407 | 0.885 | 1.00 | 0.01 |  | 1.00 | 1 | 0 | 2015 | 2015 |
| TIMP1       | 7076   | P01033               | TIMP metallopeptidase inhibitor 1                                | Enzyme modulator        | 603 | 0.38  | 0.885 | 0.50 | 0.01 |  | 1.00 | 1 | 0 | 2018 | 2018 |
| TLR3        | 7098   | O15455               | Toll like receptor 3                                             | Receptor                | 393 | 0.427 | 0.885 | 0.00 | 0.01 |  | 1.00 | 1 | 0 | 2011 | 2011 |
| ACTG1       | 71     | P63261               | Actin $\gamma$ 1                                                 | Cellular structure      | 291 | 0.477 | 0.846 | 0.00 | 0.01 |  | 1.00 | 1 | 0 | 2010 | 2010 |
| SERPING1    | 710    | P05155               | Serpin family G member 1                                         | Enzyme modulator        | 207 | 0.507 | 0.769 | 0.96 | 0.01 |  | 1.00 | 1 | 0 | 2018 | 2018 |
| TLR5        | 7100   | O60602               | Toll like receptor 5                                             |                         | 163 | 0.518 | 0.885 | 0.00 | 0.01 |  | 1.00 | 1 | 1 | 2016 | 2016 |
| TM7SF2      | 7108   | O76062               | Transmembrane 7 superfamily member 2                             | Enzyme                  | 217 | 0.486 | 0.808 | 0.00 | 0.01 |  | 1.00 | 1 | 0 | 2017 | 2017 |
| CLDN5       | 7122   | O00501               | Claudin 5                                                        | Cell-cell junction      | 104 | 0.559 | 0.769 | 0.90 | 0.01 |  | 1.00 | 1 | 0 | 2018 | 2018 |
| TNFAIP3     | 7128   | P21580               | TNF $\alpha$ induced protein 3                                   | Enzyme                  | 212 | 0.481 | 0.808 | 1.00 | 0.01 |  | 1.00 | 1 | 0 | 2015 | 2015 |
| TNFRSF1A    | 7132   | P19438               | TNF receptor superfamily member 1A                               |                         | 487 | 0.409 | 0.923 | 0.99 | 0.01 |  | 1.00 | 1 | 0 | 2017 | 2017 |
| TNNI3       | 7137   | P19429               | Troponin I3, cardiac type                                        | Cellular structure      | 159 | 0.52  | 0.769 | 0.10 | 0.01 |  | 1.00 | 1 | 0 | 2017 | 2017 |
| TRC-GCA24-1 | 7183   |                      | Trna-Cys (GCA) 24-1                                              |                         | 21  | 0.729 | 0.346 |      | 0.01 |  | 1.00 | 1 | 0 | 2018 | 2018 |
| TRAF3       | 7187   | Q13114               | TNF receptor associated factor 3                                 | Signaling               | 129 | 0.541 | 0.769 | 1.00 | 0.01 |  | 1.00 | 1 | 0 | 2016 | 2016 |
| ACTG2       | 72     | P63267               | Actin $\gamma$ 2, smooth muscle                                  | Cellular structure      | 205 | 0.505 | 0.808 | 0.07 | 0.01 |  | 1.00 | 1 | 0 | 2010 | 2010 |
| TRH         | 7200   | P20396               | Thyrotropin releasing hormone                                    |                         | 230 | 0.519 | 0.846 | 0.00 | 0.01 |  | 1.00 | 1 | 0 | 2017 | 2017 |
| TRPC6       | 7225   | Q9Y210               | Transient receptor potential cation channel subfamily C member 6 | Ion channel             | 166 | 0.514 | 0.692 | 0.00 | 0.01 |  | 1.00 | 1 | 0 | 2019 | 2019 |
| TRPM2       | 7226   | O94759               | Transient receptor potential cation channel subfamily M member 2 | Ion channel             | 133 | 0.546 | 0.731 | 0.00 | 0.01 |  | 1.00 | 1 | 0 | 2016 | 2016 |
| TRPS1       | 7227   | Q9UHF7               | Transcriptional repressor GATA binding 1                         |                         | 248 | 0.537 | 0.769 | 1.00 | 0.01 |  | 1.00 | 1 | 1 | 2019 | 2019 |
| C5          | 727    | P01031               | Complement C5                                                    | Enzyme modulator        | 129 | 0.55  | 0.731 | 0.00 | 0.01 |  | 1.00 | 1 | 2 | 2016 | 2016 |
| TTR         | 7276   | P02766               | Transthyretin                                                    | Transporter             | 461 | 0.423 | 0.885 | 0.52 | 0.01 |  | 1.00 | 1 | 0 | 2017 | 2017 |
| UBE2L3      | 7332   | P68036               | Ubiquitin conjugating enzyme E2 L3                               | Enzyme                  | 56  | 0.644 | 0.615 | 0.84 | 0.01 |  | 1.00 | 1 | 0 | 2019 | 2019 |
| UCHL1       | 7345   | P09936               | Ubiquitin C-terminal hydrolase L1                                | Enzyme                  | 260 | 0.482 | 0.885 | 0.99 | 0.01 |  | 1.00 | 1 | 0 | 2017 | 2017 |
| UGCG        | 7357   | Q16739               | UDP-glucose ceramide glucosyltransferase                         | Enzyme                  | 111 | 0.56  | 0.808 | 0.94 | 0.01 |  | 1.00 | 1 | 0 | 2018 | 2018 |
| UGT2B4      | 7363   | P06133               | UDP glucuronosyltransferase family 2 member B4                   |                         | 16  | 0.751 | 0.231 | 0.00 | 0.01 |  | 1.00 | 1 | 0 | 2019 | 2019 |
| UMOD        | 7369   | P07911               | Uromodulin                                                       |                         | 164 | 0.52  | 0.846 | 0.00 | 0.01 |  | 1.00 | 1 | 0 | 2018 | 2018 |
| VPS51       | 738    | Q9UID3               | VPS51 subunit of GARP complex                                    |                         | 292 | 0.452 | 0.846 | 0.00 | 0.01 |  | 1.00 | 1 | 0 | 2014 | 2014 |
| USF1        | 7391   | P22415               | Upstream transcription factor 1                                  |                         | 82  | 0.592 | 0.692 | 0.02 | 0.01 |  | 1.00 | 1 | 0 | 2018 | 2018 |
| UTRN        | 7402   | P46939               | Utrophin                                                         |                         | 152 | 0.525 | 0.692 | 0.00 | 0.01 |  | 1.00 | 1 | 0 | 2017 | 2017 |
| VASP        | 7408   | P50552               | Vasodilator stimulated phosphoprotein                            |                         | 65  | 0.626 | 0.577 | 0.95 | 0.01 |  | 1.00 | 1 | 0 | 2014 | 2014 |
| VDR         | 7421   | P11473               | Vitamin D receptor                                               | Nuclear receptor        | 852 | 0.352 | 0.885 | 0.00 | 0.01 |  | 1.00 | 1 | 0 | 2015 | 2015 |
| VEGFB       | 7423   | P49765               | Vascular endothelial growth factor B                             | Signaling               | 82  | 0.592 | 0.615 | 0.00 | 0.01 |  | 1.00 | 1 | 0 | 2018 | 2018 |
| VIP         | 7432   | P01282               | Vasoactive intestinal peptide                                    | Signaling               | 376 | 0.437 | 0.846 | 0.00 | 0.01 |  | 1.00 | 1 | 0 | 2017 | 2017 |
| VSNL1       | 7447   | P62760               | Visinin like 1                                                   |                         | 52  | 0.631 | 0.423 | 0.46 | 0.01 |  | 1.00 | 1 | 0 | 2019 | 2019 |
| VTN         | 7448   | P04004               | Vitronectin                                                      |                         | 178 | 0.509 | 0.769 | 0.00 | 0.01 |  | 1.00 | 1 | 0 | 2020 | 2020 |
| WRN         | 7486   | Q14191               | WRN reqc like helicase                                           | Enzyme                  | 172 | 0.524 | 0.808 | 0.00 | 0.01 |  | 1.00 | 1 | 1 | 2017 | 2017 |
| CACNA1C     | 775    | Q13936               | Calcium voltage-gated channel subunit $\alpha$ 1 C               | Ion channel             | 225 | 0.51  | 0.846 | 1.00 | 0.01 |  | 1.00 | 1 | 0 | 2018 | 2018 |
| ZNF208      | 7757   | O43345               | Zinc finger protein 208                                          |                         | 11  | 0.769 | 0.231 | 0.00 | 0.01 |  | 1.00 | 1 | 3 | 2017 | 2017 |
| MANF        | 7873   | P55145               | Mesencephalic astrocyte derived neurotrophic factor              |                         | 62  | 0.621 | 0.654 | 0.00 | 0.01 |  | 1.00 | 1 | 0 | 2020 | 2020 |
| REEP5       | 7905   | Q00765               | Receptor accessory protein 5                                     | Transporter             | 49  | 0.633 | 0.615 | 0.00 | 0.01 |  | 1.00 | 1 | 0 | 2019 | 2019 |
| MUL1        | 79594  | Q969V5               | Mitochondrial E3 ubiquitin protein ligase 1                      |                         | 241 | 0.473 | 0.808 | 0.00 | 0.01 |  | 1.00 | 1 | 0 | 2019 | 2019 |
| ADIPOR2     | 79602  | Q86V24               | Adiponectin receptor 2                                           | Receptor                | 103 | 0.564 | 0.731 | 0.36 | 0.01 |  | 1.00 | 1 | 1 | 2014 | 2014 |
| TNFAIP8L2   | 79626  | Q6P589               | TNF $\alpha$ induced protein 8 like 2                            |                         | 90  | 0.575 | 0.615 | 0.04 | 0.01 |  | 0.00 | 1 | 0 | 2018 | 2018 |
| DHX40       | 79665  | Q8IX18               | DEAH-box helicase 40                                             | Enzyme                  | 64  | 0.608 | 0.769 | 0.76 | 0.01 |  | 1.00 | 1 | 0 | 2013 | 2013 |
| TFPI2       | 7980   | P48307               | Tissue factor pathway inhibitor 2                                | Enzyme modulator        | 161 | 0.521 | 0.769 | 0.00 | 0.01 |  | 1.00 | 1 | 0 | 2006 | 2006 |
| EHMT1       | 79813  | Q9H9B1               | Euchromatic histone lysine methyltransferase 1                   | Epigenetic regulator    | 371 | 0.46  | 0.808 | 1.00 | 0.01 |  | 1.00 | 1 | 0 | 2019 | 2019 |
| ARHGEF5     | 7984   | Q12774               | Rho guanine nucleotide exchange factor 5                         |                         | 140 | 0.526 | 0.808 | 0.00 | 0.01 |  | 1.00 | 1 | 0 | 2017 | 2017 |
| MAP9        | 79884  | Q49MG5               | Microtubule associated protein 9                                 |                         | 25  | 0.729 | 0.462 | 0.00 | 0.01 |  | 1.00 | 1 | 0 | 2019 | 2019 |
| ERMP1       | 79956  | Q7Z2K6               | Endoplasmic reticulum metallopeptidase 1                         | Enzyme                  | 8   | 0.861 | 0.154 | 0.00 | 0.01 |  | 1.00 | 1 | 0 | 2019 | 2019 |
| WLS         | 79971  | Q5T9L3               | Wnt ligand secretion mediator                                    |                         | 166 | 0.513 | 0.731 | 0.02 | 0.01 |  | 1.00 | 1 | 0 | 2019 | 2019 |
| NAA25       | 80018  | Q14CX7               | N- $\alpha$ -acetyltransferase 25, natb auxiliary subunit        | Enzyme                  | 81  | 0.603 | 0.692 | 1.00 | 0.01 |  | 1.00 | 1 | 0 | 2019 | 2019 |
| CALM1       | 801    | P0DP23;P0DP24;P0DP25 | Calmodulin 1                                                     | Calcium-binding protein | 253 | 0.472 | 0.808 | 0.94 | 0.01 |  | 1.00 | 1 | 1 | 2018 | 2018 |
| ZC3H12A     | 80149  | Q5D1E8               | Zinc finger CCCH-type containing 12A                             | Nucleic acid binding    | 88  | 0.578 | 0.654 | 0.14 | 0.01 |  | 1.00 | 1 | 0 | 2011 | 2011 |
| FLAD1       | 80308  | Q8NFF5               | Flavin adenine dinucleotide synthetase 1                         |                         | 58  | 0.638 | 0.692 | 0.01 | 0.01 |  | 1.00 | 1 | 0 | 2014 | 2014 |
| KCNIP4      | 80333  | Q6PIL6               | Potassium voltage-gated channel interacting protein 4            | Ion channel             | 31  | 0.716 | 0.385 | 0.82 | 0.01 |  | 1.00 | 1 | 0 | 2019 | 2019 |
| CALR        | 811    | P27797               | Calreticulin                                                     | Calcium-binding protein | 487 | 0.413 | 0.923 | 0.89 | 0.01 |  | 1.00 | 1 | 0 | 2015 | 2015 |
| CALU        | 813    | O43852               | Calumenin                                                        | Calcium-binding protein | 33  | 0.7   | 0.385 | 0.01 | 0.01 |  | 1.00 | 1 | 0 | 2007 | 2007 |
| AKAP1       | 8165   | Q92667               | A-kinase anchoring protein 1                                     | Enzyme                  | 35  | 0.678 | 0.577 | 0.74 | 0.01 |  | 1.00 | 1 | 0 | 2018 | 2018 |
| RNF146      | 81847  | Q9NTX7               | Ring finger protein 146                                          |                         | 27  | 0.705 | 0.577 | 0.82 | 0.01 |  | 1.00 | 1 | 0 | 2017 | 2017 |
| QTRT1       | 81890  | Q9BXR0               | Queuine trna-ribosyltransferase catalytic subunit 1              |                         | 39  | 0.659 | 0.538 | 0.00 | 0.01 |  | 1.00 | 1 | 0 | 2019 | 2019 |
| BRAP        | 8315   | Q7Z569               | BRCA1 associated protein                                         |                         | 82  | 0.612 | 0.769 | 0.00 | 0.01 |  | 1.00 | 1 | 0 | 2013 | 2013 |
| CASP1       | 834    | P29466               | Caspase 1                                                        | Enzyme                  | 444 | 0.413 | 0.885 | 0.00 | 0.01 |  | 1.00 | 1 | 0 | 2019 | 2019 |

|           |       |        |                                                                |                            |     |       |       |      |      |  |      |   |   |      |      |
|-----------|-------|--------|----------------------------------------------------------------|----------------------------|-----|-------|-------|------|------|--|------|---|---|------|------|
| PLVAP     | 83483 | Q9BX97 | Plasmalemma vesicle associated protein                         |                            | 40  | 0.695 | 0.538 | 0.00 | 0.01 |  | 1.00 | 1 | 0 | 2018 | 2018 |
| BCO2      | 83875 | Q9BYV7 | B-carotene oxygenase 2                                         |                            | 19  | 0.78  | 0.231 | 0.00 | 0.01 |  | 1.00 | 1 | 1 | 2019 | 2019 |
| TSPAN10   | 83882 | Q9H1Z9 | Tetraspanin 10                                                 |                            | 9   | 0.821 | 0.269 | 0.00 | 0.01 |  | 1.00 | 1 | 0 | 2014 | 2014 |
| CASP7     | 840   | P55210 | Caspase 7                                                      | Enzyme                     | 83  | 0.581 | 0.654 | 0.00 | 0.01 |  | 1.00 | 1 | 1 | 2019 | 2019 |
| CASP8     | 841   | Q14790 | Caspase 8                                                      | Enzyme                     | 480 | 0.404 | 0.923 | 0.00 | 0.01 |  | 1.00 | 1 | 0 | 2018 | 2018 |
| MINDY4    | 84182 | Q4G0A6 | MINDY lysine 48 deubiquitinase 4                               |                            | 122 | 0.538 | 0.731 | 0.00 | 0.01 |  | 1.00 | 1 | 0 | 2017 | 2017 |
| KLF11     | 8462  | O14901 | Kruppel like factor 11                                         | Nucleic acid binding       | 70  | 0.626 | 0.654 | 0.00 | 0.01 |  | 1.00 | 1 | 0 | 2018 | 2018 |
| NTNG2     | 84628 | Q96CW9 | Netrin G2                                                      | Enzyme modulator           | 31  | 0.7   | 0.423 | 1.00 | 0.01 |  | 1.00 | 1 | 0 | 2013 | 2013 |
| KDM2B     | 84678 | Q8NHM5 | Lysine demethylase 2B                                          | Epigenetic regulator       | 86  | 0.592 | 0.692 | 1.00 | 0.01 |  | 1.00 | 1 | 0 | 2017 | 2017 |
| ACCS      | 84680 | Q96QU6 | 1-aminocyclopropane-1-carboxylate synthase homolog (inactive)  | Enzyme                     | 161 | 0.522 | 0.731 | 0.00 | 0.01 |  | 1.00 | 1 | 0 | 2018 | 2018 |
| CAT       | 847   | P04040 | Catalase                                                       | Enzyme                     | 794 | 0.359 | 0.962 | 0.00 | 0.01 |  | 1.00 | 1 | 0 | 2017 | 2017 |
| PSRC1     | 84722 | Q6PGN9 | Proline and serine rich coiled-coil 1                          |                            | 13  | 0.76  | 0.269 | 0.00 | 0.01 |  | 1.00 | 1 | 1 | 2015 | 2015 |
| GPR65     | 8477  | Q8IYL9 | G protein-coupled receptor 65                                  | G-protein coupled receptor | 47  | 0.653 | 0.5   | 0.11 | 0.01 |  | 1.00 | 1 | 0 | 2017 | 2017 |
| IL17RC    | 84818 | Q8NAC3 | Interleukin 17 receptor C                                      |                            | 65  | 0.633 | 0.615 | 0.00 | 0.01 |  | 1.00 | 1 | 0 | 2019 | 2019 |
| ORAI1     | 84876 | Q96D31 | ORAI calcium release-activated calcium modulator 1             | Ion channel                | 195 | 0.52  | 0.808 | 0.00 | 0.01 |  | 1.00 | 1 | 0 | 2017 | 2017 |
| APOL1     | 8542  | O14791 | Apolipoprotein L1                                              | Transporter                | 115 | 0.547 | 0.615 | 0.00 | 0.01 |  | 1.00 | 1 | 0 | 2018 | 2018 |
| DOCK7     | 85440 | Q96N67 | Dedicator of cytokinesis 7                                     | Enzyme modulator           | 51  | 0.682 | 0.423 | 0.00 | 0.01 |  | 1.00 | 1 | 3 | 2018 | 2018 |
| PIAS1     | 8554  | O75925 | Protein inhibitor of activated STAT 1                          |                            | 54  | 0.633 | 0.731 | 1.00 | 0.01 |  | 1.00 | 1 | 0 | 2018 | 2018 |
| DENR      | 8562  | O43583 | Density regulated re-initiation and release factor             | Enzyme                     | 121 | 0.543 | 0.692 | 0.88 | 0.01 |  | 1.00 | 1 | 0 | 2017 | 2017 |
| MADD      | 8567  | Q8WXG6 | MAP kinase activating death domain                             |                            | 57  | 0.644 | 0.538 | 0.00 | 0.01 |  | 1.00 | 1 | 0 | 2016 | 2016 |
| TNFSF11   | 8600  | O14788 | TNF superfamily member 11                                      | Signaling                  | 327 | 0.453 | 0.846 | 0.00 | 0.01 |  | 1.00 | 1 | 1 | 2016 | 2016 |
| PLPP3     | 8613  | O14495 | Phospholipid phosphatase 3                                     | Enzyme                     | 30  | 0.722 | 0.192 | 0.92 | 0.01 |  | 1.00 | 1 | 1 | 2018 | 2018 |
| PDE5A     | 8654  | O76074 | Phosphodiesterase 5A                                           |                            | 187 | 0.513 | 0.731 | 0.00 | 0.01 |  | 1.00 | 1 | 0 | 2019 | 2019 |
| TNKS      | 8658  | O95271 | Tankyrase                                                      |                            | 88  | 0.576 | 0.692 | 0.01 | 0.01 |  | 1.00 | 1 | 0 | 2011 | 2011 |
| ABCC3     | 8714  | O15438 | ATP binding cassette subfamily C member 3                      | Transporter                | 160 | 0.517 | 0.769 | 0.00 | 0.01 |  | 1.00 | 1 | 0 | 2014 | 2014 |
| TNFSF14   | 8740  | O43557 | TNF superfamily member 14                                      | Signaling                  | 143 | 0.529 | 0.769 | 0.05 | 0.01 |  | 1.00 | 1 | 0 | 2008 | 2008 |
| TNFSF10   | 8743  | P50591 | TNF superfamily member 10                                      | Signaling                  | 445 | 0.413 | 0.885 | 0.13 | 0.01 |  | 1.00 | 1 | 0 | 2018 | 2018 |
| TNFRSF11A | 8792  | Q9Y6Q6 | TNF receptor superfamily member 11a                            |                            | 270 | 0.48  | 0.846 | 0.01 | 0.01 |  | 1.00 | 1 | 0 | 2016 | 2016 |
| IL18RAP   | 8807  | O95256 | Interleukin 18 receptor accessory protein                      | Receptor                   | 41  | 0.674 | 0.577 | 0.00 | 0.01 |  | 1.00 | 1 | 0 | 2012 | 2012 |
| IL18R1    | 8809  | Q13478 | Interleukin 18 receptor 1                                      | Receptor                   | 234 | 0.473 | 0.808 | 0.00 | 0.01 |  | 1.00 | 1 | 0 | 2019 | 2019 |
| NR1I2     | 8856  | O75469 | Nuclear receptor subfamily 1 group I member 2                  | Nuclear receptor           | 462 | 0.418 | 0.846 | 0.00 | 0.01 |  | 1.00 | 1 | 1 | 2019 | 2019 |
| SQSTM1    | 8878  | Q13501 | Sequestosome 1                                                 |                            | 470 | 0.428 | 0.885 | 0.00 | 0.01 |  | 1.00 | 1 | 0 | 2017 | 2017 |
| OTULIN    | 90268 | Q96BN8 | OTU deubiquitinase with linear linkage specificity             |                            | 26  | 0.751 | 0.346 | 0.22 | 0.01 |  | 1.00 | 1 | 0 | 2018 | 2018 |
| USP14     | 9097  | P54578 | Ubiquitin specific peptidase 14                                | Enzyme                     | 79  | 0.595 | 0.654 | 0.91 | 0.01 |  | 1.00 | 1 | 0 | 2019 | 2019 |
| LPAR2     | 9170  | Q9HBW0 | Lysophosphatidic acid receptor 2                               | G-protein coupled receptor | 285 | 0.463 | 0.846 | 0.04 | 0.01 |  | 1.00 | 1 | 0 | 2015 | 2015 |
| IL1RL1    | 9173  | Q01638 | Interleukin 1 receptor like 1                                  | Receptor                   | 117 | 0.547 | 0.731 | 0.00 | 0.01 |  | 1.00 | 1 | 0 | 2013 | 2013 |
| XPR1      | 9213  | Q9UBH6 | Xenotropic and polytropic retrovirus receptor 1                | Transporter                | 217 | 0.488 | 0.731 | 1.00 | 0.01 |  | 1.00 | 1 | 0 | 2015 | 2015 |
| METTL18   | 92342 | O95568 | Methyltransferase like 18                                      |                            | 1   | 1     | 0.077 | 0.00 | 0.01 |  | 1.00 | 1 | 1 | 2014 | 2014 |
| NOG       | 9241  | Q13253 | Noggin                                                         |                            | 206 | 0.518 | 0.731 | 0.89 | 0.01 |  | 1.00 | 1 | 0 | 2018 | 2018 |
| MSC       | 9242  | O60682 | Musculin                                                       |                            | 241 | 0.475 | 0.846 | 0.02 | 0.01 |  | 1.00 | 1 | 0 | 2014 | 2014 |
| SPECC1    | 92521 | Q5M775 | Sperm antigen with calponin homology and coiled-coil domains 1 |                            | 47  | 0.659 | 0.577 | 0.00 | 0.01 |  | 1.00 | 1 | 0 | 2011 | 2011 |
| DNER      | 92737 | Q8NFT8 | Δ/notch like EGF repeat containing                             |                            | 203 | 0.493 | 0.769 | 0.19 | 0.01 |  | 1.00 | 1 | 0 | 2018 | 2018 |
| ASIC3     | 9311  | Q9UHC3 | Acid sensing ion channel subunit 3                             | Ion channel                | 51  | 0.663 | 0.538 | 0.00 | 0.01 |  | 1.00 | 1 | 0 | 2019 | 2019 |
| CD163     | 9332  | Q86VB7 | CD163 molecule                                                 | Enzyme                     | 369 | 0.427 | 0.846 | 0.00 | 0.01 |  | 1.00 | 1 | 0 | 2017 | 2017 |
| ZFYVE9    | 9372  | O95405 | Zinc finger FYVE-type containing 9                             |                            | 59  | 0.647 | 0.615 | 0.90 | 0.01 |  | 1.00 | 1 | 0 | 2011 | 2011 |
| CD28      | 940   | P10747 | CD28 molecule                                                  |                            | 364 | 0.436 | 0.885 | 0.36 | 0.01 |  | 1.00 | 1 | 0 | 2009 | 2009 |
| MUC16     | 94025 | Q8WXI7 | Mucin 16, cell surface associated                              |                            | 236 | 0.479 | 0.808 | 0.00 | 0.01 |  | 1.00 | 1 | 0 | 2018 | 2018 |
| FADS2     | 9415  | O95864 | Fatty acid desaturase 2                                        |                            | 140 | 0.575 | 0.692 | 1.00 | 0.01 |  | 1.00 | 1 | 3 | 2015 | 2015 |
| HOMER2    | 9455  | Q9NSB8 | Homer scaffold protein 2                                       |                            | 29  | 0.691 | 0.5   | 0.01 | 0.01 |  | 1.00 | 1 | 0 | 2016 | 2016 |
| HOMER1    | 9456  | Q86YM7 | Homer scaffold protein 1                                       |                            | 85  | 0.636 | 0.538 | 1.00 | 0.01 |  | 1.00 | 1 | 0 | 2016 | 2016 |
| FHL5      | 9457  | Q5TD97 | Four and a half LIM domains 5                                  | Transcription factor       | 153 | 0.53  | 0.769 | 0.00 | 0.01 |  | 1.00 | 1 | 0 | 2010 | 2010 |
| CD34      | 947   | P28906 | CD34 molecule                                                  |                            | 674 | 0.368 | 0.808 | 0.00 | 0.01 |  | 1.00 | 1 | 0 | 2018 | 2018 |
| CD36      | 948   | P16671 | CD36 molecule                                                  | Receptor                   | 351 | 0.446 | 0.846 | 0.00 | 0.01 |  | 1.00 | 1 | 0 | 2003 | 2003 |
| ADAMTS4   | 9507  | O75173 | ADAM metallopeptidase with thrombospondin type 1 motif 4       | Enzyme                     | 84  | 0.582 | 0.692 | 0.00 | 0.01 |  | 1.00 | 1 | 0 | 2017 | 2017 |
| ADAMTS3   | 9508  | O15072 | ADAM metallopeptidase with thrombospondin type 1 motif 3       | Enzyme                     | 116 | 0.581 | 0.808 | 0.00 | 0.01 |  | 1.00 | 1 | 0 | 2017 | 2017 |
| GTPBP1    | 9567  | O00178 | GTP binding protein 1                                          | Enzyme                     | 13  | 0.792 | 0.308 | 0.93 | 0.01 |  | 0.00 | 1 | 0 | 2005 | 2005 |
| SNCAIP    | 9627  | Q9Y6H5 | Synuclein α interacting protein                                |                            | 44  | 0.691 | 0.423 | 0.00 | 0.01 |  | 1.00 | 1 | 0 | 2019 | 2019 |
| PDE4DIP   | 9659  | Q5VU43 | Phosphodiesterase 4D interacting protein                       |                            | 12  | 0.769 | 0.308 | 0.00 | 0.01 |  | 1.00 | 1 | 1 | 2015 | 2015 |
| CD74      | 972   | P04233 | CD74 molecule                                                  | Enzyme modulator           | 170 | 0.512 | 0.808 | 0.25 | 0.01 |  | 1.00 | 1 | 0 | 2017 | 2017 |
| HDAC4     | 9759  | P56524 | Histone deacetylase 4                                          | Epigenetic regulator       | 256 | 0.484 | 0.885 | 1.00 | 0.01 |  | 1.00 | 1 | 0 | 2018 | 2018 |
| ACYP2     | 98    | P14621 | Acylphosphatase 2                                              | Enzyme                     | 42  | 0.659 | 0.577 | 0.00 | 0.01 |  | 1.00 | 1 | 4 | 2017 | 2017 |
| XYLB      | 9942  | O75191 | Xylulokinase                                                   | Kinase                     | 8   | 0.821 | 0.154 | 0.00 | 0.01 |  | 1.00 | 1 | 1 | 2014 | 2014 |
| SLC23A2   | 9962  | Q9UGH3 | Solute carrier family 23 member 2                              | Transporter                | 46  | 0.65  | 0.615 | 0.01 | 0.01 |  | 1.00 | 1 | 0 | 2019 | 2019 |
|           |       |        |                                                                |                            |     |       |       | 0.00 | 0.01 |  | 1.00 |   |   |      |      |
| CCS       | 9973  | O14618 | Copper chaperone for superoxide dismutase                      | Enzyme                     | 56  | 0.628 | 0.423 |      |      |  |      | 1 | 0 | 2017 | 2017 |

**Table SVI.** IS targets in the DrugBank

| Target                                 | Gene   |
|----------------------------------------|--------|
| Glutamate receptor ionotropic, NMDA 2B | GRIK1  |
| Acid-sensing ion channel 3             | ASIC3  |
| Hypoxia-inducible factor 1- $\alpha$   | HIF1A  |
| Acid-sensing ion channel 1             | ASIC1  |
| Death-associated protein kinase 1      | DAPK1  |
| NMDA receptor                          | DLG2   |
| Glutamate (NMDA) receptor              | GRIN3B |
| Protein kinase C $\gamma$ type         | KCNB1  |
| Protein kinase C                       | PDPK1  |
| Voltage-gated potassium channel        | KCNC2  |

**Table SVII.** IS targets in the TTD.

| Target  |
|---------|
| BCL2L11 |
| ABCA1   |
| ABCC8   |
| ACE     |
| ACTA2   |
| ADA2    |
| ADORA2A |
| AGAP2   |
| AGT     |
| AGTR1   |
| AKT1    |
| AKT1S1  |
| ALDH2   |
| ALOX5AP |
| APOA1   |
| APOB    |
| APOE    |
| APP     |
| AQP1    |
| AQP4    |
| ASIC1   |
| ATP7B   |
| BAK1    |
| BARD1   |
| BDKRB1  |
| BDKRB2  |
| C3      |
| C3AR1   |
| CBS     |
| CD4     |
| CDK5    |
| CFH     |
| COL3A1  |
| COL4A1  |
| CTSL    |
| CXCL12  |
| DAPK1   |
| DDIT4   |
| DLG4    |
| EPHX2   |
| EPO     |
| F2      |

F5  
FGB  
G6PD  
GH1  
GP1BA  
GRIN1  
GRIN2A  
GRIN2B  
GUCY1A1  
HIF1A  
HMGCR  
HMOX1  
HSF1  
HYOU1  
IL4  
JAK2  
KCNE2  
KCNK2  
KDR  
LDLR  
LGMN  
LPL  
MAPK10  
MAPKAPK2  
MIF  
MMP2  
MMP9  
MTHFR  
MYBPC3  
NOS1  
NOS3  
NOTCH3  
NPPB  
NPY  
P2RX5  
PCSK9  
PDE4D  
PDGFC  
PDGFRA  
PGF  
PLA2G7  
PLG  
PPARGC1A  
PRKAA1

PRKCE  
PRKN  
PROS1  
PTGER2  
SELENOS  
SELP  
SERPINE1  
SIRT2  
SLC1A2  
SREBF1  
THBD  
THBS1  
TLR4  
TNF  
TNFRSF1A  
TNFRSF1B  
TRNL1  
TRPA1  
VCAM1  
VEGFA

---

Table SVIII. IS targets in the OMIM.

|             |             |                                           |           |
|-------------|-------------|-------------------------------------------|-----------|
| T68547      | Target Name | Histone deacetylase 1                     |           |
| Target Info | Target type | Successful Target                         |           |
|             | Disease     | Cutaneous T-cell lymphoma; Breast cancer; |           |
| T85435      | Drugs       | Panobinostat                              | Drug Info |
|             | Target Name | Insulin receptor (INSR)                   |           |
| Target Info | Target type | Successful Target                         |           |
|             | Disease     | Psychotic disorder; Alzheimer disease;    |           |
| T94033      | Drugs       | Meglitinides                              | Drug Info |
|             | Target Name | Coagulation factor IIa (F2)               |           |
| Target Info | Target type | Successful Target                         |           |
|             | Disease     | Stroke; Multiple sclerosis;               |           |
| T97587      | Drugs       | Ximelegatran                              | Drug Info |
|             | Target Name | Integrin alpha-4 (ITGA4)                  |           |
| Target Info | Target type | Successful Target                         |           |

|             |             |                                               |           |
|-------------|-------------|-----------------------------------------------|-----------|
| T89034      | Disease     | Crohn disease; Multiple sclerosis;            | Drug Info |
|             | Drugs       | Vedolizumab                                   |           |
|             | Target Name | Plasminogen (PLG)                             |           |
| Target Info | Target type | Successful Target                             |           |
|             | Disease     | Chronic/stable angina; Bleeding disorder;     |           |
|             | Drugs       | Tranexamic Acid                               |           |
| T24836      | Target Name | Vitamin K-dependent protein C (PROC)          | Drug Info |
|             | Target type | Successful Target                             |           |
|             | Disease     | Varicose and spider veins of leg; Hemangioma; |           |
| T46937      | Drugs       | Sodium Tetradecyl Sulfate                     | Drug Info |
|             | Target Name | P2Y purinoceptor 12 (P2RY12)                  |           |
|             | Target type | Successful Target                             |           |
| Target Info | Disease     | Acute coronary syndrome; Thrombosis;          |           |
|             | Drugs       | Clopidogrel                                   |           |
|             |             |                                               |           |

|             |             |                                              |           |
|-------------|-------------|----------------------------------------------|-----------|
| T88185      | Target Name | Nicotinic acid receptor (HCAR2)              |           |
| Target Info | Target type | Successful Target                            |           |
|             | Disease     | Lipid metabolism disorder; Arteriosclerosis; |           |
| T98022      | Drugs       | Vitamin B3                                   | Drug Info |
|             | Target Name | Carboxypeptidase B2 (CPB2)                   |           |
|             | Target type | Clinical trial Target                        |           |
| Target Info | Disease     | Cerebrovascular ischaemia; Ischemic stroke;  |           |
|             |             |                                              |           |
| T29683      | Drugs       | SAR-126119                                   | Drug Info |
|             | Target Name | Neuromedin-K receptor (TACR3)                |           |
|             | Target type | Clinical trial Target                        |           |
| Target Info | Disease     | Ischemic stroke; Epilepsy;                   |           |
|             |             |                                              |           |
| T86702      | Drugs       | Talnetant                                    | Drug Info |
|             | Target Name | Matrix metalloproteinase-3 (MMP-3)           |           |
|             | Target type | Patented-recorded Target                     |           |
| Target Info | Disease     | Ischemic stroke; Corneal ulcer;              |           |
|             |             |                                              |           |
| T56367      | Drugs       | PMID29130358-Compound-Figure10(2a)           | Drug Info |
|             | Target Name | Phosphodiesterase 1 (PDE1)                   |           |

|             |             |                                           |           |
|-------------|-------------|-------------------------------------------|-----------|
| Target Info | Target type | Successful Target                         | Drug Info |
|             | Disease     | Ischemic stroke; Parkinson disease;       |           |
|             | Drugs       | Vinpocetine                               |           |
| T69494      | Target Name | N-methyl-D-aspartate receptor (NMDAR)     |           |
| Target Info | Target type | Successful Target                         | Drug Info |
|             | Disease     | Acute pain; Alzheimer disease;            |           |
|             | Drugs       | L-Glutamic Acid                           |           |
| T23547      | Target Name | Opioid receptor (OPR)                     |           |
| Target Info | Target type | Successful Target                         | Drug Info |
|             | Disease     | Dry cough; Pain;                          |           |
|             | Drugs       | Methadone                                 |           |
| T34867      | Target Name | Poly [ADP-ribose] polymerase (PARP)       |           |
| Target Info | Target type | Successful Target                         | Drug Info |
|             | Disease     | Brain cancer; Non-small-cell lung cancer; |           |
|             | Drugs       | Olaparib                                  |           |

---

**Table SIX.** Potentially disease-associated genes obtained by combined analysis.

| Potential disease-associated gene |
|-----------------------------------|
| NOTCH3                            |
| F5                                |
| F2                                |
| NOS3                              |
| MT-TL1                            |
| ALOX5AP                           |
| FBN1                              |
| PRKCH                             |
| ACE                               |
| LDLR                              |
| MTHFR                             |
| GP1BA                             |
| PIK3CA                            |
| ACSL4                             |
| COL4A1                            |
| ENG                               |
| CRP                               |
| MT-ND1                            |
| APOE                              |
| IL6                               |
| TNF                               |
| AGTR1                             |
| MT-ND5                            |
| SERPINE1                          |
| MT-ND6                            |
| AGT                               |
| ADA2                              |
| MT-ND4                            |
| MT-CO1                            |
| PDE4D                             |
| ACTA2                             |
| PLAT                              |
| NPPA                              |
| MMP9                              |
| MT-ATP6                           |
| SELP                              |
| GLA                               |
| NPPB                              |
| CST3                              |
| PON1                              |
| ADAMTS13                          |
| IL1B                              |

HTRA1  
RNF213  
VWF  
APOH  
SERPINC1  
JAK2  
COL4A2  
MT-CO2  
MAPT  
BDNF  
VEGFA  
GUCY1A1  
FGA  
APP  
APOB  
LPA  
TLR4  
F7  
MT-CO3  
PTGIS  
F3  
TP53  
EDNRA  
PLA2G7  
ITGB3  
IL10  
ELN  
THBD  
PON2  
CXCL12  
CASP3  
ALB  
PRKG1  
SERPINA3  
PROZ  
LMNA  
REN  
EDN1  
TGFB2  
SOD2  
VKORC1  
CDKN2B-AS1  
MYH11  
ENO2

RNF213-AS1  
FGB  
ACTA2-AS1  
P2RY12  
LOX  
ABCA1  
COL3A1  
HIF1A  
ALOX5  
F10  
PECAM1  
OLR1  
HMGCR  
SMAD3  
SELE  
MYLK  
ADM  
LOC102723566  
ACVRL1  
ANGPT1  
SMAD4  
GSR  
TGFB2  
PROCR  
F2R  
SLC2A10  
NGB  
PSEN1  
ICAM1  
ADIPOQ  
TGFB1  
PF4  
HSPA4  
ENPP1  
AVP  
SH2B3  
PIK3C2A  
AQP4  
PLG  
HMG1  
CYCS  
MAP2  
ADORA1  
MPL

KCNQ1  
INS  
TTR  
CREB1  
GJA1  
GNB3  
F9  
AKT1  
TNNI3  
TNNT2  
PPBP  
ABCC6  
MB  
LPL  
EPOR  
TNFRSF1A  
APOA1  
SLC1A2  
CCL2  
SERPINI1  
MALAT1  
EDNRB  
CASP1  
SERPINF2  
IGF1  
CXCR4  
GATA4  
MT-CYB  
SULT1A3  
HSPA8  
MBP  
GP6  
NES  
ADD1  
AOC3  
PPARG  
THPO  
GDNF  
ITGA2  
ESR1  
F13A1  
TET2  
TH  
VCAM1

TSPO  
CCL3  
BMP7  
SIRT1  
ANXA5  
CALR  
CXCL8  
TGFB3  
HBA1  
CYP2C19  
TBXA2R  
PTGS2  
TREX1  
SPP1  
NKX2-5  
ENTPD1  
ACTC1  
MFAP5  
F12  
NFE2L2  
ADRB2  
ADORA3  
CD40LG  
SOD1  
MYBPC3  
MAT2A  
AGTR2  
ADORA2A  
IL1RN  
FOXE3  
IL4  
MMP2  
RPL36A-HNRNPH2  
MAPK3  
MMP3  
DCX  
KNG1  
TNFRSF12A  
PTEN  
MIAT  
FGF2  
ITGA2B  
SCN5A  
CD14

SERPIND1  
BACE1  
HBB  
HEY2  
MYH7  
TGFB1  
SON  
CASP9  
BRCC3  
HHT4  
GATA6  
CBS  
AIF1  
RETN  
DARS2  
SMAD2  
NDE1  
PMM2  
F8  
NTF3  
MIR21  
CYP3A5  
HMOX1  
EPO  
MIR155  
IL18  
POLG  
S100B  
MPO  
PRNP  
LTA  
ACTB  
IL1A  
CETP  
ZMPSTE24  
PDE5A  
HSPA1A  
MYH6  
PTGS1  
RTN4  
GFAP  
APOC3  
ECE1  
G6PD

LEP  
LIPC  
BGN  
RBFOX3  
NOS2  
PKD1  
NOTCH1  
NOS1  
EPHX2  
KRAS  
PROC  
NF1  
TNFRSF11B  
SLC6A4  
HLA-DRB1  
HP  
CALCA  
ALDH2  
NPY  
CDKN2A  
F11  
CYP11B2  
PITX2  
FLVCR2  
NCF1  
AGER  
LOC113939944  
CP  
AMPD1  
FGG  
HDAC9  
MIR146A  
GDF15  
GNAQ  
KRIT1  
DES  
CCR2  
PDE3A  
BRCA2  
NGF  
KCNJ5  
ATM  
WFS1  
CSF3

TBX20  
HLA-DQB1  
CYP2C9  
MMACHC  
ZFHX3  
ADRB1  
APOA5  
GCKR  
CYBA  
C3  
CCR5  
KDR  
CAPN3  
DPM3  
GPT  
TTN  
HFE  
FLT1  
CNTF  
CTF1  
GRIN2A  
MTX2  
MYMY1  
MYMY3  
CITED2  
CCND1  
JAG1  
SRFBP1  
VDR  
NR3C1  
PCSK9  
ABCB1  
TCF7L2  
MMUT  
MEN1  
CD34  
CTLA4  
TIMP1  
COL2A1  
UCP2  
PRL  
TMEM126B  
INSL6  
PRKAG2

HLA-B  
SELL  
GNB1  
FLNA  
RPS27A  
KL  
CYP4F2  
CUX2  
NINJ2  
NSD1  
CSF2  
FLNC  
PTPN11  
MYMY4  
PPARA  
MMP1  
FCGR2A  
GRIN2B  
ACHE  
MAN2B1  
GJA5  
CPS1  
COL4A5  
NLRP3  
NPR3  
CDK5  
IL17A  
CPB2  
XDH  
CDKN2B  
HTR2A  
ACAN  
XBP1  
FKRP  
PTX3  
CAT  
TANGO2  
GSTM1  
CYP2J2  
CX3CR1  
SLC34A1  
TWNK  
ATP1B1  
SERPINA1

ATP1A2  
FH  
SMARCA4  
PARP1  
GHRL  
TLL1  
TF  
POU4F1  
PKD2  
CELA2A  
PDGFRA  
ITIH4  
CCL11  
MBL2  
MT-ATP8  
BGLAP  
LTC4S  
MTR  
HYT1  
HNF1A  
HSPA5  
GRN  
VHL  
NEFL  
IL2  
MIR132  
MMP12  
SCNN1A  
RGS5  
HYT2  
HYT3  
HYT4  
HYT5  
HYT6  
HYT7  
HYT8  
TBX5  
MIR145  
MIR9-1  
BRAF  
MYL4  
CD40  
IGFBP3  
OTC

IL13  
FAS  
TBXAS1  
IL1R1  
ACE2  
SLC1A1  
ABCC8  
ABO  
MAPK14  
BCL2  
CS  
PPOX  
GBA  
TLR2  
ERCC6  
IL6R  
IAPP  
FOS  
SMARCAL1  
LRP1  
MGP  
SURF1  
PCNT  
IL4R  
TFPI  
CD36  
DKK1  
CFH  
OPN4  
LGALS3  
NAMPT  
ITGB2  
MIR126  
NDUFS4  
PDGFRB  
FABP4  
CASP2  
CYP4A11  
C5  
GJA4  
SYNGAP1  
MAPK1  
MIF  
GARS1

TREM2  
LIMK1  
STAT3  
SELPLG  
BCL2L1  
COL1A1  
TGFB3  
MYH9  
ITGAM  
ANGPT2  
ELANE  
CRELD1  
SORT1  
CYP2C8  
SLC9A1  
LCN2  
CHAT  
CAV1  
POMC  
ADA  
ABCC9  
RYS1  
GATA3  
RBP4  
KCNE2  
COG2  
H19  
ACTG1  
ADRB3  
TARDBP  
TNFSF4  
COX5B  
PTH  
AHSG  
SNCA  
SLC2A1  
MFN2  
SCN2A  
CLCN1  
DNAH8  
IRS1  
ANGPTL6  
MTERF1  
ITGB1

PHACTR1  
CTNNB1  
FABP2  
ASS1  
EGF  
ARSA  
FGF21  
MIR210  
FLNC-AS1  
MC4R  
VCP  
IFNG  
MYD88  
KCNA5  
SLC1A3  
NOTCH2  
PCCA  
PTPN22  
IRF5  
BMP2  
SCN1A  
FN1  
CCR6  
XIAP  
EPRS1  
ARRDC4  
COMT  
BMP6  
GDF2  
TPM1  
CD163  
FMR1  
ARG1  
F13B  
TSPAN2  
WDR26  
YY1AP1  
ASTN2  
LOC110806262  
B2M  
CORIN  
KMO  
HTR3A  
SAMHD1

PGF  
MGR5  
MGR6  
GH1  
KALRN  
NRP1  
ODC1  
SST  
NR2F2  
CLU  
ASIC1  
THSD1  
SRC  
SETD2  
FCGR3B  
MMP8  
SPG7  
TFAM  
CYP3A4  
GRIA1  
SDHB  
MIR143  
LIPA  
PARK7  
CPT2  
HTR1A  
CD63  
GRIN1  
CNR1  
CHI3L1  
TEK  
DRD1  
CHIT1  
UQCRFS1  
IL5RA  
LEPR  
MT-ND3  
FURIN  
NR3C2  
CRYAB  
FGF23  
MGR2  
MGR3  
MGR8

MGR1  
MGR10  
MGR11  
MGR12  
ALG13  
NTS  
KLKB1  
MT-ND2  
NDUFA1  
GCG  
PCCB  
TIMP3  
GYS1  
RNLS  
KCNMA1  
PNP  
COX4I1  
TERT  
PAPPA  
HSD11B2  
SCNN1B  
MEFV  
BAD  
LOC106029312  
IRS2  
CDH5  
IL9  
PIGA  
NAGS  
IGF2BP2  
ATXN2  
SCGB1A1  
ATFB5  
WDR45  
MIR451A  
APLNR  
MT-ND4L  
GPX3  
UCP3  
DMD  
MIR499A  
MTAP  
CMA1  
MIR149

MIR30A  
KCNJ11  
NT5E  
HABP2  
MIR122  
KYN  
CELSR1  
CYP1A1  
JUN  
GGCX  
MIR223  
SGK1  
TYR  
CYP17A1  
NTN1  
MIR144  
XRCC1  
MROS  
ERCC8  
HGF  
PRKN  
THBS1  
IMPA2  
KITLG  
SLC17A5  
LAMP2  
CCN2  
KIT  
IGFBP1  
LIF  
MMP7  
MDM2  
APOL1  
GCH1  
IRAK1  
MASP2  
PON3  
ITLN1  
WRN  
TAC1  
KARS1  
ADAM17  
SLC2A4  
C4B

RAI1  
GC  
MEG3  
TYMP  
CCR3  
FOXP2  
MIR196A2  
IL37  
MIR181A1  
FABP3  
S100A1  
WNK1  
ITGAL  
ACP5  
CCL5  
PPARGC1A  
HSPB1  
IL3  
KCNK17  
ALOX12  
MAPK8  
TIMP2  
PTK2B  
FTO  
NUP155  
TRPV4  
GGT1  
PVALB  
CLCN6  
LOC106627981  
TNFRSF1B  
WARS2  
TFB1M  
DNAH5  
CCDC88C  
DDAH1  
INSR  
ESR2  
ROCK1  
GHR  
SLCO1C1  
TWIST1  
MTOR  
CYP11B1

SOST  
NR4A2  
GAA  
NEFH  
CD68  
SHBG  
H2AC18  
IGF1R  
CYP1B1  
KIF6  
GRIK2  
C4A  
AR  
SLC19A1  
ADAMTS7  
MIRLET7B  
IDO1  
DRD2  
ALPL  
TXN  
MIR199A1  
ALOX15  
STX1A  
AIFM1  
MIR29A  
GAPDH  
NR1H3  
KCNB1  
HAVCR1  
JPH3  
SPTB  
NOTCH4  
SOCS1  
PIGQ  
MS4A2  
GPX1  
SUOX  
NPC1  
MMP10  
VIPR2  
BDKRB2  
IL33  
DLL4  
CACNA1C

CDH13  
ADAMTSL1  
APOA4  
SLC6A3  
TIE1  
LEPQTL1  
GCK  
FNDC5  
BRAP  
VASP  
SREBF1  
CFLAR  
ADCYAP1  
ABCG2  
DLL1  
CD79A  
RBPJ  
TCF7  
GNAS  
CAMK2G  
DLG4  
PTGDS  
RYS2  
CIITA  
MTTP  
GSTT1  
PLA2G2A  
PSMA6  
CDH11  
ATP1A3  
AFG3L2  
CYBB  
ABCG8  
EGR1  
P2RY1  
SCN8A  
SLCO1B1  
TNFSF11  
PTHLH  
PMM1  
CHGA  
MIR134  
PDGFB  
SQSTM1

TRPV1  
OPRM1  
NOX4  
BAX  
PTPN1  
TRIM2  
MME  
CCK  
AKR1B1  
SOD3  
SELENOS  
ABCG1  
KIAA0319L  
LTB  
TRPM7  
IFNA1  
DLL3  
SRRT  
CALM1  
STAT5A  
STIN2-VNTR  
RUNX2  
ABCC1  
GRM7  
DBH  
CX3CL1  
IL12A  
CASP8  
GRM1  
IL2RA  
PSEN2  
PLOD1  
UGT1A1  
FOLH1  
ADH1C  
LTA4H  
HEY1  
JAG2  
HEYL  
CYP2D6  
EPHB4  
EP300  
IFIH1  
MMP13

MIR34A  
MTRR  
CELF2  
NAGLU  
MUC1  
CHRNA7  
CACNA1A  
PATJ  
MYT1L  
MIR140  
ADRA2A  
DENND11  
SAA1  
PTGES  
DYRK1A  
MIR221  
CDH4  
MMRN1  
SLC2A3  
MIR124-1  
GAS6  
HNF1B  
TNXB  
BCHE  
APEX1  
MAOA  
NDUFC2  
SREBF2  
COL1A2  
ZC3HC1  
BECN1  
BMPR1A  
HSD11B1  
RUVBL2  
LLGL2  
APLN  
GRIA2  
MIR125B1  
ERCC4  
MYC  
SLC8A1  
PSAP  
CALCRL  
SP1

MIR125A  
ALKBH8  
CD28  
IDH1  
CD177  
IGF2  
ASIC3  
KCNN4  
GSTO1  
TNFSF10  
LGALS2  
CALB1  
MIR142  
C19orf12  
S1PR1  
ABCB7  
HRAS  
HTT  
CTSB  
CYP24A1  
DEFA1  
ROS1  
MEF2D  
SIL1  
KCNMB1  
CD4  
DNAH11  
DDC  
EZH2  
NTRK2  
H2AX  
STAT5B  
PALLD  
VAMP8  
SCNN1G  
APOD  
MYH15  
SNX19  
ICAM4  
ADRA2B  
LMX1B  
IL1F10  
CSF1  
GRM8

COL6A3  
IRF1  
PRKAA2  
HAMP  
GSTO2  
NTRK1  
STAT4  
PPARD  
TRIB1  
SERPINA12  
NQO1  
MIR24-1  
HSPD1  
AKT2  
GATA5  
ERAP1  
HSPA1B  
EGLN1  
OPA1  
TLR3  
MVK  
LRP5  
NPR1  
CCL17  
EPAS1  
AUTS2  
GRK2  
CCR1  
KLC1  
MIR188  
SLC25A4  
ATP2B3  
GSN  
ST2  
KCNQ2  
RAC1  
CXCL16  
CLEC16A  
KCNK4  
MIR150  
LAMA1  
NRG1  
EIF2AK2  
CSTB

ALDH1A2  
CRH  
VIP  
PROS1  
MIR30E  
SUPT3H  
ITPR3  
IDE  
UMOD  
NFKB1  
PSRC1  
LEMD3  
PLAUR  
AQP1  
KLK1  
IL11  
FABP12  
TLR8  
PRTN3  
HRES1  
TTC7B  
AP3B1  
TRAF3  
MIR17  
RUNX1  
FADS1  
GHRH  
HLA-DRA  
DSP  
ADAMTS1  
ARHGEF10  
NGFR  
ADCYAP1R1  
KCNQ3  
TNFSF12  
ZCCHC14  
PDGFD  
DCN  
BLK  
ITGB6  
SERPINA9  
HNF4A  
MLYCD  
ITGA4

FGFR1  
HPS1  
MAPK10  
UBR3  
FOXF2  
USF1  
PRCP  
APIP  
STK11  
FASLG  
MAPK8IP1  
DPP4  
HOTAIR  
HHT3  
KCNIP4  
LBP  
ANGPTL4  
CXCR2  
FUNDG2  
SLC9A3R2  
SMPD1  
TCF21  
HSPG2  
CAMTA1  
TRAPPC9  
EPA3  
GCLC  
NOD2  
ANGPTL3  
RARRES2  
BCAN  
MGAT5  
SPATA13  
RHOA  
CSF1R  
DAPK1  
PCDH19  
TRH  
UCL1  
ZNF292  
GRM5  
CSF3R  
APOA2  
PFKM

MKI67  
CD59  
S100A9  
MMAA  
ALDH7A1  
SPSB4  
GAL  
SLC22A3  
MAG  
STN1  
HPSE  
CELSR2  
TBX3  
ITM2B  
CRYBG1  
OXT  
VEGFC  
DRD4  
PDGFA  
FLG  
CACNA1B  
KCNK3  
CYBRD1  
CHRNA4  
LOC110673971  
MAOB  
ADAMTS2  
APCS  
FOXG1  
TSC2  
WNT3  
CARD8  
LCAT  
PKP2  
TLR7  
PIK3CG  
MIR195  
GSTP1  
VIM  
SCGN  
NFAT5  
CARD14  
MON1B  
BMPR2

ATG7  
ROPN1  
PTPRC  
EDN3  
NAA25  
SNHG14  
ZPR1  
STRN  
MIRLET7I  
DOCK8  
CAPN10  
S100A8  
HSPA1L  
COL4A4  
CSN3  
TYRO3  
DFFA  
GRIA3  
CYP2E1  
SRSF3  
LTB4R  
ANK2  
IL16  
ASPM  
HTR2C  
SYNPO  
ZC3H12A  
COL5A1  
CLCN2  
EGFR  
PRKCG  
ADRA2C  
NCAM1  
SLC5A2  
CHUK  
ALDH1L1  
GUSB  
WDR12  
KMT2A  
GLUD2  
MOCS2  
NUDC  
KLF4  
SYP

SOCS3  
MTHFS  
SUN1  
OXA1L  
IGFBP2  
PLA2G6  
LPAL2  
SPTBN5  
OPTN  
CST9L  
CST8  
IL5  
PRRT2  
MIR33A  
AMBP  
MIR125B2  
CYP19A1  
LPXN  
VDAC1  
TAGLN  
CXCL1  
CDC5L  
TNIP1  
ADK  
CNNM2  
ETS1  
MMAB  
PPP3CA  
ACPI  
ADCY10  
CACNB2  
ENPEP  
IL1RL1  
CD8A  
PNPO  
ROCK2  
APAF1  
TUBB3  
TIMD4  
IBSP  
HCRT  
SPTAN1  
LDB3  
CREBBP

LINC01394  
TTF2  
OSM  
PAWR  
MIR206  
GZMB  
GFER  
MIR29C  
PEAR1  
TERC  
C3AR1  
AMPD3  
FADS2  
FXN  
MIR130A  
ACYP2  
NRIP2  
UFSP2  
TNFAIP3  
FST  
TNFRSF11A  
FCN1  
NKX2-1  
ITGAV  
BIRC5  
NEAT1  
ITGAE  
HSPB2  
WNK3  
XKR6  
P2RX7  
PRKCE  
UGCG  
SMARCA2  
ABCD2  
CDK4  
PEMT  
CTSK  
POMT2  
COL5A2  
ADRA1A  
CR2  
MIR130B  
NFATC1

MTHFD1  
SLC6A2  
PAFAH1B1  
LOC102724058  
TJP1  
RASD1  
PLPP3  
NPPC  
PRKCA  
TOX  
NT5C2  
FAM205A  
FHIP1A  
ADNP  
ADAMTS18  
FCGR2B  
GDAP1  
FCAR  
VEGFB  
RPS6KA3  
SLC39A7  
AQP10  
TAS2R50  
NFKBIA  
CKB  
CKM  
EPHA4  
IL20  
KRT5  
DCC  
ALOX12B  
MLF1  
SERPINB8  
P2RX6  
SLC26A8  
TAF3  
VTI1A  
MCM10  
KRT74  
PGLYRP2  
DMXL2  
FCRLB  
FSTL4  
SGIP1

HEATR5B  
TMPRSS11B  
WDR31  
MYOM3  
ZNF132  
OR13G1  
OR2A25  
WDR55  
LGALS14  
LY6G5B  
RPLP0P4  
ITGA3  
NPTX1  
DEFB4A  
SOX9  
LBR  
TCN2  
IVD  
ZFP30  
GAS5-AS1  
ICOSLG  
PANK2  
PRDM16  
OGG1  
SLC2A6  
CXCL10  
NF2  
UCP1  
HSPB8  
GJB1  
SCARB1  
RAMP2  
MEF2C  
GCLM  
RASIP1  
STAT1  
CTSD  
TNC  
GALC  
RPS6KA2  
PPIG  
P2RX4  
TSHR  
M6PR

APOC1  
HPX  
SLPI  
TFRC  
COX5A  
ITPR1  
MIR124-3  
IDH2  
GAP43  
PRKAA1  
GATA1  
SLC12A1  
ARG2  
CXCR3  
PENK  
PNOC  
PHF6  
PTPRF  
CGAS  
SOAT1  
MYOCD  
LAMA3  
GRIK1  
P4HB  
CDKN3  
ADIPOR2  
NPHS2  
IL36RN  
KRT14  
MYL3  
MED13L  
MIR602  
SAA4  
PMS2  
HYOU1  
ARL6IP6  
AQP9  
KIF5A  
DAXX  
GOSR2  
GUCY1B1  
CFTR  
ABL1  
IFNA2

VSTM4  
RASA1  
PDP1  
ARID1B  
HLA-DQA1  
HADHA  
CYP11A1  
HK1  
LTF  
PRDX1  
VTN  
FABP1  
DCTN1  
BCL2L1  
DNASE1  
PLAU  
SNAP25  
SLC4A4  
SLC17A3  
APOM  
TTLL5  
ERRFI1  
SHISA6  
TMEM163  
ZDHHC22  
OBI1  
LINC02113  
MRAS  
HDAC4  
FOXO1  
DIAPH1  
DDAH2  
NFIA  
PINK1  
U2AF1  
OPRD1  
SIGMAR1  
CHEK2  
SFTPA1  
CD86  
GOLGB1  
HAVCR2  
FOSB  
KRT20

DNMT3A  
MIR27A  
IL21  
ATP10A  
APOC2  
CFHR5  
MIR382  
RELA  
MIR100  
TNFRSF9  
MIR185  
MIR15A  
SLC1A7  
CCL7  
SMN1  
RB1  
MSX2  
MIR495  
TAF1  
CAV3  
C11orf65  
CFI  
SLC12A2  
TGM2  
PARP12  
GPATCH8  
TMCO6  
CA2  
RAMP1  
BLOC1S1  
GAD2  
NLGN1  
CRYAA  
CARTPT  
LAMP1  
GNMT  
BRCA1  
TRPC6  
NTNG1  
ITPK1  
SLC20A2  
SOCS2  
TRPC3  
CYP2B6

MIR16-1  
GP5  
AFF2  
HSP90AA1  
GAST  
TCF4  
NDUFA6  
MIR200B  
ITGA5  
ADORA2B  
IL23R  
NEDD4  
TNR  
DFFB  
BACE2  
GLUL  
RBFOX1  
PRKCB  
RMST  
HPR  
UCN  
CAMK2A  
MIR326  
TPO  
HTR2B  
CA4  
NLRP1  
PGM1  
PCNA  
HBG2  
PLIN1  
ULK4  
UTS2  
CYP1A2  
DPAGT1  
GSK3B  
MIR29B1  
CUBN  
FUT2  
TCN1  
NBPF3  
HMGCL  
CARF  
SEMA3F

BMP4  
GP9  
ENPP3  
PTCH1  
PRKAR1A  
LTB4R2  
TRADD  
CASP7  
WARS1  
ATP2B1  
CYSLTR2  
KRT18  
LOC110973015  
ASXL1  
NFE2  
CRLF3  
DIO3  
TNFSF14  
PRRC2A  
STUB1  
CANT1  
LTBP2  
WNK4  
RNASE3  
NNMT  
CDC42  
IL21R  
HJV  
OPRK1  
MIR27B  
MARS1  
ADIPOR1  
FES  
PDE4DIP  
ACOT4  
TRIM29  
TPPP3  
CDK5R1  
PROM1  
PLA2G1B  
BTD  
GAD1  
CASR  
YWHAQ

CHD3  
NEUROG3  
DPH1  
CES1  
FGF1  
KLF5  
SLC22A7  
EIF1AY  
IL18R1  
SEMA4A  
KLRC4  
UBAC2  
IL12A-AS1  
CTH  
TRIM9  
AP4M1  
ENO1  
BDKRB1  
AGXT2  
ERN1  
TGFA  
NTN4  
RAPGEF3  
SCN10A  
MIR214  
CLDN5  
BIN1  
NRGN  
AHSP  
HOMER1  
HOMER2  
LMNB2  
SLC4A1  
MIR599  
ACSS1  
TLR5  
HTR4  
TRAF6  
FGF14  
MCF2L  
ORM1  
ENOX1  
CFHR4  
ZBTB41

LINC02145  
DNAJC6  
CPLX2  
WDR37  
THY1  
MAPK9  
TRAPPC11  
PCSK2  
SIRT6  
CAPN1  
MSTN  
SDHA  
CMC4  
SLC6A8  
AARS1  
PPP1R1B  
USP36  
MIR30D  
NSF  
MIR200C  
PLTP  
MIR212  
F2RL2  
NOX1  
HRH3  
MX1  
NPY1R  
RTN4R  
SLC9A3  
FADD  
RNF146  
STT3B  
IL1RAPL2  
COX14  
PLA2G3  
CALCR  
MIR199A2  
SORCS2  
CXCL2  
SIRT2  
MIR4437  
GRK3  
SNRNP70  
CCL18

PDE4A  
SRGAP3  
DPP10  
RUFY1  
CAPN2  
PSMB9  
MYBPC1  
SLC2A9  
DPYSL2  
PDYN  
PMF1  
PMF1-BGLAP  
PDGFC  
DKK3  
SERPINA5  
IL2RB  
SYNE1  
PYGB  
PSPH  
VSNL1  
PNMT  
ATP13A2  
SLC25A37  
MAPKAPK5  
HECTD4  
PHETA1  
TMEM116  
ADAM1A  
PCNPP1  
lnc-FAM109A-1  
HSALNG0094037  
RF00017-1164  
HSALNG0094038  
piR-48007  
piR-51327  
piR-36455  
piR-38259  
piR-50346  
piR-51449  
piR-56480-015  
SLC13A5  
TFAP2A  
IGF2R  
ARNT

FMO3  
DNM1  
DUSP2  
PYGM  
GABBR1  
CAV2  
LMNB1  
TAB2  
NPY5R  
DDIT4  
TSPYL6  
MIR503  
HBA2  
ATP12A  
ATP4A  
MACROD2  
ATP6AP2  
CCN1  
CTBP1  
PTPRN2  
TP73  
NCOR2  
EIF2AK1  
LZTR1  
AKAP12  
SBF1  
ACOT7  
TAF4  
PACS2  
ARVCF  
BAK1  
FGFR4  
CDKN1A  
KIF16B  
CACNA1D  
OBSCN  
COMP  
NPHS1  
PLCB2  
SAG  
TLK1  
ZNF208  
DECR1  
MIR4271

CTNNA1  
CXCR5  
MERTK  
PSMB7  
CD74  
AFP  
PTCSC3  
SDC1  
P2RX2  
ZNF318  
OSMR  
DMRTA1  
MED22  
SURF6  
HGS  
CR1  
EFEMP2  
MIR208A  
DNM1L  
BLM  
HAAO  
PLAA  
CGA  
FAF1  
RILP  
ELMOD1  
TSPEAR  
ATPSCKMT  
LOC100507346  
MIR133B  
SCT  
HSP90B1  
ADRA1B  
FBLN5  
ENDOG  
C1orf167  
CNR2  
MANF  
EMD  
NOD1  
MIR1275  
MIR422A  
CYP2R1  
SORD

DVL1  
ILF3  
HSF1  
SERPINA7  
CBL  
PRKCZ  
LRPAP1  
C1QA  
ANK3  
IFNB1  
HRH2  
PTPRD  
HTR3B  
PICALM  
VPS11  
MOBP  
MIR616  
PSMD9  
MET  
KCNJ1  
CST2  
SIRT3  
DYNC2H1  
SUN2  
MAP2K4  
IL20RB  
ALCAM  
ATF6  
NPC2  
HADH  
LACTB  
TYK2  
S100P  
SPARCL1  
TIPARP  
PRPF8  
CD46  
TMEM132D  
TCF12  
SLC44A2  
GRM2  
MIR340  
PHF1  
SCUBE1

RPL7A  
SH3PXD2A  
SURF4  
CASZ1  
PMFBP1  
SURF2  
TTBK1  
C1orf127  
C16orf95  
SNORD24  
SNORD36A  
SNORD36B  
SNORD36C  
F11-AS1  
LOC100505841  
LINC01304  
LINC01438  
RPL21P81  
ENSG00000201451  
RNU6-144P  
ENSG00000277653  
lnc-TWIST1-1  
ZYXP1  
HSALNG00000800  
lnc-JPH3-1  
lnc-JPH3-6  
HSALNG0070392-001  
RF00017-7527  
RF00951-004  
MN297386  
HSALNG0050175  
piR-58308-245  
piR-41525-616  
piR-59149  
piR-31534-613  
MAP1B  
HVCN1  
SYNE2  
CRAT  
GATM  
ANKS1A  
DEFB1  
NPL  
RNASE2

CILP2  
MAFB  
PTGER4  
IL10RA  
HSPB6  
RGS2  
CHRNA3  
MIR22  
MYL2  
KCNJ16  
XYLB  
MATN3  
MIR24-2  
CBX5  
LTBP4  
PRKDC  
PRPS1  
TP53BP1  
NAGA  
BANF1  
MIR124-2  
FUT8  
SLC37A4  
VPS33B  
GALNT17  
DENND2B  
REST  
EDN2  
SMG6  
DNM1P37  
RPTOR  
TRAPPC4  
RAB8A  
SBF2  
FBXO38  
TECRL  
SSPN  
CXCL11  
ACTA1  
PANX1  
NPR2  
BRD4  
TRA2B  
ADGRL3

TRPM2  
CSRP3  
MIR191  
GLDC  
SGCA  
HMBS  
THUMPD3-AS1  
ACVR1  
WT1  
TFEB  
TOMM40  
ACADVL  
IRAG1  
BCR  
LRP6  
MIR199B  
PXDN  
ANG  
NDRG1  
MOCS1  
MIR375  
CALHM1  
LGALS1  
HPS4  
NEURL1  
CPNE8  
COL28A1  
OBP2B  
CCNH  
FOXP3  
IL12B  
SCN9A  
HMOX2  
CAST  
CPOX  
IL15  
ALDH1L1-AS2  
SLIT2  
HLA-DRB4  
MS4A1  
FUCA1  
XPA  
AGA  
A4GALT

TRPA1  
TSPAN9  
CHKA  
SHOC2  
STK24  
FYN  
MTFMT  
RAB39B  
MIR148B  
MIR29B2  
MIR151B  
RTEL1  
ZEB1  
MCCC2  
TOLLIP  
SLC7A8  
CCT2  
AP3D1  
FAM13A  
ZNF618  
MIR320A  
DIO1  
MIR483  
IL10RB  
CHRNA4  
MIR93  
TNFAIP8L2  
MAP3K11  
MYLK-AS1  
LINC01389  
HLA-A  
MIR192  
PRKCQ  
ROR2  
DOCK1  
POLR1D  
PSMB4  
PML  
NDST1  
CDH15  
PSMA4  
TFF1  
COLEC11  
FOXF1

MAPKAP1  
UBE2R2  
NADSYN1  
COL13A1  
FUT7  
PPP1R12B  
PIGG  
PITRM1  
MCC  
NUP210  
TBCD  
UHRF1  
USP20  
RGS12  
WNK2  
ERGIC1  
GAS7  
NVL  
SIX5  
DIDO1  
ITM2C  
ZNF79  
PANX2  
OGDHL  
SS18L1  
TCF25  
USP37  
SPTBN4  
COL23A1  
CUL9  
CDYL2  
ADAMTSL5  
OSGIN1  
SDK1  
ZNF607  
MYO7B  
MEGF11  
RABGAP1L  
CCDC86  
GPR160  
PNLDC1  
DIP2C  
TMEM39A  
RAB6C

ZC3H3  
ZSWIM2  
TRPC1  
SMAD9  
ZIC3  
SFTPD  
KCNN3  
TKT  
HNRNPK  
SGPL1  
CAPZA2  
CD55  
AKR1D1  
SOX5  
SKI  
PEX1  
ARID1A  
NDUFS6  
FXR1  
PIGV  
PEX10  
SEMA3C  
CARS2  
DNAJC19  
NRCAM  
DNAJB11  
CNTN6  
TTC8  
SORBS2  
CADPS2  
HNRNPA3  
DEFA3  
CRTAC1  
EPG5  
KCTD13  
RER1  
SBF2-AS1  
MIR4497  
MIR181B1  
MIR181B2  
NUDT6  
ABCC3  
PCDHGA3  
MIR17HG

MIR335  
KIF26B  
CTC1  
ATP1A1  
LGALS13  
MOG  
PSMC3  
SLC8A3  
NEDD4L  
LGMN  
SHH  
KLF2  
HCRTR2  
DNMT1  
JUNB  
MIR30B  
CDK6  
FANCC  
CDKN2C  
LATS2  
LRAT  
DAB1  
WNT2B  
DGKG  
RXFP2  
RAD18  
TSHB  
PTPRG  
COX7A2L  
CRYGS  
SC5D  
EML4  
GATAD1  
KCNG3  
TECTA  
A1CF  
DDX31  
CGNL1  
PPFIBP2  
TSPAN15  
ZNF354A  
CNTNAP4  
NAALADL2  
TMEM14C

SYT9  
LRCH1  
DMRTA2  
LHFPL3  
PHACTR2  
THUMPD3  
CACFD1  
SLC35F6  
SRRM4  
ZNF354B  
ASPHD2  
OLFML1  
CIB4  
LTV1  
FAM133B  
ADTRP  
MRPL57  
ZNF354C  
ZC2HC1B  
MEDAG  
FAM170B  
TMEM170B  
ZNF879  
TEX26  
C1orf185  
TMEM273  
TRA  
LINC00545  
TEX26-AS1  
LINC00462  
FAM170B-AS1  
LINC00398  
AACSP1  
CRYBB2P1  
LINC01435  
CDK6-AS1  
MIR548AD  
MIPEPP3  
MIR297  
MIR3156-3  
PHACTR2-AS1  
LINC02052  
LINC01657  
TBCEL-TECTA

SRGAP3-AS1  
THRAP3P1  
LINC01765  
RPS3AP5  
UBE2L2  
RPS12P23  
ENSG00000197099  
RNU6-667P  
STARP1  
RN7SL363P  
ENSG00000250999  
ENSG00000225378  
ENSG00000266993  
ESRRAP2  
GTF2IP2  
LGMNP1  
PPIAP22  
LOC105372028  
ENSG00000271897  
BOLA3P1  
GAPDHP50  
ICE2P2  
RNU7-159P  
RCN1P1  
HSALNG0070397  
ENSG00000287593  
lnc-ALDH1A2-9  
MIR378G-002  
ENSG00000257065  
ATP5MC1P8  
NDUFB10P1  
HSALNG0006261  
HSALNG0113824  
lnc-ABO-33  
lnc-ZFP2-1  
lnc-FAM170B-1  
lnc-FURIN-3  
lnc-MTAP-3  
HSALNG0089738  
HSALNG0096147  
lnc-CDKN2C-1  
lnc-FAM133B-2  
lnc-TMEM170B-5  
RF00017-1273

NONHSAG020469.2  
RF00017-4863  
MTND4P33  
MIX23P2  
HSALNG0013736  
HSALNG0003544  
HSALNG0106222  
HSALNG0108163  
HSALNG0108164-001  
lnc-COX7A2L-1  
lnc-AQP9-4  
HSALNG0048081  
HSALNG0048080-001  
HSALNG0108164-002  
piR-44878-030  
lnc-EML4-10  
lnc-FANCC-4  
piR-45932-090  
piR-59515-001  
piR-59907-030  
HSALNG0077864-002  
lnc-CTTNBP2NL-4  
RF00017-5985  
RF01016-016  
TARDBPP5  
HSALNG0024006  
HSALNG0123985  
HSALNG0113827  
piR-40216-002  
piR-51980  
lnc-KRTAP12-4-1  
piR-39341-075  
piR-49334  
piR-58579  
piR-31534-476  
HSALNG0003920  
HSALNG0003921  
HSALNG0003922  
HSALNG0123953  
piR-45012-007  
DDIT3  
TNKS  
KLF15  
CPT1A

RFC1  
ERCC1  
LPAR3  
RAN  
ICMT  
TWIST2  
UBA7  
NUP153  
NAT10  
CLMP  
RCE1  
SYNE3  
SLC5A6  
CD200  
LY96  
CAVIN2  
MMP14  
GCGR  
DRD3  
MIR423  
FAAH  
PPP1R12A  
NOL3  
BNIP3  
ELAVL1  
MADD  
IGFBP4  
DOCK7  
IL17RC  
BCO2  
MIR4669  
SLC24A3  
OPCML  
FABP7  
INF2  
AQP2  
STK39  
ARNTL  
MIR222  
KLHL3  
CRABP1  
TRIM31  
UBE2W  
ZXDC

C6orf58  
ANKRD13D  
FGFBP2  
KHDC1  
CCER2  
CEP295NL  
DEFB133  
LINC00316  
MIR124-2HG  
MIR3679  
LINC00351  
MIR6165  
MFN1  
SLK  
CACNA1S  
TBX1  
PCDH7  
NT5C1B  
ABAT  
SVIL  
LNPEP  
CCL4  
GNS  
PEX16  
PAGR1  
ATL1  
PAH  
TRIM21  
CEACAM1  
CCL26  
IRF2BP2  
MMADHC  
MIR26B  
AVPR2  
TACR1  
TBL3  
GPR135  
SLC12A3  
P2RX3  
ATP1A4  
DDR2  
FLRT2  
RP1  
AGBL1

VLDLR  
HLA-DPB1  
RELB  
G6PC1  
KCNK2  
RIPK3  
TOP1  
ARSB  
ADD3  
CSPG4  
RECK  
CSTA  
CST6  
CST5  
CST7  
CST4  
CRLS1  
FIP1L1  
TSPAN16  
EIF4A2  
PTGER3  
RCAN1  
INPP5D  
PDIA2  
MAPK13  
TPM4  
SLC35F3  
FLVCR1  
SLC25A38  
NR4A1  
RO60  
SCN4A  
MED23  
GNAI1  
NOX5  
TRPM8  
MIR23B  
BCKDHB  
CACNA1H  
GRK4  
ADD2  
CD44  
MAP1LC3A  
VCL

HOXD13  
HTR1B  
OGA  
ARTN  
SLC25A14  
TXNIP  
SEPTIN9  
LARGE2  
CCL20  
MIR216A  
ADAM12  
SFN  
COL14A1  
ADAMTS3  
AIM2  
ARNT2  
KCNK1  
SLC14A2  
NDUFV3  
IRX1  
TMX1  
STARD3NL  
PF4V1  
CCDC39  
CHORDC1  
AJAP1  
RPL7P45  
PYY  
CAMKK2  
HLCS  
SMTN  
RHOD  
PPP1CA  
NCF2  
TPH1  
DUOX2  
RENBP  
BSG  
GNRH1  
NAIP  
TRPC5  
EGFL7  
ANKH  
ERBB2

QRSL1  
MAF  
CLCNKB  
PRSS8  
KLK4  
GAS5  
MIR590  
MIR296  
MIR92B  
MIR20A  
KEAP1  
CANX  
FLOT1  
ISL1  
PEA15  
PDE3B  
IKBKG  
ATF2  
SERPINF1  
PLA2G10  
ADM2  
PRDX5  
SCG2  
TLR6  
STIP1  
CALB2  
RPS6KA1  
ACADSB  
BCKDK  
TFAP2B  
FBL  
HIBCH  
HTRA2  
FKBP1A  
UTS2R  
ADRA1D  
SLC22A12  
SCN11A  
LIPN  
MIR520A  
CBSL  
TRAP1  
GCDH  
CACNB4

KCNA1  
CYP27B1  
EPHX1  
FAIM2  
HADHB  
STC1  
PLOC2  
MCEE  
SLC2A13  
ABCB11  
OXTR  
SLC7A7  
ANK1  
IDUA  
MGAM  
SIK2  
DUSP19  
SEMA3E  
KAT2B  
PLCB4  
DDX6  
WEE1  
FZD1  
PIK3C2G  
RHAG  
DHX38  
SLC36A2  
STK38  
SLC14A1  
TNFRSF21  
ATP6V1G3  
EIF4A3  
GDA  
PDE9A  
SFRP4  
PTPRT  
UAP1  
AKAP8  
CYTH1  
ARCN1  
CPD  
EED  
PSMB3  
KCNS3

RFC4  
RNF8  
WNT9B  
CRISP2  
GDI2  
POP1  
MKRN1  
NCAM2  
USP28  
RPH3A  
SWAP70  
AMBN  
CXCL6  
FRMD6  
NPLOC4  
PLCH2  
ZNF143  
DEFA5  
FCRL5  
ENAM  
HOXD8  
HMGN2  
FOXP4  
NAALAD2  
NLRP5  
MYRIP  
OSBPL1A  
NAPB  
RPS25  
SLC26A11  
WDR4  
TMOD4  
USP46  
ANO2  
CCL1  
DEFA4  
ARHGAP21  
CTR9  
IRX2  
NTPCR  
SDR16C5  
SLC37A3  
PRCC  
ADAMTSL3

BRPF3  
ETV7  
COPS8  
FGD6  
GLTP  
ZNF77  
PGLYRP3  
PI16  
MPHOSPH6  
PHLDB1  
UPK2  
ONECUT2  
SPINK7  
TMEM132E  
VAT1L  
ETV3  
FOXR1  
HOXD1  
HINFP  
PDZRN4  
NRIP3  
USP38  
RNF26  
CCDC59  
DTWD1  
CMTR1  
BCL9L  
CEP131  
ZNHIT6  
NIPAL2  
TBCCD1  
SIGLEC15  
WIZ  
RASAL3  
ZNF333  
AGMO  
C6orf89  
C2CD2L  
GPATCH3  
ZNF516  
PDCD11  
SPATA18  
NYNRIN  
TMEM51

TMEM74  
PRDM15  
RNF17  
THNSL1  
ZNF431  
ZFAND2A  
ADGRF1  
CST9  
INO80E  
R3HCC1L  
QRICH2  
RAB19  
ASPHD1  
C7orf50  
CCDC153  
CCDC83  
DPPA3  
GPN2  
KAZN  
MORN1  
LYZL6  
TMEM243  
TRNP1  
DYNC2I1  
CSTL1  
ENDOV  
RERGL  
VWDE  
ZNF626  
DEFA1B  
ARMC12  
FAAP100  
LRRC37A2  
XKR9  
MARCHF1  
SYCE1L  
RAB44  
SPINK9  
ANP32C  
CLDN25  
RPRML  
CEP20  
ELAPOR2  
FAAP20

ZNF737  
C8orf86  
TRIQQ  
CENATAC  
METTL25B  
LEXM  
TEPSIN  
TP53TG1  
NPIPA5  
CMAHP  
CYP1B1-AS1  
TBC1D29P  
TMEM132E-DT  
MIR873  
MAPKAPK5-AS1  
HAGLR  
SNORA81  
SNORA4  
COX7A2P2  
DISC1FP1  
LINC00923  
LINC01013  
MIR1248  
PKD1P1  
OR4E1  
SNORA63  
TMEM9B-AS1  
C10orf143  
LINC02906  
LINC00924  
EEF1A1P5  
MIR4492  
NALCN-AS1  
LINC00640  
SNORD2  
LOC100131635  
B4GALT4-AS1  
CST9LP1  
MIR4427  
LINC01750  
MCPH1-AS1  
SDR16C6P  
SUZ12P1  
FAM95C

LOC100129534  
MOCS2-DT  
MIR4277  
PRKCZ-AS1  
OR7E154P  
SNORA63B  
DEPDC1-AS1  
CENATAC-DT  
LINC02709  
MIR1470  
RPL17P9  
ZFAND2A-DT  
DEFT1P2  
ACTG1P20  
CELF2-DT  
DEFA11P  
DINOL  
FBXO38-DT  
LINC02267  
LINC02426  
ZCCHC14-DT  
LOC101928882  
LOC101928855  
ENSG00000262633  
ATF4P4  
CRPP1  
FOXF2-DT  
LINC02400  
NPM1P39  
LINC02511  
RPS7P3  
RPS20P14  
RPL7AP10  
ENSG00000261707  
ENSG00000233754  
ENSG00000222022  
ENSG00000224079  
ENSG00000226698  
ENSG00000254554  
ENSG00000243107  
ENSG00000258942  
MIR8084  
RPL21P97  
RNU1-88P

RNU6-380P  
RNU6-440P  
RN7SL688P  
ENSG00000260461  
ENSG00000262049  
ENSG00000263826  
ENSG00000254397  
ENSG00000183889  
ENSG00000238387  
ENSG00000253821  
ENSG00000227698  
ENSG00000231724  
EEF1A1P36  
LINC01148  
LINC01643  
LCN1P2  
MTND1P24  
NRBF2P1  
LINC02151  
LINC02309  
LINC02686  
TPT1P9  
VN2R10P  
RNA5SP107  
RNU7-165P  
RPL21P41  
RPS20P25  
RNA5SP173  
ENSG00000288545  
ENSG00000270001  
ENSG00000260202  
ENSG00000261063  
ENSG00000202169  
ENSG00000231421  
ENSG00000235450  
ENSG00000251330  
ENSG00000237719  
ENSG00000222529  
ENSG00000249678  
ENSG00000262879  
ENSG00000262979  
ENSG00000261285  
HNRNPA1P67  
RNU4-64P

RNU4ATAC9P  
RNU6-102P  
RNU6-560P  
RNU6-694P  
RN7SKP242  
RNA5SP63  
RNA5SP360  
SNORA120  
ZBED1P1  
LOC101928255  
LOC107985021  
LOC107985022  
ENSG00000273218  
lnc-RAB17-7  
lnc-SBF2-3  
lnc-RPS25-6  
lnc-EED-4  
lnc-VIPR2-1  
ENSG00000231344  
ENSG00000235023  
MG828730-002  
ENSG00000245869  
ENSG00000269110  
lnc-CXCR5-2  
NFU1P1  
MTCYBP43  
TRMT112P7  
RNU7-92P  
ENSG00000284946  
ENSG00000287999  
ENSG00000269779  
HSALNG0080729-001  
lnc-CCKAR-20  
lnc-MOCS2-5  
lnc-OR7C2-1  
lnc-POP1-1  
lnc-RAB44-3  
lnc-RSPH1-4  
lnc-SLC2A6-3  
ENSG00000242068  
lnc-SWAP70-4  
lnc-TRIM49D1-2  
MN298114-198  
HSALNG0082631

HSALNG0087588  
HSALNG0099362  
lnc-CHORDC1-1  
lnc-PIGV-3  
lnc-USP28-3  
HSALNG0087589  
HSALNG0031388-001  
HSALNG0031388-002  
HSALNG0049754  
HSALNG0087578  
HSALNG0099364  
HSALNG0099363  
lnc-C7orf50-1  
piR-44098  
piR-57460-243  
lnc-FST-6  
lnc-TMEM105-1  
lnc-ZNF66-3  
RF00017-107  
RF00017-2376  
OA985837  
lnc-CXCL6-3  
NONHSAG036923.2-001  
NONHSAG036923.2-002  
RF00017-5070  
RF00017-5072  
RF00017-5074  
RF00017-6239  
RF00017-6240  
SGO1P2  
LOC107984869  
HSALNG0011563  
HSALNG0076746-001  
HSALNG0076749  
FJ601684-376  
AB372791  
lnc-TEFM-7  
MK280144-551  
HSALNG0121262-003  
lnc-FBXO38-1  
HSALNG0112598  
HSALNG0116963  
HSALNG0119185  
HSALNG0035165

HSALNG0039707-001  
HSALNG0039707-002  
HSALNG0055618  
HSALNG0062832  
LOC642355  
piR-43222  
piR-48209-548  
HSALNG0088814  
HSALNG0119064  
HSALNG0130581  
piR-43106-098  
piR-57337-010  
lnc-FBXO38-2  
piR-50444-432  
piR-34154  
lnc-DDR2-3  
piR-31432-181  
RF00026-195  
RF00017-5823  
RF00066-041  
LOC105378490  
LOC105375660  
HSALNG0025301-001  
HSALNG0059488  
HSALNG0074045-002  
HSALNG0076128  
HSALNG0059492  
HSALNG0007119  
HSALNG0080735  
HSALNG0101240  
HSALNG0124379  
lnc-CST8-1  
lnc-PLCB2-1-001  
lnc-SIGLEC15-1  
lnc-SLC1A1-7  
lnc-SGCB-1  
lnc-SPATA18-4  
lnc-TERF2IP-6  
MK280144-221  
HSALNG0090516  
HSALNG0110658  
lnc-ADAMTS18-12  
lnc-MKRN1-1  
lnc-PRC1-3

HSALNG0119063  
HSALNG0124827  
HSALNG0133334  
HSALNG0034390  
HSALNG0039132  
HSALNG0071141  
HSALNG0059497  
HSALNG0063178-002  
HSALNG0063178-003  
HSALNG0075010  
piR-35581  
HSALNG0107907  
HSALNG0108471  
HSALNG0113053  
HSALNG0115879  
HSALNG0115880  
HSALNG0121281  
piR-55361-415  
lnc-SEZ6L2-1  
lnc-TTC14-3  
piR-36756-006  
piR-38562-016  
piR-55985-066  
piR-58712  
NONHSAG020037.2  
piR-32214-308  
MN309174-501  
piR-33101-001  
lnc-DEFA1B-1-002  
RF00026-1082  
RF00998-050  
LOC105375855  
LOC105370935  
LOC107986462  
LOC105374240  
HSALNG0061800  
HSALNG0074045-001  
HSALNG0020602  
ENSG00000103200  
piR-39341-170  
piR-61240-147  
piR-46381-051  
piR-37081-005  
piR-56120

piR-30188-105  
piR-33945  
FOXO3  
MCEMP1  
PLCG1  
SEMA7A  
B3GAT1  
PRKCD  
TRPS1  
PDE6B  
TFG  
INA  
LOC110596866  
LOC110599585  
MAPK11  
CALU  
SCN3A  
HSD3B1  
SLC4A5  
DUOX1  
SLC5A4  
AGTRAP  
ATG9B  
CYP4A22  
HTN3  
SLC9B2  
HTN1  
EMX2OS  
MIR505  
MIR517A  
LINC01227  
LOC105371049  
ITGA1  
PLCL2  
TIMP4  
EYA1  
STMN2  
INO80  
LOXL1  
DLK1  
TNKS2  
REL  
LRRC8A  
PTPN6

SLC11A2  
MUC16  
ABCD1  
SPHK2  
PTH1R  
PADI4  
FGF4  
SPARC  
MAPK7  
ATP7A  
C5AR1  
NR1H2  
CA1  
PRKD1  
ACTN4  
CSN1S1  
MIR374A  
TMLHE  
TNFRSF25  
HTR7  
E2F1  
CXCL14  
LGI1  
TCFL5  
MIR215  
TRPM6  
ICAM3  
MIR211  
SOS1  
ECHS1  
PC  
GALNT3  
FAM20C  
PHEX  
SLC34A3  
BMP10  
MYBPC2  
PHOSPHO1  
SLC2A11  
MLN  
DUSP11  
ARSJ  
OR2AG1  
DMBX1

CNOT11  
CFAP47  
PVT1  
PDPK1  
ILK  
UBE2G2  
SLC12A5  
PLN  
JAK1  
MTF1  
NCEH1  
CPQ  
CTSL  
C4BPA  
SUMF1  
PTGER2  
TRDMT1  
ADH1B  
MIR18A  
HSPA14  
AKAP7  
CTSG  
WRAP53  
DRD5  
SV2A  
NTRK3  
PLD2  
BLZF1  
DSTYK  
C1QTNF3  
ARF1  
FIS1  
IFRD1  
STIM2  
ZDHHC17  
MTRNR2L8  
SLC12A4  
CD69  
ITGAX  
FGFR2  
VIPR1  
CYSLTR1  
PLA2G4A  
RNF214

MSBP1  
TRPM4  
SLC1A6  
TIAL1  
NRAS  
SMARCA1  
MIR6501  
MIR361  
MPP1  
FOXC1  
CFB  
OLIG2  
MIR638  
LRRFIP1  
GPHA2  
TGFB1  
ACACA  
UGGT2  
EMC8  
VOPP1  
MARCHF10  
TAFA4  
SCARB2  
EIF2AK3  
CHRNA2  
FOXC2  
RFXANK  
PRKACA  
MYDGF  
GIP  
EGLN2  
PTPN3  
MS  
DCDC2  
HTR1D  
TPM3  
NCS1  
TNFSF9  
PRDX2  
NTF4  
LPIN1  
KLK15  
VEGFD  
MESP2

ELOB  
CD226  
NEU1  
WNT1  
CCS  
MICAL2  
KIR2DL1  
A2M  
HAND2  
NMT1  
SYT11  
FGF5  
MIR410  
MTDH  
IFNAR1  
MIR186  
HRH1  
MDK  
MAP4K2  
SDC4  
CISD2  
ELP1  
IL6ST  
GPX4  
CYP46A1  
IL32  
CDH2  
QDPR  
CSNK1D  
KCNK9  
CACNA1E  
TRPV3  
HTR1E  
LAPTM4A  
KCNK18  
DCAF8  
SLC39A2  
CDR1  
MTRNR2L5  
GIPR  
SENP3  
PEPD  
PIK3R1  
HDAC1

EGLN3  
HLX  
RNF144B  
SOX2  
IMPA1  
CEBPB  
S1PR2  
PPP3R1  
GBE1  
KCNH2  
OCLN  
CSK  
ADCY1  
SLC45A2  
ZRANB3  
IL7R  
CASQ2  
SPI1  
PSMB8  
YY1  
MIR28  
PTPA  
GJD2  
APRT  
ACVR2A  
SCFD1  
CHRNA5  
EZR  
FCGR1A  
TAAR1  
E2F3  
MEF2A  
HBEGF  
TUBA1B  
PAX6  
MAP3K5  
PTGER1  
ELOC  
CHRM3  
PEX2  
CCL22  
MIR330  
KCNIP2  
MIR494

HTR1F  
SLC5A7  
KCNK10  
RAMP3  
ARHGEF16  
KCNS1  
CDR2  
DPYSL5  
FHL5  
GABRQ  
KCNK5  
CALCB  
TMEM67  
MRGPRG-AS1  
IL23A  
CD58  
HCN4  
NR1H4  
COL9A2  
GJC1  
DROSHA  
GFRA1  
TNNI3K  
NINJ1  
CEBPA  
HAS2  
PIK3CB  
BAG3  
LCK  
ALOX15B  
PLK4  
HLA-S  
RIPK1  
FKBP4  
MYOG  
IRX4  
CIB1  
TBX2  
BCKDHA  
GCSH  
ZFPM2  
COX8A  
MED15  
PGAP1

EXOSC10  
ZNF74  
LMBRD1  
CENPB  
GKN1  
PCDH18  
TSSK1B  
LAX1  
RIMBP2  
AAR2  
UFD1  
HUS1B  
GGACT  
KCTD19  
GLOD5  
QARS1  
STMND1  
TSIX  
HSD17B10  
KIAA0586  
MIR106B  
MIR92A1  
LMO4  
GNE  
MSH6  
MLH1  
SGSH  
ATXN1  
OLIG1  
ARSH  
RHO  
YWHAZ  
EPX  
POLR1F  
SERPINA10  
CAPN5  
CD2AP  
CPT1B  
FSTL1  
SOX17  
PER2  
YAP1  
SMPD2  
MOAP1

INTS5  
IGFBP7  
SGCB  
CRHR1  
AKT1S1  
MIR23A  
CDR1-AS  
TAT  
TFPI2  
MMP16  
AP2B1  
LINGO1  
MRE11  
DHX37  
MFF  
ATP2B4  
PTAFR  
PLK1  
PRKAB1  
RAP1A  
PPP2R2B  
CLOCK  
ATF4  
SNHG1  
HLA-G  
JUP  
F2RL3  
SIRT4  
PAK1  
INPP5K  
CDH23  
SLC29A1  
POSTN  
LAMA4  
PRMT1  
PTPRJ  
PARVA  
PPIA  
FDFT1  
TREM1  
SYK  
HSPE1  
ZBTB7C  
TSC22D3

SESN2  
EFNB2  
SLC22A4  
SLC6A9  
HCRTR1  
DLD  
NISCH  
KRT19  
SLC22A6  
MAZ  
MYOM2  
MIR424  
APC  
MSH2  
SLC11A1  
POLD1  
BST1  
PRG2  
ANO5  
CD52  
STBD1  
HAR1B  
KIR2DL3  
KIR2DL2  
KIR2DS2  
KIR2DS1  
FGF10  
ST3GAL4  
KCNJ8  
NID1  
TEAD1  
MIR766  
AQP3  
LRP2  
LAMA2  
PGR  
GAMT  
TIMM8A  
PPARGC1B  
GPR68  
SNHG16  
PLA2G15  
PLEKHG1  
CAMK2D

VGLL4  
PPP2CA  
MSI1  
FTH1  
SPTBN2  
MYOZ2  
UCN2  
C1QTNF9  
ITPKC  
GNPTAB  
GCM2  
NRG2  
PARL  
DGCR2  
ELP4  
OPA3  
TOMM20  
DR1  
SLC25A46  
DENR  
ZNF274  
ZNF2  
CDR2L  
THBS2  
OGN  
CMYA5  
GABBR2  
LRG1  
TERF2  
RPS6KB1  
MIR486-1  
PARP2  
PARP4  
SLC9A2  
PARP3  
GBA3  
ITGB8  
TNXA  
HIF1AN  
CDH1  
NPAS4  
TERF1  
ESRRA  
TP63

PLSCR3  
TATDN1  
MRPL52  
EMILIN3  
FGF13  
AKT3  
ANXA2  
DSG2  
CSF2RA  
ACD  
POT1  
TERF2IP  
TEP1  
PAFAH2  
MAP2K1  
EFNB1  
DIABLO  
RAF1  
SHC1  
FABP5  
CARD16  
CIDEA  
ELAVL3  
TRIM72  
SLC23A2  
ITGA7  
TRAF2  
ESRRG  
MIR485  
IRAK4  
TJP2  
POU5F1  
CYGB  
FAH  
PDE11A  
SNHG12  
OPRL1  
MSR1  
CPE  
SERPINB2  
PIGF  
NOS1AP  
PAPPA2  
MIRLET7F1

INPPL1  
PTPN2  
ASAH1  
AGRN  
NRF1  
TCAP  
PNPLA3  
PMS1  
CHEK1  
BARD1  
PACC1  
ADAM10  
HSPA9  
MIR532  
MIR487B  
SRF  
SLC4A7  
ASIC2  
MIR15B  
DSC2  
LMAN1  
GSS  
ATP2A3  
PPP3CB  
ABCC5  
GSTA4  
OIP5-AS1  
BIRC3  
ACSS2  
PDLIM1  
ALDH9A1  
GLUD1  
IL3RA  
MIR200A  
ZNF98  
MTRFR  
ACTN1  
ACADM  
EIF2S1  
FCN3  
MOV10  
PGK1  
CYP2C18  
PPP1R15A

SRR  
CCND2  
FHL1  
CCR7  
XRCC5  
ATG5  
CRHR2  
TTPA  
RBM8A  
SYN2  
TRAPPC10  
CGB3  
MIR193A  
TPI1  
AMD1  
KHSRP  
FTMT  
EEF2  
COL18A1  
SENP2  
SLC1A4  
GRIN2C  
FBLN1  
PRG4  
CCT8  
S100A12  
LCORL  
COQ8B  
CDK2  
CUL3  
FHL2  
CA3  
GLI3  
RDX  
MITF  
ALDH5A1  
CACNB3  
CACNB1  
UBQLN1  
SCNN1D  
VNN1  
ATP5PF  
CLCN3  
MIRLET7F2

SLC5A1  
SLC22A5  
DICER1  
GPRC6A  
DGKQ  
FUT3  
LCT  
APOBEC2  
MEPE  
PTPRU  
DLGAP4  
CABIN1  
GOSR1  
SHOX  
ADGRL1  
MIR181C  
HDAC2  
DNM2  
PBX1  
YWHAE  
GLB1  
LAMB1  
KCNJ6  
CACNA1F  
ETFA  
ROBO1  
NPY2R  
TDP1  
RPS6  
CHRNE  
EEF1A1  
RGS4  
ANKRD1  
PRKRA  
WWP1  
RHD  
UPF1  
PLEK  
DCAF17  
MIR455  
VASH1  
BAG6  
IFNE  
IFNGR1

KRT7  
CD47  
RXRA  
SLC29A3  
IL12RB2  
POLR1C  
RHOT1  
SLC17A6  
SERPINE2  
SLC17A7  
AGO2  
WBP1L  
MIR139  
MIR1306  
MIR497  
ANXA1  
CHRM2  
GLS  
MYOD1  
PHB  
HTR6  
CCL21  
CYTL1  
ACKR2  
MIR1-1  
GPI  
MAP3K14  
GLRX  
PTGIR  
FRMD4B  
GATD3  
SUCNR1  
F11R  
ITGA6  
EPHB2  
CASP6  
MYLK2  
PLD1  
DUSP1  
GJB2  
MMP19  
HCN2  
CHRM1  
RORC

AOX1  
COPS5  
MYL1  
CAMP  
SPRED1  
MICA  
MIP  
ITPKB  
PROK2  
TNFRSF10B  
ITGB4  
MIR217  
MIR665  
SLC8A2  
PEBP1  
ACVR2B  
ANPEP  
STAT6  
RPA1  
ALPP  
GPR37  
CYC1  
LAMB2  
FEN1  
MDH1  
PDIA3  
ACAA2  
COL6A2  
XRCC4  
COL6A1  
CD82  
TPP1  
SLC22A8  
BPI  
ABCB10  
BCAP31  
ELAVL2  
CHM  
IL17B  
THBS3  
RBP3  
ZMIZ1  
MKKS  
PEG3

ADAMTS9  
ATG14  
ADPRH  
RNF126  
NARS1  
MIR26A2  
HSPA12B  
MCAM  
MIR194-1  
GRK5  
MDFI  
SAA2  
PLPP1  
FLJ16779  
SLC16A1  
ITGB5  
PPM1A  
MT2A  
TRIM65  
TRIM47  
SNORD118  
ANXA6  
MIR101-1  
GPR17  
HMCN1  
ITGB7  
ITGA8  
ITGA9  
ITGA11  
ITGA10  
ITGAD  
PPP2CB  
ADAMTS4  
STC2  
GATA2  
SUMO2  
ANKRD2  
SP8  
NR1I2  
GPC3  
LONP1  
SLC1A5  
VAV2  
DHX9

DAB2IP  
CLEC4A  
LOC111365141  
MAP3K1  
MAP2K7  
HELLS  
S1PR3  
FAP  
FRZB  
CREG1  
MEIS1  
NDRG2  
TMEM196  
MIR3146  
FCER1G  
GSTA2  
AQP8  
SCG5  
EFS  
SIVA1  
AHR  
CCNA2  
DBT  
PARG  
AZIN2  
TMEM107  
H2BC3  
MIR544A  
MIR1264  
CSF2RB  
PLCD1  
PRKCI  
PRLR  
SLC27A4  
HSP90AB1  
SLC6A6  
AKAP13  
SLCO2B1  
FLRT3  
ID1  
LAMC1  
SLC38A1  
SIRPA  
DYNLL1

CCT3  
BBC3  
ESAM  
PCSK6  
RAB1A  
TLN1  
BIK  
CCT4  
SLC16A4  
MUC2  
BCL2L14  
FHOD1  
HIGD1A  
DCTN6  
APOO  
CCL23  
LANCL1  
NRDC  
MIR26A1  
MIR194-2  
ZFAS1  
HOTAIRM1  
HOXA-AS2  
MIR216B  
MIR496  
CCAT2  
MIR1202  
HOXB-AS2  
MIR448  
C20orf181  
CERNA3  
TSPAN33  
PCYT1A  
PIK3CD  
GABPA  
HDAC6  
MTCO2P12  
COX2  
CHDH  
POLDIP2  
MIR137  
MIR19A  
COX1  
ACSM3

SLC25A1  
CAD  
MIR874  
MIR499B  
PPIF  
PGR-AS1  
AHSA1  
RBM45  
CRK  
MLKL  
RCOR1  
POU2F3  
RNF19A  
GLP1R  
GPER1  
IRF4  
KCNJ13  
MIR107  
TNFSF12-TNFSF13  
NUBP1  
CKLF  
CLEC1B  
PIN1  
PPID  
TUG1  
ACKR3  
MOK  
BCL2A1  
HPSE2  
SULT1E1  
AIMP2  
NEIL1  
NR4A3  
COASY  
ULK1  
TSLP  
HSPB3  
MCU  
SLC33A1  
GRAP2  
ZGLP1  
MIR298  
MIR922  
DEFB4B

MIR1203  
MIR664A  
HOTTIP  
MIR4656  
EDIL3  
EBI3  
EMSLR  
LOC101929707  
IRF9  
ERICD  
AGR2  
GNLY  
SORBS1  
CXCR6  
TRAF3IP2  
PLK2  
LILRB1  
RNPS1  
FASTK  
PDIA5  
DUSP14  
VSIG4  
MGLL  
CIRBP  
H3P7  
FOPNL  
TAF8  
CRMP1  
DEFB104A  
SRXN1  
CRYZ  
RMDN2  
C5orf38  
CYP2B7P  
DLG2  
EGR2  
EGR4  
ELK1  
FCGR3A  
MCF2L2  
TBC1D9  
MLC1  
ARC  
CRTC1

TRS-AGA2-3  
SPIDR  
MMD  
MAPK8IP2  
SMUG1  
DAPK2  
BCL2L13  
ABCA4  
HECTD1  
GALNT2  
HSPA12A  
FAM98A  
IS1  
COPD  
GEM  
NAAA  
GLI2  
GOT2  
SNHG15  
GPR42  
REM1  
GRINA  
NOP53  
HDLBP  
HK2  
HLA-C  
AOC2  
HES1  
FFAR4  
ID2  
IFIT3  
ACTBL2  
MAGEB5  
IKBKB  
INSRR  
JAK3  
AREG  
KIR3DL1  
KIR3DL2  
C11orf96  
LAD1  
LAMA5  
LAMC2  
RPSA

LCP1  
LGALS9  
LIG4  
LINC01194  
CIMT  
MIRLET7E  
MIR106A  
MIR129-2  
MIR152  
MIR219A1  
MIR31  
ARRB2  
MRC1  
POTEKP  
MSD  
PLF  
CYTB  
MUSK  
ATF3  
NM  
OATP1  
P2RY2  
DEFB104B  
PAEP  
AK3  
MLXIPL  
RMDN1  
PCSK1  
MZB1  
MS4A4A  
STK26  
ASIC5  
PKM  
PLP1  
PNN  
NANS  
POR  
POU2F1  
TOMM7  
TMEM132A  
ANO1  
RMDN3  
IMPACT  
MIR449A

PRH1  
PRH2  
SYBU  
VPS35  
RNF130  
MASP1  
MMP26  
ANKS1B  
PDXP  
PTGDR  
MRS2  
MIR363  
NDRG3  
NLN  
TAOK1  
SEMA6A  
PTMA  
PTMAP4  
PRX  
NLRC4  
RAPSN  
RGS7  
RPS20  
RTN1  
S100A11  
TSPAN31  
BHMT  
CCL19  
NEUROG2  
CRLF2  
POTEM  
SNHG6  
ITSN1  
GORASP1  
SHMT1  
SMURF2  
NMNAT1  
MARCHF7  
NBEAL1  
MARCKSL1  
SLC6A11  
SLC6A13  
SLCO1A2  
CYP4F12

SMN2  
BNIP3L  
SSTR4  
STAR  
SCARNA6  
STIM1  
BRS3  
SYT1  
BTF3P11  
MIR605  
MIR608  
MIR618  
TFDP1  
SERPING1  
TM7SF2  
TRC-GCA24-1  
ACTG2  
UBE2L3  
UGT2B4  
VPS51  
UTRN  
REEP5  
MUL1  
DHX40  
EHMT1  
ARHGEF5  
MAP9  
ERMP1  
WLS  
FLAD1  
AKAP1  
QTRT1  
PLVAP  
TSPAN10  
MINDY4  
KLF11  
NTNG2  
KDM2B  
ACCS  
GPR65  
ORAI1  
PIAS1  
IL18RAP  
OTULIN

USP14  
LPAR2  
XPR1  
METTL18  
NOG  
MSC  
SPECC1  
DNER  
ZFYVE9  
GTPBP1  
SNCAIP  
GRIN3B  
KCNC2  
HCAR2  
TACR3  
PDE1  
NMDAR  
OPR  
PARP  
AGAP2  
ATP7B  
MAPKAPK2  
P2RX5  
TRNL1

---

**Table SX.** IS-related DEGs between IS samples and healthy control subjects.

| DEGs     | logFC       | AveExpr     | t-value     | P-value               | adj. P-Value          | B-value     |
|----------|-------------|-------------|-------------|-----------------------|-----------------------|-------------|
| C5AR1    | 0.940180226 | 11.88368589 | 6.648818289 | $8.10 \times 10^{-9}$ | $6.96 \times 10^{-5}$ | 9.864121724 |
| RGS2     | 0.976577123 | 14.79534996 | 6.588266978 | $1.03 \times 10^{-8}$ | $6.96 \times 10^{-5}$ | 9.642051610 |
| ARG1     | 1.659184809 | 9.472992807 | 6.310007735 | $3.12 \times 10^{-8}$ | $1.40 \times 10^{-5}$ | 8.625130604 |
| VNN2     | 0.834781442 | 14.36524216 | 6.084623658 | $7.58 \times 10^{-8}$ | $2.56 \times 10^{-4}$ | 7.806901937 |
| KCNJ15   | 0.954581547 | 10.16617911 | 5.875315293 | $1.72 \times 10^{-7}$ | $3.40 \times 10^{-4}$ | 7.052627767 |
| LAMP2    | 0.981300819 | 12.55130808 | 5.874437248 | $1.73 \times 10^{-7}$ | $3.40 \times 10^{-4}$ | 7.049476537 |
| CKAP4    | 0.946953524 | 11.52046001 | 5.838854273 | $1.98 \times 10^{-7}$ | $3.40 \times 10^{-4}$ | 6.921869733 |
| PPP3R1   | 0.694766343 | 11.64571196 | 5.834749003 | $2.02 \times 10^{-7}$ | $3.40 \times 10^{-4}$ | 6.907159891 |
| CRISPLD2 | 1.039070222 | 11.33897315 | 5.780324262 | $2.49 \times 10^{-7}$ | $3.73 \times 10^{-4}$ | 6.712395616 |
| MARCKS   | 0.910581766 | 12.40819049 | 5.744362646 | $2.86 \times 10^{-7}$ | $3.78 \times 10^{-4}$ | 6.583963297 |
| TLN1     | 0.764866363 | 10.48166448 | 5.725238936 | $3.08 \times 10^{-7}$ | $3.78 \times 10^{-4}$ | 6.515752084 |
| ANTXR2   | 0.813030832 | 11.04619150 | 5.675902729 | $3.73 \times 10^{-7}$ | $4.20 \times 10^{-4}$ | 6.340063202 |
| PADI4    | 1.009479655 | 13.02302498 | 5.597492236 | $5.05 \times 10^{-7}$ | $5.24 \times 10^{-4}$ | 6.061717869 |
| FGL2     | 0.740118288 | 13.63330132 | 5.577110303 | $5.46 \times 10^{-7}$ | $5.26 \times 10^{-4}$ | 5.989548294 |
| SIRPB1   | 0.647859602 | 9.445710604 | 5.545709189 | $6.16 \times 10^{-7}$ | $5.41 \times 10^{-4}$ | 5.878513979 |

|         |             |             |             |                       |                       |             |
|---------|-------------|-------------|-------------|-----------------------|-----------------------|-------------|
| LHFPL2  | 0.691545734 | 9.221133669 | 5.535391609 | $6.41 \times 10^{-7}$ | $5.41 \times 10^{-4}$ | 5.842072028 |
| MMP9    | 1.397364165 | 11.79202121 | 5.502863191 | $7.26 \times 10^{-7}$ | $5.46 \times 10^{-4}$ | 5.727315960 |
| CA4     | 1.079446130 | 10.64186790 | 5.501991582 | $7.29 \times 10^{-7}$ | $5.50 \times 10^{-4}$ | 5.724243886 |
| PROS1   | 0.616942170 | 8.534427668 | 5.428125941 | $9.66 \times 10^{-7}$ | $6.86 \times 10^{-4}$ | 5.464451214 |
| DYSF    | 0.914980379 | 11.60968035 | 5.391868571 | $1.11 \times 10^{-6}$ | $7.49 \times 10^{-4}$ | 5.337341532 |
| RRAGD   | 0.718308504 | 10.47358004 | 5.377166466 | $1.17 \times 10^{-6}$ | $7.54 \times 10^{-4}$ | 5.285878756 |
| IGF2R   | 0.861326850 | 12.72153672 | 5.355837544 | $1.27 \times 10^{-6}$ | $7.80 \times 10^{-4}$ | 5.211302330 |
| CTSZ    | 0.834922355 | 10.48964988 | 5.342474187 | $1.34 \times 10^{-6}$ | $7.85 \times 10^{-4}$ | 5.164627835 |
| PLXDC2  | 0.761512052 | 9.690803054 | 5.322877497 | $1.44 \times 10^{-6}$ | $8.11 \times 10^{-4}$ | 5.096253081 |
| TNFSF10 | 0.876704058 | 12.52954786 | 5.302960586 | $1.56 \times 10^{-6}$ | $8.39 \times 10^{-4}$ | 5.026848582 |
| ACOX1   | 0.801215883 | 9.653246851 | 5.273506974 | $1.74 \times 10^{-6}$ | $8.71 \times 10^{-4}$ | 4.924375663 |
| CD163   | 0.977186383 | 9.496562610 | 5.269168260 | $1.77 \times 10^{-6}$ | $8.71 \times 10^{-4}$ | 4.909297457 |
| RAB27A  | 0.585948814 | 9.398214571 | 5.261472281 | $1.82 \times 10^{-6}$ | $8.71 \times 10^{-4}$ | 4.882562511 |
| ID3     | -0.86688273 | 9.452691201 | -5.25383932 | $1.87 \times 10^{-6}$ | $8.71 \times 10^{-4}$ | 4.856060012 |
| SLC2A3  | 0.734030116 | 13.56313260 | 5.205695983 | $2.25 \times 10^{-6}$ | $9.82 \times 10^{-4}$ | 4.689215562 |
| SORL1   | 0.736262147 | 12.55465865 | 5.204287107 | $2.26 \times 10^{-6}$ | $9.82 \times 10^{-4}$ | 4.684341270 |
| CPD     | 0.916716920 | 10.66014036 | 5.180313505 | $2.47 \times 10^{-6}$ | $1.03 \times 10^{-3}$ | 4.601472984 |

|           |             |             |             |                       |                       |             |
|-----------|-------------|-------------|-------------|-----------------------|-----------------------|-------------|
| BAZ2B     | 0.893310135 | 11.11996452 | 5.175255467 | $2.52 \times 10^{-6}$ | $1.03 \times 10^{-3}$ | 4.584006913 |
| CTSS      | 0.859844226 | 11.74359702 | 5.164217291 | $2.62 \times 10^{-6}$ | $1.04 \times 10^{-3}$ | 4.545912330 |
| NDST1     | 0.585506379 | 8.758176245 | 5.081831164 | $3.57 \times 10^{-6}$ | $1.38 \times 10^{-3}$ | 4.262542475 |
| AQP9      | 0.729013264 | 14.27312798 | 5.068395971 | $3.76 \times 10^{-6}$ | $1.41 \times 10^{-3}$ | 4.216495397 |
| FBN2      | 0.530989795 | 8.627006366 | 5.046943459 | $4.07 \times 10^{-6}$ | $1.48 \times 10^{-3}$ | 4.143067554 |
| KIAA0319L | 0.615910105 | 9.466357510 | 5.020957933 | $4.48 \times 10^{-6}$ | $1.59 \times 10^{-3}$ | 4.054286353 |
| CORO1C    | 0.785370683 | 10.19115123 | 4.992785207 | $4.98 \times 10^{-6}$ | $1.70 \times 10^{-3}$ | 3.958236232 |
| ETS2      | 0.593576224 | 9.951922529 | 4.988832106 | $5.05 \times 10^{-6}$ | $1.70 \times 10^{-3}$ | 3.944775957 |
| MYH9      | 0.737387802 | 13.18152184 | 4.973740200 | $5.34 \times 10^{-6}$ | $1.76 \times 10^{-3}$ | 3.893427299 |
| STK3      | 0.648197628 | 9.026107069 | 4.963586870 | $5.54 \times 10^{-6}$ | $1.78 \times 10^{-3}$ | 3.858916752 |
| PDK4      | 0.988033856 | 9.406609827 | 4.933809007 | $6.19 \times 10^{-6}$ | $1.94 \times 10^{-3}$ | 3.757868198 |
| PACSIN2   | 0.608321475 | 12.49697803 | 4.900480735 | $7.00 \times 10^{-6}$ | $2.15 \times 10^{-3}$ | 3.645066717 |
| SRPK1     | 0.794565511 | 11.02945376 | 4.878647340 | $7.58 \times 10^{-6}$ | $2.23 \times 10^{-3}$ | 3.571341940 |
| RAB31     | 0.654196987 | 12.96857748 | 4.876463408 | $7.65 \times 10^{-6}$ | $2.23 \times 10^{-3}$ | 3.563975015 |
| TNFSF13B  | 0.830729821 | 12.34466175 | 4.872551049 | $7.76 \times 10^{-6}$ | $2.23 \times 10^{-3}$ | 3.550781142 |
| SESN3     | 0.770577174 | 10.86761066 | 4.858737702 | $8.16 \times 10^{-6}$ | $2.29 \times 10^{-3}$ | 3.504233165 |
| NCOA1     | 0.613180926 | 11.02817569 | 4.833769181 | $8.94 \times 10^{-6}$ | $2.39 \times 10^{-3}$ | 3.420236396 |

|        |              |             |              |                       |                       |             |
|--------|--------------|-------------|--------------|-----------------------|-----------------------|-------------|
| APRT   | -0.717696244 | 10.98022229 | -4.832802177 | $8.97 \times 10^{-6}$ | $2.39 \times 10^{-3}$ | 3.416986991 |
| ADM    | 0.826411588  | 12.41296681 | 4.802760107  | $1.00 \times 10^{-5}$ | $2.55 \times 10^{-3}$ | 3.316175813 |
| CTTN   | 0.505405670  | 8.480643316 | 4.798602531  | $1.02 \times 10^{-5}$ | $2.55 \times 10^{-3}$ | 3.302245673 |
| HAL    | 0.827414038  | 10.28858791 | 4.797273922  | $1.02 \times 10^{-5}$ | $2.55 \times 10^{-3}$ | 3.297795210 |
| TSEN34 | 0.703117816  | 12.80431714 | 4.769687624  | $1.13 \times 10^{-5}$ | $2.73 \times 10^{-3}$ | 3.205509888 |
| MGAM   | 0.715429106  | 8.948014969 | 4.769118778  | $1.13 \times 10^{-5}$ | $2.73 \times 10^{-3}$ | 3.203609348 |
| F5     | 0.708004488  | 9.353072876 | 4.763985059  | $1.15 \times 10^{-5}$ | $2.73 \times 10^{-3}$ | 3.186461873 |
| LILRB3 | 0.672497097  | 13.70732475 | 4.753519189  | $1.20 \times 10^{-5}$ | $2.75 \times 10^{-3}$ | 3.151529226 |
| NPL    | 0.702474525  | 11.50605667 | 4.750384494  | $1.21 \times 10^{-5}$ | $2.75 \times 10^{-3}$ | 3.141072915 |
| IQGAP1 | 1.016718296  | 10.94951288 | 4.747919754  | $1.22 \times 10^{-5}$ | $2.75 \times 10^{-3}$ | 3.132853489 |
| RASSF2 | 0.708409228  | 12.15511445 | 4.742533800  | $1.25 \times 10^{-5}$ | $2.76 \times 10^{-3}$ | 3.114898939 |
| SDCBP  | 0.817769129  | 12.4825562  | 4.737621532  | $1.27 \times 10^{-5}$ | $2.76 \times 10^{-3}$ | 3.098531316 |
| CLEC4D | 0.743928223  | 8.732373497 | 4.724470895  | $1.33 \times 10^{-5}$ | $2.85 \times 10^{-3}$ | 3.054750583 |
| DUSP1  | 0.745437990  | 13.44982708 | 4.710591917  | $1.40 \times 10^{-5}$ | $2.92 \times 10^{-3}$ | 3.008603893 |
| CXCL16 | 0.730812535  | 11.54207232 | 4.709697257  | $1.41 \times 10^{-5}$ | $2.92 \times 10^{-3}$ | 3.005631290 |
| FLT3LG | -0.761447712 | 9.430981270 | -4.689615948 | $1.51 \times 10^{-5}$ | $3.09 \times 10^{-3}$ | 2.938975750 |
| ALOX5  | 0.641737969  | 13.99088462 | 4.678393263  | $1.57 \times 10^{-5}$ | $3.14 \times 10^{-3}$ | 2.901780469 |

|            |              |             |              |                       |                       |             |
|------------|--------------|-------------|--------------|-----------------------|-----------------------|-------------|
| BASPI      | 0.754481300  | 14.12745788 | 4.674754926  | $1.60 \times 10^{-5}$ | $3.14 \times 10^{-3}$ | 2.889730618 |
| NUMB       | 0.719144285  | 12.51264575 | 4.672367570  | $1.61 \times 10^{-5}$ | $3.14 \times 10^{-3}$ | 2.881826215 |
| MTMR3      | 0.685135723  | 11.30579423 | 4.669244449  | $1.63 \times 10^{-5}$ | $3.14 \times 10^{-3}$ | 2.871488510 |
| PAK1       | 0.562378454  | 10.78732363 | 4.643631600  | $1.78 \times 10^{-5}$ | $3.33 \times 10^{-3}$ | 2.786827669 |
| NDEL1      | 0.642217198  | 13.05688525 | 4.641365822  | $1.80 \times 10^{-5}$ | $3.33 \times 10^{-3}$ | 2.779348632 |
| SLC22A4    | 0.789594032  | 10.33568327 | 4.638682883  | $1.82 \times 10^{-5}$ | $3.33 \times 10^{-3}$ | 2.770494771 |
| CYBRD1     | 0.759022034  | 10.40153883 | 4.634679558  | $1.84 \times 10^{-5}$ | $3.33 \times 10^{-3}$ | 2.757287941 |
| F13A1      | 0.745247123  | 10.07221366 | 4.631096664  | $1.87 \times 10^{-5}$ | $3.33 \times 10^{-3}$ | 2.745472561 |
| DOCK8      | 0.850862010  | 11.38647517 | 4.629358160  | $1.88 \times 10^{-5}$ | $3.33 \times 10^{-3}$ | 2.739740978 |
| ATP6V1B2   | 0.583043457  | 13.95914176 | 4.626348999  | $1.90 \times 10^{-5}$ | $3.33 \times 10^{-3}$ | 2.729822589 |
| IRS2       | 0.786329912  | 9.974554859 | 4.609332763  | $2.02 \times 10^{-5}$ | $3.49 \times 10^{-3}$ | 2.673792242 |
| IRAK3      | 0.821434265  | 10.21580921 | 4.596576113  | $2.11 \times 10^{-5}$ | $3.61 \times 10^{-3}$ | 2.631850744 |
| ST6GALNAC6 | -0.521226586 | 9.234497596 | -4.586464928 | $2.19 \times 10^{-5}$ | $3.70 \times 10^{-3}$ | 2.598645684 |
| NCR3       | -0.668693804 | 9.122589453 | -4.582840301 | $2.22 \times 10^{-5}$ | $3.70 \times 10^{-3}$ | 2.586750794 |
| HECW2      | 0.655742088  | 8.637622001 | 4.571698603  | $2.31 \times 10^{-5}$ | $3.80 \times 10^{-3}$ | 2.550214956 |
| HMGCR      | 0.666128716  | 10.31688840 | 4.564702683  | $2.37 \times 10^{-5}$ | $3.81 \times 10^{-3}$ | 2.527295409 |
| B4GALT5    | 0.794467976  | 11.52828427 | 4.564145978  | $2.37 \times 10^{-5}$ | $3.81 \times 10^{-3}$ | 2.525472283 |

|        |              |             |              |                       |                       |             |
|--------|--------------|-------------|--------------|-----------------------|-----------------------|-------------|
| RBP7   | 0.759158117  | 10.15884596 | 4.552771638  | $2.47 \times 10^{-5}$ | $3.93 \times 10^{-3}$ | 2.488246129 |
| GAA    | 0.529268808  | 9.116818025 | 4.548651578  | $2.51 \times 10^{-5}$ | $3.94 \times 10^{-3}$ | 2.474772814 |
| MFGE8  | -0.700665648 | 9.708926972 | -4.537910639 | $2.61 \times 10^{-5}$ | $4.05 \times 10^{-3}$ | 2.439675416 |
| THBS1  | 0.667688579  | 8.561252517 | 4.528568764  | $2.70 \times 10^{-5}$ | $4.09 \times 10^{-3}$ | 2.409181912 |
| STAT3  | 0.562305299  | 11.76556291 | 4.528325929  | $2.70 \times 10^{-5}$ | $4.09 \times 10^{-3}$ | 2.408389658 |
| PPP4R1 | 0.849001996  | 11.37634296 | 4.514995172  | $2.83 \times 10^{-5}$ | $4.24 \times 10^{-3}$ | 2.364929148 |
| MANSC1 | 0.739709561  | 9.318278125 | 4.489867225  | $3.10 \times 10^{-5}$ | $4.50 \times 10^{-3}$ | 2.283176260 |
| CEBPD  | 0.710763132  | 13.17400579 | 4.489402151  | $3.10 \times 10^{-5}$ | $4.50 \times 10^{-3}$ | 2.281665244 |
| ACTN1  | 0.704886041  | 12.86627320 | 4.482370894  | $3.18 \times 10^{-5}$ | $4.56 \times 10^{-3}$ | 2.258830153 |
| ERGIC1 | 0.770558921  | 11.30831173 | 4.453590176  | $3.52 \times 10^{-5}$ | $5.00 \times 10^{-3}$ | 2.165543088 |
| CD6    | -0.919591634 | 11.39679330 | -4.436585016 | $3.74 \times 10^{-5}$ | $5.16 \times 10^{-3}$ | 2.110563403 |
| PASK   | -0.70161005  | 9.191122829 | -4.431693909 | $3.80 \times 10^{-5}$ | $5.16 \times 10^{-3}$ | 2.094769181 |
| TAOK1  | 0.753740884  | 8.993877579 | 4.429693709  | $3.83 \times 10^{-5}$ | $5.16 \times 10^{-3}$ | 2.088312686 |
| REPS2  | 0.553765280  | 8.986354630 | 4.428218872  | $3.85 \times 10^{-5}$ | $5.16 \times 10^{-3}$ | 2.083552950 |
| P2RX1  | 0.511016456  | 9.283029742 | 4.415204077  | $4.03 \times 10^{-5}$ | $5.28 \times 10^{-3}$ | 2.041584609 |
| ITPK1  | 0.612417362  | 10.05798245 | 4.413700070  | $4.05 \times 10^{-5}$ | $5.28 \times 10^{-3}$ | 2.036738668 |
| ARID3A | 0.583965088  | 10.94660664 | 4.407651522  | $4.14 \times 10^{-5}$ | $5.32 \times 10^{-3}$ | 2.017258462 |

|          |              |             |              |                       |                       |             |
|----------|--------------|-------------|--------------|-----------------------|-----------------------|-------------|
| SUSD3    | -0.653036244 | 10.21965670 | -4.403962702 | $4.19 \times 10^{-5}$ | $5.32 \times 10^{-3}$ | 2.005384667 |
| CTNNA1   | 0.605471988  | 9.785722930 | 4.402117881  | $4.22 \times 10^{-5}$ | $5.32 \times 10^{-3}$ | 1.999448320 |
| HSDL2    | 0.711626169  | 9.787297372 | 4.385463017  | $4.48 \times 10^{-5}$ | $5.54 \times 10^{-3}$ | 1.945912201 |
| SERPINA1 | 0.606078252  | 13.60662031 | 4.375982793  | $4.63 \times 10^{-5}$ | $5.61 \times 10^{-3}$ | 1.915484321 |
| MXD1     | 0.679532056  | 13.13022723 | 4.374395822  | $4.65 \times 10^{-5}$ | $5.61 \times 10^{-3}$ | 1.910394010 |
| CD8B     | -0.609911836 | 8.434255745 | -4.350497381 | $5.06 \times 10^{-5}$ | $6.04 \times 10^{-3}$ | 1.833851830 |
| MTPN     | 0.612706330  | 13.35449518 | 4.343688446  | $5.18 \times 10^{-5}$ | $6.14 \times 10^{-3}$ | 1.812083285 |
| CCR7     | -1.070948334 | 11.79663556 | -4.33583909  | $5.33 \times 10^{-5}$ | $6.25 \times 10^{-3}$ | 1.787010146 |
| VASP     | 0.819836241  | 9.925740703 | 4.330450142  | $5.43 \times 10^{-5}$ | $6.26 \times 10^{-3}$ | 1.769809759 |
| MAL      | -0.932641898 | 12.25648143 | -4.324677653 | $5.54 \times 10^{-5}$ | $6.33 \times 10^{-3}$ | 1.751397407 |
| ATP6V1A  | 0.664397103  | 12.29568772 | 4.321221183  | $5.61 \times 10^{-5}$ | $6.36 \times 10^{-3}$ | 1.740378464 |
| STOM     | 0.677098736  | 11.50466540 | 4.313680205  | $5.76 \times 10^{-5}$ | $6.42 \times 10^{-3}$ | 1.716354236 |
| PYGL     | 0.935428338  | 11.49328495 | 4.304639533  | $5.94 \times 10^{-5}$ | $6.57 \times 10^{-3}$ | 1.687580899 |
| CLEC4E   | 0.657019551  | 8.848400105 | 4.297062930  | $6.10 \times 10^{-5}$ | $6.69 \times 10^{-3}$ | 1.663491331 |
| RNF13    | 0.754682058  | 10.68853738 | 4.293063827  | $6.19 \times 10^{-5}$ | $6.73 \times 10^{-3}$ | 1.650785220 |
| EIF2AK2  | 0.879163186  | 11.56191973 | 4.283767603  | $6.39 \times 10^{-5}$ | $6.90 \times 10^{-3}$ | 1.621272732 |
| GCA      | 0.682486168  | 14.09136897 | 4.273078574  | $6.63 \times 10^{-5}$ | $7.10 \times 10^{-3}$ | 1.587379913 |

|        |              |             |              |                       |                       |             |
|--------|--------------|-------------|--------------|-----------------------|-----------------------|-------------|
| IL7R   | -0.851333842 | 12.57256865 | -4.233812318 | $7.60 \times 10^{-5}$ | $8.01 \times 10^{-3}$ | 1.463257571 |
| CREG1  | 0.556562874  | 10.93187287 | 4.227470968  | $7.77 \times 10^{-5}$ | $8.12 \times 10^{-3}$ | 1.443269271 |
| GNS    | 0.643212950  | 13.0757992  | 4.217330125  | $8.05 \times 10^{-5}$ | $8.35 \times 10^{-3}$ | 1.411337945 |
| SNURF  | -0.725375373 | 10.54728302 | -4.206554385 | $8.35 \times 10^{-5}$ | $8.49 \times 10^{-3}$ | 1.377452416 |
| ECHDC3 | 0.803391267  | 9.195415366 | 4.205773820  | $8.37 \times 10^{-5}$ | $8.49 \times 10^{-3}$ | 1.374999646 |
| ABHD5  | 0.782595765  | 10.28431352 | 4.197392316  | $8.62 \times 10^{-5}$ | $8.68 \times 10^{-3}$ | 1.348677847 |
| VEGFB  | -0.703636161 | 11.02184008 | -4.194764033 | $8.70 \times 10^{-5}$ | $8.69 \times 10^{-3}$ | 1.340429638 |
| ITGA2B | 0.538378677  | 8.434126105 | 4.189771651  | $8.85 \times 10^{-5}$ | $8.74 \times 10^{-3}$ | 1.324769961 |
| TBXAS1 | 0.510177465  | 11.55314093 | 4.186806386  | $8.94 \times 10^{-5}$ | $8.74 \times 10^{-3}$ | 1.315473533 |
| CD96   | -0.726909569 | 10.08592960 | -4.17829026  | $9.20 \times 10^{-5}$ | $8.91 \times 10^{-3}$ | 1.288794322 |
| HIP1   | 0.501854846  | 8.737991581 | 4.177136150  | $9.24 \times 10^{-5}$ | $8.91 \times 10^{-3}$ | 1.285181002 |
| ITGAM  | 0.745889075  | 11.03684166 | 4.164267447  | $9.66 \times 10^{-5}$ | $9.21 \times 10^{-3}$ | 1.244927989 |
| VPREB3 | -0.951895663 | 9.172800544 | -4.163232822 | $9.69 \times 10^{-5}$ | $9.21 \times 10^{-3}$ | 1.241694635 |
| ZNF337 | -0.675543103 | 9.753698169 | -4.156411601 | $9.92 \times 10^{-5}$ | $9.36 \times 10^{-3}$ | 1.220388276 |
| TLR2   | 0.628105845  | 8.959213908 | 4.144295126  | $1.03 \times 10^{-4}$ | $9.38 \times 10^{-3}$ | 1.182588991 |
| ITK    | -0.807013633 | 11.25601337 | -4.144193675 | $1.03 \times 10^{-4}$ | $9.38 \times 10^{-3}$ | 1.182272752 |
| RPS15  | -0.502347777 | 14.49812513 | -4.143220606 | $1.04 \times 10^{-4}$ | $9.38 \times 10^{-3}$ | 1.179239766 |

|         |              |             |              |                       |                       |             |
|---------|--------------|-------------|--------------|-----------------------|-----------------------|-------------|
| STX2    | -0.699725387 | 9.419590750 | -4.142617824 | $1.04 \times 10^{-4}$ | $9.38 \times 10^{-3}$ | 1.177361132 |
| NT5C2   | 0.744904275  | 11.68280968 | 4.141801928  | $1.04 \times 10^{-4}$ | $9.38 \times 10^{-3}$ | 1.174818545 |
| ABCA1   | 0.852319744  | 10.97058563 | 4.137227249  | $1.06 \times 10^{-4}$ | $9.47 \times 10^{-3}$ | 1.160567503 |
| DSC2    | 0.773169539  | 9.838781567 | 4.135116727  | $1.07 \times 10^{-4}$ | $9.47 \times 10^{-3}$ | 1.153995713 |
| TMEM91  | 0.634004948  | 11.39348416 | 4.130594948  | $1.08 \times 10^{-4}$ | $9.50 \times 10^{-3}$ | 1.139921900 |
| EVL     | -0.715562616 | 12.29742633 | -4.108664636 | $1.17 \times 10^{-4}$ | $9.91 \times 10^{-3}$ | 1.071785269 |
| LRRFIP1 | 0.759566083  | 12.61637356 | 4.108612307  | $1.17 \times 10^{-4}$ | $9.91 \times 10^{-3}$ | 1.071622923 |
| ANKRD22 | 0.744159626  | 8.771170977 | 4.103643928  | $1.19 \times 10^{-4}$ | $1.00 \times 10^{-2}$ | 1.056214331 |
| BIRC2   | 0.722663272  | 11.18712878 | 4.100818677  | $1.20 \times 10^{-4}$ | $1.01 \times 10^{-2}$ | 1.047456896 |
| PJA2    | 0.707324502  | 12.41447342 | 4.084885925  | $1.27 \times 10^{-4}$ | $1.06 \times 10^{-2}$ | 0.998132900 |
| NFIL3   | 0.757529878  | 9.921038544 | 4.078323670  | $1.30 \times 10^{-4}$ | $1.07 \times 10^{-2}$ | 0.977848837 |
| FOLR3   | 1.077168812  | 11.49517146 | 4.074779058  | $1.31 \times 10^{-4}$ | $1.07 \times 10^{-2}$ | 0.966899952 |
| PREX1   | 0.607908552  | 9.749016217 | 4.073018041  | $1.32 \times 10^{-4}$ | $1.07 \times 10^{-2}$ | 0.961462358 |
| ARHGAP9 | 0.613248758  | 13.27244276 | 4.071912059  | $1.32 \times 10^{-4}$ | $1.07 \times 10^{-2}$ | 0.958048025 |
| MT1X    | -0.641432961 | 10.56494161 | -4.070806746 | $1.33 \times 10^{-4}$ | $1.07 \times 10^{-2}$ | 0.954636275 |
| S100A12 | 1.230167668  | 13.02283695 | 4.067171092  | $1.35 \times 10^{-4}$ | $1.07 \times 10^{-2}$ | 0.943417836 |
| ECHDC2  | -0.783780395 | 10.86752609 | -4.059394784 | $1.38 \times 10^{-4}$ | $1.09 \times 10^{-2}$ | 0.919441566 |

|         |              |             |              |                       |                       |             |
|---------|--------------|-------------|--------------|-----------------------|-----------------------|-------------|
| VCL     | 0.600381300  | 12.44172599 | 4.058201765  | $1.39 \times 10^{-4}$ | $1.09 \times 10^{-2}$ | 0.915765477 |
| TRIB1   | 0.591517385  | 10.80842557 | 4.044507382  | $1.45 \times 10^{-4}$ | $1.11 \times 10^{-2}$ | 0.873612091 |
| ABTB1   | 0.589945556  | 12.42443191 | 4.044398321  | $1.45 \times 10^{-4}$ | $1.11 \times 10^{-2}$ | 0.873276707 |
| CRIP2   | -0.531173121 | 8.341980742 | -4.036961686 | $1.49 \times 10^{-4}$ | $1.14 \times 10^{-2}$ | 0.850419667 |
| AXIN2   | -0.675591681 | 8.668162981 | -4.03438197  | $1.50 \times 10^{-4}$ | $1.14 \times 10^{-2}$ | 0.842496281 |
| ANPEP   | 0.579865663  | 10.67498298 | 4.030287070  | $1.52 \times 10^{-4}$ | $1.14 \times 10^{-2}$ | 0.829925022 |
| GIMAP5  | -0.697981733 | 11.69262762 | -4.027050045 | $1.54 \times 10^{-4}$ | $1.14 \times 10^{-2}$ | 0.819992549 |
| ICAM2   | -0.583074444 | 12.08920588 | -4.023979204 | $1.56 \times 10^{-4}$ | $1.14 \times 10^{-2}$ | 0.810574177 |
| SLC16A3 | 0.583722881  | 12.62895397 | 4.016267648  | $1.60 \times 10^{-4}$ | $1.16 \times 10^{-2}$ | 0.786940597 |
| KLHL3   | -0.600523551 | 9.121320998 | -4.015450151 | $1.60 \times 10^{-4}$ | $1.16 \times 10^{-2}$ | 0.784436726 |
| LMNB1   | 0.611682680  | 9.644592852 | 4.013182329  | $1.62 \times 10^{-4}$ | $1.16 \times 10^{-2}$ | 0.777492257 |
| TLE4    | 0.631554540  | 10.92947460 | 4.013166753  | $1.62 \times 10^{-4}$ | $1.16 \times 10^{-2}$ | 0.777444567 |
| MCEMP1  | 0.926548500  | 11.37859780 | 4.005370661  | $1.66 \times 10^{-4}$ | $1.18 \times 10^{-2}$ | 0.753588683 |
| NUP214  | 0.569345853  | 12.76505000 | 4.001863835  | $1.68 \times 10^{-4}$ | $1.19 \times 10^{-2}$ | 0.742866507 |
| CD14    | 0.542008082  | 14.57138408 | 3.987180455  | $1.76 \times 10^{-4}$ | $1.23 \times 10^{-2}$ | 0.698030274 |
| APBB1IP | 0.572053250  | 12.24035624 | 3.985355818  | $1.77 \times 10^{-4}$ | $1.23 \times 10^{-2}$ | 0.692465286 |
| SH3GLB1 | 0.597999777  | 11.63978592 | 3.983902649  | $1.78 \times 10^{-4}$ | $1.23 \times 10^{-2}$ | 0.688034293 |

|          |              |             |              |                       |                       |             |
|----------|--------------|-------------|--------------|-----------------------|-----------------------|-------------|
| CYP1B1   | 0.881390669  | 9.982442182 | 3.980997107  | $1.80 \times 10^{-4}$ | $1.23 \times 10^{-2}$ | 0.679177516 |
| UBR2     | 0.552456738  | 10.5277304  | 3.980827728  | $1.80 \times 10^{-4}$ | $1.23 \times 10^{-2}$ | 0.678661324 |
| SIGLEC5  | 0.646227210  | 9.690175101 | 3.979951500  | $1.81 \times 10^{-4}$ | $1.23 \times 10^{-2}$ | 0.675991172 |
| DPYD     | 0.808793434  | 9.904453391 | 3.976379702  | $1.83 \times 10^{-4}$ | $1.23 \times 10^{-2}$ | 0.665110237 |
| RALBP1   | 0.555729410  | 10.24953316 | 3.976046321  | $1.83 \times 10^{-4}$ | $1.23 \times 10^{-2}$ | 0.664094931 |
| TNFRSF4  | -0.560227809 | 9.199197807 | -3.97275922  | $1.85 \times 10^{-4}$ | $1.23 \times 10^{-2}$ | 0.654086740 |
| PRAM1    | 0.595335557  | 10.07749995 | 3.969866106  | $1.87 \times 10^{-4}$ | $1.24 \times 10^{-2}$ | 0.645282070 |
| LILRB2   | 0.622824624  | 11.53150578 | 3.962543922  | $1.91 \times 10^{-4}$ | $1.26 \times 10^{-2}$ | 0.623014887 |
| CD3D     | -0.834318687 | 12.7802033  | -3.960567255 | $1.93 \times 10^{-4}$ | $1.26 \times 10^{-2}$ | 0.617007807 |
| SELL     | 0.589864532  | 13.50320198 | 3.956594289  | $1.95 \times 10^{-4}$ | $1.27 \times 10^{-2}$ | 0.604939236 |
| WAS      | 0.532603634  | 13.44754353 | 3.949259572  | $2.00 \times 10^{-4}$ | $1.29 \times 10^{-2}$ | 0.582677226 |
| BCAS4    | -0.610567213 | 9.316271931 | -3.949148186 | $2.00 \times 10^{-4}$ | $1.29 \times 10^{-2}$ | 0.582339335 |
| FCGR1A   | 0.748027728  | 9.45999958  | 3.947174613  | $2.02 \times 10^{-4}$ | $1.29 \times 10^{-2}$ | 0.576353430 |
| CTBS     | 0.665185245  | 11.79689975 | 3.940829617  | $2.06 \times 10^{-4}$ | $1.31 \times 10^{-2}$ | 0.557120656 |
| MTF1     | 0.534117005  | 10.18848833 | 3.912548800  | $2.26 \times 10^{-4}$ | $1.41 \times 10^{-2}$ | 0.471616548 |
| SLC25A42 | -0.614787389 | 10.37174491 | -3.911466702 | $2.27 \times 10^{-4}$ | $1.41 \times 10^{-2}$ | 0.468352108 |
| SIAH2    | 0.539841009  | 10.05354723 | 3.905535823  | $2.32 \times 10^{-4}$ | $1.42 \times 10^{-2}$ | 0.450469436 |

|          |              |             |              |                       |                       |             |
|----------|--------------|-------------|--------------|-----------------------|-----------------------|-------------|
| PTEN     | 0.573807080  | 11.50332695 | 3.898138289  | $2.37 \times 10^{-4}$ | $1.44 \times 10^{-2}$ | 0.428186928 |
| RYBP     | 0.528423831  | 11.74045857 | 3.884256196  | $2.49 \times 10^{-4}$ | $1.50 \times 10^{-2}$ | 0.386439272 |
| LY9      | -0.718019984 | 9.535456446 | -3.881111526 | $2.51 \times 10^{-4}$ | $1.50 \times 10^{-2}$ | 0.376994543 |
| PLXNC1   | 0.593721210  | 9.478013108 | 3.880821021  | $2.51 \times 10^{-4}$ | $1.50 \times 10^{-2}$ | 0.376122266 |
| OSCAR    | 0.548400685  | 10.18880829 | 3.867275532  | $2.63 \times 10^{-4}$ | $1.56 \times 10^{-2}$ | 0.335493341 |
| SLC22A15 | 0.551680365  | 9.249239798 | 3.860092458  | $2.69 \times 10^{-4}$ | $1.59 \times 10^{-2}$ | 0.313982417 |
| PGD      | 0.604049725  | 12.40950954 | 3.855173523  | $2.74 \times 10^{-4}$ | $1.60 \times 10^{-2}$ | 0.299265598 |
| PTAFR    | 0.506257979  | 9.664804667 | 3.849028191  | $2.79 \times 10^{-4}$ | $1.62 \times 10^{-2}$ | 0.280895306 |
| BAZ1A    | 0.695030922  | 11.12836568 | 3.848675499  | $2.80 \times 10^{-4}$ | $1.62 \times 10^{-2}$ | 0.279841533 |
| PELI2    | 0.523414384  | 10.17822713 | 3.847060364  | $2.81 \times 10^{-4}$ | $1.62 \times 10^{-2}$ | 0.275016571 |
| TLR4     | 0.608470691  | 10.08513134 | 3.844288134  | $2.84 \times 10^{-4}$ | $1.63 \times 10^{-2}$ | 0.266737797 |
| XK       | 0.654257254  | 8.782982523 | 3.820674234  | $3.07 \times 10^{-4}$ | $1.72 \times 10^{-2}$ | 0.196364387 |
| LY96     | 1.105776610  | 12.48146277 | 3.816421517  | $3.11 \times 10^{-4}$ | $1.73 \times 10^{-2}$ | 0.183718326 |
| TIMP2    | 0.555990054  | 11.28732099 | 3.811279393  | $3.16 \times 10^{-4}$ | $1.76 \times 10^{-2}$ | 0.168438847 |
| TGM3     | 0.530718700  | 9.015260935 | 3.803175718  | $3.25 \times 10^{-4}$ | $1.79 \times 10^{-2}$ | 0.144384617 |
| FAM102A  | -0.657047729 | 10.1545936  | -3.802700859 | $3.25 \times 10^{-4}$ | $1.79 \times 10^{-2}$ | 0.142976049 |
| PRCP     | 0.521108685  | 12.92564252 | 3.798622457  | $3.30 \times 10^{-4}$ | $1.81 \times 10^{-2}$ | 0.130882737 |

|          |              |             |             |                       |                       |              |
|----------|--------------|-------------|-------------|-----------------------|-----------------------|--------------|
| IGF2BP2  | 0.701030412  | 10.43070156 | 3.795387751 | $3.33 \times 10^{-4}$ | $1.82 \times 10^{-2}$ | 0.121296760  |
| ACSL1    | 1.081345352  | 12.26603832 | 3.788414631 | $3.41 \times 10^{-4}$ | $1.83 \times 10^{-2}$ | 0.100648959  |
| PLOD1    | 0.563014637  | 10.83059083 | 3.787354297 | $3.42 \times 10^{-4}$ | $1.83 \times 10^{-2}$ | 0.097511274  |
| WSB1     | 0.692789777  | 10.83923317 | 3.786932135 | $3.43 \times 10^{-4}$ | $1.83 \times 10^{-2}$ | 0.096262181  |
| SLC40A1  | 0.657957057  | 11.08945481 | 3.784165810 | $3.46 \times 10^{-4}$ | $1.83 \times 10^{-2}$ | 0.088079290  |
| PAK2     | 0.580688966  | 10.83788437 | 3.783929428 | $3.46 \times 10^{-4}$ | $1.83 \times 10^{-2}$ | 0.087380233  |
| AHCTF1   | 0.549606248  | 9.679971091 | 3.783899287 | $3.46 \times 10^{-4}$ | $1.83 \times 10^{-2}$ | 0.087291099  |
| PGLYRP1  | 0.769526315  | 10.98820217 | 3.782115056 | $3.48 \times 10^{-4}$ | $1.83 \times 10^{-2}$ | 0.082015435  |
| JMJD1C   | 0.734612344  | 11.07165236 | 3.778774577 | $3.52 \times 10^{-4}$ | $1.85 \times 10^{-2}$ | 0.072142298  |
| SH3BGRL2 | 0.611657714  | 9.378795091 | 3.771804670 | $3.60 \times 10^{-4}$ | $1.87 \times 10^{-2}$ | 0.051559155  |
| ORM1     | 1.161483118  | 10.08948353 | 3.770803558 | $3.61 \times 10^{-4}$ | $1.87 \times 10^{-2}$ | 0.048604634  |
| ROPN1L   | 0.531580819  | 9.780983107 | 3.770096442 | $3.62 \times 10^{-4}$ | $1.87 \times 10^{-2}$ | 0.046518056  |
| MAN2A2   | 0.512537538  | 9.558128166 | 3.769497936 | $3.63 \times 10^{-4}$ | $1.87 \times 10^{-2}$ | 0.044752153  |
| MFSD1    | 0.623459874  | 11.59909818 | 3.765745168 | $3.67 \times 10^{-4}$ | $1.88 \times 10^{-2}$ | 0.033683456  |
| ICOS     | -0.592061079 | 9.349651597 | -3.75498123 | $3.80 \times 10^{-4}$ | $1.92 \times 10^{-2}$ | 0.001972983  |
| TM9SF2   | 0.673718183  | 11.77216932 | 3.752131986 | $3.84 \times 10^{-4}$ | $1.92 \times 10^{-2}$ | -0.006411537 |
| SSH2     | 0.541930094  | 12.04625025 | 3.741773866 | $3.97 \times 10^{-4}$ | $1.97 \times 10^{-2}$ | -0.036859558 |

|          |              |             |              |                       |                       |              |
|----------|--------------|-------------|--------------|-----------------------|-----------------------|--------------|
| SORT1    | 0.524620358  | 9.297101812 | 3.735045944  | $4.06 \times 10^{-4}$ | $2.00 \times 10^{-2}$ | -0.056608695 |
| CEACAM1  | 0.575898332  | 9.847045571 | 3.728259541  | $4.15 \times 10^{-4}$ | $2.03 \times 10^{-2}$ | -0.076507249 |
| TLR8     | 0.616469419  | 10.82622656 | 3.725976646  | $4.18 \times 10^{-4}$ | $2.03 \times 10^{-2}$ | -0.083195941 |
| GPR18    | -0.648191365 | 9.613920332 | -3.725774785 | $4.18 \times 10^{-4}$ | $2.03 \times 10^{-2}$ | -0.083787255 |
| IL32     | -0.751504226 | 11.08618797 | -3.723781593 | $4.21 \times 10^{-4}$ | $2.03 \times 10^{-2}$ | -0.089624871 |
| CD55     | 0.792438601  | 11.63153388 | 3.721632538  | $4.24 \times 10^{-4}$ | $2.04 \times 10^{-2}$ | -0.095916809 |
| ALPK1    | 0.584247929  | 10.39835485 | 3.715924480  | $4.32 \times 10^{-4}$ | $2.07 \times 10^{-2}$ | -0.112617743 |
| TPST1    | 0.786635404  | 8.986096996 | 3.710220892  | $4.40 \times 10^{-4}$ | $2.10 \times 10^{-2}$ | -0.129289693 |
| SKAP2    | 0.895931374  | 10.21958951 | 3.695677447  | $4.61 \times 10^{-4}$ | $2.17 \times 10^{-2}$ | -0.171728940 |
| TSPAN9   | 0.501792016  | 9.124731723 | 3.687780065  | $4.73 \times 10^{-4}$ | $2.19 \times 10^{-2}$ | -0.194730708 |
| MAP3K2   | 0.738737166  | 10.14236349 | 3.679062676  | $4.86 \times 10^{-4}$ | $2.25 \times 10^{-2}$ | -0.220085050 |
| HLA-DQB1 | -0.885879496 | 9.193510204 | -3.674758424 | $4.93 \times 10^{-4}$ | $2.27 \times 10^{-2}$ | -0.232589999 |
| BANF1    | -0.615422465 | 11.17214091 | -3.671212409 | $4.99 \times 10^{-4}$ | $2.27 \times 10^{-2}$ | -0.242885173 |
| TRIB2    | -0.605759767 | 9.689693072 | -3.665767936 | $5.08 \times 10^{-4}$ | $2.30 \times 10^{-2}$ | -0.258679989 |
| BCL11B   | -0.737988531 | 10.27618934 | -3.663348957 | $5.12 \times 10^{-4}$ | $2.30 \times 10^{-2}$ | -0.265692893 |
| NPEPPS   | 0.501503734  | 10.23836188 | 3.6590900810 | $5.19 \times 10^{-4}$ | $2.30 \times 10^{-2}$ | -0.278032787 |
| TCN1     | 0.748159542  | 9.733649963 | 3.656471578  | $5.23 \times 10^{-4}$ | $2.30 \times 10^{-2}$ | -0.285615284 |

|          |              |             |              |                       |                       |              |
|----------|--------------|-------------|--------------|-----------------------|-----------------------|--------------|
| HSPA1A   | 0.869551973  | 12.31988413 | 3.655562531  | $5.24 \times 10^{-4}$ | $2.30 \times 10^{-2}$ | -0.288246843 |
| NELL2    | -0.801162946 | 9.769262597 | -3.654116289 | $5.27 \times 10^{-4}$ | $2.30 \times 10^{-2}$ | -0.292432655 |
| TCEA3    | -0.599754387 | 9.027066357 | -3.651325565 | $5.32 \times 10^{-4}$ | $2.31 \times 10^{-2}$ | -0.300506801 |
| PHF21A   | 0.546848380  | 12.26535142 | 3.6370113300 | $5.57 \times 10^{-4}$ | $2.40 \times 10^{-2}$ | -0.341859510 |
| UBASH3A  | -0.55780803  | 9.418395788 | -3.634344675 | $5.61 \times 10^{-4}$ | $2.41 \times 10^{-2}$ | -0.349551894 |
| SNRK     | 0.613139367  | 12.22053817 | 3.624338927  | $5.80 \times 10^{-4}$ | $2.48 \times 10^{-2}$ | -0.378383081 |
| KPNB1    | 0.577223432  | 12.98598738 | 3.621333155  | $5.85 \times 10^{-4}$ | $2.50 \times 10^{-2}$ | -0.387034226 |
| RAB32    | 0.518172278  | 11.52654880 | 3.616468179  | $5.94 \times 10^{-4}$ | $2.52 \times 10^{-2}$ | -0.401026798 |
| E2F3     | 0.611764230  | 10.85128192 | 3.610720480  | $6.05 \times 10^{-4}$ | $2.54 \times 10^{-2}$ | -0.417542783 |
| KRT10    | -0.588531565 | 10.50700755 | -3.604111424 | $6.18 \times 10^{-4}$ | $2.56 \times 10^{-2}$ | -0.436513128 |
| OSBPL8   | 0.580463748  | 9.585979976 | 3.603375043  | $6.20 \times 10^{-4}$ | $2.56 \times 10^{-2}$ | -0.438625428 |
| ITPR3    | -0.733575257 | 10.55728577 | -3.602052315 | $6.22 \times 10^{-4}$ | $2.56 \times 10^{-2}$ | -0.442418963 |
| SERPINB1 | 0.541277656  | 11.98139995 | 3.601569105  | $6.23 \times 10^{-4}$ | $2.56 \times 10^{-2}$ | -0.443804571 |
| SLC11A1  | 0.815784850  | 13.01140674 | 3.586044498  | $6.55 \times 10^{-4}$ | $2.66 \times 10^{-2}$ | -0.488257986 |
| STX11    | 0.615640460  | 11.86577379 | 3.585678566  | $6.56 \times 10^{-4}$ | $2.66 \times 10^{-2}$ | -0.489304316 |
| BIN1     | -0.632129371 | 10.80490103 | -3.575639618 | $6.77 \times 10^{-4}$ | $2.73 \times 10^{-2}$ | -0.517982402 |
| CD79B    | -0.797301438 | 11.74653300 | -3.56126316  | $7.09 \times 10^{-4}$ | $2.83 \times 10^{-2}$ | -0.558961044 |

|         |              |             |              |                       |                       |              |
|---------|--------------|-------------|--------------|-----------------------|-----------------------|--------------|
| KCNJ2   | 0.531403251  | 10.91973748 | 3.561107300  | $7.09 \times 10^{-4}$ | $2.83 \times 10^{-2}$ | -0.559404723 |
| ANKRD33 | 0.614712221  | 9.948336100 | 3.560142783  | $7.11 \times 10^{-4}$ | $2.83 \times 10^{-2}$ | -0.562150084 |
| HK3     | 0.579692748  | 10.97421931 | 3.546191885  | $7.43 \times 10^{-4}$ | $2.93 \times 10^{-2}$ | -0.601805439 |
| TIMM22  | -0.546177428 | 10.33038405 | -3.54439159  | $7.47 \times 10^{-4}$ | $2.94 \times 10^{-2}$ | -0.606915411 |
| FKBP5   | 0.807399148  | 10.96828881 | 3.530691364  | $7.80 \times 10^{-4}$ | $3.01 \times 10^{-2}$ | -0.645746908 |
| ZNF548  | -0.551037393 | 8.930712206 | -3.528326902 | $7.86 \times 10^{-4}$ | $3.02 \times 10^{-2}$ | -0.652438752 |
| LEF1    | -0.758480512 | 11.00379102 | -3.528137554 | $7.87 \times 10^{-4}$ | $3.02 \times 10^{-2}$ | -0.652974513 |
| LIME1   | -0.663652921 | 12.31493043 | -3.519866087 | $8.07 \times 10^{-4}$ | $3.07 \times 10^{-2}$ | -0.676360373 |
| GAB2    | 0.545299220  | 10.45407265 | 3.516803551  | $8.15 \times 10^{-4}$ | $3.09 \times 10^{-2}$ | -0.685009959 |
| PFKFB4  | 0.546237041  | 12.15378511 | 3.508883029  | $8.36 \times 10^{-4}$ | $3.13 \times 10^{-2}$ | -0.707357195 |
| SAP30   | 0.755354659  | 9.714949992 | 3.508476972  | $8.37 \times 10^{-4}$ | $3.13 \times 10^{-2}$ | -0.708501968 |
| CD79A   | -0.744156904 | 9.153110785 | -3.502708357 | $8.52 \times 10^{-4}$ | $3.17 \times 10^{-2}$ | -0.724755712 |
| APAF1   | 0.622568149  | 11.58441989 | 3.499382039  | $8.61 \times 10^{-4}$ | $3.19 \times 10^{-2}$ | -0.734120014 |
| FPR1    | 0.537905350  | 14.15845289 | 3.496795772  | $8.68 \times 10^{-4}$ | $3.20 \times 10^{-2}$ | -0.741396874 |
| HBM     | 0.637978550  | 13.32613913 | 3.493550092  | $8.77 \times 10^{-4}$ | $3.21 \times 10^{-2}$ | -0.750524089 |
| TFDP1   | 0.519966636  | 10.58713668 | 3.486089376  | $8.98 \times 10^{-4}$ | $3.25 \times 10^{-2}$ | -0.771483291 |
| CDA     | 0.580040439  | 11.18770347 | 3.484857091  | $9.01 \times 10^{-4}$ | $3.25 \times 10^{-2}$ | -0.774942276 |

|          |              |             |              |                       |                       |              |
|----------|--------------|-------------|--------------|-----------------------|-----------------------|--------------|
| RPL3     | -0.669276857 | 14.22617940 | -3.484673732 | $9.02 \times 10^{-4}$ | $3.25 \times 10^{-2}$ | -0.775456889 |
| PTPRCAP  | -0.775584387 | 10.60824047 | -3.482937784 | $9.07 \times 10^{-4}$ | $3.25 \times 10^{-2}$ | -0.780328103 |
| RAB3IP   | -0.502832822 | 9.896296476 | -3.482791135 | $9.07 \times 10^{-4}$ | $3.25 \times 10^{-2}$ | -0.780739539 |
| MCL1     | 0.617071671  | 12.76297854 | 3.470444276  | $9.43 \times 10^{-4}$ | $3.36 \times 10^{-2}$ | -0.815338612 |
| FOS      | 0.629559023  | 10.41969758 | 3.465997496  | $9.56 \times 10^{-4}$ | $3.38 \times 10^{-2}$ | -0.827779719 |
| MAFB     | 0.633636057  | 10.49096756 | 3.465335629  | $9.58 \times 10^{-4}$ | $3.38 \times 10^{-2}$ | -0.829630573 |
| CDR2     | -0.559764678 | 9.647238764 | -3.465296435 | $9.58 \times 10^{-4}$ | $3.38 \times 10^{-2}$ | -0.829740167 |
| ADA      | -0.539734103 | 9.873420958 | -3.464072517 | $9.62 \times 10^{-4}$ | $3.38 \times 10^{-2}$ | -0.833162106 |
| USP15    | 0.575368377  | 10.12392951 | 3.450658206  | $1.00 \times 10^{-3}$ | $3.50 \times 10^{-2}$ | -0.870614410 |
| TXN      | 0.543364029  | 12.39163167 | 3.447717742  | $1.01 \times 10^{-3}$ | $3.52 \times 10^{-2}$ | -0.878811178 |
| DEXI     | -0.573719293 | 10.26636909 | -3.444984555 | $1.02 \times 10^{-3}$ | $3.54 \times 10^{-2}$ | -0.886425974 |
| CD19     | -0.73240579  | 9.232560779 | -3.442877993 | $1.03 \times 10^{-3}$ | $3.54 \times 10^{-2}$ | -0.892292213 |
| TNFRSF1B | 0.526075653  | 11.39716987 | 3.436711641  | $1.05 \times 10^{-3}$ | $3.60 \times 10^{-2}$ | -0.909450186 |
| UBE2G2   | -0.549153811 | 9.690903616 | -3.426786507 | $1.08 \times 10^{-3}$ | $3.69 \times 10^{-2}$ | -0.937023882 |
| PLEKHA1  | -0.657631742 | 10.68792693 | -3.420730422 | $1.10 \times 10^{-3}$ | $3.73 \times 10^{-2}$ | -0.953822490 |
| STXBP5   | 0.512064004  | 9.748952987 | 3.414788229  | $1.12 \times 10^{-3}$ | $3.78 \times 10^{-2}$ | -0.970285821 |
| SLAMF1   | -0.590997004 | 9.182707692 | -3.412638995 | $1.13 \times 10^{-3}$ | $3.79 \times 10^{-2}$ | -0.976235721 |

|         |              |             |              |                       |                       |              |
|---------|--------------|-------------|--------------|-----------------------|-----------------------|--------------|
| PTGS1   | 0.513158288  | 9.755553602 | 3.407850997  | $1.14 \times 10^{-3}$ | $3.81 \times 10^{-2}$ | -0.989481678 |
| MX2     | 0.538188945  | 11.88748328 | 3.400787498  | $1.17 \times 10^{-3}$ | $3.89 \times 10^{-2}$ | -1.008999950 |
| TLR5    | 0.568807899  | 10.19797405 | 3.395476281  | $1.19 \times 10^{-3}$ | $3.92 \times 10^{-2}$ | -1.023658251 |
| SNRPF   | -0.62900432  | 11.62261145 | -3.392708951 | $1.20 \times 10^{-3}$ | $3.94 \times 10^{-2}$ | -1.031289618 |
| CD2     | -0.692648316 | 12.08743742 | -3.392066977 | $1.20 \times 10^{-3}$ | $3.94 \times 10^{-2}$ | -1.033059367 |
| MPP1    | 0.525559482  | 11.69750178 | 3.383661215  | $1.23 \times 10^{-3}$ | $4.01 \times 10^{-2}$ | -1.056210909 |
| SLC31A2 | 0.555300583  | 12.05336321 | 3.383199083  | $1.24 \times 10^{-3}$ | $4.01 \times 10^{-2}$ | -1.057482607 |
| HP      | 0.600047514  | 8.510285497 | 3.377475418  | $1.26 \times 10^{-3}$ | $4.06 \times 10^{-2}$ | -1.073223304 |
| LTA     | -0.507086059 | 9.494721240 | -3.376499478 | $1.26 \times 10^{-3}$ | $4.06 \times 10^{-2}$ | -1.075905445 |
| GPR160  | 0.595161439  | 9.218585625 | 3.369440584  | $1.29 \times 10^{-3}$ | $4.12 \times 10^{-2}$ | -1.095289497 |
| RNF10   | 0.518530338  | 10.29470400 | 3.362612401  | $1.32 \times 10^{-3}$ | $4.17 \times 10^{-2}$ | -1.114013809 |
| KLHL8   | 0.500976047  | 10.56567956 | 3.357445084  | $1.34 \times 10^{-3}$ | $4.21 \times 10^{-2}$ | -1.128166514 |
| HK2     | 0.850958881  | 9.633000951 | 3.338977691  | $1.41 \times 10^{-3}$ | $4.41 \times 10^{-2}$ | -1.178625382 |
| RNASEL  | 0.579371564  | 10.56856312 | 3.335922634  | $1.43 \times 10^{-3}$ | $4.43 \times 10^{-2}$ | -1.186954462 |
| G6PD    | 0.524565626  | 9.664007827 | 3.334364884  | $1.43 \times 10^{-3}$ | $4.43 \times 10^{-2}$ | -1.191199389 |
| NCF2    | 0.686199556  | 11.79204525 | 3.333278129  | $1.44 \times 10^{-3}$ | $4.43 \times 10^{-2}$ | -1.194160030 |
| TMEM71  | 0.512751737  | 12.74731282 | 3.323391416  | $1.48 \times 10^{-3}$ | $4.47 \times 10^{-2}$ | -1.221064006 |

|         |              |             |              |                       |                       |              |
|---------|--------------|-------------|--------------|-----------------------|-----------------------|--------------|
| SPOCK2  | -0.608293459 | 12.42610318 | -3.319090607 | $1.50 \times 10^{-3}$ | $4.49 \times 10^{-2}$ | -1.232750369 |
| FCGR1B  | 0.679388793  | 10.50334914 | 3.318418269  | $1.51 \times 10^{-3}$ | $4.49 \times 10^{-2}$ | -1.234576338 |
| BEX2    | -0.572599146 | 9.572822126 | -3.316739298 | $1.51 \times 10^{-3}$ | $4.49 \times 10^{-2}$ | -1.239135061 |
| DYRK2   | -0.631503982 | 11.67469829 | -3.316236583 | $1.52 \times 10^{-3}$ | $4.49 \times 10^{-2}$ | -1.240499720 |
| EEF1G   | -0.597939912 | 13.95641696 | -3.315055299 | $1.52 \times 10^{-3}$ | $4.49 \times 10^{-2}$ | -1.243705848 |
| KLF12   | -0.508911564 | 8.762043497 | -3.309282281 | $1.55 \times 10^{-3}$ | $4.54 \times 10^{-2}$ | -1.259363108 |
| RPS4X   | -0.640920636 | 13.68371163 | -3.308779203 | $1.55 \times 10^{-3}$ | $4.54 \times 10^{-2}$ | -1.260726641 |
| CUTA    | -0.581317922 | 11.80180266 | -3.298888907 | $1.60 \times 10^{-3}$ | $4.59 \times 10^{-2}$ | -1.287504062 |
| GYG1    | 0.576045868  | 11.49528676 | 3.290359437  | $1.64 \times 10^{-3}$ | $4.69 \times 10^{-2}$ | -1.310552691 |
| ANXA3   | 0.771039911  | 8.952888281 | 3.284491447  | $1.67 \times 10^{-3}$ | $4.75 \times 10^{-2}$ | -1.326385419 |
| USP10   | 0.579438475  | 11.15228531 | 3.284442439  | $1.67 \times 10^{-3}$ | $4.75 \times 10^{-2}$ | -1.326517568 |
| PTGS2   | 0.634048298  | 11.04747211 | 3.281018060  | $1.69 \times 10^{-3}$ | $4.78 \times 10^{-2}$ | -1.335747928 |
| RALB    | 0.506347863  | 12.76588024 | 3.272783234  | $1.73 \times 10^{-3}$ | $4.84 \times 10^{-2}$ | -1.357917440 |
| NDUFA12 | -0.529595446 | 11.34624052 | -3.270135594 | $1.74 \times 10^{-3}$ | $4.86 \times 10^{-2}$ | -1.365037111 |
| VNN1    | 0.527088430  | 8.949546607 | 3.262644846  | $1.78 \times 10^{-3}$ | $4.94 \times 10^{-2}$ | -1.385158508 |
| NDUFS8  | -0.525359369 | 11.30377264 | -3.261196541 | $1.79 \times 10^{-3}$ | $4.94 \times 10^{-2}$ | -1.389045195 |
| CDC25B  | -0.591407531 | 11.17144322 | -3.254412975 | $1.83 \times 10^{-3}$ | $5.01 \times 10^{-2}$ | -1.407233640 |

|         |              |              |              |                       |                       |              |
|---------|--------------|--------------|--------------|-----------------------|-----------------------|--------------|
| LRG1    | 0.597316538  | 11.09921136  | 3.250555708  | $1.85 \times 10^{-3}$ | $5.03 \times 10^{-2}$ | -1.417564168 |
| PCSK7   | -0.549608021 | 10.26229492  | -3.228250977 | $1.98 \times 10^{-3}$ | $5.27 \times 10^{-2}$ | -1.477132664 |
| CD58    | 0.654046772  | 10.68344116  | 3.218775782  | $2.03 \times 10^{-3}$ | $5.40 \times 10^{-2}$ | -1.502350722 |
| SIPA1L2 | 0.646586497  | 9.697462483  | 3.217934743  | $2.04 \times 10^{-3}$ | $5.41 \times 10^{-2}$ | -1.504586616 |
| HIGD2A  | -0.550681803 | 11.91680773  | -3.214377748 | $2.06 \times 10^{-3}$ | $5.42 \times 10^{-2}$ | -1.514038310 |
| KYNU    | 0.597906913  | 10.47531818  | 3.214191832  | $2.06 \times 10^{-3}$ | $5.42 \times 10^{-2}$ | -1.514532125 |
| ELOVL5  | 0.697733291  | 11.66879773  | 3.209185333  | $2.09 \times 10^{-3}$ | $5.45 \times 10^{-2}$ | -1.527822449 |
| IL18RAP | 0.718031904  | 12.30407505  | 3.197661714  | $2.17 \times 10^{-3}$ | $5.52 \times 10^{-2}$ | -1.558357714 |
| LRP10   | 0.610862505  | 10.88194882  | 3.197222203  | $2.17 \times 10^{-3}$ | $5.52 \times 10^{-2}$ | -1.559520796 |
| SLC2A14 | 0.594543556  | 8.803628868  | 3.197129549  | $2.17 \times 10^{-3}$ | $5.52 \times 10^{-2}$ | -1.559765973 |
| IFNGR1  | 0.537262955  | 12.740170500 | 3.196920242  | $2.17 \times 10^{-3}$ | $5.52 \times 10^{-2}$ | -1.560319812 |
| GZMM    | -0.640473643 | 9.721133072  | -3.180034500 | $2.28 \times 10^{-3}$ | $5.70 \times 10^{-2}$ | -1.604916008 |
| SNRPN   | -0.591413046 | 11.20069254  | -3.179857061 | $2.28 \times 10^{-3}$ | $5.70 \times 10^{-2}$ | -1.605383747 |
| GNAI3   | 0.565972875  | 10.15247432  | 3.179809833  | $2.28 \times 10^{-3}$ | $5.70 \times 10^{-2}$ | -1.605508239 |
| PPP3CC  | -0.575068778 | 9.535317094  | -3.178427409 | $2.29 \times 10^{-3}$ | $5.71 \times 10^{-2}$ | -1.609151709 |
| OLFM4   | 0.983692357  | 9.037760722  | 3.162340404  | $2.41 \times 10^{-3}$ | $5.91 \times 10^{-2}$ | -1.651467287 |
| RNF24   | 0.523124106  | 11.18650364  | 3.156580918  | $2.45 \times 10^{-3}$ | $5.96 \times 10^{-2}$ | -1.666580012 |

|         |              |             |              |                       |                       |              |
|---------|--------------|-------------|--------------|-----------------------|-----------------------|--------------|
| DNAJA3  | -0.570248342 | 10.44818669 | -3.154307832 | $2.46 \times 10^{-3}$ | $5.96 \times 10^{-2}$ | -1.672539119 |
| DCP2    | 0.539773046  | 11.70424764 | 3.152893636  | $2.47 \times 10^{-3}$ | $5.96 \times 10^{-2}$ | -1.676245023 |
| ALDH1A1 | 0.725241161  | 9.186603645 | 3.152829211  | $2.48 \times 10^{-3}$ | $5.96 \times 10^{-2}$ | -1.676413820 |
| CAPZA2  | 0.566017425  | 12.38902537 | 3.149169541  | $2.50 \times 10^{-3}$ | $6.01 \times 10^{-2}$ | -1.685998345 |
| NPTN    | 0.527746359  | 12.35544598 | 3.144091421  | $2.54 \times 10^{-3}$ | $6.08 \times 10^{-2}$ | -1.699284566 |
| SNX10   | 0.825447807  | 10.67207463 | 3.140509567  | $2.57 \times 10^{-3}$ | $6.11 \times 10^{-2}$ | -1.708646788 |
| MAP4K1  | -0.561067219 | 10.37524318 | -3.119413603 | $2.73 \times 10^{-3}$ | $6.36 \times 10^{-2}$ | -1.763632074 |
| CEACAM6 | 0.660131021  | 8.339562165 | 3.113130970  | $2.78 \times 10^{-3}$ | $6.44 \times 10^{-2}$ | -1.779955919 |
| PUS1    | -0.513936340 | 10.48627474 | -3.107049936 | $2.83 \times 10^{-3}$ | $6.53 \times 10^{-2}$ | -1.795733397 |
| EMILIN2 | 0.504703518  | 10.65608782 | 3.106209063  | $2.84 \times 10^{-3}$ | $6.54 \times 10^{-2}$ | -1.797913327 |
| SKAP1   | -0.540133587 | 9.790059741 | -3.101685513 | $2.88 \times 10^{-3}$ | $6.58 \times 10^{-2}$ | -1.809633145 |
| IFIT2   | 0.671682848  | 12.87039377 | 3.099470754  | $2.90 \times 10^{-3}$ | $6.61 \times 10^{-2}$ | -1.815366749 |
| RPSA    | -0.540544521 | 15.00192307 | -3.088850724 | $2.99 \times 10^{-3}$ | $6.75 \times 10^{-2}$ | -1.842818949 |
| F2RL1   | 0.609326020  | 9.823608160 | 3.080988912  | $3.06 \times 10^{-3}$ | $6.83 \times 10^{-2}$ | -1.863097388 |
| CD3E    | -0.602926878 | 9.754132065 | -3.072958927 | $3.13 \times 10^{-3}$ | $6.98 \times 10^{-2}$ | -1.883770933 |
| GZMK    | -0.825087966 | 11.40827082 | -3.068981104 | $3.16 \times 10^{-3}$ | $7.05 \times 10^{-2}$ | -1.893997505 |
| GRN     | 0.535750942  | 11.44078944 | 3.065837227  | $3.19 \times 10^{-3}$ | $7.09 \times 10^{-2}$ | -1.902073279 |

|         |              |             |              |                       |                       |              |
|---------|--------------|-------------|--------------|-----------------------|-----------------------|--------------|
| CD46    | 0.535352541  | 12.08394434 | 3.050809930  | $3.34 \times 10^{-3}$ | $7.29 \times 10^{-2}$ | -1.940591125 |
| FCGR2A  | 0.636226045  | 12.18948590 | 3.030714903  | $3.54 \times 10^{-3}$ | $7.52 \times 10^{-2}$ | -1.991882561 |
| DEGS1   | 0.574533804  | 11.79324656 | 3.017418503  | $3.67 \times 10^{-3}$ | $7.68 \times 10^{-2}$ | -2.025684362 |
| RNF149  | 0.702288999  | 10.78561871 | 3.008176536  | $3.77 \times 10^{-3}$ | $7.78 \times 10^{-2}$ | -2.049114751 |
| ALDH2   | 0.510263257  | 10.15588934 | 3.004399094  | $3.81 \times 10^{-3}$ | $7.82 \times 10^{-2}$ | -2.058676157 |
| RTN3    | 0.880964975  | 10.87035354 | 2.996746044  | $3.90 \times 10^{-3}$ | $7.91 \times 10^{-2}$ | -2.078020309 |
| KLHL2   | 0.721194555  | 9.608155985 | 2.994135193  | $3.93 \times 10^{-3}$ | $7.93 \times 10^{-2}$ | -2.084611273 |
| FNBP4   | -0.558312167 | 11.45896001 | -2.99174063  | $3.95 \times 10^{-3}$ | $7.96 \times 10^{-2}$ | -2.090652500 |
| FCGR3B  | 1.155245803  | 12.25997843 | 2.981861149  | $4.07 \times 10^{-3}$ | $8.09 \times 10^{-2}$ | -2.115539604 |
| ZYX     | 0.514293361  | 10.81538552 | 2.977850162  | $4.11 \times 10^{-3}$ | $8.12 \times 10^{-2}$ | -2.125626177 |
| PLEKHF1 | -0.530004378 | 10.25747363 | -2.976672374 | $4.13 \times 10^{-3}$ | $8.12 \times 10^{-2}$ | -2.128586092 |
| FGR     | 0.505586237  | 12.16961993 | 2.976341624  | $4.13 \times 10^{-3}$ | $8.12 \times 10^{-2}$ | -2.129417150 |
| IL2RB   | -0.648169401 | 11.02085239 | -2.961285566 | $4.31 \times 10^{-3}$ | $8.37 \times 10^{-2}$ | -2.167175091 |
| MPO     | 0.535001474  | 8.491599276 | 2.960183104  | $4.33 \times 10^{-3}$ | $8.38 \times 10^{-2}$ | -2.169934283 |
| FBL     | -0.569803272 | 11.48797184 | -2.958391420 | $4.35 \times 10^{-3}$ | $8.39 \times 10^{-2}$ | -2.174416801 |
| IFRD1   | 0.630839160  | 10.26078713 | 2.953553039  | $4.41 \times 10^{-3}$ | $8.49 \times 10^{-2}$ | -2.186511598 |
| KBTBD7  | 0.700187986  | 9.946022511 | 2.946288942  | $4.50 \times 10^{-3}$ | $8.54 \times 10^{-2}$ | -2.204642421 |

|          |              |             |              |                       |                       |              |
|----------|--------------|-------------|--------------|-----------------------|-----------------------|--------------|
| CEACAM8  | 0.845016021  | 9.077506316 | 2.944039827  | $4.53 \times 10^{-3}$ | $8.57 \times 10^{-2}$ | -2.210249354 |
| LILRA3   | 0.676039830  | 12.00178807 | 2.941860833  | $4.56 \times 10^{-3}$ | $8.59 \times 10^{-2}$ | -2.215678431 |
| CHSY1    | 0.544803113  | 11.27136277 | 2.936378821  | $4.63 \times 10^{-3}$ | $8.66 \times 10^{-2}$ | -2.229323882 |
| CD1D     | 0.535561890  | 10.09155223 | 2.922544372  | $4.81 \times 10^{-3}$ | $8.91 \times 10^{-2}$ | -2.263675028 |
| SERINC1  | 0.557664054  | 10.07695803 | 2.920430504  | $4.84 \times 10^{-3}$ | $8.91 \times 10^{-2}$ | -2.268913096 |
| BNIP3L   | 0.922405427  | 9.677605035 | 2.916184530  | $4.90 \times 10^{-3}$ | $8.91 \times 10^{-2}$ | -2.279425843 |
| PARP9    | 0.675678729  | 9.344892312 | 2.916116387  | $4.90 \times 10^{-3}$ | $8.91 \times 10^{-2}$ | -2.279594465 |
| KLF4     | 0.553345790  | 9.534695859 | 2.910048789  | $4.99 \times 10^{-3}$ | $8.99 \times 10^{-2}$ | -2.294597248 |
| HIF1A    | 0.904031953  | 9.795312771 | 2.898696368  | $5.15 \times 10^{-3}$ | $9.17 \times 10^{-2}$ | -2.322604238 |
| ARPC5    | 0.588527731  | 13.66818103 | 2.895064614  | $5.20 \times 10^{-3}$ | $9.23 \times 10^{-2}$ | -2.331546562 |
| RPL13A   | -0.586093343 | 12.69125001 | -2.894231309 | $5.21 \times 10^{-3}$ | $9.23 \times 10^{-2}$ | -2.333597185 |
| CD247    | -0.593283173 | 13.38254244 | -2.893226773 | $5.23 \times 10^{-3}$ | $9.23 \times 10^{-2}$ | -2.336068590 |
| APOBEC3A | 1.143514167  | 10.52699839 | 2.884315077  | $5.36 \times 10^{-3}$ | $9.33 \times 10^{-2}$ | -2.357965194 |
| CA1      | 0.768110982  | 10.71515644 | 2.881738836  | $5.40 \times 10^{-3}$ | $9.36 \times 10^{-2}$ | -2.364285684 |
| RPAIN    | -0.526542779 | 11.17831747 | -2.880388631 | $5.42 \times 10^{-3}$ | $9.37 \times 10^{-2}$ | -2.367596541 |
| LGALS2   | 0.541274967  | 9.264333514 | 2.879623873  | $5.43 \times 10^{-3}$ | $9.37 \times 10^{-2}$ | -2.369471295 |
| JAZF1    | 0.50426168   | 9.969274884 | 2.872536258  | $5.54 \times 10^{-3}$ | $9.50 \times 10^{-2}$ | -2.386828211 |

|         |              |             |              |                       |                       |              |
|---------|--------------|-------------|--------------|-----------------------|-----------------------|--------------|
| HLA-DOB | -0.564954764 | 9.439658005 | -2.869803271 | $5.58 \times 10^{-3}$ | $9.52 \times 10^{-2}$ | -2.393512400 |
| CYBB    | 0.506134205  | 10.86458424 | 2.869540457  | $5.59 \times 10^{-3}$ | $9.52 \times 10^{-2}$ | -2.394154922 |
| ITGB7   | -0.514799763 | 10.76859133 | -2.86493482  | $5.66 \times 10^{-3}$ | $9.56 \times 10^{-2}$ | -2.405407448 |
| ABLM1   | -0.532583787 | 11.04588029 | -2.864726768 | $5.66 \times 10^{-3}$ | $9.56 \times 10^{-2}$ | -2.405915439 |
| CD7     | -0.503256017 | 11.45088991 | -2.833849982 | $6.17 \times 10^{-3}$ | $1.00 \times 10^{-1}$ | -2.480994988 |
| HDAC4   | 0.634232893  | 9.803953593 | 2.832950370  | $6.18 \times 10^{-3}$ | $1.00 \times 10^{-1}$ | -2.483173185 |
| ALPL    | 0.610024002  | 13.19972068 | 2.827260525  | $6.28 \times 10^{-3}$ | $1.01 \times 10^{-1}$ | -2.496937571 |
| PSG9    | 0.523416660  | 9.118818903 | 2.824703720  | $6.33 \times 10^{-3}$ | $1.01 \times 10^{-1}$ | -2.503115894 |
| CYP27A1 | 0.500648046  | 10.50205713 | 2.819070156  | $6.43 \times 10^{-3}$ | $1.02 \times 10^{-1}$ | -2.516713897 |
| B3GNT5  | 0.517611221  | 8.296045122 | 2.817592225  | $6.45 \times 10^{-3}$ | $1.02 \times 10^{-1}$ | -2.520277811 |
| GOLGA8B | -0.637166471 | 11.37021656 | -2.809246306 | $6.60 \times 10^{-3}$ | $1.03 \times 10^{-1}$ | -2.540376497 |
| RGS18   | 0.616985759  | 12.29950949 | 2.800443594  | $6.77 \times 10^{-3}$ | $1.05 \times 10^{-1}$ | -2.561525714 |
| DUSP6   | 0.739607436  | 11.07834836 | 2.796132848  | $6.85 \times 10^{-3}$ | $1.05 \times 10^{-1}$ | -2.571864044 |
| S100A11 | 0.582810409  | 12.87235341 | 2.793256421  | $6.90 \times 10^{-3}$ | $1.06 \times 10^{-1}$ | -2.578755687 |
| PPBP    | 0.773773448  | 10.95230936 | 2.784207672  | $7.07 \times 10^{-3}$ | $1.07 \times 10^{-1}$ | -2.600400045 |
| CLC     | -0.686850305 | 13.06564912 | -2.769883539 | $7.36 \times 10^{-3}$ | $1.10 \times 10^{-1}$ | -2.634552340 |
| KLRB1   | -0.606491109 | 12.66852025 | -2.769264193 | $7.37 \times 10^{-3}$ | $1.10 \times 10^{-1}$ | -2.636025949 |

|         |              |             |              |                       |                       |              |
|---------|--------------|-------------|--------------|-----------------------|-----------------------|--------------|
| CD52    | -0.509904777 | 14.04965056 | -2.75801895  | $7.60 \times 10^{-3}$ | $1.11 \times 10^{-1}$ | -2.662737459 |
| MBNL3   | 0.543991041  | 9.154172843 | 2.750087095  | $7.76 \times 10^{-3}$ | $1.13 \times 10^{-1}$ | -2.681527888 |
| CD3G    | -0.529851087 | 9.703681659 | -2.749967566 | $7.77 \times 10^{-3}$ | $1.13 \times 10^{-1}$ | -2.681810730 |
| ZFP36L1 | 0.874638620  | 12.21461533 | 2.749388081  | $7.78 \times 10^{-3}$ | $1.13 \times 10^{-1}$ | -2.683181829 |
| BPI     | 0.527075167  | 8.597301058 | 2.749049320  | $7.79 \times 10^{-3}$ | $1.13 \times 10^{-1}$ | -2.683983257 |
| CLIP1   | 0.534750628  | 10.56371020 | 2.747819911  | $7.81 \times 10^{-3}$ | $1.13 \times 10^{-1}$ | -2.686891102 |
| MTMR6   | 0.614003877  | 10.02673675 | 2.740732041  | $7.96 \times 10^{-3}$ | $1.15 \times 10^{-1}$ | -2.703635928 |
| GLRX    | 0.526729066  | 11.79240083 | 2.734647485  | $8.10 \times 10^{-3}$ | $1.16 \times 10^{-1}$ | -2.717983675 |
| NRGN    | 0.564695544  | 10.88120716 | 2.730680510  | $8.18 \times 10^{-3}$ | $1.17 \times 10^{-1}$ | -2.727324693 |
| NKG7    | -0.589135234 | 13.58608363 | -2.727297225 | $8.26 \times 10^{-3}$ | $1.17 \times 10^{-1}$ | -2.735282965 |
| MEGF9   | 0.699684171  | 9.579070400 | 2.726572425  | $8.28 \times 10^{-3}$ | $1.17 \times 10^{-1}$ | -2.736986865 |
| CREB1   | 0.518339197  | 12.67378994 | 2.725578407  | $8.30 \times 10^{-3}$ | $1.17 \times 10^{-1}$ | -2.739323082 |
| DHRS9   | 0.586094146  | 11.46934538 | 2.714177947  | $8.56 \times 10^{-3}$ | $1.20 \times 10^{-1}$ | -2.766069861 |
| SEMA3E  | 0.562563737  | 11.8550451  | 2.706317031  | $8.74 \times 10^{-3}$ | $1.21 \times 10^{-1}$ | -2.784461513 |
| SLAMF6  | -0.540019499 | 11.68092604 | -2.705730387 | $8.75 \times 10^{-3}$ | $1.21 \times 10^{-1}$ | -2.785832374 |
| DGAT2   | 0.531467314  | 9.434640900 | 2.703672146  | $8.80 \times 10^{-3}$ | $1.22 \times 10^{-1}$ | -2.790640200 |
| P2RY10  | -0.510438681 | 9.452767581 | -2.668522759 | $9.67 \times 10^{-3}$ | $1.28 \times 10^{-1}$ | -2.872302560 |

|         |              |             |              |                       |                       |              |
|---------|--------------|-------------|--------------|-----------------------|-----------------------|--------------|
| SYNJ1   | 0.532761748  | 9.612661793 | 2.667308402  | $9.70 \times 10^{-3}$ | $1.28 \times 10^{-1}$ | -2.875108865 |
| SAMD3   | -0.571760005 | 10.30571470 | -2.660486403 | $9.88 \times 10^{-3}$ | $1.29 \times 10^{-1}$ | -2.890855401 |
| NMI     | 0.502295887  | 11.44065141 | 2.648175718  | $1.02 \times 10^{-2}$ | $1.32 \times 10^{-1}$ | -2.919190451 |
| IFIT3   | 0.628934979  | 10.56047784 | 2.633022469  | $1.06 \times 10^{-2}$ | $1.34 \times 10^{-1}$ | -2.953925527 |
| PIK3CG  | 0.503054704  | 10.32306648 | 2.631203018  | $1.07 \times 10^{-2}$ | $1.34 \times 10^{-1}$ | -2.958085560 |
| RAB8B   | 0.537845437  | 12.11751828 | 2.627793315  | $1.08 \times 10^{-2}$ | $1.35 \times 10^{-1}$ | -2.965875444 |
| CTSG    | 0.551468287  | 8.656080456 | 2.626394493  | $1.08 \times 10^{-2}$ | $1.35 \times 10^{-1}$ | -2.969068908 |
| STAT1   | 0.533913907  | 11.06164363 | 2.625980993  | $1.08 \times 10^{-2}$ | $1.35 \times 10^{-1}$ | -2.970012656 |
| CHST13  | 0.525909712  | 10.62265212 | 2.623834300  | $1.09 \times 10^{-2}$ | $1.35 \times 10^{-1}$ | -2.974910251 |
| MOSPD2  | 0.539271871  | 8.875886296 | 2.614027053  | $1.12 \times 10^{-2}$ | $1.37 \times 10^{-1}$ | -2.997244653 |
| IFI27   | 0.759505571  | 9.594216592 | 2.606686754  | $1.14 \times 10^{-2}$ | $1.38 \times 10^{-1}$ | -3.013917491 |
| CAMP    | 0.746840874  | 11.96859103 | 2.596938385  | $1.17 \times 10^{-2}$ | $1.41 \times 10^{-1}$ | -3.036002348 |
| PKN2    | 0.601079162  | 9.689182846 | 2.575548608  | $1.24 \times 10^{-2}$ | $1.45 \times 10^{-1}$ | -3.084229293 |
| FCHO2   | 0.528750937  | 8.900178133 | 2.568831348  | $1.26 \times 10^{-2}$ | $1.45 \times 10^{-1}$ | -3.099308698 |
| TDP1    | 0.571928798  | 11.42352272 | 2.567020698  | $1.26 \times 10^{-2}$ | $1.45 \times 10^{-1}$ | -3.103367982 |
| TMEM154 | 0.537112767  | 13.10906265 | 2.560535268  | $1.29 \times 10^{-2}$ | $1.47 \times 10^{-1}$ | -3.117888801 |
| LCN2    | 0.625223046  | 10.39095453 | 2.534132664  | $1.38 \times 10^{-2}$ | $1.52 \times 10^{-1}$ | -3.176699245 |

|        |              |             |              |                       |                       |              |
|--------|--------------|-------------|--------------|-----------------------|-----------------------|--------------|
| HMGB2  | 0.874840351  | 11.53745581 | 2.529746842  | $1.39 \times 10^{-2}$ | $1.53 \times 10^{-1}$ | -3.186420899 |
| RPS23  | -0.596968333 | 11.13546631 | -2.507092290 | $1.48 \times 10^{-2}$ | $1.58 \times 10^{-1}$ | -3.236420565 |
| LYST   | 0.523168979  | 10.53566199 | 2.496471850  | $1.52 \times 10^{-2}$ | $1.60 \times 10^{-1}$ | -3.259735019 |
| CD36   | 0.525275655  | 10.59538817 | 2.487628059  | $1.55 \times 10^{-2}$ | $1.62 \times 10^{-1}$ | -3.279088021 |
| RSAD2  | 0.767088357  | 9.546385504 | 2.462665844  | $1.65 \times 10^{-2}$ | $1.68 \times 10^{-1}$ | -3.333411734 |
| HBE1   | 0.528404754  | 11.21351978 | 2.448165905  | $1.72 \times 10^{-2}$ | $1.70 \times 10^{-1}$ | -3.364761822 |
| HERC5  | 0.655149877  | 11.49871026 | 2.436747846  | $1.77 \times 10^{-2}$ | $1.73 \times 10^{-1}$ | -3.389342048 |
| OLR1   | 0.50578578   | 8.325704431 | 2.405941807  | $1.91 \times 10^{-2}$ | $1.80 \times 10^{-1}$ | -3.455189159 |
| RTN4   | 0.680501753  | 10.59758867 | 2.399137457  | $1.94 \times 10^{-2}$ | $1.81 \times 10^{-1}$ | -3.469640333 |
| MCOLN2 | -0.509634281 | 9.609511595 | -2.364092589 | $2.12 \times 10^{-2}$ | $1.90 \times 10^{-1}$ | -3.543533390 |
| RAB33B | 0.744309220  | 9.915100572 | 2.317912902  | $2.37 \times 10^{-2}$ | $2.02 \times 10^{-1}$ | -3.639524911 |
| IFITM3 | 0.681443644  | 12.59672991 | 2.310569702  | $2.41 \times 10^{-2}$ | $2.04 \times 10^{-1}$ | -3.654643323 |
| CHPT1  | 0.520280927  | 10.28161166 | 2.268281645  | $2.67 \times 10^{-2}$ | $2.17 \times 10^{-1}$ | -3.740924386 |
| EVI2A  | 0.562718475  | 9.588294378 | 2.252784291  | $2.78 \times 10^{-2}$ | $2.21 \times 10^{-1}$ | -3.772208208 |
| DEFA4  | 0.830428337  | 10.13773256 | 2.248782824  | $2.80 \times 10^{-2}$ | $2.22 \times 10^{-1}$ | -3.780256409 |
| TLR1   | 0.770148813  | 11.00155489 | 2.234610906  | $2.90 \times 10^{-2}$ | $2.25 \times 10^{-1}$ | -3.808663330 |
| CD8A   | -0.61393698  | 11.16120349 | -2.217456758 | $3.02 \times 10^{-2}$ | $2.30 \times 10^{-1}$ | -3.842844582 |

|          |             |             |             |                       |                       |              |
|----------|-------------|-------------|-------------|-----------------------|-----------------------|--------------|
| SP3      | 0.755921211 | 9.715499214 | 2.211895494 | $3.06 \times 10^{-2}$ | $2.31 \times 10^{-1}$ | -3.853877975 |
| HEBP2    | 0.530398708 | 11.72638342 | 2.209314811 | $3.08 \times 10^{-2}$ | $2.32 \times 10^{-1}$ | -3.858989990 |
| YY1      | 0.726228833 | 10.64998976 | 2.186296003 | $3.25 \times 10^{-2}$ | $2.38 \times 10^{-1}$ | -3.904362835 |
| IFIT1    | 0.706185212 | 10.88436391 | 2.177611472 | $3.32 \times 10^{-2}$ | $2.41 \times 10^{-1}$ | -3.921375903 |
| TSC22D1  | 0.517089231 | 8.967049553 | 2.168577420 | $3.39 \times 10^{-2}$ | $2.42 \times 10^{-1}$ | -3.939012351 |
| BLVRB    | 0.634705152 | 11.57670912 | 2.153614587 | $3.51 \times 10^{-2}$ | $2.48 \times 10^{-1}$ | -3.968085177 |
| PPP3CA   | 0.548525777 | 9.008399961 | 2.132316352 | $3.69 \times 10^{-2}$ | $2.53 \times 10^{-1}$ | -4.009170140 |
| EPSTI1   | 0.583571066 | 11.42074264 | 2.118580072 | $3.81 \times 10^{-2}$ | $2.57 \times 10^{-1}$ | -4.035481778 |
| PIK3AP1  | 0.676025509 | 9.911334703 | 2.107319708 | $3.91 \times 10^{-2}$ | $2.59 \times 10^{-1}$ | -4.056941650 |
| AGTPBP1  | 0.656499009 | 8.750152214 | 2.105879435 | $3.92 \times 10^{-2}$ | $2.60 \times 10^{-1}$ | -4.059679397 |
| KCTD12   | 0.644809613 | 8.510877438 | 2.097395696 | $4.00 \times 10^{-2}$ | $2.63 \times 10^{-1}$ | -4.075772966 |
| GNA13    | 0.647152996 | 10.43047894 | 2.082940518 | $4.13 \times 10^{-2}$ | $2.66 \times 10^{-1}$ | -4.103065028 |
| ALAS2    | 0.520840893 | 10.32626062 | 2.077750771 | $4.18 \times 10^{-2}$ | $2.67 \times 10^{-1}$ | -4.112823694 |
| HLA-DRB1 | 0.980083338 | 10.01572995 | 2.070916290 | $4.25 \times 10^{-2}$ | $2.69 \times 10^{-1}$ | -4.125642915 |
| XRCC2    | 0.555954079 | 12.39471373 | 2.068652051 | $4.27 \times 10^{-2}$ | $2.70 \times 10^{-1}$ | -4.129881807 |
| S100P    | 0.601027821 | 12.16304704 | 2.068202506 | $4.27 \times 10^{-2}$ | $2.70 \times 10^{-1}$ | -4.130722923 |
| BCL2A1   | 0.674833782 | 8.924530322 | 2.041939096 | $4.53 \times 10^{-2}$ | $2.76 \times 10^{-1}$ | -4.179587317 |

|        |             |             |            |                       |                       |              |
|--------|-------------|-------------|------------|-----------------------|-----------------------|--------------|
| FKBP14 | 0.554114838 | 13.11274493 | 2.03129938 | $4.64 \times 10^{-2}$ | $2.78 \times 10^{-1}$ | -4.199228454 |
| RAD21  | 0.680852572 | 10.80459264 | 2.02628861 | $4.70 \times 10^{-2}$ | $2.79 \times 10^{-1}$ | -4.208447478 |

FC, fold change; adj., adjusted.

**Table SXI.** Key targets of GE in the treatment of IS were obtained by a cross set of drug targets of active components of GE, IS disease targets, and DEGs.

| Drug     | IS      | DEGs     | Drug and IS | Drug and DEGs | IS and DEGs | Drug and IS and DEGs |
|----------|---------|----------|-------------|---------------|-------------|----------------------|
| CYP51A1  | NOTCH3  | VNN2     | AR          | CDC25B        | F5          | HMGCR                |
| NPC1L1   | MT-TL1  | KCNJ15   | NR1H3       | MCL1          | ABCA1       | G6PD                 |
| RORA     | ALOX5AP | CKAP4    | CYP17A1     | ALDH1A1       | HIF1A       | TBXAS1               |
| SERPINA6 | FBN1    | CRISPLD2 | RORC        | PYGL          | OLR1        | PTAFR                |
| NR1I3    | LDLR    | MARCKS   | CYP19A1     | CDA           | ADM         | CA1                  |
| CES2     | MTHFR   | ANTXR2   | ESR2        | PGD           | CREB1       | CA4                  |
| CDC25A   | GP1BA   | FGL2     | ESR1        | CLEC4E        | PPBP        | DUSP1                |
| DHCR7    | COL4A1  | SIRPB1   | SHBG        | ACOX1         | F13A1       | PIK3CG               |
| GLRA1    | ENG     | LHFPL2   | SREBF2      | NCOA1         | PTEN        | MPO                  |
| SQLE     | CRP     | DYSF     | CYP2C19     | PLEKHA1       | ITGA2B      | MMP9                 |
| UGT2B7   | MT-ND1  | RRAGD    | SLC6A2      | TNFSF13B      | CD14        | ALPL                 |
| POLB     | APOE    | CTSZ     | BCHE        |               | LTA         | STAT3                |
| PREP     | IL6     | PLXDC2   | PTPN1       |               | HSPA1A      | MGAM                 |
| MDM4     | MT-ND5  | RAB27A   | SLC6A4      |               | RTN4        | IGF2R                |
| CHRM4    | MT-ND6  | ID3      | CHRM2       |               | HLA-DRB1    | ADA                  |
| AKR1B10  | AGT     | SORL1    | ACHE        |               | HP          | HK2                  |
| ACACB    | ADA2    | BAZ2B    | VDR         |               | HLA-DQB1    | ALOX5                |
| SCD      | MT-ND4  | CTSS     | NR1H2       |               | FCGR2A      | PTGS1                |
| ALK      | MT-CO1  | FBN2     | PTGER1      |               | SERPINA1    | ALDH2                |
| TOP2A    | PDE4D   | CORO1C   | PTGER2      |               | GRN         | PTGS2                |
| AVPR1A   | ACTA2   | ETS2     | HSD11B1     |               | TLR2        | HDAC4                |
| MTNR1A   | PLAT    | STK3     | PPARD       |               | FOS         | TDP1                 |

|        |          |            |         |           |        |
|--------|----------|------------|---------|-----------|--------|
| MTNR1B | NPPA     | PDK4       | PTPN6   | CD36      | GAA    |
| CHRM5  | MT-ATP6  | PACSIN2    | FDFT1   | MYH9      | SELL   |
| CA7    | GLA      | SRPK1      | NOS2    | ITGAM     | LY96   |
| CA12   | NPPB     | RAB31      | NR3C1   | SORT1     | PPP3CA |
| CA14   | CST3     | SESN3      | SHH     | CD163     | PPP3R1 |
| CA9    | PON1     | CTTN       | HSD11B2 | ARG1      | TLR4   |
| CA6    | ADAMTS13 | HAL        | DRD2    | FCGR3B    | LGALS2 |
| CA5A   | IL1B     | TSEN34     | PTGER4  | IRS2      | PLOD1  |
| NAT1   | HTRA1    | LILRB3     | IDO1    | IGF2BP2   | APRT   |
| ALPG   | RNF213   | IQGAP1     | CCR1    | KYNU      | LCN2   |
| AKR1C3 | VWF      | RASSF2     | MDM2    | THBS1     |        |
| PIM1   | APOH     | SDCBP      | SIGMAR1 | LAMP2     |        |
| HDAC3  | SERPINC1 | CLEC4D     | ATP12A  | TIMP2     |        |
| CA5B   | COL4A2   | FLT3LG     | PTGIR   | TNFRSF1B  |        |
| CISD1  | MT-CO2   | BASP1      | PRKCG   | CYP1B1    |        |
| TPMT   | BDNF     | NUMB       | PRKCD   | TXN       |        |
| IMPDH2 | GUCY1A1  | MTMR3      | PRKCB   | VASP      |        |
| MKNK1  | FGA      | NDEL1      | PRKCE   | CD79A     |        |
| ASF1A  | APP      | ATP6V1B2   | PRKCQ   | CYBB      |        |
| TUBB1  | APOB     | IRAK3      | FABP4   | KIAA0319L |        |
| TYMS   | LPA      | ST6GALNAC6 | FABP3   | SLC2A3    |        |
| ADCY5  | F7       | NCR3       | FABP5   | TNFSF10   |        |
| DAO    | MT-CO3   | HECW2      | FABP1   | TRIB1     |        |
| PIM3   | PTGIS    | B4GALT5    | PTGES   | CXCL16    |        |
| PRKD2  | TP53     | RBP7       | PTPN2   | EIF2AK2   |        |
| FBP1   | IL10     | MFGE8      | ADORA3  | PROS1     |        |

|         |              |         |         |        |
|---------|--------------|---------|---------|--------|
| POLA1   | ELN          | PPP4R1  | MAPK3   | ITPR3  |
| HDAC8   | THBD         | MANSC1  | PTPN11  | TLR8   |
| METAP1  | PON2         | CEBPD   | KCNA5   | PRCP   |
| LRRK2   | CXCL12       | CD6     | PTPRF   | CYBRD1 |
| KDM5C   | PRKG1        | PASK    | PLA2G1B | DOCK8  |
| KDM4B   | SERPINA3     | REPS2   | ACPI    | KLF4   |
| KDM5B   | PROZ         | P2RX1   | BACE1   | CD8A   |
| KDM4A   | LMNA         | ARID3A  | HTR2B   | APAF1  |
| SRD5A2  | EDN1         | SUSD3   | GRM2    | NT5C2  |
| HDAC5   | TGFB2        | HSDL2   | BACE2   | VEGFB  |
| HDAC7   | SOD2         | MXD1    | MGLL    | STAT1  |
| CTSV    | VKORC1       | CD8B    | PRKCH   | AQP9   |
| DAPK3   | CDKN2B-AS1   | MTPN    | TACR1   | ITPK1  |
| FFAR1   | MYH11        | MAL     | PPARA   | TCN1   |
| PHF8    | ENO2         | ATP6V1A | F2R     | BIN1   |
| HSD17B3 | RNF213-AS1   | STOM    | IGF1R   | NRGN   |
| KDM2A   | FGF          | RNF13   | SRC     | TLR5   |
| GPBAR1  | ACTA2-AS1    | GCA     | KDR     | ORM1   |
| GABRA2  | P2RY12       | SNURF   | AGTR1   | IL2RB  |
| FNTA    | LOX          | ECHDC3  | AVPR2   | LMNB1  |
| HAO1    | COL3A1       | ABHD5   | IL6ST   | CTNNA1 |
| PTGFR   | PECAM1       | CD96    | MAPK14  | S100P  |
| GSTK1   | SMAD3        | HIP1    | ERN1    | CD46   |
| NR0B2   | MYLK         | VPREB3  | CA2     | NPL    |
| CDC45   | LOC102723566 | ZNF337  | CA3     | MAFB   |
| CYP26A1 | ACVRL1       | ITK     | PTPRC   | RGS2   |

|          |         |         |        |         |
|----------|---------|---------|--------|---------|
| RARG     | ANGPT1  | RPS15   | EP300  | BANF1   |
| RARB     | SMAD4   | STX2    | TTR    | TSPAN9  |
| RARA     | GSR     | TMEM91  | PLAA   | NDST1   |
| CYP26B1  | TGFBR2  | EVL     | MMP1   | ERGIC1  |
| RXRG     | PROCR   | ANKRD22 | MB     | GPR160  |
| CACNA2D1 | SLC2A10 | BIRC2   | ACE    | CAPZA2  |
| RXRB     | NGB     | PJA2    | FUT7   | CD55    |
| SAE1     | ADIPOQ  | NFIL3   | PDE5A  | KLHL3   |
| RORB     | TGFBR1  | FOLR3   | PTPN22 | GNS     |
| PTGDR2   | PF4     | PREX1   | KCNMA1 | CEACAM1 |
| AKR1C1   | HSPA4   | ARHGAP9 | FYN    | VCL     |
| ENPP2    | ENPP1   | MT1X    | LCK    | NCF2    |
| STS      | AVP     | ECHDC2  | PIK3CD | FBL     |
| PRKAG1   | SH2B3   | ABTB1   | PRKDC  | SEMA3E  |
| THRA     | PIK3C2A | CRIP2   | VCAM1  | CPD     |
| THRB     | AQP4    | AXIN2   | SLC9A1 | DEFA4   |
| DGAT1    | HMGB1   | GIMAP5  | COMT   | MCEMP1  |
| PTGES2   | CYCS    | ICAM2   | CHRNA7 | PADI4   |
| CDK1     | MAP2    | SLC16A3 | MMP2   | C5AR1   |
| LGALS4   | MPL     | TLE4    | MAOB   | UBE2G2  |
| LGALS8   | KCNQ1   | NUP214  | GRM5   | MTF1    |
| AHCY     | GJA1    | APBB1IP | HDAC6  | CTSG    |
| TREH     | GNB3    | SH3GLB1 | HCAR2  | IFRD1   |
| GLRA2    | F9      | UBR2    | MMP8   | MPP1    |
| GGH      | AKT1    | SIGLEC5 | MMP3   | LRRFIP1 |
| SSTR5    | TNNI3   | DPYD    | PIK3CA | IL32    |

|        |          |          |          |         |
|--------|----------|----------|----------|---------|
| SSTR2  | TNNT2    | RALBP1   | CTSL     | IL7R    |
| SSTR1  | ABCC6    | TNFRSF4  | AOC3     | YY1     |
| SSTR3  | EPOR     | PRAM1    | MAPK9    | FCGR1A  |
| NEU3   | TNFRSF1A | LILRB2   | MME      | E2F3    |
| NEU2   | APOA1    | CD3D     | HMOX1    | CDR2    |
| NEU4   | CCL2     | WAS      | PRKD1    | CD58    |
| AMY2A  | SERPINI1 | BCAS4    | TGM2     | PAK1    |
| SI     | MALAT1   | CTBS     | PARP1    | SLC22A4 |
| CA13   | SERPINF2 | SLC25A42 | SERPINE1 | SLC11A1 |
| LAP3   | IGF1     | SIAH2    | CNR1     | CD52    |
| MLNR   | CXCR4    | RYBP     | CNR2     | LRG1    |
| DTYMK  | GATA4    | LY9      | CHRM1    | DSC2    |
| ACLY   | MT-CYB   | PLXNC1   | CES1     | ACTN1   |
| SLC6A1 | SULT1A3  | OSCAR    | MAPK1    | CCR7    |
| GABRA1 | MBP      | SLC22A15 | ALB      | S100A12 |
| GABRA3 | GP6      | BAZ1A    | ABL1     | VNN1    |
| GABRR1 | NES      | PELI2    | FABP2    | IFNGR1  |
| KDM3A  | ADD1     | XK       | SLC22A6  | GLRX    |
| KDM5A  | THPO     | TGM3     | NR1H4    | CAMP    |
| KDM4D  | GDNF     | FAM102A  | GABBR1   | ANPEP   |
| KDM4C  | ITGA2    | ACSL1    | LTA4H    | BPI     |
| RNPEP  | TET2     | WSB1     | PPARG    | ITGB7   |
| KDM6B  | TH       | SLC40A1  | RXRA     | CREG1   |
| KDM4E  | TSPO     | PAK2     | FAAH     | TLN1    |
| S1PR5  | CCL3     | AHCTF1   | TERT     | BCL2A1  |
| S1PR4  | BMP7     | PGLYRP1  | FFAR4    | IFIT3   |

|         |                |          |          |         |
|---------|----------------|----------|----------|---------|
| PFKFB3  | SIRT1          | JMJD1C   | SLC16A1  | RPSA    |
| PPM1B   | ANXA5          | SH3BGRL2 | ALOX15   | TAOK1   |
| PPP1CC  | CALR           | ROPN1L   | ALOX12   | S100A11 |
| PPP2R5A | CXCL8          | MAN2A2   | EPHX2    | BNIP3L  |
| HPGD    | TGFB3          | MFSD1    | ABCC1    | TFDP1   |
| GPR119  | TREX1          | ICOS     | ABCB1    | IL18RAP |
| FASN    | SPP1           | TM9SF2   | PLA2G4A  |         |
| PDK1    | NKX2-5         | SSH2     | PLG      |         |
| PDE4B   | ENTPD1         | GPR18    | ITGAL    |         |
| PRF1    | ACTC1          | ALPK1    | TBXA2R   |         |
| FLT3    | MFAP5          | TPST1    | HNF4A    |         |
| AURKB   | F12            | SKAP2    | PGR      |         |
| AURKA   | NFE2L2         | MAP3K2   | TRPA1    |         |
| HSD17B1 | CD40LG         | TRIB2    | RBP4     |         |
| CLK1    | SOD1           | BCL11B   | GCG      |         |
| DYRK1B  | MYBPC3         | NPEPPS   | PTGDR    |         |
| HSD17B2 | MAT2A          | NELL2    | PSEN2    |         |
| LDHA    | AGTR2          | TCEA3    | PTGER3   |         |
| LDHB    | IL1RN          | PHF21A   | ADRA2B   |         |
| AKR1C2  | FOXE3          | UBASH3A  | HSP90AA1 |         |
| GABRB3  | IL4            | SNRK     | VEGFA    |         |
| GSTA1   | RPL36A-HNRNPH2 | KPNB1    | FGF1     |         |
| GPR35   | DCX            | RAB32    | HPSE     |         |
| TACR2   | KNG1           | KRT10    | FGF2     |         |
| GRM3    | TNFRSF12A      | OSBPL8   | LGALS3   |         |
| GRIK5   | MIAT           | SERPINB1 | ADRA2A   |         |

|         |          |         |         |
|---------|----------|---------|---------|
| GRM4    | SERPIND1 | STX11   | ADRA2C  |
| GRIA4   | HEY2     | CD79B   | DRD1    |
| GRIK3   | MYH7     | KCNJ2   | ADRA1D  |
| GRM6    | TGFB1    | ANKRD33 | HTR2A   |
| GRK6    | SON      | HK3     | HTR2C   |
| HCK     | CASP9    | TIMM22  | DRD3    |
| CCR9    | BRCC3    | FKBP5   | CYP2D6  |
| YWHAG   | HHT4     | ZNF548  | HTR6    |
| CPB1    | GATA6    | LEF1    | ADRA1A  |
| ESRRB   | CBS      | LIME1   | HTR1B   |
| FCER2   | AIF1     | GAB2    | FOLH1   |
| OGT     | RETN     | PFKFB4  | TRPV1   |
| UQCRB   | DARS2    | SAP30   | PYGM    |
| MAP3K12 | SMAD2    | FPR1    | PYGB    |
| PSMB5   | NDE1     | HBM     | OPRK1   |
| KCNA4   | PMM2     | RPL3    | IL2     |
| NQO2    | F8       | PTPRCAP | NAALAD2 |
| SRD5A1  | NTF3     | RAB3IP  | SCN9A   |
| DUSP3   | MIR21    | USP15   | SSTR4   |
| CXCR1   | CYP3A5   | DEXI    | OGA     |
| UPP1    | EPO      | CD19    | ECE1    |
| HRH4    | MIR155   | STXBP5  | KMO     |
| HPRT1   | IL18     | SLAMF1  | BCL2L1  |
| GRK1    | POLG     | MX2     | ADORA2A |
| GNPAT   | PRNP     | SNRPF   | ADORA1  |
| PLA2G4B | ACTB     | CD2     | PPM1A   |

|         |              |         |         |
|---------|--------------|---------|---------|
| IMPDH1  | IL1A         | SLC31A2 | AKR1B1  |
| EIF4A1  | CETP         | RNF10   | KCNH2   |
| AMY1A   | ZMPSTE24     | KLHL8   | OPRM1   |
| LGALS7  | MYH6         | RNASEL  | CASP3   |
| CCKBR   | GFAP         | TMEM71  | TYR     |
| FPGS    | APOC3        | SPOCK2  | FUCA1   |
| PTPRA   | LEP          | FCGR1B  | GBA     |
| MAGI3   | LIPC         | BEX2    | HK1     |
| DNMT3B  | BGN          | DYRK2   | LGALS9  |
| SLC10A2 | RBFOX3       | EEF1G   | ATP1A1  |
| SLC28A3 | PKD1         | KLF12   | ABCB11  |
| CD22    | NOTCH1       | RPS4X   | EGLN1   |
| GABRA4  | KRAS         | CUTA    | GABBR2  |
| GABRA5  | PROC         | GYG1    | SLC6A11 |
| GABRA6  | NF1          | ANXA3   | SLC6A13 |
| GABRB1  | TNFRSF11B    | USP10   | FTO     |
| GABRB2  | CALCA        | RALB    | EGLN2   |
| GABRD   | NPY          | NDUFA12 | EGLN3   |
| GABRE   | CDKN2A       | NDUFS8  | HIF1AN  |
| GABRG1  | F11          | PCSK7   | S1PR3   |
| GABRG2  | PITX2        | SIPA1L2 | S1PR1   |
| GABRG3  | FLVCR2       | HIGD2A  | FLT1    |
| GABRP   | NCF1         | ELOVL5  | MET     |
| GRIN2D  | AGER         | LRP10   | PPP2CA  |
| GRIN3A  | LOC113939944 | SLC2A14 | VCP     |
| LIP3    | CP           | GZMM    | MAOA    |

|             |         |         |         |
|-------------|---------|---------|---------|
| LSS         | AMPD1   | SNRPN   | ADORA2B |
| NCOA2       | FGG     | GNAI3   | CXCR3   |
| SULT2A1     | MIR146A | PPP3CC  | DRD4    |
| SULT2B1     | GDF15   | OLFM4   | JAK2    |
| PLA2G2E     | GNAQ    | RNF24   | CSF1R   |
| ACSL3       | KRIT1   | DNAJA3  | CHRM3   |
| ADH5        | DES     | DCP2    | TYRO3   |
| ARF6        | CCR2    | NPTN    | CYP2C9  |
| C8G         | PDE3A   | SNX10   | CYP3A4  |
| ECI2        | BRCA2   | MAP4K1  | MMP13   |
| ELOVL4      | NGF     | CEACAM6 | ADAM17  |
| GM2A        | KCNJ5   | PUS1    | ADRB2   |
| GUCA1A      | ATM     | EMILIN2 | ADRB1   |
| HNF4G       | WFS1    | SKAP1   | ADRB3   |
| LALBA       | CSF3    | IFIT2   | BRD4    |
| OGDH        | TBX20   | F2RL1   | HDAC1   |
| PKIA        | MMACHC  | CD3E    | PLK1    |
| PLA2G2D     | ZFHX3   | GZMK    | CCR5    |
| PMP2        | APOA5   | DEGS1   | REN     |
| PPA_RS05235 | GCKR    | RNF149  | HDAC2   |
| PPT1        | CYBA    | RTN3    | HTR4    |
| PVR         | C3      | KLHL2   | NPC1    |
| RCVRN       | CAPN3   | FNBP4   | ERBB2   |
| SCN1B       | DPM3    | ZYX     | EGFR    |
| SCN2B       | GPT     | PLEKHF1 | HTR1A   |
| SCN3B       | TTN     | FGR     | MAP2K1  |

|              |          |          |          |
|--------------|----------|----------|----------|
| SCN4B        | HFE      | KBTBD7   | SCN5A    |
| SCN7A        | CNTF     | CEACAM8  | KIT      |
| SEC14L2      | CTF1     | LILRA3   | ALDH5A1  |
| TM1468       | MTX2     | CHSY1    | ABAT     |
| TRAPPC3      | MYMY1    | CD1D     | DYRK1A   |
| AMY2B        | MYMY3    | SERINC1  | GSK3B    |
| ATOX1        | CITED2   | PARP9    | ESRRG    |
| BAMF_RS28815 | CCND1    | ARPC5    | CRHR1    |
| FHIT         | JAG1     | RPL13A   | BCL2     |
| FTL          | SRFBP1   | CD247    | ELANE    |
| GLT6D1       | PCSK9    | APOBEC3A | CFTR     |
| GNPDA1       | TCF7L2   | RPAIN    | F3       |
| KRTAP5-2     | MMUT     | JAZF1    | DPP4     |
| KRTAP5-3     | MEN1     | HLA-DOB  | SLC6A3   |
| LCTL         | CD34     | ABLIM1   | TAAR1    |
| LYZ          | CTLA4    | CD7      | SLC1A1   |
| NCAN         | TIMP1    | PSG9     | GRIK1    |
| NUDT9        | COL2A1   | CYP27A1  | GRIA1    |
| RTCB         | UCP2     | B3GNT5   | GRM8     |
| SIGLEC1      | PRL      | GOLGA8B  | GRIK2    |
| SMARCA5      | TMEM126B | RGS18    | GRM1     |
| TAS1R2       | INSL6    | DUSP6    | GRM7     |
| TM0024       | PRKAG2   | CLC      | GRIA2    |
| ACO2         | HLA-B    | KLRB1    | CPT1A    |
| ALAD         | GNB1     | MBNL3    | SLC1A2   |
| ASPH         | FLNA     | CD3G     | SLC22A12 |

|          |        |         |         |
|----------|--------|---------|---------|
| BBOX1    | RPS27A | ZFP36L1 | CDK2    |
| HSD17B6  | KL     | CLIP1   | EDNRA   |
| OXCT1    | CYP4F2 | MTMR6   | PLAU    |
| OXCT2    | CUX2   | NKG7    | CHEK1   |
| P3H1     | NINJ2  | MEGF9   | WEE1    |
| P3H2     | NSD1   | DHRS9   | EDNRB   |
| P3H3     | CSF2   | SLAMF6  | MTOR    |
| P4HA1    | FLNC   | DGAT2   | MMP14   |
| P4HA2    | MYMY4  | P2RY10  | PNMT    |
| PLOD3    | MAN2B1 | SYNJ1   | NPY5R   |
| SDHC     | GJA5   | SAMD3   | GCGR    |
| SDHD     | CPS1   | NMI     | ESRRA   |
| SLC13A1  | COL4A5 | RAB8B   | LNPEP   |
| SLC13A2  | NLRP3  | CHST13  | NFKBIA  |
| SLC13A3  | NPR3   | MOSPD2  | SYK     |
| SLC25A10 | IL17A  | IFI27   | BRAF    |
| SUCLA2   | CPB2   | PKN2    | JAK1    |
| SUCLG1   | XDH    | FCHO2   | MMP7    |
| SUCLG2   | CDKN2B | TMEM154 | PNP     |
| GLRA3    | ACAN   | HMGB2   | ILK     |
| NFKB2    | XBP1   | RPS23   | PLA2G7  |
| SLCO1B3  | FKRP   | LYST    | CYP11B1 |
| E        | PTX3   | RSAD2   | CYP11B2 |
| ERG11    | CAT    | HBE1    | DBH     |
| BC1747   | TANGO2 | HERC5   | KCNA1   |
| CTDSP1   | GSTM1  | MCOLN2  | DRD5    |

|          |         |         |          |
|----------|---------|---------|----------|
| HS3ST3A1 | CYP2J2  | RAB33B  | F2       |
| IL4I1    | CX3CR1  | IFITM3  | RPS6KA3  |
| ITEVIR   | SLC34A1 | CHPT1   | CDK5R1   |
| ITPA     | TWNK    | EVI2A   | NOS1     |
| LSM6     | ATP1B1  | TLR1    | NOS3     |
| MDH2     | FH      | SP3     | PRKCA    |
| ME2      | SMARCA4 | HEBP2   | ROCK1    |
| RNASE1   | GHRL    | IFIT1   | PRKACA   |
| TM0857   | TLL1    | TSC22D1 | QDPR     |
| TM1436   | TF      | BLVRB   | HDAC9    |
| UCK2     | POU4F1  | EPSTI1  | CDK4     |
| EBP      | PKD2    | PIK3AP1 | PLA2G2A  |
| FNTB     | CELA2A  | AGTPBP1 | HSP90AB1 |
| UBA2     | PDGFRA  | KCTD12  | TRAP1    |
| PSENEN   | ITIH4   | GNA13   | MAPT     |
| CCNA1    | CCL11   | ALAS2   | FGFR1    |
| CCNB1    | MT-ATP8 | XRCC2   | NOX4     |
| NCSTN    | BGLAP   | FKBP14  | INSR     |
| APH1A    | LTC4S   | RAD21   | SLC5A2   |
| APH1B    | MTR     |         | SLC5A1   |
|          | HYT1    |         | SLC5A4   |
|          | HNF1A   |         | ADK      |
|          | VHL     |         | GAPDH    |
|          | NEFL    |         | HSPA8    |
|          | MIR132  |         | IGFBP3   |
|          | MMP12   |         | HSPA5    |

|          |         |
|----------|---------|
| SCNN1A   | SLC29A1 |
| RGS5     | SELE    |
| HYT2     | SELP    |
| HYT3     | ENPEP   |
| HYT4     | P2RX3   |
| HYT5     | CASP6   |
| HYT6     | CASP7   |
| HYT7     | CASP8   |
| HYT8     | CASP1   |
| TBX5     | CASP2   |
| MIR145   | MMP16   |
| MIR9-1   | TYMP    |
| MYL4     | F10     |
| CD40     | ITGAV   |
| OTC      | PDPK1   |
| IL13     | HLA-A   |
| FAS      | OPRD1   |
| IL1R1    | GLS     |
| ACE2     | DNMT1   |
| ABCC8    | CTSD    |
| PPOX     | NPY1R   |
| ERCC6    | ADRA1B  |
| IL6R     | CCR6    |
| IAPP     | GABRQ   |
| SMARCAL1 | GRIN1   |
| LRP1     | GRIN2A  |

|         |        |
|---------|--------|
| MGP     | GRIN2B |
| SURF1   | GRIN2C |
| PCNT    | GRIN3B |
| IL4R    | NR1I2  |
| TFPI    | NR3C2  |
| DKK1    | ACADSB |
| CFH     | ACSL4  |
| OPN4    | ARF1   |
| NAMPT   | CALM1  |
| MIR126  | CYP2C8 |
| NDUFS4  | FADS1  |
| PDGFRB  | FADS2  |
| CYP4A11 | FKBP1A |
| C5      | FURIN  |
| GJA4    | GLTP   |
| SYNGAP1 | INS    |
| GARS1   | LTB4R  |
| TREM2   | LTB4R2 |
| LIMK1   | LTF    |
| SELPLG  | PAEP   |
| COL1A1  | RHO    |
| TGFBR3  | S100B  |
| ANGPT2  | SCN10A |
| CRELD1  | SCN11A |
| CHAT    | SCN1A  |
| CAV1    | SCN2A  |

|         |        |
|---------|--------|
| POMC    | SCN3A  |
| ABCC9   | SCN4A  |
| RYR1    | SCN8A  |
| GATA3   | SLC8A1 |
| KCNE2   | SREBF1 |
| COG2    | VLDLR  |
| H19     | ABO    |
| ACTG1   | ACTA1  |
| TARDBP  | CYP2B6 |
| TNFSF4  | GCK    |
| COX5B   | HBA1   |
| PTH     | HBB    |
| AHSG    | IFNB1  |
| SNCA    | SFTPD  |
| SLC2A1  | AKR1D1 |
| MFN2    | SDHA   |
| CLCN1   | SDHB   |
| DNAH8   | SUCNR1 |
| IRS1    | TMLHE  |
| ANGPTL6 | ANXA1  |
| MTERF1  | ATP1A2 |
| ITGB1   | ATP1A3 |
| PHACTR1 | HSD3B1 |
| CTNNB1  | LPL    |
| ASS1    | NFKB1  |
| EGF     | TNF    |

ARSA  
FGF21  
MIR210  
FLNC-AS1  
MC4R  
IFNG  
MYD88  
SLC1A3  
NOTCH2  
PCCA  
IRF5  
BMP2  
FN1  
XIAP  
EPRS1  
ARRDC4  
BMP6  
GDF2  
TPM1  
FMR1  
F13B  
TSPAN2  
WDR26  
YY1AP1  
ASTN2  
LOC110806262

YWHAE  
ANG  
BHMT  
CS  
GNMT  
HGS  
IDH1  
IDH2  
MIF  
RNASE3  
LCT  
MBL2  
ICAM1  
PRKAB1  
PIK3R1  
CDK5  
ITGB3  
ITGB2  
PRKAA2  
CCNA2  
PSEN1

B2M  
CORIN  
HTR3A  
SAMHD1  
PGF  
MGR5  
MGR6  
GH1  
KALRN  
NRP1  
ODC1  
SST  
NR2F2  
CLU  
ASIC1  
THSD1  
SETD2  
SPG7  
TFAM  
MIR143  
LIPA  
PARK7  
CPT2  
CD63  
CHI3L1  
TEK

CHIT1  
UQCRRS1  
IL5RA  
LEPR  
MT-ND3  
CRYAB  
FGF23  
MGR2  
MGR3  
MGR8  
MGR1  
MGR10  
MGR11  
MGR12  
ALG13  
NTS  
KLKB1  
MT-ND2  
NDUFA1  
PCCB  
TIMP3  
GYS1  
RNLS  
COX4I1  
PAPPA  
SCNN1B

MEFV  
BAD  
LOC106029312  
CDH5  
IL9  
PIGA  
NAGS  
ATXN2  
SCGB1A1  
ATFB5  
WDR45  
MIR451A  
APLNR  
MT-ND4L  
GPX3  
UCP3  
DMD  
MIR499A  
MTAP  
CMA1  
MIR149  
MIR30A  
KCNJ11  
NT5E  
HABP2  
MIR122

CELSR1  
CYP1A1  
JUN  
GGCX  
MIR223  
SGK1  
NTN1  
MIR144  
XRCC1  
MROS  
ERCC8  
HGF  
PRKN  
IMPA2  
KITLG  
SLC17A5  
CCN2  
IGFBP1  
LIF  
APOL1  
GCH1  
IRAK1  
MASP2  
PON3  
ITLN1  
WRN

TAC1  
KARS1  
SLC2A4  
C4B  
RAI1  
GC  
MEG3  
CCR3  
FOXP2  
MIR196A2  
IL37  
MIR181A1  
S100A1  
WNK1  
ACP5  
CCL5  
PPARGC1A  
HSPB1  
IL3  
KCNK17  
MAPK8  
PTK2B  
NUP155  
TRPV4  
GGT1  
PVALB

CLCN6  
LOC106627981  
WARS2  
TFB1M  
DNAH5  
CCDC88C  
DDAH1  
GHR  
SLCO1C1  
TWIST1  
SOST  
NR4A2  
NEFH  
CD68  
H2AC18  
KIF6  
C4A  
SLC19A1  
ADAMTS7  
MIRLET7B  
MIR199A1  
STX1A  
AIFM1  
MIR29A  
KCNB1  
HAVCR1

JPH3  
SPTB  
NOTCH4  
SOCS1  
PIGQ  
MS4A2  
GPX1  
SUOX  
MMP10  
VIPR2  
BDKRB2  
IL33  
DLL4  
CACNA1C  
CDH13  
ADAMTSL1  
APOA4  
TIE1  
LEPQTL1  
FNDC5  
BRAP  
CFLAR  
ADCYAP1  
ABCG2  
DLL1  
RBPJ

TCF7  
GNAS  
CAMK2G  
DLG4  
PTGDS  
RYR2  
CIITA  
MTTP  
GSTT1  
PSMA6  
CDH11  
AFG3L2  
ABCG8  
EGR1  
P2RY1  
SLCO1B1  
TNFSF11  
PTHLH  
PMM1  
CHGA  
MIR134  
PDGFB  
SQSTM1  
BAX  
TRIM2  
CCK

SOD3  
SELENOS  
ABCG1  
LTB  
TRPM7  
IFNA1  
DLL3  
SRRT  
STAT5A  
STIN2-VNTR  
RUNX2  
CX3CL1  
IL12A  
IL2RA  
UGT1A1  
ADH1C  
HEY1  
JAG2  
HEYL  
EPHB4  
IFIH1  
MIR34A  
MTRR  
CELF2  
NAGLU  
MUC1

CACNA1A  
PATJ  
MYT1L  
MIR140  
DENND11  
SAA1  
MIR221  
CDH4  
MMRN1  
MIR124-1  
GAS6  
HNF1B  
TNXB  
APEX1  
NDUFC2  
COL1A2  
ZC3HC1  
BECN1  
BMPR1A  
RUVBL2  
LLGL2  
APLN  
MIR125B1  
ERCC4  
MYC  
PSAP

CALCRL  
SP1  
MIR125A  
ALKBH8  
CD28  
CD177  
IGF2  
ASIC3  
KCNN4  
GSTO1  
CALB1  
MIR142  
C19orf12  
ABCB7  
HRAS  
HTT  
CTSB  
CYP24A1  
DEFA1  
ROS1  
MEF2D  
SIL1  
KCNMB1  
CD4  
DNAH11  
DDC

EZH2  
NTRK2  
H2AX  
STAT5B  
PALLD  
VAMP8  
SCNN1G  
APOD  
MYH15  
SNX19  
ICAM4  
LMX1B  
IL1F10  
CSF1  
COL6A3  
IRF1  
HAMP  
GSTO2  
NTRK1  
STAT4  
SERPINA12  
NQO1  
MIR24-1  
HSPD1  
AKT2  
GATA5

ERAP1  
HSPA1B  
OPA1  
TLR3  
MVK  
LRP5  
NPR1  
CCL17  
EPAS1  
AUTS2  
GRK2  
KLC1  
MIR188  
SLC25A4  
ATP2B3  
GSN  
ST2  
KCNQ2  
RAC1  
CLEC16A  
KCNK4  
MIR150  
LAMA1  
NRG1  
CSTB  
ALDH1A2

CRH  
VIP  
MIR30E  
SUPT3H  
IDE  
UMOD  
PSRC1  
LEMD3  
PLAUR  
AQP1  
KLK1  
IL11  
FABP12  
PRTN3  
HRES1  
TTC7B  
AP3B1  
TRAF3  
MIR17  
RUNX1  
GHRH  
HLA-DRA  
DSP  
ADAMTS1  
ARHGEF10  
NGFR

ADCYAP1R1  
KCNQ3  
TNFSF12  
ZCCHC14  
PDGFD  
DCN  
BLK  
ITGB6  
SERPINA9  
MLYCD  
ITGA4  
HPS1  
MAPK10  
UBR3  
FOXF2  
USF1  
APIP  
STK11  
FASLG  
MAPK8IP1  
HOTAIR  
HHT3  
KCNIP4  
LBP  
ANGPTL4  
CXCR2

FUNDC2  
SLC9A3R2  
SMPD1  
TCF21  
HSPG2  
CAMTA1  
TRAPPC9  
EPHA3  
GCLC  
NOD2  
ANGPTL3  
RARRES2  
BCAN  
MGAT5  
SPATA13  
RHOA  
DAPK1  
PCDH19  
TRH  
UCHL1  
ZNF292  
CSF3R  
APOA2  
PFKM  
MKI67  
CD59

S100A9  
MMAA  
ALDH7A1  
SPSB4  
GAL  
SLC22A3  
MAG  
STN1  
CELSR2  
TBX3  
ITM2B  
CRYBG1  
OXT  
VEGFC  
PDGFA  
FLG  
CACNA1B  
KCNK3  
CHRNA4  
LOC110673971  
ADAMTS2  
APCS  
FOXG1  
TSC2  
WNT3  
CARD8

LCAT  
PKP2  
TLR7  
MIR195  
GSTP1  
VIM  
SCGN  
NFAT5  
CARD14  
MON1B  
BMPR2  
ATG7  
ROPN1  
EDN3  
NAA25  
SNHG14  
ZPR1  
STRN  
MIRLET71  
CAPN10  
S100A8  
HSPA1L  
COL4A4  
CSN3  
DFFA  
GRIA3

CYP2E1  
SRSF3  
ANK2  
IL16  
ASPM  
SYNPO  
ZC3H12A  
COL5A1  
CLCN2  
NCAM1  
CHUK  
ALDH1L1  
GUSB  
WDR12  
KMT2A  
GLUD2  
MOCS2  
NUDC  
SYP  
SOCS3  
MTHFS  
SUN1  
OXA1L  
IGFBP2  
PLA2G6  
LPAL2

SPTBN5  
OPTN  
CST9L  
CST8  
IL5  
PRRT2  
MIR33A  
AMBP  
MIR125B2  
LPXN  
VDAC1  
TAGLN  
CXCL1  
CDC5L  
TNIP1  
CNNM2  
ETS1  
MMAB  
ADCY10  
CACNB2  
IL1RL1  
PNPO  
ROCK2  
TUBB3  
TIMD4  
IBSP

HCRT  
SPTAN1  
LDB3  
CREBBP  
LINC01394  
TTF2  
OSM  
PAWR  
MIR206  
GZMB  
GFER  
MIR29C  
PEAR1  
TERC  
C3AR1  
AMPD3  
FXN  
MIR130A  
ACYP2  
NRIP2  
UFSP2  
TNFAIP3  
FST  
TNFRSF11A  
FCN1  
NKX2-1

BIRC5  
NEAT1  
ITGAE  
HSPB2  
WNK3  
XKR6  
P2RX7  
UGCG  
SMARCA2  
ABCD2  
PEMT  
CTSK  
POMT2  
COL5A2  
CR2  
MIR130B  
NFATC1  
MTHFD1  
PAFAH1B1  
LOC102724058  
TJP1  
RASD1  
PLPP3  
NPPC  
TOX  
FAM205A

FHIP1A  
ADNP  
ADAMTS18  
FCGR2B  
GDAP1  
FCAR  
SLC39A7  
AQP10  
TAS2R50  
CKB  
CKM  
EPHA4  
IL20  
KRT5  
DCC  
ALOX12B  
MLF1  
SERPINB8  
P2RX6  
SLC26A8  
TAF3  
VTI1A  
MCM10  
KRT74  
PGLYRP2  
DMXL2

FCRLB  
FSTL4  
SGIP1  
HEATR5B  
TMPRSS11B  
WDR31  
MYOM3  
ZNF132  
OR13G1  
OR2A25  
WDR55  
LGALS14  
LY6G5B  
RPLP0P4  
ITGA3  
NPTX1  
DEFB4A  
SOX9  
LBR  
TCN2  
IVD  
ZFP30  
GAS5-AS1  
ICOSLG  
PANK2  
PRDM16

OGG1  
SLC2A6  
CXCL10  
NF2  
UCP1  
HSPB8  
GJB1  
SCARB1  
RAMP2  
MEF2C  
GCLM  
RASIP1  
TNC  
GALC  
RPS6KA2  
PPIG  
P2RX4  
TSHR  
M6PR  
APOC1  
HPX  
SLPI  
TFRC  
COX5A  
ITPR1  
MIR124-3

GAP43  
PRKAA1  
GATA1  
SLC12A1  
ARG2  
PENK  
PNOC  
PHF6  
CGAS  
SOAT1  
MYOCD  
LAMA3  
P4HB  
CDKN3  
ADIPOR2  
NPHS2  
IL36RN  
KRT14  
MYL3  
MED13L  
MIR602  
SAA4  
PMS2  
HYOU1  
ARL6IP6  
KIF5A

DAXX  
GOSR2  
GUCY1B1  
IFNA2  
VSTM4  
RASA1  
PDP1  
ARID1B  
HLA-DQA1  
HADHA  
CYP11A1  
PRDX1  
VTN  
DCTN1  
BCL2L11  
DNASE1  
SNAP25  
SLC4A4  
SLC17A3  
APOM  
TTLL5  
ERRFI1  
SHISA6  
TMEM163  
ZDHHC22  
OBI1

LINC02113  
MRAS  
FOXO1  
DIAPH1  
DDAH2  
NFIA  
PINK1  
U2AF1  
CHEK2  
SFTPA1  
CD86  
GOLGB1  
HAVCR2  
FOSB  
KRT20  
DNMT3A  
MIR27A  
IL21  
ATP10A  
APOC2  
CFHR5  
MIR382  
RELA  
MIR100  
TNFRSF9  
MIR185

MIR15A  
SLC1A7  
CCL7  
SMN1  
RB1  
MSX2  
MIR495  
TAF1  
CAV3  
C11orf65  
CFI  
SLC12A2  
PARP12  
GPATCH8  
TMCO6  
RAMP1  
BLOC1S1  
GAD2  
NLGN1  
CRYAA  
CARTPT  
LAMP1  
BRCA1  
TRPC6  
NTNG1  
SLC20A2

SOCS2  
TRPC3  
MIR16-1  
GP5  
AFF2  
GAST  
TCF4  
NDUFA6  
MIR200B  
ITGA5  
IL23R  
NEDD4  
TNR  
DFFB  
GLUL  
RBFOX1  
RMST  
HPR  
UCN  
CAMK2A  
MIR326  
TPO  
NLRP1  
PGM1  
PCNA  
HBG2

PLIN1  
ULK4  
UTS2  
CYP1A2  
DPAGT1  
MIR29B1  
CUBN  
FUT2  
NBPF3  
HMGCL  
CARF  
SEMA3F  
BMP4  
GP9  
ENPP3  
PTCH1  
PRKAR1A  
TRADD  
WARS1  
ATP2B1  
CYSLTR2  
KRT18  
LOC110973015  
ASXL1  
NFE2  
CRLF3

DIO3  
TNFSF14  
PRRC2A  
STUB1  
CANT1  
LTBP2  
WNK4  
NNMT  
CDC42  
IL21R  
HJV  
MIR27B  
MARS1  
ADIPOR1  
FES  
PDE4DIP  
ACOT4  
TRIM29  
TPPP3  
PROM1  
BTD  
GAD1  
CASR  
YWHAQ  
CHD3  
NEUROG3

DPH1  
KLF5  
SLC22A7  
EIF1AY  
IL18R1  
SEMA4A  
KLRC4  
UBAC2  
IL12A-AS1  
CTH  
TRIM9  
AP4M1  
ENO1  
BDKRB1  
AGXT2  
TGFA  
NTN4  
RAPGEF3  
MIR214  
CLDN5  
AHSP  
HOMER1  
HOMER2  
LMNB2  
SLC4A1  
MIR599

ACSS1  
TRAF6  
FGF14  
MCF2L  
ENOX1  
CFHR4  
ZBTB41  
LINC02145  
DNAJC6  
CPLX2  
WDR37  
THY1  
TRAPPC11  
PCSK2  
SIRT6  
CAPN1  
MSTN  
CMC4  
SLC6A8  
AARS1  
PPP1R1B  
USP36  
MIR30D  
NSF  
MIR200C  
PLTP

MIR212  
F2RL2  
NOX1  
HRH3  
MX1  
RTN4R  
SLC9A3  
FADD  
RNF146  
STT3B  
IL1RAPL2  
COX14  
PLA2G3  
CALCR  
MIR199A2  
SORCS2  
CXCL2  
SIRT2  
MIR4437  
GRK3  
SNRNP70  
CCL18  
PDE4A  
SRGAP3  
DPP10  
RUFY1

CAPN2  
PSMB9  
MYBPC1  
SLC2A9  
DPYSL2  
PDYN  
PMF1  
PMF1-BGLAP  
PDGFC  
DKK3  
SERPINA5  
SYNE1  
PSPH  
VSNL1  
ATP13A2  
SLC25A37  
MAPKAPK5  
HECTD4  
PHETA1  
TMEM116  
ADAM1A  
PCNPP1  
lnc-FAM109A-1  
HSALNG0094037  
RF00017-1164  
HSALNG0094038

piR-48007  
piR-51327  
piR-36455  
piR-38259  
piR-50346  
piR-51449  
piR-56480-015  
SLC13A5  
TFAP2A  
ARNT  
FMO3  
DNM1  
DUSP2  
CAV2  
TAB2  
DDIT4  
TSPYL6  
MIR503  
HBA2  
ATP4A  
MACROD2  
ATP6AP2  
CCN1  
CTBP1  
PTPRN2  
TP73

NCOR2  
EIF2AK1  
LZTR1  
AKAP12  
SBF1  
ACOT7  
TAF4  
PACS2  
ARVCF  
BAK1  
FGFR4  
CDKN1A  
KIF16B  
CACNA1D  
OBSCN  
COMP  
NPHS1  
PLCB2  
SAG  
TLK1  
ZNF208  
DEC1  
MIR4271  
CXCR5  
MERTK  
PSMB7

CD74  
AFP  
PTCSC3  
SDC1  
P2RX2  
ZNF318  
OSMR  
DMRTA1  
MED22  
SURF6  
CR1  
EFEMP2  
MIR208A  
DNM1L  
BLM  
HAAO  
CGA  
FAF1  
RILP  
ELMOD1  
TSPEAR  
ATPCKMT  
LOC100507346  
MIR133B  
SCT  
HSP90B1

FBLN5  
ENDOG  
C1orf167  
MANF  
EMD  
NOD1  
MIR1275  
MIR422A  
CYP2R1  
SORD  
DVL1  
ILF3  
HSF1  
SERPINA7  
CBL  
PRKCZ  
LRPAP1  
C1QA  
ANK3  
HRH2  
PTPRD  
HTR3B  
PICALM  
VPS11  
MOBP  
MIR616

PSMD9  
KCNJ1  
CST2  
SIRT3  
DYNC2H1  
SUN2  
MAP2K4  
IL20RB  
ALCAM  
ATF6  
NPC2  
HADH  
LACTB  
TYK2  
SPARCL1  
TIPARP  
PRPF8  
TMEM132D  
TCF12  
SLC44A2  
MIR340  
PHF1  
SCUBE1  
RPL7A  
SH3PXD2A  
SURF4

CASZ1  
PMFBP1  
SURF2  
TTBK1  
C1orf127  
C16orf95  
SNORD24  
SNORD36A  
SNORD36B  
SNORD36C  
F11-AS1  
LOC100505841  
LINC01304  
LINC01438  
RPL21P81  
ENSG00000201451  
RNU6-144P  
ENSG00000277653  
lnc-TWIST1-1  
ZYXP1  
HSALNG00000800  
lnc-JPH3-1  
lnc-JPH3-6  
HSALNG0070392-001  
RF00017-7527  
RF00951-004

MN297386  
HSALNG0050175  
piR-58308-245  
piR-41525-616  
piR-59149  
piR-31534-613  
MAP1B  
HVCN1  
SYNE2  
CRAT  
GATM  
ANKS1A  
DEFB1  
RNASE2  
CILP2  
IL10RA  
HSPB6  
CHRNA3  
MIR22  
MYL2  
KCNJ16  
XYLB  
MATN3  
MIR24-2  
CBX5  
LTBP4

PRPS1  
TP53BP1  
NAGA  
MIR124-2  
FUT8  
SLC37A4  
VPS33B  
GALNT17  
DENND2B  
REST  
EDN2  
SMG6  
DNM1P37  
RPTOR  
TRAPPC4  
RAB8A  
SBF2  
FBXO38  
TECRL  
SSPN  
CXCL11  
PANX1  
NPR2  
TRA2B  
ADGRL3  
TRPM2

CSRP3  
MIR191  
GLDC  
SGCA  
HMBS  
THUMPD3-AS1  
ACVR1  
WT1  
TFEB  
TOMM40  
ACADVL  
IRAG1  
BCR  
LRP6  
MIR199B  
PXDN  
NDRG1  
MOCS1  
MIR375  
CALHM1  
LGALS1  
HPS4  
NEURL1  
CPNE8  
COL28A1  
OBP2B

CCNH  
FOXP3  
IL12B  
HMOX2  
CAST  
CPOX  
IL15  
ALDH1L1-AS2  
SLIT2  
HLA-DRB4  
MS4A1  
XPA  
AGA  
A4GALT  
CHKA  
SHOC2  
STK24  
MTFMT  
RAB39B  
MIR148B  
MIR29B2  
MIR151B  
RTEL1  
ZEB1  
MCCC2  
TOLLIP

SLC7A8  
CCT2  
AP3D1  
FAM13A  
ZNF618  
MIR320A  
DIO1  
MIR483  
IL10RB  
CHRNA4  
MIR93  
TNFAIP8L2  
MAP3K11  
MYLK-AS1  
LINC01389  
MIR192  
ROR2  
DOCK1  
POLR1D  
PSMB4  
PML  
CDH15  
PSMA4  
TFF1  
COLEC11  
FOXF1

MAPKAP1  
UBE2R2  
NADSYN1  
COL13A1  
PPP1R12B  
PIGG  
PITRM1  
MCC  
NUP210  
TBCD  
UHRF1  
USP20  
RGS12  
WNK2  
GAS7  
NVL  
SIX5  
DIDO1  
ITM2C  
ZNF79  
PANX2  
OGDHL  
SS18L1  
TCF25  
USP37  
SPTBN4

COL23A1  
CUL9  
CDYL2  
ADAMTSL5  
OSGIN1  
SDK1  
ZNF607  
MYO7B  
MEGF11  
RABGAP1L  
CCDC86  
PNLDC1  
DIP2C  
TMEM39A  
RAB6C  
ZC3H3  
ZSWIM2  
TRPC1  
SMAD9  
ZIC3  
KCNN3  
TKT  
HNRNPK  
SGPL1  
SOX5  
SKI

PEX1  
ARID1A  
NDUFS6  
FXR1  
PIGV  
PEX10  
SEMA3C  
CARS2  
DNAJC19  
NRCAM  
DNAJB11  
CNTN6  
TTC8  
SORBS2  
CADPS2  
HNRNPA3  
DEFA3  
CRTAC1  
EPG5  
KCTD13  
RER1  
SBF2-AS1  
MIR4497  
MIR181B1  
MIR181B2  
NUDT6

ABCC3  
PCDHGA3  
MIR17HG  
MIR335  
KIF26B  
CTC1  
LGALS13  
MOG  
PSMC3  
SLC8A3  
NEDD4L  
LGMN  
KLF2  
HCRTR2  
JUNB  
MIR30B  
CDK6  
FANCC  
CDKN2C  
LATS2  
LRAT  
DAB1  
WNT2B  
DGKG  
RXFP2  
RAD18

TSHB  
PTPRG  
COX7A2L  
CRYGS  
SC5D  
EML4  
GATAD1  
KCNG3  
TECTA  
A1CF  
DDX31  
CGNL1  
PPFIBP2  
TSPAN15  
ZNF354A  
CNTNAP4  
NAALADL2  
TMEM14C  
SYT9  
LRCH1  
DMRTA2  
LHFPL3  
PHACTR2  
THUMPD3  
CACFD1  
SLC35F6

SRRM4  
ZNF354B  
ASPHD2  
OLFML1  
CIB4  
LTV1  
FAM133B  
ADTRP  
MRPL57  
ZNF354C  
ZC2HC1B  
MEDAG  
FAM170B  
TMEM170B  
ZNF879  
TEX26  
C1orf185  
TMEM273  
TRA  
LINC00545  
TEX26-AS1  
LINC00462  
FAM170B-AS1  
LINC00398  
AACSP1  
CRYBB2P1

LINC01435  
CDK6-AS1  
MIR548AD  
MIPEPP3  
MIR297  
MIR3156-3  
PHACTR2-AS1  
LINC02052  
LINC01657  
TBCEL-TECTA  
SRGAP3-AS1  
THRAP3P1  
LINC01765  
RPS3AP5  
UBE2L2  
RPS12P23  
ENSG00000197099  
RNU6-667P  
STARP1  
RN7SL363P  
ENSG00000250999  
ENSG00000225378  
ENSG00000266993  
ESRRAP2  
GTF2IP2  
LGMNP1

PPIAP22  
LOC105372028  
ENSG00000271897  
BOLA3P1  
GAPDHP50  
ICE2P2  
RNU7-159P  
RCN1P1  
HSALNG0070397  
ENSG00000287593  
lnc-ALDH1A2-9  
MIR378G-002  
ENSG00000257065  
ATP5MC1P8  
NDUFB10P1  
HSALNG0006261  
HSALNG0113824  
lnc-ABO-33  
lnc-ZFP2-1  
lnc-FAM170B-1  
lnc-FURIN-3  
lnc-MTAP-3  
HSALNG0089738  
HSALNG0096147  
lnc-CDKN2C-1  
lnc-FAM133B-2

lnc-TMEM170B-5  
RF00017-1273  
NONHSAG020469.2  
RF00017-4863  
MTND4P33  
MIX23P2  
HSALNG0013736  
HSALNG0003544  
HSALNG0106222  
HSALNG0108163  
HSALNG0108164-001  
lnc-COX7A2L-1  
lnc-AQP9-4  
HSALNG0048081  
HSALNG0048080-001  
HSALNG0108164-002  
piR-44878-030  
lnc-EML4-10  
lnc-FANCC-4  
piR-45932-090  
piR-59515-001  
piR-59907-030  
HSALNG0077864-002  
lnc-CTTNBP2NL-4  
RF00017-5985  
RF01016-016

TARDBPP5  
HSALNG0024006  
HSALNG0123985  
HSALNG0113827  
piR-40216-002  
piR-51980  
lnc-KRTAP12-4-1  
piR-39341-075  
piR-49334  
piR-58579  
piR-31534-476  
HSALNG0003920  
HSALNG0003921  
HSALNG0003922  
HSALNG0123953  
piR-45012-007  
DDIT3  
TNKS  
KLF15  
RFC1  
ERCC1  
LPAR3  
RAN  
ICMT  
TWIST2  
UBA7

NUP153  
NAT10  
CLMP  
RCE1  
SYNE3  
SLC5A6  
CD200  
CAVIN2  
MIR423  
PPP1R12A  
NOL3  
BNIP3  
ELAVL1  
MADD  
IGFBP4  
DOCK7  
IL17RC  
BCO2  
MIR4669  
SLC24A3  
OPCML  
FABP7  
INF2  
AQP2  
STK39  
ARNTL

MIR222  
CRABP1  
TRIM31  
UBE2W  
ZXDC  
C6orf58  
ANKRD13D  
FGFBP2  
KHDC1  
CCER2  
CEP295NL  
DEFB133  
LINC00316  
MIR124-2HG  
MIR3679  
LINC00351  
MIR6165  
MFN1  
SLK  
CACNA1S  
TBX1  
PCDH7  
NT5C1B  
SVIL  
CCL4  
PEX16

PAGR1  
ATL1  
PAH  
TRIM21  
CCL26  
IRF2BP2  
MMADHC  
MIR26B  
TBL3  
GPR135  
SLC12A3  
ATP1A4  
DDR2  
FLRT2  
RP1  
AGBL1  
HLA-DPB1  
RELB  
G6PC1  
KCNK2  
RIPK3  
TOP1  
ARSB  
ADD3  
CSPG4  
RECK

CSTA  
CST6  
CST5  
CST7  
CST4  
CRLS1  
FIP1L1  
TSPAN16  
EIF4A2  
RCAN1  
INPP5D  
PDIA2  
MAPK13  
TPM4  
SLC35F3  
FLVCR1  
SLC25A38  
NR4A1  
RO60  
MED23  
GNAI1  
NOX5  
TRPM8  
MIR23B  
BCKDHB  
CACNA1H

GRK4  
ADD2  
CD44  
MAP1LC3A  
HOXD13  
ARTN  
SLC25A14  
TXNIP  
SEPTIN9  
LARGE2  
CCL20  
MIR216A  
ADAM12  
SFN  
COL14A1  
ADAMTS3  
AIM2  
ARNT2  
KCNK1  
SLC14A2  
NDUFV3  
IRX1  
TMX1  
STARD3NL  
PF4V1  
CCDC39

CHORDC1  
AJAP1  
RPL7P45  
PYY  
CAMKK2  
HLCS  
SMTN  
RHOD  
PPP1CA  
TPH1  
DUOX2  
RENBP  
BSG  
GNRH1  
NAIP  
TRPC5  
EGFL7  
ANKH  
QRSL1  
MAF  
CLCNKB  
PRSS8  
KLK4  
GAS5  
MIR590  
MIR296

MIR92B  
MIR20A  
KEAP1  
CANX  
FLOT1  
ISL1  
PEA15  
PDE3B  
IKBKG  
ATF2  
SERPINF1  
PLA2G10  
ADM2  
PRDX5  
SCG2  
TLR6  
STIP1  
CALB2  
RPS6KA1  
BCKDK  
TFAP2B  
HIBCH  
HTRA2  
UTS2R  
LIPN  
MIR520A

CBSL  
GCDH  
CACNB4  
CYP27B1  
EPHX1  
FAIM2  
HADHB  
STC1  
PLOC2  
MCEE  
SLC2A13  
OXTR  
SLC7A7  
ANK1  
IDUA  
SIK2  
DUSP19  
KAT2B  
PLCB4  
DDX6  
FZD1  
PIK3C2G  
RHAG  
DHX38  
SLC36A2  
STK38

SLC14A1  
TNFRSF21  
ATP6V1G3  
EIF4A3  
GDA  
PDE9A  
SFRP4  
PTPRT  
UAP1  
AKAP8  
CYTH1  
ARCN1  
EED  
PSMB3  
KCNS3  
RFC4  
RNF8  
WNT9B  
CRISP2  
GDI2  
POP1  
MKRN1  
NCAM2  
USP28  
RPH3A  
SWAP70

AMBN  
CXCL6  
FRMD6  
NPLOC4  
PLCH2  
ZNF143  
DEFA5  
FCRL5  
ENAM  
HOXD8  
HMGN2  
FOXP4  
NLRP5  
MYRIP  
OSBPL1A  
NAPB  
RPS25  
SLC26A11  
WDR4  
TMOD4  
USP46  
ANO2  
CCL1  
ARHGAP21  
CTR9  
IRX2

NTPCR  
SDR16C5  
SLC37A3  
PRCC  
ADAMTSL3  
BRPF3  
ETV7  
COPS8  
FGD6  
ZNF77  
PGLYRP3  
PI16  
MPHOSPH6  
PHLDB1  
UPK2  
ONECUT2  
SPINK7  
TMEM132E  
VAT1L  
ETV3  
FOXR1  
HOXD1  
HINFP  
PDZRN4  
NRIP3  
USP38

RNF26  
CCDC59  
DTWD1  
CMTR1  
BCL9L  
CEP131  
ZNHIT6  
NIPAL2  
TBCCD1  
SIGLEC15  
WIZ  
RASAL3  
ZNF333  
AGMO  
C6orf89  
C2CD2L  
GPATCH3  
ZNF516  
PDCD11  
SPATA18  
NYNRIN  
TMEM51  
TMEM74  
PRDM15  
RNF17  
THNSL1

ZNF431  
ZFAND2A  
ADGRF1  
CST9  
INO80E  
R3HCC1L  
QRICH2  
RAB19  
ASPHD1  
C7orf50  
CCDC153  
CCDC83  
DPPA3  
GPN2  
KAZN  
MORN1  
LYZL6  
TMEM243  
TRNP1  
DYNC2I1  
CSTL1  
ENDOV  
RERGL  
VWDE  
ZNF626  
DEFA1B

ARMC12  
FAAP100  
LRRC37A2  
XKR9  
MARCHF1  
SYCE1L  
RAB44  
SPINK9  
ANP32C  
CLDN25  
RPRML  
CEP20  
ELAPOR2  
FAAP20  
ZNF737  
C8orf86  
TRIQK  
CENATAC  
METTL25B  
LEXM  
TEPSIN  
TP53TG1  
NPIPA5  
CMAHP  
CYP1B1-AS1  
TBC1D29P

TMEM132E-DT  
MIR873  
MAPKAPK5-AS1  
HAGLR  
SNORA81  
SNORA4  
COX7A2P2  
DISC1FP1  
LINC00923  
LINC01013  
MIR1248  
PKD1P1  
OR4E1  
SNORA63  
TMEM9B-AS1  
C10orf143  
LINC02906  
LINC00924  
EEF1A1P5  
MIR4492  
NALCN-AS1  
LINC00640  
SNORD2  
LOC100131635  
B4GALT4-AS1  
CST9LP1

MIR4427  
LINC01750  
MCPH1-AS1  
SDR16C6P  
SUZ12P1  
FAM95C  
LOC100129534  
MOCS2-DT  
MIR4277  
PRKCZ-AS1  
OR7E154P  
SNORA63B  
DEPDC1-AS1  
CENATAC-DT  
LINC02709  
MIR1470  
RPL17P9  
ZFAND2A-DT  
DEFT1P2  
ACTG1P20  
CELF2-DT  
DEFA11P  
DINOL  
FBXO38-DT  
LINC02267  
LINC02426

ZCCHC14-DT  
LOC101928882  
LOC101928855  
ENSG00000262633  
ATF4P4  
CRPP1  
FOXF2-DT  
LINC02400  
NPM1P39  
LINC02511  
RPS7P3  
RPS20P14  
RPL7AP10  
ENSG00000261707  
ENSG00000233754  
ENSG00000222022  
ENSG00000224079  
ENSG00000226698  
ENSG00000254554  
ENSG00000243107  
ENSG00000258942  
MIR8084  
RPL21P97  
RNU1-88P  
RNU6-380P  
RNU6-440P

RN7SL688P  
ENSG00000260461  
ENSG00000262049  
ENSG00000263826  
ENSG00000254397  
ENSG00000183889  
ENSG00000238387  
ENSG00000253821  
ENSG00000227698  
ENSG00000231724  
EEF1A1P36  
LINC01148  
LINC01643  
LCN1P2  
MTND1P24  
NRBF2P1  
LINC02151  
LINC02309  
LINC02686  
TPT1P9  
VN2R10P  
RNA5SP107  
RNU7-165P  
RPL21P41  
RPS20P25  
RNA5SP173

ENSG00000288545  
ENSG00000270001  
ENSG00000260202  
ENSG00000261063  
ENSG00000202169  
ENSG00000231421  
ENSG00000235450  
ENSG00000251330  
ENSG00000237719  
ENSG00000222529  
ENSG00000249678  
ENSG00000262879  
ENSG00000262979  
ENSG00000261285  
HNRNPA1P67  
RNU4-64P  
RNU4ATAC9P  
RNU6-102P  
RNU6-560P  
RNU6-694P  
RN7SKP242  
RNA5SP63  
RNA5SP360  
SNORA120  
ZBED1P1  
LOC101928255

LOC107985021  
LOC107985022  
ENSG00000273218  
lnc-RAB17-7  
lnc-SBF2-3  
lnc-RPS25-6  
lnc-EED-4  
lnc-VIPR2-1  
ENSG00000231344  
ENSG00000235023  
MG828730-002  
ENSG00000245869  
ENSG00000269110  
lnc-CXCR5-2  
NFU1P1  
MTCYBP43  
TRMT112P7  
RNU7-92P  
ENSG00000284946  
ENSG00000287999  
ENSG00000269779  
HSALNG0080729-001  
lnc-CCKAR-20  
lnc-MOCS2-5  
lnc-OR7C2-1  
lnc-POP1-1

lnc-RAB44-3  
lnc-RSPH1-4  
lnc-SLC2A6-3  
ENSG00000242068  
lnc-SWAP70-4  
lnc-TRIM49D1-2  
MN298114-198  
HSALNG0082631  
HSALNG0087588  
HSALNG0099362  
lnc-CHORDC1-1  
lnc-PIGV-3  
lnc-USP28-3  
HSALNG0087589  
HSALNG0031388-001  
HSALNG0031388-002  
HSALNG0049754  
HSALNG0087578  
HSALNG0099364  
HSALNG0099363  
lnc-C7orf50-1  
piR-44098  
piR-57460-243  
lnc-FST-6  
lnc-TMEM105-1  
lnc-ZNF66-3

RF00017-107  
RF00017-2376  
OA985837  
lnc-CXCL6-3  
NONHSAG036923.2-0  
01  
NONHSAG036923.2-0  
02  
RF00017-5070  
RF00017-5072  
RF00017-5074  
RF00017-6239  
RF00017-6240  
SGO1P2  
LOC107984869  
HSALNG0011563  
HSALNG0076746-001  
HSALNG0076749  
FJ601684-376  
AB372791  
lnc-TEFM-7  
MK280144-551  
HSALNG0121262-003  
lnc-FBXO38-1  
HSALNG0112598  
HSALNG0116963

HSALNG0119185  
HSALNG0035165  
HSALNG0039707-001  
HSALNG0039707-002  
HSALNG0055618  
HSALNG0062832  
LOC642355  
piR-43222  
piR-48209-548  
HSALNG0088814  
HSALNG0119064  
HSALNG0130581  
piR-43106-098  
piR-57337-010  
lnc-FBXO38-2  
piR-50444-432  
piR-34154  
lnc-DDR2-3  
piR-31432-181  
RF00026-195  
RF00017-5823  
RF00066-041  
LOC105378490  
LOC105375660  
HSALNG0025301-001  
HSALNG0059488

HSALNG0074045-002  
HSALNG0076128  
HSALNG0059492  
HSALNG0007119  
HSALNG0080735  
HSALNG0101240  
HSALNG0124379  
lnc-CST8-1  
lnc-PLCB2-1-001  
lnc-SIGLEC15-1  
lnc-SLC1A1-7  
lnc-SGCB-1  
lnc-SPATA18-4  
lnc-TERF2IP-6  
MK280144-221  
HSALNG0090516  
HSALNG0110658  
lnc-ADAMTS18-12  
lnc-MKRN1-1  
lnc-PRC1-3  
HSALNG0119063  
HSALNG0124827  
HSALNG0133334  
HSALNG0034390  
HSALNG0039132  
HSALNG0071141

HSALNG0059497  
HSALNG0063178-002  
HSALNG0063178-003  
HSALNG0075010  
piR-35581  
HSALNG0107907  
HSALNG0108471  
HSALNG0113053  
HSALNG0115879  
HSALNG0115880  
HSALNG0121281  
piR-55361-415  
lnc-SEZ6L2-1  
lnc-TTC14-3  
piR-36756-006  
piR-38562-016  
piR-55985-066  
piR-58712  
NONHSAG020037.2  
piR-32214-308  
MN309174-501  
piR-33101-001  
lnc-DEFA1B-1-002  
RF00026-1082  
RF00998-050  
LOC105375855

LOC105370935  
LOC107986462  
LOC105374240  
HSALNG0061800  
HSALNG0074045-001  
HSALNG0020602  
ENSG00000103200  
piR-39341-170  
piR-61240-147  
piR-46381-051  
piR-37081-005  
piR-56120  
piR-30188-105  
piR-33945  
FOXO3  
PLCG1  
SEMA7A  
B3GAT1  
TRPS1  
PDE6B  
TFG  
INA  
LOC110596866  
LOC110599585  
MAPK11  
CALU

SLC4A5  
DUOX1  
AGTRAP  
ATG9B  
CYP4A22  
HTN3  
SLC9B2  
HTN1  
EMX2OS  
MIR505  
MIR517A  
LINC01227  
LOC105371049  
ITGA1  
PLCL2  
TIMP4  
EYA1  
STMN2  
INO80  
LOXL1  
DLK1  
TNKS2  
REL  
LRRC8A  
SLC11A2  
MUC16

ABCD1  
SPHK2  
PTH1R  
FGF4  
SPARC  
MAPK7  
ATP7A  
ACTN4  
CSN1S1  
MIR374A  
TNFRSF25  
HTR7  
E2F1  
CXCL14  
LGI1  
TCFL5  
MIR215  
TRPM6  
ICAM3  
MIR211  
SOS1  
ECHS1  
PC  
GALNT3  
FAM20C  
PHEX

SLC34A3  
BMP10  
MYBPC2  
PHOSPHO1  
SLC2A11  
MLN  
DUSP11  
ARSJ  
OR2AG1  
DMBX1  
CNOT11  
CFAP47  
PVT1  
SLC12A5  
PLN  
NCEH1  
CPQ  
C4BPA  
SUMF1  
TRDMT1  
ADH1B  
MIR18A  
HSPA14  
AKAP7  
WRAP53  
SV2A

NTRK3  
PLD2  
BLZF1  
DSTYK  
C1QTNF3  
FIS1  
STIM2  
ZDHHC17  
MTRNR2L8  
SLC12A4  
CD69  
ITGAX  
FGFR2  
VIPR1  
CYSLTR1  
RNF214  
MSBP1  
TRPM4  
SLC1A6  
TIAL1  
NRAS  
SMARCA1  
MIR6501  
MIR361  
FOXC1  
CFB

OLIG2  
MIR638  
GPHA2  
TGFB1  
ACACA  
UGGT2  
EMC8  
VOPP1  
MARCHF10  
TAFA4  
SCARB2  
EIF2AK3  
CHRNA2  
FOXC2  
RFXANK  
MYDGF  
GIP  
PTPN3  
MS  
DCDC2  
HTR1D  
TPM3  
NCS1  
TNFSF9  
PRDX2  
NTF4

LPIN1  
KLK15  
VEGFD  
MESP2  
ELOB  
CD226  
NEU1  
WNT1  
CCS  
MICAL2  
KIR2DL1  
A2M  
HAND2  
NMT1  
SYT11  
FGF5  
MIR410  
MTDH  
IFNAR1  
MIR186  
HRH1  
MDK  
MAP4K2  
SDC4  
CISD2  
ELP1

GPX4  
CYP46A1  
CDH2  
CSNK1D  
KCNK9  
CACNA1E  
TRPV3  
HTR1E  
LAPTM4A  
KCNK18  
DCAF8  
SLC39A2  
CDR1  
MTRNR2L5  
GIPR  
SENP3  
PEPD  
HLX  
RNF144B  
SOX2  
IMPA1  
CEBPB  
S1PR2  
GBE1  
OCLN  
CSK

ADCY1  
SLC45A2  
ZRANB3  
CASQ2  
SPI1  
PSMB8  
MIR28  
PTPA  
GJD2  
ACVR2A  
SCFD1  
CHRNA5  
EZR  
MEF2A  
HBEGF  
TUBA1B  
PAX6  
MAP3K5  
ELOC  
PEX2  
CCL22  
MIR330  
KCNIP2  
MIR494  
HTR1F  
SLC5A7

KCNK10  
RAMP3  
ARHGEF16  
KCNS1  
DPYSL5  
FHL5  
KCNK5  
CALCB  
TMEM67  
MRGPRG-AS1  
IL23A  
HCN4  
COL9A2  
GJC1  
DROSHA  
GFRA1  
TNNI3K  
NINJ1  
CEBPA  
HAS2  
PIK3CB  
BAG3  
ALOX15B  
PLK4  
HLA-S  
RIPK1

FKBP4  
MYOG  
IRX4  
CIB1  
TBX2  
BCKDHA  
GCSH  
ZFPM2  
COX8A  
MED15  
PGAP1  
EXOSC10  
ZNF74  
LMBRD1  
CENPB  
GKN1  
PCDH18  
TSSK1B  
LAX1  
RIMBP2  
AAR2  
UFD1  
HUS1B  
GGACT  
KCTD19  
GLOD5

QARS1  
STMND1  
TSIX  
HSD17B10  
KIAA0586  
MIR106B  
MIR92A1  
LMO4  
GNE  
MSH6  
MLH1  
SGSH  
ATXN1  
OLIG1  
ARSH  
YWHAZ  
EPX  
POLR1F  
SERPINA10  
CAPN5  
CD2AP  
CPT1B  
FSTL1  
SOX17  
PER2  
YAP1

SMPD2  
MOAP1  
INTS5  
IGFBP7  
SGCB  
AKT1S1  
MIR23A  
CDR1-AS  
TAT  
TFPI2  
AP2B1  
LINGO1  
MRE11  
DHX37  
MFF  
ATP2B4  
RAP1A  
PPP2R2B  
CLOCK  
ATF4  
SNHG1  
HLA-G  
JUP  
F2RL3  
SIRT4  
INPP5K

CDH23  
POSTN  
LAMA4  
PRMT1  
PTPRJ  
PARVA  
PPIA  
TREM1  
HSPE1  
ZBTB7C  
TSC22D3  
SESN2  
EFNB2  
SLC6A9  
HCRTR1  
DLD  
NISCH  
KRT19  
MAZ  
MYOM2  
MIR424  
APC  
MSH2  
POLD1  
BST1  
PRG2

ANO5  
STBD1  
HAR1B  
KIR2DL3  
KIR2DL2  
KIR2DS2  
KIR2DS1  
FGF10  
ST3GAL4  
KCNJ8  
NID1  
TEAD1  
MIR766  
AQP3  
LRP2  
LAMA2  
GAMT  
TIMM8A  
PPARGC1B  
GPR68  
SNHG16  
PLA2G15  
PLEKHG1  
CAMK2D  
VGLL4  
MSI1

FTH1  
SPTBN2  
MYOZ2  
UCN2  
C1QTNF9  
ITPKC  
GNPTAB  
GCM2  
NRG2  
PARL  
DGCR2  
ELP4  
OPA3  
TOMM20  
DR1  
SLC25A46  
DENR  
ZNF274  
ZNF2  
CDR2L  
THBS2  
OGN  
CMYA5  
TERF2  
RPS6KB1  
MIR486-1

PARP2  
PARP4  
SLC9A2  
PARP3  
GBA3  
ITGB8  
TNXA  
CDH1  
NPAS4  
TERF1  
TP63  
PLSCR3  
TATDN1  
MRPL52  
EMILIN3  
FGF13  
AKT3  
ANXA2  
DSG2  
CSF2RA  
ACD  
POT1  
TERF2IP  
TEP1  
PAFAH2  
EFNB1

DIABLO  
RAF1  
SHC1  
CARD16  
CIDEA  
ELAVL3  
TRIM72  
SLC23A2  
ITGA7  
TRAF2  
MIR485  
IRAK4  
TJP2  
POU5F1  
CYGB  
FAH  
PDE11A  
SNHG12  
OPRL1  
MSR1  
CPE  
SERPINB2  
PIGF  
NOS1AP  
PAPPA2  
MIRLET7F1

INPPL1  
ASAH1  
AGRN  
NRF1  
TCAP  
PNPLA3  
PMS1  
BARD1  
PACC1  
ADAM10  
HSPA9  
MIR532  
MIR487B  
SRF  
SLC4A7  
ASIC2  
MIR15B  
LMAN1  
GSS  
ATP2A3  
PPP3CB  
ABCC5  
GSTA4  
OIP5-AS1  
BIRC3  
ACSS2

PDLIM1  
ALDH9A1  
GLUD1  
IL3RA  
MIR200A  
ZNF98  
MTRFR  
ACADM  
EIF2S1  
FCN3  
MOV10  
PGK1  
CYP2C18  
PPP1R15A  
SRR  
CCND2  
FHL1  
XRCC5  
ATG5  
CRHR2  
TTPA  
RBM8A  
SYN2  
TRAPPC10  
CGB3  
MIR193A

TPI1  
AMD1  
KHSRP  
FTMT  
EEF2  
COL18A1  
SEN2  
SLC1A4  
FBLN1  
PRG4  
CCT8  
LCORL  
COQ8B  
CUL3  
FHL2  
GLI3  
RDX  
MITF  
CACNB3  
CACNB1  
UBQLN1  
SCNN1D  
ATP5PF  
CLCN3  
MIRLET7F2  
SLC22A5

DICER1  
GPRC6A  
DGKQ  
FUT3  
APOBEC2  
MEPE  
PTPRU  
DLGAP4  
CABIN1  
GOSR1  
SHOX  
ADGRL1  
MIR181C  
DNM2  
PBX1  
GLB1  
LAMB1  
KCNJ6  
CACNA1F  
ETFA  
ROBO1  
NPY2R  
RPS6  
CHRNE  
EEF1A1  
RGS4

ANKRD1  
PRKRA  
WWP1  
RHD  
UPF1  
PLEK  
DCAF17  
MIR455  
VASH1  
BAG6  
IFNE  
KRT7  
CD47  
SLC29A3  
IL12RB2  
POLR1C  
RHOT1  
SLC17A6  
SERPINE2  
SLC17A7  
AGO2  
WBP1L  
MIR139  
MIR1306  
MIR497  
MYOD1

PHB  
CCL21  
CYTL1  
ACKR2  
MIR1-1  
GPI  
MAP3K14  
FRMD4B  
GATD3  
F11R  
ITGA6  
EPHB2  
MYLK2  
PLD1  
GJB2  
MMP19  
HCN2  
AOX1  
COPS5  
MYL1  
SPRED1  
MICA  
MIP  
ITPKB  
PROK2  
TNFRSF10B

ITGB4  
MIR217  
MIR665  
SLC8A2  
PEBP1  
ACVR2B  
STAT6  
RPA1  
ALPP  
GPR37  
CYC1  
LAMB2  
FEN1  
MDH1  
PDIA3  
ACAA2  
COL6A2  
XRCC4  
COL6A1  
CD82  
TPP1  
SLC22A8  
ABCB10  
BCAP31  
ELAVL2  
CHM

IL17B  
THBS3  
RBP3  
ZMIZ1  
MKKS  
PEG3  
ADAMTS9  
ATG14  
ADPRH  
RNF126  
NARS1  
MIR26A2  
HSPA12B  
MCAM  
MIR194-1  
GRK5  
MDFI  
SAA2  
PLPP1  
FLJ16779  
ITGB5  
MT2A  
TRIM65  
TRIM47  
SNORD118  
ANXA6

MIR101-1  
GPR17  
HMCN1  
ITGA8  
ITGA9  
ITGA11  
ITGA10  
ITGAD  
PPP2CB  
ADAMTS4  
STC2  
GATA2  
SUMO2  
ANKRD2  
SP8  
GPC3  
LONP1  
SLC1A5  
VAV2  
DHX9  
DAB2IP  
CLEC4A  
LOC111365141  
MAP3K1  
MAP2K7  
HELLS

FAP  
FRZB  
MEIS1  
NDRG2  
TMEM196  
MIR3146  
FCER1G  
GSTA2  
AQP8  
SCG5  
EFS  
SIVA1  
AHR  
DBT  
PARG  
AZIN2  
TMEM107  
H2BC3  
MIR544A  
MIR1264  
CSF2RB  
PLCD1  
PRKCI  
PRLR  
SLC27A4  
SLC6A6

AKAP13  
SLCO2B1  
FLRT3  
ID1  
LAMC1  
SLC38A1  
SIRPA  
DYNLL1  
CCT3  
BBC3  
ESAM  
PCSK6  
RAB1A  
BIK  
CCT4  
SLC16A4  
MUC2  
BCL2L14  
FHOD1  
HIGD1A  
DCTN6  
APOO  
CCL23  
LANCL1  
NRDC  
MIR26A1

MIR194-2  
ZFAS1  
HOTAIRM1  
HOXA-AS2  
MIR216B  
MIR496  
CCAT2  
MIR1202  
HOXB-AS2  
MIR448  
C20orf181  
CERNA3  
TSPAN33  
PCYT1A  
GABPA  
MTCO2P12  
COX2  
CHDH  
POLDIP2  
MIR137  
MIR19A  
COX1  
ACSM3  
SLC25A1  
CAD  
MIR874

MIR499B  
PIIF  
PGR-AS1  
AHSA1  
RBM45  
CRK  
MLKL  
RCOR1  
POU2F3  
RNF19A  
GLP1R  
GPER1  
IRF4  
KCNJ13  
MIR107  
TNFSF12-TNFSF13  
NUBP1  
CKLF  
CLEC1B  
PIN1  
PPID  
TUG1  
ACKR3  
MOK  
HPSE2  
SULT1E1

AIMP2  
NEIL1  
NR4A3  
COASY  
ULK1  
TSLP  
HSPB3  
MCU  
SLC33A1  
GRAP2  
ZGLP1  
MIR298  
MIR922  
DEFB4B  
MIR1203  
MIR664A  
HOTTIP  
MIR4656  
EDIL3  
EBI3  
EMSLR  
LOC101929707  
IRF9  
ERICD  
AGR2  
GNLY

SORBS1  
CXCR6  
TRAF3IP2  
PLK2  
LILRB1  
RNPS1  
FASTK  
PDIA5  
DUSP14  
VSIG4  
CIRBP  
H3P7  
FOPNL  
TAF8  
CRMP1  
DEFB104A  
SRXN1  
CRYZ  
RMDN2  
C5orf38  
CYP2B7P  
DLG2  
EGR2  
EGR4  
ELK1  
FCGR3A

MCF2L2  
TBC1D9  
MLC1  
ARC  
CRTC1  
TRS-AGA2-3  
SPIDR  
MMD  
MAPK8IP2  
SMUG1  
DAPK2  
BCL2L13  
ABCA4  
HECTD1  
GALNT2  
HSPA12A  
FAM98A  
IS1  
COPD  
GEM  
NAAA  
GLI2  
GOT2  
SNHG15  
GPR42  
REM1

GRINA  
NOP53  
HDLBP  
HLA-C  
AOC2  
HES1  
ID2  
ACTBL2  
MAGEB5  
IKBKB  
INSRR  
JAK3  
AREG  
KIR3DL1  
KIR3DL2  
C11orf96  
LAD1  
LAMA5  
LAMC2  
LCP1  
LIG4  
LINC01194  
CMT  
MIRLET7E  
MIR106A  
MIR129-2

MIR152  
MIR219A1  
MIR31  
ARRB2  
MRC1  
POTEKP  
MSD  
PLF  
CYTB  
MUSK  
ATF3  
NM  
OATP1  
P2RY2  
DEFB104B  
AK3  
MLXIPL  
RMDN1  
PCSK1  
MZB1  
MS4A4A  
STK26  
ASIC5  
PKM  
PLP1  
PNN

NANS  
POR  
POU2F1  
TOMM7  
TMEM132A  
ANO1  
RMDN3  
IMPACT  
MIR449A  
PRH1  
PRH2  
SYBU  
VPS35  
RNF130  
MASP1  
MMP26  
ANKS1B  
PDXP  
MRS2  
MIR363  
NDRG3  
NLN  
SEMA6A  
PTMA  
PTMAP4  
PRX

NLRC4  
RAPSN  
RGS7  
RPS20  
RTN1  
TSPAN31  
CCL19  
NEUROG2  
CRLF2  
POTEM  
SNHG6  
ITSN1  
GORASP1  
SHMT1  
SMURF2  
NMNAT1  
MARCHF7  
NBEAL1  
MARCKSL1  
SLCO1A2  
CYP4F12  
SMN2  
STAR  
SCARNA6  
STIM1  
BRS3

SYT1  
BTF3P11  
MIR605  
MIR608  
MIR618  
SERPING1  
TM7SF2  
TRC-GCA24-1  
ACTG2  
UBE2L3  
UGT2B4  
VPS51  
UTRN  
REEP5  
MUL1  
DHX40  
EHMT1  
ARHGEF5  
MAP9  
ERMP1  
WLS  
FLAD1  
AKAP1  
QTRT1  
PLVAP  
TSPAN10

MINDY4  
KLF11  
NTNG2  
KDM2B  
ACCS  
GPR65  
ORAI1  
PIAS1  
OTULIN  
USP14  
LPAR2  
XPR1  
METTL18  
NOG  
MSC  
SPECC1  
DNER  
ZFYVE9  
GTPBP1  
SNCAIP  
KCNC2  
TACR3  
PDE1  
NMDAR  
OPR  
PARP

AGAP2

ATP7B

MAPKAPK2

P2RX5

TRNL1

---

**Table SXII.** GO functional enrichment results of key target genes.

|                       |                                                                              |           |           |                       |                       |                       |                                                     |       |
|-----------------------|------------------------------------------------------------------------------|-----------|-----------|-----------------------|-----------------------|-----------------------|-----------------------------------------------------|-------|
| A, Biological process |                                                                              |           |           |                       |                       |                       |                                                     |       |
| ID                    | Description                                                                  | GeneRatio | BgRatio   | P-value               | Adjusted P-value      | q-value               | GeneID                                              | Count |
| GO:0006979            | response to oxidative stress                                                 | 10/31     | 458/18866 | 1.81×10 <sup>-9</sup> | 1.99×10 <sup>-6</sup> | 1.03×10 <sup>-6</sup> | ADA/ALOX5/DUSP1/G6PD/LCN2/MMP9/MPO/PTGS1/PTGS2/TLR4 | 10    |
| GO:0043312            | neutrophil degranulation                                                     | 10/31     | 487/18866 | 3.27×10 <sup>-9</sup> | 1.99×10 <sup>-6</sup> | 1.03×10 <sup>-6</sup> | ALOX5/APRT/GAA/IGF2R/LCN2/MGAM/MMP9/MPO/PTAFR/SELL  | 10    |
| GO:0002283            | neutrophil activation involved in immune response                            | 10/31     | 490/18866 | 3.47×10 <sup>-9</sup> | 1.99×10 <sup>-6</sup> | 1.03×10 <sup>-6</sup> | ALOX5/APRT/GAA/IGF2R/LCN2/MGAM/MMP9/MPO/PTAFR/SELL  | 10    |
| GO:0072593            | reactive oxygen species metabolic process                                    | 8/31      | 288/18866 | 1.56×10 <sup>-8</sup> | 6.71×10 <sup>-6</sup> | 3.49×10 <sup>-6</sup> | ALOX5/G6PD/HDAC4/HK2/MPO/PTGS2/STAT3/TLR4           | 8     |
| GO:2000377            | regulation of reactive oxygen species metabolic process                      | 7/31      | 200/18866 | 2.87×10 <sup>-8</sup> | 9.89×10 <sup>-6</sup> | 5.14×10 <sup>-6</sup> | ALOX5/G6PD/HDAC4/HK2/PTGS2/STAT3/TLR4               | 7     |
| GO:1903409            | reactive oxygen species biosynthetic process                                 | 6/31      | 128/18866 | 5.55×10 <sup>-8</sup> | 1.59×10 <sup>-5</sup> | 8.29×10 <sup>-6</sup> | ALOX5/HDAC4/MPO/PTGS2/STAT3/TLR4                    | 6     |
| GO:0090257            | regulation of muscle system process                                          | 7/31      | 256/18866 | 1.55×10 <sup>-7</sup> | 3.82×10 <sup>-5</sup> | 1.99×10 <sup>-5</sup> | ADA/G6PD/HDAC4/PIK3CG/PPP3CA/PTAFR/PTGS2            | 7     |
| GO:0003012            | muscle system process                                                        | 8/31      | 467/18866 | 6.35×10 <sup>-7</sup> | 1.15×10 <sup>-4</sup> | 5.98×10 <sup>-5</sup> | ADA/G6PD/GAA/HDAC4/PIK3CG/PPP3CA/PTAFR/PTGS2        | 8     |
| GO:0019371            | cyclooxygenase pathway                                                       | 3/31      | 11/18866  | 6.57×10 <sup>-7</sup> | 1.15×10 <sup>-4</sup> | 5.98×10 <sup>-5</sup> | PTGS1/PTGS2/TBXAS1                                  | 3     |
| GO:0048661            | positive regulation of smooth muscle cell proliferation                      | 5/31      | 103/18866 | 6.68×10 <sup>-7</sup> | 1.15×10 <sup>-4</sup> | 5.98×10 <sup>-5</sup> | HDAC4/HMGCR/MMP9/PTAFR/PTGS2                        | 5     |
| GO:1903426            | regulation of reactive oxygen species biosynthetic process                   | 5/31      | 107/18866 | 8.07×10 <sup>-7</sup> | 1.26×10 <sup>-4</sup> | 6.57×10 <sup>-5</sup> | ALOX5/HDAC4/PTGS2/STAT3/TLR4                        | 5     |
| GO:0032496            | response to lipopolysaccharide                                               | 7/31      | 334/18866 | 9.34×10 <sup>-7</sup> | 1.34×10 <sup>-4</sup> | 6.97×10 <sup>-5</sup> | ALPL/LCN2/LY96/MPO/PTAFR/PTGS2/TLR4                 | 7     |
| GO:0002237            | response to molecule of bacterial origin                                     | 7/31      | 356/18866 | 1.43×10 <sup>-6</sup> | 1.89×10 <sup>-4</sup> | 9.85×10 <sup>-5</sup> | ALPL/LCN2/LY96/MPO/PTAFR/PTGS2/TLR4                 | 7     |
| GO:0062197            | cellular response to chemical stress                                         | 7/31      | 360/18866 | 1.54×10 <sup>-6</sup> | 1.90×10 <sup>-4</sup> | 9.85×10 <sup>-5</sup> | ALOX5/G6PD/LCN2/MMP9/MPO/PTGS2/TLR4                 | 7     |
| GO:0019369            | arachidonic acid metabolic process                                           | 4/31      | 58/18866  | 2.38×10 <sup>-6</sup> | 2.31×10 <sup>-4</sup> | 1.20×10 <sup>-4</sup> | ALOX5/PTGS1/PTGS2/TBXAS1                            | 4     |
| GO:0046683            | response to organophosphorus                                                 | 5/31      | 134/18866 | 2.46×10 <sup>-6</sup> | 2.31×10 <sup>-4</sup> | 1.20×10 <sup>-4</sup> | DUSP1/PIK3CG/PTAFR/PTGS2/SELL                       | 5     |
| GO:0033002            | muscle cell proliferation                                                    | 6/31      | 244/18866 | 2.47×10 <sup>-6</sup> | 2.31×10 <sup>-4</sup> | 1.20×10 <sup>-4</sup> | HDAC4/HMGCR/MMP9/PTAFR/PTGS2/STAT3                  | 6     |
| GO:0006636            | unsaturated fatty acid biosynthetic process                                  | 4/31      | 59/18866  | 2.55×10 <sup>-6</sup> | 2.31×10 <sup>-4</sup> | 1.20×10 <sup>-4</sup> | ALOX5/PTGS1/PTGS2/TBXAS1                            | 4     |
| GO:0046456            | icosanoid biosynthetic process                                               | 4/31      | 59/18866  | 2.55×10 <sup>-6</sup> | 2.31×10 <sup>-4</sup> | 1.20×10 <sup>-4</sup> | ALOX5/PTGS1/PTGS2/TBXAS1                            | 4     |
| GO:0014074            | response to purine-containing compound                                       | 5/31      | 149/18866 | 4.14×10 <sup>-6</sup> | 3.56×10 <sup>-4</sup> | 1.85×10 <sup>-4</sup> | DUSP1/PIK3CG/PTAFR/PTGS2/SELL                       | 5     |
| GO:0050727            | regulation of inflammatory response                                          | 7/31      | 425/18866 | 4.62×10 <sup>-6</sup> | 3.79×10 <sup>-4</sup> | 1.97×10 <sup>-4</sup> | ADA/ALOX5/MMP9/PIK3CG/PTGS2/STAT3/TLR4              | 7     |
| GO:0044262            | cellular carbohydrate metabolic process                                      | 6/31      | 294/18866 | 7.22×10 <sup>-6</sup> | 5.65×10 <sup>-4</sup> | 2.94×10 <sup>-4</sup> | GAA/HDAC4/HK2/MGAM/PTAFR/STAT3                      | 6     |
| GO:0006937            | regulation of muscle contraction                                             | 5/31      | 173/18866 | 8.57×10 <sup>-6</sup> | 5.91×10 <sup>-4</sup> | 3.07×10 <sup>-4</sup> | ADA/HDAC4/PIK3CG/PTAFR/PTGS2                        | 5     |
| GO:0048660            | regulation of smooth muscle cell proliferation                               | 5/31      | 173/18866 | 8.57×10 <sup>-6</sup> | 5.91×10 <sup>-4</sup> | 3.07×10 <sup>-4</sup> | HDAC4/HMGCR/MMP9/PTAFR/PTGS2                        | 5     |
| GO:1903522            | regulation of blood circulation                                              | 6/31      | 303/18866 | 8.57×10 <sup>-6</sup> | 5.91×10 <sup>-4</sup> | 3.07×10 <sup>-4</sup> | ADA/GAA/HDAC4/PIK3CG/PTAFR/PTGS2                    | 6     |
| GO:0048659            | smooth muscle cell proliferation                                             | 5/31      | 175/18866 | 9.06×10 <sup>-6</sup> | 5.93×10 <sup>-4</sup> | 3.08×10 <sup>-4</sup> | HDAC4/HMGCR/MMP9/PTAFR/PTGS2                        | 5     |
| GO:0031667            | response to nutrient levels                                                  | 7/31      | 473/18866 | 9.3×10 <sup>-6</sup>  | 5.93×10 <sup>-4</sup> | 3.08×10 <sup>-4</sup> | ADA/ALPL/G6PD/HMGCR/LCN2/MPO/PTGS2                  | 7     |
| GO:0034599            | cellular response to oxidative stress                                        | 6/31      | 310/18866 | 9.77×10 <sup>-6</sup> | 6.01×10 <sup>-4</sup> | 3.12×10 <sup>-4</sup> | ALOX5/G6PD/LCN2/MMP9/MPO/TLR4                       | 6     |
| GO:0007568            | aging                                                                        | 6/31      | 319/18866 | 1.15×10 <sup>-5</sup> | 6.83×10 <sup>-4</sup> | 3.55×10 <sup>-4</sup> | ADA/HMGCR/MPO/PPP3CA/PTGS2/STAT3                    | 6     |
| GO:0001516            | prostaglandin biosynthetic process                                           | 3/31      | 30/18866  | 1.58×10 <sup>-5</sup> | 8.80×10 <sup>-4</sup> | 4.57×10 <sup>-4</sup> | PTGS1/PTGS2/TBXAS1                                  | 3     |
| GO:0046457            | prostanoid biosynthetic process                                              | 3/31      | 30/18866  | 1.58×10 <sup>-5</sup> | 8.80×10 <sup>-4</sup> | 4.57×10 <sup>-4</sup> | PTGS1/PTGS2/TBXAS1                                  | 3     |
| GO:0016052            | carbohydrate catabolic process                                               | 5/31      | 200/18866 | 1.73×10 <sup>-5</sup> | 9.14×10 <sup>-4</sup> | 4.75×10 <sup>-4</sup> | GAA/HDAC4/HK2/MGAM/STAT3                            | 5     |
| GO:0045987            | positive regulation of smooth muscle contraction                             | 3/31      | 31/18866  | 1.75×10 <sup>-5</sup> | 9.14×10 <sup>-4</sup> | 4.75×10 <sup>-4</sup> | ADA/PTAFR/PTGS2                                     | 3     |
| GO:0006936            | muscle contraction                                                           | 6/31      | 362/18866 | 2.35×10 <sup>-5</sup> | 1.16×10 <sup>-3</sup> | 6.02×10 <sup>-4</sup> | ADA/GAA/HDAC4/PIK3CG/PTAFR/PTGS2                    | 6     |
| GO:1901570            | fatty acid derivative biosynthetic process                                   | 4/31      | 103/18866 | 2.35×10 <sup>-5</sup> | 1.16×10 <sup>-3</sup> | 6.02×10 <sup>-4</sup> | ALOX5/PTGS1/PTGS2/TBXAS1                            | 4     |
| GO:0001676            | long-chain fatty acid metabolic process                                      | 4/31      | 113/18866 | 3.39×10 <sup>-5</sup> | 1.62×10 <sup>-3</sup> | 8.43×10 <sup>-4</sup> | ALOX5/PTGS1/PTGS2/TBXAS1                            | 4     |
| GO:0000302            | response to reactive oxygen species                                          | 5/31      | 235/18866 | 3.75×10 <sup>-5</sup> | 1.75×10 <sup>-3</sup> | 9.07×10 <sup>-4</sup> | ADA/DUSP1/LCN2/MMP9/MPO                             | 5     |
| GO:0042493            | response to drug                                                             | 6/31      | 397/18866 | 3.94×10 <sup>-5</sup> | 1.77×10 <sup>-3</sup> | 9.22×10 <sup>-4</sup> | ADA/HDAC4/LCN2/PPP3CA/PTGS2/STAT3                   | 6     |
| GO:0033559            | unsaturated fatty acid metabolic process                                     | 4/31      | 118/18866 | 4.02×10 <sup>-5</sup> | 1.77×10 <sup>-3</sup> | 9.22×10 <sup>-4</sup> | ALOX5/PTGS1/PTGS2/TBXAS1                            | 4     |
| GO:0120254            | olefinic compound metabolic process                                          | 4/31      | 121/18866 | 4.43×10 <sup>-5</sup> | 1.87×10 <sup>-3</sup> | 9.71×10 <sup>-4</sup> | ALOX5/PTGS1/PTGS2/TBXAS1                            | 4     |
| GO:0042593            | glucose homeostasis                                                          | 5/31      | 245/18866 | 4.57×10 <sup>-5</sup> | 1.87×10 <sup>-3</sup> | 9.71×10 <sup>-4</sup> | ALOX5/HK2/HMGCR/PPP3CA/STAT3                        | 5     |
| GO:0006690            | icosanoid metabolic process                                                  | 4/31      | 122/18866 | 4.58×10 <sup>-5</sup> | 1.87×10 <sup>-3</sup> | 9.71×10 <sup>-4</sup> | ALOX5/PTGS1/PTGS2/TBXAS1                            | 4     |
| GO:0033500            | carbohydrate homeostasis                                                     | 5/31      | 246/18866 | 4.66×10 <sup>-5</sup> | 1.87×10 <sup>-3</sup> | 9.71×10 <sup>-4</sup> | ALOX5/HK2/HMGCR/PPP3CA/STAT3                        | 5     |
| GO:0019693            | ribose phosphate metabolic process                                           | 6/31      | 427/18866 | 5.91×10 <sup>-5</sup> | 2.32×10 <sup>-3</sup> | 1.20×10 <sup>-3</sup> | APRT/G6PD/HDAC4/HK2/HMGCR/STAT3                     | 6     |
| GO:0045933            | positive regulation of muscle contraction                                    | 3/31      | 47/18866  | 6.2×10 <sup>-5</sup>  | 2.37×10 <sup>-3</sup> | 1.23×10 <sup>-3</sup> | ADA/PTAFR/PTGS2                                     | 3     |
| GO:0006692            | prostanoid metabolic process                                                 | 3/31      | 49/18866  | 7.03×10 <sup>-5</sup> | 2.57×10 <sup>-3</sup> | 1.34×10 <sup>-3</sup> | PTGS1/PTGS2/TBXAS1                                  | 3     |
| GO:0006693            | prostaglandin metabolic process                                              | 3/31      | 49/18866  | 7.03×10 <sup>-5</sup> | 2.57×10 <sup>-3</sup> | 1.34×10 <sup>-3</sup> | PTGS1/PTGS2/TBXAS1                                  | 3     |
| GO:0006163            | purine nucleotide metabolic process                                          | 6/31      | 442/18866 | 7.16×10 <sup>-5</sup> | 2.57×10 <sup>-3</sup> | 1.34×10 <sup>-3</sup> | ADA/APRT/HDAC4/HK2/HMGCR/STAT3                      | 6     |
| GO:0032760            | positive regulation of tumor necrosis factor production                      | 3/31      | 50/18866  | 7.47×10 <sup>-5</sup> | 2.63×10 <sup>-3</sup> | 1.37×10 <sup>-3</sup> | LY96/PTAFR/TLR4                                     | 3     |
| GO:1903557            | positive regulation of tumor necrosis factor superfamily cytokine production | 3/31      | 52/18866  | 8.41×10 <sup>-5</sup> | 2.90×10 <sup>-3</sup> | 1.51×10 <sup>-3</sup> | LY96/PTAFR/TLR4                                     | 3     |
| GO:0061756            | leukocyte adhesion to vascular endothelial cell                              | 3/31      | 53/18866  | 8.9×10 <sup>-5</sup>  | 3.01×10 <sup>-3</sup> | 1.56×10 <sup>-3</sup> | ALOX5/PTAFR/SELL                                    | 3     |
| GO:0051384            | response to glucocorticoid                                                   | 4/31      | 147/18866 | 9.45×10 <sup>-5</sup> | 3.13×10 <sup>-3</sup> | 1.63×10 <sup>-3</sup> | ALPL/DUSP1/PTAFR/PTGS2                              | 4     |
| GO:0072521            | purine-containing compound metabolic process                                 | 6/31      | 472/18866 | 1.03×10 <sup>-4</sup> | 3.34×10 <sup>-3</sup> | 1.74×10 <sup>-3</sup> | ADA/APRT/HDAC4/HK2/HMGCR/STAT3                      | 6     |
| GO:0009113            | purine nucleobase biosynthetic process                                       | 2/31      | 10/18866  | 1.17×10 <sup>-4</sup> | 3.72×10 <sup>-3</sup> | 1.93×10 <sup>-3</sup> | ADA/APRT                                            | 2     |
| GO:0031663            | lipopolysaccharide-mediated signaling pathway                                | 3/31      | 59/18866  | 1.23×10 <sup>-4</sup> | 3.84×10 <sup>-3</sup> | 2.00×10 <sup>-3</sup> | LY96/PTAFR/TLR4                                     | 3     |
| GO:0050729            | positive regulation of inflammatory response                                 | 4/31      | 158/18866 | 1.25×10 <sup>-4</sup> | 3.84×10 <sup>-3</sup> | 2.00×10 <sup>-3</sup> | PIK3CG/PTGS2/STAT3/TLR4                             | 4     |
| GO:1903428            | positive regulation of reactive oxygen species biosynthetic process          | 3/31      | 60/18866  | 1.29×10 <sup>-4</sup> | 3.90×10 <sup>-3</sup> | 2.03×10 <sup>-3</sup> | HDAC4/PTGS2/TLR4                                    | 3     |
| GO:0005984            | disaccharide metabolic process                                               | 2/31      | 11/18866  | 1.42×10 <sup>-4</sup> | 4.21×10 <sup>-3</sup> | 2.19×10 <sup>-3</sup> | GAA/MGAM                                            | 2     |
| GO:0031960            | response to corticosteroid                                                   | 4/31      | 164/18866 | 1.44×10 <sup>-4</sup> | 4.21×10 <sup>-3</sup> | 2.19×10 <sup>-3</sup> | ALPL/DUSP1/PTAFR/PTGS2                              | 4     |
| GO:0006940            | regulation of smooth muscle contraction                                      | 3/31      | 65/18866  | 1.64×10 <sup>-4</sup> | 4.59×10 <sup>-3</sup> | 2.39×10 <sup>-3</sup> | ADA/PTAFR/PTGS2                                     | 3     |
| GO:2000241            | regulation of reproductive process                                           | 4/31      | 170/18866 | 1.66×10 <sup>-4</sup> | 4.59×10 <sup>-3</sup> | 2.39×10 <sup>-3</sup> | ADA/DUSP1/HDAC4/PTAFR                               | 4     |
| GO:0007584            | response to nutrient                                                         | 4/31      | 171/18866 | 1.69×10 <sup>-4</sup> | 4.59×10 <sup>-3</sup> | 2.39×10 <sup>-3</sup> | ADA/ALPL/HMGCR/PTGS2                                | 4     |
| GO:0032490            | detection of molecule of bacterial origin                                    | 2/31      | 12/18866  | 1.71×10 <sup>-4</sup> | 4.59×10 <sup>-3</sup> | 2.39×10 <sup>-3</sup> | LY96/TLR4                                           | 2     |
| GO:2000378            | negative regulation of reactive oxygen species metabolic process             | 3/31      | 66/18866  | 1.71×10 <sup>-4</sup> | 4.59×10 <sup>-3</sup> | 2.39×10 <sup>-3</sup> | G6PD/HK2/STAT3                                      | 3     |
| GO:0006633            | fatty acid biosynthetic process                                              | 4/31      | 173/18866 | 1.77×10 <sup>-4</sup> | 4.59×10 <sup>-3</sup> | 2.39×10 <sup>-3</sup> | ALOX5/PTGS1/PTGS2/TBXAS1                            | 4     |
| GO:0045123            | cellular extravasation                                                       | 3/31      | 67/18866  | 1.79×10 <sup>-4</sup> | 4.59×10 <sup>-3</sup> | 2.39×10 <sup>-3</sup> | PIK3CG/PTAFR/SELL                                   | 3     |
| GO:1900015            | regulation of cytokine production involved in inflammatory response          | 3/31      | 67/18866  | 1.79×10 <sup>-4</sup> | 4.59×10 <sup>-3</sup> | 2.39×10 <sup>-3</sup> | ALOX5/STAT3/TLR4                                    | 3     |
| GO:0001659            | temperature homeostasis                                                      | 4/31      | 174/18866 | 1.81×10 <sup>-4</sup> | 4.59×10 <sup>-3</sup> | 2.39×10 <sup>-3</sup> | LCN2/PTGS2/STAT3/TLR4                               | 4     |
| GO:1901568            | fatty acid derivative metabolic process                                      | 4/31      | 175/18866 | 1.85×10 <sup>-4</sup> | 4.62×10 <sup>-3</sup> | 2.40×10 <sup>-3</sup> | ALOX5/PTGS1/PTGS2/TBXAS1                            | 4     |

|            |                                                                                 |      |           |                       |                       |                       |                              |   |
|------------|---------------------------------------------------------------------------------|------|-----------|-----------------------|-----------------------|-----------------------|------------------------------|---|
| GO:0002679 | respiratory burst involved in defense response                                  | 2/31 | 13/18866  | 2.02×10 <sup>-4</sup> | 4.88×10 <sup>-3</sup> | 2.54×10 <sup>-3</sup> | MPO/PIK3CG                   | 2 |
| GO:0002534 | cytokine production involved in inflammatory response                           | 3/31 | 70/18866  | 2.04×10 <sup>-4</sup> | 4.88×10 <sup>-3</sup> | 2.54×10 <sup>-3</sup> | ALOX5/STAT3/TLR4             | 3 |
| GO:0050795 | regulation of behavior                                                          | 3/31 | 70/18866  | 2.04×10 <sup>-4</sup> | 4.88×10 <sup>-3</sup> | 2.54×10 <sup>-3</sup> | ADA/HDAC4/STAT3              | 3 |
| GO:0043173 | nucleotide salvage                                                              | 2/31 | 14/18866  | 2.35×10 <sup>-4</sup> | 5.47×10 <sup>-3</sup> | 2.84×10 <sup>-3</sup> | ADA/APRT                     | 2 |
| GO:1903799 | negative regulation of production of miRNAs involved in gene silencing by miRNA | 2/31 | 14/18866  | 2.35×10 <sup>-4</sup> | 5.47×10 <sup>-3</sup> | 2.84×10 <sup>-3</sup> | PPP3CA/STAT3                 | 2 |
| GO:1903524 | positive regulation of blood circulation                                        | 3/31 | 76/18866  | 2.60×10 <sup>-4</sup> | 5.98×10 <sup>-3</sup> | 3.11×10 <sup>-3</sup> | ADA/PTAFR/PTGS2              | 3 |
| GO:0046902 | regulation of mitochondrial membrane permeability                               | 3/31 | 77/18866  | 2.71×10 <sup>-4</sup> | 5.98×10 <sup>-3</sup> | 3.11×10 <sup>-3</sup> | HK2/PPP3R1/STAT3             | 3 |
| GO:0043101 | purine-containing compound salvage                                              | 2/31 | 15/18866  | 2.71×10 <sup>-4</sup> | 5.98×10 <sup>-3</sup> | 3.11×10 <sup>-3</sup> | ADA/APRT                     | 2 |
| GO:0045820 | negative regulation of glycolytic process                                       | 2/31 | 15/18866  | 2.71×10 <sup>-4</sup> | 5.98×10 <sup>-3</sup> | 3.11×10 <sup>-3</sup> | HDAC4/STAT3                  | 2 |
| GO:0043900 | regulation of multi-organism process                                            | 3/31 | 78/18866  | 2.81×10 <sup>-4</sup> | 6.13×10 <sup>-3</sup> | 3.19×10 <sup>-3</sup> | ADA/HDAC4/PTAFR              | 3 |
| GO:0071260 | cellular response to mechanical stimulus                                        | 3/31 | 79/18866  | 2.92×10 <sup>-4</sup> | 6.29×10 <sup>-3</sup> | 3.27×10 <sup>-3</sup> | HDAC4/PTGS2/TLR4             | 3 |
| GO:0010038 | response to metal ion                                                           | 5/31 | 366/18866 | 3.00×10 <sup>-4</sup> | 6.38×10 <sup>-3</sup> | 3.32×10 <sup>-3</sup> | DUSP1/G6PD/MMP9/PPP3CA/PTGS2 | 5 |
| GO:0019372 | lipoxygenase pathway                                                            | 2/31 | 16/18866  | 3.09×10 <sup>-4</sup> | 6.49×10 <sup>-3</sup> | 3.38×10 <sup>-3</sup> | ALOX5/PTGS2                  | 2 |
| GO:0071222 | cellular response to lipopolysaccharide                                         | 4/31 | 208/18866 | 3.58×10 <sup>-4</sup> | 7.42×10 <sup>-3</sup> | 3.86×10 <sup>-3</sup> | LCN2/LY96/PTAFR/TLR4         | 4 |
| GO:0009612 | response to mechanical stimulus                                                 | 4/31 | 209/18866 | 3.64×10 <sup>-4</sup> | 7.47×10 <sup>-3</sup> | 3.88×10 <sup>-3</sup> | HDAC4/MPO/PTGS2/TLR4         | 4 |
| GO:0097756 | negative regulation of blood vessel diameter                                    | 3/31 | 86/18866  | 3.75×10 <sup>-4</sup> | 7.60×10 <sup>-3</sup> | 3.95×10 <sup>-3</sup> | HMGR/PTAFR/PTGS2             | 3 |
| GO:0046112 | nucleobase biosynthetic process                                                 | 2/31 | 18/18866  | 3.93×10 <sup>-4</sup> | 7.88×10 <sup>-3</sup> | 4.10×10 <sup>-3</sup> | ADA/APRT                     | 2 |
| GO:0090559 | regulation of membrane permeability                                             | 3/31 | 88/18866  | 4.01×10 <sup>-4</sup> | 7.94×10 <sup>-3</sup> | 4.13×10 <sup>-3</sup> | HK2/PPP3R1/STAT3             | 3 |
| GO:0033273 | response to vitamin                                                             | 3/31 | 91/18866  | 4.43×10 <sup>-4</sup> | 8.66×10 <sup>-3</sup> | 4.50×10 <sup>-3</sup> | ADA/ALPL/PTGS2               | 3 |
| GO:0009150 | purine ribonucleotide metabolic process                                         | 5/31 | 401/18866 | 4.56×10 <sup>-4</sup> | 8.66×10 <sup>-3</sup> | 4.50×10 <sup>-3</sup> | APRT/HDAC4/HK2/HMGR/STAT3    | 5 |
| GO:0019722 | calcium-mediated signaling                                                      | 4/31 | 222/18866 | 4.58×10 <sup>-4</sup> | 8.66×10 <sup>-3</sup> | 4.50×10 <sup>-3</sup> | ADA/HDAC4/PPP3CA/PPP3R1      | 4 |
| GO:0071219 | cellular response to molecule of bacterial origin                               | 4/31 | 222/18866 | 4.58×10 <sup>-4</sup> | 8.66×10 <sup>-3</sup> | 4.50×10 <sup>-3</sup> | LCN2/LY96/PTAFR/TLR4         | 4 |
| GO:0002532 | production of molecular mediator involved in inflammatory response              | 3/31 | 93/18866  | 4.72×10 <sup>-4</sup> | 8.66×10 <sup>-3</sup> | 4.50×10 <sup>-3</sup> | ALOX5/STAT3/TLR4             | 3 |
| GO:0051591 | response to cAMP                                                                | 3/31 | 94/18866  | 4.87×10 <sup>-4</sup> | 8.66×10 <sup>-3</sup> | 4.50×10 <sup>-3</sup> | DUSP1/PIK3CG/PTAFR           | 3 |
| GO:0006144 | purine nucleobase metabolic process                                             | 2/31 | 20/18866  | 4.87×10 <sup>-4</sup> | 8.66×10 <sup>-3</sup> | 4.50×10 <sup>-3</sup> | ADA/APRT                     | 2 |
| GO:0009168 | purine ribonucleoside monophosphate biosynthetic process                        | 2/31 | 20/18866  | 4.87×10 <sup>-4</sup> | 8.66×10 <sup>-3</sup> | 4.50×10 <sup>-3</sup> | ADA/APRT                     | 2 |
| GO:0060965 | negative regulation of gene silencing by miRNA                                  | 2/31 | 20/18866  | 4.87×10 <sup>-4</sup> | 8.66×10 <sup>-3</sup> | 4.50×10 <sup>-3</sup> | PPP3CA/STAT3                 | 2 |
| GO:0070262 | peptidyl-serine dephosphorylation                                               | 2/31 | 20/18866  | 4.87×10 <sup>-4</sup> | 8.66×10 <sup>-3</sup> | 4.50×10 <sup>-3</sup> | DUSP1/PPP3CA                 | 2 |
| GO:0007589 | body fluid secretion                                                            | 3/31 | 95/18866  | 5.02×10 <sup>-4</sup> | 8.82×10 <sup>-3</sup> | 4.59×10 <sup>-3</sup> | ADA/APRT/HK2                 | 3 |
| GO:1900543 | negative regulation of purine nucleotide metabolic process                      | 2/31 | 21/18866  | 5.38×10 <sup>-4</sup> | 9.28×10 <sup>-3</sup> | 4.83×10 <sup>-3</sup> | HDAC4/STAT3                  | 2 |
| GO:0009259 | ribonucleotide metabolic process                                                | 5/31 | 416/18866 | 5.39×10 <sup>-4</sup> | 9.28×10 <sup>-3</sup> | 4.83×10 <sup>-3</sup> | APRT/HDAC4/HK2/HMGR/STAT3    | 5 |
| GO:0009127 | purine nucleoside monophosphate biosynthetic process                            | 2/31 | 22/18866  | 5.91×10 <sup>-4</sup> | 9.87×10 <sup>-3</sup> | 5.13×10 <sup>-3</sup> | ADA/APRT                     | 2 |
| GO:0045980 | negative regulation of nucleotide metabolic process                             | 2/31 | 22/18866  | 5.91×10 <sup>-4</sup> | 9.87×10 <sup>-3</sup> | 5.13×10 <sup>-3</sup> | HDAC4/STAT3                  | 2 |
| GO:0043502 | regulation of muscle adaptation                                                 | 3/31 | 102/18866 | 6.18×10 <sup>-4</sup> | 9.87×10 <sup>-3</sup> | 5.13×10 <sup>-3</sup> | G6PD/HDAC4/PPP3CA            | 3 |
| GO:0098869 | cellular oxidant detoxification                                                 | 3/31 | 103/18866 | 6.36×10 <sup>-4</sup> | 9.87×10 <sup>-3</sup> | 5.13×10 <sup>-3</sup> | MPO/PTGS1/PTGS2              | 3 |
| GO:0009251 | glucan catabolic process                                                        | 2/31 | 23/18866  | 6.47×10 <sup>-4</sup> | 9.87×10 <sup>-3</sup> | 5.13×10 <sup>-3</sup> | GAA/MGAM                     | 2 |
| GO:0042451 | purine nucleoside biosynthetic process                                          | 2/31 | 23/18866  | 6.47×10 <sup>-4</sup> | 9.87×10 <sup>-3</sup> | 5.13×10 <sup>-3</sup> | ADA/APRT                     | 2 |
| GO:0042455 | ribonucleoside biosynthetic process                                             | 2/31 | 23/18866  | 6.47×10 <sup>-4</sup> | 9.87×10 <sup>-3</sup> | 5.13×10 <sup>-3</sup> | ADA/APRT                     | 2 |
| GO:0046129 | purine ribonucleoside biosynthetic process                                      | 2/31 | 23/18866  | 6.47×10 <sup>-4</sup> | 9.87×10 <sup>-3</sup> | 5.13×10 <sup>-3</sup> | ADA/APRT                     | 2 |
| GO:0060149 | negative regulation of posttranscriptional gene silencing                       | 2/31 | 23/18866  | 6.47×10 <sup>-4</sup> | 9.87×10 <sup>-3</sup> | 5.13×10 <sup>-3</sup> | PPP3CA/STAT3                 | 2 |
| GO:0060967 | negative regulation of gene silencing by RNA                                    | 2/31 | 23/18866  | 6.47×10 <sup>-4</sup> | 9.87×10 <sup>-3</sup> | 5.13×10 <sup>-3</sup> | PPP3CA/STAT3                 | 2 |
| GO:1900017 | positive regulation of cytokine production involved in inflammatory response    | 2/31 | 23/18866  | 6.47×10 <sup>-4</sup> | 9.87×10 <sup>-3</sup> | 5.13×10 <sup>-3</sup> | STAT3/TLR4                   | 2 |
| GO:1903798 | regulation of production of miRNAs involved in gene silencing by miRNA          | 2/31 | 23/18866  | 6.47×10 <sup>-4</sup> | 9.87×10 <sup>-3</sup> | 5.13×10 <sup>-3</sup> | PPP3CA/STAT3                 | 2 |
| GO:1904996 | positive regulation of leukocyte adhesion to vascular endothelial cell          | 2/31 | 23/18866  | 6.47×10 <sup>-4</sup> | 9.87×10 <sup>-3</sup> | 5.13×10 <sup>-3</sup> | ALOX5/PTAFR                  | 2 |
| GO:0003300 | cardiac muscle hypertrophy                                                      | 3/31 | 104/18866 | 6.54×10 <sup>-4</sup> | 9.88×10 <sup>-3</sup> | 5.14×10 <sup>-3</sup> | G6PD/HDAC4/PPP3CA            | 3 |
| GO:0071216 | cellular response to biotic stimulus                                            | 4/31 | 246/18866 | 6.73×10 <sup>-4</sup> | 1.00×10 <sup>-2</sup> | 5.20×10 <sup>-3</sup> | LCN2/LY96/PTAFR/TLR4         | 4 |
| GO:0072330 | monocarboxylic acid biosynthetic process                                        | 4/31 | 246/18866 | 6.73×10 <sup>-4</sup> | 1.00×10 <sup>-2</sup> | 5.20×10 <sup>-3</sup> | ALOX5/PTGS1/PTGS2/TBXAS1     | 4 |
| GO:2000379 | positive regulation of reactive oxygen species metabolic process                | 3/31 | 106/18866 | 6.91×10 <sup>-4</sup> | 1.02×10 <sup>-2</sup> | 5.29×10 <sup>-3</sup> | HDAC4/PTGS2/TLR4             | 3 |
| GO:0044247 | cellular polysaccharide catabolic process                                       | 2/31 | 24/18866  | 7.05×10 <sup>-4</sup> | 1.02×10 <sup>-2</sup> | 5.29×10 <sup>-3</sup> | GAA/MGAM                     | 2 |
| GO:0098581 | detection of external biotic stimulus                                           | 2/31 | 24/18866  | 7.05×10 <sup>-4</sup> | 1.02×10 <sup>-2</sup> | 5.29×10 <sup>-3</sup> | LY96/TLR4                    | 2 |
| GO:0014897 | striated muscle hypertrophy                                                     | 3/31 | 107/18866 | 7.10×10 <sup>-4</sup> | 1.02×10 <sup>-2</sup> | 5.29×10 <sup>-3</sup> | G6PD/HDAC4/PPP3CA            | 3 |
| GO:0009636 | response to toxic substance                                                     | 4/31 | 250/18866 | 7.15×10 <sup>-4</sup> | 1.02×10 <sup>-2</sup> | 5.29×10 <sup>-3</sup> | LCN2/MPO/PTGS1/PTGS2         | 4 |
| GO:0001819 | positive regulation of cytokine production                                      | 5/31 | 447/18866 | 7.46×10 <sup>-4</sup> | 1.04×10 <sup>-2</sup> | 5.41×10 <sup>-3</sup> | LY96/PTAFR/PTGS2/STAT3/TLR4  | 5 |
| GO:0006939 | smooth muscle contraction                                                       | 3/31 | 109/18866 | 7.50×10 <sup>-4</sup> | 1.04×10 <sup>-2</sup> | 5.41×10 <sup>-3</sup> | ADA/PTAFR/PTGS2              | 3 |
| GO:0014896 | muscle hypertrophy                                                              | 3/31 | 109/18866 | 7.50×10 <sup>-4</sup> | 1.04×10 <sup>-2</sup> | 5.41×10 <sup>-3</sup> | G6PD/HDAC4/PPP3CA            | 3 |
| GO:0070920 | regulation of production of small RNA involved in gene silencing by RNA         | 2/31 | 25/18866  | 7.66×10 <sup>-4</sup> | 1.05×10 <sup>-2</sup> | 5.47×10 <sup>-3</sup> | PPP3CA/STAT3                 | 2 |
| GO:0032680 | regulation of tumor necrosis factor production                                  | 3/31 | 110/18866 | 7.70×10 <sup>-4</sup> | 1.05×10 <sup>-2</sup> | 5.47×10 <sup>-3</sup> | LY96/PTAFR/TLR4              | 3 |
| GO:0008016 | regulation of heart contraction                                                 | 4/31 | 256/18866 | 7.81×10 <sup>-4</sup> | 1.06×10 <sup>-2</sup> | 5.51×10 <sup>-3</sup> | ADA/GAA/HDAC4/PIK3CG         | 4 |
| GO:0002526 | acute inflammatory response                                                     | 3/31 | 111/18866 | 7.90×10 <sup>-4</sup> | 1.06×10 <sup>-2</sup> | 5.53×10 <sup>-3</sup> | PIK3CG/PTGS2/STAT3           | 3 |
| GO:0062012 | regulation of small molecule metabolic process                                  | 3/31 | 456/18866 | 8.16×10 <sup>-4</sup> | 1.09×10 <sup>-2</sup> | 5.65×10 <sup>-3</sup> | HDAC4/HMGR/PTAFR/PTGS2/STAT3 | 5 |
| GO:0000272 | polysaccharide catabolic process                                                | 2/31 | 26/18866  | 8.29×10 <sup>-4</sup> | 1.09×10 <sup>-2</sup> | 5.65×10 <sup>-3</sup> | GAA/MGAM                     | 2 |
| GO:0051156 | glucose 6-phosphate metabolic process                                           | 2/31 | 26/18866  | 8.29×10 <sup>-4</sup> | 1.09×10 <sup>-2</sup> | 5.65×10 <sup>-3</sup> | G6PD/HK2                     | 2 |
| GO:1903555 | regulation of tumor necrosis factor superfamily cytokine production             | 3/31 | 113/18866 | 8.32×10 <sup>-4</sup> | 1.09×10 <sup>-2</sup> | 5.65×10 <sup>-3</sup> | LY96/PTAFR/TLR4              | 3 |
| GO:1990748 | cellular detoxification                                                         | 3/31 | 114/18866 | 8.54×10 <sup>-4</sup> | 1.11×10 <sup>-2</sup> | 5.75×10 <sup>-3</sup> | MPO/PTGS1/PTGS2              | 3 |
| GO:0006096 | glycolytic process                                                              | 3/31 | 115/18866 | 8.76×10 <sup>-4</sup> | 1.13×10 <sup>-2</sup> | 5.85×10 <sup>-3</sup> | HDAC4/HK2/STAT3              | 3 |
| GO:0006757 | ATP generation from ADP                                                         | 3/31 | 116/18866 | 8.98×10 <sup>-4</sup> | 1.13×10 <sup>-2</sup> | 5.89×10 <sup>-3</sup> | HDAC4/HK2/STAT3              | 3 |
| GO:0032640 | tumor necrosis factor production                                                | 3/31 | 116/18866 | 8.98×10 <sup>-4</sup> | 1.13×10 <sup>-2</sup> | 5.89×10 <sup>-3</sup> | LY96/PTAFR/TLR4              | 3 |
| GO:0009165 | nucleotide biosynthetic process                                                 | 4/31 | 266/18866 | 9.01×10 <sup>-4</sup> | 1.13×10 <sup>-2</sup> | 5.89×10 <sup>-3</sup> | ADA/APRT/PTGS2/STAT3         | 4 |

|            |                                                                  |      |           |                       |                       |                       |                              |   |
|------------|------------------------------------------------------------------|------|-----------|-----------------------|-----------------------|-----------------------|------------------------------|---|
| GO:1901293 | nucleoside phosphate biosynthetic process                        | 4/31 | 269/18866 | 9.39×10 <sup>-4</sup> | 1.16×10 <sup>-2</sup> | 6.06×10 <sup>-3</sup> | ADA/APRT/PTGS2/STAT3         | 4 |
| GO:0051091 | positive regulation of DNA-binding transcription factor activity | 4/31 | 270/18866 | 9.52×10 <sup>-4</sup> | 1.16×10 <sup>-2</sup> | 6.06×10 <sup>-3</sup> | HDAC4/PPP3CA/STAT3/TLR4      | 4 |
| GO:0045932 | negative regulation of muscle contraction                        | 2/31 | 28/18866  | 9.62×10 <sup>-4</sup> | 1.16×10 <sup>-2</sup> | 6.06×10 <sup>-3</sup> | PIK3CG/PTGS2                 | 2 |
| GO:1903579 | negative regulation of ATP metabolic process                     | 2/31 | 28/18866  | 9.62×10 <sup>-4</sup> | 1.16×10 <sup>-2</sup> | 6.06×10 <sup>-3</sup> | HDAC4/STAT3                  | 2 |
| GO:0010822 | positive regulation of mitochondrion organization                | 3/31 | 119/18866 | 9.67×10 <sup>-4</sup> | 1.16×10 <sup>-2</sup> | 6.06×10 <sup>-3</sup> | HK2/MMP9/PPP3R1              | 3 |
| GO:0071706 | tumor necrosis factor superfamily cytokine production            | 3/31 | 119/18866 | 9.67×10 <sup>-4</sup> | 1.16×10 <sup>-2</sup> | 6.06×10 <sup>-3</sup> | LY96/PTAFR/TLR4              | 3 |
| GO:0036336 | dendritic cell migration                                         | 2/31 | 29/18866  | 1.03×10 <sup>-3</sup> | 1.22×10 <sup>-2</sup> | 6.33×10 <sup>-3</sup> | ALOX5/PIK3CG                 | 2 |
| GO:0050901 | leukocyte tethering or rolling                                   | 2/31 | 29/18866  | 1.03×10 <sup>-3</sup> | 1.22×10 <sup>-2</sup> | 6.33×10 <sup>-3</sup> | PTAFR/SELL                   | 2 |
| GO:0045471 | response to ethanol                                              | 3/31 | 122/18866 | 1.04×10 <sup>-3</sup> | 1.22×10 <sup>-2</sup> | 6.33×10 <sup>-3</sup> | G6PD/HMGCR/STAT3             | 3 |
| GO:0097237 | cellular response to toxic substance                             | 3/31 | 122/18866 | 1.04×10 <sup>-3</sup> | 1.22×10 <sup>-2</sup> | 6.33×10 <sup>-3</sup> | MPO/PTGS1/PTGS2              | 3 |
| GO:0051051 | negative regulation of transport                                 | 3/31 | 483/18866 | 1.06×10 <sup>-3</sup> | 1.23×10 <sup>-2</sup> | 6.39×10 <sup>-3</sup> | ADA/HMGCR/MMP9/PPP3CA/PTGS2  | 5 |
| GO:0042326 | negative regulation of phosphorylation                           | 3/31 | 484/18866 | 1.07×10 <sup>-3</sup> | 1.23×10 <sup>-2</sup> | 6.41×10 <sup>-3</sup> | DUSP1/HDAC4/HMGCR/STAT3/TLR4 | 5 |
| GO:0046031 | ADP metabolic process                                            | 3/31 | 124/18866 | 1.09×10 <sup>-3</sup> | 1.25×10 <sup>-2</sup> | 6.50×10 <sup>-3</sup> | HDAC4/HK2/STAT3              | 3 |
| GO:0035666 | TRIF-dependent toll-like receptor signaling pathway              | 2/31 | 30/18866  | 1.10×10 <sup>-3</sup> | 1.26×10 <sup>-2</sup> | 6.53×10 <sup>-3</sup> | LY96/TLR4                    | 2 |
| GO:0008637 | apoptotic mitochondrial changes                                  | 3/31 | 125/18866 | 1.11×10 <sup>-3</sup> | 1.26×10 <sup>-2</sup> | 6.53×10 <sup>-3</sup> | HK2/MMP9/PPP3R1              | 3 |
| GO:0043500 | muscle adaptation                                                | 3/31 | 125/18866 | 1.11×10 <sup>-3</sup> | 1.26×10 <sup>-2</sup> | 6.53×10 <sup>-3</sup> | G6PD/HDAC4/PPP3CA            | 3 |
| GO:0002675 | positive regulation of acute inflammatory response               | 2/31 | 31/18866  | 1.18×10 <sup>-3</sup> | 1.29×10 <sup>-2</sup> | 6.73×10 <sup>-3</sup> | PIK3CG/PTGS2                 | 2 |
| GO:0003299 | muscle hypertrophy in response to stress                         | 2/31 | 31/18866  | 1.18×10 <sup>-3</sup> | 1.29×10 <sup>-2</sup> | 6.73×10 <sup>-3</sup> | HDAC4/PPP3CA                 | 2 |
| GO:0014887 | cardiac muscle adaptation                                        | 2/31 | 31/18866  | 1.18×10 <sup>-3</sup> | 1.29×10 <sup>-2</sup> | 6.73×10 <sup>-3</sup> | HDAC4/PPP3CA                 | 2 |
| GO:0014898 | cardiac muscle hypertrophy in response to stress                 | 2/31 | 31/18866  | 1.18×10 <sup>-3</sup> | 1.29×10 <sup>-2</sup> | 6.73×10 <sup>-3</sup> | HDAC4/PPP3CA                 | 2 |
| GO:0060047 | heart contraction                                                | 4/31 | 287/18866 | 1.19×10 <sup>-3</sup> | 1.30×10 <sup>-2</sup> | 6.77×10 <sup>-3</sup> | ADA/GAA/HDAC4/PIK3CG         | 4 |
| GO:0048741 | skeletal muscle fiber development                                | 2/31 | 32/18866  | 1.26×10 <sup>-3</sup> | 1.36×10 <sup>-2</sup> | 7.08×10 <sup>-3</sup> | HDAC4/PPP3CA                 | 2 |
| GO:0006165 | nucleoside diphosphate phosphorylation                           | 3/31 | 133/18866 | 1.33×10 <sup>-3</sup> | 1.43×10 <sup>-2</sup> | 7.44×10 <sup>-3</sup> | HDAC4/HK2/STAT3              | 3 |
| GO:0035590 | purinergic nucleotide receptor signaling pathway                 | 2/31 | 33/18866  | 1.34×10 <sup>-3</sup> | 1.43×10 <sup>-2</sup> | 7.44×10 <sup>-3</sup> | ADA/PTAFR                    | 2 |
| GO:0003015 | heart process                                                    | 4/31 | 297/18866 | 1.35×10 <sup>-3</sup> | 1.43×10 <sup>-2</sup> | 7.44×10 <sup>-3</sup> | ADA/GAA/HDAC4/PIK3CG         | 4 |
| GO:0046939 | nucleotide phosphorylation                                       | 3/31 | 135/18866 | 1.39×10 <sup>-3</sup> | 1.43×10 <sup>-2</sup> | 7.44×10 <sup>-3</sup> | HDAC4/HK2/STAT3              | 3 |
| GO:0002756 | MyD88-independent toll-like receptor signaling pathway           | 2/31 | 34/18866  | 1.42×10 <sup>-3</sup> | 1.43×10 <sup>-2</sup> | 7.44×10 <sup>-3</sup> | LY96/TLR4                    | 2 |
| GO:0009156 | ribonucleoside monophosphate biosynthetic process                | 2/31 | 34/18866  | 1.42×10 <sup>-3</sup> | 1.43×10 <sup>-2</sup> | 7.44×10 <sup>-3</sup> | ADA/APRT                     | 2 |
| GO:0033198 | response to ATP                                                  | 2/31 | 34/18866  | 1.42×10 <sup>-3</sup> | 1.43×10 <sup>-2</sup> | 7.44×10 <sup>-3</sup> | PTGS2/SELL                   | 2 |
| GO:0042759 | long-chain fatty acid biosynthetic process                       | 2/31 | 34/18866  | 1.42×10 <sup>-3</sup> | 1.43×10 <sup>-2</sup> | 7.44×10 <sup>-3</sup> | ALOX5/PTGS2                  | 2 |
| GO:0043094 | cellular metabolic compound salvage                              | 2/31 | 34/18866  | 1.42×10 <sup>-3</sup> | 1.43×10 <sup>-2</sup> | 7.44×10 <sup>-3</sup> | ADA/APRT                     | 2 |
| GO:0045907 | positive regulation of vasoconstriction                          | 2/31 | 34/18866  | 1.42×10 <sup>-3</sup> | 1.43×10 <sup>-2</sup> | 7.44×10 <sup>-3</sup> | PTAFR/PTGS2                  | 2 |
| GO:0009135 | purine nucleoside diphosphate metabolic process                  | 3/31 | 136/18866 | 1.42×10 <sup>-3</sup> | 1.43×10 <sup>-2</sup> | 7.44×10 <sup>-3</sup> | HDAC4/HK2/STAT3              | 3 |
| GO:0009179 | purine ribonucleoside diphosphate metabolic process              | 3/31 | 136/18866 | 1.42×10 <sup>-3</sup> | 1.43×10 <sup>-2</sup> | 7.44×10 <sup>-3</sup> | HDAC4/HK2/STAT3              | 3 |
| GO:0098754 | detoxification                                                   | 3/31 | 138/18866 | 1.48×10 <sup>-3</sup> | 1.48×10 <sup>-2</sup> | 7.72×10 <sup>-3</sup> | MPO/PTGS1/PTGS2              | 3 |
| GO:0009112 | nucleobase metabolic process                                     | 2/31 | 35/18866  | 1.50×10 <sup>-3</sup> | 1.49×10 <sup>-2</sup> | 7.74×10 <sup>-3</sup> | ADA/APRT                     | 2 |
| GO:0014904 | myotube cell development                                         | 2/31 | 35/18866  | 1.50×10 <sup>-3</sup> | 1.49×10 <sup>-2</sup> | 7.74×10 <sup>-3</sup> | HDAC4/PPP3CA                 | 2 |
| GO:0009185 | ribonucleoside diphosphate metabolic process                     | 3/31 | 139/18866 | 1.51×10 <sup>-3</sup> | 1.49×10 <sup>-2</sup> | 7.74×10 <sup>-3</sup> | HDAC4/HK2/STAT3              | 3 |
| GO:0060048 | cardiac muscle contraction                                       | 3/31 | 140/18866 | 1.54×10 <sup>-3</sup> | 1.51×10 <sup>-2</sup> | 7.86×10 <sup>-3</sup> | GAA/HDAC4/PIK3CG             | 3 |
| GO:0032355 | response to estradiol                                            | 3/31 | 141/18866 | 1.58×10 <sup>-3</sup> | 1.51×10 <sup>-2</sup> | 7.87×10 <sup>-3</sup> | DUSP1/PTGS2/STAT3            | 3 |
| GO:0002755 | MyD88-dependent toll-like receptor signaling pathway             | 2/31 | 36/18866  | 1.59×10 <sup>-3</sup> | 1.51×10 <sup>-2</sup> | 7.87×10 <sup>-3</sup> | LY96/TLR4                    | 2 |
| GO:0009595 | detection of biotic stimulus                                     | 2/31 | 36/18866  | 1.59×10 <sup>-3</sup> | 1.51×10 <sup>-2</sup> | 7.87×10 <sup>-3</sup> | LY96/TLR4                    | 2 |
| GO:0033280 | response to vitamin D                                            | 2/31 | 36/18866  | 1.59×10 <sup>-3</sup> | 1.51×10 <sup>-2</sup> | 7.87×10 <sup>-3</sup> | ALPL/PTGS2                   | 2 |
| GO:0046676 | negative regulation of insulin secretion                         | 2/31 | 36/18866  | 1.59×10 <sup>-3</sup> | 1.51×10 <sup>-2</sup> | 7.87×10 <sup>-3</sup> | HMGCR/PPP3CA                 | 2 |
| GO:0007006 | mitochondrial membrane organization                              | 3/31 | 142/18866 | 1.61×10 <sup>-3</sup> | 1.52×10 <sup>-2</sup> | 7.91×10 <sup>-3</sup> | HK2/PPP3R1/STAT3             | 3 |
| GO:0035296 | regulation of tube diameter                                      | 3/31 | 143/18866 | 1.64×10 <sup>-3</sup> | 1.53×10 <sup>-2</sup> | 7.96×10 <sup>-3</sup> | HMGCR/PTAFR/PTGS2            | 3 |
| GO:0097746 | regulation of blood vessel diameter                              | 3/31 | 143/18866 | 1.64×10 <sup>-3</sup> | 1.53×10 <sup>-2</sup> | 7.96×10 <sup>-3</sup> | HMGCR/PTAFR/PTGS2            | 3 |
| GO:0035150 | regulation of tube size                                          | 3/31 | 144/18866 | 1.67×10 <sup>-3</sup> | 1.53×10 <sup>-2</sup> | 7.96×10 <sup>-3</sup> | HMGCR/PTAFR/PTGS2            | 3 |
| GO:0009167 | purine ribonucleoside monophosphate metabolic process            | 2/31 | 37/18866  | 1.68×10 <sup>-3</sup> | 1.53×10 <sup>-2</sup> | 7.96×10 <sup>-3</sup> | ADA/APRT                     | 2 |
| GO:0045730 | respiratory burst                                                | 2/31 | 37/18866  | 1.68×10 <sup>-3</sup> | 1.53×10 <sup>-2</sup> | 7.96×10 <sup>-3</sup> | MPO/PIK3CG                   | 2 |
| GO:0060969 | negative regulation of gene silencing                            | 2/31 | 37/18866  | 1.68×10 <sup>-3</sup> | 1.53×10 <sup>-2</sup> | 7.96×10 <sup>-3</sup> | PPP3CA/STAT3                 | 2 |
| GO:1904994 | regulation of leukocyte adhesion to vascular endothelial cell    | 2/31 | 37/18866  | 1.68×10 <sup>-3</sup> | 1.53×10 <sup>-2</sup> | 7.96×10 <sup>-3</sup> | ALOX5/PTAFR                  | 2 |
| GO:0042542 | response to hydrogen peroxide                                    | 3/31 | 146/18866 | 1.74×10 <sup>-3</sup> | 1.58×10 <sup>-2</sup> | 8.21×10 <sup>-3</sup> | ADA/DUSP1/LCN2               | 3 |
| GO:0007223 | Wnt signaling pathway, calcium modulating pathway                | 2/31 | 38/18866  | 1.77×10 <sup>-3</sup> | 1.58×10 <sup>-2</sup> | 8.22×10 <sup>-3</sup> | PPP3CA/PPP3R1                | 2 |
| GO:0032094 | response to food                                                 | 2/31 | 38/18866  | 1.77×10 <sup>-3</sup> | 1.58×10 <sup>-2</sup> | 8.22×10 <sup>-3</sup> | G6PD/MPO                     | 2 |
| GO:0032733 | positive regulation of interleukin-10 production                 | 2/31 | 38/18866  | 1.77×10 <sup>-3</sup> | 1.58×10 <sup>-2</sup> | 8.22×10 <sup>-3</sup> | STAT3/TLR4                   | 2 |
| GO:1901214 | regulation of neuron death                                       | 4/31 | 321/18866 | 1.80×10 <sup>-3</sup> | 1.60×10 <sup>-2</sup> | 8.32×10 <sup>-3</sup> | G6PD/HDAC4/STAT3/TLR4        | 4 |
| GO:0010675 | regulation of cellular carbohydrate metabolic process            | 3/31 | 148/18866 | 1.81×10 <sup>-3</sup> | 1.60×10 <sup>-2</sup> | 8.32×10 <sup>-3</sup> | HDAC4/PTAFR/STAT3            | 3 |
| GO:0009895 | negative regulation of catabolic process                         | 4/31 | 323/18866 | 1.84×10 <sup>-3</sup> | 1.62×10 <sup>-2</sup> | 8.42×10 <sup>-3</sup> | HDAC4/HMGCR/PIK3CG/STAT3     | 4 |
| GO:0009163 | nucleoside biosynthetic process                                  | 2/31 | 39/18866  | 1.86×10 <sup>-3</sup> | 1.63×10 <sup>-2</sup> | 8.48×10 <sup>-3</sup> | ADA/APRT                     | 2 |
| GO:0006606 | protein import into nucleus                                      | 3/31 | 150/18866 | 1.88×10 <sup>-3</sup> | 1.64×10 <sup>-2</sup> | 8.51×10 <sup>-3</sup> | PPP3CA/PTGS2/STAT3           | 3 |
| GO:0071496 | cellular response to external stimulus                           | 4/31 | 326/18866 | 1.91×10 <sup>-3</sup> | 1.65×10 <sup>-2</sup> | 8.57×10 <sup>-3</sup> | HDAC4/LCN2/PTGS2/TLR4        | 4 |
| GO:0061041 | regulation of wound healing                                      | 3/31 | 151/18866 | 1.92×10 <sup>-3</sup> | 1.65×10 <sup>-2</sup> | 8.57×10 <sup>-3</sup> | ALOX5/HMGCR/TLR4             | 3 |
| GO:0006090 | pyruvate metabolic process                                       | 3/31 | 152/18866 | 1.95×10 <sup>-3</sup> | 1.65×10 <sup>-2</sup> | 8.57×10 <sup>-3</sup> | HDAC4/HK2/STAT3              | 3 |
| GO:0006730 | one-carbon metabolic process                                     | 2/31 | 40/18866  | 1.96×10 <sup>-3</sup> | 1.65×10 <sup>-2</sup> | 8.57×10 <sup>-3</sup> | CA1/CA4                      | 2 |
| GO:0009126 | purine nucleoside monophosphate metabolic process                | 2/31 | 40/18866  | 1.96×10 <sup>-3</sup> | 1.65×10 <sup>-2</sup> | 8.57×10 <sup>-3</sup> | ADA/APRT                     | 2 |
| GO:0034142 | toll-like receptor 4 signaling pathway                           | 2/31 | 40/18866  | 1.96×10 <sup>-3</sup> | 1.65×10 <sup>-2</sup> | 8.57×10 <sup>-3</sup> | LY96/TLR4                    | 2 |
| GO:0043902 | positive regulation of multi-organism process                    | 2/31 | 40/18866  | 1.96×10 <sup>-3</sup> | 1.65×10 <sup>-2</sup> | 8.57×10 <sup>-3</sup> | HDAC4/PTAFR                  | 2 |
| GO:0001678 | cellular glucose homeostasis                                     | 3/31 | 153/18866 | 1.99×10 <sup>-3</sup> | 1.66×10 <sup>-2</sup> | 8.61×10 <sup>-3</sup> | HK2/HMGCR/PPP3CA             | 3 |
| GO:0016202 | regulation of striated muscle tissue development                 | 3/31 | 153/18866 | 1.99×10 <sup>-3</sup> | 1.66×10 <sup>-2</sup> | 8.61×10 <sup>-3</sup> | G6PD/HDAC4/HMGCR             | 3 |
| GO:0071214 | cellular response to abiotic stimulus                            | 4/31 | 331/18866 | 2.01×10 <sup>-3</sup> | 1.66×10 <sup>-2</sup> | 8.63×10 <sup>-3</sup> | HDAC4/PTAFR/PTGS2/TLR4       | 4 |
| GO:0104004 | cellular response to environmental stimulus                      | 4/31 | 331/18866 | 2.01×10 <sup>-3</sup> | 1.66×10 <sup>-2</sup> | 8.63×10 <sup>-3</sup> | HDAC4/PTAFR/PTGS2/TLR4       | 4 |
| GO:0062013 | positive regulation of small molecule metabolic process          | 3/31 | 154/18866 | 2.03×10 <sup>-3</sup> | 1.66×10 <sup>-2</sup> | 8.65×10 <sup>-3</sup> | PTAFR/PTGS2/STAT3            | 3 |
| GO:0007618 | mating                                                           | 2/31 | 41/18866  | 2.06×10 <sup>-3</sup> | 1.67×10 <sup>-2</sup> | 8.69×10 <sup>-3</sup> | ADA/HDAC4                    | 2 |

|            |                                                                |      |           |                       |                       |                       |                          |   |
|------------|----------------------------------------------------------------|------|-----------|-----------------------|-----------------------|-----------------------|--------------------------|---|
| GO:0030890 | positive regulation of B cell proliferation                    | 2/31 | 41/18866  | 2.06×10 <sup>-3</sup> | 1.67×10 <sup>-2</sup> | 8.69×10 <sup>-3</sup> | ADA/TLR4                 | 2 |
| GO:0009132 | nucleoside diphosphate metabolic process                       | 3/31 | 155/18866 | 2.07×10 <sup>-3</sup> | 1.67×10 <sup>-2</sup> | 8.69×10 <sup>-3</sup> | HDAC4/HK2/STAT3          | 3 |
| GO:1901861 | regulation of muscle tissue development                        | 3/31 | 156/18866 | 2.10×10 <sup>-3</sup> | 1.69×10 <sup>-2</sup> | 8.80×10 <sup>-3</sup> | G6PD/HDAC4/HMGCR         | 3 |
| GO:0048634 | regulation of muscle organ development                         | 3/31 | 157/18866 | 2.14×10 <sup>-3</sup> | 1.72×10 <sup>-2</sup> | 8.92×10 <sup>-3</sup> | G6PD/HDAC4/HMGCR         | 3 |
| GO:0090278 | negative regulation of peptide hormone secretion               | 2/31 | 42/18866  | 2.16×10 <sup>-3</sup> | 1.72×10 <sup>-2</sup> | 8.96×10 <sup>-3</sup> | HMGCR/PPP3CA             | 2 |
| GO:0007519 | skeletal muscle tissue development                             | 3/31 | 158/18866 | 2.18×10 <sup>-3</sup> | 1.73×10 <sup>-2</sup> | 9.00×10 <sup>-3</sup> | HDAC4/HMGCR/PPP3CA       | 3 |
| GO:0015701 | bicarbonate transport                                          | 2/31 | 43/18866  | 2.26×10 <sup>-3</sup> | 1.76×10 <sup>-2</sup> | 9.15×10 <sup>-3</sup> | CA1/CA4                  | 2 |
| GO:0051154 | negative regulation of striated muscle cell differentiation    | 2/31 | 43/18866  | 2.26×10 <sup>-3</sup> | 1.76×10 <sup>-2</sup> | 9.15×10 <sup>-3</sup> | G6PD/HDAC4               | 2 |
| GO:0150077 | regulation of neuroinflammatory response                       | 2/31 | 43/18866  | 2.26×10 <sup>-3</sup> | 1.76×10 <sup>-2</sup> | 9.15×10 <sup>-3</sup> | MMP9/PTGS2               | 2 |
| GO:1901659 | glycosyl compound biosynthetic process                         | 2/31 | 43/18866  | 2.26×10 <sup>-3</sup> | 1.76×10 <sup>-2</sup> | 9.15×10 <sup>-3</sup> | ADA/APRT                 | 2 |
| GO:0043405 | regulation of MAP kinase activity                              | 4/31 | 342/18866 | 2.27×10 <sup>-3</sup> | 1.76×10 <sup>-2</sup> | 9.15×10 <sup>-3</sup> | DUSP1/HMGCR/PIK3CG/TLR4  | 4 |
| GO:0048545 | response to steroid hormone                                    | 4/31 | 346/18866 | 2.37×10 <sup>-3</sup> | 1.81×10 <sup>-2</sup> | 9.40×10 <sup>-3</sup> | ALPL/DUSP1/PTAFR/PTGS2   | 4 |
| GO:0009124 | nucleoside monophosphate biosynthetic process                  | 2/31 | 44/18866  | 2.37×10 <sup>-3</sup> | 1.81×10 <sup>-2</sup> | 9.40×10 <sup>-3</sup> | ADA/APRT                 | 2 |
| GO:0033173 | calcineurin-NFAT signaling cascade                             | 2/31 | 44/18866  | 2.37×10 <sup>-3</sup> | 1.81×10 <sup>-2</sup> | 9.40×10 <sup>-3</sup> | PPP3CA/PPP3R1            | 2 |
| GO:0031214 | biomineral tissue development                                  | 3/31 | 163/18866 | 2.38×10 <sup>-3</sup> | 1.81×10 <sup>-2</sup> | 9.40×10 <sup>-3</sup> | ALOX5/ALPL/PTGS2         | 3 |
| GO:0110148 | biomineralization                                              | 3/31 | 163/18866 | 2.38×10 <sup>-3</sup> | 1.81×10 <sup>-2</sup> | 9.40×10 <sup>-3</sup> | ALOX5/ALPL/PTGS2         | 3 |
| GO:0046165 | alcohol biosynthetic process                                   | 3/31 | 164/18866 | 2.42×10 <sup>-3</sup> | 1.83×10 <sup>-2</sup> | 9.53×10 <sup>-3</sup> | G6PD/HMGCR/PTAFR         | 3 |
| GO:0010677 | negative regulation of cellular carbohydrate metabolic process | 2/31 | 45/18866  | 2.48×10 <sup>-3</sup> | 1.84×10 <sup>-2</sup> | 9.56×10 <sup>-3</sup> | HDAC4/STAT3              | 2 |
| GO:0034122 | negative regulation of toll-like receptor signaling pathway    | 2/31 | 45/18866  | 2.48×10 <sup>-3</sup> | 1.84×10 <sup>-2</sup> | 9.56×10 <sup>-3</sup> | LY96/TLR4                | 2 |
| GO:0045429 | positive regulation of nitric oxide biosynthetic process       | 2/31 | 45/18866  | 2.48×10 <sup>-3</sup> | 1.84×10 <sup>-2</sup> | 9.56×10 <sup>-3</sup> | PTGS2/TLR4               | 2 |
| GO:0070266 | necroptotic process                                            | 2/31 | 45/18866  | 2.48×10 <sup>-3</sup> | 1.84×10 <sup>-2</sup> | 9.56×10 <sup>-3</sup> | LY96/TLR4                | 2 |
| GO:0050708 | regulation of protein secretion                                | 4/31 | 352/18866 | 2.52×10 <sup>-3</sup> | 1.86×10 <sup>-2</sup> | 9.68×10 <sup>-3</sup> | ALOX5/HMGCR/PPP3CA/TLR4  | 4 |
| GO:0044275 | cellular carbohydrate catabolic process                        | 2/31 | 46/18866  | 2.59×10 <sup>-3</sup> | 1.90×10 <sup>-2</sup> | 9.85×10 <sup>-3</sup> | GAA/MGAM                 | 2 |
| GO:1904407 | positive regulation of nitric oxide metabolic process          | 2/31 | 46/18866  | 2.59×10 <sup>-3</sup> | 1.90×10 <sup>-2</sup> | 9.85×10 <sup>-3</sup> | PTGS2/TLR4               | 2 |
| GO:0060538 | skeletal muscle organ development                              | 3/31 | 168/18866 | 2.60×10 <sup>-3</sup> | 1.90×10 <sup>-2</sup> | 9.85×10 <sup>-3</sup> | HDAC4/HMGCR/PPP3CA       | 3 |
| GO:0055002 | striated muscle cell development                               | 3/31 | 169/18866 | 2.64×10 <sup>-3</sup> | 1.92×10 <sup>-2</sup> | 9.98×10 <sup>-3</sup> | G6PD/HDAC4/PPP3CA        | 3 |
| GO:0034614 | cellular response to reactive oxygen species                   | 3/31 | 170/18866 | 2.68×10 <sup>-3</sup> | 1.94×10 <sup>-2</sup> | 1.01×10 <sup>-2</sup> | LCN2/MMP9/MPO            | 3 |
| GO:0006953 | acute-phase response                                           | 2/31 | 47/18866  | 2.70×10 <sup>-3</sup> | 1.94×10 <sup>-2</sup> | 1.01×10 <sup>-2</sup> | PTGS2/STAT3              | 2 |
| GO:0001666 | response to hypoxia                                            | 4/31 | 359/18866 | 2.70×10 <sup>-3</sup> | 1.94×10 <sup>-2</sup> | 1.01×10 <sup>-2</sup> | ADA/HK2/PLOD1/PTGS2      | 4 |
| GO:0051170 | import into nucleus                                            | 3/31 | 171/18866 | 2.73×10 <sup>-3</sup> | 1.94×10 <sup>-2</sup> | 1.01×10 <sup>-2</sup> | PPP3CA/PTGS2/STAT3       | 3 |
| GO:0070997 | neuron death                                                   | 4/31 | 360/18866 | 2.73×10 <sup>-3</sup> | 1.94×10 <sup>-2</sup> | 1.01×10 <sup>-2</sup> | G6PD/HDAC4/STAT3/TLR4    | 4 |
| GO:0033628 | regulation of cell adhesion mediated by integrin               | 2/31 | 48/18866  | 2.81×10 <sup>-3</sup> | 1.99×10 <sup>-2</sup> | 1.04×10 <sup>-2</sup> | ADA/PIK3CG               | 2 |
| GO:0007159 | leukocyte cell-cell adhesion                                   | 4/31 | 364/18866 | 2.84×10 <sup>-3</sup> | 2.01×10 <sup>-2</sup> | 1.04×10 <sup>-2</sup> | ADA/ALOX5/PTAFR/SELL     | 4 |
| GO:0046394 | carboxylic acid biosynthetic process                           | 4/31 | 367/18866 | 2.93×10 <sup>-3</sup> | 2.01×10 <sup>-2</sup> | 1.05×10 <sup>-2</sup> | ALOX5/PTGS1/PTGS2/TBXAS1 | 4 |
| GO:0002673 | regulation of acute inflammatory response                      | 2/31 | 49/18866  | 2.93×10 <sup>-3</sup> | 2.01×10 <sup>-2</sup> | 1.05×10 <sup>-2</sup> | PIK3CG/PTGS2             | 2 |
| GO:0002686 | negative regulation of leukocyte migration                     | 2/31 | 49/18866  | 2.93×10 <sup>-3</sup> | 2.01×10 <sup>-2</sup> | 1.05×10 <sup>-2</sup> | ADA/DUSP1                | 2 |
| GO:0007595 | lactation                                                      | 2/31 | 49/18866  | 2.93×10 <sup>-3</sup> | 2.01×10 <sup>-2</sup> | 1.05×10 <sup>-2</sup> | APRT/HK2                 | 2 |
| GO:0035196 | production of miRNAs involved in gene silencing by miRNA       | 2/31 | 49/18866  | 2.93×10 <sup>-3</sup> | 2.01×10 <sup>-2</sup> | 1.05×10 <sup>-2</sup> | PPP3CA/STAT3             | 2 |
| GO:0048641 | regulation of skeletal muscle tissue development               | 2/31 | 49/18866  | 2.93×10 <sup>-3</sup> | 2.01×10 <sup>-2</sup> | 1.05×10 <sup>-2</sup> | HDAC4/HMGCR              | 2 |
| GO:0097720 | calcineurin-mediated signaling                                 | 2/31 | 49/18866  | 2.93×10 <sup>-3</sup> | 2.01×10 <sup>-2</sup> | 1.05×10 <sup>-2</sup> | PPP3CA/PPP3R1            | 2 |
| GO:0016053 | organic acid biosynthetic process                              | 4/31 | 368/18866 | 2.96×10 <sup>-3</sup> | 2.02×10 <sup>-2</sup> | 1.05×10 <sup>-2</sup> | ALOX5/PTGS1/PTGS2/TBXAS1 | 4 |
| GO:0036293 | response to decreased oxygen levels                            | 4/31 | 371/18866 | 3.04×10 <sup>-3</sup> | 2.07×10 <sup>-2</sup> | 1.07×10 <sup>-2</sup> | ADA/HK2/PLOD1/PTGS2      | 4 |
| GO:0097300 | programmed necrotic cell death                                 | 2/31 | 50/18866  | 3.05×10 <sup>-3</sup> | 2.07×10 <sup>-2</sup> | 1.07×10 <sup>-2</sup> | LY96/TLR4                | 2 |
| GO:0006941 | striated muscle contraction                                    | 3/31 | 178/18866 | 3.06×10 <sup>-3</sup> | 2.07×10 <sup>-2</sup> | 1.07×10 <sup>-2</sup> | GAA/HDAC4/PIK3CG         | 3 |
| GO:0009161 | ribonucleoside monophosphate metabolic process                 | 2/31 | 51/18866  | 3.17×10 <sup>-3</sup> | 2.12×10 <sup>-2</sup> | 1.10×10 <sup>-2</sup> | ADA/APRT                 | 2 |
| GO:0045912 | negative regulation of carbohydrate metabolic process          | 2/31 | 51/18866  | 3.17×10 <sup>-3</sup> | 2.12×10 <sup>-2</sup> | 1.10×10 <sup>-2</sup> | HDAC4/STAT3              | 2 |
| GO:1902893 | regulation of pri-miRNA transcription by RNA polymerase II     | 2/31 | 51/18866  | 3.17×10 <sup>-3</sup> | 2.12×10 <sup>-2</sup> | 1.10×10 <sup>-2</sup> | HDAC4/STAT3              | 2 |
| GO:0050796 | regulation of insulin secretion                                | 3/31 | 181/18866 | 3.20×10 <sup>-3</sup> | 2.13×10 <sup>-2</sup> | 1.11×10 <sup>-2</sup> | ALOX5/HMGCR/PPP3CA       | 3 |
| GO:0055001 | muscle cell development                                        | 3/31 | 183/18866 | 3.30×10 <sup>-3</sup> | 2.18×10 <sup>-2</sup> | 1.13×10 <sup>-2</sup> | G6PD/HDAC4/PPP3CA        | 3 |
| GO:1903034 | regulation of response to wounding                             | 3/31 | 183/18866 | 3.30×10 <sup>-3</sup> | 2.18×10 <sup>-2</sup> | 1.13×10 <sup>-2</sup> | ALOX5/HMGCR/TLR4         | 3 |
| GO:0002791 | regulation of peptide secretion                                | 4/31 | 381/18866 | 3.35×10 <sup>-3</sup> | 2.20×10 <sup>-2</sup> | 1.14×10 <sup>-2</sup> | ALOX5/HMGCR/PPP3CA/TLR4  | 4 |
| GO:0009311 | oligosaccharide metabolic process                              | 2/31 | 53/18866  | 3.42×10 <sup>-3</sup> | 2.21×10 <sup>-2</sup> | 1.15×10 <sup>-2</sup> | GAA/MGAM                 | 2 |
| GO:0032731 | positive regulation of interleukin-1 beta production           | 2/31 | 53/18866  | 3.42×10 <sup>-3</sup> | 2.21×10 <sup>-2</sup> | 1.15×10 <sup>-2</sup> | STAT3/TLR4               | 2 |
| GO:0061614 | pri-miRNA transcription by RNA polymerase II                   | 2/31 | 53/18866  | 3.42×10 <sup>-3</sup> | 2.21×10 <sup>-2</sup> | 1.15×10 <sup>-2</sup> | HDAC4/STAT3              | 2 |
| GO:0071320 | cellular response to cAMP                                      | 2/31 | 53/18866  | 3.42×10 <sup>-3</sup> | 2.21×10 <sup>-2</sup> | 1.15×10 <sup>-2</sup> | PIK3CG/PTAFR             | 2 |
| GO:0006066 | alcohol metabolic process                                      | 4/31 | 385/18866 | 3.47×10 <sup>-3</sup> | 2.22×10 <sup>-2</sup> | 1.15×10 <sup>-2</sup> | ALDH2/G6PD/HMGCR/PTAFR   | 4 |
| GO:0031349 | positive regulation of defense response                        | 4/31 | 385/18866 | 3.47×10 <sup>-3</sup> | 2.22×10 <sup>-2</sup> | 1.15×10 <sup>-2</sup> | PIK3CG/PTGS2/STAT3/TLR4  | 4 |
| GO:0002285 | lymphocyte activation involved in immune response              | 3/31 | 187/18866 | 3.51×10 <sup>-3</sup> | 2.22×10 <sup>-2</sup> | 1.15×10 <sup>-2</sup> | ADA/STAT3/TLR4           | 3 |
| GO:0008217 | regulation of blood pressure                                   | 3/31 | 187/18866 | 3.51×10 <sup>-3</sup> | 2.22×10 <sup>-2</sup> | 1.15×10 <sup>-2</sup> | PTAFR/PTGS1/PTGS2        | 3 |
| GO:0043409 | negative regulation of MAPK cascade                            | 3/31 | 187/18866 | 3.51×10 <sup>-3</sup> | 2.22×10 <sup>-2</sup> | 1.15×10 <sup>-2</sup> | DUSP1/HMGCR/TLR4         | 3 |
| GO:0009620 | response to fungus                                             | 2/31 | 54/18866  | 3.55×10 <sup>-3</sup> | 2.22×10 <sup>-2</sup> | 1.15×10 <sup>-2</sup> | MPO/TLR4                 | 2 |
| GO:0031050 | dsRNA processing                                               | 2/31 | 54/18866  | 3.55×10 <sup>-3</sup> | 2.22×10 <sup>-2</sup> | 1.15×10 <sup>-2</sup> | PPP3CA/STAT3             | 2 |
| GO:0032757 | positive regulation of interleukin-8 production                | 2/31 | 54/18866  | 3.55×10 <sup>-3</sup> | 2.22×10 <sup>-2</sup> | 1.15×10 <sup>-2</sup> | STAT3/TLR4               | 2 |
| GO:0070918 | production of small RNA involved in gene silencing by RNA      | 2/31 | 54/18866  | 3.55×10 <sup>-3</sup> | 2.22×10 <sup>-2</sup> | 1.15×10 <sup>-2</sup> | PPP3CA/STAT3             | 2 |
| GO:0014706 | striated muscle tissue development                             | 4/31 | 389/18866 | 3.61×10 <sup>-3</sup> | 2.25×10 <sup>-2</sup> | 1.17×10 <sup>-2</sup> | G6PD/HDAC4/HMGCR/PPP3CA  | 4 |
| GO:0003018 | vascular process in circulatory system                         | 3/31 | 190/18866 | 3.67×10 <sup>-3</sup> | 2.26×10 <sup>-2</sup> | 1.18×10 <sup>-2</sup> | HMGCR/PTAFR/PTGS2        | 3 |
| GO:0051048 | negative regulation of secretion                               | 3/31 | 190/18866 | 3.67×10 <sup>-3</sup> | 2.26×10 <sup>-2</sup> | 1.18×10 <sup>-2</sup> | ADA/HMGCR/PPP3CA         | 3 |
| GO:0001706 | endoderm formation                                             | 2/31 | 55/18866  | 3.68×10 <sup>-3</sup> | 2.26×10 <sup>-2</sup> | 1.18×10 <sup>-2</sup> | DUSP1/MMP9               | 2 |
| GO:0014888 | striated muscle adaptation                                     | 2/31 | 55/18866  | 3.68×10 <sup>-3</sup> | 2.26×10 <sup>-2</sup> | 1.18×10 <sup>-2</sup> | HDAC4/PPP3CA             | 2 |
| GO:0010821 | regulation of mitochondrion organization                       | 3/31 | 191/18866 | 3.73×10 <sup>-3</sup> | 2.29×10 <sup>-2</sup> | 1.19×10 <sup>-2</sup> | HK2/MMP9/PPP3R1          | 3 |
| GO:1904645 | response to amyloid-beta                                       | 2/31 | 56/18866  | 3.81×10 <sup>-3</sup> | 2.33×10 <sup>-2</sup> | 1.21×10 <sup>-2</sup> | MMP9/TLR4                | 2 |
| GO:0006631 | fatty acid metabolic process                                   | 4/31 | 396/18866 | 3.84×10 <sup>-3</sup> | 2.33×10 <sup>-2</sup> | 1.21×10 <sup>-2</sup> | ALOX5/PTGS1/PTGS2/TBXAS1 | 4 |

|            |                                                                 |      |           |                       |                       |                       |                          |   |
|------------|-----------------------------------------------------------------|------|-----------|-----------------------|-----------------------|-----------------------|--------------------------|---|
| GO:0070482 | response to oxygen levels                                       | 4/31 | 396/18866 | 3.84×10 <sup>-3</sup> | 2.33×10 <sup>-2</sup> | 1.21×10 <sup>-2</sup> | ADA/HK2/PLOD1/PTGS2      | 4 |
| GO:0046390 | ribose phosphate biosynthetic process                           | 3/31 | 194/18866 | 3.89×10 <sup>-3</sup> | 2.35×10 <sup>-2</sup> | 1.22×10 <sup>-2</sup> | APRT/G6PD/STAT3          | 3 |
| GO:0042743 | hydrogen peroxide metabolic process                             | 2/31 | 57/18866  | 3.94×10 <sup>-3</sup> | 2.36×10 <sup>-2</sup> | 1.23×10 <sup>-2</sup> | MPO/STAT3                | 2 |
| GO:0046148 | pigment biosynthetic process                                    | 2/31 | 57/18866  | 3.94×10 <sup>-3</sup> | 2.36×10 <sup>-2</sup> | 1.23×10 <sup>-2</sup> | ADA/APRT                 | 2 |
| GO:0048016 | inositol phosphate-mediated signaling                           | 2/31 | 57/18866  | 3.94×10 <sup>-3</sup> | 2.36×10 <sup>-2</sup> | 1.23×10 <sup>-2</sup> | PPP3CA/PPP3R1            | 2 |
| GO:0006164 | purine nucleotide biosynthetic process                          | 3/31 | 197/18866 | 4.06×10 <sup>-3</sup> | 2.41×10 <sup>-2</sup> | 1.25×10 <sup>-2</sup> | ADA/APRT/STAT3           | 3 |
| GO:0007566 | embryo implantation                                             | 2/31 | 58/18866  | 4.08×10 <sup>-3</sup> | 2.41×10 <sup>-2</sup> | 1.25×10 <sup>-2</sup> | MMP9/PTGS2               | 2 |
| GO:0046128 | purine ribonucleoside metabolic process                         | 2/31 | 58/18866  | 4.08×10 <sup>-3</sup> | 2.41×10 <sup>-2</sup> | 1.25×10 <sup>-2</sup> | ADA/APRT                 | 2 |
| GO:0045765 | regulation of angiogenesis                                      | 4/31 | 403/18866 | 4.09×10 <sup>-3</sup> | 2.41×10 <sup>-2</sup> | 1.25×10 <sup>-2</sup> | ALOX5/HK2/PTGS2/STAT3    | 4 |
| GO:0007517 | muscle organ development                                        | 4/31 | 407/18866 | 4.24×10 <sup>-3</sup> | 2.48×10 <sup>-2</sup> | 1.29×10 <sup>-2</sup> | G6PD/HDAC4/HMGCR/PPP3CA  | 4 |
| GO:0017038 | protein import                                                  | 3/31 | 200/18866 | 4.24×10 <sup>-3</sup> | 2.48×10 <sup>-2</sup> | 1.29×10 <sup>-2</sup> | PPP3CA/PTGS2/STAT3       | 3 |
| GO:0060537 | muscle tissue development                                       | 4/31 | 409/18866 | 4.31×10 <sup>-3</sup> | 2.50×10 <sup>-2</sup> | 1.30×10 <sup>-2</sup> | G6PD/HDAC4/HMGCR/PPP3CA  | 4 |
| GO:0019229 | regulation of vasoconstriction                                  | 2/31 | 60/18866  | 4.36×10 <sup>-3</sup> | 2.50×10 <sup>-2</sup> | 1.30×10 <sup>-2</sup> | PTAFR/PTGS2              | 2 |
| GO:0032653 | regulation of interleukin-10 production                         | 2/31 | 60/18866  | 4.36×10 <sup>-3</sup> | 2.50×10 <sup>-2</sup> | 1.30×10 <sup>-2</sup> | STAT3/TLR4               | 2 |
| GO:0032732 | positive regulation of interleukin-1 production                 | 2/31 | 60/18866  | 4.36×10 <sup>-3</sup> | 2.50×10 <sup>-2</sup> | 1.30×10 <sup>-2</sup> | STAT3/TLR4               | 2 |
| GO:0048747 | muscle fiber development                                        | 2/31 | 60/18866  | 4.36×10 <sup>-3</sup> | 2.50×10 <sup>-2</sup> | 1.30×10 <sup>-2</sup> | HDAC4/PPP3CA             | 2 |
| GO:2000242 | negative regulation of reproductive process                     | 2/31 | 60/18866  | 4.36×10 <sup>-3</sup> | 2.50×10 <sup>-2</sup> | 1.30×10 <sup>-2</sup> | ADA/DUSP1                | 2 |
| GO:0009746 | response to hexose                                              | 3/31 | 202/18866 | 4.36×10 <sup>-3</sup> | 2.50×10 <sup>-2</sup> | 1.30×10 <sup>-2</sup> | HMGCR/PPP3CA/PTGS2       | 3 |
| GO:0001503 | ossification                                                    | 4/31 | 412/18866 | 4.42×10 <sup>-3</sup> | 2.52×10 <sup>-2</sup> | 1.31×10 <sup>-2</sup> | ALOX5/ALPL/HDAC4/PTGS2   | 4 |
| GO:0042278 | purine nucleoside metabolic process                             | 2/31 | 61/18866  | 4.50×10 <sup>-3</sup> | 2.55×10 <sup>-2</sup> | 1.33×10 <sup>-2</sup> | ADA/APRT                 | 2 |
| GO:0046888 | negative regulation of hormone secretion                        | 2/31 | 61/18866  | 4.50×10 <sup>-3</sup> | 2.55×10 <sup>-2</sup> | 1.33×10 <sup>-2</sup> | HMGCR/PPP3CA             | 2 |
| GO:0030888 | regulation of B cell proliferation                              | 2/31 | 62/18866  | 4.65×10 <sup>-3</sup> | 2.63×10 <sup>-2</sup> | 1.36×10 <sup>-2</sup> | ADA/TLR4                 | 2 |
| GO:0034284 | response to monosaccharide                                      | 3/31 | 207/18866 | 4.67×10 <sup>-3</sup> | 2.63×10 <sup>-2</sup> | 1.37×10 <sup>-2</sup> | HMGCR/PPP3CA/PTGS2       | 3 |
| GO:0045766 | positive regulation of angiogenesis                             | 3/31 | 208/18866 | 4.73×10 <sup>-3</sup> | 2.65×10 <sup>-2</sup> | 1.38×10 <sup>-2</sup> | HK2/PTGS2/STAT3          | 3 |
| GO:0072522 | purine-containing compound biosynthetic process                 | 3/31 | 208/18866 | 4.73×10 <sup>-3</sup> | 2.65×10 <sup>-2</sup> | 1.38×10 <sup>-2</sup> | ADA/APRT/STAT3           | 3 |
| GO:0032613 | interleukin-10 production                                       | 2/31 | 63/18866  | 4.79×10 <sup>-3</sup> | 2.67×10 <sup>-2</sup> | 1.39×10 <sup>-2</sup> | STAT3/TLR4               | 2 |
| GO:0006109 | regulation of carbohydrate metabolic process                    | 3/31 | 210/18866 | 4.86×10 <sup>-3</sup> | 2.70×10 <sup>-2</sup> | 1.40×10 <sup>-2</sup> | HDAC4/PTAFR/STAT3        | 3 |
| GO:0070265 | necrotic cell death                                             | 2/31 | 64/18866  | 4.94×10 <sup>-3</sup> | 2.74×10 <sup>-2</sup> | 1.42×10 <sup>-2</sup> | LY96/TLR4                | 2 |
| GO:0006816 | calcium ion transport                                           | 4/31 | 426/18866 | 4.98×10 <sup>-3</sup> | 2.75×10 <sup>-2</sup> | 1.43×10 <sup>-2</sup> | G6PD/PIK3CG/PPP3CA/PTGS2 | 4 |
| GO:0002685 | regulation of leukocyte migration                               | 3/31 | 212/18866 | 4.99×10 <sup>-3</sup> | 2.75×10 <sup>-2</sup> | 1.43×10 <sup>-2</sup> | ADA/DUSP1/PTAFR          | 3 |
| GO:0030073 | insulin secretion                                               | 3/31 | 213/18866 | 5.05×10 <sup>-3</sup> | 2.76×10 <sup>-2</sup> | 1.43×10 <sup>-2</sup> | ALOX5/HMGCR/PPP3CA       | 3 |
| GO:0090276 | regulation of peptide hormone secretion                         | 3/31 | 213/18866 | 5.05×10 <sup>-3</sup> | 2.76×10 <sup>-2</sup> | 1.43×10 <sup>-2</sup> | ALOX5/HMGCR/PPP3CA       | 3 |
| GO:0045785 | positive regulation of cell adhesion                            | 4/31 | 428/18866 | 5.06×10 <sup>-3</sup> | 2.76×10 <sup>-2</sup> | 1.43×10 <sup>-2</sup> | ADA/ALOX5/PPP3CA/PTAFR   | 4 |
| GO:0006006 | glucose metabolic process                                       | 3/31 | 214/18866 | 5.12×10 <sup>-3</sup> | 2.78×10 <sup>-2</sup> | 1.45×10 <sup>-2</sup> | G6PD/GAA/HK2             | 3 |
| GO:0030099 | myeloid cell differentiation                                    | 4/31 | 431/18866 | 5.19×10 <sup>-3</sup> | 2.81×10 <sup>-2</sup> | 1.46×10 <sup>-2</sup> | G6PD/MMP9/STAT3/TLR4     | 4 |
| GO:0051651 | maintenance of location in cell                                 | 3/31 | 216/18866 | 5.25×10 <sup>-3</sup> | 2.84×10 <sup>-2</sup> | 1.48×10 <sup>-2</sup> | GAA/HK2/LCN2             | 3 |
| GO:0032102 | negative regulation of response to external stimulus            | 4/31 | 433/18866 | 5.27×10 <sup>-3</sup> | 2.84×10 <sup>-2</sup> | 1.48×10 <sup>-2</sup> | ADA/ALOX5/DUSP1/HMGCR    | 4 |
| GO:0045428 | regulation of nitric oxide biosynthetic process                 | 2/31 | 68/18866  | 5.56×10 <sup>-3</sup> | 2.98×10 <sup>-2</sup> | 1.55×10 <sup>-2</sup> | PTGS2/TLR4               | 2 |
| GO:0051148 | negative regulation of muscle cell differentiation              | 2/31 | 68/18866  | 5.56×10 <sup>-3</sup> | 2.98×10 <sup>-2</sup> | 1.55×10 <sup>-2</sup> | G6PD/HDAC4               | 2 |
| GO:0048732 | gland development                                               | 4/31 | 443/18866 | 5.71×10 <sup>-3</sup> | 3.05×10 <sup>-2</sup> | 1.58×10 <sup>-2</sup> | ADA/APRT/HK2/IGF2R       | 4 |
| GO:1901342 | regulation of vasculature development                           | 4/31 | 444/18866 | 5.76×10 <sup>-3</sup> | 3.06×10 <sup>-2</sup> | 1.59×10 <sup>-2</sup> | ALOX5/HK2/PTGS2/STAT3    | 4 |
| GO:0044706 | multi-multicellular organism process                            | 3/31 | 226/18866 | 5.95×10 <sup>-3</sup> | 3.16×10 <sup>-2</sup> | 1.64×10 <sup>-2</sup> | MMP9/PTAFR/PTGS2         | 3 |
| GO:0033627 | cell adhesion mediated by integrin                              | 2/31 | 71/18866  | 6.05×10 <sup>-3</sup> | 3.20×10 <sup>-2</sup> | 1.66×10 <sup>-2</sup> | ADA/PIK3CG               | 2 |
| GO:0009119 | ribonucleoside metabolic process                                | 2/31 | 72/18866  | 6.22×10 <sup>-3</sup> | 3.26×10 <sup>-2</sup> | 1.69×10 <sup>-2</sup> | ADA/APRT                 | 2 |
| GO:0009123 | nucleoside monophosphate metabolic process                      | 2/31 | 72/18866  | 6.22×10 <sup>-3</sup> | 3.26×10 <sup>-2</sup> | 1.69×10 <sup>-2</sup> | ADA/APRT                 | 2 |
| GO:0042440 | pigment metabolic process                                       | 2/31 | 72/18866  | 6.22×10 <sup>-3</sup> | 3.26×10 <sup>-2</sup> | 1.69×10 <sup>-2</sup> | ADA/APRT                 | 2 |
| GO:0051090 | regulation of DNA-binding transcription factor activity         | 4/31 | 455/18866 | 6.27×10 <sup>-3</sup> | 3.28×10 <sup>-2</sup> | 1.70×10 <sup>-2</sup> | HDAC4/PPP3CA/STAT3/TLR4  | 4 |
| GO:0019932 | second-messenger-mediated signaling                             | 4/31 | 456/18866 | 6.32×10 <sup>-3</sup> | 3.29×10 <sup>-2</sup> | 1.71×10 <sup>-2</sup> | ADA/HDAC4/PPP3CA/PPP3R1  | 4 |
| GO:0010611 | regulation of cardiac muscle hypertrophy                        | 2/31 | 73/18866  | 6.39×10 <sup>-3</sup> | 3.31×10 <sup>-2</sup> | 1.72×10 <sup>-2</sup> | G6PD/PPP3CA              | 2 |
| GO:0030595 | leukocyte chemotaxis                                            | 3/31 | 232/18866 | 6.40×10 <sup>-3</sup> | 3.31×10 <sup>-2</sup> | 1.72×10 <sup>-2</sup> | ALOX5/DUSP1/PIK3CG       | 3 |
| GO:0009743 | response to carbohydrate                                        | 3/31 | 233/18866 | 6.48×10 <sup>-3</sup> | 3.34×10 <sup>-2</sup> | 1.74×10 <sup>-2</sup> | HMGCR/PPP3CA/PTGS2       | 3 |
| GO:0097305 | response to alcohol                                             | 3/31 | 234/18866 | 6.55×10 <sup>-3</sup> | 3.34×10 <sup>-2</sup> | 1.74×10 <sup>-2</sup> | G6PD/HMGCR/STAT3         | 3 |
| GO:0006073 | cellular glucan metabolic process                               | 2/31 | 74/18866  | 6.56×10 <sup>-3</sup> | 3.34×10 <sup>-2</sup> | 1.74×10 <sup>-2</sup> | GAA/MGAM                 | 2 |
| GO:0034121 | regulation of toll-like receptor signaling pathway              | 2/31 | 74/18866  | 6.56×10 <sup>-3</sup> | 3.34×10 <sup>-2</sup> | 1.74×10 <sup>-2</sup> | LY96/TLR4                | 2 |
| GO:0044042 | glucan metabolic process                                        | 2/31 | 74/18866  | 6.56×10 <sup>-3</sup> | 3.34×10 <sup>-2</sup> | 1.74×10 <sup>-2</sup> | GAA/MGAM                 | 2 |
| GO:0009306 | protein secretion                                               | 4/31 | 462/18866 | 6.62×10 <sup>-3</sup> | 3.35×10 <sup>-2</sup> | 1.74×10 <sup>-2</sup> | ALOX5/HMGCR/PPP3CA/TLR4  | 4 |
| GO:1903039 | positive regulation of leukocyte cell-cell adhesion             | 3/31 | 235/18866 | 6.63×10 <sup>-3</sup> | 3.35×10 <sup>-2</sup> | 1.74×10 <sup>-2</sup> | ADA/ALOX5/PTAFR          | 3 |
| GO:1904018 | positive regulation of vasculature development                  | 3/31 | 235/18866 | 6.63×10 <sup>-3</sup> | 3.35×10 <sup>-2</sup> | 1.74×10 <sup>-2</sup> | HK2/PTGS2/STAT3          | 3 |
| GO:0035592 | establishment of protein localization to extracellular region   | 4/31 | 463/18866 | 6.67×10 <sup>-3</sup> | 3.36×10 <sup>-2</sup> | 1.75×10 <sup>-2</sup> | ALOX5/HMGCR/PPP3CA/TLR4  | 4 |
| GO:0006695 | cholesterol biosynthetic process                                | 2/31 | 75/18866  | 6.73×10 <sup>-3</sup> | 3.37×10 <sup>-2</sup> | 1.75×10 <sup>-2</sup> | G6PD/HMGCR               | 2 |
| GO:1902653 | secondary alcohol biosynthetic process                          | 2/31 | 75/18866  | 6.73×10 <sup>-3</sup> | 3.37×10 <sup>-2</sup> | 1.75×10 <sup>-2</sup> | G6PD/HMGCR               | 2 |
| GO:0032872 | regulation of stress-activated MAPK cascade                     | 3/31 | 237/18866 | 6.79×10 <sup>-3</sup> | 3.39×10 <sup>-2</sup> | 1.76×10 <sup>-2</sup> | DUSP1/HMGCR/TLR4         | 3 |
| GO:0014743 | regulation of muscle hypertrophy                                | 2/31 | 76/18866  | 6.90×10 <sup>-3</sup> | 3.44×10 <sup>-2</sup> | 1.79×10 <sup>-2</sup> | G6PD/PPP3CA              | 2 |
| GO:0071692 | protein localization to extracellular region                    | 4/31 | 470/18866 | 7.02×10 <sup>-3</sup> | 3.48×10 <sup>-2</sup> | 1.81×10 <sup>-2</sup> | ALOX5/HMGCR/PPP3CA/TLR4  | 4 |
| GO:0070302 | regulation of stress-activated protein kinase signaling cascade | 3/31 | 240/18866 | 7.03×10 <sup>-3</sup> | 3.48×10 <sup>-2</sup> | 1.81×10 <sup>-2</sup> | DUSP1/HMGCR/TLR4         | 3 |
| GO:0070838 | divalent metal ion transport                                    | 4/31 | 471/18866 | 7.08×10 <sup>-3</sup> | 3.49×10 <sup>-2</sup> | 1.81×10 <sup>-2</sup> | G6PD/PIK3CG/PPP3CA/PTGS2 | 4 |
| GO:0150076 | neuroinflammatory response                                      | 2/31 | 77/18866  | 7.08×10 <sup>-3</sup> | 3.49×10 <sup>-2</sup> | 1.81×10 <sup>-2</sup> | MMP9/PTGS2               | 2 |
| GO:0042310 | vasoconstriction                                                | 2/31 | 78/18866  | 7.26×10 <sup>-3</sup> | 3.55×10 <sup>-2</sup> | 1.85×10 <sup>-2</sup> | PTAFR/PTGS2              | 2 |
| GO:0061045 | negative regulation of wound healing                            | 2/31 | 78/18866  | 7.26×10 <sup>-3</sup> | 3.55×10 <sup>-2</sup> | 1.85×10 <sup>-2</sup> | ALOX5/HMGCR              | 2 |
| GO:0006809 | nitric oxide biosynthetic process                               | 2/31 | 79/18866  | 7.44×10 <sup>-3</sup> | 3.59×10 <sup>-2</sup> | 1.87×10 <sup>-2</sup> | PTGS2/TLR4               | 2 |
| GO:0007492 | endoderm development                                            | 2/31 | 79/18866  | 7.44×10 <sup>-3</sup> | 3.59×10 <sup>-2</sup> | 1.87×10 <sup>-2</sup> | DUSP1/MMP9               | 2 |
| GO:0043407 | negative regulation of MAP kinase activity                      | 2/31 | 79/18866  | 7.44×10 <sup>-3</sup> | 3.59×10 <sup>-2</sup> | 1.87×10 <sup>-2</sup> | DUSP1/HMGCR              | 2 |
| GO:0070373 | negative regulation of ERK1 and ERK2 cascade                    | 2/31 | 79/18866  | 7.44×10 <sup>-3</sup> | 3.59×10 <sup>-2</sup> | 1.87×10 <sup>-2</sup> | DUSP1/TLR4               | 2 |
| GO:0072511 | divalent inorganic cation transport                             | 4/31 | 478/18866 | 7.45×10 <sup>-3</sup> | 3.59×10 <sup>-2</sup> | 1.87×10 <sup>-2</sup> | G6PD/PIK3CG/PPP3CA/PTGS2 | 4 |
| GO:0002312 | B cell activation involved in immune response                   | 2/31 | 80/18866  | 7.62×10 <sup>-3</sup> | 3.66×10 <sup>-2</sup> | 1.90×10 <sup>-2</sup> | ADA/TLR4                 | 2 |

|                       |                                                                                                               |           |           |                       |                       |                       |                                           |       |
|-----------------------|---------------------------------------------------------------------------------------------------------------|-----------|-----------|-----------------------|-----------------------|-----------------------|-------------------------------------------|-------|
| GO:0006110            | regulation of glycolytic process                                                                              | 2/31      | 80/18866  | 7.62×10 <sup>-3</sup> | 3.66×10 <sup>-2</sup> | 1.90×10 <sup>-2</sup> | HDAC4/STAT3                               | 2     |
| GO:0042110            | T cell activation                                                                                             | 4/31      | 483/18866 | 7.72×10 <sup>-3</sup> | 3.70×10 <sup>-2</sup> | 1.92×10 <sup>-2</sup> | ADA/PIK3CG/PPP3CA/STAT3                   | 4     |
| GO:0016126            | sterol biosynthetic process                                                                                   | 2/31      | 81/18866  | 7.81×10 <sup>-3</sup> | 3.73×10 <sup>-2</sup> | 1.94×10 <sup>-2</sup> | G6PD/HMGCR                                | 2     |
| GO:1902930            | regulation of alcohol biosynthetic process                                                                    | 2/31      | 82/18866  | 8.00×10 <sup>-3</sup> | 3.81×10 <sup>-2</sup> | 1.98×10 <sup>-2</sup> | HMGCR/PTAFR                               | 2     |
| GO:0034765            | regulation of ion transmembrane transport                                                                     | 4/31      | 489/18866 | 8.06×10 <sup>-3</sup> | 3.82×10 <sup>-2</sup> | 1.99×10 <sup>-2</sup> | G6PD/MMP9/PIK3CG/PTAFR                    | 4     |
| GO:0051924            | regulation of calcium ion transport                                                                           | 3/31      | 253/18866 | 8.12×10 <sup>-3</sup> | 3.84×10 <sup>-2</sup> | 2.00×10 <sup>-2</sup> | G6PD/PIK3CG/PTGS2                         | 3     |
| GO:0048708            | astrocyte differentiation                                                                                     | 2/31      | 83/18866  | 8.19×10 <sup>-3</sup> | 3.84×10 <sup>-2</sup> | 2.00×10 <sup>-2</sup> | STAT3/TLR4                                | 2     |
| GO:0055117            | regulation of cardiac muscle contraction                                                                      | 2/31      | 83/18866  | 8.19×10 <sup>-3</sup> | 3.84×10 <sup>-2</sup> | 2.00×10 <sup>-2</sup> | HDAC4/PIK3CG                              | 2     |
| GO:2000243            | positive regulation of reproductive process                                                                   | 2/31      | 83/18866  | 8.19×10 <sup>-3</sup> | 3.84×10 <sup>-2</sup> | 2.00×10 <sup>-2</sup> | HDAC4/PTAFR                               | 2     |
| GO:0019318            | hexose metabolic process                                                                                      | 3/31      | 254/18866 | 8.21×10 <sup>-3</sup> | 3.84×10 <sup>-2</sup> | 2.00×10 <sup>-2</sup> | G6PD/GAA/HK2                              | 3     |
| GO:0016311            | dephosphorylation                                                                                             | 4/31      | 492/18866 | 8.23×10 <sup>-3</sup> | 3.84×10 <sup>-2</sup> | 2.00×10 <sup>-2</sup> | ALPL/DUSP1/PPP3CA/PPP3R1                  | 4     |
| GO:0046209            | nitric oxide metabolic process                                                                                | 2/31      | 84/18866  | 8.38×10 <sup>-3</sup> | 3.89×10 <sup>-2</sup> | 2.02×10 <sup>-2</sup> | PTGS2/TLR4                                | 2     |
| GO:0048872            | homeostasis of number of cells                                                                                | 3/31      | 256/18866 | 8.39×10 <sup>-3</sup> | 3.89×10 <sup>-2</sup> | 2.02×10 <sup>-2</sup> | ADA/G6PD/STAT3                            | 3     |
| GO:0030072            | peptide hormone secretion                                                                                     | 3/31      | 257/18866 | 8.47×10 <sup>-3</sup> | 3.93×10 <sup>-2</sup> | 2.04×10 <sup>-2</sup> | ALOX5/HMGCR/PPP3CA                        | 3     |
| GO:1901617            | organic hydroxy compound biosynthetic process                                                                 | 3/31      | 258/18866 | 8.57×10 <sup>-3</sup> | 3.95×10 <sup>-2</sup> | 2.05×10 <sup>-2</sup> | G6PD/HMGCR/PTAFR                          | 3     |
| GO:0043154            | negative regulation of cysteine-type endopeptidase activity involved in apoptotic process                     | 2/31      | 85/18866  | 8.57×10 <sup>-3</sup> | 3.95×10 <sup>-2</sup> | 2.05×10 <sup>-2</sup> | MMP9/PTGS2                                | 2     |
| GO:0009144            | purine nucleoside triphosphate metabolic process                                                              | 2/31      | 87/18866  | 8.96×10 <sup>-3</sup> | 4.11×10 <sup>-2</sup> | 2.14×10 <sup>-2</sup> | ADA/STAT3                                 | 2     |
| GO:2001057            | reactive nitrogen species metabolic process                                                                   | 2/31      | 87/18866  | 8.96×10 <sup>-3</sup> | 4.11×10 <sup>-2</sup> | 2.14×10 <sup>-2</sup> | PTGS2/TLR4                                | 2     |
| GO:0032755            | positive regulation of interleukin-6 production                                                               | 2/31      | 88/18866  | 9.16×10 <sup>-3</sup> | 4.19×10 <sup>-2</sup> | 2.18×10 <sup>-2</sup> | STAT3/TLR4                                | 2     |
| GO:0046883            | regulation of hormone secretion                                                                               | 3/31      | 267/18866 | 9.40×10 <sup>-3</sup> | 4.29×10 <sup>-2</sup> | 2.23×10 <sup>-2</sup> | ALOX5/HMGCR/PPP3CA                        | 3     |
| GO:0043470            | regulation of carbohydrate catabolic process                                                                  | 2/31      | 90/18866  | 9.57×10 <sup>-3</sup> | 4.34×10 <sup>-2</sup> | 2.25×10 <sup>-2</sup> | HDAC4/STAT3                               | 2     |
| GO:0070542            | response to fatty acid                                                                                        | 2/31      | 90/18866  | 9.57×10 <sup>-3</sup> | 4.34×10 <sup>-2</sup> | 2.25×10 <sup>-2</sup> | PTAFR/PTGS2                               | 2     |
| GO:0006839            | mitochondrial transport                                                                                       | 3/31      | 271/18866 | 9.79×10 <sup>-3</sup> | 4.43×10 <sup>-2</sup> | 2.30×10 <sup>-2</sup> | HK2/PPP3R1/STAT3                          | 3     |
| GO:1900407            | regulation of cellular response to oxidative stress                                                           | 2/31      | 92/18866  | 9.98×10 <sup>-3</sup> | 4.50×10 <sup>-2</sup> | 2.34×10 <sup>-2</sup> | ALOX5/TLR4                                | 2     |
| GO:0032677            | regulation of interleukin-8 production                                                                        | 2/31      | 93/18866  | 1.02×10 <sup>-2</sup> | 4.56×10 <sup>-2</sup> | 2.37×10 <sup>-2</sup> | STAT3/TLR4                                | 2     |
| GO:1903035            | negative regulation of response to wounding                                                                   | 2/31      | 93/18866  | 1.02×10 <sup>-2</sup> | 4.56×10 <sup>-2</sup> | 2.37×10 <sup>-2</sup> | ALOX5/HMGCR                               | 2     |
| GO:2000117            | negative regulation of cysteine-type endopeptidase activity                                                   | 2/31      | 93/18866  | 1.02×10 <sup>-2</sup> | 4.56×10 <sup>-2</sup> | 2.37×10 <sup>-2</sup> | MMP9/PTGS2                                | 2     |
| GO:0034504            | protein localization to nucleus                                                                               | 3/31      | 277/18866 | 1.04×10 <sup>-2</sup> | 4.64×10 <sup>-2</sup> | 2.41×10 <sup>-2</sup> | PPP3CA/PTGS2/STAT3                        | 3     |
| GO:0022409            | positive regulation of cell-cell adhesion                                                                     | 3/31      | 279/18866 | 1.06×10 <sup>-2</sup> | 4.71×10 <sup>-2</sup> | 2.45×10 <sup>-2</sup> | ADA/ALOX5/PTAFR                           | 3     |
| GO:0050709            | negative regulation of protein secretion                                                                      | 2/31      | 95/18866  | 1.06×10 <sup>-2</sup> | 4.71×10 <sup>-2</sup> | 2.45×10 <sup>-2</sup> | HMGCR/PPP3CA                              | 2     |
| GO:0046651            | lymphocyte proliferation                                                                                      | 3/31      | 283/18866 | 1.10×10 <sup>-2</sup> | 4.85×10 <sup>-2</sup> | 2.52×10 <sup>-2</sup> | ADA/PIK3CG/TLR4                           | 3     |
| GO:0032651            | regulation of interleukin-1 beta production                                                                   | 2/31      | 97/18866  | 1.10×10 <sup>-2</sup> | 4.85×10 <sup>-2</sup> | 2.52×10 <sup>-2</sup> | STAT3/TLR4                                | 2     |
| GO:0042100            | B cell proliferation                                                                                          | 2/31      | 97/18866  | 1.10×10 <sup>-2</sup> | 4.85×10 <sup>-2</sup> | 2.52×10 <sup>-2</sup> | ADA/TLR4                                  | 2     |
| GO:1901216            | positive regulation of neuron death                                                                           | 2/31      | 97/18866  | 1.10×10 <sup>-2</sup> | 4.85×10 <sup>-2</sup> | 2.52×10 <sup>-2</sup> | HDAC4/TLR4                                | 2     |
| GO:0006942            | regulation of striated muscle contraction                                                                     | 2/31      | 98/18866  | 1.13×10 <sup>-2</sup> | 4.92×10 <sup>-2</sup> | 2.56×10 <sup>-2</sup> | HDAC4/PIK3CG                              | 2     |
| GO:2001243            | negative regulation of intrinsic apoptotic signaling pathway                                                  | 2/31      | 98/18866  | 1.13×10 <sup>-2</sup> | 4.92×10 <sup>-2</sup> | 2.56×10 <sup>-2</sup> | MMP9/PTGS2                                | 2     |
| GO:0032943            | mononuclear cell proliferation                                                                                | 3/31      | 286/18866 | 1.13×10 <sup>-2</sup> | 4.93×10 <sup>-2</sup> | 2.56×10 <sup>-2</sup> | ADA/PIK3CG/TLR4                           | 3     |
| GO:0051403            | stress-activated MAPK cascade                                                                                 | 3/31      | 286/18866 | 1.13×10 <sup>-2</sup> | 4.93×10 <sup>-2</sup> | 2.56×10 <sup>-2</sup> | DUSP1/HMGCR/TLR4                          | 3     |
| GO:0062207            | regulation of pattern recognition receptor signaling pathway                                                  | 2/31      | 99/18866  | 1.15×10 <sup>-2</sup> | 4.98×10 <sup>-2</sup> | 2.59×10 <sup>-2</sup> | LY96/TLR4                                 | 2     |
| B, Cellular component |                                                                                                               |           |           |                       |                       |                       |                                           |       |
| ID                    | Description                                                                                                   | GeneRatio | BgRatio   | P-value               | Adjusted P-value      | q-value               | GeneID                                    | Count |
| GO:0030667            | secretory granule membrane                                                                                    | 6/32      | 306/19559 | 8.98×10 <sup>-6</sup> | 1.14×10 <sup>-3</sup> | 8.6×10 <sup>-4</sup>  | CA4/GAA/IGF2R/MGAM/PTAFR/SELL             | 6     |
| GO:0005641            | nuclear envelope lumen                                                                                        | 2/32      | 10/19559  | 1.16×10 <sup>-4</sup> | 4.54×10 <sup>-3</sup> | 3.42×10 <sup>-3</sup> | ALOX5/IGF2R                               | 2     |
| GO:0070820            | tertiary granule                                                                                              | 4/32      | 164/19559 | 1.43×10 <sup>-4</sup> | 4.54×10 <sup>-3</sup> | 3.42×10 <sup>-3</sup> | GAA/MGAM/MMP9/PTAFR                       | 4     |
| GO:0060205            | cytoplasmic vesicle lumen                                                                                     | 5/32      | 326/19559 | 1.74×10 <sup>-4</sup> | 4.54×10 <sup>-3</sup> | 3.42×10 <sup>-3</sup> | ADA/ALOX5/APRT/LCN2/MPO                   | 5     |
| GO:0031983            | vesicle lumen                                                                                                 | 5/32      | 328/19559 | 1.79×10 <sup>-4</sup> | 4.54×10 <sup>-3</sup> | 3.42×10 <sup>-3</sup> | ADA/ALOX5/APRT/LCN2/MPO                   | 5     |
| GO:0070821            | tertiary granule membrane                                                                                     | 3/32      | 73/19559  | 2.29×10 <sup>-4</sup> | 4.84×10 <sup>-3</sup> | 3.65×10 <sup>-3</sup> | GAA/MGAM/PTAFR                            | 3     |
| GO:0034774            | secretory granule lumen                                                                                       | 4/32      | 322/19559 | 1.80×10 <sup>-3</sup> | 3.27×10 <sup>-2</sup> | 2.47×10 <sup>-2</sup> | ALOX5/APRT/LCN2/MPO                       | 4     |
| GO:0008287            | protein serine/threonine phosphatase complex                                                                  | 2/32      | 51/19559  | 3.15×10 <sup>-3</sup> | 4.44×10 <sup>-2</sup> | 3.35×10 <sup>-2</sup> | PPP3CA/PPP3R1                             | 2     |
| GO:1903293            | phosphatase complex                                                                                           | 2/32      | 51/19559  | 3.15×10 <sup>-3</sup> | 4.44×10 <sup>-2</sup> | 3.35×10 <sup>-2</sup> | PPP3CA/PPP3R1                             | 2     |
| C, Molecular function |                                                                                                               |           |           |                       |                       |                       |                                           |       |
| ID                    | Description                                                                                                   | GeneRatio | BgRatio   | P-value               | Adjusted P-value      | q-value               | GeneID                                    | Count |
| GO:0030246            | carbohydrate binding                                                                                          | 8/32      | 267/18352 | 1.41×10 <sup>-8</sup> | 2.21×10 <sup>-6</sup> | 1.09×10 <sup>-6</sup> | G6PD/GAA/HK2/IGF2R/LGALS2/MGAM/PLOD1/SELL | 8     |
| GO:0048029            | monosaccharide binding                                                                                        | 4/32      | 69/18352  | 6.08×10 <sup>-6</sup> | 4.36×10 <sup>-4</sup> | 2.16×10 <sup>-4</sup> | G6PD/HK2/IGF2R/PLOD1                      | 4     |
| GO:0038187            | pattern recognition receptor activity                                                                         | 3/32      | 23/18352  | 8.33×10 <sup>-6</sup> | 4.36×10 <sup>-4</sup> | 2.16×10 <sup>-4</sup> | LY96/PTAFR/TLR4                           | 3     |
| GO:0051213            | dioxygenase activity                                                                                          | 4/32      | 91/18352  | 1.83×10 <sup>-5</sup> | 7.18×10 <sup>-4</sup> | 3.56×10 <sup>-4</sup> | ALOX5/PLOD1/PTGS1/PTGS2                   | 4     |
| GO:0001530            | lipopolysaccharide binding                                                                                    | 3/32      | 33/18352  | 2.54×10 <sup>-5</sup> | 7.96×10 <sup>-4</sup> | 3.95×10 <sup>-4</sup> | LY96/PTAFR/TLR4                           | 3     |
| GO:0020037            | heme binding                                                                                                  | 4/32      | 138/18352 | 9.35×10 <sup>-5</sup> | 2.08×10 <sup>-3</sup> | 1.03×10 <sup>-3</sup> | MPO/PTGS1/PTGS2/TBXAS1                    | 4     |
| GO:0004601            | peroxidase activity                                                                                           | 3/32      | 52/18352  | 1.00×10 <sup>-4</sup> | 2.08×10 <sup>-3</sup> | 1.03×10 <sup>-3</sup> | MPO/PTGS1/PTGS2                           | 3     |
| GO:0046906            | tetrapyrrole binding                                                                                          | 4/32      | 148/18352 | 1.23×10 <sup>-4</sup> | 2.08×10 <sup>-3</sup> | 1.03×10 <sup>-3</sup> | MPO/PTGS1/PTGS2/TBXAS1                    | 4     |
| GO:0016684            | oxidoreductase activity, acting on peroxide as acceptor                                                       | 3/32      | 56/18352  | 1.25×10 <sup>-4</sup> | 2.08×10 <sup>-3</sup> | 1.03×10 <sup>-3</sup> | MPO/PTGS1/PTGS2                           | 3     |
| GO:0005506            | iron ion binding                                                                                              | 4/32      | 151/18352 | 1.32×10 <sup>-4</sup> | 2.08×10 <sup>-3</sup> | 1.03×10 <sup>-3</sup> | ALOX5/LCN2/PLOD1/TBXAS1                   | 4     |
| GO:0005536            | glucose binding                                                                                               | 2/32      | 11/18352  | 1.60×10 <sup>-4</sup> | 2.27×10 <sup>-3</sup> | 1.13×10 <sup>-3</sup> | G6PD/HK2                                  | 2     |
| GO:0016705            | oxidoreductase activity, acting on paired donors, with incorporation or reduction of molecular oxygen         | 4/32      | 162/18352 | 1.74×10 <sup>-4</sup> | 2.27×10 <sup>-3</sup> | 1.13×10 <sup>-3</sup> | PLOD1/PTGS1/PTGS2/TBXAS1                  | 4     |
| GO:0015926            | glucosidase activity                                                                                          | 2/32      | 14/18352  | 2.65×10 <sup>-4</sup> | 3.19×10 <sup>-3</sup> | 1.58×10 <sup>-3</sup> | GAA/MGAM                                  | 2     |
| GO:0004722            | protein serine/threonine phosphatase activity                                                                 | 3/32      | 75/18352  | 2.99×10 <sup>-4</sup> | 3.19×10 <sup>-3</sup> | 1.58×10 <sup>-3</sup> | DUSP1/PPP3CA/PPP3R1                       | 3     |
| GO:0004089            | carbonate dehydratase activity                                                                                | 2/32      | 15/18352  | 3.05×10 <sup>-4</sup> | 3.19×10 <sup>-3</sup> | 1.58×10 <sup>-3</sup> | CA1/CA4                                   | 2     |
| GO:0042578            | phosphoric ester hydrolase activity                                                                           | 5/32      | 369/18352 | 4.12×10 <sup>-4</sup> | 4.04×10 <sup>-3</sup> | 2.01×10 <sup>-3</sup> | ALPL/DUSP1/PPP3CA/PPP3R1/TDP1             | 5     |
| GO:0016209            | antioxidant activity                                                                                          | 3/32      | 86/18352  | 4.47×10 <sup>-4</sup> | 4.13×10 <sup>-3</sup> | 2.05×10 <sup>-3</sup> | MPO/PTGS1/PTGS2                           | 3     |
| GO:0016018            | cyclosporin A binding                                                                                         | 2/32      | 20/18352  | 5.49×10 <sup>-4</sup> | 4.79×10 <sup>-3</sup> | 2.37×10 <sup>-3</sup> | PPP3CA/PPP3R1                             | 2     |
| GO:0008144            | drug binding                                                                                                  | 3/32      | 104/18352 | 7.78×10 <sup>-4</sup> | 6.43×10 <sup>-3</sup> | 3.19×10 <sup>-3</sup> | LCN2/PPP3CA/PPP3R1                        | 3     |
| GO:0016702            | oxidoreductase activity, acting on single donors with incorporation of molecular oxygen, incorporation of two | 2/32      | 25/18352  | 8.62×10 <sup>-4</sup> | 6.77×10 <sup>-3</sup> | 3.36×10 <sup>-3</sup> | ALOX5/PTGS2                               | 2     |

|            |                                                                                         |      |           |                      |                      |                      |                          |   |
|------------|-----------------------------------------------------------------------------------------|------|-----------|----------------------|----------------------|----------------------|--------------------------|---|
|            | atoms of oxygen                                                                         |      |           |                      |                      |                      |                          |   |
| GO:0016701 | oxidoreductase activity, acting on single donors with incorporation of molecular oxygen | 2/32 | 26/18352  | $9.33\times 10^{-4}$ | $6.97\times 10^{-3}$ | $3.46\times 10^{-3}$ | ALOX5/PTGS2              | 2 |
| GO:0016791 | phosphatase activity                                                                    | 4/32 | 277/18352 | $1.31\times 10^{-3}$ | $9.34\times 10^{-3}$ | $4.64\times 10^{-3}$ | ALPL/DUSP1/PPP3CA/PPP3R1 | 4 |
| GO:0051019 | mitogen-activated protein kinase binding                                                | 2/32 | 33/18352  | $1.50\times 10^{-3}$ | $1.03\times 10^{-2}$ | $5.09\times 10^{-3}$ | DUSP1/PTAFR              | 2 |
| GO:0016798 | hydrolase activity, acting on glycosyl bonds                                            | 3/32 | 133/18352 | $1.58\times 10^{-3}$ | $1.04\times 10^{-2}$ | $5.14\times 10^{-3}$ | GAA/MGAM/TLR4            | 3 |
| GO:0004721 | phosphoprotein phosphatase activity                                                     | 3/32 | 179/18352 | $3.68\times 10^{-3}$ | $2.31\times 10^{-2}$ | $1.15\times 10^{-2}$ | DUSP1/PPP3CA/PPP3R1      | 3 |
| GO:0050661 | NADP binding                                                                            | 2/32 | 54/18352  | $3.98\times 10^{-3}$ | $2.41\times 10^{-2}$ | $1.19\times 10^{-2}$ | G6PD/HMGCR               | 2 |
| GO:0019902 | phosphatase binding                                                                     | 3/32 | 194/18352 | $4.60\times 10^{-3}$ | $2.66\times 10^{-2}$ | $1.32\times 10^{-2}$ | HMGCR/PPP3R1/STAT3       | 3 |
| GO:0016836 | hydro-lyase activity                                                                    | 2/32 | 59/18352  | $4.74\times 10^{-3}$ | $2.66\times 10^{-2}$ | $1.32\times 10^{-2}$ | CA1/CA4                  | 2 |
| GO:0016835 | carbon-oxygen lyase activity                                                            | 2/32 | 74/18352  | $7.36\times 10^{-3}$ | $3.85\times 10^{-2}$ | $1.91\times 10^{-2}$ | CA1/CA4                  | 2 |
| GO:0070491 | repressing transcription factor binding                                                 | 2/32 | 74/18352  | $7.36\times 10^{-3}$ | $3.85\times 10^{-2}$ | $1.91\times 10^{-2}$ | HDAC4/STAT3              | 2 |

**Table SXIII.** KEGG enrichment results of key target genes.

| ID       | Description                                            | Bg ratio | P-value               | P.adjust              | q-value               | Gene ID                            | Count |
|----------|--------------------------------------------------------|----------|-----------------------|-----------------------|-----------------------|------------------------------------|-------|
| hsa05145 | Toxoplasmosis                                          | 112/8085 | 5.04×10 <sup>-5</sup> | 5.00×10 <sup>-3</sup> | 3.80×10 <sup>-3</sup> | ALOX5/STAT3/TLR4/LY96/PIK3CG       | 5     |
| hsa00590 | Arachidonic acid metabolism                            | 61/8085  | 6.94×10 <sup>-5</sup> | 5.00×10 <sup>-3</sup> | 3.80×10 <sup>-3</sup> | ALOX5/TBXAS1/PTGS1/PTGS2           | 4     |
| hsa05417 | Lipid and atherosclerosis                              | 215/8085 | 1.15×10 <sup>-4</sup> | 5.51×10 <sup>-3</sup> | 4.19x10 <sup>-3</sup> | PPP3R1/MMP9/STAT3/TLR4/LY96/PPP3CA | 6     |
| hsa00052 | Galactose metabolism                                   | 31/8085  | 1.93×10 <sup>-4</sup> | 6.96×10 <sup>-3</sup> | 5.29×10 <sup>-3</sup> | MGAM/GAA/HK2                       | 3     |
| hsa05235 | PD-L1 expression and PD-1 checkpoint pathway in cancer | 89/8085  | 3.02×10 <sup>-4</sup> | 7.27×10 <sup>-3</sup> | 5.53×10 <sup>-3</sup> | PPP3R1/STAT3/TLR4/PPP3CA           | 4     |
| hsa00500 | Starch and sucrose metabolism                          | 36/8085  | 3.03×10 <sup>-4</sup> | 7.27×10 <sup>-3</sup> | 5.53×10 <sup>-3</sup> | MGAM/GAA/HK2                       | 3     |
| hsa05167 | Kaposi sarcoma-associated herpesvirus infection        | 194/8085 | 6.61×10 <sup>-4</sup> | 1.36×10 <sup>-2</sup> | 1.03×10 <sup>-2</sup> | PPP3R1/STAT3/PTGS2/PIK3CG/PPP3CA   | 5     |
| hsa04726 | Serotonergic synapse                                   | 115/8085 | 8.00×10 <sup>-4</sup> | 1.44×10 <sup>-2</sup> | 1.09x10 <sup>-2</sup> | DUSP1/ALOX5/PTGS1/PTGS2            | 4     |
| hsa04370 | VEGF signaling pathway                                 | 59/8085  | 1.30×10 <sup>-3</sup> | 2.08×10 <sup>-2</sup> | 1.58×10 <sup>-2</sup> | PPP3R1/PTGS2/PPP3CA                | 3     |
| hsa00910 | Nitrogen metabolism                                    | 17/8085  | 1.75×10 <sup>-3</sup> | 2.52×10 <sup>-2</sup> | 1.91x10 <sup>-2</sup> | CA4/CA1                            | 2     |
| hsa04921 | Oxytocin signaling pathway                             | 154/8085 | 2.36×10 <sup>-3</sup> | 3.09×10 <sup>-2</sup> | 2.35×10 <sup>-2</sup> | PPP3R1/PTGS2/PIK3CG/PPP3CA         | 4     |

Table SXIV. Network results of protein interactions of key genes.

| #node1 | node2  | node1_string_id      | node2_string_id      | neighborhood_on_chromosome | phylogenetic_cooccurrence | homology | coexpression | experimentally_determined_interaction | database_annotated | automated_textmining | combined_score |
|--------|--------|----------------------|----------------------|----------------------------|---------------------------|----------|--------------|---------------------------------------|--------------------|----------------------|----------------|
| ADA    | MPO    | 9606.ENSP00000361965 | 9606.ENSP00000225275 | 0.000                      | 0.000                     | 0.000    | 0.000        | 0.000                                 | 0.000              | 0.498                | 0.497          |
| ADA    | ALPL   | 9606.ENSP00000361965 | 9606.ENSP00000363973 | 0.000                      | 0.000                     | 0.000    | 0.000        | 0.000                                 | 0.000              | 0.458                | 0.458          |
| ADA    | G6PD   | 9606.ENSP00000361965 | 9606.ENSP00000377192 | 0.000                      | 0.000                     | 0.000    | 0.088        | 0.000                                 | 0.000              | 0.513                | 0.537          |
| ADA    | APRT   | 9606.ENSP00000361965 | 9606.ENSP00000367615 | 0.070                      | 0.000                     | 0.000    | 0.172        | 0.604                                 | 0.000              | 0.770                | 0.920          |
| ALOX5  | MPO    | 9606.ENSP00000363512 | 9606.ENSP00000225275 | 0.000                      | 0.000                     | 0.000    | 0.120        | 0.000                                 | 0.000              | 0.543                | 0.581          |
| ALOX5  | PTGS1  | 9606.ENSP00000363512 | 9606.ENSP00000354612 | 0.000                      | 0.000                     | 0.000    | 0.095        | 0.000                                 | 0.900              | 0.728                | 0.973          |
| ALOX5  | PTGS2  | 9606.ENSP00000363512 | 9606.ENSP00000356438 | 0.000                      | 0.000                     | 0.000    | 0.080        | 0.000                                 | 0.900              | 0.758                | 0.975          |
| ALOX5  | MMP9   | 9606.ENSP00000363512 | 9606.ENSP00000361405 | 0.000                      | 0.000                     | 0.000    | 0.159        | 0.000                                 | 0.000              | 0.423                | 0.494          |
| ALOX5  | TLR4   | 9606.ENSP00000363512 | 9606.ENSP00000363089 | 0.000                      | 0.000                     | 0.000    | 0.142        | 0.000                                 | 0.000              | 0.424                | 0.485          |
| ALOX5  | TBXAS1 | 9606.ENSP00000363512 | 9606.ENSP00000389414 | 0.000                      | 0.000                     | 0.000    | 0.120        | 0.000                                 | 0.000              | 0.635                | 0.665          |
| ALPL   | MGAM   | 9606.ENSP00000363973 | 9606.ENSP00000447378 | 0.000                      | 0.000                     | 0.000    | 0.000        | 0.000                                 | 0.000              | 0.500                | 0.500          |
| CA1    | MGAM   | 9606.ENSP00000430656 | 9606.ENSP00000447378 | 0.000                      | 0.000                     | 0.000    | 0.061        | 0.000                                 | 0.000              | 0.578                | 0.586          |
| DUSP1  | STAT3  | 9606.ENSP00000239223 | 9606.ENSP00000264657 | 0.000                      | 0.000                     | 0.000    | 0.058        | 0.000                                 | 0.000              | 0.399                | 0.409          |
| DUSP1  | TLR4   | 9606.ENSP00000239223 | 9606.ENSP00000363089 | 0.000                      | 0.000                     | 0.000    | 0.076        | 0.102                                 | 0.000              | 0.498                | 0.547          |
| DUSP1  | PTGS2  | 9606.ENSP00000239223 | 9606.ENSP00000356438 | 0.000                      | 0.000                     | 0.000    | 0.136        | 0.084                                 | 0.000              | 0.698                | 0.740          |
| G6PD   | HK2    | 9606.ENSP00000377192 | 9606.ENSP00000290573 | 0.000                      | 0.000                     | 0.000    | 0.091        | 0.000                                 | 0.800              | 0.776                | 0.955          |
| G6PD   | MGAM   | 9606.ENSP00000377192 | 9606.ENSP00000447378 | 0.000                      | 0.000                     | 0.000    | 0.064        | 0.000                                 | 0.000              | 0.495                | 0.507          |
| GAA    | HK2    | 9606.ENSP00000305692 | 9606.ENSP00000290573 | 0.000                      | 0.000                     | 0.000    | 0.061        | 0.000                                 | 0.650              | 0.068                | 0.666          |
| GAA    | IGF2R  | 9606.ENSP00000305692 | 9606.ENSP00000349437 | 0.000                      | 0.000                     | 0.000    | 0.000        | 0.000                                 | 0.000              | 0.570                | 0.570          |
| GAA    | PTAFR  | 9606.ENSP00000305692 | 9606.ENSP00000362965 | 0.000                      | 0.000                     | 0.000    | 0.000        | 0.000                                 | 0.900              | 0.000                | 0.900          |
| GAA    | MGAM   | 9606.ENSP00000305692 | 9606.ENSP00000447378 | 0.000                      | 0.000                     | 0.905    | 0.000        | 0.000                                 | 0.900              | 0.835                | 0.907          |
| HDAC4  | STAT3  | 9606.ENSP00000264606 | 9606.ENSP00000264657 | 0.000                      | 0.000                     | 0.000    | 0.052        | 0.111                                 | 0.000              | 0.355                | 0.408          |
| HK2    | MGAM   | 9606.ENSP00000290573 | 9606.ENSP00000447378 | 0.000                      | 0.000                     | 0.000    | 0.061        | 0.000                                 | 0.650              | 0.104                | 0.680          |
| LCN2   | MPO    | 9606.ENSP00000362108 | 9606.ENSP00000225275 | 0.000                      | 0.000                     | 0.000    | 0.088        | 0.000                                 | 0.000              | 0.586                | 0.606          |
| LCN2   | STAT3  | 9606.ENSP00000362108 | 9606.ENSP00000264657 | 0.000                      | 0.000                     | 0.000    | 0.062        | 0.000                                 | 0.900              | 0.440                | 0.942          |
| LCN2   | MMP9   | 9606.ENSP00000362108 | 9606.ENSP00000361405 | 0.000                      | 0.000                     | 0.000    | 0.095        | 0.379                                 | 0.000              | 0.867                | 0.919          |
| LCN2   | TLR4   | 9606.ENSP00000362108 | 9606.ENSP00000363089 | 0.000                      | 0.000                     | 0.000    | 0.000        | 0.000                                 | 0.000              | 0.518                | 0.518          |
| LY96   | TLR4   | 9606.ENSP00000284818 | 9606.ENSP00000363089 | 0.000                      | 0.000                     | 0.000    | 0.176        | 0.871                                 | 0.900              | 0.956                | 0.999          |
| MGAM   | PTAFR  | 9606.ENSP00000447378 | 9606.ENSP00000362965 | 0.000                      | 0.000                     | 0.000    | 0.088        | 0.000                                 | 0.900              | 0.000                | 0.904          |
| MMP9   | MPO    | 9606.ENSP00000361405 | 9606.ENSP00000225275 | 0.000                      | 0.000                     | 0.000    | 0.076        | 0.000                                 | 0.000              | 0.704                | 0.714          |
| MMP9   | SELL   | 9606.ENSP00000361405 | 9606.ENSP00000236147 | 0.000                      | 0.000                     | 0.000    | 0.098        | 0.000                                 | 0.000              | 0.470                | 0.501          |
| MMP9   | STAT3  | 9606.ENSP00000361405 | 9606.ENSP00000264657 | 0.000                      | 0.000                     | 0.000    | 0.000        | 0.000                                 | 0.900              | 0.824                | 0.981          |
| MMP9   | PTGS2  | 9606.ENSP00000361405 | 9606.ENSP00000356438 | 0.000                      | 0.000                     | 0.000    | 0.097        | 0.000                                 | 0.000              | 0.725                | 0.741          |
| MMP9   | TLR4   | 9606.ENSP00000361405 | 9606.ENSP00000363089 | 0.000                      | 0.000                     | 0.000    | 0.115        | 0.000                                 | 0.000              | 0.820                | 0.834          |
| MPO    | STAT3  | 9606.ENSP00000225275 | 9606.ENSP00000264657 | 0.000                      | 0.000                     | 0.000    | 0.000        | 0.000                                 | 0.000              | 0.481                | 0.481          |
| MPO    | SELL   | 9606.ENSP00000225275 | 9606.ENSP00000236147 | 0.000                      | 0.000                     | 0.000    | 0.141        | 0.051                                 | 0.000              | 0.559                | 0.609          |
| MPO    | PTGS2  | 9606.ENSP00000225275 | 9606.ENSP00000356438 | 0.000                      | 0.000                     | 0.000    | 0.065        | 0.000                                 | 0.000              | 0.691                | 0.699          |
| MPO    | TLR4   | 9606.ENSP00000225275 | 9606.ENSP00000363089 | 0.000                      | 0.000                     | 0.000    | 0.088        | 0.000                                 | 0.000              | 0.695                | 0.710          |
| MPO    | PTGS1  | 9606.ENSP00000225275 | 9606.ENSP00000354612 | 0.000                      | 0.000                     | 0.000    | 0.076        | 0.000                                 | 0.900              | 0.408                | 0.940          |
| PIK3CG | TLR4   | 9606.ENSP00000352121 | 9606.ENSP00000363089 | 0.000                      | 0.000                     | 0.000    | 0.107        | 0.182                                 | 0.000              | 0.251                | 0.405          |
| PPP3CA | PPP3R1 | 9606.ENSP00000378323 | 9606.ENSP00000234310 | 0.000                      | 0.385                     | 0.000    | 0.126        | 0.994                                 | 0.900              | 0.934                | 0.999          |
| PTAFR  | STAT3  | 9606.ENSP00000362965 | 9606.ENSP00000264657 | 0.000                      | 0.000                     | 0.000    | 0.000        | 0.000                                 | 0.900              | 0.311                | 0.928          |
| PTAFR  | TLR4   | 9606.ENSP00000362965 | 9606.ENSP00000363089 | 0.000                      | 0.000                     | 0.000    | 0.298        | 0.000                                 | 0.000              | 0.398                | 0.559          |
| PTGS1  | TLR4   | 9606.ENSP00000354612 | 9606.ENSP00000363089 | 0.000                      | 0.000                     | 0.000    | 0.140        | 0.000                                 | 0.000              | 0.344                | 0.411          |
| PTGS1  | PTGS2  | 9606.ENSP00000354612 | 9606.ENSP00000356438 | 0.000                      | 0.432                     | 0.967    | 0.140        | 0.379                                 | 0.800              | 0.956                | 0.889          |
| PTGS1  | TBXAS1 | 9606.ENSP00000354612 | 9606.ENSP00000389414 | 0.000                      | 0.000                     | 0.000    | 0.092        | 0.000                                 | 0.900              | 0.647                | 0.965          |
| PTGS2  | STAT3  | 9606.ENSP00000356438 | 9606.ENSP00000264657 | 0.000                      | 0.000                     | 0.000    | 0.000        | 0.000                                 | 0.900              | 0.810                | 0.980          |
| PTGS2  | TLR4   | 9606.ENSP00000356438 | 9606.ENSP00000363089 | 0.000                      | 0.000                     | 0.000    | 0.140        | 0.000                                 | 0.000              | 0.816                | 0.835          |
| PTGS2  | TBXAS1 | 9606.ENSP00000356438 | 9606.ENSP00000389414 | 0.000                      | 0.000                     | 0.000    | 0.074        | 0.000                                 | 0.900              | 0.524                | 0.952          |
| SELL   | STAT3  | 9606.ENSP00000236147 | 9606.ENSP00000264657 | 0.000                      | 0.000                     | 0.000    | 0.061        | 0.000                                 | 0.000              | 0.509                | 0.519          |
| SELL   | TLR4   | 9606.ENSP00000236147 | 9606.ENSP00000363089 | 0.000                      | 0.000                     | 0.000    | 0.125        | 0.060                                 | 0.000              | 0.572                | 0.617          |
| STAT3  | TLR4   | 9606.ENSP00000264657 | 9606.ENSP00000363089 | 0.000                      | 0.000                     | 0.000    | 0.000        | 0.083                                 | 0.000              | 0.806                | 0.816          |

**Table SXV.** Core genes obtained by the degree value of each gene.

| Name   | Degree |
|--------|--------|
| TLR4   | 12     |
| STAT3  | 9      |
| MPO    | 9      |
| PTGS2  | 8      |
| MMP9   | 7      |
| MGAM   | 6      |
| ALOX5  | 6      |
| PTGS1  | 5      |
| SELL   | 4      |
| LCN2   | 4      |
| PTAFR  | 4      |
| GAA    | 4      |
| ADA    | 4      |
| HK2    | 3      |
| DUSP1  | 3      |
| TBXAS1 | 3      |
| G6PD   | 3      |
| ALPL   | 2      |
| PPP3R1 | 1      |
| PPP3CA | 1      |
| PIK3CG | 1      |
| LY96   | 1      |
| HDAC4  | 1      |
| IGF2R  | 1      |
| CA1    | 1      |
| APRT   | 1      |
